# Supplementary material for: Microglial cannabinoid receptor type 1 mediates social memory deficits in mice produced by adolescent THC exposure and 16p11.2 duplication
Source: PubMed Central journal article supplement (PMC10600150; doi:10.1038/s41467-023-42276-5), 2023-10-25
Supplement: 41467_2023_42276_MOESM2_ESM.pdf [file 41467_2023_42276_MOESM2_ESM.pdf]

## **Description of Additional Supplementary Files**

File Name: Supplementary Data 1

Description: Sample information and gene expression data (CPM)

File Name: Supplementary Data 2

Description: Full statistics from the differential gene expression analyses for each comparison

File Name: Supplementary Data 3

Description: Enriched pathway and upstream regulator list
