# Supplementary material for: Microglial cannabinoid receptor type 1 mediates social memory deficits in mice produced by adolescent THC exposure and 16p11.2 duplication
Source: Nat Commun. 2023 Oct 25;14:6559. doi: 10.1038/s41467-023-42276-5 (PMC10600150; doi:10.1038/s41467-023-42276-5)
Supplement: Supplementary file 3 — Supplementary Data 1 [file 41467_2023_42276_MOESM3_ESM.xlsx]

## Sheet: sample_info
Supplementary Data 1a: Sample information
ID	condition	Reads	MappedReads	percent_mapped	rDNA	Exon	exon_percent	Intron	intron_percent	Intergenic	intergenic_percent	Intron.exon	intron_exon_percent	Intergenic.exon	interg_ex_percent	SurrogateVariable1	SurrogateVariable2	SurrogateVariable3	SurrogateVariable4	SurrogateVariable5
Y1	a_WT_Veh	112518748	83614782	0.7431	6.26	31561210	0.3775	53216617	0.6364	7311432	0.0874	10904812	0.1304	611144	0.0073	-99.3638	35.74	-72.1272	69.4148	-199.408
Y2	a_WT_Veh	156119614	118332138	0.758	4.26	37965057	0.3208	81911678	0.6922	10154899	0.0858	13245935	0.1119	742222	0.0063	-145.353	-270.711	42.3755	3.63849	19.6939
Y3	a_WT_Veh	130708028	103168176	0.7893	5.09	34598876	0.3354	69853586	0.6771	9087051	0.0881	12481238	0.121	658022	0.0064	3.13725	-1.47934	-8.15133	3.65164	2.05309
Y4	a_WT_Veh	109039662	83684892	0.7675	6.41	30439847	0.3637	54874948	0.6557	7196369	0.086	10498981	0.1255	568163	0.0068	-35.907	20.3458	-10.5956	-15.0418	-45.9877
Y5	a_WT_Veh	104962988	77347146	0.7369	4.47	27342528	0.3535	49211776	0.6362	8109260	0.1048	9435356	0.122	600319	0.0078	-62.1297	20.7682	-12.0851	40.6313	-11.5506
Y6	a_WT_Veh	193049366	152502308	0.79	5.39	50470433	0.3309	100790665	0.6609	14117433	0.0926	17451391	0.1144	927119	0.0061	234.815	-16.3643	27.7328	-11.1281	-1.16878
Y7	b_WT_THC	132677698	108540184	0.8181	4.58	40428770	0.3725	70102407	0.6459	9860340	0.0908	14538070	0.1339	769593	0.0071	67.0254	-20.6367	-32.9614	-40.5922	-37.6793
Y8	b_WT_THC	120471184	90887842	0.7544	4.76	31855964	0.3505	58596922	0.6447	9063463	0.0997	11304503	0.1244	639706	0.007	9.8013	18.2216	12.2537	17.2524	-19.0423
Y9	b_WT_THC	117994166	85514276	0.7247	5.64	31516931	0.3686	56196263	0.6572	7178469	0.0839	11052145	0.1292	588161	0.0069	-134.717	59.916	-121.986	-146.854	106.657
Y11	b_WT_THC	146257768	114249604	0.7812	4.03	38564919	0.3375	77049564	0.6744	9369287	0.082	13513879	0.1183	753169	0.0066	144.923	-7.71914	19.6118	-13.4588	-2.25534
Y12	c_16p-Veh	101385922	79598096	0.7851	5.63	27440620	0.3447	52645043	0.6614	6944512	0.0872	9541581	0.1199	527456	0.0066	-6.87315	18.013	3.24986	6.89844	-15.4648
Y13	c_16p-Veh	154304698	120072616	0.7782	3.35	38352520	0.3194	82884632	0.6903	10528326	0.0877	13600759	0.1133	728045	0.0061	171.916	-17.3141	24.1342	-17.5638	3.05385
Y14	c_16p-Veh	135394976	104764406	0.7738	5.97	34605268	0.3303	70266000	0.6707	9094820	0.0868	11669167	0.1114	630642	0.006	-136.14	102.133	233.475	-21.8668	15.0766
Y16	c_16p-Veh	141423312	108315120	0.7659	3.75	38361522	0.3542	73054236	0.6745	9401380	0.0868	13914223	0.1285	766825	0.0071	79.1544	-7.41706	3.08847	-17.4453	19.4999
Y17	d_16p-THC	98125450	74129616	0.7555	5.03	25216900	0.3402	48709563	0.6571	7093098	0.0957	8946963	0.1207	538825	0.0073	-43.2465	11.2224	-14.3801	15.0315	-30.8085
Y18	d_16p-THC	143066620	112835788	0.7887	1.95	37092618	0.3287	75629446	0.6703	9677843	0.0858	13216485	0.1171	759288	0.0067	6.25029	-4.53845	-38.4352	-3.15419	33.49
Y20	d_16p-THC	162649478	121434630	0.7466	5.48	45911509	0.3781	77002024	0.6341	10881440	0.0896	15725995	0.1295	935861	0.0077	-18.4871	40.0433	-42.9327	209.339	146.692
Y21	d_16p-THC	142425046	104727810	0.7353	4.17	33424725	0.3192	71544636	0.6831	9566500	0.0913	11807527	0.1127	659038	0.0063	-34.8063	19.7771	-12.2669	-78.7518	17.1489

## Sheet: TableCPM
Supplementary Data 1b: CPM for all sample
	WT-Veh						WT-THC				16p11dup-Veh				16p11dup-THC
gene	Y1	Y2	Y3	Y4	Y5	Y6	Y7	Y8	Y9	Y11	Y12	Y13	Y14	Y16	Y17	Y18	Y20	Y21
0610005C13Rik	-3.95035	-4.02159	-4.39914	-4.14772	-2.23765	-1.36994	-4.76184	-4.21778	-3.91233	-3.24527	-4.11046	-4.8775	-3.85997	-4.65528	-3.90288	-4.44162	-4.44411	-4.20167
0610007P14Rik	7.83224	-1.69967	2.56664	2.64669	-3.82261	4.70188	3.2097	5.55536	-3.91233	4.90955	5.76759	3.39397	6.64683	2.79593	-0.732954	-2.85666	-4.44411	-4.20167
0610009B22Rik	-0.780423	3.54065	6.31939	2.45219	1.73197	4.20497	4.57131	6.49561	-3.91233	6.4569	4.11354	4.3049	6.0242	3.32771	4.88176	5.22194	4.23185	-4.20167
0610009L18Rik	-3.95035	-4.02159	-4.39914	-4.14772	-3.82261	0.556062	5.69657	-4.21778	-3.91233	0.596032	-4.11046	-4.8775	-3.85997	-4.65528	-2.31792	4.70559	-2.85915	-4.20167
0610009O20Rik	5.10764	5.40257	2.42104	6.10139	4.67324	4.67882	6.82828	4.83479	7.6389	4.85101	5.22269	5.53719	2.28978	5.07434	2.28695	5.90379	7.19659	6.82001
0610010B08Rik	7.60894	-0.693906	4.29574	5.97741	3.9527	4.46316	4.21613	5.67018	7.79582	5.81184	5.83659	6.43831	5.5977	5.73065	5.56395	5.14601	2.85565	8.11537
0610010F05Rik	-0.249908	-4.02159	1.5316	3.10967	-2.23765	3.59662	-1.95449	-2.63281	3.53889	3.44123	1.86682	3.45789	1.18442	5.22277	6.04986	3.95499	2.32408	-1.39431
0610010K14Rik	3.1892	5.78737	4.64252	4.87187	7.2562	4.90432	1.21544	0.305786	5.67826	5.93712	5.22269	4.97581	6.99256	5.84157	6.07297	4.59455	5.76413	5.6328
0610011F06Rik	-2.36539	1.70633	-2.81418	-4.14772	-2.23765	2.80532	-4.76184	1.39693	1.44523	0.724356	2.29893	2.8436	-3.85997	-4.65528	-3.90288	2.5009	-0.743669	-2.61671
0610012G03Rik	4.26397	4.00631	-2.81418	3.51761	-3.82261	5.19992	4.91235	1.45465	4.07067	3.78815	-4.11046	3.03539	2.82653	-1.19585	6.4948	1.11297	2.49841	3.40566
0610030E20Rik	5.88096	7.67059	6.06948	6.16856	8.29015	6.47346	5.03744	6.52116	8.74968	6.24458	6.64359	6.33378	5.7529	5.17603	4.70815	7.23478	5.14273	3.66252
0610031J06Rik	5.53548	3.61503	5.30649	4.82095	5.91717	5.78724	7.13789	7.91569	7.3886	6.93422	7.04752	6.24209	7.68064	7.93133	4.44142	7.63152	8.33787	7.29569
0610031O16Rik	-3.95035	-4.02159	-4.39914	-4.14772	-3.82261	-5.27683	-4.76184	-4.21778	-3.91233	-4.83023	-4.11046	-4.8775	-3.85997	-4.65528	-3.90288	-4.44162	-4.44411	-4.20167
0610037L13Rik	3.91384	7.75772	7.81548	5.0197	6.51835	5.34614	4.43045	1.51014	6.24881	5.47241	5.14457	5.47455	5.19802	5.80722	6.51392	5.26401	6.78771	6.60488
0610038B21Rik	-2.36539	-4.02159	-4.39914	-4.14772	2.94848	-5.27683	-4.76184	-2.63281	-3.91233	-4.83023	-4.11046	-4.8775	-3.85997	-4.65528	-3.90288	-4.44162	-4.44411	-4.20167
0610039K10Rik	-3.95035	4.20241	-2.81418	-4.14772	-3.82261	-1.57639	5.85379	-4.21778	-3.91233	-3.24527	0.533395	-3.29253	-3.85997	2.1129	-3.90288	-0.534728	-1.27418	-4.20167
0610040B10Rik	-3.95035	-4.02159	-4.39914	-4.14772	-3.82261	0.700452	1.74595	-4.21778	-3.91233	-4.83023	-4.11046	1.05324	-3.85997	-4.65528	-3.90288	-4.44162	0.310779	-4.20167
0610040F04Rik	-3.95035	-4.02159	-4.39914	-4.14772	-3.82261	-5.27683	-4.76184	-4.21778	-3.91233	-4.83023	-4.11046	-4.8775	-3.85997	-4.65528	-3.90288	-4.44162	-4.44411	-4.20167
0610040J01Rik	6.82197	7.19939	7.3026	5.87326	7.26684	5.64129	6.65548	5.25593	5.40282	6.43127	4.81732	4.46458	8.88044	6.34119	7.24242	2.853	8.27464	7.66445
0610043K17Rik	-3.95035	-4.02159	-4.39914	-4.14772	-3.82261	-5.27683	-4.76184	-4.21778	-3.91233	-4.83023	-4.11046	-4.8775	-3.85997	-4.65528	-3.90288	-4.44162	-4.44411	-4.20167
1010001N08Rik	-3.95035	-4.02159	-4.39914	-4.14772	-3.82261	-5.27683	-4.76184	-4.21778	-3.91233	-4.83023	-4.11046	-4.8775	-3.85997	-4.65528	-3.90288	-4.44162	-4.44411	-4.20167
1100001G20Rik	-3.95035	-4.02159	-4.39914	-4.14772	-3.82261	-5.27683	-4.76184	-4.21778	-3.91233	-4.83023	-4.11046	-4.8775	-3.85997	-4.65528	-3.90288	-4.44162	-4.44411	-4.20167
1110001J03Rik	-3.95035	-2.43663	1.94071	0.896673	-2.23765	0.700452	3.38282	-0.758344	6.37885	1.88401	-1.30311	1.35132	7.09931	-4.65528	2.20565	-4.44162	-4.44411	-4.20167
1110002L01Rik	2.31794	6.30849	2.01161	-4.14772	2.47568	1.74665	4.03413	3.15291	3.40291	-0.582305	-4.11046	2.87565	-3.85997	3.91632	5.9315	-4.44162	-4.44411	4.35675
1110004E09Rik	5.33736	-4.02159	4.88857	2.45219	-3.82261	3.1867	-4.76184	-2.63281	-3.91233	-1.12979	-4.11046	2.68475	-3.85997	-4.65528	1.65171	-2.11969	-4.44411	-4.20167
1110004F10Rik	6.22583	-4.02159	3.23748	6.44193	4.3322	4.846	4.99472	1.33681	5.17248	3.87367	5.26675	5.2271	6.11014	0.389114	5.54214	4.58905	2.54458	4.63438
1110006O24Rik	-3.95035	-4.02159	-4.39914	-0.447282	-3.82261	0.277761	-0.0069533	2.08601	2.39146	3.04628	2.22939	1.56545	-3.85997	0.702272	-3.90288	3.60823	-4.44411	-4.20167
1110007C09Rik	2.84407	5.37287	4.90692	5.36205	6.69013	2.92774	0.192356	2.90117	-3.91233	3.19767	0.843735	3.13931	3.73249	1.75411	-0.202439	5.3116	5.51444	2.24128
1110008F13Rik	5.67192	-2.43663	2.25907	5.98027	1.49281	4.26237	-1.95449	4.44129	-3.91233	3.29389	4.42846	2.60777	5.91221	4.10959	5.05289	-4.44162	4.66436	6.19802
1110008L16Rik	2.8386	4.20241	5.62425	-4.14772	2.62033	5.6983	6.18141	-2.63281	-1.5904	4.5339	4.40917	4.78606	6.54836	4.88194	5.31871	8.12086	-2.12218	-0.114205
1110008P14Rik	-3.95035	-4.02159	-4.39914	4.3561	-3.82261	-5.27683	-4.76184	-4.21778	-3.91233	0.379221	-4.11046	-4.8775	-2.27501	-4.65528	2.02786	-4.44162	-4.44411	-4.20167
1110012L19Rik	-3.95035	-4.02159	-4.39914	-4.14772	-2.23765	2.10688	-1.95449	1.66487	5.00952	2.24658	3.84954	2.81599	-3.85997	1.82045	-3.90288	-0.982187	-4.44411	3.62488
1110015O18Rik	-3.95035	-4.02159	-4.39914	-4.14772	-3.82261	-5.27683	-4.76184	-4.21778	-3.91233	-4.83023	-4.11046	-4.8775	-3.85997	-4.65528	-3.90288	-4.44162	-4.44411	-4.20167
1110017D15Rik	-3.95035	-4.02159	-4.39914	-4.14772	-3.82261	-5.27683	-4.76184	-4.21778	-3.91233	-4.83023	-4.11046	-4.8775	-3.85997	-4.65528	-3.90288	-4.44162	-4.44411	-4.20167
1110019D14Rik	3.16859	5.34254	2.34233	1.27854	3.04775	2.7288	2.99971	2.88026	-3.91233	3.47811	3.76606	3.1055	3.81951	5.43616	-0.202439	4.32325	3.56152	5.05808
1110020A21Rik	-3.95035	-4.02159	-4.39914	-4.14772	-3.82261	-0.884511	-0.674378	-4.21778	-3.91233	-4.83023	-4.11046	0.251786	-3.85997	-4.65528	-3.90288	-4.44162	-4.44411	-4.20167
1110025L11Rik	-3.95035	-4.02159	-4.39914	-4.14772	-3.82261	-5.27683	-4.76184	-4.21778	-3.91233	-4.83023	-4.11046	-4.8775	-3.85997	-4.65528	-3.90288	-4.44162	-4.44411	-4.20167
1110028F11Rik	-3.95035	-4.02159	-4.39914	-4.14772	-3.82261	-5.27683	-4.76184	-4.21778	-3.91233	-4.83023	-4.11046	-4.8775	-3.85997	-4.65528	-3.90288	-4.44162	-4.44411	-4.20167
1110028F18Rik	-3.95035	-4.02159	-4.39914	-4.14772	-3.82261	-5.27683	-4.76184	-4.21778	-3.91233	-4.83023	-4.11046	-4.8775	-3.85997	-4.65528	-3.90288	-4.44162	-4.44411	-4.20167
1110032A03Rik	4.24441	2.3878	0.958412	3.41452	6.28983	5.48721	5.04712	4.84562	6.40396	0.379221	1.72243	2.69993	2.73994	5.85351	4.13604	4.00546	3.30408	2.39825
1110032F04Rik	-3.95035	-4.02159	-4.39914	-4.14772	-3.82261	-5.27683	-4.76184	-4.21778	-3.91233	-4.83023	-4.11046	-4.8775	-3.85997	-4.65528	-3.90288	-4.44162	-4.44411	-4.20167
1110034G24Rik	0.907633	1.10769	-0.49225	-4.14772	-2.23765	2.40265	3.46216	3.69511	-1.5904	3.57491	2.63101	1.14487	-1.53804	3.5296	-2.31792	1.05023	-4.44411	4.42404
1110036E04Rik	-3.95035	-4.02159	-4.39914	-4.14772	-3.82261	-5.27683	-4.76184	-4.21778	-3.91233	-4.83023	-4.11046	-4.8775	-3.85997	-4.65528	-3.90288	-4.44162	-4.44411	-4.20167
1110037F02Rik	2.02693	3.64374	7.3121	5.94371	7.06537	6.18516	6.1488	6.54128	7.13412	5.88315	3.72874	5.98592	7.6631	5.55295	4.23155	6.61163	7.9203	3.40566
1110038B12Rik	3.5495	-4.02159	2.76073	-1.34037	0.700948	2.38851	1.30425	2.44044	6.34624	-3.24527	2.70972	2.94905	6.63488	3.38364	2.94261	-2.11969	-2.12218	-4.20167
1110038F14Rik	-1.62842	-4.02159	0.810313	5.12607	3.04775	4.21302	-0.117985	2.49647	5.6132	2.13555	-2.5255	4.79316	4.54517	5.10461	5.013	6.69729	5.36807	5.28013
1110046J04Rik	-3.95035	-4.02159	-4.39914	-4.14772	-3.82261	-5.27683	-4.76184	-4.21778	-3.91233	-4.83023	-4.11046	-3.29253	4.69078	-1.84792	-3.90288	-4.44162	-2.85915	-4.20167
1110051M20Rik	-3.95035	-1.21424	5.7159	1.87465	1.38684	2.1578	-0.0069533	-1.89585	-1.10497	2.73201	3.5969	3.84018	-3.85997	-0.0114236	2.60492	-2.85666	3.07159	-4.20167
1110054M08Rik	-3.95035	-4.02159	-4.39914	-2.56276	-3.82261	0.605815	-3.17688	4.63085	-3.91233	-4.83023	-4.11046	-4.8775	-3.85997	-4.65528	-3.90288	-4.44162	6.24851	-4.20167
1110057K04Rik	6.04542	5.49608	5.41304	5.51227	6.75953	4.98879	6.25705	3.09511	2.42752	6.76922	4.75682	3.76996	5.40447	7.3514	6.06146	2.54707	0.510088	4.97076
1110058L19Rik	-3.95035	-4.02159	8.43632	-4.14772	2.51724	1.84211	-0.513913	-0.130313	4.65373	3.00897	1.91191	2.15593	-3.85997	-2.33335	-3.90288	2.42875	-2.85915	-0.114205
1110059E24Rik	4.23453	-4.02159	0.958412	3.93443	1.13158	2.25455	-4.76184	3.43328	5.3568	3.35464	-0.0229988	2.34167	3.15126	3.1585	-3.90288	-0.193691	3.0071	-4.20167
1110059G10Rik	3.79784	6.05922	4.26264	4.12374	4.5654	5.72247	1.01952	-0.517336	-1.5904	2.93132	2.85532	3.98359	3.73249	4.30182	6.0411	2.21659	8.02171	-4.20167
1110065P20Rik	4.42374	-4.02159	-4.39914	-4.14772	-3.82261	-2.11655	-4.76184	-4.21778	-2.32736	-0.501109	1.14806	3.62855	5.58165	-4.65528	2.12215	4.40481	-4.44411	-1.74749
1190002F15Rik	-3.95035	-4.02159	-4.39914	-4.14772	-3.82261	-5.27683	-4.76184	-4.21778	-3.91233	-4.83023	-4.11046	-4.8775	-3.85997	-4.65528	-3.90288	-4.44162	-4.44411	-4.20167
1190002N15Rik	6.28686	-1.21424	-2.81418	3.35212	7.98434	3.3268	4.01624	3.67097	5.38	4.36206	1.6709	2.39863	4.92466	4.77726	-0.732954	1.53566	4.9331	3.50569
1190003K10Rik	-3.95035	-4.02159	-4.39914	-4.14772	-3.82261	-5.27683	-4.76184	-4.21778	-3.91233	-4.83023	-4.11046	-4.8775	-3.85997	-4.65528	-3.90288	-4.44162	-4.44411	-4.20167
1190005I06Rik	-3.95035	-4.02159	-4.39914	-4.14772	-3.82261	-5.27683	-4.76184	-4.21778	-3.91233	-4.83023	-4.11046	-4.8775	-3.85997	-4.65528	-3.90288	-4.44162	-4.44411	-4.20167
1190007I07Rik	5.37383	-4.02159	-4.39914	3.1284	4.47659	2.53695	1.1689	-4.21778	6.22338	3.03395	0.137466	-1.17706	-0.690046	-4.65528	3.44585	5.61773	-4.44411	5.69466
1200014J11Rik	4.1318	5.51174	7.1298	5.94899	4.06613	6.60772	4.08051	4.87762	5.05057	5.29776	6.34384	6.08323	5.02573	5.97317	4.56065	3.51838	7.09165	5.85497
1300002E11Rik	6.06228	6.49903	3.20819	8.19741	7.08653	6.85728	5.33224	4.62457	1.64226	6.90066	6.88883	6.30428	8.55075	3.80824	7.65219	5.3381	3.7208	7.07852
1300002K09Rik	-3.95035	-4.02159	-4.39914	-4.14772	-3.82261	-5.27683	-4.76184	-4.21778	-3.91233	-2.5083	-4.11046	-4.8775	-3.85997	-4.65528	-3.90288	-4.44162	-4.44411	-4.20167
1300017J02Rik	-3.95035	-4.02159	-4.39914	-4.14772	-3.82261	2.23887	-4.76184	-4.21778	-3.91233	-4.83023	-4.11046	-4.8775	-3.85997	-4.65528	-3.90288	-4.44162	-4.44411	-4.20167
1500004A13Rik	-3.95035	0.370724	0.584537	1.60128	3.73963	5.12895	-3.17688	0.434137	-3.91233	-0.923342	3.39987	4.69713	3.31994	3.08861	3.6285	0.915933	4.80875	-2.61671
1500009C09Rik	-3.95035	-4.02159	-4.39914	-4.14772	-3.82261	-5.27683	-4.76184	-4.21778	-3.91233	-4.83023	-4.11046	-4.8775	-3.85997	-4.65528	-3.90288	-0.534728	-4.44411	-4.20167
1500009L16Rik	-3.95035	-4.02159	-4.39914	-4.14772	-3.82261	-5.27683	-4.76184	-4.21778	-3.91233	-4.83023	-4.11046	-4.8775	-3.85997	-4.65528	-3.90288	-4.44162	-4.44411	-4.20167
1500011B03Rik	-3.95035	2.54826	-4.39914	0.71026	-3.82261	2.79463	4.85838	4.35587	-3.91233	2.6044	-4.11046	-1.70757	-3.85997	3.58789	-3.90288	2.24488	-4.44411	-4.20167
1500011K16Rik	6.22832	-0.851669	1.38222	6.09426	5.04466	4.79061	-2.43991	-1.04785	-3.91233	4.81182	3.80243	3.8606	3.67141	-0.748389	-1.58095	3.0422	7.72988	1.68098
1500012F01Rik	6.37945	6.43065	0.886262	-0.0602586	2.62033	2.52407	4.55783	5.53878	-3.91233	3.46898	1.91191	3.93308	-1.53804	1.82045	1.52339	6.61975	-2.85915	3.94299
1500012K07Rik	-3.95035	-4.02159	-4.39914	-4.14772	-3.82261	-5.27683	-4.76184	-4.21778	-3.91233	-4.83023	-4.11046	-4.8775	-3.85997	-4.65528	-3.90288	-4.44162	-4.44411	-4.20167
1500015A07Rik	-3.95035	2.94419	5.84284	1.34413	-0.363182	4.38673	2.39803	3.68309	-2.32736	4.62715	-2.5255	3.64998	5.51724	2.35595	1.97976	3.97201	6.26928	0.656313
1500015L24Rik	-3.95035	-4.02159	-4.39914	-4.14772	-3.82261	-5.27683	-4.76184	-4.21778	-3.91233	-4.83023	-4.11046	-4.8775	-3.85997	-4.65528	-3.90288	-4.44162	-4.44411	-4.20167
1500015O10Rik	-3.95035	-4.02159	-4.39914	-4.14772	-3.82261	-5.27683	-4.76184	-4.21778	-3.91233	-4.83023	-4.11046	0.737213	-3.85997	-4.65528	-3.90288	-4.44162	-4.44411	-4.20167
1500017E21Rik	-3.95035	-2.43663	-4.39914	-4.14772	-3.82261	-5.27683	-4.76184	-4.21778	3.17259	-4.83023	-4.11046	-4.8775	1.68414	1.37902	-3.90288	-4.44162	-4.44411	1.2246
1600002D24Rik	-3.95035	-4.02159	-4.39914	-4.14772	-3.82261	-5.27683	-4.76184	-4.21778	-3.91233	-4.83023	-4.11046	-4.8775	-3.85997	-4.65528	-3.90288	-4.44162	-4.44411	-4.20167
1600002H07Rik	-1.62842	-2.43663	-4.39914	5.6055	2.94557	2.45788	-4.76184	-4.21778	-3.91233	4.74908	-1.30311	1.35132	-3.85997	-3.07032	-1.09552	2.83451	-4.44411	-4.20167
1600002K03Rik	2.79112	4.13322	4.03965	-4.14772	-3.82261	-0.322632	3.76564	1.97205	-3.91233	0.842193	-2.5255	1.38929	-3.85997	2.72842	4.18988	-4.44162	0.510088	4.829
1600010M07Rik	3.20952	0.226334	1.15545	-4.14772	1.7921	3.70331	2.98635	-0.758344	5.69315	-1.3708	5.10628	2.97425	5.49097	1.49447	2.9173	-4.44162	-4.44411	6.69391
1600012H06Rik	6.27696	7.11731	7.96208	6.04772	3.29175	6.07261	7.05095	2.91089	7.11425	5.76639	4.5352	6.22704	7.50956	6.65038	7.94209	4.3166	6.63738	0.19065
1600014C10Rik	3.86343	-2.43663	6.61697	4.5836	5.79025	6.21452	6.04632	8.151	6.96955	4.77895	6.34589	4.86228	5.83873	5.22277	6.10415	6.16108	6.03668	4.18635
1600014C23Rik	-3.95035	-4.02159	-4.39914	-4.14772	-3.82261	-5.27683	-4.76184	-4.21778	-3.91233	-4.83023	-4.11046	-4.8775	-3.85997	-4.65528	-3.90288	-4.44162	-4.44411	-4.20167
1600014K23Rik	-3.95035	-4.02159	-4.39914	-4.14772	-3.82261	-5.27683	-4.76184	-4.21778	-3.91233	-4.83023	-4.11046	-4.8775	-3.85997	-4.65528	-3.90288	-4.44162	-4.44411	-4.20167
1600015I10Rik	-3.95035	-4.02159	-4.39914	-4.14772	-3.82261	-5.27683	-4.76184	-4.21778	-3.91233	-4.83023	-4.11046	-4.8775	-3.85997	-4.65528	-3.90288	-4.44162	-4.44411	-4.20167
1600016N20Rik	-3.95035	-4.02159	-4.39914	-4.14772	-3.82261	-5.27683	-4.76184	-4.21778	-3.91233	-4.83023	-4.11046	-4.8775	-3.85997	-4.65528	-3.90288	-4.44162	-4.44411	-4.20167
1600019K03Rik	-3.95035	-4.02159	-4.39914	-4.14772	-3.82261	-5.27683	-4.76184	-4.21778	-3.91233	-4.83023	-4.11046	-4.8775	-3.85997	-4.65528	-3.90288	-4.44162	-4.44411	-4.20167
1600020E01Rik	-1.62842	3.76631	3.92729	-2.56276	4.74344	2.75108	2.56908	-0.758344	1.44523	4.14418	2.36527	5.33561	6.68981	0.298917	-3.90288	2.47724	1.89574	-1.03174
1600023N17Rik	6.94371	-4.02159	-4.39914	-4.14772	-2.23765	-3.69187	-4.76184	-4.21778	-3.91233	-4.83023	-2.5255	-4.8775	-3.85997	-4.65528	-3.90288	-4.44162	-4.44411	-4.20167
1600025M17Rik	-3.95035	-4.02159	-4.39914	-4.14772	-3.82261	-5.27683	-4.76184	-4.21778	-3.91233	-4.83023	-4.11046	-4.8775	-3.85997	-4.65528	-3.90288	-4.44162	-4.44411	-4.20167
1600027J07Rik	-3.95035	-4.02159	-4.39914	-4.14772	-3.82261	-5.27683	-4.76184	-4.21778	-3.91233	-4.83023	-4.11046	-4.8775	-3.85997	-4.65528	-3.90288	-4.44162	-4.44411	-4.20167
1600029I14Rik	-3.95035	-4.02159	-4.39914	-4.14772	-3.82261	-5.27683	-4.76184	-4.21778	-3.91233	-4.83023	-4.11046	-4.8775	-3.85997	-4.65528	-3.90288	-4.44162	-4.44411	-4.20167
1600029O15Rik	-3.95035	-4.02159	-4.39914	-4.14772	-3.82261	-5.27683	-4.76184	-4.21778	-3.91233	-4.83023	-4.11046	-4.8775	-3.85997	-4.65528	-3.90288	-4.44162	-4.44411	-4.20167
1700001C02Rik	-3.95035	-4.02159	-4.39914	-4.14772	-3.82261	-5.27683	-4.76184	-4.21778	-3.91233	-4.83023	-4.11046	-4.8775	-3.85997	-4.65528	-3.90288	-4.44162	-4.44411	-4.20167
1700001C19Rik	-3.95035	-4.02159	-4.39914	-4.14772	-3.82261	2.03605	3.84918	2.9421	-3.91233	1.50962	-4.11046	3.29743	-3.85997	-4.65528	-3.90288	-4.44162	-4.44411	-4.20167
1700001D01Rik	-3.95035	-4.02159	-4.39914	-4.14772	-3.82261	-5.27683	-4.76184	-4.21778	-3.91233	-4.83023	-4.11046	-4.8775	-3.85997	-4.65528	-3.90288	-4.44162	-4.44411	-4.20167
1700001F09Rik	-3.95035	-4.02159	-4.39914	-4.14772	-3.82261	-5.27683	-4.76184	-4.21778	-3.91233	-4.83023	-4.11046	-4.8775	-3.85997	-4.65528	-3.90288	-4.44162	-4.44411	-4.20167
1700001G11Rik	-3.95035	-4.02159	-4.39914	-4.14772	-3.82261	-5.27683	-4.76184	-4.21778	-3.91233	2.66961	-4.11046	-4.8775	-3.85997	-4.65528	-3.90288	-4.44162	-4.44411	-4.20167
1700001G17Rik	-3.95035	-4.02159	-4.39914	-4.14772	-3.82261	-5.27683	-4.76184	-4.21778	-3.91233	-4.83023	-4.11046	1.46235	-3.85997	-0.95484	-3.90288	-0.534728	-4.44411	-4.20167
1700001J03Rik	-3.95035	-4.02159	-4.39914	-4.14772	-3.82261	-5.27683	-4.76184	-4.21778	-3.91233	-4.83023	-4.11046	-4.8775	-3.85997	-4.65528	-3.90288	-4.44162	-4.44411	-4.20167
1700001J11Rik	-3.95035	-4.02159	-4.39914	-4.14772	-3.82261	-5.27683	-4.76184	-4.21778	-3.91233	-4.83023	-4.11046	-3.29253	-3.85997	-4.65528	-3.90288	-4.44162	-4.44411	-4.20167
1700001K19Rik	-3.95035	-4.02159	-4.39914	-4.14772	-3.82261	0.00857418	-4.76184	-4.21778	-3.91233	-4.83023	-4.11046	-1.17706	-3.85997	-4.65528	-3.90288	-4.44162	-4.44411	-4.20167
1700001K23Rik	-3.95035	-4.02159	-4.39914	-4.14772	-2.23765	-1.36994	-4.76184	-4.21778	-3.91233	-4.83023	-4.11046	-4.8775	-3.85997	-4.65528	-3.90288	-4.44162	-4.44411	-4.20167
1700001L05Rik	-3.95035	-4.02159	-4.39914	3.44474	-3.82261	3.57804	4.24097	-4.21778	-2.32736	4.61892	-4.11046	2.60632	-3.85997	2.4	4.282	-4.44162	-0.196181	-4.20167
1700001L19Rik	-3.95035	-4.02159	-4.39914	-4.14772	-3.82261	-5.27683	-4.76184	-4.21778	-3.91233	-4.83023	-4.11046	-4.8775	-3.85997	-4.65528	-3.90288	-4.44162	-4.44411	-4.20167
1700001O22Rik	-3.95035	-4.02159	-4.39914	-4.14772	-3.82261	-5.27683	-4.76184	-4.21778	-3.91233	-4.83023	-4.11046	-4.8775	-3.85997	-4.65528	-3.90288	-4.44162	-4.44411	-4.20167
1700001P01Rik	-3.95035	-4.02159	3.74552	-4.14772	-3.82261	-5.27683	-4.76184	-4.21778	-3.91233	-4.83023	-4.11046	-4.8775	-3.85997	-4.65528	-3.90288	-4.44162	-4.44411	-4.20167
1700003C15Rik	-3.95035	-4.02159	-4.39914	-4.14772	-3.82261	-5.27683	-4.76184	-4.21778	-3.91233	-4.83023	-4.11046	-4.8775	-3.85997	-4.65528	-3.90288	-4.44162	-4.44411	-4.20167
1700003D09Rik	-3.95035	-4.02159	-4.39914	-4.14772	-3.82261	-5.27683	-4.76184	-4.21778	-3.91233	-4.83023	-4.11046	-4.8775	-3.85997	-4.65528	-3.90288	-4.44162	-4.44411	-4.20167
1700003E16Rik	-3.95035	-4.02159	-4.39914	-4.14772	-3.82261	-5.27683	-4.76184	-4.21778	-3.91233	-4.83023	-4.11046	-4.8775	-3.85997	-4.65528	-3.90288	-4.44162	-4.44411	-4.20167
1700003E24Rik	-3.95035	-4.02159	-4.39914	-4.14772	-3.82261	-5.27683	-4.76184	-4.21778	-3.91233	-4.83023	-4.11046	-4.8775	-3.85997	-4.65528	-3.90288	-4.44162	-4.44411	-4.20167
1700003F12Rik	-3.95035	-4.02159	-2.81418	-4.14772	1.66924	-2.46947	0.282553	-4.21778	-3.91233	-1.12979	-4.11046	-4.8775	-3.85997	-0.748389	-3.90288	-4.44162	0.199748	-4.20167
1700003G13Rik	-3.95035	-4.02159	-4.39914	-4.14772	-3.82261	-5.27683	-4.76184	-4.21778	-3.91233	-4.83023	-4.11046	-4.8775	-3.85997	-4.65528	-3.90288	-4.44162	-4.44411	-4.20167
1700003G18Rik	-3.95035	-4.02159	-4.39914	-4.14772	-3.82261	-5.27683	-4.76184	-4.21778	-3.91233	-4.83023	-4.11046	-4.8775	-3.85997	-4.65528	-3.90288	-4.44162	-4.44411	-4.20167
1700003H04Rik	-3.95035	-4.02159	-4.39914	-4.14772	-3.82261	-5.27683	-4.76184	-4.21778	-3.91233	-4.83023	-4.11046	-4.8775	-3.85997	-4.65528	-3.90288	-4.44162	-4.44411	-4.20167
1700003L19Rik	-3.95035	-4.02159	-4.39914	-4.14772	-3.82261	-5.27683	-4.76184	-4.21778	-3.91233	-4.83023	-4.11046	-4.8775	-3.85997	-4.65528	-3.90288	-4.44162	-4.44411	-4.20167
1700003M02Rik	-3.95035	-4.02159	-4.39914	-4.14772	-3.82261	-5.27683	-4.76184	-4.21778	-3.91233	-4.83023	-4.11046	-4.8775	-3.85997	-4.65528	-3.90288	-4.44162	-4.44411	-4.20167
1700003M07Rik	-3.95035	-4.02159	-4.39914	-4.14772	-3.82261	-5.27683	-4.76184	-4.21778	-3.91233	-4.83023	-4.11046	-4.8775	-3.85997	-4.65528	-3.90288	0.687664	-4.44411	-4.20167
1700003P14Rik	-3.95035	-4.02159	-4.39914	-4.14772	-3.82261	-5.27683	-4.76184	-4.21778	-3.91233	-4.83023	-4.11046	-4.8775	-3.85997	-4.65528	-3.90288	-4.44162	-4.44411	-4.20167
1700006A11Rik	-3.95035	-4.02159	-4.39914	-4.14772	-3.82261	-5.27683	-4.76184	-4.21778	-3.91233	-4.83023	-4.11046	-4.8775	-3.85997	-4.65528	-3.90288	-4.44162	-4.44411	-4.20167
1700006E09Rik	-3.95035	-4.02159	-4.39914	-4.14772	-3.82261	-5.27683	-4.76184	-4.21778	-3.91233	-4.83023	-4.11046	-4.8775	-3.85997	-4.65528	-3.90288	-4.44162	-4.44411	-4.20167
1700006F04Rik	-3.95035	-4.02159	-4.39914	-4.14772	-3.82261	-5.27683	-4.76184	-4.21778	-3.91233	-4.83023	-4.11046	-4.8775	-3.85997	-4.65528	-3.90288	-4.44162	-4.44411	-4.20167
1700006H21Rik	-3.95035	-4.02159	-4.39914	-4.14772	-3.82261	-5.27683	-4.76184	-4.21778	-3.91233	-4.83023	-4.11046	-4.8775	-3.85997	-4.65528	-3.90288	-4.44162	-4.44411	-4.20167
1700007B14Rik	-3.95035	-4.02159	-4.39914	-4.14772	-3.82261	-5.27683	-4.76184	-4.21778	-3.91233	-4.83023	-4.11046	-4.8775	-3.85997	-4.65528	-3.90288	-4.44162	-4.44411	-4.20167
1700007F19Rik	-3.95035	-4.02159	-4.39914	-4.14772	-3.82261	-5.27683	-4.76184	-4.21778	-3.91233	-4.83023	-4.11046	-4.8775	-3.85997	-4.65528	-3.90288	-4.44162	-4.44411	-4.20167
1700007G11Rik	-3.95035	-4.02159	-4.39914	-4.14772	-3.82261	-5.27683	-4.76184	-4.21778	-3.91233	-4.83023	-4.11046	-4.8775	-3.85997	-4.65528	-3.90288	-4.44162	-4.44411	-4.20167
1700007J10Rik	-3.95035	-4.02159	-4.39914	0.71026	-3.82261	-5.27683	-4.76184	-4.21778	-3.91233	-4.83023	-4.11046	-4.8775	-3.85997	-4.65528	-3.90288	-4.44162	-4.44411	-4.20167
1700007K09Rik	-3.95035	-4.02159	-4.39914	-4.14772	-3.82261	-5.27683	-4.76184	-4.21778	-3.91233	-4.83023	-4.11046	-4.8775	-3.85997	-4.65528	-3.90288	-4.44162	-4.44411	-4.20167
1700007K13Rik	-3.95035	-4.02159	-4.39914	-4.14772	-3.82261	-5.27683	-4.76184	-4.21778	-3.91233	-4.83023	-4.11046	-4.8775	-3.85997	-4.65528	-3.90288	-4.44162	-4.44411	-4.20167
1700007L15Rik	-3.95035	-4.02159	-4.39914	-4.14772	-3.82261	2.99463	-4.76184	-4.21778	-3.91233	3.40339	-4.11046	3.74821	-3.85997	1.85251	-3.90288	-4.44162	-4.44411	1.2246
1700007P06Rik	-3.95035	-4.02159	-4.39914	-4.14772	-3.82261	-5.27683	-4.76184	-4.21778	-3.91233	-4.83023	-4.11046	-4.8775	-3.85997	-4.65528	-3.90288	-4.44162	-4.44411	-4.20167
1700008F21Rik	-3.95035	-4.02159	-4.39914	-4.14772	-3.82261	-5.27683	-4.76184	-4.21778	-3.91233	-4.83023	-4.11046	-4.8775	-3.85997	-4.65528	-3.90288	-4.44162	-4.44411	-1.03174
1700008I05Rik	-3.95035	-4.02159	-4.39914	-4.14772	-3.82261	-5.27683	-4.76184	-4.21778	-3.91233	-4.83023	-4.11046	-4.8775	-3.85997	-4.65528	-3.90288	-4.44162	-4.44411	-4.20167
1700008J07Rik	0.297579	-2.43663	-2.81418	-4.14772	0.0842765	2.7288	1.26053	5.37655	2.80192	2.62098	2.70972	2.24144	4.21149	0.702272	-3.90288	-4.44162	-2.12218	3.85903
1700008K24Rik	-3.95035	-4.02159	-4.39914	-4.14772	-3.82261	-5.27683	-4.76184	-4.21778	-3.91233	-4.83023	-4.11046	-4.8775	-3.85997	-4.65528	-3.90288	-4.44162	-4.44411	-4.20167
1700008O03Rik	-3.95035	-4.02159	-4.39914	-4.14772	-3.82261	-2.9549	-4.76184	-4.21778	-3.91233	-4.83023	-4.11046	-4.8775	-3.85997	-4.65528	-3.90288	-4.44162	-4.44411	-4.20167
1700008P02Rik	-3.95035	-4.02159	-4.39914	-4.14772	-3.82261	-5.27683	-4.76184	-4.21778	-3.91233	-4.83023	-4.11046	-4.8775	-3.85997	-4.65528	-3.90288	-4.44162	-4.44411	-4.20167
1700009C05Rik	-3.95035	-4.02159	-4.39914	-4.14772	-3.82261	-5.27683	-4.76184	-4.21778	-3.91233	-4.83023	-4.11046	-4.8775	-3.85997	-4.65528	-3.90288	-4.44162	-4.44411	-4.20167
1700009J07Rik	-3.95035	-1.21424	2.61209	-4.14772	-3.82261	-5.27683	-4.76184	-4.21778	-3.91233	-4.83023	-4.11046	-4.8775	2.32985	-4.65528	-3.90288	-4.44162	-4.44411	-4.20167
1700009N14Rik	-3.95035	-4.02159	-4.39914	-4.14772	-3.82261	-5.27683	-4.76184	-4.21778	-3.91233	-4.83023	-4.11046	-4.8775	-3.85997	-4.65528	-3.90288	-4.44162	-4.44411	-4.20167
1700009P17Rik	-3.95035	-4.02159	-4.39914	-4.14772	-3.82261	1.13256	-4.76184	-4.21778	-3.91233	-0.437915	-4.11046	1.91692	-3.85997	-4.65528	3.27703	3.74326	-4.44411	-1.87974
1700010B08Rik	-3.95035	-4.02159	-4.39914	-4.14772	-3.82261	-5.27683	-4.76184	-4.21778	-3.91233	-4.83023	-4.11046	-4.8775	-3.85997	-4.65528	-3.90288	-4.44162	-4.44411	-4.20167
1700010D01Rik	-3.95035	-4.02159	-4.39914	-4.14772	-3.82261	-5.27683	-4.76184	-4.21778	-3.91233	-1.66031	-4.11046	-4.8775	-3.85997	-4.65528	-3.90288	-4.44162	-4.44411	-4.20167
1700010I02Rik	-3.95035	-4.02159	-4.39914	-4.14772	-3.82261	-5.27683	-4.76184	-4.21778	-3.91233	-4.83023	-4.11046	-4.8775	-3.85997	-4.65528	-3.90288	-4.44162	-4.44411	-4.20167
1700010I14Rik	-3.95035	1.10769	1.70938	-4.14772	-3.82261	0.872919	-4.76184	3.00139	-3.91233	0.951127	-4.11046	2.57371	-2.27501	-3.07032	0.740977	-4.44162	-4.44411	-4.20167
1700010J16Rik	-3.95035	-4.02159	-4.39914	-4.14772	-3.82261	-5.27683	-4.76184	-4.21778	-3.91233	-4.83023	-4.11046	-4.8775	-3.85997	-4.65528	-3.90288	-4.44162	-4.44411	-4.20167
1700010K23Rik	-3.95035	-4.02159	-4.39914	-4.14772	-3.82261	-5.27683	-4.76184	-4.21778	-3.91233	-4.83023	-4.11046	-4.8775	-3.85997	-4.65528	-3.90288	-4.44162	-4.44411	-4.20167
1700011A15Rik	-3.95035	-4.02159	-4.39914	-4.14772	-3.82261	-5.27683	-4.76184	-4.21778	-3.91233	-4.83023	-4.11046	-4.8775	-3.85997	-4.65528	-3.90288	-4.44162	-4.44411	-4.20167
1700011B04Rik	-3.95035	-4.02159	-4.39914	-4.14772	-3.82261	-5.27683	-4.76184	-4.21778	-3.91233	-4.83023	-4.11046	-4.8775	-3.85997	-4.65528	-3.90288	-4.44162	-4.44411	-4.20167
1700011E24Rik	-3.95035	-4.02159	-4.39914	-4.14772	-3.82261	-5.27683	-4.76184	-4.21778	-3.91233	-4.83023	-4.11046	-4.8775	-3.85997	-4.65528	-3.90288	-4.44162	-4.44411	-4.20167
1700011H14Rik	-3.95035	-4.02159	-4.39914	-4.14772	-3.82261	-5.27683	-4.76184	-4.21778	-3.91233	-4.83023	-4.11046	-2.55557	-3.85997	-4.65528	-3.90288	-4.44162	-4.44411	-4.20167
1700011I03Rik	-3.95035	-4.02159	-4.39914	-4.14772	-3.82261	-1.57639	-4.76184	-4.21778	-3.91233	-4.83023	-4.11046	-1.17706	-3.85997	-4.65528	-3.90288	-4.44162	-4.44411	-4.20167
1700011L22Rik	-3.95035	-4.02159	-4.39914	-4.14772	1.30667	-1.8174	1.64755	-4.21778	-0.742401	-4.83023	-4.11046	-1.41806	-3.85997	-4.65528	-1.09552	-4.44162	-4.44411	-2.61671
1700011M02Rik	-3.95035	-4.02159	-4.39914	-4.14772	-3.82261	-5.27683	-4.76184	-4.21778	-3.91233	-4.83023	-4.11046	-4.8775	-3.85997	-4.65528	-3.90288	-4.44162	-4.44411	-4.20167
1700012A03Rik	-3.95035	-4.02159	-4.39914	-4.14772	-3.82261	-5.27683	-4.76184	-4.21778	-3.91233	-4.83023	-4.11046	-4.8775	-3.85997	-4.65528	-3.90288	-4.44162	-4.44411	-4.20167
1700012B07Rik	-3.95035	-4.02159	-4.39914	-4.14772	-3.82261	-5.27683	-4.76184	-4.21778	-3.91233	-4.83023	-4.11046	-4.8775	-3.85997	-4.65528	-3.90288	-4.44162	-4.44411	-4.20167
1700012B09Rik	-3.95035	-4.02159	-4.39914	-4.14772	-3.82261	-5.27683	-4.76184	-4.21778	-3.91233	-4.83023	-4.11046	-4.8775	-3.85997	-4.65528	-3.90288	-4.44162	-4.44411	-4.20167
1700012D01Rik	-3.95035	-4.02159	-4.39914	-4.14772	-2.23765	0.451092	-4.76184	-4.21778	-3.91233	-4.83023	-4.11046	-4.8775	-3.85997	-4.65528	-3.90288	-2.85666	-4.44411	-4.20167
1700012D14Rik	-3.95035	-4.02159	-1.22922	-4.14772	-3.82261	-1.8174	-1.30241	-4.21778	-3.91233	-3.24527	-0.203571	-0.629569	-3.85997	0.202701	-1.09552	-4.44162	-4.44411	0.656313
1700012I11Rik	-3.95035	-4.02159	-4.39914	-4.14772	-3.82261	-5.27683	-4.76184	-4.21778	-3.91233	-4.83023	-4.11046	-4.8775	-3.85997	-4.65528	-3.90288	-4.44162	-4.44411	-4.20167
1700012L04Rik	-3.95035	-4.02159	-4.39914	-4.14772	-3.82261	-5.27683	-4.76184	-4.21778	-3.91233	-4.83023	-4.11046	-4.8775	-3.85997	-4.65528	-3.90288	-4.44162	-4.44411	-4.20167
1700012P22Rik	-3.95035	-4.02159	-4.39914	-4.14772	-3.82261	-5.27683	-4.76184	-4.21778	-3.91233	-4.83023	-4.11046	-4.8775	-3.85997	-4.65528	-3.90288	-4.44162	-4.44411	-4.20167
1700013D24Rik	-3.95035	-4.02159	-4.39914	-4.14772	-3.82261	-5.27683	-4.76184	-4.21778	-3.91233	-4.83023	-4.11046	-4.8775	-3.85997	-4.65528	-3.90288	-4.44162	-4.44411	-4.20167
1700013F07Rik	-3.95035	-4.02159	-4.39914	-4.14772	-3.82261	-5.27683	-4.76184	-4.21778	-3.91233	-4.83023	-4.11046	-4.8775	-3.85997	-4.65528	-3.90288	-4.44162	-4.44411	-4.20167
1700013G24Rik	-3.95035	-4.02159	-4.39914	-4.14772	-3.82261	-5.27683	-4.76184	-4.21778	-3.91233	-4.83023	-4.11046	-4.8775	-3.85997	-4.65528	-3.90288	-4.44162	-4.44411	-4.20167
1700013H16Rik	-3.95035	-4.02159	-4.39914	-4.14772	-3.82261	-5.27683	-4.76184	-4.21778	-3.91233	-4.83023	-4.11046	-4.8775	-3.85997	-4.65528	-3.90288	-4.44162	-4.44411	-4.20167
1700015E13Rik	-3.95035	3.01183	-4.39914	-4.14772	-3.82261	0.149437	-4.76184	-4.21778	-3.91233	-4.83023	0.137466	-4.8775	-3.85997	-4.65528	-3.90288	-2.85666	-4.44411	-4.20167
1700015F17Rik	-3.95035	-4.02159	-4.39914	-4.14772	-3.82261	-5.27683	-4.76184	-4.21778	-3.91233	-4.83023	-4.11046	-4.8775	-3.85997	-4.65528	-3.90288	-4.44162	-4.44411	-4.20167
1700015G11Rik	-3.95035	-4.02159	-4.39914	-4.14772	-3.82261	-5.27683	-4.76184	-4.21778	-3.91233	-4.83023	-4.11046	-4.8775	-3.85997	-4.65528	-3.90288	-4.44162	-4.44411	-4.20167
1700016C15Rik	-3.95035	-4.02159	-4.39914	-4.14772	-3.82261	-5.27683	-4.76184	-4.21778	-3.91233	-4.83023	-4.11046	-4.8775	-3.85997	-4.65528	-3.90288	-4.44162	-4.44411	-4.20167
1700016D06Rik	-3.95035	-4.02159	-4.39914	-4.14772	-3.82261	-5.27683	-4.76184	-4.21778	-3.91233	-4.83023	-4.11046	-4.8775	-3.85997	-4.65528	-3.90288	-4.44162	-4.44411	-4.20167
1700016G22Rik	-3.95035	-4.02159	-4.39914	-4.14772	-3.82261	-5.27683	-4.76184	-4.21778	-3.91233	-4.83023	-4.11046	-4.8775	-3.85997	-4.65528	-3.90288	-4.44162	-4.44411	-4.20167
1700016H13Rik	-3.95035	-4.02159	-4.39914	-4.14772	-3.82261	-5.27683	-4.76184	-4.21778	-3.91233	-4.83023	-4.11046	-4.8775	-3.85997	-4.65528	-3.90288	-4.44162	-4.44411	-4.20167
1700016K19Rik	-3.95035	-4.02159	-4.39914	-4.14772	-3.82261	-5.27683	-4.76184	-4.21778	-3.91233	-4.83023	-4.11046	-4.8775	-3.85997	-4.65528	-3.90288	-4.44162	-4.44411	-4.20167
1700016L04Rik	-3.95035	-4.02159	-4.39914	-4.14772	-3.82261	-0.521941	-4.76184	-4.21778	-3.91233	-4.83023	-4.11046	-4.8775	-3.85997	-4.65528	-3.90288	-4.44162	-4.44411	-4.20167
1700016L21Rik	-3.95035	-4.02159	-4.39914	-4.14772	-3.82261	-5.27683	-4.76184	-4.21778	-3.91233	-4.83023	-4.11046	-4.8775	-3.85997	-4.65528	-3.90288	-4.44162	-4.44411	-4.20167
1700016P04Rik	-3.95035	-4.02159	-4.39914	-4.14772	-3.82261	-5.27683	-4.76184	-4.21778	-3.91233	-4.83023	-4.11046	-4.8775	-3.85997	-4.65528	-3.90288	-4.44162	-4.44411	-4.20167
1700017B05Rik	8.60735	9.32395	8.95965	9.49872	8.03808	9.24471	8.9025	8.72346	9.74063	9.33239	9.52378	8.61473	9.45532	9.12064	8.45275	9.49585	10.6454	9.64196
1700017D01Rik	-3.95035	-4.02159	-4.39914	-4.14772	-3.82261	-5.27683	-4.76184	-4.21778	-3.91233	-4.83023	-4.11046	-4.8775	-3.85997	-4.65528	-3.90288	-4.44162	-4.44411	-4.20167
1700017G19Rik	-3.95035	-4.02159	-4.39914	-4.14772	-3.82261	-5.27683	-4.76184	-4.21778	-3.91233	-4.83023	-4.11046	-4.8775	-3.85997	-4.65528	-3.90288	-4.44162	-4.44411	-4.20167
1700017J07Rik	-3.95035	-4.02159	-4.39914	-4.14772	-3.82261	-5.27683	-4.76184	-4.21778	-3.91233	-4.83023	-4.11046	-4.8775	-3.85997	-4.65528	-3.90288	-4.44162	-4.44411	-4.20167
1700017N19Rik	-3.95035	-4.02159	-4.39914	-4.14772	-3.82261	-5.27683	-4.76184	-4.21778	-3.91233	-4.83023	-4.11046	-4.8775	-3.85997	-4.65528	-3.90288	-4.44162	-4.44411	-4.20167
1700018A04Rik	-3.95035	-4.02159	-4.39914	-4.14772	-3.82261	-5.27683	-4.76184	-4.21778	-3.91233	-4.83023	-4.11046	-4.8775	-3.85997	-4.65528	-3.90288	-4.44162	-4.44411	-4.20167
1700018B08Rik	-3.95035	-4.02159	-4.39914	-4.14772	-3.82261	-5.27683	-4.76184	-4.21778	-3.91233	-4.83023	-4.11046	-4.8775	-3.85997	-4.65528	-3.90288	-4.44162	-4.44411	-4.20167
1700018B24Rik	-3.95035	-4.02159	-4.39914	-4.14772	-3.82261	-5.27683	-4.76184	-4.21778	-3.91233	-4.83023	-4.11046	-4.8775	-3.85997	-4.65528	-3.90288	-4.44162	-4.44411	-4.20167
1700018C11Rik	-3.95035	-4.02159	-4.39914	-4.14772	-3.82261	-5.27683	-4.76184	-4.21778	-3.91233	-4.83023	-4.11046	-4.8775	-3.85997	-4.65528	-3.90288	-4.44162	-4.44411	-4.20167
1700018F24Rik	-3.95035	-4.02159	-4.39914	-4.14772	-3.82261	-5.27683	-4.76184	-4.21778	-3.91233	-4.83023	-4.11046	-4.8775	-3.85997	-4.65528	-3.90288	-4.44162	-4.44411	-4.20167
1700018G05Rik	-3.95035	-4.02159	-4.39914	-4.14772	-3.82261	-5.27683	-4.76184	-4.21778	-3.91233	-4.83023	-4.11046	-4.8775	-3.85997	-4.65528	-3.90288	-4.44162	-4.44411	-4.20167
1700018L02Rik	-1.14299	-4.02159	-4.39914	-4.14772	-3.82261	1.2297	-4.76184	-4.21778	-3.91233	-4.83023	-4.11046	-4.8775	1.73637	-4.65528	-1.09552	-4.44162	-0.693502	-4.20167
1700019A02Rik	-3.95035	-4.02159	-4.39914	-4.14772	-3.82261	-5.27683	-4.76184	-4.21778	-3.91233	-4.83023	-4.11046	-4.8775	-3.85997	-4.65528	-3.90288	-4.44162	-4.44411	-4.20167
1700019B03Rik	-3.95035	-4.02159	-4.39914	-4.14772	-3.82261	-5.27683	-4.76184	-4.21778	-3.91233	-4.83023	-4.11046	-4.8775	-3.85997	-4.65528	-3.90288	-4.44162	-4.44411	-4.20167
1700019B21Rik	-3.95035	-4.02159	-4.39914	-4.14772	-3.82261	-5.27683	-4.76184	-4.21778	-3.91233	-4.83023	-4.11046	-4.8775	-3.85997	-4.65528	-3.90288	-4.44162	-4.44411	-4.20167
1700019D03Rik	-3.95035	-4.02159	-2.81418	-4.14772	-3.82261	0.395597	-4.76184	-4.21778	-3.91233	1.96418	-4.11046	-4.8775	-3.85997	-4.65528	-3.90288	-2.85666	-4.44411	-4.20167
1700019E08Rik	-3.95035	-4.02159	-4.39914	-4.14772	-3.82261	-5.27683	-4.76184	-4.21778	-3.91233	-4.83023	-4.11046	-4.8775	-3.85997	-4.65528	-3.90288	-4.44162	-4.44411	-4.20167
1700019G17Rik	-3.95035	-4.02159	-4.39914	-4.14772	-3.82261	-5.27683	-4.76184	-4.21778	-3.91233	-4.83023	-4.11046	-4.8775	-3.85997	-4.65528	-3.90288	-4.44162	-4.44411	-4.20167
1700019G24Rik	-3.95035	-4.02159	-4.39914	-4.14772	-3.82261	-5.27683	-4.76184	-4.21778	-3.91233	-4.83023	-4.11046	-4.8775	-3.85997	-4.65528	-3.90288	-4.44162	-4.44411	-4.20167
1700019L03Rik	-3.95035	-4.02159	-4.39914	-4.14772	-3.82261	-5.27683	-4.76184	-4.21778	-3.91233	-4.83023	-4.11046	-4.8775	-3.85997	-4.65528	-3.90288	-4.44162	-4.44411	-4.20167
1700019M22Rik	-3.95035	-4.02159	-4.39914	-4.14772	-3.82261	-5.27683	-4.76184	-4.21778	-3.91233	-4.83023	-4.11046	-4.8775	-3.85997	-4.65528	-3.90288	-4.44162	-4.44411	-4.20167
1700019N19Rik	-3.95035	-4.02159	-4.39914	-4.14772	-3.82261	-5.27683	-4.76184	-4.21778	-3.91233	-4.83023	-4.11046	-4.8775	-3.85997	-4.65528	-3.90288	-4.44162	-4.44411	-4.20167
1700019O17Rik	-3.95035	-4.02159	-4.39914	-4.14772	-3.82261	-5.27683	-4.76184	-4.21778	-3.91233	-4.83023	-4.11046	-4.8775	-3.85997	-4.65528	-3.90288	-4.44162	-4.44411	-4.20167
1700020A23Rik	-3.95035	-4.02159	-4.39914	-4.14772	-3.82261	-5.27683	-4.76184	-4.21778	-3.91233	-4.83023	-4.11046	-4.8775	-3.85997	-4.65528	-3.90288	-4.44162	-4.44411	-4.20167
1700020D05Rik	-3.95035	-4.02159	-4.39914	-4.14772	-3.82261	-5.27683	-4.76184	-4.21778	-3.91233	-2.02288	-4.11046	-4.8775	-3.85997	-4.65528	-3.90288	-4.44162	-4.44411	1.68098
1700020G17Rik	-3.95035	-4.02159	-4.39914	-4.14772	-3.82261	-5.27683	-4.76184	-4.21778	-3.91233	-4.83023	-4.11046	-4.8775	-3.85997	-4.65528	-3.90288	-4.44162	-4.44411	-4.20167
1700020I14Rik	5.79617	6.51853	6.02608	3.71646	5.99916	5.69687	6.19454	5.89205	3.57149	6.21348	5.70172	6.65535	-0.400539	4.21816	5.99345	4.91373	2.1558	4.24542
1700020L24Rik	-3.95035	-4.02159	-4.39914	-4.14772	-3.82261	-3.69187	-4.76184	-4.21778	-3.91233	-4.83023	-4.11046	-4.8775	-3.85997	1.36709	-3.90288	-4.44162	-4.44411	-4.20167
1700020M21Rik	-3.95035	-4.02159	-4.39914	-4.14772	-3.82261	-5.27683	-4.76184	-4.21778	-3.91233	-4.83023	-4.11046	-4.8775	-3.85997	-4.65528	-3.90288	-4.44162	-4.44411	-4.20167
1700020N01Rik	-3.95035	-2.43663	-4.39914	-4.14772	-3.82261	1.43742	-4.76184	3.71886	-3.91233	-1.3708	-4.11046	-4.8775	-3.85997	-4.65528	3.93632	2.79679	-4.44411	-4.20167
1700020N15Rik	-3.95035	-4.02159	-4.39914	-4.14772	-3.82261	-5.27683	-4.76184	-4.21778	-3.91233	-4.83023	-4.11046	-4.8775	-3.85997	-4.65528	-3.90288	-4.44162	-4.44411	-4.20167
1700020N18Rik	-3.95035	-4.02159	-4.39914	-4.14772	-3.82261	-5.27683	-4.76184	-4.21778	-3.91233	-4.83023	-4.11046	-4.8775	-3.85997	-4.65528	-3.90288	-4.44162	-4.44411	-4.20167
1700021F05Rik	-3.95035	-2.43663	-4.39914	-4.14772	0.569703	2.84729	-3.17688	-1.89585	0.611236	1.61271	-4.11046	2.6694	-3.85997	1.91458	4.67077	-4.44162	1.04774	2.56652
1700021F07Rik	-3.95035	-4.02159	-4.39914	-4.14772	-3.82261	-5.27683	-4.76184	-4.21778	-3.91233	-4.83023	-4.11046	-4.8775	-3.85997	-4.65528	-3.90288	-4.44162	-4.44411	-4.20167
1700021K19Rik	2.3895	-2.43663	5.33387	5.85931	4.30151	4.40792	5.39424	5.70258	7.04695	4.21689	4.33662	3.62633	3.76208	5.97681	3.37325	3.34628	1.28381	5.45118
1700021N21Rik	-3.95035	-4.02159	-4.39914	-4.14772	-3.82261	-1.18937	-4.76184	-4.21778	-3.91233	-4.83023	-4.11046	-4.8775	-3.85997	-4.65528	-3.90288	-4.44162	-4.44411	-4.20167
1700022A21Rik	-3.95035	-4.02159	-4.39914	-4.14772	-3.82261	-5.27683	-4.76184	-4.21778	-3.91233	-4.83023	-4.11046	-4.8775	-3.85997	-4.65528	-3.90288	-4.44162	-4.44411	-4.20167
1700022A22Rik	-3.95035	-4.02159	-4.39914	-4.14772	-3.82261	-5.27683	-4.76184	-4.21778	-3.91233	-4.83023	-4.11046	-4.8775	-3.85997	-4.65528	-3.90288	-4.44162	-4.44411	-4.20167
1700022E09Rik	-3.95035	-4.02159	-4.39914	-4.14772	-3.82261	-5.27683	-4.76184	-4.21778	-3.91233	-4.83023	-4.11046	-4.8775	-3.85997	-4.65528	-3.90288	-4.44162	-4.44411	-4.20167
1700022H16Rik	-3.95035	-4.02159	-4.39914	-4.14772	-3.82261	-5.27683	-4.76184	-4.21778	-3.91233	-4.83023	-4.11046	-4.8775	-3.85997	-4.65528	-3.90288	-4.44162	-4.44411	-4.20167
1700022I11Rik	-3.95035	-4.02159	-4.39914	-4.14772	-3.82261	-5.27683	-4.76184	-4.21778	-3.91233	-4.83023	-4.11046	-4.8775	-3.85997	-4.65528	-3.90288	-4.44162	-4.44411	-4.20167
1700023C21Rik	-3.95035	-4.02159	-4.39914	-4.14772	-3.82261	-5.27683	-4.76184	-4.21778	-3.91233	-4.83023	-4.11046	-4.8775	-3.85997	-4.65528	-3.90288	-4.44162	-4.44411	-4.20167
1700023E05Rik	-3.95035	-4.02159	-4.39914	-4.14772	-3.82261	-5.27683	-4.76184	-4.21778	-3.91233	-4.83023	-4.11046	-4.8775	-3.85997	-4.65528	-3.90288	-4.44162	-4.44411	-4.20167
1700023F02Rik	-3.95035	-4.02159	-4.39914	-4.14772	-3.82261	-5.27683	-4.76184	-4.21778	-3.91233	-4.83023	-4.11046	-4.8775	-3.85997	-4.65528	-3.90288	-4.44162	-4.44411	-4.20167
1700023F06Rik	-3.95035	-4.02159	-4.39914	-4.14772	-3.82261	-5.27683	-4.76184	-4.21778	-3.91233	-4.83023	-4.11046	-4.8775	-3.85997	-4.65528	-3.90288	-4.44162	-4.44411	-4.20167
1700023L04Rik	-3.95035	-4.02159	-4.39914	-4.14772	-3.82261	-3.69187	-4.76184	-4.21778	-3.91233	-4.83023	-4.11046	-4.8775	-3.85997	-4.65528	-3.90288	-4.44162	-4.44411	-4.20167
1700024B18Rik	-3.95035	-4.02159	-4.39914	-4.14772	-3.82261	-5.27683	-4.76184	-4.21778	-3.91233	-4.83023	-4.11046	-4.8775	-3.85997	-4.65528	-3.90288	-4.44162	-4.44411	-4.20167
1700024F13Rik	-3.95035	-4.02159	-4.39914	-4.14772	-3.82261	2.63606	-4.76184	-4.21778	-3.91233	-3.24527	-2.5255	-3.29253	-3.85997	-4.65528	-3.90288	-4.44162	3.0071	-4.20167
1700024G13Rik	-3.95035	-4.02159	-4.39914	-4.14772	-3.82261	-5.27683	-4.76184	-4.21778	-3.91233	-4.83023	-4.11046	-4.8775	-3.85997	-4.65528	-3.90288	-4.44162	-4.44411	-4.20167
1700024P04Rik	-3.95035	-4.02159	-4.39914	-4.14772	-3.82261	-5.27683	-4.76184	-4.21778	-3.91233	-4.83023	-4.11046	-4.8775	-3.85997	-4.65528	-3.90288	-4.44162	-4.44411	-4.20167
1700024P16Rik	-3.95035	-4.02159	-4.39914	-4.14772	-3.82261	-5.27683	-4.76184	-4.21778	-3.91233	-4.83023	-4.11046	-4.8775	-3.85997	-4.65528	-3.90288	-4.44162	-4.44411	-4.20167
1700025B11Rik	-3.95035	-4.02159	-4.39914	-4.14772	-3.82261	-5.27683	-4.76184	-4.21778	-3.91233	-4.83023	-4.11046	-4.8775	-3.85997	-4.65528	-3.90288	-4.44162	-4.44411	-4.20167
1700025C18Rik	-3.95035	-4.02159	-4.39914	-4.14772	-3.82261	-5.27683	-4.76184	-4.21778	-3.91233	-4.83023	-4.11046	-4.8775	-3.85997	-4.65528	-3.90288	-4.44162	-4.44411	-4.20167
1700025F22Rik	-3.95035	-4.02159	-4.39914	-4.14772	-3.82261	-5.27683	-4.76184	-4.21778	-3.91233	-4.83023	-4.11046	-4.8775	-3.85997	-4.65528	-3.90288	-4.44162	-4.44411	-4.20167
1700025F24Rik	-3.95035	-4.02159	-4.39914	-4.14772	-3.82261	-5.27683	-4.76184	-4.21778	-3.91233	-4.83023	-4.11046	-4.8775	-3.85997	-4.65528	-3.90288	-4.44162	-4.44411	-4.20167
1700025G04Rik	0.693508	-4.02159	-0.00682305	0.100206	-3.82261	3.0496	3.98299	0.174542	4.71338	3.62509	0.533395	1.09978	-1.53804	3.48938	-3.90288	3.29309	-4.44411	-4.20167
1700025K24Rik	-3.95035	-4.02159	-4.39914	-4.14772	-3.82261	-5.27683	-4.76184	-4.21778	-3.91233	-4.83023	-4.11046	-4.8775	-3.85997	-4.65528	-3.90288	-4.44162	-4.44411	-4.20167
1700025M24Rik	-3.95035	-4.02159	-4.39914	-4.14772	-3.82261	-5.27683	-4.76184	-4.21778	-3.91233	-4.83023	-4.11046	-4.8775	-3.85997	-4.65528	-3.90288	-4.44162	-4.44411	-4.20167
1700025N23Rik	2.7639	-4.02159	3.82486	0.806475	2.62033	0.080724	-4.76184	-0.310885	-0.0054351	1.39859	5.79191	0.737213	-3.85997	-4.65528	4.11393	-0.193691	-0.356646	-1.87974
1700026D08Rik	-3.95035	-4.02159	-4.39914	-4.14772	-3.82261	-5.27683	-4.76184	-4.21778	-3.91233	-4.83023	-4.11046	-4.8775	-3.85997	-4.65528	-3.90288	-4.44162	-4.44411	-4.20167
1700026D11Rik	-3.95035	-4.02159	-4.39914	-4.14772	-3.82261	-5.27683	-4.76184	-4.21778	-3.91233	-4.83023	-4.11046	-4.8775	-3.85997	-4.65528	-3.90288	-4.44162	-4.44411	-4.20167
1700026F02Rik	-3.95035	-4.02159	-4.39914	-4.14772	-3.82261	-5.27683	-4.76184	-4.21778	-3.91233	-4.83023	-4.11046	-4.8775	-3.85997	-4.65528	-3.90288	-4.44162	-4.44411	-4.20167
1700026L06Rik	-3.95035	-4.02159	-4.39914	-4.14772	-3.82261	-5.27683	-4.76184	-4.21778	-3.91233	-4.83023	-4.11046	-4.8775	-3.85997	-4.65528	-3.90288	-4.44162	-4.44411	-4.20167
1700027A15Rik	-3.95035	-4.02159	-4.39914	-4.14772	-3.82261	-5.27683	-4.76184	-4.21778	-3.91233	-4.83023	-4.11046	-4.8775	-3.85997	-4.65528	-3.90288	-4.44162	-4.44411	-4.20167
1700027F09Rik	-3.95035	-4.02159	-4.39914	-4.14772	-3.82261	-5.27683	-4.76184	-4.21778	-3.91233	-4.83023	-4.11046	-4.8775	-3.85997	-4.65528	-3.90288	-4.44162	-4.44411	-4.20167
1700027H10Rik	-3.95035	-4.02159	-4.39914	-4.14772	-3.82261	-5.27683	-4.76184	-4.21778	-3.91233	-4.83023	-4.11046	-4.8775	-3.85997	-4.65528	-3.90288	-4.44162	-4.44411	-4.20167
1700027I24Rik	-3.95035	-4.02159	-4.39914	-4.14772	-3.82261	-5.27683	-4.76184	-4.21778	-3.91233	-4.83023	-4.11046	-4.8775	-3.85997	-4.65528	-3.90288	-4.44162	-4.44411	-4.20167
1700027J07Rik	-3.95035	-4.02159	-4.39914	-4.14772	-3.82261	-5.27683	-4.76184	-4.21778	-3.91233	-4.83023	-4.11046	-4.8775	-3.85997	-4.65528	-3.90288	-4.44162	-4.44411	-4.20167
1700028B04Rik	-3.95035	-4.02159	-4.39914	-4.14772	-3.82261	-5.27683	-4.76184	-4.21778	-3.91233	-4.83023	-4.11046	-4.8775	-3.85997	-4.65528	-3.90288	-4.44162	-4.44411	-4.20167
1700028D13Rik	-3.95035	-4.02159	-4.39914	-4.14772	-3.82261	-5.27683	-4.76184	-4.21778	-3.91233	-4.83023	-4.11046	-4.8775	-3.85997	-4.65528	-3.90288	-4.44162	-4.44411	-4.20167
1700028E10Rik	-3.95035	-4.02159	4.88395	1.87465	-0.363182	1.49136	-4.76184	3.03961	-3.91233	-2.5083	3.91744	2.28237	-3.85997	3.37263	3.68958	4.66952	2.69544	-2.61671
1700028I16Rik	-3.95035	-4.02159	-4.39914	-4.14772	-3.82261	-5.27683	-4.76184	-4.21778	-3.91233	-4.83023	-4.11046	-4.8775	-3.85997	-4.65528	-3.90288	-4.44162	-4.44411	-4.20167
1700028J19Rik	-3.95035	-4.02159	-4.39914	-4.14772	-3.82261	-5.27683	-4.76184	-4.21778	-3.91233	-4.83023	-4.11046	-4.8775	-3.85997	-4.65528	-3.90288	-4.44162	-4.44411	-4.20167
1700028K03Rik	0.297579	-4.02159	-4.39914	-4.14772	-0.652689	2.93749	3.96267	-0.310885	-3.91233	-2.02288	-0.0229988	0.548768	-3.85997	-4.65528	-1.58095	-4.44162	5.44919	2.59275
1700028M03Rik	-3.95035	-4.02159	-4.39914	-4.14772	-3.82261	-5.27683	-4.76184	-4.21778	-3.91233	-4.83023	-4.11046	-4.8775	-3.85997	-4.65528	-3.90288	-4.44162	-4.44411	-4.20167
1700028P14Rik	-3.95035	-4.02159	-4.39914	-4.14772	-3.82261	-5.27683	-4.76184	-4.21778	-3.91233	-4.83023	-4.11046	-4.8775	-3.85997	-4.65528	-3.90288	-4.44162	-4.44411	-4.20167
1700028P15Rik	-3.95035	-4.02159	-4.39914	-4.14772	-3.82261	-5.27683	-4.76184	-4.21778	-3.91233	-4.83023	-4.11046	-4.8775	-3.85997	-4.65528	-3.90288	-4.44162	-4.44411	-4.20167
1700029B22Rik	-3.95035	-4.02159	-4.39914	-4.14772	-3.82261	-5.27683	-4.76184	-4.21778	-3.91233	-4.83023	-4.11046	-4.8775	-3.85997	-4.65528	-3.90288	-4.44162	-4.44411	-4.20167
1700029F12Rik	-3.95035	-4.02159	-4.39914	-4.14772	-3.82261	-5.27683	-4.76184	-4.21778	-3.91233	-4.83023	-4.11046	-4.8775	-3.85997	-4.65528	-3.90288	-4.44162	-4.44411	-4.20167
1700029H14Rik	-3.95035	-4.02159	-4.39914	-4.14772	-3.82261	-5.27683	-4.76184	-4.21778	-3.91233	-4.83023	-4.11046	-4.8775	-3.85997	-4.65528	-3.90288	-4.44162	-4.44411	-4.20167
1700029I15Rik	-3.95035	-4.02159	-4.39914	-4.14772	-3.82261	-5.27683	-4.76184	-4.21778	0.175137	-4.83023	-4.11046	-4.8775	-3.85997	-4.65528	-0.202439	-4.44162	-4.44411	3.39079
1700029J03Rik	-3.95035	-4.02159	-4.39914	-4.14772	-3.82261	-5.27683	-4.76184	-4.21778	-3.91233	-4.83023	-4.11046	-4.8775	-3.85997	-4.65528	-3.90288	-4.44162	-4.44411	-4.20167
1700029J07Rik	2.52539	-0.851669	1.02712	-4.14772	0.932273	0.872919	4.6369	5.02302	-3.91233	1.50962	-4.11046	3.82641	-3.85997	2.96677	-3.90288	-4.44162	-4.44411	-4.20167
1700029M20Rik	-3.95035	-4.02159	-4.39914	-4.14772	-3.82261	-5.27683	-4.76184	-4.21778	-3.91233	-4.83023	-4.11046	-4.8775	-3.85997	-4.65528	-3.90288	-4.44162	-4.44411	-4.20167
1700029N11Rik	-3.95035	-4.02159	-4.39914	-4.14772	-3.82261	-5.27683	-4.76184	-4.21778	-3.91233	-4.83023	-4.11046	-4.8775	-3.85997	-4.65528	-3.90288	-4.44162	-4.44411	-4.20167
1700029P11Rik	-3.95035	-4.02159	-4.39914	-4.14772	-3.82261	-5.27683	-4.76184	-4.21778	-3.91233	-4.83023	-4.11046	-4.8775	-3.85997	-4.65528	-3.90288	-4.44162	-4.44411	-4.20167
1700030A11Rik	-3.95035	-4.02159	-4.39914	-4.14772	-3.82261	-5.27683	-4.76184	-4.21778	-3.91233	-4.83023	-4.11046	-4.8775	-3.85997	-4.65528	-3.90288	-4.44162	-4.44411	-4.20167
1700030C10Rik	-3.95035	-4.02159	-4.39914	-4.14772	-3.82261	-5.27683	-1.30241	-2.63281	-3.91233	2.50068	-4.11046	1.49754	-3.85997	-4.65528	-3.90288	-4.44162	-4.44411	-4.20167
1700030F04Rik	-3.95035	-4.02159	-4.39914	-4.14772	-3.82261	-5.27683	-4.76184	-4.21778	-3.91233	-4.83023	-4.11046	-4.8775	-3.85997	-4.65528	-3.90288	-4.44162	-4.44411	-4.20167
1700030F18Rik	-3.95035	-4.02159	-4.39914	-4.14772	-3.82261	-5.27683	-4.76184	-4.21778	-3.91233	-4.83023	-4.11046	-4.8775	-3.85997	-4.65528	-3.90288	-4.44162	-4.44411	-4.20167
1700030J22Rik	-3.95035	-4.02159	-4.39914	-4.14772	-3.82261	2.12405	-4.76184	-4.21778	-2.32736	-4.83023	-4.11046	-4.8775	-3.85997	-4.65528	-3.90288	-4.44162	-4.44411	3.51943
1700030K09Rik	-3.95035	-2.43663	-0.939709	2.56652	3.14317	2.76209	-3.17688	-2.63281	3.03019	4.18936	-4.11046	2.11119	-3.85997	6.39389	-0.202439	2.54707	2.2141	-4.20167
1700030L20Rik	-3.95035	-4.02159	-4.39914	-4.14772	-3.82261	-5.27683	-4.76184	-4.21778	-3.91233	-4.83023	-4.11046	-4.8775	-3.85997	-4.65528	-3.90288	-4.44162	-4.44411	-4.20167
1700030M09Rik	-3.95035	-4.02159	-4.39914	-4.14772	-3.82261	-5.27683	-4.76184	-4.21778	-3.91233	-4.83023	-4.11046	-4.8775	-3.85997	-4.65528	-3.90288	-4.44162	-4.44411	-4.20167
1700030N03Rik	-3.95035	-4.02159	-4.39914	-4.14772	-3.82261	-5.27683	-4.76184	-4.21778	-3.91233	-4.83023	-4.11046	-4.8775	-3.85997	-4.65528	-3.90288	-4.44162	-4.44411	-4.20167
1700030O20Rik	-3.95035	-4.02159	-4.39914	-4.14772	-3.82261	-5.27683	-4.76184	-4.21778	-3.91233	-4.83023	-4.11046	-4.8775	-3.85997	-4.65528	-3.90288	-4.44162	-4.44411	-4.20167
1700031A10Rik	-3.95035	-4.02159	-4.39914	-4.14772	-3.82261	-5.27683	-4.76184	-4.21778	-3.91233	-4.83023	-4.11046	-4.8775	-3.85997	-4.65528	-3.90288	-4.44162	-4.44411	-4.20167
1700031F05Rik	-3.95035	-4.02159	-4.39914	-4.14772	-3.82261	-5.27683	-4.76184	-4.21778	-3.91233	-4.83023	-4.11046	-4.8775	-3.85997	-4.65528	-3.90288	-4.44162	-4.44411	-4.20167
1700031M16Rik	-3.95035	-4.02159	-4.39914	-4.14772	-3.82261	-5.27683	-4.76184	-4.21778	-3.91233	-4.83023	-4.11046	-4.8775	-3.85997	-4.65528	-3.90288	-4.44162	-4.44411	-4.20167
1700031P21Rik	-3.95035	-4.02159	-4.39914	-4.14772	-3.82261	-5.27683	-4.76184	-4.21778	-3.91233	-4.83023	-4.11046	-4.8775	-3.85997	-4.65528	-3.90288	-4.44162	-4.44411	-4.20167
1700034E13Rik	-3.95035	-4.02159	-4.39914	-4.14772	-3.82261	-5.27683	-4.76184	-4.21778	-3.91233	-4.83023	-4.11046	-4.8775	-3.85997	-4.65528	-3.90288	-4.44162	-4.44411	-4.20167
1700034F02Rik	-3.95035	-0.562162	-4.39914	-4.14772	-3.82261	1.71186	3.79658	-4.21778	-3.91233	-4.83023	-4.11046	-4.8775	-3.85997	-4.65528	-3.90288	-4.44162	-4.44411	-4.20167
1700034G24Rik	-3.95035	-4.02159	-4.39914	-4.14772	-3.82261	-5.27683	-4.76184	-4.21778	-3.91233	-4.83023	-4.11046	-4.8775	-3.85997	-4.65528	-3.90288	-4.44162	-4.44411	-4.20167
1700034H15Rik	-3.95035	-4.02159	-4.39914	-4.14772	-3.82261	-5.27683	-4.76184	-4.21778	-3.91233	-4.83023	-4.11046	0.556131	-3.85997	-4.65528	-3.90288	-4.44162	-4.44411	-4.20167
1700034I23Rik	-3.95035	-4.02159	-4.39914	-4.14772	-3.82261	2.80532	-4.76184	-4.21778	-3.91233	-4.83023	4.918	-4.8775	-3.85997	-0.95484	2.47216	-4.44162	-4.44411	-4.20167
1700034J05Rik	-3.95035	-4.02159	-4.39914	-4.14772	-3.82261	-0.521941	-4.76184	-4.21778	-3.91233	-4.83023	2.36527	-0.23364	-3.85997	-4.65528	-3.90288	-4.44162	-4.44411	-4.20167
1700034K08Rik	-3.95035	-4.02159	-4.39914	-4.14772	-3.82261	-5.27683	-4.76184	-4.21778	-3.91233	-4.83023	-4.11046	-4.8775	-3.85997	-4.65528	-3.90288	-4.44162	-4.44411	-4.20167
1700034O15Rik	-3.95035	-4.02159	-4.39914	-4.14772	-3.82261	-5.27683	-4.76184	-4.21778	-3.91233	-4.83023	-4.11046	-4.8775	-3.85997	-4.65528	-3.90288	-4.44162	-4.44411	-4.20167
1700034P13Rik	-3.95035	-4.02159	-4.39914	1.08877	-3.82261	-5.27683	5.64833	-4.21778	-3.91233	-4.83023	-4.11046	-2.0255	-3.85997	-4.65528	-3.90288	-4.44162	-4.44411	6.16845
1700036G14Rik	-3.95035	-4.02159	-4.39914	-4.14772	-3.82261	-5.27683	-4.76184	-4.21778	-3.91233	-4.83023	-4.11046	-4.8775	-3.85997	-4.65528	-3.90288	-4.44162	-4.44411	-4.20167
1700037C18Rik	0.693508	-4.02159	-4.39914	-4.14772	-3.82261	0.451092	-4.76184	0.736421	1.57953	-4.83023	-4.11046	-0.970606	-3.85997	-4.65528	-3.90288	-4.44162	-4.44411	-4.20167
1700037H04Rik	-3.95035	-1.21424	-4.39914	-4.14772	-3.82261	0.556062	-4.76184	-4.21778	-3.91233	-3.24527	1.86682	1.6303	-2.27501	4.40812	-3.90288	-4.44162	-2.12218	-4.20167
1700039E15Rik	-3.95035	-4.02159	-4.39914	-4.14772	-3.82261	1.84211	-4.76184	-4.21778	-3.91233	-4.83023	-4.11046	-4.8775	-3.85997	-4.65528	-3.90288	-4.44162	-4.44411	-4.20167
1700039E22Rik	-3.95035	-4.02159	-4.39914	-4.14772	-3.82261	-5.27683	-4.76184	-4.21778	-3.91233	-4.83023	-4.11046	-4.8775	-3.85997	-4.65528	-3.90288	-4.44162	-4.44411	-4.20167
1700040L02Rik	-3.95035	-4.02159	-4.39914	-4.14772	-3.82261	-5.27683	-4.76184	-4.21778	-3.91233	-4.83023	-4.11046	-4.8775	-3.85997	-4.65528	-3.90288	-4.44162	-4.44411	-4.20167
1700041C23Rik	-3.95035	-4.02159	-4.39914	-4.14772	-3.82261	-5.27683	-4.76184	-4.21778	-3.91233	-4.83023	-4.11046	-4.8775	-3.85997	-4.65528	-3.90288	-4.44162	-4.44411	-4.20167
1700041M19Rik	-3.95035	-4.02159	-4.39914	-4.14772	-3.82261	-5.27683	-4.76184	-4.21778	-3.91233	-4.83023	-4.11046	-4.8775	-3.85997	-4.65528	-3.90288	-4.44162	-4.44411	-4.20167
1700042B14Rik	-3.95035	-4.02159	-4.39914	-4.14772	-3.82261	-1.18937	-4.76184	-4.21778	-3.91233	-4.83023	-4.11046	-4.8775	-3.85997	-4.65528	-3.90288	-4.44162	-4.44411	-4.20167
1700042G07Rik	-3.95035	-4.02159	-4.39914	-4.14772	-3.82261	-5.27683	-4.76184	-4.21778	-3.91233	-4.83023	-4.11046	-4.8775	-3.85997	-4.65528	-3.90288	-4.44162	-4.44411	-4.20167
1700042G15Rik	-3.95035	-4.02159	-4.39914	-4.14772	-3.82261	-5.27683	-4.76184	-4.21778	-3.91233	-4.83023	-4.11046	-4.8775	-3.85997	-4.65528	-3.90288	-4.44162	-4.44411	-4.20167
1700042O10Rik	-3.95035	-4.02159	-4.39914	-4.14772	-3.82261	-5.27683	-4.76184	-4.21778	-3.91233	-4.83023	-4.11046	-4.8775	-3.85997	-4.65528	-3.90288	-4.44162	-4.44411	-4.20167
1700044C05Rik	-3.95035	-4.02159	-4.39914	-4.14772	-3.82261	-5.27683	-4.76184	-4.21778	-3.91233	-4.83023	-4.11046	-4.8775	-3.85997	-4.65528	-3.90288	-4.44162	-4.44411	-4.20167
1700044K03Rik	-3.95035	-4.02159	-4.39914	-4.14772	-3.82261	-5.27683	-4.76184	-4.21778	-3.91233	-4.83023	-4.11046	-4.8775	-3.85997	-4.65528	-3.90288	-4.44162	-4.44411	-4.20167
1700045H11Rik	-3.95035	-4.02159	-4.39914	-4.14772	-3.82261	-5.27683	-4.76184	-4.21778	-3.91233	-4.83023	-4.11046	-4.8775	-3.85997	-4.65528	-3.90288	-4.44162	-4.44411	-4.20167
1700046C09Rik	-3.95035	-4.02159	-4.39914	-4.14772	-3.82261	-5.27683	-4.76184	-4.21778	-3.91233	-4.83023	-4.11046	-4.8775	-3.85997	-4.65528	-3.90288	-4.44162	-4.44411	-4.20167
1700047A11Rik	-3.95035	-4.02159	-4.39914	-4.14772	-3.82261	-5.27683	-4.76184	-4.21778	2.06495	-4.83023	-4.11046	-4.8775	-3.85997	-4.65528	-3.90288	-4.44162	-4.44411	-4.20167
1700047E10Rik	-3.95035	-4.02159	-4.39914	-4.14772	-3.82261	-5.27683	-4.76184	-4.21778	-3.91233	-4.83023	-4.11046	-4.8775	-3.85997	-4.65528	-3.90288	-4.44162	-4.44411	-4.20167
1700047G03Rik	-3.95035	-4.02159	-4.39914	-4.14772	-3.82261	-5.27683	-4.76184	-4.21778	-3.91233	-4.83023	-4.11046	-4.8775	-3.85997	-4.65528	-3.90288	-4.44162	-4.44411	-4.20167
1700047I17Rik2	4.17046	4.34447	5.34905	-1.34037	0.264849	3.44973	3.63904	5.94152	4.79848	4.0832	1.91191	3.54675	-1.2277	3.97742	3.48944	4.72364	0.310779	5.10667
1700047L14Rik	-3.95035	-4.02159	-4.39914	-4.14772	-3.82261	-5.27683	-4.76184	-4.21778	-3.91233	-4.83023	-4.11046	-4.8775	-3.85997	-4.65528	-3.90288	-4.44162	-4.44411	-4.20167
1700047M11Rik	-3.95035	-4.02159	-4.39914	-4.14772	-3.82261	-1.57639	-4.76184	-4.21778	-3.91233	-4.83023	-4.11046	-4.8775	-3.85997	-4.65528	-3.90288	-4.44162	-4.44411	-4.20167
1700048M11Rik	-3.95035	-4.02159	-4.39914	-4.14772	-3.82261	-2.1069	-4.76184	-4.21778	-3.91233	-4.83023	-4.11046	-4.8775	-3.85997	-4.65528	-3.90288	-4.44162	-4.44411	-4.20167
1700048O20Rik	-2.36539	-4.02159	-4.39914	-4.14772	2.55243	-5.27683	-4.76184	-2.63281	-3.91233	-4.83023	-4.11046	-0.629569	-3.85997	-4.65528	-3.90288	-4.44162	-4.44411	-4.20167
1700049E15Rik	-3.95035	-4.02159	-4.39914	-4.14772	-3.82261	-5.27683	-4.76184	-4.21778	-3.91233	-4.83023	-4.11046	-4.8775	-3.85997	-4.65528	-3.90288	-4.44162	-4.44411	-4.20167
1700049E22Rik	-3.95035	-4.02159	-4.39914	-4.14772	-3.82261	-5.27683	-4.76184	-4.21778	-3.91233	-4.83023	-4.11046	-4.8775	-3.85997	-4.65528	-3.90288	-4.44162	-4.44411	-4.20167
1700049G17Rik	-0.0434575	5.69577	4.47983	4.57474	4.34179	4.05534	2.47656	7.22465	-1.10497	2.77235	4.17031	4.50513	6.86369	4.15381	4.70075	5.07951	-1.63675	4.66561
1700049L16Rik	-3.95035	-4.02159	-4.39914	-4.14772	-3.82261	-5.27683	-4.76184	-4.21778	-3.91233	-4.83023	-4.11046	-4.8775	-3.85997	-4.65528	-3.90288	-4.44162	-4.44411	-4.20167
1700051A21Rik	-3.95035	-4.02159	-4.39914	-4.14772	-3.82261	-5.27683	-4.76184	-4.21778	-3.91233	-4.83023	-4.11046	-4.8775	-3.85997	-4.65528	-3.90288	-4.44162	-4.44411	-4.20167
1700052I22Rik	-3.95035	-4.02159	-4.39914	-4.14772	-3.82261	-5.27683	-4.76184	-4.21778	-3.91233	-4.83023	-4.11046	-4.8775	-3.85997	-4.65528	-3.90288	-4.44162	-4.44411	-4.20167
1700052K11Rik	-3.95035	-2.43663	-4.39914	-4.14772	-3.82261	1.75659	-3.17688	2.44044	-3.91233	-4.83023	-4.11046	-1.17706	-2.27501	-4.65528	-3.90288	-4.44162	5.63937	-4.20167
1700052N19Rik	7.41105	4.09215	4.93848	3.44474	1.03537	1.64204	3.10235	6.70034	-2.32736	1.14705	3.61064	3.26716	-3.85997	-0.262962	2.83859	5.2361	-2.85915	-4.20167
1700054A03Rik	-3.95035	-4.02159	-4.39914	-4.14772	-3.82261	-5.27683	-4.76184	-4.21778	-3.91233	-4.83023	-4.11046	-4.8775	-3.85997	-4.65528	-3.90288	-4.44162	-4.44411	-4.20167
1700054K19Rik	-3.95035	-4.02159	-4.39914	-4.14772	-3.82261	-5.27683	-4.76184	-4.21778	-3.91233	-4.83023	-4.11046	-4.8775	-3.85997	-4.65528	-3.90288	-4.44162	-4.44411	-4.20167
1700054M17Rik	-3.95035	-4.02159	-4.39914	-4.14772	-3.82261	-5.27683	-4.76184	-4.21778	-3.91233	-4.83023	-4.11046	-4.8775	-3.85997	-4.65528	-3.90288	-4.44162	-4.44411	-4.20167
1700054O13Rik	-3.95035	-4.02159	-4.39914	-4.14772	-3.82261	-5.27683	-4.76184	-4.21778	-3.91233	-4.83023	-4.11046	-4.8775	-3.85997	-4.65528	-3.90288	-4.44162	-4.44411	-4.20167
1700055C04Rik	-3.95035	-4.02159	-4.39914	-4.14772	-3.82261	-5.27683	-4.76184	-4.21778	-3.91233	-4.83023	-4.11046	-4.8775	-3.85997	-4.65528	-3.90288	-4.44162	-4.44411	-4.20167
1700055N04Rik	-3.95035	-4.02159	-4.39914	-4.14772	-3.82261	-5.27683	-4.76184	-4.21778	-3.91233	-4.83023	-4.11046	-4.8775	-3.85997	-4.65528	-3.90288	-4.44162	-4.44411	-4.20167
1700056E22Rik	-3.95035	-4.02159	-4.39914	-4.14772	-3.82261	-5.27683	-4.76184	-4.21778	-3.91233	-4.83023	-4.11046	-4.8775	-3.85997	-4.65528	-3.90288	-4.44162	-4.44411	-4.20167
1700057G04Rik	-3.95035	-4.02159	-4.39914	-4.14772	-3.82261	-5.27683	-4.76184	-4.21778	-3.91233	-4.83023	-4.11046	-4.8775	-3.85997	-4.65528	-3.90288	-4.44162	-4.44411	-4.20167
1700057H15Rik	-3.95035	-4.02159	-4.39914	-4.14772	-3.82261	-5.27683	-4.76184	-4.21778	-3.91233	-4.83023	-4.11046	-4.8775	-3.85997	-4.65528	-3.90288	-4.44162	-4.44411	-4.20167
1700060C16Rik	-3.95035	-4.02159	-4.39914	-4.14772	-3.82261	-5.27683	-4.76184	-4.21778	-3.91233	-4.83023	-4.11046	-4.8775	-3.85997	-4.65528	-3.90288	-4.44162	-4.44411	-4.20167
1700060C20Rik	-3.95035	-4.02159	-4.39914	-4.14772	-3.82261	-5.27683	-4.76184	-4.21778	-3.91233	-4.83023	-4.11046	-4.8775	-3.85997	-4.65528	-3.90288	-4.44162	-4.44411	-4.20167
1700061F12Rik	-3.95035	-4.02159	-4.39914	-4.14772	-3.82261	-5.27683	-4.76184	-4.21778	-3.91233	-4.83023	-4.11046	-4.8775	-3.85997	-4.65528	-3.90288	-4.44162	-4.44411	-4.20167
1700061G19Rik	-3.95035	-4.02159	-4.39914	-4.14772	-3.82261	-5.27683	-4.76184	-4.21778	-3.91233	-4.83023	-4.11046	-4.8775	-3.85997	-4.65528	-3.90288	-4.44162	-2.85915	-4.20167
1700061I17Rik	-3.95035	-4.02159	-4.39914	-4.14772	-3.82261	-5.27683	-4.76184	-4.21778	-3.91233	-4.83023	-4.11046	-4.8775	-3.85997	-4.65528	-3.90288	-4.44162	-4.44411	-4.20167
1700063A18Rik	-3.95035	-4.02159	-4.39914	-4.14772	-3.82261	-5.27683	-4.76184	-4.21778	-3.91233	-4.83023	-4.11046	-4.8775	-3.85997	-4.65528	-3.90288	-4.44162	-4.44411	-4.20167
1700063D05Rik	-3.95035	-4.02159	-4.39914	-4.14772	-3.82261	-5.27683	-4.76184	-4.21778	-3.91233	-4.83023	-4.11046	-4.8775	-3.85997	-4.65528	-3.90288	-4.44162	-4.44411	-4.20167
1700063O14Rik	-3.95035	-4.02159	-4.39914	-4.14772	-3.82261	-5.27683	-4.76184	-4.21778	-3.91233	-4.83023	-4.11046	-4.8775	-3.85997	-4.65528	-3.90288	-4.44162	-4.44411	-4.20167
1700064J06Rik	-3.95035	-4.02159	-4.39914	-4.14772	-3.82261	-5.27683	-4.76184	-4.21778	-3.91233	-4.83023	-4.11046	-4.8775	-3.85997	-4.65528	-3.90288	-4.44162	-4.44411	-4.20167
1700064M15Rik	-3.95035	-4.02159	-4.39914	-4.14772	-3.82261	-5.27683	-4.76184	-4.21778	-3.91233	-4.83023	-4.11046	-4.8775	-3.85997	-4.65528	-3.90288	-4.44162	-4.44411	-4.20167
1700065D16Rik	-3.95035	-4.02159	-4.39914	-4.14772	-3.82261	-5.27683	-4.76184	-4.21778	-3.91233	-4.83023	-4.11046	-4.8775	-3.85997	-4.65528	-3.90288	-4.44162	-4.44411	-4.20167
1700065I16Rik	-3.95035	-4.02159	-4.39914	-4.14772	-3.82261	-5.27683	-4.76184	-4.21778	-3.91233	-4.83023	-4.11046	-4.8775	-3.85997	-4.65528	-3.90288	-4.44162	-4.44411	-4.20167
1700065J11Rik	-3.95035	-4.02159	-4.39914	-4.14772	-3.82261	-5.27683	-4.76184	-4.21778	-3.91233	-4.83023	-4.11046	-4.8775	-3.85997	-4.65528	-3.90288	-4.44162	-4.44411	-4.20167
1700065J18Rik	-3.95035	-4.02159	-4.39914	-4.14772	-3.82261	-5.27683	-4.76184	-4.21778	-3.91233	-4.83023	-4.11046	-4.8775	-3.85997	-4.65528	-3.90288	-4.44162	-4.44411	-4.20167
1700065L07Rik	-3.95035	-4.02159	-4.39914	-4.14772	-3.82261	-5.27683	-4.76184	-4.21778	-3.91233	-4.83023	-4.11046	-4.8775	-3.85997	-4.65528	-3.90288	-4.44162	-4.44411	-4.20167
1700065O20Rik	-3.95035	-4.02159	-4.39914	-4.14772	-3.82261	-5.27683	-4.76184	-4.21778	-3.91233	-4.83023	-4.11046	-4.8775	-3.85997	-4.65528	-3.90288	-4.44162	-4.44411	-4.20167
1700066B17Rik	-3.95035	-4.02159	-4.39914	-4.14772	-3.82261	-5.27683	-4.76184	-4.21778	-3.91233	-4.83023	-4.11046	-4.8775	-3.85997	-4.65528	-3.90288	-4.44162	-4.44411	-4.20167
1700066B19Rik	-3.95035	-4.02159	-4.39914	-4.14772	-3.82261	0.504532	4.17774	-2.63281	-2.32736	-4.83023	-4.11046	2.77356	-3.85997	-4.65528	6.97594	-4.44162	-4.44411	3.42038
1700066M21Rik	-1.14299	-0.114703	2.83926	-2.56276	2.01028	3.52083	4.46938	-4.21778	-1.5904	2.53609	2.96635	1.6303	4.05292	6.65704	-3.90288	-0.982187	-4.44411	1.00779
1700066N21Rik	-3.95035	-4.02159	-4.39914	-4.14772	-3.82261	-5.27683	-4.76184	-4.21778	-3.91233	-4.83023	-4.11046	-4.8775	-3.85997	-4.65528	-3.90288	-4.44162	-4.44411	-4.20167
1700066O22Rik	-3.95035	-4.02159	-4.39914	-4.14772	-3.82261	-5.27683	-4.76184	-4.21778	-3.91233	-4.83023	-4.11046	-4.8775	-3.85997	-4.65528	-3.90288	-4.44162	-4.44411	-4.20167
1700067G17Rik	-3.95035	-4.02159	-4.39914	-4.14772	-3.82261	-5.27683	-4.76184	-4.21778	-3.91233	-4.83023	-4.11046	-4.8775	-3.85997	-4.65528	-3.90288	-4.44162	-4.44411	-4.20167
1700067K01Rik	-3.95035	-4.02159	-4.39914	-4.14772	-3.82261	-5.27683	-4.76184	-2.63281	-3.91233	-4.83023	-4.11046	-2.07014	-3.85997	-4.65528	-3.90288	-4.44162	-4.44411	-2.61671
1700067P10Rik	-3.95035	-4.02159	-4.39914	-4.14772	-3.82261	-5.27683	-4.76184	-4.21778	-3.91233	-4.83023	-4.11046	-4.8775	-3.85997	-4.65528	-3.90288	-4.44162	-4.44411	-4.20167
1700069L16Rik	-3.95035	-4.02159	-4.39914	-4.14772	-3.82261	-5.27683	-4.76184	-4.21778	-3.91233	-4.83023	-4.11046	-4.8775	-3.85997	-4.65528	-3.90288	-4.44162	-4.44411	-4.20167
1700069P05Rik	-3.95035	-4.02159	-4.39914	-4.14772	-3.82261	-5.27683	-4.76184	-4.21778	-3.91233	-4.83023	-4.11046	-4.8775	-3.85997	-4.65528	-3.90288	-4.44162	-4.44411	-4.20167
1700071K01Rik	-3.95035	-4.02159	-4.39914	-4.14772	-3.82261	-5.27683	-4.76184	-4.21778	-3.91233	-4.83023	-4.11046	-4.8775	-3.85997	-4.65528	-3.90288	-4.44162	-4.44411	-4.20167
1700071M16Rik	-3.95035	-4.02159	-4.39914	-4.14772	-3.82261	-0.884511	-4.76184	-4.21778	-3.91233	-4.83023	3.51159	-4.8775	-3.85997	-4.65528	-3.90288	-4.44162	-2.85915	-4.20167
1700072B07Rik	-3.95035	-4.02159	-4.39914	-4.14772	-3.82261	-5.27683	-4.76184	-4.21778	-3.91233	-4.83023	-4.11046	-4.8775	-3.85997	-4.65528	-3.90288	-4.44162	-4.44411	-4.20167
1700072O05Rik	-3.95035	-4.02159	-4.39914	-4.14772	-3.82261	-5.27683	-4.76184	-4.21778	-3.91233	-4.83023	-4.11046	-4.8775	-3.85997	-4.65528	-3.90288	-4.44162	-4.44411	-4.20167
1700073E17Rik	-3.95035	-4.02159	-4.39914	-4.14772	-3.82261	-5.27683	-4.76184	-4.21778	-3.91233	-4.83023	-4.11046	-4.8775	-3.85997	-4.65528	-3.90288	-4.44162	-4.44411	-4.20167
1700074H08Rik	-3.95035	-4.02159	-4.39914	-4.14772	-3.82261	-5.27683	-4.76184	-4.21778	-3.91233	-4.83023	-4.11046	-4.8775	-3.85997	-4.65528	-3.90288	-4.44162	-4.44411	-4.20167
1700074P13Rik	-3.95035	-4.02159	-4.39914	-4.14772	-3.82261	-5.27683	-4.76184	-4.21778	-3.91233	-4.83023	-4.11046	-4.8775	-3.85997	-4.65528	-3.90288	-4.44162	-4.44411	-4.20167
1700080E11Rik	-3.95035	-4.02159	-4.39914	-4.14772	-3.82261	-5.27683	-4.76184	-4.21778	-3.91233	-4.83023	-4.11046	-4.8775	-3.85997	-4.65528	-3.90288	-4.44162	-4.44411	-4.20167
1700080N15Rik	-3.95035	-4.02159	-4.39914	-4.14772	-3.82261	-3.69187	-4.76184	-4.21778	-3.91233	-4.83023	-4.11046	-4.8775	-3.85997	-4.65528	-3.90288	-4.44162	-4.44411	-4.20167
1700080O16Rik	-3.95035	-4.02159	-4.39914	-4.14772	-3.82261	-5.27683	-4.76184	-4.21778	-3.91233	-4.83023	-4.11046	-4.8775	-3.85997	-4.65528	-3.90288	-4.44162	-4.44411	-4.20167
1700081H04Rik	-3.95035	-4.02159	-4.39914	-4.14772	-3.82261	-5.27683	-4.76184	-4.21778	-3.91233	-4.83023	-4.11046	-4.8775	-3.85997	-4.65528	-3.90288	-4.44162	-4.44411	-4.20167
1700084C01Rik	-3.95035	-4.02159	-4.39914	-4.14772	-3.82261	-5.27683	-4.76184	-4.21778	-3.91233	-4.83023	-1.30311	-4.8775	-3.85997	-4.65528	-3.90288	-4.44162	-4.44411	-4.20167
1700084E18Rik	-3.95035	-4.02159	3.25191	-4.14772	2.32713	1.23097	-4.76184	-4.21778	-3.91233	-4.83023	-4.11046	-3.29253	-3.85997	-4.65528	-3.90288	-4.44162	-4.44411	-4.20167
1700084F23Rik	-3.95035	-4.02159	-4.39914	-4.14772	-3.82261	-5.27683	-4.76184	-4.21778	-3.91233	-4.83023	-4.11046	-4.8775	-3.85997	-4.65528	-3.90288	-4.44162	-4.44411	-4.20167
1700084J12Rik	-3.95035	-4.02159	-4.39914	-4.14772	-3.82261	-5.27683	-4.76184	-4.21778	-3.91233	-4.83023	-4.11046	-4.8775	-3.85997	-4.65528	-3.90288	-4.44162	-4.44411	-4.20167
1700085C21Rik	-3.95035	-4.02159	-4.39914	-4.14772	-3.82261	-5.27683	-4.76184	-4.21778	-3.91233	-4.83023	-4.11046	-4.8775	-3.85997	-4.65528	-3.90288	-4.44162	-4.44411	-4.20167
1700086L19Rik	-3.95035	-4.02159	-4.39914	-4.14772	-3.82261	-5.27683	-4.76184	-4.21778	-3.91233	-4.83023	-4.11046	-4.8775	-3.85997	-4.65528	-3.90288	-4.44162	-4.44411	-4.20167
1700086O06Rik	-3.95035	-4.02159	1.5316	-4.14772	-3.82261	-0.753266	-4.76184	-4.21778	-3.91233	-2.5083	-4.11046	2.26205	-3.85997	-4.65528	-3.90288	-4.44162	-4.44411	-4.20167
1700088E04Rik	-3.95035	-4.02159	-4.39914	-4.14772	-3.82261	-5.27683	-4.76184	-0.669339	-3.91233	0.983292	-4.11046	2.20508	-3.85997	-4.65528	4.21534	-4.44162	-4.44411	-4.20167
1700091H14Rik	-3.95035	-4.02159	-4.39914	-4.14772	-3.82261	-5.27683	-4.76184	-4.21778	-3.91233	-4.83023	-4.11046	-4.8775	-3.85997	-4.65528	-3.90288	-4.44162	-4.44411	-4.20167
1700092C02Rik	-3.95035	-4.02159	-4.39914	-4.14772	-3.82261	-5.27683	-4.76184	-4.21778	-3.91233	-4.83023	-4.11046	-4.8775	-3.85997	-4.65528	-3.90288	-4.44162	-4.44411	-4.20167
1700092C10Rik	-3.95035	-4.02159	-4.39914	-4.14772	-3.82261	-5.27683	-4.76184	-4.21778	-3.91233	-4.83023	-4.11046	-4.8775	-3.85997	-4.65528	-3.90288	-4.44162	-4.44411	-4.20167
1700092E19Rik	-3.95035	-4.02159	-4.39914	-4.14772	-3.82261	-5.27683	-4.76184	-4.21778	-3.91233	-4.83023	-4.11046	-4.8775	-3.85997	-4.65528	-3.90288	-4.44162	-4.44411	-4.20167
1700092K14Rik	-3.95035	-4.02159	-4.39914	-4.14772	-3.82261	-5.27683	-4.76184	-4.21778	-3.91233	-4.83023	-4.11046	-4.8775	-3.85997	-4.65528	-3.90288	-4.44162	-4.44411	-4.20167
1700092M07Rik	-3.95035	-4.02159	1.66695	-4.14772	-3.82261	-5.27683	-4.76184	-4.21778	-3.91233	-4.83023	-4.11046	-3.29253	-3.85997	-4.65528	-3.90288	-4.44162	-4.44411	-4.20167
1700093K21Rik	-3.95035	-4.02159	-4.39914	-4.14772	-3.82261	-5.27683	-4.76184	-4.21778	-3.91233	-4.83023	-4.11046	-4.8775	-3.85997	-4.65528	-3.90288	1.44102	-4.44411	-4.20167
1700094D03Rik	5.53145	-0.562162	-2.07721	-2.56276	5.60993	3.51433	5.45854	5.62615	-1.10497	3.28351	-2.5255	3.74821	2.1624	2.00293	0.852008	4.08586	4.86195	1.77561
1700094J05Rik	-3.95035	-4.02159	-4.39914	-4.14772	-3.82261	1.66569	-4.76184	-4.21778	-3.91233	-0.437915	-4.11046	-4.8775	-3.85997	-4.65528	-3.90288	-4.44162	-4.44411	-4.20167
1700094M24Rik	-3.95035	-4.02159	-4.39914	-4.14772	-3.82261	-5.27683	-4.76184	-4.21778	-3.91233	-4.83023	-4.11046	-4.8775	-3.85997	-4.65528	-3.90288	-4.44162	-4.44411	-4.20167
1700095A21Rik	-3.95035	-4.02159	-4.39914	-4.14772	-3.82261	-5.27683	-4.76184	-4.21778	-3.91233	-4.83023	-4.11046	-4.8775	-3.85997	-4.65528	-3.90288	-4.44162	-4.44411	-4.20167
1700095B10Rik	-3.95035	6.848	-4.39914	-4.14772	-3.82261	-0.322632	-4.76184	-4.21778	-3.91233	-4.83023	-4.11046	-4.8775	-3.85997	-4.65528	-2.31792	-4.44162	-4.44411	-4.20167
1700096J18Rik	-3.95035	-4.02159	-4.39914	-4.14772	-3.82261	-2.9549	-4.76184	-4.21778	-3.91233	-4.83023	-4.11046	-1.41806	-3.85997	-4.65528	-3.90288	-4.44162	-4.44411	-4.20167
1700096K18Rik	-3.95035	-4.02159	-4.39914	-4.14772	2.44417	-0.0673747	-1.59192	-0.758344	-3.91233	0.455169	-4.11046	-1.41806	-3.85997	4.0065	-3.90288	-2.85666	-4.44411	0.321894
1700097N02Rik	-3.95035	-4.02159	-4.39914	-4.14772	-3.82261	-5.27683	-4.76184	-4.21778	-3.91233	-4.83023	-4.11046	-4.8775	-3.85997	-4.65528	-3.90288	-4.44162	-4.44411	-4.20167
1700100L14Rik	-3.95035	-4.02159	-4.39914	-4.14772	-3.82261	-5.27683	-4.76184	-4.21778	-3.91233	-4.83023	-4.11046	-4.8775	-3.85997	-4.65528	-3.90288	-4.44162	-4.44411	-4.20167
1700101E01Rik	-3.95035	-4.02159	-4.39914	-4.14772	-3.82261	-5.27683	-4.76184	-4.21778	-3.91233	-4.83023	-4.11046	-4.8775	-3.85997	-4.65528	-3.90288	-4.44162	-4.44411	-4.20167
1700101I11Rik	-3.95035	-4.02159	-4.39914	-4.14772	-3.82261	-5.27683	-4.76184	-4.21778	-3.91233	-4.83023	-4.11046	-2.07014	-3.85997	-4.65528	-3.90288	-4.44162	-4.44411	-4.20167
1700101O22Rik	-3.95035	-4.02159	-4.39914	-4.14772	-3.82261	-5.27683	-4.76184	-4.21778	-3.91233	-4.83023	-4.11046	-4.8775	-3.85997	-4.65528	-3.90288	-4.44162	-4.44411	-4.20167
1700102H20Rik	-3.95035	-4.02159	-4.39914	-4.14772	1.66924	-3.69187	-4.76184	-4.21778	-3.91233	-4.83023	-4.11046	-4.8775	-3.85997	-4.65528	-3.90288	-4.44162	-4.44411	-4.20167
1700102P08Rik	-3.95035	-4.02159	-4.39914	-4.14772	-3.82261	-2.1069	-4.76184	-4.21778	-3.91233	-4.83023	-4.11046	1.00515	-3.85997	-4.65528	-3.90288	-0.982187	-4.44411	-0.742236
1700104L18Rik	-3.95035	-4.02159	-4.39914	-4.14772	-3.82261	-5.27683	-4.76184	-4.21778	-3.91233	-4.83023	-4.11046	-4.8775	-3.85997	-4.65528	-3.90288	-4.44162	-4.44411	-4.20167
1700105P06Rik	-3.95035	-4.02159	-4.39914	-4.14772	-3.82261	-5.27683	-4.76184	-4.21778	-3.91233	-4.83023	-4.11046	-4.8775	-3.85997	-4.65528	-3.90288	-4.44162	-4.44411	-4.20167
1700106J16Rik	-3.95035	-4.02159	-4.39914	-4.14772	-3.82261	-5.27683	-4.76184	-4.21778	-3.91233	-4.83023	-4.11046	-4.8775	-3.85997	-4.65528	-3.90288	-4.44162	-4.44411	-4.20167
1700108F19Rik	-3.95035	-4.02159	-4.39914	-4.14772	-3.82261	-5.27683	-4.76184	-4.21778	-3.91233	-4.83023	-4.11046	-4.8775	-3.85997	-4.65528	-3.90288	-4.44162	-4.44411	-4.20167
1700108J01Rik	-3.95035	-4.02159	-4.39914	-4.14772	-3.82261	-5.27683	-4.76184	-4.21778	-3.91233	-4.83023	-4.11046	-4.8775	-3.85997	-4.65528	-3.90288	-4.44162	-4.44411	-4.20167
1700109G14Rik	-3.95035	-4.02159	-4.39914	-4.14772	-3.82261	-5.27683	-4.76184	-4.21778	-3.91233	-4.83023	-4.11046	-4.8775	-3.85997	-4.65528	-3.90288	-4.44162	-4.44411	-4.20167
1700109G15Rik	-3.95035	-4.02159	-4.39914	-4.14772	-3.82261	-5.27683	-4.76184	-4.21778	-3.91233	-4.83023	-4.11046	-4.8775	-3.85997	-4.65528	-3.90288	-4.44162	-4.44411	-4.20167
1700109H08Rik	-3.95035	-4.02159	-4.39914	-4.14772	-3.82261	-1.57639	-4.76184	-4.21778	-3.91233	-4.83023	-4.11046	-4.8775	-3.85997	-4.65528	1.2264	-4.44162	-4.44411	-4.20167
1700109I08Rik	-3.95035	-4.02159	-4.39914	-4.14772	-3.82261	-5.27683	-4.76184	-4.21778	-3.91233	-4.83023	-4.11046	-4.8775	-3.85997	-4.65528	-3.90288	-4.44162	-4.44411	-4.20167
1700109K24Rik	-3.95035	2.35345	-4.39914	-4.14772	-3.82261	-3.69187	-4.76184	-4.21778	-3.91233	-4.83023	-4.11046	-4.8775	-3.85997	-4.65528	-3.90288	-4.44162	-4.44411	-4.20167
1700110C19Rik	4.0212	-4.02159	-1.59179	2.11907	3.87087	2.22302	2.84549	0.991678	-3.91233	1.05241	-0.410022	1.99287	-3.85997	1.57354	5.05422	-0.193691	-2.12218	-0.742236
1700110I01Rik	4.05528	4.80813	3.37565	4.0666	2.74724	3.69184	3.63476	4.56686	0.175137	3.64144	3.08921	3.60228	4.05292	-1.19585	2.9173	-0.534728	3.99468	2.42769
1700110K17Rik	-3.95035	-4.02159	-4.39914	-4.14772	-3.82261	-5.27683	-4.76184	-4.21778	-3.91233	-4.83023	-4.11046	-4.8775	-3.85997	-4.65528	-3.90288	-4.44162	-4.44411	-4.20167
1700111N16Rik	-3.95035	-4.02159	-4.39914	-4.14772	-3.82261	-5.27683	-4.76184	-4.21778	-3.91233	-4.83023	-4.11046	-4.8775	-3.85997	-4.65528	-3.90288	-4.44162	-4.44411	-4.20167
1700112E06Rik	-2.36539	-4.02159	0.645254	4.13305	1.84981	2.93749	-0.674378	0.537112	-3.91233	2.15845	-4.11046	-2.55557	3.31994	4.75199	4.51075	0.843783	0.765345	-4.20167
1700112H15Rik	-3.95035	-4.02159	-4.39914	-4.14772	-3.82261	-5.27683	-4.76184	-4.21778	-3.91233	-4.83023	-4.11046	-4.8775	-3.85997	-4.65528	-3.90288	-4.44162	-4.44411	-4.20167
1700112J05Rik	-3.95035	-4.02159	-4.39914	-4.14772	-3.82261	-5.27683	-4.76184	-4.21778	-3.91233	-4.83023	-4.11046	-4.8775	-3.85997	-4.65528	-3.90288	-4.44162	-4.44411	-4.20167
1700113A16Rik	2.96852	-4.02159	5.7211	4.11437	3.75481	4.51921	3.94206	6.41975	3.87558	4.16695	4.44029	3.51052	3.52373	3.17127	0.852008	3.82048	2.47475	5.18419
1700113H08Rik	-3.95035	-4.02159	-4.39914	-4.14772	-3.82261	-5.27683	-4.76184	-4.21778	-3.91233	-4.83023	-4.11046	-4.8775	-3.85997	-4.65528	-3.90288	-4.44162	-4.44411	-4.20167
1700119H24Rik	-3.95035	-4.02159	-4.39914	-4.14772	-3.82261	-5.27683	-4.76184	-4.21778	-3.91233	-4.83023	-4.11046	-4.8775	-3.85997	-4.65528	-3.90288	-4.44162	-4.44411	-4.20167
1700120C14Rik	-3.95035	-4.02159	-4.39914	-4.14772	-3.82261	-5.27683	-4.76184	-4.21778	-3.91233	-4.83023	-4.11046	-4.8775	-3.85997	-4.65528	-2.31792	-4.44162	-4.44411	-4.20167
1700120E14Rik	-3.95035	-4.02159	-4.39914	-4.14772	-3.82261	-5.27683	-4.76184	-4.21778	-3.91233	-4.83023	-4.11046	-4.8775	-3.85997	-4.65528	-3.90288	-4.44162	-4.44411	-4.20167
1700120G07Rik	-3.95035	-4.02159	-4.39914	-4.14772	-3.82261	-5.27683	-4.76184	-4.21778	-3.91233	-4.83023	-4.11046	-4.8775	-3.85997	-4.65528	-3.90288	-4.44162	-4.44411	-4.20167
1700120K04Rik	-3.95035	-4.02159	-4.39914	-4.14772	-3.82261	-5.27683	-4.76184	-4.21778	-3.91233	-4.83023	-4.11046	-4.8775	-3.85997	-4.65528	-3.90288	-4.44162	-4.44411	-4.20167
1700121L16Rik	-3.95035	-4.02159	-4.39914	-4.14772	-3.82261	-5.27683	-4.76184	-4.21778	-3.91233	-4.83023	-4.11046	-4.8775	-3.85997	-4.65528	-3.90288	-4.44162	-4.44411	-4.20167
1700121N20Rik	-3.95035	-4.02159	-4.39914	-4.14772	-3.82261	-5.27683	-4.76184	-4.21778	-3.91233	-4.83023	-4.11046	-4.8775	-3.85997	-4.65528	-3.90288	-4.44162	-4.44411	-4.20167
1700122O11Rik	-3.95035	-4.02159	-4.39914	-4.14772	-3.82261	-5.27683	-4.76184	-4.21778	-3.91233	-4.83023	-4.11046	-4.8775	-3.85997	-4.65528	-3.90288	-4.44162	-4.44411	-4.20167
1700123I01Rik	-3.95035	-4.02159	-4.39914	-4.14772	-3.82261	-5.27683	-4.76184	-4.21778	-3.91233	-4.83023	-4.11046	-4.8775	-3.85997	-4.65528	-3.90288	-4.44162	-4.44411	-4.20167
1700123K08Rik	-3.95035	-4.02159	-4.39914	-4.14772	-3.82261	-5.27683	-4.76184	-4.21778	-3.91233	-4.83023	-4.11046	-4.8775	-3.85997	-4.65528	-3.90288	-4.44162	-4.44411	-4.20167
1700123L14Rik	-3.95035	-4.02159	-4.39914	-4.14772	-3.82261	-5.27683	-4.76184	-4.21778	-3.91233	-4.83023	-4.11046	-4.8775	-3.85997	-4.65528	-3.90288	-4.44162	-4.44411	-4.20167
1700123M08Rik	-3.95035	-4.02159	-4.39914	-4.14772	-3.82261	-5.27683	1.54194	0.640205	2.01841	-4.83023	-4.11046	-3.29253	-3.85997	-3.07032	-1.58095	-4.44162	-4.44411	-4.20167
1700123O12Rik	-3.95035	-4.02159	-4.39914	-4.14772	-3.82261	-5.27683	-4.76184	-4.21778	-3.91233	-4.83023	-4.11046	-4.8775	-3.85997	-4.65528	-3.90288	-4.44162	-4.44411	-4.20167
1700123O20Rik	1.93229	4.14331	1.31015	2.39144	5.01344	2.20441	-0.513913	5.80598	3.2944	2.73415	4.0843	5.59217	4.25377	2.60343	-2.31792	6.23591	3.20694	5.11999
1700123O21Rik	-3.95035	-4.02159	-4.39914	-4.14772	-3.82261	-5.27683	-4.76184	-4.21778	-3.91233	-4.83023	-4.11046	-4.8775	-3.85997	-4.65528	-3.90288	-4.44162	-4.44411	-4.20167
1700124L16Rik	-3.95035	-4.02159	-4.39914	-4.14772	-3.82261	-5.27683	-4.76184	-4.21778	-3.91233	-4.83023	-4.11046	-2.55557	-3.85997	-4.65528	-3.90288	-4.44162	-4.44411	-4.20167
1700125G02Rik	-3.95035	-4.02159	-4.39914	-4.14772	-3.82261	-5.27683	-4.76184	-4.21778	-3.91233	-4.83023	-4.11046	-4.8775	-3.85997	-4.65528	-3.90288	-4.44162	-4.44411	-4.20167
1700125G22Rik	-3.95035	-4.02159	-4.39914	-4.14772	-3.82261	-5.27683	-4.76184	-4.21778	-3.91233	-4.83023	-4.11046	-4.8775	-3.85997	-4.65528	-3.90288	-4.44162	-4.44411	-4.20167
1700125H03Rik	-3.95035	-4.02159	-4.39914	-4.14772	-3.82261	-5.27683	-4.76184	-4.21778	-3.91233	-4.83023	-4.11046	-4.8775	-3.85997	-4.65528	-3.90288	-4.44162	-4.44411	-4.20167
1700125H20Rik	-3.95035	-4.02159	-4.39914	-4.14772	-3.82261	-5.27683	-4.76184	-4.21778	-3.91233	-4.83023	-4.11046	-4.8775	-3.85997	-4.65528	-3.90288	-4.44162	-4.44411	-4.20167
1700126H18Rik	-3.95035	-4.02159	-4.39914	-4.14772	-3.82261	-5.27683	-4.76184	-4.21778	-3.91233	-4.83023	-4.11046	-4.8775	-3.85997	-4.65528	-3.90288	-4.44162	-4.44411	-4.20167
1700128A07Rik	-3.95035	-4.02159	-4.39914	-4.14772	-3.82261	-5.27683	-4.76184	-4.21778	-3.91233	-4.83023	-4.11046	-4.8775	-3.85997	-4.65528	-3.90288	-4.44162	-4.44411	-4.20167
1700128F08Rik	-3.95035	-4.02159	-4.39914	-4.14772	-3.82261	-5.27683	-4.76184	-4.21778	-3.91233	-4.83023	-4.11046	-4.8775	-3.85997	-4.65528	-3.90288	-4.44162	-4.44411	-4.20167
1700129C05Rik	-3.95035	-4.02159	-4.39914	-4.14772	-3.82261	-5.27683	-4.76184	-4.21778	-3.91233	-4.83023	-4.11046	-4.8775	-3.85997	-4.65528	-3.90288	-4.44162	-4.44411	-4.20167
1810006J02Rik	-3.95035	-4.02159	-4.39914	-4.14772	-3.82261	-5.27683	-4.76184	-4.21778	-3.91233	-4.83023	-4.11046	-4.8775	-3.85997	-4.65528	-3.90288	-4.44162	-4.44411	-4.20167
1810007C17Rik	-3.95035	-4.02159	-4.39914	-4.14772	-3.82261	-5.27683	-4.76184	-4.21778	-3.91233	-4.83023	-4.11046	-4.8775	-3.85997	-4.65528	-3.90288	-4.44162	-4.44411	-4.20167
1810007D17Rik	-3.95035	-4.02159	-4.39914	-4.14772	-3.82261	-5.27683	-4.76184	-4.21778	-3.91233	-4.83023	-4.11046	-4.8775	-3.85997	-4.65528	-3.90288	-4.44162	-4.44411	-4.20167
1810008I18Rik	-3.95035	-4.02159	-4.39914	-4.14772	-3.82261	-5.27683	-4.76184	-4.21778	-3.91233	-4.83023	-4.11046	-4.8775	-3.85997	-4.65528	-3.90288	-4.44162	-4.44411	-4.20167
1810009A15Rik	-3.95035	-2.43663	-4.39914	-0.977796	4.4948	2.8981	-4.76184	4.81289	3.91422	5.5781	-2.5255	2.85721	-3.85997	4.14885	4.5442	2.52417	-1.63675	-4.20167
1810009J06Rik	-3.95035	-4.02159	-4.39914	-4.14772	-3.82261	-5.27683	-4.76184	-4.21778	-3.91233	-4.83023	-4.11046	-4.8775	-3.85997	-4.65528	-3.90288	-4.44162	-4.44411	-4.20167
1810010D01Rik	-3.95035	-4.02159	-4.39914	-4.14772	-3.82261	-5.27683	-4.76184	-4.21778	-3.91233	-4.83023	-4.11046	-4.8775	-3.85997	-4.65528	-3.90288	-4.44162	-4.44411	-4.20167
1810010H24Rik	-2.36539	-4.02159	-0.49225	-4.14772	-2.23765	-1.0289	-4.76184	1.13978	-3.91233	2.50068	-4.11046	-2.55557	-3.85997	3.22124	4.61676	-4.44162	-2.85915	-4.20167
1810011H11Rik	6.96478	3.76631	6.7436	6.73569	6.20667	6.19637	6.40746	7.54253	0.945655	6.55401	5.52797	6.33257	5.97134	7.6425	5.95666	6.10045	6.15859	7.9382
1810011O10Rik	-0.490916	-4.02159	-4.39914	-4.14772	6.12721	-2.9549	-4.76184	4.29398	-3.91233	3.98675	-4.11046	-3.29253	-3.85997	2.28723	-3.90288	-2.85666	-4.44411	-4.20167
1810012K16Rik	-3.95035	-4.02159	-4.39914	-4.14772	-3.82261	-5.27683	-4.76184	-4.21778	-3.91233	-4.83023	-4.11046	-4.8775	-3.85997	-4.65528	-3.90288	-4.44162	-4.44411	-4.20167
1810013A23Rik	-3.95035	-4.02159	-4.39914	-4.14772	-3.82261	-5.27683	-4.76184	-4.21778	-3.91233	-3.24527	-4.11046	-4.8775	-3.85997	-4.65528	-3.90288	-4.44162	-4.44411	-4.20167
1810013L24Rik	4.00965	3.90322	6.65546	6.92843	3.70877	6.07024	8.5048	6.57745	7.37712	7.44502	5.39138	6.04211	6.21283	6.10044	6.14015	6.76112	4.51879	7.23764
1810014B01Rik	-2.36539	1.0228	-4.39914	5.17646	2.71654	1.38138	-4.76184	1.80459	-3.91233	3.54045	2.19332	2.9234	-2.27501	-4.65528	-3.90288	-2.11969	4.28041	-2.61671
1810018F18Rik	-3.95035	-4.02159	-4.39914	-4.14772	-3.82261	-5.27683	-4.76184	-4.21778	-3.91233	-4.83023	-4.11046	-4.8775	-3.85997	-4.65528	-3.90288	-4.44162	-4.44411	-4.20167
1810019D21Rik	-3.95035	-4.02159	-4.39914	-4.14772	-3.82261	-5.27683	-4.76184	5.69362	-3.91233	-4.83023	-4.11046	-4.8775	-3.85997	-4.65528	-3.90288	-4.44162	-4.44411	-4.20167
1810020O05Rik	-3.95035	-4.02159	-4.39914	-4.14772	-3.82261	-5.27683	-4.76184	-4.21778	-3.91233	-4.83023	-4.11046	-4.8775	-3.85997	-4.65528	-3.90288	-4.44162	-4.44411	-4.20167
1810021B22Rik	-3.95035	-4.02159	-4.39914	1.34413	-3.82261	-0.884511	-4.76184	-4.21778	-3.91233	0.379221	-0.410022	-4.8775	-3.85997	-4.65528	-3.90288	1.39127	1.70564	-4.20167
1810022K09Rik	-2.36539	0.501968	-4.39914	2.26167	-3.82261	3.07632	4.16	-0.517336	4.72067	1.47355	-2.5255	3.67325	3.57466	1.88388	-1.09552	2.03411	-4.44411	5.74816
1810024B03Rik	-3.95035	-4.02159	-4.39914	-4.14772	-3.82261	-5.27683	3.84918	-4.21778	-3.91233	-4.83023	-4.11046	-4.8775	-3.85997	-4.65528	-3.90288	-4.44162	-4.44411	-4.20167
1810026B05Rik	5.81359	3.03672	7.03898	5.46308	3.22658	5.31469	3.8867	6.79834	4.86634	4.82078	5.42104	4.97144	6.62108	4.30495	5.68696	7.53689	4.85377	5.00183
1810026J23Rik	6.37271	2.28219	2.7198	2.79479	5.03225	4.94355	-4.76184	-4.21778	5.41635	4.77895	3.71609	5.94985	-2.27501	5.12772	6.23539	-1.63426	1.82268	-4.20167
1810030O07Rik	3.68628	5.23344	2.10865	5.17646	-2.23765	5.05521	5.99388	6.16916	5.85089	3.21962	6.36223	6.54088	7.7264	5.4467	6.3175	4.04622	4.48367	6.16137
1810032O08Rik	3.85055	-4.02159	-4.39914	-4.14772	-3.82261	-2.9549	-4.76184	3.67097	-3.91233	-1.66031	5.38739	3.97737	2.73994	2.26358	-2.31792	-0.193691	2.42626	-1.87974
1810034E14Rik	-3.95035	-4.02159	-4.39914	-4.14772	-3.82261	2.08949	-4.76184	-4.21778	-3.91233	-4.83023	-4.11046	-4.8775	-3.85997	-4.65528	-3.90288	-4.44162	-2.85915	-0.501228
1810037I17Rik	-2.36539	-2.43663	1.5316	5.50153	0.700948	4.29113	1.74595	5.292	4.46705	3.88744	5.81583	2.69993	-0.690046	4.36986	4.02193	3.90268	6.2292	2.17337
1810043G02Rik	5.81949	6.15956	-4.39914	-4.14772	5.11697	3.52083	4.29615	5.45642	1.92056	3.84572	2.07936	3.69615	2.1624	-3.07032	3.98586	-4.44162	-4.44411	3.23296
1810043H04Rik	-3.95035	-4.02159	-4.39914	-4.14772	-3.82261	2.12405	1.26053	2.70109	-0.742401	-1.3708	3.10871	1.46235	3.81951	-4.65528	-3.90288	-1.27169	-4.44411	4.37953
1810044D09Rik	-3.95035	-4.02159	-4.39914	-4.14772	-3.82261	-5.27683	-4.76184	-4.21778	-3.91233	-4.83023	-4.11046	-4.8775	-3.85997	-4.65528	1.30657	-4.44162	-4.44411	-4.20167
1810046K07Rik	-3.95035	-4.02159	-4.39914	-4.14772	-3.82261	-5.27683	-4.76184	-4.21778	-3.91233	-4.83023	-4.11046	-4.8775	-3.85997	-4.65528	-3.90288	-4.44162	-4.44411	-4.20167
1810053B23Rik	-3.95035	-4.02159	-4.39914	-4.14772	-3.82261	-5.27683	-4.76184	-4.21778	-3.91233	-4.83023	-4.11046	-4.8775	-3.85997	-4.65528	-3.90288	-4.44162	-4.44411	-4.20167
1810055G02Rik	-3.95035	-4.02159	-4.39914	-2.56276	5.08127	2.71753	-4.76184	-4.21778	-3.91233	3.29389	-4.11046	-0.23364	-3.85997	-4.65528	-3.90288	-4.44162	-4.44411	-4.20167
1810058I24Rik	-3.95035	0.226334	2.47122	-2.56276	1.13158	3.40617	5.92203	0.174542	6.32727	1.61271	6.0557	4.24921	6.34826	-4.65528	-3.90288	3.58629	-4.44411	3.49182
1810062G17Rik	-3.95035	-4.02159	-4.39914	-4.14772	-3.82261	-5.27683	-4.76184	-4.21778	-3.91233	-4.83023	-4.11046	-4.8775	-3.85997	-4.65528	-3.90288	-4.44162	-4.44411	-4.20167
1810062O18Rik	1.77757	-4.02159	-4.39914	-4.14772	-3.82261	-5.27683	-4.76184	-4.21778	-3.91233	-1.12979	-4.11046	-4.8775	-3.85997	-4.65528	-3.90288	-4.44162	-4.44411	-4.20167
1810064F22Rik	-3.95035	-4.02159	-4.39914	-4.14772	-3.82261	-5.27683	-4.76184	-4.21778	-3.91233	-4.83023	-4.11046	-4.8775	-3.85997	-4.65528	-3.90288	-4.44162	-4.44411	-4.20167
1810065E05Rik	-3.95035	-4.02159	-4.39914	-4.14772	-3.82261	-5.27683	-4.76184	-4.21778	-3.91233	-4.83023	-4.11046	-4.8775	-3.85997	-4.65528	-3.90288	-4.44162	-4.44411	-4.20167
2010001E11Rik	-3.95035	-4.02159	-4.39914	-4.14772	-3.82261	-5.27683	-4.76184	-4.21778	-3.91233	-4.83023	-4.11046	-4.8775	-3.85997	-4.65528	-3.90288	-4.44162	-4.44411	-4.20167
2010002M12Rik	-3.95035	-4.02159	-4.39914	-4.14772	-3.82261	-5.27683	-4.76184	-4.21778	-3.91233	-4.83023	-4.11046	-4.8775	-3.85997	-4.65528	-3.90288	-4.44162	-4.44411	-4.20167
2010003K11Rik	-3.95035	-4.02159	-4.39914	-4.14772	-3.82261	-5.27683	-4.76184	-4.21778	-3.91233	-4.83023	-4.11046	-4.8775	-3.85997	-4.65528	-3.90288	-4.44162	-4.44411	-4.20167
2010005H15Rik	-3.95035	-4.02159	-4.39914	-4.14772	-3.82261	-5.27683	-4.76184	-4.21778	-3.91233	-4.83023	-4.11046	-4.8775	-3.85997	-4.65528	-3.90288	-4.44162	-4.44411	-4.20167
2010009K17Rik	-3.95035	-4.02159	-4.39914	-4.14772	-3.82261	-5.27683	-4.76184	-0.758344	-3.91233	0.66162	-4.11046	-4.8775	-3.85997	-4.65528	-3.90288	-4.44162	-4.44411	-4.20167
2010010A06Rik	-3.95035	-4.02159	-4.39914	-4.14772	-3.82261	-5.27683	-4.76184	-4.21778	-3.91233	-4.83023	-4.11046	-4.8775	-3.85997	-4.65528	-3.90288	-4.44162	-4.44411	-4.20167
2010012O05Rik	-3.95035	7.73705	4.50474	-4.14772	-1.01526	5.45873	4.86569	-4.21778	-3.91233	3.76596	2.26458	4.07379	-2.27501	0.702272	1.30657	2.90711	-2.12218	3.95315
2010015L04Rik	3.97435	4.97559	4.71663	3.78892	6.62664	5.42659	4.59391	4.1344	7.84631	5.92692	2.638	5.5021	4.0409	5.67	7.86377	6.37389	7.25329	6.24397
2010016I18Rik	-3.95035	-4.02159	-4.39914	-4.14772	-3.82261	-5.27683	-4.76184	-4.21778	-3.91233	-4.83023	-4.11046	-4.8775	-3.85997	-4.65528	-3.90288	-4.44162	-4.44411	-4.20167
2010106C02Rik	-3.95035	-4.02159	-4.39914	-4.14772	-3.82261	-0.232434	-4.76184	-4.21778	-3.91233	-2.5083	-1.30311	-4.8775	3.45291	-4.65528	-3.90288	-4.44162	-4.44411	2.27407
2010106E10Rik	-3.95035	-4.02159	-4.39914	-4.14772	-3.82261	-5.27683	-4.76184	-4.21778	-3.91233	-4.83023	-4.11046	-4.8775	-3.85997	-4.65528	-3.90288	-4.44162	-4.44411	-4.20167
2010107E04Rik	7.28746	-2.43663	3.56086	2.64669	6.79302	3.227	1.89637	4.91922	4.65373	3.07063	4.15163	1.31233	4.81599	3.89547	-1.58095	3.91153	2.45071	0.0462599
2010107G12Rik	-3.95035	-4.02159	-4.39914	-4.14772	-3.82261	-5.27683	-4.76184	-4.21778	-3.91233	-4.83023	-4.11046	-4.8775	-3.85997	-4.65528	-3.90288	-4.44162	-4.44411	-4.20167
2010107G23Rik	-3.95035	-4.02159	-4.39914	-4.14772	-3.82261	-2.9549	-4.76184	-4.21778	-3.91233	-4.83023	-4.11046	-4.8775	-3.85997	-4.65528	-3.90288	-4.44162	-4.44411	-4.20167
2010109A12Rik	-3.95035	-4.02159	-4.39914	-4.14772	-3.82261	-5.27683	-4.76184	-4.21778	-3.91233	-4.83023	-4.11046	-4.8775	-3.85997	-4.65528	-3.90288	-4.44162	-4.44411	-4.20167
2010109I03Rik	-3.95035	-4.02159	-0.939709	-4.14772	-3.82261	-1.8174	-4.76184	5.47047	-1.10497	-0.186377	-4.11046	2.47123	-1.53804	-4.65528	5.45687	-4.44162	-4.44411	5.93916
2010111I01Rik	4.12111	8.23727	6.78139	2.0811	0.821242	5.41055	1.92466	-0.758344	3.75301	4.9593	-0.203571	4.63228	-1.53804	2.79593	6.54936	5.41169	-0.984677	4.86711
2010204K13Rik	-3.95035	-4.02159	-4.39914	-4.14772	-3.82261	-5.27683	-0.85495	-4.21778	-3.91233	-1.3708	-4.11046	-4.8775	-3.85997	-4.65528	-3.90288	-4.44162	-4.44411	-4.20167
2010300C02Rik	-3.95035	-4.02159	-4.39914	-4.14772	4.09028	2.34522	-3.17688	-0.310885	-3.91233	-4.83023	-4.11046	-1.41806	2.02267	-3.07032	-3.90288	-4.44162	-4.44411	-4.20167
2010308F09Rik	-3.95035	-4.02159	-4.39914	-4.14772	-3.82261	-5.27683	-4.76184	-4.21778	-3.91233	-4.83023	-4.11046	-4.8775	-3.85997	-4.65528	-3.90288	-4.44162	-4.44411	-4.20167
2010310C07Rik	-3.95035	3.19757	-4.39914	-4.14772	-3.82261	-2.1069	-4.76184	-4.21778	-3.91233	-4.83023	-4.11046	-4.8775	-3.85997	-4.65528	-3.90288	-4.44162	-4.44411	-4.20167
2010315B03Rik	6.13844	0.0658693	1.38222	1.40687	0.425313	4.39028	-0.238279	-1.41042	5.0792	4.28611	5.59517	5.4297	-2.27501	5.18864	4.8148	5.34791	1.57826	1.8207
2010320M18Rik	2.23948	-1.69967	-2.81418	-4.14772	3.97829	2.20699	3.11468	-2.63281	-3.91233	-4.83023	4.40917	1.83675	-2.27501	-4.65528	-3.90288	-2.85666	-4.44411	-0.114205
2200002D01Rik	-3.95035	-4.02159	-4.39914	-4.14772	-3.82261	-5.27683	-4.76184	-4.21778	-3.91233	-4.83023	-4.11046	-4.8775	-3.85997	-4.65528	-3.90288	-4.44162	-4.44411	-4.20167
2200002J24Rik	-3.95035	-4.02159	-4.39914	-4.14772	-3.82261	-5.27683	-4.76184	-4.21778	-3.91233	-4.83023	-4.11046	-4.8775	-3.85997	-4.65528	-3.90288	-4.44162	-4.44411	-4.20167
2210010C04Rik	-3.95035	-4.02159	-4.39914	-4.14772	-3.82261	-5.27683	-4.76184	-4.21778	-3.91233	-4.83023	-4.11046	-4.8775	-3.85997	-4.65528	-3.90288	-4.44162	-4.44411	-4.20167
2210011C24Rik	-3.95035	-4.02159	-4.39914	-4.14772	-3.82261	-5.27683	-4.76184	-4.21778	-3.91233	-4.83023	-4.11046	-4.8775	-3.85997	-4.65528	-3.90288	-4.44162	-4.44411	-4.20167
2210013O21Rik	4.71143	5.88379	0.730143	0.71026	4.82484	2.12405	3.726	0.991678	-0.452894	3.54915	2.87822	2.11119	-1.53804	2.37814	3.25699	3.44712	7.65359	0.19065
2210015D19Rik	4.94144	-4.02159	4.11261	5.68042	4.68121	2.86783	-4.76184	1.06763	1.13207	-1.3708	-4.11046	2.37989	-3.85997	5.30617	6.16724	-0.741179	2.24239	-4.20167
2210016F16Rik	0.441969	8.04416	-0.151213	3.10967	3.43477	4.12192	5.839	-4.21778	4.16982	3.60022	-4.11046	4.63623	0.227492	2.69345	4.71551	1.7872	4.86195	2.45654
2210016L21Rik	-3.95035	-1.69967	2.17072	6.55185	1.84981	3.01319	6.63101	4.89857	4.35914	3.38409	4.90356	3.65778	5.70418	-2.33335	-2.31792	2.21659	1.53317	-4.20167
2210018M11Rik	5.83265	7.96887	5.60789	5.89257	4.29113	5.60199	5.90438	6.63006	7.27193	6.01604	4.58651	5.92421	4.78027	5.80722	6.6197	7.11824	6.41775	4.63438
2210019I11Rik	-3.95035	-4.02159	-4.39914	-4.14772	-3.82261	-5.27683	-4.76184	-4.21778	-3.91233	-4.83023	-4.11046	-4.8775	-3.85997	-4.65528	-3.90288	-4.44162	-4.44411	-4.20167
2210039B01Rik	-3.95035	-4.02159	-4.39914	-4.14772	-3.82261	-5.27683	-4.76184	-4.21778	-3.91233	-4.83023	-4.11046	-4.8775	-3.85997	-4.65528	-3.90288	-4.44162	-4.44411	-4.20167
2210404O09Rik	-3.95035	-1.69967	-4.39914	-1.82579	-3.82261	-2.46947	-4.76184	-4.21778	-3.91233	-1.66031	-4.11046	0.737213	-2.27501	-4.65528	-3.90288	-4.44162	-4.44411	-4.20167
2210407C18Rik	-3.95035	-4.02159	-4.39914	-4.14772	-3.82261	-5.27683	-4.76184	-4.21778	-3.91233	-4.83023	-4.11046	-4.8775	-3.85997	-4.65528	-3.90288	-4.44162	-4.44411	-4.20167
2210408F21Rik	-3.95035	-4.02159	-4.39914	-4.14772	-3.82261	-2.1069	-4.76184	4.87234	-3.91233	-2.5083	-2.5255	-2.07014	-3.85997	-4.65528	-3.90288	-4.44162	-4.44411	-2.61671
2210408I21Rik	-3.95035	-2.43663	-4.39914	1.63364	-3.82261	2.62404	0.96608	1.27408	1.64226	5.75379	4.86968	-0.485179	-2.27501	2.63934	-0.732954	0.984646	1.1706	5.9645
2210409D07Rik	-3.95035	-4.02159	-4.39914	-4.14772	-3.82261	-5.27683	-4.76184	-4.21778	-3.91233	-4.83023	-4.11046	-4.8775	-3.85997	-4.65528	-3.90288	-4.44162	-4.44411	-4.20167
2210409E12Rik	-3.95035	-4.02159	-4.39914	-4.14772	-3.82261	-5.27683	-4.76184	-4.21778	-3.91233	-4.83023	-4.11046	-4.8775	-3.85997	-4.65528	-3.90288	-4.44162	-4.44411	-4.20167
2210414B05Rik	-3.95035	-4.02159	-4.39914	-4.14772	-3.82261	-5.27683	-4.76184	-4.21778	-3.91233	-4.83023	-4.11046	-4.8775	-3.85997	-4.65528	-3.90288	-4.44162	-4.44411	-4.20167
2210416O15Rik	-3.95035	-4.02159	-4.39914	-4.14772	-3.82261	-5.27683	-4.76184	-4.21778	-3.91233	-4.83023	-4.11046	-4.8775	-3.85997	-4.65528	-3.90288	-4.44162	-4.44411	-4.20167
2210417A02Rik	-3.95035	-4.02159	-4.39914	1.46699	5.07523	-5.27683	-2.43991	-4.21778	-3.91233	0.951127	-4.11046	-2.07014	-3.85997	0.554174	-3.90288	-4.44162	-2.12218	-4.20167
2210420H20Rik	-3.95035	-4.02159	-4.39914	-4.14772	-3.82261	-5.27683	-4.76184	-4.21778	-3.91233	-4.83023	-4.11046	-4.8775	-3.85997	-4.65528	-3.90288	-4.44162	-4.44411	-4.20167
2300002M23Rik	-3.95035	-4.02159	-4.39914	-4.14772	-3.82261	-5.27683	-4.76184	-4.21778	-3.91233	-4.83023	-4.11046	-4.8775	-3.85997	-4.65528	-3.90288	-4.44162	-4.44411	-4.20167
2300003K06Rik	-3.95035	-4.02159	-4.39914	-4.14772	-3.82261	-5.27683	-4.76184	-4.21778	-3.91233	-4.83023	-4.11046	-4.8775	-3.85997	-4.65528	-3.90288	-4.44162	-4.44411	-4.20167
2300005B03Rik	-3.95035	-4.02159	-4.39914	-4.14772	-3.82261	-5.27683	-4.76184	-4.21778	-3.91233	-4.83023	-4.11046	-4.8775	-3.85997	-4.65528	-3.90288	-4.44162	-4.44411	-4.20167
2300009A05Rik	-3.95035	-4.02159	-4.39914	-2.56276	-3.82261	-1.0289	-1.95449	-4.21778	-3.91233	1.1005	-4.11046	0.548768	-3.85997	-4.65528	-3.90288	-4.44162	-4.44411	-1.39431
2310001H17Rik	-3.95035	-4.02159	-4.39914	-4.14772	-3.82261	-5.27683	-4.76184	-4.21778	-3.91233	-4.83023	-4.11046	-4.8775	-3.85997	3.90314	-3.90288	-4.44162	-4.44411	-4.20167
2310001K24Rik	-3.95035	-4.02159	-4.39914	-4.14772	-3.82261	-5.27683	-4.76184	-4.21778	-3.91233	-4.83023	-4.11046	-4.8775	-3.85997	-4.65528	-3.90288	-4.44162	-4.44411	-4.20167
2310002D06Rik	-3.95035	-4.02159	-4.39914	-4.14772	-3.82261	-5.27683	-4.76184	-4.21778	-3.91233	-4.83023	-4.11046	-4.8775	-3.85997	-4.65528	-3.90288	-4.44162	-4.44411	-4.20167
2310002F09Rik	-3.95035	-4.02159	-4.39914	-4.14772	-3.82261	-5.27683	-4.76184	-4.21778	-3.91233	-4.83023	-4.11046	-4.8775	-3.85997	-4.65528	-3.90288	-4.44162	-4.44411	-4.20167
2310002J15Rik	-3.95035	-4.02159	-4.39914	-4.14772	-3.82261	-5.27683	-4.76184	-4.21778	-3.91233	-4.83023	-4.11046	-4.8775	-3.85997	-4.65528	-3.90288	-4.44162	-4.44411	-4.20167
2310002L09Rik	-3.95035	-4.02159	-4.39914	-4.14772	-3.82261	-5.27683	-4.76184	-4.21778	-3.91233	-4.83023	-4.11046	-4.8775	-3.85997	-4.65528	-3.90288	-4.44162	-4.44411	-4.20167
2310003H01Rik	2.23948	5.33376	-1.22922	-4.14772	2.7773	1.13256	-4.76184	6.11426	-3.91233	0.527319	-0.940537	-0.0195155	-0.400539	5.53331	-2.31792	-2.85666	5.39667	0.321894
2310005A03Rik	-3.95035	-4.02159	-4.39914	-4.14772	-3.82261	-5.27683	-4.76184	-4.21778	-3.91233	-4.83023	-4.11046	-4.8775	-3.85997	-4.65528	-3.90288	-4.44162	-4.44411	-4.20167
2310005E17Rik	-3.95035	-4.02159	-4.39914	-4.14772	-3.82261	-5.27683	-4.76184	-4.21778	-3.91233	-4.83023	-4.11046	-4.8775	-3.85997	-4.65528	-3.90288	-4.44162	-4.44411	-4.20167
2310005G13Rik	-3.95035	-4.02159	-4.39914	-4.14772	-3.82261	-5.27683	-4.76184	-4.21778	-3.91233	-4.83023	-4.11046	-4.8775	-3.85997	-4.65528	-3.90288	-4.44162	-4.44411	-4.20167
2310007B03Rik	-3.95035	-4.02159	-4.39914	-4.14772	-3.82261	-5.27683	-4.76184	-4.21778	-3.91233	-4.83023	-4.11046	-4.8775	-3.85997	-4.65528	-3.90288	-4.44162	-4.44411	-4.20167
2310007L24Rik	-3.95035	-4.02159	-4.39914	-4.14772	-3.82261	-5.27683	-4.76184	-4.21778	-3.91233	-4.83023	-4.11046	-4.8775	-3.85997	-4.65528	-3.90288	-4.44162	-4.44411	-4.20167
2310008N11Rik	-3.95035	-4.02159	-4.39914	-4.14772	-3.82261	-5.27683	-4.76184	-4.21778	-3.91233	-4.83023	-4.11046	-4.8775	-3.85997	-4.65528	-3.90288	-4.44162	-4.44411	-4.20167
2310009A05Rik	-3.95035	4.14331	5.34401	3.53176	0.700948	1.61799	-4.76184	-4.21778	-3.91233	2.63737	-4.11046	3.09405	3.23806	-3.07032	5.61479	1.17309	2.42626	-4.20167
2310009B15Rik	-3.95035	-4.02159	-4.39914	-1.82579	-3.82261	-5.27683	2.00634	-4.21778	-3.91233	3.04628	-4.11046	-4.8775	-3.85997	-1.19585	-3.90288	-4.44162	-2.85915	4.34136
2310010J17Rik	-3.95035	-4.02159	-4.39914	-4.14772	-3.82261	-2.1069	-4.76184	-2.63281	-3.91233	-4.83023	-4.11046	-4.8775	-3.85997	0.899309	-3.90288	0.843783	-4.44411	2.39825
2310011J03Rik	1.47592	7.78616	6.12148	3.05195	-2.23765	3.92039	2.62186	3.40428	-2.32736	5.02308	4.60721	2.81599	-3.85997	4.72193	5.63045	4.30322	2.81328	0.656313
2310014L17Rik	-3.95035	-4.02159	-4.39914	-4.14772	-3.82261	0.00857418	-4.76184	6.12319	-3.91233	-4.83023	-4.11046	-4.8775	-3.85997	-4.65528	-3.90288	-4.44162	-4.44411	-4.20167
2310015A10Rik	7.73045	6.22989	1.43375	3.86909	3.97829	5.70688	2.9035	5.42066	6.2812	3.9146	5.32208	5.96407	7.33294	5.13751	4.80793	2.87126	7.08971	7.40705
2310015B20Rik	-3.95035	-4.02159	-4.39914	-4.14772	-3.82261	-5.27683	-4.76184	-4.21778	-3.91233	-4.83023	-4.11046	-4.8775	-3.85997	-4.65528	-3.90288	-4.44162	-4.44411	-4.20167
2310015D24Rik	-3.95035	-4.02159	-4.39914	-4.14772	-3.82261	-5.27683	-4.76184	-4.21778	-3.91233	-4.83023	-4.11046	-4.8775	-3.85997	-4.65528	-3.90288	-4.44162	-4.44411	-4.20167
2310016D03Rik	-3.95035	-4.02159	-4.39914	-4.14772	-3.82261	-5.27683	-4.76184	-4.21778	-3.91233	-4.83023	-4.11046	-4.8775	-3.85997	-4.65528	-3.90288	-4.44162	-4.44411	-4.20167
2310020H05Rik	-3.95035	-4.02159	-4.39914	-4.14772	-3.82261	-5.27683	-4.76184	-4.21778	-3.91233	-4.83023	-4.11046	-4.8775	-3.85997	-4.65528	-3.90288	-4.44162	-4.44411	-4.20167
2310022A10Rik	5.64024	4.67537	3.41464	-4.14772	-3.82261	2.20699	4.06153	3.43328	-3.91233	5.72914	3.79041	0.677092	-2.27501	2.93718	-3.90288	0.602775	1.99884	-0.501228
2310022B05Rik	-2.36539	0.0658693	4.26264	-4.14772	2.94557	1.46464	-3.17688	3.26604	0.842562	5.46324	5.04182	2.01732	-2.27501	1.36709	1.45467	-4.44162	3.11813	5.66407
2310030A07Rik	-3.95035	-4.02159	-4.39914	-4.14772	-3.82261	-5.27683	-4.76184	-4.21778	-3.91233	-4.83023	-4.11046	-4.8775	-3.85997	-4.65528	-3.90288	-4.44162	-4.44411	-4.20167
2310030G06Rik	-3.95035	-4.02159	-4.39914	-4.14772	-3.82261	-5.27683	-4.76184	-4.21778	-3.91233	-4.83023	-4.11046	-4.8775	-3.85997	-4.65528	-3.90288	-4.44162	-4.44411	-4.20167
2310033P09Rik	4.95955	3.77931	2.34233	6.21969	4.50382	3.60276	2.20394	-4.21778	-0.742401	-0.0753452	4.26023	4.32463	7.3354	3.97043	4.9644	-1.27169	0.765345	6.12589
2310034C09Rik	-3.95035	-4.02159	-4.39914	-4.14772	-3.82261	-5.27683	-4.76184	-4.21778	-3.91233	-4.83023	-4.11046	-4.8775	-3.85997	-4.65528	-3.90288	-4.44162	-4.44411	-4.20167
2310034G01Rik	-3.95035	-4.02159	-4.39914	-4.14772	3.82844	-5.27683	-4.76184	-4.21778	-3.91233	-4.83023	-4.11046	-4.8775	-3.85997	-4.65528	-3.90288	-4.44162	-4.44411	-4.20167
2310034O05Rik	-3.95035	-4.02159	-4.39914	-4.14772	-3.82261	-5.27683	-4.76184	-4.21778	-3.91233	-4.83023	-4.11046	-4.8775	-3.85997	-4.65528	-3.90288	-4.44162	-4.44411	-4.20167
2310035C23Rik	2.1994	2.87322	6.7048	6.56738	4.98796	6.39339	5.52933	5.06067	7.6389	5.49732	6.93051	5.97191	4.13438	6.83808	6.59995	6.35198	5.82852	7.06921
2310036O22Rik	5.85862	6.82781	4.74297	4.8994	4.45816	6.02638	4.38027	6.47484	4.44082	5.32838	3.42092	5.93548	2.32985	4.70885	3.42804	5.9258	7.25763	5.63596
2310039H08Rik	-3.95035	5.8898	4.3524	2.00203	3.61201	2.79463	-4.76184	-1.04785	-3.91233	3.81001	3.35714	1.59824	7.08474	-4.65528	-3.90288	-4.44162	-4.44411	-0.501228
2310039L15Rik	-3.95035	-4.02159	-4.39914	-4.14772	-3.82261	-5.27683	-4.76184	-4.21778	-3.91233	-4.83023	-4.11046	-4.8775	-3.85997	-4.65528	-3.90288	-4.44162	-4.44411	-4.20167
2310040G24Rik	-2.36539	-4.02159	-4.39914	-1.34037	5.16891	1.16612	-4.76184	-2.63281	-3.91233	4.72244	0.4131	2.26205	3.39742	-4.65528	-3.90288	5.14897	4.87556	-4.20167
2310042E22Rik	-3.95035	-4.02159	-4.39914	-4.14772	-3.82261	-5.27683	-4.76184	-4.21778	-3.91233	-4.83023	-4.11046	-4.8775	-3.85997	-4.65528	-3.90288	-4.44162	-4.44411	-4.20167
2310043L19Rik	-3.95035	-4.02159	-4.39914	-4.14772	-3.82261	-5.27683	-4.76184	-4.21778	-3.91233	-4.83023	-4.11046	-4.8775	-3.85997	-4.65528	-3.90288	-4.44162	-4.44411	-4.20167
2310043O21Rik	-3.95035	-4.02159	-4.39914	-4.14772	-3.82261	-5.27683	-4.76184	-4.21778	-3.91233	-4.83023	-4.11046	-4.8775	-3.85997	-4.65528	-3.90288	-4.44162	-4.44411	-4.20167
2310045N01Rik	-3.95035	5.94563	4.19705	1.5802	-0.652689	4.39383	2.37771	1.20849	3.61906	-1.66031	-2.5255	3.60228	-3.85997	-0.95484	-3.90288	-2.85666	0.413873	-1.87974
2310047M10Rik	-3.95035	1.59312	7.13468	4.79772	-3.82261	3.5273	-2.43991	1.06763	2.82914	5.3534	-1.30311	0.794929	4.9949	0.770985	-1.09552	-2.11969	-4.44411	6.36153
2310050C09Rik	-3.95035	-4.02159	-4.39914	-4.14772	-3.82261	-5.27683	-4.76184	-4.21778	-3.91233	-4.83023	-4.11046	-4.8775	-3.85997	-4.65528	-3.90288	-4.44162	-4.44411	-4.20167
2310057J18Rik	-3.95035	-4.02159	-4.39914	-4.14772	-3.82261	-5.27683	-4.76184	-4.21778	-3.91233	-4.83023	-4.11046	-4.8775	-3.85997	-4.65528	-3.90288	-4.44162	-4.44411	-4.20167
2310057M21Rik	2.79112	-4.02159	-4.39914	5.66124	1.03537	3.07632	0.447613	1.71296	1.97032	2.62098	2.70972	1.49754	-3.85997	0.554174	3.67455	-4.44162	-2.12218	-1.39431
2310057N15Rik	-3.95035	-4.02159	-4.39914	-4.14772	-3.82261	-5.27683	-4.76184	-4.21778	-3.91233	-4.83023	-4.11046	-4.8775	-3.85997	-4.65528	-3.90288	-4.44162	-4.44411	-4.20167
2310061I04Rik	1.00385	-1.69967	3.28034	-4.14772	1.90531	1.79999	0.523561	-4.21778	-2.32736	5.40219	-4.11046	3.81947	2.79824	2.82854	2.9173	-0.741179	-2.12218	1.2246
2310061J03Rik	-3.95035	-4.02159	-4.39914	-4.14772	-3.82261	1.34698	-4.76184	-4.21778	-3.91233	-4.83023	2.30198	-0.0195155	4.24876	0.179634	-1.09552	-4.44162	-2.09361	-0.501228
2310061N02Rik	-3.95035	-4.02159	-4.39914	-4.14772	-3.82261	-5.27683	-4.76184	-4.21778	-3.91233	-4.83023	-4.11046	-4.8775	-3.85997	-4.65528	-3.90288	-4.44162	-4.44411	-4.20167
2310065F04Rik	-3.95035	-4.02159	-4.39914	-4.14772	-3.82261	-5.27683	-4.76184	-4.21778	-3.91233	-4.83023	-4.11046	-4.8775	-3.85997	-4.65528	-3.90288	-4.44162	-4.44411	-4.20167
2310067B10Rik	2.45904	0.0658693	3.29435	5.69306	2.62033	4.8691	0.0961402	2.01104	3.03019	5.01369	-1.78853	3.52764	8.70203	6.28356	3.67455	7.10286	4.09117	4.0698
2310068J16Rik	-3.95035	-4.02159	-4.39914	-4.14772	-3.82261	-5.27683	-4.76184	-4.21778	-3.91233	-1.3708	-4.11046	-4.8775	-3.85997	-4.65528	-3.90288	-4.44162	-4.44411	-4.20167
2310069B03Rik	-3.95035	-4.02159	-4.39914	-4.14772	-3.82261	-5.27683	-4.76184	-4.21778	-3.91233	-4.83023	-4.11046	-4.8775	-3.85997	-4.65528	-3.90288	-4.44162	-4.44411	-4.20167
2310069G16Rik	-3.95035	-4.02159	-4.39914	-4.14772	-3.82261	-5.27683	-4.76184	-4.21778	-3.91233	-4.83023	-4.11046	-4.8775	-3.85997	-4.65528	-3.90288	-4.44162	-4.44411	-4.20167
2310079G19Rik	-3.95035	-4.02159	-4.39914	-4.14772	-3.82261	-5.27683	-4.76184	-4.21778	-3.91233	-4.83023	-4.11046	-4.8775	-3.85997	-4.65528	-3.90288	-4.44162	-4.44411	-4.20167
2310081J21Rik	-3.95035	-4.02159	-4.39914	-4.14772	-3.82261	-5.27683	-4.76184	-4.21778	-3.91233	-4.83023	-4.11046	-4.8775	-3.85997	-4.65528	-3.90288	-4.44162	-4.44411	-4.20167
2410002F23Rik	-1.62842	3.57086	-4.39914	4.96341	2.24348	2.62404	5.05354	-2.63281	-3.91233	2.71666	-2.5255	3.03539	4.05292	3.14562	5.37557	3.27948	8.59875	-1.87974
2410003L11Rik	-3.95035	-4.02159	-4.39914	-4.14772	-3.82261	-5.27683	-4.76184	-4.21778	-3.91233	-4.83023	-4.11046	-4.8775	-3.85997	-4.65528	-3.90288	-4.44162	-4.44411	-4.20167
2410004B18Rik	1.77757	3.37929	3.06847	2.77114	-3.82261	1.54335	2.8004	0.640205	-3.91233	3.15276	-4.11046	3.41252	-3.85997	1.27546	5.08864	5.04421	3.27699	1.90686
2410004I01Rik	-3.95035	-4.02159	-4.39914	-4.14772	-3.82261	-5.27683	-4.76184	-4.21778	-3.91233	-4.83023	-4.11046	-4.8775	-3.85997	-4.65528	-3.90288	-4.44162	-4.44411	-4.20167
2410004N09Rik	4.20447	0.0658693	2.34233	4.44847	2.7773	3.04058	6.10929	-0.130313	-2.32736	2.30932	0.281856	3.90714	-2.27501	-2.33335	1.76955	-0.534728	5.1124	-4.20167
2410004P03Rik	-3.95035	-4.02159	-4.39914	-4.14772	-3.82261	-5.27683	-4.76184	-4.21778	-3.91233	-4.83023	-4.11046	-4.8775	-3.85997	-4.65528	-3.90288	-4.44162	-4.44411	-4.20167
2410006H16Rik	2.84407	1.86105	6.67834	5.67405	2.55243	4.73859	2.05834	3.95715	6.98628	4.81543	2.60378	3.79139	-0.690046	5.05035	4.40546	0.202237	-1.27418	3.73497
2410007B07Rik	-3.95035	-4.02159	-4.39914	-4.14772	-3.82261	-5.27683	-4.76184	-4.21778	-3.91233	-4.83023	-4.11046	-4.8775	-3.85997	-4.65528	-3.90288	-4.44162	-4.44411	-4.20167
2410012E07Rik	-3.95035	-4.02159	-4.39914	-4.14772	-3.82261	-5.27683	-4.76184	-4.21778	-3.91233	-4.83023	-4.11046	-4.8775	-3.85997	-4.65528	-3.90288	-4.44162	-4.44411	-4.20167
2410012M07Rik	-3.95035	-4.02159	-4.39914	-4.14772	-3.82261	-5.27683	-4.76184	-4.21778	-3.91233	-4.83023	-4.11046	-4.8775	-3.85997	-4.65528	-3.90288	-4.44162	-4.44411	-4.20167
2410015M20Rik	-3.95035	7.30652	-4.39914	4.98927	-3.82261	2.51107	4.29615	4.33297	-1.5904	2.7472	-4.11046	2.48883	-3.85997	1.94463	0.955102	5.64186	-4.44411	4.36439
2410016O06Rik	-2.36539	4.01733	1.75061	3.01215	0.425313	2.3305	-4.76184	-0.758344	2.49707	2.76222	1.09899	1.72242	-3.85997	3.10627	8.45109	3.10528	3.2906	6.33264
2410017I17Rik	-3.95035	-4.02159	-4.39914	-4.14772	-3.82261	-5.27683	-4.76184	-4.21778	-3.91233	-4.83023	-4.11046	-4.8775	-3.85997	-4.65528	-3.90288	-4.44162	-4.44411	-4.20167
2410018L13Rik	-3.95035	-4.02159	-4.39914	-4.14772	-3.82261	-5.27683	-4.76184	-4.21778	-3.91233	-4.83023	-4.11046	-4.8775	-3.85997	-4.65528	-3.90288	-4.44162	-4.44411	-4.20167
2410021H03Rik	-3.95035	-4.02159	-4.39914	-4.14772	-3.82261	0.395597	-4.76184	-4.21778	-3.91233	-4.83023	-4.11046	2.17779	2.90821	-4.65528	-3.90288	-4.44162	-4.44411	-4.20167
2410076I21Rik	3.34427	-4.02159	-0.311678	-4.14772	-3.82261	2.23887	-0.513913	-4.21778	-3.91233	1.39859	2.45939	-0.23364	-1.53804	1.12608	1.58897	-0.193691	-4.44411	3.19921
2410088K16Rik	-3.95035	-4.02159	-4.39914	-4.14772	-3.82261	-5.27683	-4.76184	-4.21778	-3.91233	-4.83023	-4.11046	-4.8775	-3.85997	-4.65528	-3.90288	-4.44162	-4.44411	-4.20167
2410089E03Rik	5.01832	2.69265	5.58243	7.29367	4.20529	4.16404	5.6251	5.28804	7.591	3.69724	4.17031	5.91448	4.43005	5.70557	2.43697	1.33974	3.46878	0.656313
2410114N07Rik	-3.95035	-4.02159	-4.39914	-4.14772	-3.82261	-5.27683	-4.76184	-4.21778	-3.91233	-4.83023	-4.11046	-4.8775	-3.85997	-4.65528	-3.90288	-4.44162	-4.44411	-4.20167
2410124H12Rik	-3.95035	-4.02159	-4.39914	-4.14772	-3.82261	-5.27683	-4.76184	-4.21778	-3.91233	-4.83023	-4.11046	-4.8775	-3.85997	-4.65528	-3.90288	-4.44162	-4.44411	-4.20167
2410127L17Rik	-3.95035	1.59312	1.90464	-4.14772	-3.82261	1.90308	-4.76184	2.08601	5.10727	0.784477	0.747519	3.81947	2.32985	2.21508	-0.202439	2.00132	3.13332	-2.61671
2410131K14Rik	0.907633	-4.02159	-4.39914	3.74102	-3.82261	2.83691	-4.76184	-4.21778	-3.91233	0.29905	-4.11046	1.35132	-3.85997	-4.65528	-3.90288	-4.44162	-0.196181	4.82347
2410137M14Rik	-3.95035	-4.02159	-4.39914	-4.14772	-3.82261	-5.27683	-4.76184	-4.21778	-3.91233	-4.83023	-4.11046	-4.8775	-3.85997	-4.65528	-3.90288	-4.44162	-4.44411	-4.20167
2410141K09Rik	-3.95035	-4.02159	-4.39914	-4.14772	-3.82261	-5.27683	-4.76184	-4.21778	-3.91233	-4.83023	-4.11046	-4.8775	-3.85997	-4.65528	-3.90288	-4.44162	-4.44411	-4.20167
2500004C02Rik	-3.95035	4.19273	4.70677	3.54577	2.91885	0.556062	-0.85495	3.97698	6.25132	0.214161	-0.940537	4.06208	4.58711	-1.48535	-3.90288	0.602775	6.13049	6.07096
2510002D24Rik	-3.95035	7.03978	-1.59179	-2.56276	-2.23765	1.71186	-3.17688	0.826618	2.53062	3.14131	3.16566	1.53189	-3.85997	0.702272	-2.31792	6.11393	6.05673	1.15588
2510003E04Rik	5.11305	5.39837	-0.151213	5.33811	2.71654	3.91052	5.48014	-2.63281	-1.10497	4.17258	5.37537	4.93468	0.0469199	3.23346	0.345048	0.767835	3.90019	4.31797
2510009E07Rik	5.94901	9.20768	5.60789	6.51673	5.23538	5.87355	7.37483	7.29546	6.2812	5.9188	7.41457	6.56078	6.22617	5.80927	6.65267	7.08341	4.72331	4.64696
2510039O18Rik	7.26093	9.36359	6.77141	3.96602	5.6141	6.65058	8.65298	5.21477	8.18076	5.82887	6.50517	5.554	7.15753	4.63243	6.26328	7.54458	6.05275	7.74341
2510049J12Rik	-3.95035	-4.02159	-4.39914	-1.82579	-3.82261	4.40089	-4.76184	-4.21778	-3.91233	-4.83023	-4.11046	-4.8775	-3.85997	-4.65528	-3.90288	-4.44162	-4.44411	-4.20167
2610001J05Rik	0.441969	2.71987	5.27505	6.73569	4.14893	5.14208	3.94897	7.04608	0.945655	-0.306671	5.03165	3.02337	7.45348	3.13262	6.13741	3.9464	-1.27418	3.86979
2610002J02Rik	1.54151	-2.43663	-1.59179	5.06417	5.48345	2.79463	4.48371	-2.63281	-3.91233	2.98355	3.04941	-0.0195155	4.85084	3.11951	3.08581	2.40387	-2.85915	0.442189
2610002M06Rik	-2.36539	-2.43663	0.810313	-2.56276	3.88475	4.33604	4.07421	3.69511	4.02431	2.93132	3.62425	3.28741	9.12747	5.46236	4.80102	4.69024	0.913444	3.07446
2610005L07Rik	6.88208	7.91151	5.95537	6.93164	7.77673	7.54273	7.67281	7.65794	8.23004	7.19002	6.80439	7.6233	6.46024	6.72505	7.29609	6.65481	8.55345	7.40402
2610008E11Rik	2.58881	0.733294	5.79685	2.0811	6.2846	4.55131	4.03582	-1.04785	1.70238	6.50124	6.26349	4.35372	6.63488	7.357	3.44585	6.2752	5.36486	7.9137
2610015P09Rik	4.04401	-4.02159	4.01449	4.21422	-0.652689	4.70474	-3.17688	5.522	-3.91233	4.32711	4.29468	1.99287	-3.85997	-4.65528	0.184584	-2.85666	4.45374	-4.20167
2610016A17Rik	-3.95035	-4.02159	-4.39914	-4.14772	-3.82261	-5.27683	-4.76184	-4.21778	-3.91233	-4.83023	-4.11046	-4.8775	-3.85997	-4.65528	-3.90288	-4.44162	-4.44411	-4.20167
2610018G03Rik	-0.249908	-4.02159	3.60648	-4.14772	-3.82261	1.16612	-4.76184	-4.21778	-3.91233	1.35959	-4.11046	1.53189	-3.85997	-4.65528	3.08581	0.602775	-4.44411	-4.20167
2610020C07Rik	-2.36539	-2.43663	2.82003	5.34541	5.59469	2.21053	-4.76184	1.27408	4.54973	3.6894	3.47164	4.12369	4.08207	4.25149	-1.0873	-0.979566	1.67856	0.569161
2610020H08Rik	-2.36539	-1.69967	0.124421	-4.14772	2.06003	1.88304	-1.95449	3.48958	-3.91233	-1.12979	-4.11046	1.99287	-2.27501	0.836573	5.5586	1.62447	-0.537218	-4.20167
2610027K06Rik	-3.95035	-4.02159	-4.39914	-4.14772	-3.82261	-2.1069	-4.76184	-1.04785	-3.91233	-4.83023	-2.50639	-3.29253	-3.85997	-4.65528	-3.90288	-4.44162	-4.44411	-4.20167
2610028E06Rik	-3.95035	-4.02159	-4.39914	-4.14772	-3.82261	-5.27683	-4.76184	-4.21778	-3.91233	-4.83023	-4.11046	-4.8775	-3.85997	-4.65528	-3.90288	-4.44162	-4.44411	-4.20167
2610028H24Rik	-3.95035	-4.02159	-4.39914	-4.14772	-3.82261	-5.27683	-4.76184	-4.21778	-3.91233	-4.83023	-4.11046	-4.8775	-3.85997	-4.65528	-3.90288	-4.44162	-4.44411	-4.20167
2610034B18Rik	-3.95035	-4.02159	-4.39914	-4.14772	-3.82261	-1.0289	-4.76184	-4.21778	-3.91233	-4.83023	-4.11046	1.91692	-3.85997	-4.65528	-3.90288	-4.44162	-4.44411	-4.20167
2610034M16Rik	-3.95035	-4.02159	-4.39914	-4.14772	-3.82261	-5.27683	-4.76184	-4.21778	-3.91233	-4.83023	-4.11046	-4.8775	-3.85997	-4.65528	-3.90288	-4.44162	-4.44411	-4.20167
2610035D17Rik	-3.95035	-4.02159	8.17285	-4.14772	-3.82261	2.69472	-4.76184	-4.21778	-2.32736	3.62509	-4.11046	1.46235	-3.85997	-1.84792	-3.90288	-4.44162	-4.44411	2.13818
2610035F20Rik	-3.95035	-4.02159	-4.39914	-4.14772	-3.82261	-5.27683	-4.76184	-4.21778	-3.91233	-4.83023	-4.11046	-4.8775	-3.85997	-4.65528	-3.90288	-4.44162	-4.44411	-4.20167
2610037D02Rik	-3.95035	-4.02159	-4.39914	-4.14772	-3.82261	-5.27683	-4.76184	-4.21778	-3.91233	-4.83023	-4.11046	-4.8775	-3.85997	-4.65528	-3.90288	-4.44162	-4.44411	-4.20167
2610044O15Rik8	-3.95035	0.733294	4.57527	-4.14772	-2.23765	2.99463	3.66861	-4.21778	5.14567	1.70893	4.44796	3.79846	-3.85997	5.72302	-3.90288	0.202237	-2.85915	-4.20167
2610100L16Rik	-3.95035	-4.02159	-4.39914	-4.14772	-3.82261	-5.27683	-4.76184	-2.63281	-3.91233	-4.83023	-4.11046	-4.8775	-3.85997	-4.65528	-3.90288	-4.44162	-4.44411	-4.20167
2610203C20Rik	-3.95035	-4.02159	-4.39914	-4.14772	-2.23765	-1.8174	-0.369523	-4.21778	-3.91233	-4.83023	-4.11046	0.955393	-3.85997	-4.65528	-3.90288	-4.44162	-2.85915	-4.20167
2610203C22Rik	1.60424	3.81761	3.10071	1.78302	4.29113	3.59662	5.3558	2.49647	4.27255	2.04013	6.43932	4.45566	5.96499	3.75835	4.09147	7.5804	6.56502	2.61851
2610206C17Rik	-3.95035	-4.02159	-4.39914	-4.14772	-3.82261	-5.27683	-4.76184	-4.21778	-3.91233	-4.83023	-4.11046	-4.8775	-3.85997	-4.65528	-3.90288	-4.44162	-4.44411	-4.20167
2610207O16Rik	-0.0434575	-4.02159	-4.39914	-4.14772	-3.82261	-1.36994	-4.76184	-4.21778	-3.91233	-4.83023	-4.11046	-4.8775	-3.85997	-4.65528	-3.90288	-4.44162	-4.44411	-4.20167
2610301B20Rik	5.4988	-2.43663	-4.39914	2.39144	-0.122174	1.79999	3.2097	2.52369	5.25509	-1.3708	-4.11046	3.64998	0.99801	1.53454	0.955102	5.73705	6.94552	-4.20167
2610305D13Rik	-3.95035	-4.02159	-4.39914	-4.14772	-3.82261	-5.27683	-4.76184	-4.21778	-3.91233	-4.83023	-4.11046	-4.8775	-3.85997	-4.65528	-3.90288	-4.44162	-4.44411	-4.20167
2610306M01Rik	-3.95035	-4.02159	-4.39914	-4.14772	-3.82261	1.51759	-4.76184	2.55041	-3.91233	2.63737	-4.11046	3.49319	-1.53804	-4.65528	3.27703	-4.44162	-4.44411	5.67331
2610307P16Rik	-3.95035	-4.02159	2.14002	-4.14772	-3.82261	-2.1069	-4.76184	-4.21778	-3.91233	-4.83023	-4.11046	-4.8775	-3.85997	-4.65528	-3.90288	-4.44162	-4.44411	-4.20167
2610316D01Rik	-3.95035	-4.02159	-4.39914	-4.14772	-3.82261	-5.27683	-4.76184	1.13978	-3.91233	-4.83023	-4.11046	-4.8775	-3.85997	-4.65528	-3.90288	-4.44162	-4.44411	-4.20167
2610318N02Rik	-3.95035	-4.02159	-4.39914	-4.14772	-3.82261	-5.27683	-4.76184	-4.21778	-3.91233	-4.83023	-4.11046	-4.8775	-3.85997	-4.65528	-3.90288	-4.44162	-4.44411	-4.20167
2610507B11Rik	8.21613	8.78355	8.46987	6.0847	8.95608	7.0777	5.97202	7.69922	8.12556	7.34625	7.88778	6.98553	9.33186	6.69068	7.76645	7.14944	7.5321	7.65203
2610507I01Rik	4.33042	5.32935	5.92841	6.29626	4.84627	4.47304	3.43292	5.45994	5.22467	5.17679	4.55132	2.77356	7.93891	7.748	1.87848	4.69024	4.55307	3.85903
2610524H06Rik	-3.95035	-4.02159	-4.39914	-4.14772	-3.82261	-3.69187	-4.76184	-4.21778	-3.91233	-3.24527	2.57604	-4.8775	-3.85997	-4.65528	-3.90288	-4.44162	-4.44411	-4.20167
2610528A11Rik	4.21456	-4.02159	4.4743	3.9764	3.31694	3.88556	-4.76184	6.91729	-3.91233	3.81001	2.54775	0.407906	-3.85997	-3.07032	-2.31792	2.4532	-4.44411	-2.61671
2610528J11Rik	-3.95035	-4.02159	-4.39914	-4.14772	-3.82261	-5.27683	-4.76184	-4.21778	-3.91233	-4.83023	-4.11046	-4.8775	-3.85997	-4.65528	-3.90288	-4.44162	-4.44411	-4.20167
2700029M09Rik	-2.36539	-2.43663	3.87232	5.64507	1.60365	4.44256	4.58023	3.00139	2.90785	3.63329	6.06571	4.10264	4.9506	4.12936	5.28447	-0.354156	1.66442	5.33943
2700038G22Rik	-3.95035	-2.43663	-2.81418	-4.14772	-3.82261	-0.232434	3.24378	-4.21778	-3.91233	-2.5083	-4.11046	-0.353935	3.84739	4.2243	0.620683	2.24488	-4.44411	-4.20167
2700046A07Rik	-3.95035	-4.02159	-4.39914	-4.14772	-3.82261	-5.27683	-4.76184	-4.21778	-3.91233	-4.83023	-4.11046	-4.8775	-3.85997	-4.65528	-3.90288	-4.44162	-4.44411	-4.20167
2700046G09Rik	1.33505	-2.43663	0.555056	-1.82579	3.45351	2.0719	3.24378	3.57013	5.36612	-4.83023	-4.11046	1.18859	5.02573	-2.33335	4.76601	-4.44162	1.82268	2.27407
2700049A03Rik	7.16014	7.56572	2.28736	6.11084	3.56109	5.28637	5.61862	6.20324	1.97032	4.9979	4.87538	5.7473	5.44609	4.05553	5.14424	4.62716	3.51589	2.85361
2700054A10Rik	2.64956	-4.02159	-4.39914	-4.14772	-3.82261	-5.27683	-4.76184	-4.21778	-3.91233	-4.83023	-4.11046	-4.8775	-3.85997	-4.65528	-3.90288	-4.44162	-4.44411	-4.20167
2700060E02Rik	4.8857	6.76924	4.37215	4.07261	5.19892	4.97043	4.99712	5.54211	5.61554	5.32744	6.2109	5.24941	4.54967	3.5291	5.73552	3.87643	3.13332	7.09639
2700062C07Rik	-3.95035	7.30427	1.4835	4.73797	1.38684	4.02923	1.71389	1.84831	-3.91233	2.5185	-0.410022	4.6043	4.36403	3.33907	4.45906	2.99301	6.00194	3.19921
2700069I18Rik	-3.95035	-4.02159	-4.39914	-4.14772	-3.82261	-5.27683	-4.76184	-4.21778	-3.91233	-4.83023	-4.11046	-4.8775	-3.85997	-4.65528	-3.90288	-4.44162	-4.44411	-4.20167
2700070H01Rik	-3.95035	-4.02159	-4.39914	-4.14772	3.02288	2.37422	-4.76184	-4.21778	-3.91233	-4.83023	-4.11046	-4.8775	-3.85997	-4.65528	-2.31792	-4.44162	-4.44411	3.24954
2700081O15Rik	1.98039	-4.02159	6.86472	6.77635	5.19698	5.0993	3.3519	5.1019	5.70054	4.89599	7.27917	3.08251	-2.27501	4.33624	4.93317	1.39127	1.62198	-0.742236
2700086A05Rik	-3.95035	-4.02159	-4.39914	-4.14772	-3.82261	-5.27683	-4.76184	-4.21778	-3.91233	-4.83023	-4.11046	-4.8775	-3.85997	-4.65528	-3.90288	-4.44162	-4.44411	-4.20167
2700089E24Rik	6.50189	2.0445	1.27328	4.54228	2.15467	4.61647	2.27158	5.78925	9.63589	4.22776	4.05445	4.83847	6.19124	3.99936	3.97364	7.32615	3.43241	6.61612
2700089I24Rik	-3.95035	-4.02159	-4.39914	-4.14772	-3.82261	-5.27683	-4.76184	-4.21778	-3.91233	-4.83023	-4.11046	-4.8775	-3.85997	-4.65528	-3.90288	-4.44162	-4.44411	-4.20167
2700094K13Rik	-3.95035	-2.43663	-4.39914	3.66606	2.58678	0.789261	4.44517	-1.89585	-1.10497	1.27829	-4.11046	3.78428	-3.85997	-4.65528	-3.90288	-4.44162	-4.44411	-0.294777
2700097O09Rik	-1.62842	5.63125	3.50173	-4.14772	6.00234	1.94234	-4.76184	-0.517336	-3.91233	-0.437915	1.91191	1.809	0.99801	3.35034	-3.90288	-2.85666	-4.44411	-4.20167
2700099C18Rik	-3.95035	-4.02159	-4.39914	-4.14772	-3.82261	-2.46947	-3.17688	-4.21778	-3.91233	0.379221	-4.11046	3.05914	-3.85997	-4.65528	-3.90288	-4.44162	-4.44411	-4.20167
2810001G20Rik	-3.95035	-4.02159	4.4743	5.31785	-3.82261	2.68317	-4.76184	-4.21778	-3.91233	0.0277483	-1.78853	1.05324	-3.85997	1.49447	2.81137	2.24488	-4.44411	-2.61671
2810002D19Rik	-2.36539	-4.02159	5.16119	1.91837	-3.82261	3.25065	0.910585	4.20429	3.61906	-2.02288	-4.11046	4.53825	-3.85997	2.23954	1.45467	-2.11969	4.698	-4.20167
2810004N23Rik	1.09405	-1.69967	5.82124	5.15834	-3.82261	3.50781	2.15702	-0.130313	-1.5904	4.30676	-4.11046	4.26461	3.19531	3.0242	5.86696	-2.11969	-2.12218	-4.20167
2810006K23Rik	-1.62842	4.52915	2.98456	-2.56276	2.19975	5.91361	-0.369523	5.64176	6.13888	3.9544	4.47825	4.52977	-1.05262	1.82045	-3.90288	-2.85666	3.75065	7.19226
2810007J24Rik	-3.95035	-4.02159	-4.39914	-4.14772	-3.82261	-5.27683	-4.76184	-4.21778	-3.91233	-4.83023	-4.11046	-4.8775	-3.85997	-4.65528	-3.90288	-4.44162	-4.44411	-4.20167
2810008D09Rik	4.39395	7.89017	2.39528	0.375841	6.42887	4.31001	3.59131	3.64641	7.33025	3.65761	2.26458	4.0324	-0.690046	3.38364	4.22124	6.43259	5.8812	7.14761
2810013P06Rik	5.34197	3.67189	6.55869	-4.14772	1.95875	4.80132	4.10544	0.826618	-0.742401	4.10346	5.0214	4.46458	-2.27501	4.48683	-2.31792	4.66952	-0.051791	-1.03174
2810021J22Rik	2.61951	-4.02159	-2.81418	0.607166	-2.23765	4.4996	-2.43991	-1.41042	0.335602	-2.02288	1.38139	2.37989	3.80537	2.58312	-2.31792	5.38652	3.62735	1.2246
2810025M15Rik	4.4116	-2.43663	4.4743	1.63364	2.55243	3.51433	3.52818	3.88551	5.66699	4.43421	2.7599	5.27606	7.85385	4.47658	3.25699	5.6551	5.64997	6.81723
2810029C07Rik	-3.95035	-4.02159	-4.39914	-4.14772	-3.82261	-5.27683	-4.76184	-4.21778	-3.91233	-4.83023	-4.11046	-4.8775	-3.85997	-4.65528	-3.90288	5.32491	-4.44411	-4.20167
2810032G03Rik	-3.95035	-4.02159	-4.39914	-4.14772	-3.82261	-5.27683	-4.76184	-4.21778	-3.91233	-4.83023	-4.11046	-4.8775	-3.85997	-4.65528	-3.90288	-4.44162	-4.44411	-4.20167
2810047C21Rik1	-2.36539	-4.02159	-4.39914	6.07024	0.932273	1.23097	4.40558	-4.21778	-3.91233	3.27306	0.281856	-0.790034	2.8815	-1.48535	-3.90288	-2.85666	-2.85915	-4.20167
2810049E08Rik	-3.95035	-4.02159	-4.39914	-4.14772	-3.82261	-5.27683	-4.76184	-4.21778	-3.91233	-4.83023	-4.11046	-4.8775	-3.85997	-4.65528	-3.90288	-4.44162	-4.44411	-4.20167
2810055G20Rik	6.41269	4.70292	2.28736	4.78597	4.25953	4.65834	6.11851	-4.21778	6.27626	5.29001	5.67254	5.43652	3.55788	4.0624	0.345048	7.1485	3.10279	4.31009
2810403A07Rik	7.3597	7.37019	6.97861	8.19907	4.96202	7.01693	4.71592	5.14636	8.95592	6.05623	6.46413	6.91	3.01039	7.39423	5.48298	5.2361	4.59207	7.69201
2810403D21Rik	-3.95035	-4.02159	-4.39914	-4.14772	-3.82261	-5.27683	-2.43991	-4.21778	-3.91233	-4.83023	-4.11046	-1.17706	-3.85997	-4.65528	-3.90288	-4.44162	-4.44411	-4.20167
2810404M03Rik	-3.95035	-4.02159	-4.39914	-4.14772	-3.82261	-5.27683	-4.76184	-4.21778	-3.91233	-4.83023	-4.11046	-4.8775	-3.85997	-4.65528	-3.90288	-4.44162	-4.44411	-4.20167
2810405F15Rik	-3.95035	-4.02159	-4.39914	-4.14772	-3.82261	-5.27683	-4.76184	-4.21778	-3.91233	-4.83023	-4.11046	-4.8775	-3.85997	-4.65528	-3.90288	-4.44162	-4.44411	-4.20167
2810408A11Rik	-3.95035	-4.02159	-4.39914	-4.14772	-3.82261	-5.27683	-4.76184	-4.21778	-3.91233	-4.83023	-4.11046	-4.8775	-3.85997	-4.65528	-3.90288	-4.44162	-4.44411	-4.20167
2810408I11Rik	-3.95035	-4.02159	-4.39914	2.67246	-3.82261	-5.27683	-4.76184	-4.21778	-3.91233	-4.83023	-4.11046	-4.8775	-3.85997	-4.65528	-3.90288	-4.44162	-4.44411	-4.20167
2810408M09Rik	4.94144	-4.02159	0.730143	3.91297	-3.82261	3.52213	1.1689	1.06763	-3.91233	4.31697	3.54059	4.6828	1.49758	-3.07032	3.73375	6.22242	3.42008	-4.20167
2810410L24Rik	-3.95035	-4.02159	-4.39914	-4.14772	-3.82261	-5.27683	-4.76184	-4.21778	-3.91233	-4.83023	-4.11046	-4.8775	-3.85997	-4.65528	-3.90288	-4.44162	-4.44411	-4.20167
2810417H13Rik	-3.95035	-1.69967	6.02398	-4.14772	-3.82261	1.43742	-4.76184	-4.21778	-1.5904	-3.24527	-4.11046	2.52338	-3.85997	-4.65528	-3.90288	-4.44162	-4.44411	-4.20167
2810428I15Rik	7.81494	1.70633	6.47814	2.29522	-3.82261	2.86783	2.8004	-2.63281	1.97032	1.96418	3.91744	3.61034	-0.690046	1.91458	4.25194	2.40387	5.60438	4.2204
2810429I04Rik	-3.95035	-4.02159	-4.39914	-4.14772	-2.23765	-1.8174	-4.76184	-4.21778	-3.91233	-2.5083	-4.11046	-0.122609	-3.85997	-4.65528	-3.90288	0.202237	0.413873	-4.20167
2810433D01Rik	-3.95035	-4.02159	-4.39914	-4.14772	-3.82261	-5.27683	-4.76184	-4.21778	-3.91233	-4.83023	-4.11046	-4.8775	-3.85997	-4.65528	-3.90288	-4.44162	-4.44411	-4.20167
2810442I21Rik	-3.95035	-4.02159	-4.39914	-4.14772	-3.82261	-5.27683	-4.76184	-4.21778	-3.91233	-4.83023	-4.11046	-4.8775	-3.85997	-4.65528	-3.90288	-4.44162	-4.44411	-4.20167
2810442N19Rik	-3.95035	-4.02159	-4.39914	-4.14772	-3.82261	-5.27683	-4.76184	-4.21778	-3.91233	-4.83023	-4.11046	-4.8775	-3.85997	-4.65528	-3.90288	-4.44162	-4.44411	-4.20167
2810454H06Rik	-3.95035	-4.02159	-4.39914	-4.14772	-3.82261	-1.57639	-4.76184	2.52369	-3.91233	1.6455	-4.11046	4.15317	-3.85997	-4.65528	-3.90288	-4.44162	-4.44411	-1.39431
2810459M11Rik	-3.95035	-4.02159	-4.39914	-4.14772	-3.82261	-5.27683	-4.76184	-4.21778	-3.91233	-4.83023	-4.11046	-4.8775	-3.85997	-4.65528	-3.90288	-4.44162	-4.44411	-4.20167
2810468N07Rik	-3.95035	-4.02159	-4.39914	-4.14772	-3.82261	-0.884511	-1.30241	-4.21778	-3.91233	-3.24527	-4.11046	-1.41806	-3.85997	1.53454	-0.202439	-4.44162	-4.44411	3.18204
2810471M01Rik	-3.95035	-4.02159	-4.39914	-4.14772	-3.82261	-5.27683	-4.76184	-4.21778	-3.91233	-4.83023	-4.11046	-4.8775	-3.85997	-4.65528	-3.90288	-4.44162	-4.44411	-4.20167
2810474O19Rik	7.96142	5.75813	8.54795	8.09575	8.44739	8.07176	9.09449	9.01569	9.40381	7.39949	7.90948	8.47082	9.41746	8.28228	8.19811	8.53727	8.7551	8.73626
2900005J15Rik	-2.36539	-4.02159	4.15928	-0.68829	1.53494	5.04848	-0.674378	4.67401	0.335602	-3.24527	1.17494	2.43539	-1.05262	3.89547	4.53591	6.12158	-2.85915	6.01629
2900008C10Rik	-3.95035	-4.02159	-4.39914	-4.14772	-3.82261	1.46464	-4.76184	-4.21778	-3.91233	-4.83023	-4.11046	-3.29253	-3.85997	2.3334	-2.31792	-2.11969	6.56222	5.99186
2900009J06Rik	-3.95035	-4.02159	-4.39914	-4.14772	-3.82261	-5.27683	-4.76184	-4.21778	-3.91233	-4.83023	-4.11046	-4.8775	-1.53804	-4.65528	-3.90288	-4.44162	-4.44411	3.24954
2900011O08Rik	-3.95035	-4.02159	-4.39914	-4.14772	-3.82261	1.59354	0.664424	-4.21778	-3.91233	-4.83023	-4.11046	1.59824	-3.85997	-4.65528	1.71183	-4.44162	-4.44411	-4.20167
2900026A02Rik	-2.36539	-4.02159	-0.49225	3.66606	-3.82261	3.55922	1.97963	0.537112	-2.32736	0.724356	-4.11046	2.99902	-2.27501	1.36709	4.14697	-4.44162	0.310779	5.72759
2900041M22Rik	-3.95035	-4.02159	-4.39914	-4.14772	-3.82261	-5.27683	-4.76184	-4.21778	-3.91233	-4.83023	-4.11046	-4.8775	-3.85997	-4.65528	-3.90288	-4.44162	-4.44411	-4.20167
2900052N01Rik	-3.95035	-4.02159	-4.39914	-4.14772	-3.82261	-5.27683	-4.76184	-4.21778	-3.91233	-4.83023	-4.11046	-4.8775	-3.85997	-4.65528	-3.90288	-4.44162	-4.44411	-4.20167
2900055J20Rik	-3.95035	-4.02159	-4.39914	-4.14772	-3.82261	-5.27683	-4.76184	-4.21778	-3.91233	-4.83023	-4.11046	-4.8775	-3.85997	-4.65528	-3.90288	-4.44162	-4.44411	-4.20167
2900056M20Rik	4.0212	7.10576	1.62323	4.29936	-0.363182	4.6465	1.1689	4.92943	-0.452894	4.04321	5.22716	2.93628	1.92139	1.12608	2.54006	2.77755	5.62333	-1.39431
2900057B20Rik	-3.95035	-4.02159	-4.39914	-4.14772	-3.82261	-5.27683	-4.76184	-4.21778	-3.91233	-4.83023	-4.11046	-4.8775	-3.85997	-4.65528	-3.90288	-4.44162	-4.44411	-4.20167
2900060B14Rik	-3.95035	-4.02159	-4.39914	-4.14772	-3.82261	-5.27683	-4.76184	-2.63281	-3.91233	-4.83023	-4.11046	-4.8775	-3.85997	-4.65528	-3.90288	1.86216	-4.44411	-4.20167
2900076A07Rik	-3.95035	-2.43663	-4.39914	-1.82579	3.54371	2.34522	1.42798	2.85904	2.35446	1.27829	-4.11046	2.57371	-2.27501	-0.262962	2.83859	-4.44162	-0.984677	5.61051
2900079G21Rik	-3.95035	-4.02159	-4.39914	-4.14772	-3.82261	-5.27683	-4.76184	-4.21778	-3.91233	-4.83023	-4.11046	-4.8775	-3.85997	-4.65528	-3.90288	-4.44162	-4.44411	-4.20167
2900092C05Rik	-3.95035	-4.02159	-4.39914	-4.14772	-3.82261	-5.27683	-4.76184	-4.21778	-3.91233	-4.83023	-4.11046	-4.8775	-3.85997	-4.65528	-3.90288	-4.44162	-4.44411	-4.20167
2900092D14Rik	-3.95035	-4.02159	-4.39914	-4.14772	-3.82261	-5.27683	-4.76184	-4.21778	-3.91233	-4.83023	-4.11046	-4.8775	-3.85997	-4.65528	-3.90288	-4.44162	-4.44411	-4.20167
2900097C17Rik	4.59268	6.08562	5.44792	6.98863	6.25287	7.21978	6.97498	6.79694	7.45564	7.37648	7.27917	7.29399	8.04278	7.98429	6.04403	7.58248	6.61456	6.66329
3000002C10Rik	-1.62842	-4.02159	-4.39914	1.40687	3.56109	0.149437	4.61537	-4.21778	6.49813	0.897688	-4.11046	1.18859	-3.85997	3.86436	2.9173	-2.85666	-2.12218	-4.20167
3010001F23Rik	-3.95035	-4.02159	-4.39914	-4.14772	-3.82261	-5.27683	-4.76184	-4.21778	-3.91233	-4.83023	-4.11046	-4.8775	-3.85997	-4.65528	-3.90288	-4.44162	-4.44411	-4.20167
3010026O09Rik	1.60424	-4.02159	-2.81418	-4.14772	-3.82261	1.13256	5.73501	5.06067	-3.91233	-3.24527	3.482	1.42628	1.56629	-2.33335	4.5688	-4.44162	1.53317	-4.20167
3010033K07Rik	-3.95035	-4.02159	-4.39914	-4.14772	-3.82261	-5.27683	-4.76184	-4.21778	-3.91233	-4.83023	-4.11046	-4.8775	-3.85997	-4.65528	-3.90288	-4.44162	-4.44411	-4.20167
3100003L05Rik	-3.95035	-4.02159	-4.39914	-4.14772	-3.82261	-5.27683	-4.76184	-4.21778	-3.91233	-4.83023	-4.11046	-4.8775	-3.85997	-4.65528	-3.90288	-4.44162	-4.44411	-4.20167
3110001I22Rik	-2.36539	8.58041	4.0887	-0.977796	5.42294	0.831696	3.23251	3.57013	-3.91233	2.50068	4.18875	2.36091	-3.85997	-3.07032	-1.58095	-4.44162	-4.44411	-1.87974
3110002H16Rik	1.47592	-4.02159	-4.39914	-2.56276	0.569703	4.69167	0.282553	4.49496	-3.91233	0.66162	4.65441	3.77183	-1.05262	4.21884	4.14697	-1.63426	6.25945	4.23712
3110007F17Rik	4.82114	-4.02159	-4.39914	-4.14772	-3.82261	-5.27683	-4.76184	-4.21778	-3.91233	-4.83023	-4.11046	-4.8775	-3.85997	-4.65528	-3.90288	-4.44162	-0.984677	-4.20167
3110009E18Rik	-3.95035	-4.02159	-4.39914	-4.14772	-1.01526	-5.27683	-4.76184	-4.21778	-3.91233	1.35959	3.77828	1.59824	2.40682	4.86632	-3.90288	0.0819432	2.03163	-4.20167
3110009F21Rik	-3.95035	-4.02159	-4.39914	-4.14772	-3.82261	-5.27683	-4.76184	-4.21778	-3.91233	-4.83023	-4.11046	-4.8775	-3.85997	-4.65528	-3.90288	-4.44162	-4.44411	-4.20167
3110015C05Rik	-3.95035	-4.02159	-4.39914	-4.14772	-3.82261	-5.27683	-4.76184	-4.21778	-3.91233	-4.83023	-4.11046	-4.8775	-3.85997	-4.65528	-3.90288	-4.44162	-4.44411	-4.20167
3110021A11Rik	-3.95035	-4.02159	-4.39914	-4.14772	-3.82261	-5.27683	-4.76184	-4.21778	-3.91233	-4.83023	-4.11046	-4.8775	-3.85997	-4.65528	-3.90288	-4.44162	-4.44411	-4.20167
3110021N24Rik	-3.95035	-4.02159	2.39528	-4.14772	-3.82261	0.951991	0.96608	-2.63281	-3.91233	-3.24527	-1.78853	1.18859	-3.85997	-4.65528	5.44363	-2.85666	-4.44411	-4.20167
3110035E14Rik	1.72208	1.8113	-1.22922	2.86351	4.11402	2.61192	3.48133	-4.21778	6.34624	5.26912	1.44413	4.05619	-3.85997	1.88388	-0.443448	2.29985	1.93093	3.86979
3110039I08Rik	-3.95035	-4.02159	-4.39914	-4.14772	-3.82261	-5.27683	-4.76184	-4.21778	-3.91233	-4.83023	-4.11046	-4.8775	-3.85997	-4.65528	-3.90288	-4.44162	-4.44411	-4.20167
3110039M20Rik	-3.95035	-4.02159	-4.39914	-4.14772	-3.82261	-5.27683	-4.76184	-4.21778	-3.91233	-4.83023	-4.11046	-4.8775	-3.85997	-4.65528	-3.90288	-4.44162	-4.44411	-4.20167
3110040N11Rik	5.74488	-4.02159	2.34233	-2.56276	-3.82261	1.56866	-4.76184	2.46872	7.31469	3.41294	4.86968	0.0766998	3.76208	2.42154	5.51708	1.82517	-4.44411	3.05572
3110043O21Rik	4.28327	4.20241	5.68168	2.95031	0.569703	4.47304	2.00634	3.71886	1.7601	4.40099	5.14928	2.19932	0.99801	3.22124	2.43697	7.23566	7.13944	2.87515
3110045C21Rik	-3.95035	-4.02159	-4.39914	-4.14772	-3.82261	-5.27683	-4.76184	-2.63281	-1.5904	-4.83023	-2.5255	-4.8775	-3.85997	-4.65528	-3.90288	-2.85666	-2.85915	-4.20167
3110052M02Rik	5.38727	-1.21424	2.51972	4.44847	5.22451	2.49796	3.90704	4.29398	3.14296	3.5834	1.24709	4.24921	4.6117	1.322	3.73375	3.74326	-0.196181	-4.20167
3110056K07Rik	-1.62842	-2.43663	4.18206	3.7288	3.57827	3.87546	4.32827	1.93197	6.05778	3.44123	6.69609	4.93468	7.97805	3.43748	-0.732954	3.89377	3.14835	-1.87974
3110057O12Rik	-0.490916	2.51757	1.90464	-4.14772	-0.122174	1.19891	-4.76184	-4.21778	-2.32736	3.44123	5.67254	3.35612	1.63188	-4.65528	-3.90288	-2.85666	-4.44411	5.48308
3110062M04Rik	4.50465	1.59312	5.76013	0.496135	4.82614	4.99108	2.63579	5.90655	4.05922	4.88974	3.92846	4.69422	2.62094	5.18232	5.69126	3.35928	5.70111	5.64109
3110070M22Rik	-3.95035	-4.02159	2.44635	-4.14772	-3.82261	-5.27683	-3.17688	-4.21778	-3.91233	-4.83023	-4.11046	-4.8775	-3.85997	-4.65528	-3.90288	-4.44162	-4.44411	-4.20167
3110079O15Rik	-3.95035	-4.02159	-4.39914	-4.14772	-3.82261	-5.27683	-4.76184	-4.21778	-3.91233	-4.83023	-4.11046	-4.8775	-3.85997	-4.65528	-3.90288	-4.44162	-4.44411	-4.20167
3110082I17Rik	-2.36539	-4.02159	2.47122	-4.14772	0.932273	3.64501	2.37771	3.95715	5.29956	3.96093	2.22939	3.01125	-0.690046	5.44144	-1.58095	-2.11969	-4.44411	7.1004
3110082J24Rik	-3.95035	-4.02159	-4.39914	-4.14772	-3.82261	-5.27683	-4.76184	-4.21778	-3.91233	-4.83023	-4.11046	-4.8775	-3.85997	-4.65528	-3.90288	-4.44162	-4.44411	-4.20167
3110099E03Rik	-3.95035	-4.02159	-4.39914	-4.14772	-3.82261	-5.27683	-4.76184	-4.21778	-3.91233	-4.83023	-4.11046	-4.8775	-3.85997	-4.65528	-3.90288	-4.44162	-4.44411	-4.20167
3200001D21Rik	-3.95035	0.501968	-4.39914	-4.14772	-3.82261	1.8212	-4.76184	-4.21778	-3.91233	0.214161	-4.11046	4.22317	4.43005	-4.65528	1.2264	-4.44162	-4.44411	-4.20167
3300002I08Rik	-3.95035	-4.02159	-4.39914	-4.14772	-3.82261	-0.0673747	2.63904	0.42608	2.35446	-4.83023	-4.11046	-3.29253	-3.85997	-4.65528	-3.90288	0.416362	0.413873	-4.20167
3300005D01Rik	-3.95035	-4.02159	-4.39914	-4.14772	-3.82261	-5.27683	-4.76184	-4.21778	-3.91233	-4.83023	-1.30311	-4.8775	-3.85997	-4.65528	-3.90288	-4.44162	-4.44411	-4.20167
3632451O06Rik	-3.95035	-4.02159	-4.39914	-4.14772	-3.82261	-5.27683	-4.76184	-4.21778	-3.91233	-4.83023	-4.11046	-4.8775	-3.85997	-4.65528	-3.90288	-4.44162	-4.44411	-4.20167
3632454L22Rik	-0.780423	-4.02159	-4.39914	1.82956	-3.82261	-0.232434	-4.76184	-4.21778	-3.91233	0.951127	-4.11046	-3.29253	-3.85997	-4.65528	-1.09552	-4.44162	-4.44411	-4.20167
3830403N18Rik	-2.36539	-4.02159	-4.39914	-4.14772	-3.82261	-5.27683	-4.76184	0.305786	-3.91233	-0.582305	-4.11046	-0.970606	-3.85997	-2.33335	-3.90288	-4.44162	-1.27418	-4.20167
3830406C13Rik	5.80621	2.16823	0.355747	5.69306	6.72909	4.00626	6.52529	2.44044	6.46163	3.39377	5.95966	4.82468	6.05142	4.83858	3.21606	2.65641	6.77203	1.57969
3830408C21Rik	-3.95035	-4.02159	-2.07721	3.69148	-1.50069	1.46464	-4.76184	-4.21778	-3.91233	-4.83023	-0.0229988	-0.122609	4.40212	0.899309	-3.90288	-2.11969	1.11048	-4.20167
3830417A13Rik	-3.95035	-4.02159	-4.39914	-4.14772	-3.82261	-5.27683	-4.76184	-4.21778	-3.91233	-4.83023	-4.11046	-4.8775	-3.85997	-4.65528	-3.90288	-4.44162	-4.44411	-4.20167
3930402G23Rik	-3.95035	-4.02159	-4.39914	-4.14772	-3.82261	-5.27683	-4.76184	-4.21778	-3.91233	-4.83023	-4.11046	-4.8775	-3.85997	-4.65528	-3.90288	-4.44162	-4.44411	-4.20167
4430402I18Rik	-3.95035	-2.43663	-4.39914	-4.14772	-3.82261	1.90308	-4.76184	5.43148	-3.91233	-4.83023	-4.11046	4.07379	5.04992	-4.65528	-3.90288	-4.44162	-4.44411	-4.20167
4631405J19Rik	-3.95035	-4.02159	-4.39914	-4.14772	-3.82261	-5.27683	-4.76184	-4.21778	-3.91233	-4.83023	-4.11046	-3.29253	-3.85997	-4.65528	-3.90288	-4.44162	-4.44411	-4.20167
4632415L05Rik	-3.95035	-4.02159	5.08669	3.58699	2.94557	4.9387	0.192356	5.69362	-3.91233	5.61582	0.933933	4.84872	0.99801	3.83256	1.87848	3.02599	4.09117	3.78133
4632427E13Rik	2.79112	6.26958	2.36904	4.27434	4.06613	2.68317	1.01952	4.28605	-2.32736	1.79912	3.70332	4.67517	5.5473	-1.19585	-2.31792	2.3528	4.07553	-0.294777
4632428C04Rik	-3.95035	1.10769	-2.07721	-4.14772	-3.82261	-2.9549	4.48371	2.25796	-3.91233	-2.02288	-4.11046	-1.17706	-3.85997	6.27027	-3.90288	-1.27169	-4.44411	-4.20167
4632428N05Rik	10.3922	10.8129	10.3131	10.1778	10.4357	10.1325	10.622	10.3411	10.8413	9.67129	10.0945	9.90238	10.6678	9.98253	10.1133	9.95612	10.8671	10.1624
4632434I11Rik	-3.95035	-4.02159	-4.39914	-4.14772	-3.82261	-5.27683	-4.76184	-4.21778	6.1975	3.17539	-4.11046	-2.55557	-3.85997	-4.65528	-3.90288	-2.85666	-4.44411	4.34908
4732416N19Rik	-3.95035	-4.02159	-4.39914	-4.14772	-3.82261	-5.27683	-4.76184	-4.21778	-3.91233	-4.83023	-4.11046	-4.8775	-3.85997	-4.65528	-3.90288	-4.44162	-4.44411	-4.20167
4732456N10Rik	-3.95035	-4.02159	-4.39914	-4.14772	-3.82261	-5.27683	-4.76184	-4.21778	-3.91233	-4.83023	-4.11046	-4.8775	-3.85997	-4.65528	-3.90288	-4.44162	-4.44411	-4.20167
4732471J01Rik	-2.36539	3.83016	2.0438	-4.14772	-0.652689	2.48472	-2.90585	-4.21778	-3.91233	1.1005	-4.11046	1.72983	6.25507	-3.07032	3.89802	-2.11969	3.20694	2.13818
4732490B19Rik	-3.95035	-4.02159	-4.39914	-4.14772	-3.82261	-5.27683	-4.76184	-4.21778	-3.91233	-4.83023	-4.11046	-4.8775	-3.85997	-4.65528	-3.90288	-4.44162	-4.44411	-4.20167
4732491K20Rik	-3.95035	3.44601	-0.311678	-4.14772	-3.82261	2.95679	2.39803	-2.63281	-3.91233	-4.83023	-4.11046	3.33682	-3.85997	-4.65528	2.11949	-4.44162	-4.44411	-4.20167
4831440E17Rik	-3.95035	-4.02159	-4.39914	3.82382	1.30667	3.07632	-4.76184	5.66028	-0.742401	3.10641	2.5189	2.39863	5.00112	-4.65528	-3.90288	4.63252	-4.44411	-2.61671
4833403I15Rik	-3.95035	-4.02159	-4.39914	-4.14772	-3.82261	-5.27683	-4.76184	-4.21778	-3.91233	-4.83023	-4.11046	-4.8775	-3.85997	-4.65528	-3.90288	-4.44162	-4.44411	-4.20167
4833411C07Rik	-1.14299	-4.02159	1.38222	-4.14772	3.39655	-0.322632	0.792748	-2.63281	-3.91233	4.82976	1.72243	3.93949	-3.85997	-4.65528	-1.09552	-4.44162	-1.63675	2.48483
4833412C05Rik	-3.95035	-4.02159	-4.39914	-4.14772	-3.82261	-5.27683	-4.76184	-4.21778	-3.91233	-4.83023	-4.11046	-4.8775	-3.85997	-4.65528	-3.90288	-4.44162	-4.44411	-4.20167
4833417C18Rik	-2.36539	-2.43663	-4.39914	4.52824	-1.01526	3.54016	4.45005	2.49647	-0.742401	3.74341	-0.940537	4.89234	-1.05262	-0.567817	3.25699	0.512578	-0.196181	5.62011
4833418N02Rik	-3.95035	-2.43663	-4.39914	-4.14772	-3.82261	0.00857418	-4.76184	-1.41042	-2.32736	-1.12979	3.37335	0.614357	-3.85997	-0.567817	-3.90288	-4.44162	-2.85915	-1.03174
4833419F23Rik	-3.95035	-4.02159	-4.39914	-4.14772	-3.82261	-5.27683	-4.76184	-4.21778	-3.91233	-4.83023	-4.11046	-4.8775	-3.85997	-4.65528	-3.90288	-4.44162	-4.44411	-4.20167
4833420G17Rik	2.79112	3.99521	7.85972	4.42593	8.5527	5.40529	5.13752	5.65721	6.60436	6.24859	4.78132	5.5393	7.6193	8.11518	4.73012	5.30825	0.913444	6.04507
4833422C13Rik	-3.95035	-4.02159	-4.39914	4.73113	-1.50069	1.51759	2.56351	-4.21778	-3.91233	3.43186	-2.45054	0.251786	-3.85997	-3.07032	-3.90288	-4.44162	-4.44411	-4.20167
4833423E24Rik	-3.95035	-4.02159	-4.39914	-4.14772	-3.82261	-5.27683	-4.76184	-4.21778	-3.91233	-4.83023	-4.11046	-4.8775	-3.85997	-4.65528	-3.90288	-4.44162	-4.44411	-4.20167
4833424O15Rik	-3.95035	-4.02159	-4.39914	-4.14772	-3.82261	-5.27683	-4.76184	-4.21778	-3.91233	-4.83023	-4.11046	-4.8775	-3.85997	-4.65528	-3.90288	-0.982187	-4.44411	-4.20167
4833427F10Rik	-3.95035	-4.02159	-4.39914	-4.14772	-3.82261	-5.27683	-4.76184	-4.21778	-3.91233	-4.83023	-4.11046	-4.8775	-3.85997	-4.65528	-3.90288	-4.44162	-4.44411	-4.20167
4833427G06Rik	-3.95035	-4.02159	-4.39914	-4.14772	-3.82261	-5.27683	-4.76184	-4.21778	-3.91233	-4.83023	-4.11046	-4.8775	-3.85997	-4.65528	-3.90288	-4.44162	-4.44411	-4.20167
4833428L15Rik	-3.95035	-4.02159	-4.39914	-4.14772	-3.82261	-5.27683	-4.76184	-4.21778	-3.91233	-4.83023	-4.11046	-4.8775	-3.85997	-4.65528	-3.90288	-4.44162	-4.44411	-4.20167
4833439L19Rik	6.35229	8.49731	6.04069	7.47204	7.11917	6.75556	6.71844	4.27006	7.45782	6.99989	7.70051	6.08901	7.13932	5.05725	6.47107	4.74573	6.32656	4.52965
4921501E09Rik	-3.95035	-4.02159	-4.39914	-4.14772	-3.82261	-5.27683	-4.76184	-4.21778	-3.91233	-4.83023	-4.11046	-4.8775	-3.85997	-4.65528	-3.90288	-4.44162	-4.44411	-4.20167
4921504A21Rik	-3.95035	-4.02159	-4.39914	-4.14772	-3.82261	-5.27683	-4.76184	-4.21778	-3.91233	-4.83023	-4.11046	-4.8775	-3.85997	-4.65528	-3.90288	-4.44162	-4.44411	-4.20167
4921504E06Rik	-3.95035	-4.02159	-4.39914	-4.14772	-3.82261	-5.27683	-4.76184	-4.21778	-3.91233	-4.83023	-4.11046	-4.8775	-3.85997	-4.65528	-3.90288	-4.44162	-4.44411	-4.20167
4921506M07Rik	-3.95035	-4.02159	-4.39914	-4.14772	-3.82261	-5.27683	-4.76184	-4.21778	-3.91233	-4.83023	-4.11046	-4.8775	-3.85997	-4.65528	-3.90288	-4.44162	-4.44411	-4.20167
4921507L20Rik	-0.490916	-4.02159	3.59521	-4.14772	4.29113	-0.632972	-4.76184	1.45465	-3.91233	-0.582305	-4.11046	3.01125	-3.85997	-1.84792	-3.90288	-4.44162	3.36967	-4.20167
4921507P07Rik	-3.95035	-1.69967	-4.39914	-4.14772	-3.82261	1.06302	-1.59192	2.62771	-3.91233	-4.83023	-4.11046	-4.8775	-3.85997	-2.33335	-3.90288	-4.44162	-4.44411	3.36057
4921508D12Rik	-3.95035	-4.02159	-4.39914	-4.14772	-3.82261	-5.27683	-4.76184	-4.21778	-3.91233	-4.83023	-4.11046	-4.8775	-3.85997	-4.65528	-3.90288	-4.44162	-4.44411	-4.20167
4921509C19Rik	-3.95035	-4.02159	-4.39914	-4.14772	-3.82261	-5.27683	-4.76184	-4.21778	-3.91233	-4.83023	-4.11046	-4.8775	-3.85997	-4.65528	-3.90288	-4.44162	-4.44411	-4.20167
4921509O07Rik	-3.95035	-4.02159	-4.39914	-4.14772	-3.82261	-5.27683	-4.76184	-4.21778	-3.91233	-4.83023	-4.11046	-4.8775	-3.85997	-4.65528	-3.90288	-4.44162	-4.44411	-4.20167
4921511C10Rik	-3.95035	-4.02159	-4.39914	-4.14772	-3.82261	-5.27683	-4.76184	-4.21778	-2.32736	-0.74277	-4.11046	-1.17706	-3.85997	-4.65528	-1.09552	-4.44162	-4.44411	-4.20167
4921511C20Rik	-3.95035	-4.02159	-4.39914	-4.14772	-3.82261	-5.27683	-4.76184	-4.21778	-3.91233	-4.83023	-4.11046	-4.8775	-3.85997	-4.65528	-3.90288	-4.44162	-4.44411	-4.20167
4921511H03Rik	-3.95035	-4.02159	-4.39914	-4.14772	-3.82261	-5.27683	-4.76184	-4.21778	-3.91233	-4.83023	-4.11046	-4.8775	-3.85997	-4.65528	-3.90288	-4.44162	-4.44411	-4.20167
4921511I17Rik	-3.95035	-4.02159	0.355747	-4.14772	-3.82261	-5.27683	-4.76184	-4.21778	-3.91233	-4.83023	-4.11046	-4.8775	-3.85997	-4.65528	-3.90288	-4.44162	-4.44411	-4.20167
4921511M17Rik	-3.95035	-4.02159	-4.39914	-4.14772	-3.82261	-5.27683	-4.76184	-4.21778	-3.91233	-4.83023	-4.11046	-4.8775	-3.85997	-4.65528	-3.90288	-4.44162	-4.44411	-4.20167
4921513I03Rik	-3.95035	-4.02159	-4.39914	-4.14772	-3.82261	-5.27683	-4.76184	-4.21778	-3.91233	-4.83023	-4.11046	-4.8775	-3.85997	-4.65528	-3.90288	-4.44162	-4.44411	-4.20167
4921515E04Rik	-3.95035	-4.02159	-4.39914	-4.14772	-3.82261	-5.27683	-4.76184	-4.21778	-3.91233	-4.83023	-4.11046	-4.8775	-3.85997	-4.65528	-3.90288	-4.44162	-4.44411	-4.20167
4921517D22Rik	-3.95035	-4.02159	-4.39914	-4.14772	-3.82261	-5.27683	-4.76184	-4.21778	-3.91233	-4.83023	-4.11046	-4.8775	-3.85997	-4.65528	-3.90288	-4.44162	-4.44411	-4.20167
4921524J17Rik	-3.95035	-4.02159	5.53307	-4.14772	-3.82261	1.54335	-4.76184	-4.21778	-3.91233	2.04013	-4.11046	-3.29253	-3.85997	-4.65528	-3.90288	0.0819432	-4.44411	-2.61671
4921524L21Rik	-3.95035	-4.02159	-4.39914	-4.14772	-3.82261	-5.27683	-4.76184	-4.21778	-3.91233	-4.83023	-4.11046	-4.8775	-3.85997	-4.65528	-3.90288	-4.44162	-4.44411	-4.20167
4921525O09Rik	-3.95035	-4.02159	-4.39914	-4.14772	-3.82261	-5.27683	-4.76184	-4.21778	-3.91233	-4.83023	-4.11046	-4.8775	-3.85997	-4.65528	-3.90288	-4.44162	-4.44411	-4.20167
4921529L05Rik	-3.95035	-4.02159	-4.39914	-4.14772	-3.82261	-5.27683	-4.76184	-4.21778	-3.91233	-4.83023	-4.11046	-4.8775	-3.85997	-4.65528	-3.90288	-4.44162	-4.44411	-4.20167
4921530L21Rik	-3.95035	-4.02159	-4.39914	-4.14772	-3.82261	-5.27683	-4.76184	-4.21778	-3.91233	-4.83023	-4.11046	-4.8775	-3.85997	-4.65528	-3.90288	-4.44162	-4.44411	-4.20167
4921531C22Rik	6.27727	-1.69967	-4.39914	6.14345	-3.82261	2.1578	0.910585	0.736421	-3.91233	0.29905	-0.410022	1.69236	-1.05262	-4.65528	-2.31792	-4.44162	-4.44411	2.74085
4921531P14Rik	-3.95035	-4.02159	-4.39914	-4.14772	-3.82261	-5.27683	-4.76184	-4.21778	-3.91233	-4.83023	-4.11046	-4.8775	-3.85997	-4.65528	-3.90288	-4.44162	-4.44411	-4.20167
4921533I20Rik	-3.95035	-4.02159	-4.39914	-4.14772	-3.82261	-5.27683	-4.76184	-4.21778	-3.91233	-4.83023	-4.11046	-4.8775	-3.85997	-4.65528	-3.90288	-4.44162	-4.44411	-4.20167
4921534H16Rik	-3.95035	-4.02159	-4.39914	-4.14772	-3.82261	-5.27683	-4.76184	-4.21778	-3.91233	-4.83023	-4.11046	-4.8775	-3.85997	-4.65528	-3.90288	-4.44162	-4.44411	-4.20167
4921536K21Rik	-3.95035	-4.02159	-4.39914	-4.14772	-3.82261	-0.232434	-4.76184	-2.63281	-3.91233	2.08863	-4.11046	-4.8775	-3.85997	-4.65528	-3.90288	-4.44162	-4.44411	-4.20167
4921539E11Rik	-3.95035	-4.02159	-4.39914	-4.14772	-3.82261	-5.27683	-4.76184	-4.21778	-3.91233	-4.83023	-4.11046	-4.8775	-3.85997	-4.65528	-3.90288	-4.44162	-4.44411	-4.20167
4922502D21Rik	-3.95035	-4.02159	-4.39914	-4.14772	-3.82261	-5.27683	-4.76184	-4.21778	-3.91233	-4.83023	-4.11046	-4.8775	-3.85997	-4.65528	-3.90288	-4.44162	-4.44411	-4.20167
4922502H24Rik	-3.95035	-4.02159	-4.39914	-4.14772	-3.82261	-5.27683	-4.76184	-4.21778	-3.91233	-4.83023	-4.11046	-4.8775	-3.85997	-4.65528	-3.90288	-4.44162	-4.44411	-4.20167
4922502N22Rik	-3.95035	-4.02159	-4.39914	-4.14772	-3.82261	-5.27683	-4.76184	-4.21778	-3.91233	-4.83023	-4.11046	-4.8775	-3.85997	-4.65528	-3.90288	-4.44162	-4.44411	-4.20167
4930401C15Rik	-3.95035	-4.02159	-4.39914	-4.14772	-3.82261	-5.27683	-4.76184	-4.21778	-3.91233	-4.83023	-4.11046	-4.8775	-3.85997	-4.65528	-3.90288	-4.44162	-4.44411	-4.20167
4930401O10Rik	-3.95035	-4.02159	-4.39914	-4.14772	-3.82261	-5.27683	-4.76184	-4.21778	-3.91233	-4.83023	-4.11046	-4.8775	-3.85997	-4.65528	-3.90288	-4.44162	-4.44411	-4.20167
4930401O12Rik	-3.95035	-4.02159	-4.39914	-4.14772	-3.82261	-5.27683	-4.76184	-4.21778	-3.91233	-4.83023	-4.11046	-4.8775	-3.85997	-4.65528	-3.90288	-4.44162	-4.44411	-4.20167
4930402F06Rik	-3.95035	-4.02159	-4.39914	-4.14772	-3.82261	-5.27683	-4.76184	-4.21778	-3.91233	-4.83023	-4.11046	-4.8775	-3.85997	-4.65528	-3.90288	-4.44162	-4.44411	-4.20167
4930402F11Rik	-3.95035	-4.02159	-4.39914	-4.14772	-3.82261	-5.27683	-4.76184	-4.21778	-3.91233	-4.83023	-4.11046	-4.8775	-3.85997	-4.65528	-3.90288	-4.44162	-4.44411	-4.20167
4930402H24Rik	-3.95035	-2.43663	-1.59179	-0.447282	3.02288	2.99463	-1.95449	7.94367	-3.91233	2.40817	3.80243	2.34167	-2.27501	4.8545	-1.09552	-0.354156	-4.44411	0.321894
4930402K13Rik	-3.95035	-4.02159	-4.39914	-4.14772	-3.82261	-5.27683	-4.76184	-4.21778	-3.91233	-4.83023	-4.11046	-4.8775	-3.85997	-4.65528	-3.90288	-4.44162	-4.44411	-4.20167
4930404A05Rik	-3.95035	-4.02159	-4.39914	-4.14772	-3.82261	-5.27683	-4.76184	-4.21778	-3.91233	-4.83023	-4.11046	-4.8775	-3.85997	-4.65528	-3.90288	-4.44162	-4.44411	-4.20167
4930404A10Rik	-3.95035	-4.02159	-4.39914	-4.14772	-3.82261	-5.27683	-4.76184	-4.21778	-3.91233	-4.83023	-4.11046	-4.8775	-3.85997	-4.65528	-3.90288	-4.44162	-4.44411	-4.20167
4930404H11Rik	-3.95035	-4.02159	-4.39914	-4.14772	-3.82261	-5.27683	-4.76184	-4.21778	-3.91233	-4.83023	-4.11046	-4.8775	-3.85997	-4.65528	-3.90288	-4.44162	-4.44411	-4.20167
4930404I05Rik	-3.95035	-4.02159	-4.39914	-4.14772	-3.82261	-1.57639	-1.0614	-4.21778	-3.91233	-0.582305	-4.11046	-0.23364	-3.85997	-4.65528	-3.90288	-2.85666	-4.44411	2.10211
4930404N11Rik	-3.95035	-4.02159	3.44006	-1.34037	-3.82261	-1.0289	-4.76184	-0.130313	-3.91233	-4.83023	-4.11046	-4.8775	-3.85997	-3.07032	-3.90288	-4.44162	-4.44411	0.321894
4930405A10Rik	-3.95035	-4.02159	3.33557	-4.14772	-3.82261	3.90557	2.15702	0.305786	-3.91233	0.66162	1.38139	2.22054	-3.85997	-4.65528	-3.90288	5.22194	-4.44411	-0.742236
4930405A21Rik	-3.95035	-2.43663	-4.39914	-4.14772	-3.82261	1.7344	-4.76184	-4.21778	-3.91233	-2.5083	-4.11046	-2.55557	-3.85997	4.68679	-3.90288	-1.27169	-4.44411	-4.20167
4930405D11Rik	-3.95035	-4.02159	-4.39914	-4.14772	-3.82261	-5.27683	-4.76184	-4.21778	-3.91233	-4.83023	-4.11046	-4.8775	-3.85997	-4.65528	-3.90288	-4.44162	-4.44411	-4.20167
4930405J17Rik	-3.95035	-4.02159	-4.39914	-4.14772	-3.82261	-5.27683	-4.76184	-4.21778	-3.91233	-4.83023	-4.11046	-4.8775	-3.85997	-4.65528	-3.90288	-4.44162	-4.44411	-4.20167
4930405L22Rik	-3.95035	-4.02159	-4.39914	-4.14772	-3.82261	-5.27683	-4.76184	-4.21778	-3.91233	-4.83023	-4.11046	-4.8775	-3.85997	-4.65528	-3.90288	-4.44162	-4.44411	-4.20167
4930406D18Rik	-3.95035	-4.02159	-4.39914	-4.14772	-3.82261	-5.27683	-4.76184	-4.21778	-3.91233	-4.83023	-4.11046	-4.8775	-3.85997	-4.65528	-3.90288	-4.44162	-4.44411	-4.20167
4930407I10Rik	-3.95035	-4.02159	-4.39914	-4.14772	-3.82261	-5.27683	-4.76184	-4.21778	-3.91233	-4.83023	-4.11046	-4.8775	-3.85997	-4.65528	-3.90288	-4.44162	-4.44411	-4.20167
4930412B13Rik	-3.95035	-4.02159	-4.39914	-4.14772	-3.82261	-5.27683	-4.76184	-4.21778	-3.91233	-4.83023	-4.11046	-4.8775	-3.85997	-4.65528	-3.90288	-4.44162	-4.44411	-4.20167
4930412C18Rik	-3.95035	-4.02159	-4.39914	-4.14772	-3.82261	-2.9549	-4.76184	-4.21778	-3.91233	-4.83023	-4.11046	-4.8775	-3.85997	-4.65528	-3.90288	-4.44162	-4.44411	-4.20167
4930412D23Rik	-3.95035	-4.02159	-4.39914	-4.14772	-3.82261	-5.27683	-4.76184	-4.21778	-3.91233	-4.83023	-4.11046	-4.8775	-3.85997	-4.65528	-3.90288	-4.44162	-4.44411	-4.20167
4930412O13Rik	-3.95035	-4.02159	-4.39914	-4.14772	-3.82261	-5.27683	-4.76184	-4.21778	-3.91233	-4.83023	-4.11046	-4.8775	-3.85997	-4.65528	-3.90288	-4.44162	-4.44411	-4.20167
4930413E15Rik	-3.95035	-4.02159	-4.39914	-4.14772	-3.82261	-5.27683	-4.76184	-4.21778	-3.91233	-4.83023	-4.11046	-4.8775	-3.85997	-4.65528	-3.90288	-4.44162	-4.44411	-4.20167
4930413F20Rik	-3.95035	-4.02159	-4.39914	-4.14772	-3.82261	-5.27683	-4.76184	-4.21778	-3.91233	-4.83023	-4.11046	-4.8775	-3.85997	-4.65528	-3.90288	-4.44162	-4.44411	-4.20167
4930413G21Rik	-3.95035	-4.02159	-4.39914	-4.14772	-3.82261	-2.9549	-4.76184	-0.758344	-3.91233	-4.83023	-4.11046	-4.8775	-3.85997	-4.65528	-1.09552	-4.44162	-4.44411	-4.20167
4930413M19Rik	-3.95035	-4.02159	-4.39914	-4.14772	-3.82261	-5.27683	-4.76184	-4.21778	-3.91233	-4.83023	-4.11046	-4.8775	-3.85997	-4.65528	-3.90288	-4.44162	-4.44411	-4.20167
4930414L22Rik	-3.95035	-4.02159	-2.79507	-1.33215	-3.82261	0.990708	-0.85495	-4.21778	-2.32736	2.70395	2.19332	-2.54407	-3.85997	-4.65528	-2.31792	-2.11393	-2.12218	-4.20167
4930414N06Rik	-3.95035	-2.43663	-4.39914	-4.14772	-3.82261	-2.46947	-4.76184	-4.21778	-3.91233	0.66162	-4.11046	-0.790034	-3.85997	-4.65528	-3.90288	-4.44162	-4.44411	-4.20167
4930415F15Rik	-3.95035	-4.02159	-4.39914	-4.14772	-3.82261	-5.27683	-4.76184	-4.21778	-3.91233	-4.83023	-4.11046	-4.8775	-3.85997	-4.65528	-3.90288	-4.44162	-4.44411	-4.20167
4930415L06Rik	-3.95035	-4.02159	-4.39914	-4.14772	-3.82261	-5.27683	-4.76184	-4.21778	-3.91233	-4.83023	-4.11046	-4.8775	-3.85997	-4.65528	-3.90288	-4.44162	-4.44411	-4.20167
4930415O20Rik	-3.95035	-4.02159	-4.39914	-4.14772	-3.82261	-5.27683	-4.76184	-4.21778	-3.91233	-4.83023	-4.11046	-4.8775	-3.85997	-4.65528	-3.90288	-4.44162	-4.44411	-4.20167
4930417O13Rik	-3.95035	-4.02159	-4.39914	-4.14772	-3.82261	-5.27683	-4.76184	-4.21778	-3.91233	-4.83023	-4.11046	-4.8775	-3.85997	-4.65528	-3.90288	-4.44162	-4.44411	-4.20167
4930417O22Rik	-3.95035	-4.02159	-4.39914	-4.14772	-3.82261	-5.27683	-4.76184	-4.21778	-3.91233	-4.83023	-4.11046	-4.8775	-3.85997	-4.65528	-3.90288	-4.44162	-4.44411	-4.20167
4930419G24Rik	-3.95035	-4.02159	-4.39914	-4.14772	-3.82261	-5.27683	-4.76184	-4.21778	-3.91233	-4.83023	-4.11046	-4.8775	-3.85997	-4.65528	-3.90288	-4.44162	-4.44411	-4.20167
4930423M02Rik	-3.95035	-4.02159	-4.39914	-4.14772	-3.82261	-5.27683	-4.76184	-4.21778	-3.91233	-4.83023	-4.11046	-4.8775	-3.85997	-4.65528	-3.90288	-4.44162	-4.44411	-4.20167
4930425K10Rik	-3.95035	-4.02159	-4.39914	-4.14772	-3.82261	-5.27683	-4.76184	-4.21778	-3.91233	-4.83023	-4.11046	-4.8775	-3.85997	-4.65528	-3.90288	-4.44162	-4.44411	-4.20167
4930425O10Rik	-3.95035	-4.02159	-4.39914	-4.14772	-3.82261	-5.27683	-4.76184	-4.21778	-3.91233	-4.83023	-4.11046	-4.8775	-3.85997	-4.65528	-3.90288	-4.44162	-4.44411	-4.20167
4930426D05Rik	-3.95035	-4.02159	-4.39914	-4.14772	-3.82261	-5.27683	-4.76184	-4.21778	-3.91233	-4.83023	-4.11046	-4.8775	-3.85997	-4.65528	-3.90288	-4.44162	-4.44411	-4.20167
4930426L09Rik	-3.95035	-4.02159	-4.39914	-4.14772	-3.82261	4.92407	2.62186	2.15726	-3.91233	4.34219	-4.11046	0.407906	-3.85997	-4.65528	-3.90288	-2.85666	-4.44411	-2.61671
4930427A07Rik	-2.36539	-4.02159	-4.39914	-4.14772	4.43005	0.605815	-4.76184	-4.21778	-3.91233	-4.83023	-4.11046	-4.8775	-2.27501	-4.65528	-3.90288	-4.44162	-4.44411	-4.20167
4930428D18Rik	-3.95035	-4.02159	-4.39914	-4.14772	-3.82261	-5.27683	-4.76184	-4.21778	-3.91233	-4.83023	-4.11046	-4.8775	-3.85997	-4.65528	-3.90288	-4.44162	-4.44411	-4.20167
4930428E07Rik	-3.95035	-4.02159	-4.39914	-4.14772	-3.82261	-5.27683	-4.76184	-4.21778	-3.91233	-4.83023	-4.11046	-4.8775	-3.85997	-4.65528	-3.90288	-4.44162	-4.44411	-4.20167
4930428G15Rik	-3.95035	-4.02159	-4.39914	-4.14772	-3.82261	-5.27683	-4.76184	-4.21778	-3.91233	-4.83023	-4.11046	-4.8775	-3.85997	-4.65528	-3.90288	-4.44162	-4.44411	-4.20167
4930428O21Rik	-3.95035	-4.02159	-4.39914	-4.14772	-3.82261	-5.27683	-4.76184	-4.21778	-3.91233	-4.83023	-4.11046	-4.8775	-3.85997	-4.65528	-3.90288	-4.44162	-4.44411	-4.20167
4930429B21Rik	-3.95035	-4.02159	-4.39914	-4.14772	-3.82261	-5.27683	-0.0069533	-4.21778	-3.91233	-4.83023	-4.11046	-4.8775	-3.85997	-4.65528	-3.90288	-4.44162	-4.44411	-4.20167
4930429D17Rik	-3.95035	-4.02159	-4.39914	-4.14772	-3.82261	-5.27683	-4.76184	-4.21778	-3.91233	-4.83023	-4.11046	-4.8775	-3.85997	-4.65528	-3.90288	-4.44162	-4.44411	-4.20167
4930429F11Rik	-3.95035	-4.02159	-4.39914	-4.14772	-3.82261	-5.27683	-4.76184	-4.21778	-3.91233	-4.83023	-4.11046	-4.8775	-3.85997	-4.65528	-3.90288	-4.44162	-4.44411	-4.20167
4930429F24Rik	-3.95035	-4.02159	-4.39914	-4.14772	-3.82261	-3.69187	-4.76184	-4.21778	-3.91233	-4.83023	-4.11046	-4.8775	-3.85997	-4.65528	-3.90288	-4.44162	-4.44411	-4.20167
4930430A15Rik	-3.95035	-4.02159	-4.39914	-4.14772	-3.82261	-5.27683	-4.76184	-4.21778	-3.91233	-4.83023	-4.11046	-4.8775	-3.85997	-4.65528	-3.90288	-4.44162	-4.44411	-4.20167
4930430D24Rik	-3.95035	-4.02159	-4.39914	-4.14772	-3.82261	-5.27683	-4.76184	-4.21778	-3.91233	-4.83023	-4.11046	-4.8775	-3.85997	-4.65528	-3.90288	-4.44162	-4.44411	-4.20167
4930430F08Rik	3.34427	-4.02159	-4.39914	-4.14772	3.02288	2.61508	-4.76184	-1.41042	-3.91233	3.79767	3.75842	2.8511	-3.85997	2.08619	-3.90288	-4.44162	0.600286	-4.20167
4930430F21Rik	-3.95035	-4.02159	-4.39914	-4.14772	-3.82261	-5.27683	-4.76184	-4.21778	-3.91233	-4.83023	-4.11046	-4.8775	-3.85997	-4.65528	-3.90288	-4.44162	-4.44411	-4.20167
4930430J02Rik	-3.95035	-4.02159	-4.39914	-4.14772	-3.82261	-5.27683	-4.76184	-4.21778	-3.91233	-0.0753452	-4.11046	-4.8775	-3.85997	-4.65528	-3.90288	-4.44162	-4.44411	-4.20167
4930431F12Rik	-3.95035	-4.02159	-4.39914	-4.14772	-3.82261	-5.27683	-4.76184	-4.21778	-3.91233	-4.83023	-4.11046	-4.8775	-3.85997	-4.65528	-3.90288	-4.44162	-4.44411	-4.20167
4930431P03Rik	-3.95035	-4.02159	-4.39914	-4.14772	-3.82261	-5.27683	-4.76184	-4.21778	-3.91233	-4.83023	-4.11046	-4.8775	-3.85997	-4.65528	-3.90288	-4.44162	-4.44411	-4.20167
4930432J09Rik	-3.95035	-4.02159	-4.39914	-4.14772	-3.82261	-5.27683	-4.76184	-4.21778	-3.91233	-4.83023	-4.11046	-4.8775	-3.85997	-4.65528	-3.90288	-4.44162	-4.44411	-4.20167
4930432K21Rik	-3.95035	-4.02159	-4.39914	-4.14772	-3.82261	-0.521941	-4.76184	-4.21778	-2.32736	-0.74277	-4.11046	-1.70757	-3.85997	4.48171	-3.90288	-0.193691	-4.44411	-4.20167
4930432M17Rik	-3.95035	-4.02159	-4.39914	-4.14772	-3.82261	-5.27683	-4.76184	-4.21778	-3.91233	-4.83023	-4.11046	-4.8775	-3.85997	-4.65528	-3.90288	-4.44162	-4.44411	-4.20167
4930433B08Rik	-3.95035	-4.02159	-4.39914	-4.14772	-3.82261	-5.27683	-4.76184	-4.21778	-3.91233	-4.83023	-4.11046	-4.8775	-3.85997	-4.65528	-3.90288	-4.44162	-4.44411	-4.20167
4930433I11Rik	-3.95035	-4.02159	-4.39914	-4.14772	-3.82261	-5.27683	-4.76184	-4.21778	-3.91233	-4.83023	-4.11046	-4.8775	-3.85997	-4.65528	-3.90288	-4.44162	-4.44411	-4.20167
4930433N12Rik	-3.95035	-4.02159	-4.39914	-4.14772	-3.82261	-5.27683	-4.76184	-4.21778	-3.91233	-4.83023	-4.11046	-4.8775	-3.85997	-4.65528	-3.90288	-4.44162	-4.44411	-4.20167
4930434J06Rik	-3.95035	-4.02159	-4.39914	-4.14772	-3.82261	-5.27683	-4.76184	-4.21778	-3.91233	-4.83023	-4.11046	-4.8775	-3.85997	-4.65528	-3.90288	-4.44162	-4.44411	-4.20167
4930435E12Rik	-3.95035	-4.02159	-4.39914	-4.14772	-3.82261	-5.27683	-4.76184	-4.21778	-3.91233	-4.83023	-4.11046	-4.8775	-3.85997	-4.65528	-3.90288	-4.44162	-4.44411	-4.20167
4930438E09Rik	-3.95035	-4.02159	-4.39914	-4.14772	-3.82261	-5.27683	-4.76184	-4.21778	-3.91233	-4.83023	-4.11046	-4.8775	-3.85997	-4.65528	-3.90288	-4.44162	-4.44411	-4.20167
4930440C22Rik	-3.95035	-4.02159	-4.39914	-4.14772	-3.82261	-5.27683	-4.76184	-4.21778	-3.91233	-4.83023	-4.11046	-4.8775	-3.85997	-4.65528	-3.90288	-4.44162	-4.44411	-4.20167
4930440I19Rik	-3.95035	-4.02159	-4.39914	-4.14772	-3.82261	-5.27683	-4.76184	-4.21778	-3.91233	-4.83023	-4.11046	-4.8775	-3.85997	-4.65528	-3.90288	-4.44162	-4.44411	-4.20167
4930441J16Rik	-3.95035	-4.02159	-4.39914	-4.14772	-3.82261	-5.27683	-4.76184	-4.21778	-3.91233	-4.83023	-4.11046	-4.8775	-3.85997	-4.65528	-3.90288	-4.44162	-4.44411	-4.20167
4930442J19Rik	-3.95035	-4.02159	-4.39914	-4.14772	-3.82261	-5.27683	-4.76184	-4.21778	-3.91233	-4.83023	-4.11046	-4.8775	-3.85997	-4.65528	-3.90288	-4.44162	-4.44411	-4.20167
4930442L01Rik	-3.95035	-4.02159	-4.39914	-4.14772	-3.82261	-5.27683	-4.76184	-4.21778	-3.91233	-4.83023	-4.11046	-4.8775	-3.85997	-4.65528	-3.90288	-4.44162	-4.44411	-4.20167
4930443O20Rik	-3.95035	-4.02159	-4.39914	-4.14772	-3.82261	-5.27683	-4.76184	-4.21778	-3.91233	-4.83023	-4.11046	-4.8775	-3.85997	-4.65528	-3.90288	-4.44162	-4.44411	-4.20167
4930444F02Rik	-3.95035	-4.02159	-4.39914	-4.14772	-3.82261	-5.27683	-4.76184	-4.21778	-3.91233	-4.83023	-4.11046	-4.8775	-3.85997	-4.65528	-3.90288	-4.44162	-4.44411	-4.20167
4930444G20Rik	-3.95035	-4.02159	-4.39914	-4.14772	-3.82261	-5.27683	-4.76184	-4.21778	-3.91233	-4.83023	-4.11046	-4.8775	-3.85997	-4.65528	-3.90288	-4.44162	-4.44411	-4.20167
4930444M15Rik	-3.95035	-4.02159	-4.39914	-4.14772	-3.82261	-5.27683	-4.76184	-4.21778	-3.91233	-4.83023	-4.11046	-4.8775	-3.85997	-4.65528	-3.90288	-4.44162	-4.44411	-4.20167
4930444P10Rik	-3.95035	-4.02159	-4.39914	-4.14772	-3.82261	-5.27683	-4.76184	-4.21778	-3.91233	-4.83023	-4.11046	-4.8775	-3.85997	-4.65528	-3.90288	-4.44162	-4.44411	-4.20167
4930447A16Rik	-3.95035	-4.02159	-4.39914	-4.14772	-3.82261	-5.27683	-4.76184	-4.21778	-3.91233	-4.83023	-4.11046	-4.8775	-3.85997	-4.65528	-3.90288	-4.44162	-4.44411	-4.20167
4930447C04Rik	-3.95035	-4.02159	-4.39914	-4.14772	-3.82261	-5.27683	-4.76184	-4.21778	-3.91233	-4.83023	-4.11046	-4.8775	-3.85997	1.49447	-3.90288	-4.44162	-4.44411	-4.20167
4930447J18Rik	-3.95035	-4.02159	-4.39914	-4.14772	-3.82261	-5.27683	-4.76184	-4.21778	-3.91233	-4.83023	-4.11046	-4.8775	-3.85997	-4.65528	-3.90288	-4.44162	-4.44411	-4.20167
4930447K03Rik	2.92002	-4.02159	4.07253	-4.14772	-3.82261	-5.27683	-4.76184	-4.21778	-2.32736	0.123964	-4.11046	-2.55557	-3.85997	-4.65528	-3.90288	-4.44162	-4.44411	4.02233
4930447N08Rik	-3.95035	-4.02159	-4.39914	-4.14772	-3.82261	-5.27683	-4.76184	-4.21778	-3.91233	-4.83023	-4.11046	-4.8775	-3.85997	-4.65528	-3.90288	-4.44162	-4.44411	-4.20167
4930448C13Rik	-3.95035	-4.02159	-4.39914	-4.14772	-3.82261	-5.27683	-4.76184	-4.21778	-3.91233	-4.83023	-4.11046	-4.8775	-3.85997	-4.65528	-3.90288	-4.44162	-4.44411	-4.20167
4930448F12Rik	-3.95035	-4.02159	-4.39914	-4.14772	-3.82261	-5.27683	-4.76184	-4.21778	-3.91233	-4.83023	-4.11046	-4.8775	-3.85997	-4.65528	-3.90288	-4.44162	-4.44411	-4.20167
4930448H16Rik	-3.95035	-4.02159	-4.39914	-4.14772	-3.82261	-5.27683	-4.76184	-4.21778	-3.91233	-4.83023	-4.11046	-4.8775	-3.85997	-4.65528	0.489438	-4.44162	-4.44411	-4.20167
4930448I06Rik	-3.95035	-4.02159	-4.39914	-4.14772	-3.82261	-5.27683	-4.76184	-4.21778	-3.91233	-4.83023	-4.11046	-4.8775	-3.85997	-4.65528	-3.90288	-4.44162	-4.44411	-4.20167
4930448I18Rik	-3.95035	-4.02159	-4.39914	-4.14772	-3.82261	-5.27683	-4.76184	-4.21778	-3.91233	-4.83023	-4.11046	-4.8775	-3.85997	-4.65528	-3.90288	-4.44162	-4.44411	-4.20167
4930448K20Rik	-3.95035	-4.02159	-4.39914	-4.14772	-3.82261	-5.27683	-4.76184	-4.21778	-3.91233	-4.83023	-4.11046	-4.8775	-3.85997	-4.65528	-3.90288	-4.44162	-4.44411	-4.20167
4930449E01Rik	-3.95035	-4.02159	-4.39914	-4.14772	-3.82261	-5.27683	-4.76184	-4.21778	-3.91233	-4.83023	-4.11046	-4.8775	-3.85997	-4.65528	-3.90288	-4.44162	-4.44411	-4.20167
4930449E18Rik	-3.95035	-4.02159	-4.39914	-4.14772	-3.82261	-5.27683	-4.76184	-4.21778	-3.91233	-4.83023	-4.11046	-4.8775	-3.85997	-4.65528	-3.90288	-4.44162	-4.44411	-4.20167
4930449I24Rik	-3.95035	-4.02159	-4.39914	-4.14772	-3.82261	-5.27683	-4.76184	-4.21778	-3.91233	-4.83023	-4.11046	-4.8775	-3.85997	-4.65528	-3.90288	-4.44162	-4.44411	-4.20167
4930451C15Rik	-3.95035	-4.02159	-4.39914	-4.14772	-3.82261	-5.27683	-4.76184	-4.21778	-3.91233	-4.83023	-4.11046	-4.8775	-3.85997	-4.65528	-3.90288	-4.44162	-4.44411	-4.20167
4930451G09Rik	-3.95035	-4.02159	-4.39914	-4.14772	-3.82261	0.912997	-4.76184	-4.21778	-3.91233	-4.83023	-4.11046	-4.8775	-3.85997	-4.65528	-1.09552	-4.44162	-4.44411	-4.20167
4930451I11Rik	-3.95035	-4.02159	-4.39914	-4.14772	-3.82261	-5.27683	-4.76184	-4.21778	-3.91233	-4.83023	-4.11046	-4.8775	-3.85997	-4.65528	-3.90288	-4.44162	-4.44411	-4.20167
4930452A19Rik	-3.95035	-4.02159	-4.39914	-4.14772	-3.82261	-5.27683	-4.76184	-4.21778	-3.91233	-4.83023	-4.11046	-4.8775	-3.85997	-4.65528	-3.90288	-4.44162	-4.44411	-4.20167
4930452B06Rik	-3.95035	-4.02159	-4.39914	-4.14772	-3.82261	-5.27683	-4.76184	-4.21778	-3.91233	-4.83023	-4.11046	-4.8775	-3.85997	-4.65528	-3.90288	-4.44162	-4.44411	-4.20167
4930452G13Rik	-3.95035	-4.02159	-4.39914	-4.14772	-3.82261	-5.27683	-4.76184	-4.21778	-3.91233	-4.83023	-4.11046	-4.8775	-3.85997	-4.65528	-3.90288	-4.44162	-4.44411	-4.20167
4930452N14Rik	-3.95035	-4.02159	-4.39914	-4.14772	-3.82261	-5.27683	-4.76184	-4.21778	-3.91233	-4.83023	-4.11046	-4.8775	-3.85997	-4.65528	-3.90288	-4.44162	-4.44411	-4.20167
4930453H23Rik	-3.95035	-4.02159	-4.39914	-4.14772	-3.82261	-5.27683	-4.76184	-4.21778	-3.91233	-4.83023	-4.11046	-4.8775	-3.85997	-4.65528	-3.90288	-4.44162	-4.44411	-4.20167
4930453L07Rik	-3.95035	-4.02159	-4.39914	-4.14772	-3.82261	-5.27683	-4.76184	-4.21778	-3.91233	-4.83023	-4.11046	-4.8775	-3.85997	-4.65528	-3.90288	-4.44162	-4.44411	-4.20167
4930453N24Rik	7.71454	7.32437	4.72239	3.90213	4.06613	3.34156	6.04793	-2.63281	7.0799	3.29389	3.72874	4.26971	-0.159531	4.04862	-3.90288	0.767835	3.96103	1.35292
4930455B14Rik	-3.95035	-4.02159	-4.39914	-4.14772	-3.82261	-5.27683	-4.76184	-4.21778	-3.91233	-4.83023	-4.11046	-4.8775	-3.85997	-4.65528	-3.90288	-4.44162	-4.44411	-4.20167
4930455C13Rik	1.80987	-4.02159	-4.39914	-2.56276	-3.82261	-2.9549	1.7223	-0.716974	-3.91233	-4.83023	-4.11046	-0.342688	-3.85997	-4.65528	-3.90288	-4.44162	-4.44411	-4.20167
4930455D15Rik	-3.95035	-4.02159	-4.39914	-4.14772	-3.82261	-5.27683	-4.76184	-4.21778	-3.91233	-4.83023	-4.11046	-4.8775	-3.85997	-4.65528	-3.90288	-4.44162	-4.44411	-4.20167
4930455F16Rik	-3.95035	-4.02159	-4.39914	-4.14772	-3.82261	-5.27683	-4.76184	-4.21778	-3.91233	-4.83023	-4.11046	-4.8775	-3.85997	-4.65528	-3.90288	-4.44162	-4.44411	-4.20167
4930455H04Rik	-3.95035	-4.02159	-4.39914	-4.14772	-3.82261	-5.27683	-4.76184	-4.21778	-3.91233	-4.83023	-4.11046	-4.8775	-3.85997	-4.65528	-3.90288	-4.44162	-4.44411	-4.20167
4930455J16Rik	-3.95035	-4.02159	-4.39914	-4.14772	-3.82261	-5.27683	-4.76184	-4.21778	-3.91233	-4.83023	-4.11046	-4.8775	-3.85997	-4.65528	-3.90288	-4.44162	-4.44411	-4.20167
4930456L15Rik	-3.95035	-4.02159	-4.39914	-4.14772	-3.82261	-5.27683	-4.76184	-4.21778	-3.91233	-4.83023	-4.11046	-4.8775	-3.85997	-4.65528	-3.90288	-4.44162	-4.44411	-4.20167
4930459C07Rik	-3.95035	-4.02159	-4.39914	-4.14772	-3.82261	-5.27683	-4.76184	-4.21778	-3.91233	-4.83023	-4.11046	-4.8775	-3.85997	-4.65528	-3.90288	-4.44162	-4.44411	-4.20167
4930459L07Rik	-3.95035	-4.02159	-4.39914	-4.14772	-3.82261	-5.27683	-4.76184	-4.21778	-3.91233	-4.83023	-4.11046	-4.8775	-3.85997	-4.65528	-3.90288	-4.44162	-4.44411	-4.20167
4930461G14Rik	-3.95035	-4.02159	-4.39914	-4.14772	-3.82261	-5.27683	-4.76184	-4.21778	-3.91233	-4.83023	-4.11046	-4.8775	-3.85997	-4.65528	-3.90288	-4.44162	-4.44411	-4.20167
4930463O16Rik	-3.95035	-4.02159	-4.39914	-4.14772	-3.82261	-5.27683	-4.76184	-4.21778	-3.91233	-4.83023	-4.11046	-4.8775	-3.85997	-4.65528	-3.90288	-4.44162	-4.44411	-4.20167
4930465K10Rik	-3.95035	-4.02159	-4.39914	-4.14772	-3.82261	-5.27683	-4.76184	-4.21778	-3.91233	-4.83023	-4.11046	-4.8775	-3.85997	-4.65528	-3.90288	-4.44162	-4.44411	-4.20167
4930465M20Rik	-3.95035	-4.02159	-4.39914	-4.14772	-3.82261	-5.27683	-4.76184	-4.21778	-3.91233	-4.83023	-4.11046	-4.8775	-3.85997	-4.65528	-3.90288	-4.44162	-4.44411	-4.20167
4930467D21Rik	-3.95035	-4.02159	-4.39914	-4.14772	-3.82261	-5.27683	-4.76184	-4.21778	-3.91233	-4.83023	-4.11046	-4.8775	-3.85997	-4.65528	-3.90288	-4.44162	-4.44411	-4.20167
4930467E23Rik	-3.95035	-4.02159	-4.39914	-4.14772	-3.82261	-5.27683	-4.76184	-4.21778	-3.91233	-4.83023	-4.11046	-4.8775	-3.85997	-4.65528	-3.90288	-4.44162	-4.44411	-4.20167
4930467K11Rik	-3.95035	-4.02159	-4.39914	-4.14772	-3.82261	-5.27683	-4.76184	-4.21778	-3.91233	-4.83023	-4.11046	-4.8775	-3.85997	-4.65528	-3.90288	-4.44162	-4.44411	-4.20167
4930468A15Rik	-3.95035	-4.02159	-4.39914	-4.14772	-3.82261	-5.27683	-4.76184	-4.21778	-3.91233	-4.83023	-4.11046	-4.8775	-3.85997	-4.65528	-3.90288	-4.44162	-4.44411	-4.20167
4930469G21Rik	-3.95035	-4.02159	-4.39914	-4.14772	-3.82261	-5.27683	-4.76184	-4.21778	-3.91233	-4.83023	-4.11046	-4.8775	-3.85997	-4.65528	-3.90288	-4.44162	-4.44411	-4.20167
4930470H14Rik	-3.95035	-4.02159	-4.39914	-2.56276	-3.82261	-3.69187	-3.17688	-2.63281	-3.91233	-2.5083	-2.5255	-2.07014	-1.53804	-4.65528	-3.90288	-2.11969	-1.63675	-4.20167
4930470P17Rik	-3.95035	-4.02159	-4.39914	-4.14772	-3.82261	-5.27683	-4.76184	-4.21778	-3.91233	-4.83023	-4.11046	-4.8775	-3.85997	-4.65528	-3.90288	-4.44162	-4.44411	-4.20167
4930471C04Rik	-3.95035	-4.02159	-4.39914	-4.14772	-3.82261	-5.27683	-4.76184	-4.21778	-3.91233	-4.83023	-4.11046	-4.8775	-3.85997	-4.65528	-3.90288	-4.44162	-4.44411	-4.20167
4930471G03Rik	-3.95035	-4.02159	-4.39914	-4.14772	-3.82261	-5.27683	-4.76184	-4.21778	-3.91233	-4.83023	-4.11046	-4.8775	-3.85997	-4.65528	-3.90288	-4.44162	-4.44411	-4.20167
4930471M09Rik	-3.95035	-4.02159	-4.39914	-4.14772	-3.82261	-5.27683	-4.76184	-4.21778	-3.91233	-4.83023	-4.11046	-4.8775	-3.85997	-4.65528	-3.90288	-4.44162	-4.44411	-4.20167
4930473A02Rik	-3.95035	0.932603	3.32196	-4.14772	-3.82261	2.61192	-1.30241	-4.21778	-1.5904	-4.83023	-4.11046	-2.07014	-3.85997	-1.19585	2.4009	-0.354156	-2.85915	-4.20167
4930473O22Rik	-3.95035	-4.02159	-4.39914	-4.14772	-3.82261	-5.27683	-4.76184	-4.21778	-3.91233	-4.83023	-4.11046	-4.8775	-3.85997	-4.65528	-3.90288	-4.44162	-4.44411	-4.20167
4930474G06Rik	-3.95035	-4.02159	-4.39914	-4.14772	-3.82261	-5.27683	-4.76184	-4.21778	-3.91233	-4.83023	-4.11046	-4.8775	-3.85997	-4.65528	-3.90288	-4.44162	-4.44411	-4.20167
4930474H20Rik	-3.95035	-4.02159	-4.39914	-4.14772	-3.82261	-5.27683	-4.76184	-4.21778	-3.91233	-4.83023	-4.11046	-4.8775	-3.85997	-4.65528	-3.90288	-4.44162	-4.44411	-4.20167
4930474M22Rik	-3.95035	-4.02159	-4.39914	-4.14772	-3.82261	-5.27683	-4.76184	-4.21778	-3.91233	-4.83023	-4.11046	-4.8775	-3.85997	-4.65528	-3.90288	-4.44162	-4.44411	-4.20167
4930474N05Rik	-3.95035	-4.02159	-4.39914	-4.14772	-3.82261	-5.27683	-4.76184	-4.21778	-3.91233	-4.83023	-4.11046	-4.8775	-3.85997	-4.65528	-3.90288	-4.44162	-4.44411	-4.20167
4930474N09Rik	-3.95035	-4.02159	-4.39914	-4.14772	-3.82261	-5.27683	-4.76184	-4.21778	-3.91233	-4.83023	-4.11046	-4.8775	-3.85997	-4.65528	-3.90288	-4.44162	-4.44411	-4.20167
4930478L05Rik	-3.95035	-4.02159	-4.39914	-4.14772	-3.82261	-5.27683	-4.76184	-4.21778	-3.91233	-4.83023	-4.11046	-4.8775	-3.85997	-4.65528	-3.90288	-4.44162	-4.44411	0.321894
4930478P22Rik	-3.95035	-4.02159	-4.39914	-4.14772	-3.82261	-5.27683	-4.76184	-4.21778	-3.91233	-4.83023	-4.11046	-4.8775	-3.85997	-4.65528	-3.90288	-4.44162	-4.44411	-4.20167
4930479D17Rik	-3.95035	-4.02159	2.10865	-4.14772	4.19419	-1.18937	-4.76184	-4.21778	-3.91233	-1.66031	-4.11046	1.49754	-3.85997	-4.65528	-3.90288	-4.44162	-4.44411	-4.20167
4930480E11Rik	-3.95035	-4.02159	-4.39914	-4.14772	-3.82261	-5.27683	-4.76184	-4.21778	-3.91233	-4.83023	-4.11046	-4.8775	-3.85997	-4.65528	-3.90288	-4.44162	-4.44411	-4.20167
4930480G23Rik	-3.95035	-4.02159	-4.39914	-4.14772	-3.82261	-5.27683	-4.76184	-4.21778	-3.91233	-4.83023	-4.11046	-4.8775	-3.85997	-4.65528	-3.90288	-4.44162	-4.44411	-4.20167
4930480K15Rik	-3.95035	-4.02159	-4.39914	-4.14772	-3.82261	-2.1069	0.664424	-4.21778	-3.91233	-4.83023	-4.11046	-4.8775	-3.85997	-4.65528	-3.90288	-4.44162	-4.44411	-4.20167
4930480M12Rik	-3.95035	-4.02159	-4.39914	-4.14772	-3.82261	-5.27683	-4.76184	-4.21778	-3.91233	-4.83023	-4.11046	-4.8775	-3.85997	-4.65528	-3.90288	-4.44162	-4.44411	-4.20167
4930481A15Rik	-1.14299	-4.02159	6.00706	-4.14772	-1.01526	3.07632	6.93382	2.19162	-0.452894	4.95604	3.12794	2.89729	1.81245	3.31626	5.81993	7.3885	5.97058	-1.87974
4930482G09Rik	-3.95035	-4.02159	-4.39914	-4.14772	-3.82261	-5.27683	-4.76184	-4.21778	-3.91233	-4.83023	-4.11046	-4.8775	-3.85997	-4.65528	-3.90288	-4.44162	-4.44411	-4.20167
4930483J18Rik	-3.95035	-4.02159	-4.39914	-4.14772	-3.82261	-5.27683	-4.76184	-4.21778	-3.91233	-4.83023	-4.11046	-4.8775	-3.85997	-4.65528	-3.90288	-4.44162	-4.44411	-4.20167
4930483K19Rik	-3.95035	-4.02159	-4.39914	-4.14772	-3.82261	-5.27683	-4.76184	-4.21778	-3.91233	-4.83023	-4.11046	-4.8775	-3.85997	-4.65528	-3.90288	-4.44162	-4.44411	-4.20167
4930483O08Rik	-3.95035	-4.02159	-4.39914	-4.14772	-3.82261	-5.27683	-4.76184	-4.21778	-3.91233	-4.83023	-4.11046	-4.8775	-3.85997	-4.65528	-3.90288	-4.44162	-4.44411	-4.20167
4930486F22Rik	-3.95035	-4.02159	-4.39914	-4.14772	-3.82261	-5.27683	-4.76184	-4.21778	-3.91233	-4.83023	-4.11046	-4.8775	-3.85997	-4.65528	-3.90288	-4.44162	-4.44411	-4.20167
4930486I03Rik	-3.95035	-4.02159	-4.39914	-4.14772	-3.82261	-5.27683	-4.76184	-4.21778	-3.91233	-4.83023	-4.11046	-4.8775	-3.85997	-4.65528	-3.90288	-4.44162	-4.44411	-4.20167
4930486L24Rik	-3.95035	-4.02159	-0.49225	-1.82579	-3.82261	-5.27683	-2.43991	-2.63281	-3.91233	0.66162	-4.11046	-2.55557	-3.85997	-4.65528	-3.90288	-4.44162	-4.44411	-4.20167
4930487D11Rik	-3.95035	-4.02159	-4.39914	-4.14772	-3.82261	-5.27683	-4.76184	-4.21778	-3.91233	-4.83023	-4.11046	-4.8775	-3.85997	-4.65528	-3.90288	-4.44162	-4.44411	-4.20167
4930487H11Rik	-3.95035	-4.02159	-4.39914	-4.14772	2.24348	-2.1069	-4.76184	-4.21778	-3.91233	-4.83023	-4.11046	-2.07014	-3.85997	-4.65528	-3.90288	-1.63426	-4.44411	1.2246
4930488B22Rik	-3.95035	-4.02159	-4.39914	-4.14772	-3.82261	-5.27683	-4.76184	-4.21778	-3.91233	-4.83023	-4.11046	-4.8775	-3.85997	-4.65528	-3.90288	-4.44162	-4.44411	-4.20167
4930488L21Rik	-3.95035	-4.02159	-4.39914	-4.14772	-3.82261	-5.27683	-4.76184	-4.21778	-3.91233	-4.83023	-4.11046	-4.8775	-3.85997	-4.65528	-3.90288	-4.44162	-4.44411	-4.20167
4930500F04Rik	-3.95035	-4.02159	-4.39914	-4.14772	-3.82261	-5.27683	-4.76184	-4.21778	-3.91233	-4.83023	-4.11046	-4.8775	-3.85997	-4.65528	-3.90288	-4.44162	-4.44411	-4.20167
4930500J02Rik	-3.95035	-4.02159	-4.39914	-4.14772	-3.82261	-5.27683	-4.76184	-4.21778	-3.91233	-4.83023	-4.11046	-4.8775	-3.85997	-4.65528	-3.90288	-4.44162	-4.44411	-4.20167
4930500L23Rik	-3.95035	-4.02159	-4.39914	-4.14772	-3.82261	-5.27683	-4.76184	-4.21778	-3.91233	-4.83023	-4.11046	-4.8775	-3.85997	-4.65528	-3.90288	-4.44162	-4.44411	-4.20167
4930502A04Rik	-3.95035	-4.02159	-4.39914	-4.14772	-3.82261	-5.27683	-4.76184	-4.21778	-3.91233	-4.83023	-4.11046	-4.8775	-3.85997	-4.65528	-3.90288	-4.44162	-4.44411	-4.20167
4930502E09Rik	-3.95035	-4.02159	-4.39914	-4.14772	-3.82261	-5.27683	-4.76184	-4.21778	-3.91233	-4.83023	-4.11046	-4.8775	-3.85997	-4.65528	-3.90288	-4.44162	-4.44411	0.0462599
4930502E18Rik	-3.95035	-4.02159	-4.39914	-4.14772	-3.82261	-5.27683	-4.76184	-4.21778	-3.91233	-4.83023	-4.11046	-4.8775	-3.85997	-4.65528	-3.90288	-4.44162	-4.44411	-4.20167
4930503B20Rik	-3.95035	-4.02159	-4.39914	-4.14772	-3.82261	-5.27683	-4.76184	-4.21778	-3.91233	-4.83023	-4.11046	-4.8775	-3.85997	-4.65528	-3.90288	-4.44162	-4.44411	-4.20167
4930503E14Rik	-3.95035	-4.02159	-4.39914	-4.14772	-3.82261	-5.27683	-4.76184	-4.21778	-3.91233	-4.83023	-4.11046	-4.8775	-3.85997	-4.65528	-3.90288	-4.44162	-4.44411	-4.20167
4930503E24Rik	-3.95035	-4.02159	-4.39914	-4.14772	-3.82261	-5.27683	-4.76184	-4.21778	-3.91233	-4.83023	-4.11046	-4.8775	-3.85997	-4.65528	-3.90288	-4.44162	-4.44411	-4.20167
4930503H13Rik	-3.95035	-4.02159	-4.39914	-4.14772	-3.82261	-5.27683	-4.76184	-4.21778	-3.91233	-4.83023	-4.11046	-4.8775	-3.85997	-4.65528	-3.90288	-4.44162	-4.44411	-4.20167
4930503L19Rik	0.137115	-4.02159	2.39528	-4.14772	-3.82261	3.35617	2.8004	-1.04785	6.72339	1.19214	1.01882	3.1055	4.21149	2.08619	4.73737	3.05823	4.34705	4.47429
4930503O07Rik	-3.95035	-4.02159	-4.39914	-4.14772	-3.82261	-5.27683	-4.76184	-4.21778	-3.91233	-4.83023	-4.11046	-4.8775	-3.85997	-4.65528	-3.90288	-4.44162	-4.44411	-4.20167
4930504O13Rik	-3.95035	-4.02159	-4.39914	-4.14772	-3.82261	-5.27683	-4.76184	-4.21778	-3.91233	-4.83023	-4.11046	-4.8775	-3.85997	-4.65528	-3.90288	-4.44162	-4.44411	-4.20167
4930505A04Rik	-3.95035	-4.02159	-4.39914	-4.14772	-3.82261	-5.27683	-4.76184	-4.21778	-3.91233	-4.83023	-4.11046	-4.8775	-3.85997	-4.65528	-3.90288	-4.44162	-4.44411	-4.20167
4930505G20Rik	-3.95035	-4.02159	-4.39914	-4.14772	-3.82261	-5.27683	-4.76184	-4.21778	-3.91233	-4.83023	-4.11046	-4.8775	-3.85997	-4.65528	-3.90288	-4.44162	-4.44411	-4.20167
4930506C21Rik	-3.95035	7.04113	-1.59179	0.100206	-1.50069	1.46464	-4.76184	-4.21778	-3.91233	0.214161	-2.5255	-2.07014	-0.400539	3.60682	-2.31792	-2.85666	0.0794536	-0.114205
4930506M07Rik	-1.62842	-4.02159	-4.39914	-4.14772	-3.82261	-2.1069	-4.76184	-4.21778	-3.91233	-4.83023	-4.11046	-4.8775	-3.85997	-4.65528	3.10835	-4.44162	-4.44411	-4.20167
4930507D05Rik	0.0640072	-4.02159	-2.07721	-4.14772	-3.82261	0.277761	-4.76184	-4.21778	-3.91233	-4.83023	-4.11046	-4.8775	-3.85997	1.94463	-3.90288	-4.44162	-4.44411	-4.20167
4930507D10Rik	-3.95035	-4.02159	-4.39914	-4.14772	-3.82261	-5.27683	-4.76184	-4.21778	-3.91233	-4.83023	-4.11046	-4.8775	-3.85997	-4.65528	-3.90288	-4.44162	-4.44411	-4.20167
4930509E16Rik	-3.95035	-4.02159	-4.39914	-4.14772	-3.82261	-5.27683	-4.76184	-4.21778	-3.91233	-4.83023	-4.11046	-4.8775	-3.85997	-4.65528	-3.90288	-4.44162	-4.44411	-4.20167
4930509J09Rik	-3.95035	-4.02159	-4.39914	-4.14772	-3.82261	-5.27683	-4.76184	-4.21778	-3.91233	-4.83023	-4.11046	-4.8775	-3.85997	-4.65528	-3.90288	-4.44162	-4.44411	-4.20167
4930509K18Rik	-3.95035	-4.02159	-4.39914	-4.14772	-3.82261	-5.27683	-4.76184	-4.21778	-3.91233	-4.83023	-4.11046	-4.8775	-3.85997	-4.65528	-3.90288	-4.44162	-4.44411	-4.20167
4930511A02Rik	-3.95035	-4.02159	-4.39914	-4.14772	-3.82261	-5.27683	-4.76184	-4.21778	-3.91233	-4.83023	-4.11046	-4.8775	-3.85997	-4.65528	-3.90288	-4.44162	-4.44411	-4.20167
4930511E03Rik	-3.95035	-4.02159	-4.39914	-4.14772	-3.82261	-5.27683	-4.76184	-4.21778	-3.91233	-4.83023	-4.11046	-4.8775	-3.85997	-4.65528	-3.90288	-4.44162	-4.44411	-4.20167
4930511M06Rik	-3.95035	-4.02159	-4.39914	-4.14772	-3.82261	-5.27683	-4.76184	-4.21778	-3.91233	-4.83023	-4.11046	-4.8775	-3.85997	-4.65528	-3.90288	-4.44162	-4.44411	-4.20167
4930512B01Rik	-3.95035	-4.02159	-4.39914	1.78302	-3.82261	0.395597	-4.76184	-2.63281	-3.91233	-4.83023	-4.11046	-2.55557	-2.27501	1.22736	0.184584	2.97623	4.15952	-4.20167
4930513D17Rik	-3.95035	-4.02159	-4.39914	-4.14772	-3.82261	-5.27683	-4.76184	-4.21778	-3.91233	-4.83023	-4.11046	-4.8775	-3.85997	-4.65528	-3.90288	-4.44162	-4.44411	-4.20167
4930513N10Rik	-3.95035	-4.02159	-4.39914	-4.14772	2.51724	-3.69187	-4.76184	-4.21778	2.23742	-4.83023	4.93666	-4.8775	-3.85997	-4.65528	-3.90288	-4.44162	-4.44411	-4.20167
4930513O06Rik	-3.95035	-4.02159	-4.39914	-4.14772	-3.82261	-5.27683	-4.76184	-4.21778	-3.91233	-4.83023	-4.11046	-4.8775	-3.85997	-4.65528	-3.90288	-4.44162	-4.44411	-4.20167
4930515B02Rik	-3.95035	-4.02159	-4.39914	-4.14772	-3.82261	-5.27683	-4.76184	-4.21778	-3.91233	-4.83023	-4.11046	-4.8775	-3.85997	-4.65528	-3.90288	-4.44162	-4.44411	-4.20167
4930515G01Rik	-3.95035	-4.02159	3.78573	-4.14772	-3.82261	1.56866	-3.17688	-4.21778	-2.32736	3.7128	2.87822	0.251786	-3.85997	-4.65528	-3.90288	-4.44162	-4.44411	-4.20167
4930515G16Rik	-3.95035	-4.02159	-4.39914	-4.14772	-3.82261	-5.27683	-4.76184	-4.21778	-3.91233	-4.83023	-4.11046	-4.8775	-3.85997	-4.65528	-3.90288	-4.44162	-4.44411	-4.20167
4930515L03Rik	-3.95035	-4.02159	-4.39914	-4.14772	-3.82261	-5.27683	-4.76184	-4.21778	-3.91233	-4.83023	-4.11046	-4.8775	-3.85997	-4.65528	-3.90288	-4.44162	-4.44411	-4.20167
4930515L19Rik	-3.95035	-4.02159	-4.39914	-4.14772	-3.82261	-5.27683	-4.76184	-4.21778	-3.91233	-4.83023	-4.11046	-4.8775	-3.85997	-4.65528	-3.90288	-4.44162	-4.44411	-4.20167
4930517E11Rik	-3.95035	-4.02159	-4.39914	-4.14772	-3.82261	-5.27683	-4.76184	-4.21778	-3.91233	-4.83023	-4.11046	-4.8775	-3.85997	-4.65528	-3.90288	-4.44162	-4.44411	-4.20167
4930518P08Rik	-3.95035	-4.02159	-4.39914	-4.14772	-3.82261	-5.27683	-4.76184	-4.21778	-3.91233	-4.83023	-4.11046	-4.8775	-3.85997	-4.65528	-3.90288	-4.44162	-4.44411	-4.20167
4930519D14Rik	-3.95035	-4.02159	-4.39914	-4.14772	-3.82261	-5.27683	-4.76184	-4.21778	-3.91233	-4.83023	-4.11046	-4.8775	-3.85997	-4.65528	-3.90288	-4.44162	-4.44411	-4.20167
4930519F09Rik	-3.95035	-4.02159	-4.39914	-4.14772	-3.82261	-5.27683	-4.76184	-4.21778	-3.91233	-4.83023	-4.11046	-4.8775	-3.85997	-4.65528	-3.90288	-4.44162	-4.44411	-4.20167
4930519F16Rik	-3.95035	-4.02159	-4.39914	-4.14772	-3.82261	-5.27683	-4.76184	-4.21778	-3.91233	-4.83023	-4.11046	-4.8775	-3.85997	-4.65528	-3.90288	-4.44162	-4.44411	-4.20167
4930519F24Rik	-3.95035	-4.02159	-4.39914	-4.14772	-3.82261	-5.27683	-4.76184	-4.21778	-3.91233	-4.83023	-4.11046	-4.8775	-3.85997	-4.65528	-3.90288	-4.44162	-4.44411	-4.20167
4930519G04Rik	-3.95035	-4.02159	-4.39914	-4.14772	-3.82261	-5.27683	-4.76184	-4.21778	-3.91233	-4.83023	-4.11046	-4.8775	-3.85997	-4.65528	-3.90288	-4.44162	-4.44411	-4.20167
4930519H02Rik	-3.95035	-4.02159	-4.39914	-4.14772	-3.82261	-5.27683	-4.76184	-4.21778	-3.91233	-4.83023	-4.11046	-4.8775	-3.85997	-4.65528	-3.90288	-4.44162	-4.44411	-4.20167
4930520O04Rik	-3.95035	-4.02159	-4.39914	-4.14772	-3.82261	-5.27683	-4.76184	-4.21778	-3.91233	-4.83023	-4.11046	-2.55557	-3.85997	-4.65528	-3.90288	-4.44162	-4.44411	-4.20167
4930520P13Rik	-3.95035	-4.02159	-4.39914	-4.14772	-3.82261	-5.27683	-4.76184	-4.21778	-3.91233	-4.83023	-4.11046	-4.8775	-3.85997	-4.65528	-3.90288	-4.44162	-4.44411	-4.20167
4930521E06Rik	-3.95035	-4.02159	-4.39914	-4.14772	-3.82261	-5.27683	-4.76184	-4.21778	-3.91233	-4.83023	-4.11046	-4.8775	-3.85997	-4.65528	-3.90288	-4.44162	-4.44411	-4.20167
4930522H14Rik	-3.95035	-4.02159	-4.39914	-4.14772	-3.82261	-5.27683	-4.76184	-4.21778	-3.91233	-4.83023	-4.11046	-4.8775	-3.85997	-4.65528	-3.90288	-4.44162	-4.44411	-4.20167
4930522O17Rik	-3.95035	-4.02159	-4.39914	-4.14772	-3.82261	-5.27683	-4.76184	-4.21778	-3.91233	-4.83023	-4.11046	-4.8775	-3.85997	-4.65528	-3.90288	-4.44162	-4.44411	-4.20167
4930523C07Rik	-3.95035	-4.02159	-4.39914	-4.14772	-3.82261	-5.27683	-4.76184	-4.21778	-3.91233	-4.83023	-4.11046	-4.8775	-3.85997	-4.65528	-3.90288	-4.44162	-4.44411	-4.20167
4930523O13Rik	-3.95035	-4.02159	-4.39914	-4.14772	-3.82261	-5.27683	-4.76184	-4.21778	-3.91233	-4.83023	-4.11046	-4.8775	-3.85997	-4.65528	-3.90288	-4.44162	-4.44411	-4.20167
4930524B15Rik	-3.95035	-4.02159	-4.39914	-4.14772	-3.82261	-5.27683	-4.76184	-4.21778	-3.91233	-4.83023	-4.11046	-4.8775	-3.85997	-4.65528	-3.90288	-4.44162	-4.44411	-4.20167
4930524C18Rik	-3.95035	-4.02159	-4.39914	-4.14772	-3.82261	-5.27683	-4.76184	-4.21778	-3.91233	-4.83023	-4.11046	-4.8775	-3.85997	-4.65528	-3.90288	-4.44162	-4.44411	-4.20167
4930524N10Rik	-3.95035	-4.02159	-4.39914	-4.14772	-3.82261	-5.27683	-4.76184	-4.21778	-3.91233	-4.83023	-4.11046	-4.8775	-3.85997	-4.65528	-3.90288	-4.44162	-4.44411	-4.20167
4930524O05Rik	-3.95035	-4.02159	-4.39914	-4.14772	-3.82261	-5.27683	-4.76184	-4.21778	-3.91233	-4.83023	-4.11046	-4.8775	-3.85997	-4.65528	-3.90288	-4.44162	-4.44411	-4.20167
4930524O08Rik	-3.95035	-4.02159	-4.39914	-4.14772	-3.82261	-5.27683	-4.76184	-4.21778	-3.91233	-4.83023	-4.11046	-4.8775	-3.85997	-4.65528	-3.90288	-4.44162	-4.44411	-4.20167
4930525D18Rik	-3.95035	-4.02159	-4.39914	-4.14772	-3.82261	-5.27683	-4.76184	-4.21778	-3.91233	-4.83023	-4.11046	-4.8775	-3.85997	-4.65528	-3.90288	-4.44162	-4.44411	-4.20167
4930525G20Rik	2.52539	-4.02159	4.31167	5.82526	2.51724	1.92284	-4.76184	0.174542	2.06495	2.22505	-2.5255	1.38929	-3.85997	-4.65528	-3.90288	-2.11969	-2.85915	-4.20167
4930525M21Rik	-3.95035	-4.02159	-4.39914	-4.14772	-3.82261	-5.27683	-4.76184	-4.21778	-3.91233	-4.83023	-4.11046	-4.8775	-3.85997	-4.65528	-3.90288	-4.44162	-4.44411	-4.20167
4930526I15Rik	3.20952	2.4862	-4.39914	-2.56276	-3.82261	2.48472	-4.76184	-4.21778	-2.32736	-4.83023	0.137466	-0.0195155	-3.85997	4.50711	-3.90288	-2.85666	-2.85915	-2.61671
4930526L06Rik	-3.95035	-4.02159	-4.39914	-4.14772	-3.82261	-5.27683	-4.76184	-4.21778	-3.91233	-4.83023	-4.11046	-4.8775	-3.85997	-4.65528	-3.90288	-4.44162	-4.44411	-4.20167
4930527F14Rik	-3.95035	-4.02159	-4.39914	-4.14772	-3.82261	-5.27683	-4.76184	-4.21778	-3.91233	-4.83023	-4.11046	-4.8775	-3.85997	-4.65528	-3.90288	-4.44162	-4.44411	-4.20167
4930527G23Rik	-3.95035	-4.02159	-4.39914	-4.14772	-3.82261	-5.27683	-4.76184	-4.21778	-3.91233	-4.83023	-4.11046	-4.8775	-3.85997	-4.65528	-3.90288	-4.44162	-4.44411	-4.20167
4930528A17Rik	-3.95035	-4.02159	-4.39914	-0.977796	-3.82261	-0.884511	-4.76184	-4.21778	-3.91233	-4.83023	-4.11046	-4.8775	-3.85997	-4.65528	-3.90288	-4.44162	-4.44411	-4.20167
4930528D03Rik	-3.95035	-4.02159	-4.39914	-4.14772	-3.82261	-5.27683	-4.76184	-4.21778	-3.91233	-4.83023	-4.11046	-4.8775	-3.85997	-4.65528	-3.90288	-4.44162	-2.85915	-4.20167
4930528P14Rik	-3.95035	-4.02159	-4.39914	-4.14772	-3.82261	-5.27683	-4.76184	-4.21778	-3.91233	-4.83023	-4.11046	-4.8775	-3.85997	-4.65528	-3.90288	-4.44162	-4.44411	-4.20167
4930529C04Rik	-3.95035	-4.02159	-4.39914	-4.14772	-3.82261	-5.27683	-4.76184	-4.21778	-3.91233	-4.83023	-4.11046	-4.8775	-3.85997	-4.65528	-3.90288	-4.44162	-4.44411	-4.20167
4930529K09Rik	-3.95035	-4.02159	-4.39914	-4.14772	-3.82261	-5.27683	-4.76184	-4.21778	-3.91233	-4.83023	-4.11046	-4.8775	-3.85997	-4.65528	-3.90288	-4.44162	-4.44411	-4.20167
4930529L06Rik	-3.95035	-4.02159	-4.39914	-4.14772	-3.82261	-5.27683	-4.76184	-4.21778	-3.91233	-4.83023	-4.11046	-4.8775	-3.85997	-4.65528	-3.90288	-4.44162	-4.44411	-4.20167
4930529M08Rik	-3.95035	-4.02159	-4.39914	-4.14772	-3.82261	-5.27683	-4.76184	-4.21778	-3.91233	-4.83023	-4.11046	-4.8775	-3.85997	-4.65528	-3.90288	-4.44162	-4.44411	-4.20167
4930532M18Rik	-3.95035	-4.02159	-4.39914	-4.14772	-3.82261	-5.27683	-4.76184	-4.21778	-3.91233	-4.83023	-4.11046	-4.8775	-3.85997	-4.65528	-3.90288	-4.44162	-4.44411	-4.20167
4930533B01Rik	-3.95035	-4.02159	-4.39914	-4.14772	-3.82261	-5.27683	-4.76184	-4.21778	-3.91233	-4.83023	-4.11046	-4.8775	-3.85997	-4.65528	-0.732954	-4.44162	-4.44411	-4.20167
4930533P14Rik	-3.95035	-4.02159	-4.39914	-4.14772	-3.82261	-5.27683	-4.76184	-4.21778	-3.91233	-4.83023	-4.11046	-4.8775	-3.85997	-4.65528	-3.90288	-4.44162	-4.44411	-4.20167
4930538K18Rik	-3.95035	-4.02159	-4.39914	-4.14772	-3.82261	-5.27683	-4.76184	-4.21778	-3.91233	-4.83023	-4.11046	-4.8775	3.23806	-4.65528	-0.202439	-4.44162	-4.44411	-0.501228
4930539C22Rik	-3.95035	-4.02159	-4.39914	-4.14772	-3.82261	-5.27683	-4.76184	-4.21778	-3.91233	-4.83023	-4.11046	-4.8775	-3.85997	-4.65528	-3.90288	-4.44162	-4.44411	-4.20167
4930539E08Rik	-3.95035	-2.43663	7.72595	-4.14772	-3.82261	2.25455	-4.76184	-4.21778	3.70973	1.57916	-4.11046	-4.8775	-3.85997	-4.65528	-3.90288	-2.85666	-2.12218	-4.20167
4930539J05Rik	2.07202	-4.02159	-4.39914	-4.14772	-3.82261	-0.521941	-4.76184	-4.21778	-3.91233	-4.83023	-4.11046	-4.8775	-3.85997	-4.65528	-3.90288	-4.44162	-4.44411	-4.20167
4930539M17Rik	-3.95035	-4.02159	-4.39914	-4.14772	-3.82261	-5.27683	-4.76184	-4.21778	-3.91233	-4.83023	-4.11046	-4.8775	-3.85997	-4.65528	-3.90288	-4.44162	-4.44411	-4.20167
4930539N22Rik	-3.95035	-4.02159	-4.39914	-4.14772	-3.82261	-5.27683	-4.76184	-4.21778	-3.91233	-4.83023	-4.11046	-4.8775	-3.85997	-4.65528	-3.90288	-4.44162	-4.44411	-4.20167
4930540M03Rik	-3.95035	-4.02159	-4.39914	-4.14772	-3.82261	-5.27683	-4.76184	-4.21778	-3.91233	-4.83023	-4.11046	-4.8775	-3.85997	-4.65528	-3.90288	-4.44162	-4.44411	-4.20167
4930542C21Rik	-3.95035	-4.02159	-4.39914	-4.14772	-3.82261	-5.27683	-4.76184	-4.21778	-3.91233	-4.83023	-4.11046	-4.8775	-3.85997	-4.65528	-3.90288	-4.44162	-4.44411	-4.20167
4930542D17Rik	-3.95035	-4.02159	-4.39914	-4.14772	-3.82261	-5.27683	-4.76184	-4.21778	-3.91233	-4.83023	-4.11046	-4.8775	-3.85997	-4.65528	-3.90288	-4.44162	-4.44411	-4.20167
4930543E12Rik	-3.95035	-4.02159	-4.39914	-4.14772	-3.82261	-5.27683	-4.76184	-4.21778	-3.91233	-4.83023	-4.11046	-4.8775	-3.85997	-4.65528	-3.90288	-4.44162	-4.44411	-4.20167
4930544D05Rik	-3.95035	-4.02159	-4.39914	-4.14772	-3.82261	-5.27683	-4.76184	-4.21778	-3.91233	-4.83023	-4.11046	-4.8775	-3.85997	-4.65528	-3.90288	-4.44162	-4.44411	-4.20167
4930544G11Rik	-3.95035	-4.02159	-4.39914	-4.14772	-3.82261	-5.27683	-4.76184	-4.21778	-3.91233	-4.83023	-4.11046	-4.8775	-3.85997	-4.65528	-3.90288	-4.44162	-4.44411	-4.20167
4930544M13Rik	-3.95035	-4.02159	-4.39914	-4.14772	-3.82261	-5.27683	-4.76184	-4.21778	-3.91233	-4.83023	-4.11046	-4.8775	-3.85997	-4.65528	-3.90288	-4.44162	-4.44411	-4.20167
4930545E07Rik	-3.95035	-4.02159	-4.39914	-4.14772	-3.82261	-5.27683	-4.76184	-4.21778	-3.91233	-4.83023	-4.11046	-4.8775	-3.85997	-4.65528	-3.90288	-4.44162	-4.44411	-4.20167
4930545H06Rik	-3.95035	-4.02159	-4.39914	-4.14772	-3.82261	-5.27683	-4.76184	-4.21778	-3.91233	-4.83023	-4.11046	-4.8775	-3.85997	-4.65528	-3.90288	-4.44162	-4.44411	-4.20167
4930545L23Rik	-3.95035	-4.02159	-4.39914	-4.14772	-3.82261	-5.27683	-4.76184	-4.21778	-3.91233	-4.83023	-4.11046	-4.8775	-3.85997	-4.65528	-3.90288	-4.44162	-4.44411	-4.20167
4930546C10Rik	-3.95035	-4.02159	-4.39914	-4.14772	-3.82261	-5.27683	-4.76184	-4.21778	-3.91233	-4.83023	-4.11046	-4.8775	-3.85997	-4.65528	-3.90288	-4.44162	-4.44411	-4.20167
4930546K05Rik	-3.95035	-4.02159	-4.39914	-4.14772	-3.82261	-5.27683	-4.76184	-4.21778	-3.91233	-4.83023	-4.11046	-4.8775	-3.85997	-4.65528	-3.90288	-4.44162	-4.44411	-4.20167
4930547E08Rik	-3.95035	-4.02159	-4.39914	-4.14772	-3.82261	-5.27683	0.910585	-4.21778	-3.91233	-4.83023	-4.11046	-4.8775	-3.85997	-4.65528	-3.90288	-4.44162	-4.44411	-4.20167
4930547E14Rik	-3.95035	-4.02159	-4.39914	-4.14772	-3.82261	-5.27683	-4.76184	-4.21778	-3.91233	-4.83023	-4.11046	-4.8775	-3.85997	-4.65528	-3.90288	-4.44162	-4.44411	-4.20167
4930548G14Rik	-3.95035	-4.02159	-4.39914	-4.14772	-3.82261	-5.27683	-4.76184	-4.21778	-3.91233	-4.83023	-4.11046	-4.8775	-3.85997	-4.65528	-3.90288	-4.44162	-4.44411	-4.20167
4930548H24Rik	-3.95035	-4.02159	0.958412	-4.14772	-3.82261	-5.27683	-4.76184	-4.21778	-3.91233	-4.83023	-4.11046	-4.8775	-3.85997	-4.65528	-3.90288	-4.44162	-4.44411	-4.20167
4930548J01Rik	-3.95035	-4.02159	-4.39914	-4.14772	-3.82261	-5.27683	-4.76184	-4.21778	-3.91233	-4.83023	-4.11046	-4.8775	-3.85997	-4.65528	-3.90288	-4.44162	-4.44411	-4.20167
4930548K13Rik	-3.95035	-4.02159	-4.39914	-4.14772	-3.82261	-5.27683	-4.76184	-4.21778	-3.91233	-4.83023	-4.11046	-4.8775	-3.85997	-4.65528	-3.90288	-4.44162	-4.44411	-4.20167
4930549C01Rik	-3.95035	-4.02159	-4.39914	-4.14772	-3.82261	-5.27683	-4.76184	-4.21778	-3.91233	-4.83023	-4.11046	-4.8775	-3.85997	-4.65528	-3.90288	-4.44162	-4.44411	-4.20167
4930549G23Rik	-3.95035	-4.02159	-4.39914	-4.14772	-3.82261	-5.27683	-4.76184	-4.21778	-3.91233	-4.83023	-4.11046	-4.8775	-3.85997	-4.65528	-3.90288	-4.44162	-4.44411	-4.20167
4930550C14Rik	-3.95035	-4.02159	-4.39914	2.11907	-3.82261	3.53374	5.68421	-4.21778	-3.91233	-4.83023	-4.11046	-4.8775	-3.85997	-4.65528	-3.90288	-4.44162	-4.44411	-4.20167
4930550L24Rik	-3.95035	-4.02159	-4.39914	-4.14772	-3.82261	-5.27683	-4.76184	-4.21778	-3.91233	-4.83023	-4.11046	-4.8775	-3.85997	-4.65528	-3.90288	-4.44162	-4.44411	-4.20167
4930552N02Rik	-3.95035	-4.02159	-4.39914	-4.14772	-3.82261	-5.27683	-4.76184	-4.21778	-3.91233	-4.83023	-4.11046	-4.8775	-3.85997	-4.65528	-3.90288	-4.44162	-4.44411	-4.20167
4930552P12Rik	-3.95035	-4.02159	-4.39914	-4.14772	-3.82261	-1.18937	-4.76184	-4.21778	-3.91233	-4.83023	-4.11046	-1.17706	-3.85997	-4.65528	-3.90288	-4.44162	-4.44411	-4.20167
4930553E22Rik	-3.95035	-4.02159	-4.39914	-4.14772	-3.82261	-5.27683	-4.76184	-4.21778	-3.91233	-4.83023	-4.11046	-4.8775	-3.85997	-4.65528	-3.90288	-4.44162	-4.44411	-4.20167
4930554C24Rik	-3.95035	-4.02159	-4.39914	-4.14772	-3.82261	-5.27683	-4.76184	-4.21778	-3.91233	-4.83023	-4.11046	-4.8775	-3.85997	-4.65528	-3.90288	-4.44162	-4.44411	-4.20167
4930555B11Rik	-3.95035	-4.02159	-4.39914	-4.14772	-3.82261	-5.27683	-4.76184	-4.21778	-3.91233	-4.83023	-4.11046	-4.8775	-3.85997	-4.65528	-3.90288	-4.44162	-4.44411	-4.20167
4930555G01Rik	-3.95035	-4.02159	-4.39914	-4.14772	-3.82261	-5.27683	-4.76184	-4.21778	-3.91233	-4.83023	-1.78853	-4.8775	-3.85997	-4.65528	-3.90288	-4.44162	-4.44411	-4.20167
4930556C24Rik	-3.95035	-4.02159	-4.39914	-4.14772	-3.82261	-5.27683	-4.76184	-4.21778	-3.91233	-4.83023	-4.11046	-4.8775	-3.85997	-4.65528	-3.90288	-4.44162	-4.44411	-4.20167
4930556G01Rik	-3.95035	-4.02159	-4.39914	-4.14772	-3.82261	-5.27683	-4.76184	-4.21778	-3.91233	-4.83023	-4.11046	-4.8775	-3.85997	-4.65528	-3.90288	-4.44162	-4.44411	-4.20167
4930556J02Rik	-3.95035	-4.02159	-4.39914	-4.14772	-3.82261	-5.27683	-4.76184	-4.21778	-3.91233	-4.83023	-4.11046	-4.8775	-3.85997	-4.65528	-3.90288	-4.44162	-4.44411	-4.20167
4930556M19Rik	-3.95035	-4.02159	-4.39914	-4.14772	-3.82261	-5.27683	-4.76184	-4.21778	-3.91233	-4.83023	-4.11046	-4.8775	-3.85997	-4.65528	-3.90288	-4.44162	-4.44411	-4.20167
4930556N09Rik	-3.95035	-4.02159	-4.39914	-4.14772	-3.82261	-5.27683	-4.76184	-4.21778	-3.91233	-4.83023	-4.11046	-4.8775	-3.85997	-4.65528	-3.90288	-4.44162	-4.44411	-4.20167
4930557A04Rik	-3.95035	-4.02159	-4.39914	-4.14772	-3.82261	-5.27683	-4.76184	-4.21778	-3.91233	-4.83023	-4.11046	-4.8775	-3.85997	-4.65528	-3.90288	-4.44162	-4.44411	-4.20167
4930557J02Rik	-3.95035	-4.02159	-4.39914	-4.14772	-3.82261	-5.27683	-4.76184	-4.21778	-3.91233	-4.83023	-4.11046	-4.8775	-3.85997	-4.65528	-3.90288	-4.44162	-4.44411	-4.20167
4930558C23Rik	-3.95035	-4.02159	-4.39914	-4.14772	-3.82261	-5.27683	-4.76184	-4.21778	-3.91233	-4.83023	-4.11046	-4.8775	-3.85997	-4.65528	-3.90288	-4.44162	-4.44411	-4.20167
4930558G05Rik	-3.95035	-4.02159	-4.39914	-4.14772	-3.82261	-5.27683	-4.76184	-4.21778	-3.91233	-4.83023	-4.11046	-4.8775	-3.85997	-4.65528	-3.90288	-4.44162	-4.44411	-4.20167
4930558J18Rik	-3.95035	-4.02159	-4.39914	-4.14772	-3.82261	-5.27683	-4.76184	-4.21778	-3.91233	-4.83023	-4.11046	-4.8775	-3.85997	-4.65528	-3.90288	-4.44162	-4.44411	-4.20167
4930558K02Rik	-3.95035	-4.02159	-4.39914	-4.14772	-3.82261	-5.27683	-4.76184	-4.21778	-3.91233	-4.83023	-4.11046	-4.8775	-3.85997	-4.65528	-3.90288	-4.44162	-4.44411	-4.20167
4930562C15Rik	-3.95035	-4.02159	-4.39914	-4.14772	-3.82261	-5.27683	-4.76184	-4.21778	-3.91233	-4.83023	-4.11046	-4.8775	-3.85997	-4.65528	-3.90288	-4.44162	-4.44411	-4.20167
4930562F07Rik	-3.95035	-4.02159	-4.39914	-4.14772	-3.82261	-5.27683	-4.76184	-4.21778	-3.91233	-4.83023	-4.11046	-4.8775	-3.85997	-4.65528	-3.90288	-4.44162	-4.44411	-4.20167
4930563D23Rik	-3.95035	-4.02159	-4.39914	-4.14772	-3.82261	-5.27683	-4.76184	-4.21778	-3.91233	-4.83023	-4.11046	-4.8775	-3.85997	-4.65528	-3.90288	-4.44162	-4.44411	-4.20167
4930563E18Rik	-3.95035	-4.02159	-4.39914	-4.14772	-3.82261	-5.27683	-4.76184	6.62536	-3.91233	-4.83023	-2.5255	-4.8775	-3.85997	-4.65528	-3.90288	-4.44162	-4.44411	-4.20167
4930563E22Rik	-3.95035	-1.69967	-4.39914	-2.56276	-1.50069	-1.57639	-4.76184	-4.21778	-3.91233	3.65761	4.72559	-4.8775	-2.27501	5.80313	-2.31792	-2.85666	5.63937	5.35867
4930563F08Rik	-3.95035	-4.02159	-4.39914	-4.14772	-3.82261	-5.27683	-4.76184	-4.21778	-3.91233	-4.83023	-4.11046	-4.8775	-3.85997	-4.65528	-3.90288	-4.44162	-4.44411	-4.20167
4930563M20Rik	-3.95035	-4.02159	-4.39914	-4.14772	-3.82261	-5.27683	-4.76184	-4.21778	-3.91233	-4.83023	-4.11046	-4.8775	-3.85997	-4.65528	-3.90288	-4.44162	-4.44411	-4.20167
4930564B18Rik	-3.95035	-4.02159	-4.39914	-4.14772	-3.82261	-5.27683	-4.76184	-4.21778	-3.91233	-4.83023	-4.11046	-4.8775	-3.85997	-4.65528	-3.90288	-4.44162	-4.44411	-4.20167
4930564C03Rik	-3.95035	-2.43663	-4.39914	-4.14772	-3.82261	-2.1069	-4.76184	-4.21778	-3.91233	1.67756	-2.5255	-4.8775	1.81245	-4.65528	4.82163	-2.85666	-4.44411	-2.61671
4930564D02Rik	-3.95035	-4.02159	-4.39914	-4.14772	-3.82261	-5.27683	-4.76184	-4.21778	-3.91233	-4.83023	-4.11046	-4.8775	-3.85997	-4.65528	-3.90288	-4.44162	-4.44411	-4.20167
4930565D16Rik	-3.95035	-4.02159	-4.39914	-4.14772	-3.82261	-5.27683	-4.76184	-4.21778	-3.91233	-4.83023	-4.11046	-4.8775	-3.85997	-4.65528	-3.90288	-4.44162	-4.44411	-4.20167
4930565N06Rik	3.4675	5.66316	5.9396	8.35337	-0.363182	6.16248	6.18726	-2.63281	1.04187	3.65761	5.76144	6.57217	4.00422	-3.07032	1.14151	6.29901	7.38839	5.46189
4930567H12Rik	-3.95035	-4.02159	-4.39914	-4.14772	-3.82261	-5.27683	-4.76184	-4.21778	-3.91233	-4.83023	-4.11046	-4.8775	-3.85997	-4.65528	-3.90288	-4.44162	-4.44411	-4.20167
4930567H17Rik	-3.95035	-4.02159	-4.39914	-4.14772	-3.82261	-5.27683	-4.76184	-4.21778	-3.91233	-4.83023	-4.11046	-4.8775	-3.85997	-4.65528	-3.90288	-4.44162	-4.44411	-4.20167
4930567J20Rik	-3.95035	-4.02159	-4.39914	-4.14772	-3.82261	-5.27683	-4.76184	-4.21778	-3.91233	-4.83023	-4.11046	-4.8775	-3.85997	-4.65528	-3.90288	-4.44162	-4.44411	-4.20167
4930567K20Rik	-3.95035	-4.02159	-4.39914	-4.14772	-3.82261	-5.27683	-4.76184	-4.21778	-3.91233	-4.83023	-4.11046	-4.8775	-3.85997	-4.65528	-3.90288	-4.44162	-4.44411	-4.20167
4930568D16Rik	-3.95035	-4.02159	-4.39914	-4.14772	-3.82261	-5.27683	-4.76184	-4.21778	-3.91233	-4.83023	-4.11046	-4.8775	-3.85997	-4.65528	-3.90288	-4.44162	-4.44411	-4.20167
4930568E12Rik	-3.95035	-4.02159	-4.39914	-4.14772	-3.82261	-5.27683	-4.76184	-4.21778	-3.91233	-4.83023	-4.11046	-4.8775	-3.85997	-4.65528	-3.90288	-4.44162	-4.44411	-4.20167
4930568G15Rik	-3.95035	-4.02159	-4.39914	-4.14772	-3.82261	-5.27683	-4.76184	-4.21778	-3.91233	-4.83023	-4.11046	-4.8775	-3.85997	-4.65528	-3.90288	-4.44162	-4.44411	-4.20167
4930570G19Rik	-3.95035	-4.02159	-4.39914	-4.14772	-3.82261	-5.27683	-4.76184	-4.21778	-3.91233	-4.83023	-4.11046	-4.8775	-3.85997	-4.65528	-3.90288	-4.44162	-4.44411	-4.20167
4930571K23Rik	-3.95035	-4.02159	-4.39914	-4.14772	-3.82261	-5.27683	-4.76184	-4.21778	-3.91233	-4.83023	-4.11046	-4.8775	-3.85997	-4.65528	-3.90288	-4.44162	-4.44411	-4.20167
4930571O06Rik	-3.95035	-4.02159	-4.39914	-4.14772	-3.82261	-5.27683	-4.76184	-4.21778	-3.91233	-4.83023	-4.11046	-4.8775	-3.85997	-4.65528	-3.90288	-4.44162	-4.44411	-4.20167
4930572K03Rik	-3.95035	-4.02159	-4.39914	-4.14772	-3.82261	-5.27683	-4.76184	-4.21778	-3.91233	-4.83023	-4.11046	-4.8775	-3.85997	-4.65528	-3.90288	-4.44162	-4.44411	-4.20167
4930572O03Rik	-3.95035	-4.02159	-4.39914	-4.14772	-3.82261	-5.27683	-4.76184	-4.21778	-3.91233	-4.83023	-4.11046	-4.8775	-3.85997	-4.65528	-3.90288	-4.44162	-4.44411	-4.20167
4930572O13Rik	-3.95035	-4.02159	-4.39914	-4.14772	-3.82261	-5.27683	-4.76184	-4.21778	-3.91233	-4.83023	-4.11046	-4.8775	-3.85997	-4.65528	-3.90288	-4.44162	-4.44411	-4.20167
4930573O16Rik	-3.95035	-4.02159	-4.39914	-4.14772	-3.82261	-5.27683	-4.76184	-4.21778	-3.91233	-4.83023	-4.11046	-4.8775	-3.85997	-4.65528	-3.90288	-4.44162	-4.44411	-4.20167
4930577N17Rik	-3.95035	-4.02159	-4.39914	4.29107	-3.82261	2.21085	-4.76184	-1.04785	-0.0054351	3.61685	1.91191	0.882192	3.61219	-4.65528	-1.07913	2.00695	-4.44411	-0.238194
4930578C19Rik	-3.95035	-4.02159	-4.39914	-4.14772	-3.82261	-5.27683	-4.76184	-4.21778	-3.91233	-4.83023	-4.11046	-4.8775	-3.85997	-4.65528	-3.90288	-4.44162	-4.44411	-4.20167
4930578E11Rik	-3.95035	-4.02159	-4.39914	-4.14772	-3.82261	-5.27683	-4.76184	-4.21778	-3.91233	-4.83023	-4.11046	-4.8775	-3.85997	-4.65528	-3.90288	-4.44162	-4.44411	-4.20167
4930578I06Rik	-3.95035	-4.02159	-4.39914	-4.14772	-3.82261	-5.27683	-4.76184	-4.21778	-3.91233	-4.83023	-4.11046	-4.8775	-3.85997	-4.65528	-3.90288	-4.44162	-4.44411	-4.20167
4930578M01Rik	-3.95035	-4.02159	-4.39914	-4.14772	-3.82261	-2.1069	-4.76184	-4.21778	-3.91233	-4.83023	-4.11046	-4.8775	-3.85997	-4.65528	-3.90288	-4.44162	-4.44411	-4.20167
4930578N18Rik	-3.95035	-4.02159	-4.39914	-4.14772	-3.82261	-5.27683	-4.76184	-4.21778	-3.91233	-4.83023	-4.11046	-4.8775	-3.85997	-4.65528	-3.90288	-4.44162	-4.44411	-4.20167
4930579F01Rik	-3.95035	-4.02159	-4.39914	-4.14772	-3.82261	-5.27683	-4.76184	-4.21778	-3.91233	-4.83023	-4.11046	-4.8775	-3.85997	-4.65528	-3.90288	-4.44162	-4.44411	-4.20167
4930579G18Rik	-3.95035	-4.02159	-4.39914	-4.14772	-1.01526	-0.521941	-4.76184	-4.21778	-3.91233	-4.83023	-4.11046	-4.8775	3.70227	-4.65528	-3.90288	-4.44162	-4.44411	-4.20167
4930579G24Rik	-3.95035	-4.02159	-4.39914	-4.14772	-3.82261	-1.8174	5.32695	-4.21778	-3.91233	-2.5083	-4.11046	2.72983	-3.85997	-4.65528	-3.90288	-4.44162	-4.44411	-4.20167
4930579K19Rik	-2.36539	-4.02159	-4.39914	-4.14772	-3.82261	-1.36994	-4.76184	-4.21778	-3.91233	-2.5083	-4.11046	2.65388	-3.85997	-3.07032	-3.90288	-4.44162	-4.44411	-2.61671
4930581F22Rik	2.15818	0.0658693	3.41464	-4.14772	-3.82261	1.23097	1.83807	4.86171	3.3823	0.951127	-1.30311	3.41252	-0.690046	2.71104	-1.09552	3.70304	2.35031	-1.03174
4930583K01Rik	-3.95035	-4.02159	-4.39914	-4.14772	-3.82261	-5.27683	-4.76184	-4.21778	-3.91233	-4.83023	-4.11046	-4.8775	-3.85997	-4.65528	-3.90288	-4.44162	-4.44411	-4.20167
4930583P06Rik	-3.95035	-4.02159	-4.39914	-4.14772	-3.82261	-5.27683	-4.76184	-4.21778	-3.91233	-4.83023	-4.11046	-4.8775	-3.85997	-4.65528	-3.90288	-4.44162	-4.44411	-4.20167
4930584F24Rik	-3.95035	-4.02159	-4.39914	-4.14772	-3.82261	-5.27683	-4.76184	-4.21778	-3.91233	-4.83023	-4.11046	-4.8775	-3.85997	-4.65528	-3.90288	-4.44162	-4.44411	-4.20167
4930590J08Rik	-3.95035	-4.02159	-4.39914	-4.14772	-3.82261	-5.27683	-4.76184	-4.21778	-3.91233	-4.83023	-4.11046	-4.8775	-3.85997	-4.65528	-3.90288	-4.44162	-4.44411	-4.20167
4930590L20Rik	-3.95035	-4.02159	-4.39914	-4.14772	-3.82261	-5.27683	-4.76184	-4.21778	-3.91233	-4.83023	-4.11046	-4.8775	-3.85997	-4.65528	-3.90288	-4.44162	-4.44411	-4.20167
4930591A17Rik	-3.95035	-4.02159	-4.39914	-4.14772	-3.82261	-5.27683	-4.76184	-4.21778	-3.91233	-4.83023	-4.11046	-4.8775	-3.85997	-4.65528	-3.90288	-4.44162	-4.44411	-4.20167
4930592A05Rik	-3.95035	-4.02159	-4.39914	-4.14772	-3.82261	-5.27683	-4.76184	-4.21778	-3.91233	-4.83023	-4.11046	-4.8775	-3.85997	-4.65528	-3.90288	-4.44162	-4.44411	-4.20167
4930592I03Rik	-3.95035	-4.02159	-4.39914	-4.14772	-3.82261	0.00857418	-4.76184	-4.21778	-3.91233	-4.83023	0.4131	-4.8775	-3.85997	-4.65528	-3.90288	-4.44162	-4.44411	-4.20167
4930593A02Rik	-3.95035	-4.02159	-4.39914	-4.14772	-3.82261	-5.27683	-4.76184	-4.21778	-3.91233	-4.83023	-4.11046	-4.8775	-3.85997	-4.65528	-3.90288	-4.44162	-4.44411	-4.20167
4930593C16Rik	-3.95035	-4.02159	-4.39914	-4.14772	-3.82261	-5.27683	-4.76184	-4.21778	-3.91233	-4.83023	-4.11046	-4.8775	-3.85997	-4.65528	-3.90288	-4.44162	-4.44411	-4.20167
4930594C11Rik	6.90218	4.49016	5.29956	5.61217	5.58465	6.42924	7.94746	4.28605	5.91898	7.51822	5.30528	6.78027	7.24135	4.16809	3.44585	3.64053	4.2598	6.4681
4930595M18Rik	-3.95035	-4.02159	-4.39914	-4.14772	-3.82261	-5.27683	-4.76184	-4.21778	-3.91233	-4.83023	-4.11046	-4.8775	-3.85997	-4.65528	-3.90288	-4.44162	-4.44411	-4.20167
4930596D02Rik	-3.95035	-4.02159	-4.39914	-4.14772	-3.82261	-5.27683	-4.76184	-4.21778	-3.91233	-4.83023	-4.11046	-4.8775	-3.85997	-4.65528	-3.90288	-4.44162	-4.44411	-4.20167
4930596I21Rik	-3.95035	-4.02159	-4.39914	-4.14772	-3.82261	-1.57639	-4.76184	-4.21778	-3.91233	0.527319	-4.11046	-4.8775	-3.85997	-1.84792	-3.90288	-4.44162	-4.44411	-4.20167
4930597G03Rik	-3.95035	-4.02159	-4.39914	-4.14772	-3.82261	-5.27683	-4.76184	-4.21778	-3.91233	-4.83023	-4.11046	-4.8775	-3.85997	-4.65528	-3.90288	-4.44162	-4.44411	-4.20167
4930598F16Rik	-3.95035	-4.02159	-4.39914	-4.14772	-3.82261	-5.27683	-4.76184	-4.21778	-3.91233	-4.83023	-4.11046	-4.8775	-3.85997	-4.65528	-3.90288	-4.44162	-4.44411	-4.20167
4930599N23Rik	-3.95035	-4.02159	-4.39914	2.2415	-3.82261	-2.09414	-4.76184	2.52369	-3.91233	-3.2073	2.54775	-2.07014	2.36885	-4.65528	-3.90288	1.23081	-2.12218	-4.20167
4931402G19Rik	-3.95035	-4.02159	3.03549	4.82669	-3.82261	1.68896	-4.76184	-4.21778	-3.91233	-4.83023	0.933933	0.903863	-2.27501	2.26358	1.82504	3.07408	-4.44411	-4.20167
4931403E22Rik	-3.95035	-4.02159	-2.81418	0.100206	-3.82261	-1.57639	-4.76184	1.06763	-3.91233	-3.24527	3.49687	3.5613	-0.690046	-4.65528	-3.90288	-4.44162	-4.44411	-4.20167
4931403G20Rik	-3.95035	-4.02159	-4.39914	-4.14772	-3.82261	-5.27683	-4.76184	-4.21778	-3.91233	-0.74277	-4.11046	-4.8775	-3.85997	-4.65528	3.37325	-4.44162	-4.44411	-4.20167
4931406B18Rik	-3.95035	-4.02159	-4.39914	-4.14772	-3.82261	-5.27683	-4.76184	-4.21778	-3.91233	-4.83023	-4.11046	-0.485179	-3.85997	-4.65528	-3.90288	-4.44162	-4.44411	-4.20167
4931406C07Rik	1.98039	6.31937	6.25281	5.47616	3.23267	5.49053	1.83807	5.83886	3.70973	6.49788	6.75604	5.61135	3.21684	4.8062	-1.09552	5.86558	5.81681	6.54904
4931406H21Rik	-3.95035	6.04315	-4.39914	-1.82579	-1.50069	3.28159	-4.76184	3.35965	0.335602	0.0277483	4.94753	3.79139	2.61576	6.04603	-0.202439	3.45925	-4.44411	-1.39431
4931406P16Rik	0.573214	3.30932	7.20773	-1.34037	4.45816	4.39028	7.75607	4.66181	2.65753	6.06079	4.51525	6.31295	2.85427	6.68624	5.97517	6.41714	6.64799	3.26594
4931408C20Rik	-3.95035	-4.02159	-4.39914	-4.14772	-3.82261	-5.27683	-4.76184	-4.21778	-3.91233	-4.83023	-4.11046	-4.8775	-3.85997	-4.65528	-3.90288	-4.44162	-4.44411	-4.20167
4931408D14Rik	-3.95035	-4.02159	-4.39914	-4.14772	-3.82261	-5.27683	-2.43991	-4.21778	-3.91233	-4.83023	-4.11046	-4.8775	-3.85997	-4.65528	-3.90288	-4.44162	-4.44411	-4.20167
4931409K22Rik	-3.95035	-4.02159	-4.39914	-4.14772	-3.82261	-5.27683	-4.76184	-4.21778	-3.91233	-4.83023	-4.11046	-4.8775	-3.85997	-4.65528	-3.90288	-4.44162	-4.44411	-4.20167
4931412M21	-3.95035	-4.02159	-4.39914	-4.14772	-3.82261	-5.27683	-4.76184	-4.21778	-3.91233	-4.83023	-4.11046	-4.8775	-3.85997	-4.65528	-3.90288	-4.44162	-4.44411	-4.20167
4931414P19Rik	2.92002	-4.02159	-4.39914	-4.14772	0.821242	-1.36994	-4.76184	-0.130313	-3.91233	-3.24527	1.24709	-0.353935	-3.85997	-4.65528	-2.31792	1.93342	-4.44411	-4.20167
4931417E11Rik	-3.95035	-4.02159	-4.39914	-4.14772	-3.82261	-5.27683	-4.76184	-4.21778	-3.91233	-4.83023	-4.11046	-4.8775	-3.85997	-4.65528	-3.90288	-4.44162	-4.44411	-4.20167
4931419H13Rik	-3.95035	-4.02159	-4.39914	-4.14772	-3.82261	-5.27683	-4.76184	-4.21778	-3.91233	-4.83023	-4.11046	-4.8775	-3.85997	-4.65528	-3.90288	-4.44162	-4.44411	-4.20167
4931420L22Rik	-3.95035	-4.02159	-4.39914	-4.14772	-3.82261	-5.27683	-4.76184	-4.21778	-3.91233	-4.83023	-4.11046	-4.8775	-3.85997	-4.65528	-3.90288	-4.44162	-4.44411	-4.20167
4931423N10Rik	-3.95035	-4.02159	-4.39914	-4.14772	-3.82261	-3.69187	-4.76184	3.48958	-3.91233	-4.83023	-4.11046	-4.8775	-3.85997	-4.65528	-3.90288	-4.44162	-4.44411	-4.20167
4931428F04Rik	-3.95035	-4.02159	-4.39914	-4.14772	-3.82261	3.80266	-4.76184	-4.21778	-3.91233	0.295749	-4.11046	-4.8775	-3.85997	-4.65528	-3.90288	-2.85666	-4.44411	-4.20167
4931428L18Rik	-3.95035	-4.02159	-4.39914	-4.14772	-3.82261	-5.27683	-4.76184	-4.21778	-3.91233	-4.83023	-4.11046	-4.8775	-3.85997	-4.65528	-3.90288	-4.44162	-4.44411	-4.20167
4931429I11Rik	-3.95035	-4.02159	-4.39914	-4.14772	-3.82261	-5.27683	-4.76184	-4.21778	-3.91233	-4.83023	-4.11046	-4.8775	-3.85997	-4.65528	-3.90288	-4.44162	-4.44411	-4.20167
4931429L15Rik	-3.95035	-4.02159	-4.39914	-4.14772	-3.82261	-5.27683	-4.76184	-4.21778	-3.91233	-4.83023	-4.11046	-4.8775	-3.85997	-4.65528	-3.90288	-4.44162	-4.44411	-4.20167
4931429P17Rik	-3.95035	-4.02159	-4.39914	-4.14772	-3.82261	-5.27683	-4.76184	-4.21778	-3.91233	-4.83023	-4.11046	-4.8775	-3.85997	-4.65528	-3.90288	-4.44162	-4.44411	-4.20167
4931430N09Rik	-3.95035	-4.02159	-4.39914	-4.14772	-3.82261	-5.27683	-4.76184	-4.21778	-3.91233	-4.83023	-4.11046	-4.8775	-3.85997	-4.65528	-3.90288	-4.44162	-4.44411	-4.20167
4931431B13Rik	-3.95035	-4.02159	-4.39914	-4.14772	-3.82261	-5.27683	-4.76184	-4.21778	-3.91233	-4.83023	-4.11046	-4.8775	-3.85997	-4.65528	-3.90288	-4.44162	-4.44411	-4.20167
4931431C16Rik	-1.14299	-4.02159	-4.39914	1.06173	5.69111	0.277761	-4.76184	-1.89585	-3.91233	-0.306671	-4.11046	-4.8775	-3.85997	2.08619	-3.90288	-4.44162	-1.27418	-4.20167
4931431F19Rik	-3.95035	-4.02159	-4.39914	-4.14772	-3.82261	-5.27683	-4.76184	-4.21778	-3.91233	-4.83023	-4.11046	-4.8775	-3.85997	-4.65528	-3.90288	-4.44162	-4.44411	-4.20167
4931440F15Rik	-3.95035	-4.02159	-4.39914	-4.14772	-3.82261	-1.18597	1.97963	-4.21778	-3.91233	-1.66031	-4.11046	4.26971	-3.85997	-4.65528	-3.90288	-4.44162	-4.44411	-4.20167
4931440J10Rik	-3.95035	-4.02159	-4.39914	-4.14772	-3.82261	-5.27683	-4.76184	-4.21778	-3.91233	-4.83023	-4.11046	-4.8775	-3.85997	-4.65528	-3.90288	-4.44162	-4.44411	-4.20167
4931440L10Rik	-3.95035	-4.02159	-4.39914	-4.14772	-3.82261	-5.27683	-4.76184	-4.21778	-3.91233	-4.83023	-4.11046	-4.8775	-3.85997	-4.65528	-3.90288	-4.44162	-4.44411	-4.20167
4931440P22Rik	-3.95035	-4.02159	-4.39914	-4.14772	-3.82261	-2.46947	-2.43991	-4.21778	-3.91233	-3.24527	-4.11046	-2.07014	-2.27501	-4.65528	-3.90288	-4.44162	-4.44411	-4.20167
4932411E22Rik	-3.95035	-4.02159	-4.39914	-4.14772	-3.82261	-5.27683	-4.76184	-4.21778	-3.91233	-4.83023	-4.11046	-4.8775	-3.85997	-4.65528	-3.90288	-4.44162	-4.44411	-4.20167
4932411N23Rik	-3.95035	-4.02159	-4.39914	-4.14772	-3.82261	-5.27683	-4.76184	-4.21778	-3.91233	-4.83023	-4.11046	-4.8775	-3.85997	-4.65528	-3.90288	-4.44162	-4.44411	-4.20167
4932412D23Rik	-3.95035	-4.02159	-4.39914	-4.14772	-3.82261	-5.27683	-4.76184	-4.21778	-3.91233	-4.83023	-4.11046	-4.8775	-3.85997	-4.65528	-3.90288	-4.44162	-4.44411	-4.20167
4932413F04Rik	-3.95035	-4.02159	-4.39914	-4.14772	-3.82261	-5.27683	-4.76184	-4.21778	-3.91233	-4.83023	-4.11046	-4.8775	-3.85997	-4.65528	-3.90288	-4.44162	-4.44411	-4.20167
4932414J04Rik	-3.95035	-4.02159	-4.39914	-4.14772	-3.82261	-5.27683	-4.76184	-4.21778	-3.91233	-4.83023	-4.11046	-4.8775	-3.85997	-4.65528	-3.90288	-4.44162	-4.44411	-4.20167
4932414N04Rik	-3.95035	-4.02159	-4.39914	-4.14772	-3.82261	-5.27683	-4.76184	-4.21778	-3.91233	-4.83023	-4.11046	-4.8775	-3.85997	-4.65528	-3.90288	-4.44162	-4.44411	-4.20167
4932415M13Rik	-3.95035	-4.02159	-4.39914	-4.14772	-3.82261	-5.27683	-4.76184	-4.21778	-3.91233	-4.83023	-4.11046	-4.8775	-3.85997	-4.65528	-3.90288	-4.44162	-4.44411	-4.20167
4932416H05Rik	-2.36539	-4.02159	-4.39914	3.49151	3.69309	1.43742	-4.76184	-1.41042	2.74589	0.123964	-4.11046	0.331957	-3.85997	-4.65528	-2.31792	-4.44162	-4.44411	-4.20167
4932416K20Rik	-3.95035	-4.02159	-4.39914	-4.14772	-3.82261	-5.27683	-4.76184	-4.21778	-3.91233	-4.83023	-4.11046	-4.8775	-3.85997	-4.65528	-3.90288	-4.44162	-4.44411	-4.20167
4932418E24Rik	-3.95035	-4.02159	-4.39914	-4.14772	-3.82261	-5.27683	-4.76184	-4.21778	-3.91233	-4.83023	-4.11046	-4.8775	-3.85997	-4.65528	-3.90288	-4.44162	-4.44411	-4.20167
4932429P05Rik	-3.95035	-4.02159	-4.39914	-4.14772	-3.82261	-5.27683	-4.76184	-4.21778	-3.91233	-4.83023	-4.11046	-4.8775	-3.85997	-4.65528	-3.90288	-4.44162	-4.44411	-4.20167
4932435O22Rik	-3.95035	-4.02159	-4.39914	-4.14772	-3.82261	-5.27683	-4.76184	-4.21778	-3.91233	-4.83023	-4.11046	-4.8775	-3.85997	-4.65528	-3.90288	-4.44162	-4.44411	-4.20167
4932438A13Rik	8.28537	9.66305	7.59839	6.44754	8.4143	7.29232	8.13921	7.44445	7.81772	7.2281	8.62869	7.70535	7.88948	8.22373	7.23859	8.09584	7.45336	6.11461
4932438H23Rik	-3.95035	-4.02159	-4.39914	-4.14772	-3.82261	-5.27683	-4.76184	-4.21778	-3.91233	-4.83023	1.44413	-4.8775	-3.85997	-4.65528	-3.90288	-4.44162	-4.44411	-4.20167
4932441J04Rik	-3.95035	-4.02159	-4.39914	-4.14772	-3.82261	-5.27683	-4.76184	-4.21778	-3.91233	-4.83023	-4.11046	-4.8775	-3.85997	-4.65528	-3.90288	-4.44162	-4.44411	-4.20167
4932443I19Rik	-3.95035	-4.02159	-4.39914	-4.14772	-3.82261	-5.27683	-4.76184	-4.21778	-3.91233	-4.83023	-4.11046	-4.8775	-3.85997	-4.65528	-3.90288	-4.44162	-4.44411	-4.20167
4932702P03Rik	-3.95035	-4.02159	-4.39914	-4.14772	-2.23765	-5.27683	-4.76184	-4.21778	-3.91233	-4.83023	-4.11046	1.39826	-3.85997	-4.65528	-3.90288	-4.44162	-4.44411	-4.20167
4933400A11Rik	-3.95035	-4.02159	-4.39914	-4.14772	-3.82261	-5.27683	-4.76184	-4.21778	-3.91233	-4.83023	-4.11046	-4.8775	-3.85997	-4.65528	-3.90288	-4.44162	-4.44411	-4.20167
4933400B14Rik	-3.95035	-4.02159	-4.39914	-4.14772	-3.82261	-5.27683	-4.76184	-4.21778	-3.91233	-4.83023	-4.11046	-4.8775	-3.85997	-4.65528	-3.90288	-4.44162	-4.44411	-4.20167
4933400C23Rik	-3.95035	-4.02159	-4.39914	-4.14772	-3.82261	-5.27683	-4.76184	-4.21778	-3.91233	-4.83023	-4.11046	-4.8775	-3.85997	-4.65528	-3.90288	-4.44162	-4.44411	-4.20167
4933400F21Rik	-3.95035	-4.02159	-4.39914	-0.0602586	-2.23765	2.94717	1.34668	4.75089	-2.32736	4.66762	4.12316	0.903863	-0.400539	-3.07032	-3.90288	-0.982187	-2.85915	-4.20167
4933400L20Rik	-3.95035	-4.02159	-4.39914	-4.14772	-3.82261	-5.27683	-4.76184	-4.21778	-3.91233	-4.83023	-4.11046	-4.8775	-3.85997	-4.65528	-3.90288	-4.44162	-4.44411	-4.20167
4933401B06Rik	-3.95035	-4.02159	-4.39914	-4.14772	-3.82261	-5.27683	-4.76184	-4.21778	-3.91233	-4.83023	-4.11046	-4.8775	-3.85997	-4.65528	-3.90288	-4.44162	-4.44411	-4.20167
4933401D09Rik	-3.95035	-4.02159	-4.39914	-4.14772	-3.82261	-5.27683	-4.76184	-4.21778	-3.91233	-4.83023	-4.11046	-4.8775	-3.85997	-4.65528	-3.90288	-4.44162	-4.44411	-4.20167
4933401H06Rik	-3.95035	-4.02159	-4.39914	-4.14772	-3.82261	-5.27683	-4.76184	-4.21778	-3.91233	-0.923342	-4.11046	-4.8775	-3.85997	-4.65528	-3.90288	-4.44162	-4.44411	-4.20167
4933402C06Rik	-3.95035	-4.02159	-4.39914	-4.14772	-3.82261	-5.27683	-4.76184	-4.21778	-3.91233	-4.83023	-4.11046	-4.8775	-3.85997	-4.65528	-3.90288	-4.44162	-4.44411	-4.20167
4933402D24Rik	-3.95035	-4.02159	-4.39914	-4.14772	-3.82261	-5.27683	-4.76184	-4.21778	-3.91233	-4.83023	-4.11046	-0.629569	-3.85997	-4.65528	-3.90288	-4.44162	-4.44411	-4.20167
4933402E13Rik	-3.95035	-4.02159	-4.39914	-4.14772	-3.82261	-5.27683	-4.76184	-4.21778	-3.91233	-4.83023	-4.11046	-4.8775	-3.85997	-4.65528	-3.90288	-4.44162	-4.44411	-4.20167
4933402J07Rik	-3.95035	-4.02159	-4.39914	-4.14772	-3.82261	-5.27683	-4.76184	-4.21778	-3.91233	-4.83023	-4.11046	-4.8775	-3.85997	-4.65528	-3.90288	-4.44162	-4.44411	-4.20167
4933402J10Rik	-3.95035	-4.02159	-4.39914	-4.14772	-3.82261	-5.27683	-4.76184	-4.21778	-3.91233	-4.83023	-4.11046	-4.8775	-3.85997	-4.65528	-3.90288	-4.44162	-4.44411	-4.20167
4933402J15Rik	-3.95035	-4.02159	-4.39914	-4.14772	-3.82261	-5.27683	-4.76184	-4.21778	-3.91233	-4.83023	-4.11046	-4.8775	-3.85997	-4.65528	-3.90288	-4.44162	-4.44411	-4.20167
4933402N03Rik	-3.95035	-4.02159	-4.39914	-4.14772	-3.82261	-5.27683	-4.76184	-4.21778	-3.91233	-4.83023	-4.11046	-4.8775	-3.85997	-4.65528	-3.90288	-4.44162	-4.44411	-4.20167
4933402N22Rik	-3.95035	-4.02159	-4.39914	-4.14772	-3.82261	-5.27683	-4.76184	-4.21778	-3.91233	-4.83023	-4.11046	-4.8775	-3.85997	-4.65528	-3.90288	-4.44162	-4.44411	-4.20167
4933402P03Rik	-3.95035	-4.02159	-4.39914	-4.14772	-3.82261	-5.27683	-4.76184	-4.21778	-3.91233	-4.83023	-4.11046	-4.8775	-3.85997	-4.65528	-3.90288	-4.44162	-4.44411	-4.20167
4933403O08Rik	-3.95035	-4.02159	-4.39914	-4.14772	-3.82261	-5.27683	-4.76184	-4.21778	-3.91233	-4.83023	-4.11046	-4.8775	-3.85997	-4.65528	-3.90288	-4.44162	-4.44411	-4.20167
4933404G15Rik	-3.95035	-4.02159	-4.39914	-4.14772	-3.82261	-5.27683	-4.76184	-4.21778	-3.91233	-4.83023	-4.11046	-4.8775	-3.85997	-4.65528	-3.90288	-4.44162	-4.44411	-4.20167
4933404K08Rik	-3.95035	-4.02159	-4.39914	-4.14772	-3.82261	-5.27683	-4.76184	-4.21778	-3.91233	-4.83023	-4.11046	-4.8775	-3.85997	-4.65528	-3.90288	-4.44162	-4.44411	-4.20167
4933404O12Rik	-3.95035	5.61684	-4.39914	-4.14772	-3.82261	-0.322632	-4.76184	-4.21778	-3.91233	-3.24527	-4.11046	-0.122609	-3.85997	-4.65528	-3.90288	-4.44162	4.6826	-4.20167
4933405D12Rik	-3.95035	-4.02159	-4.39914	-4.14772	-3.82261	-5.27683	-4.76184	-4.21778	-3.91233	-4.83023	-4.11046	-4.8775	-3.85997	-4.65528	-3.90288	-4.44162	-4.44411	-4.20167
4933405E24Rik	-3.95035	-4.02159	-4.39914	-4.14772	-3.82261	-5.27683	-4.76184	-4.21778	-3.91233	-4.83023	-4.11046	-4.8775	-3.85997	-4.65528	-3.90288	-4.44162	-4.44411	-4.20167
4933405L10Rik	-3.95035	-4.02159	-4.39914	-4.14772	-3.82261	-5.27683	-4.76184	-4.21778	-3.91233	-4.83023	-4.11046	-4.8775	-3.85997	-4.65528	-3.90288	-4.44162	-4.44411	-4.20167
4933405O20Rik	-3.95035	-4.02159	-4.39914	-4.14772	-3.82261	-5.27683	-4.76184	-4.21778	-3.91233	-4.83023	-4.11046	-4.8775	-3.85997	-4.65528	-3.90288	-4.44162	-4.44411	-4.20167
4933406C10Rik	3.24932	-4.02159	-4.39914	-4.14772	1.46279	-5.27683	-4.76184	-4.21778	-3.91233	-2.5083	-4.11046	-4.8775	-3.85997	-4.65528	-3.90288	-4.44162	-4.44411	-4.20167
4933406D12Rik	-3.95035	-4.02159	-4.39914	-4.14772	-3.82261	-5.27683	-4.76184	-4.21778	-3.91233	-4.83023	-4.11046	-4.8775	-3.85997	-4.65528	-3.90288	-4.44162	-4.44411	-4.20167
4933406F09Rik	3.03834	-1.69967	-2.81418	-2.56276	2.86389	3.70331	3.36228	-2.63281	4.74945	0.29905	3.35714	2.17779	3.74736	2.00293	1.14151	-4.44162	-4.44411	3.63754
4933406G16Rik	-3.95035	-4.02159	-4.39914	-4.14772	-3.82261	-5.27683	-4.76184	-4.21778	-3.91233	-4.83023	-4.11046	-4.8775	-3.85997	-4.65528	-3.90288	-4.44162	-4.44411	-4.20167
4933406I18Rik	4.29283	5.84104	3.90007	2.53878	3.47201	2.40265	2.41807	3.58312	4.5915	-0.0753452	3.69044	2.26205	2.28978	1.57354	0.852008	0.416362	-2.12218	1.72907
4933406J08Rik	-3.95035	-4.02159	-4.39914	-4.14772	-3.82261	-5.27683	-4.76184	-4.21778	-3.91233	-4.83023	-4.11046	-4.8775	-3.85997	-4.65528	-3.90288	-4.44162	-4.44411	-4.20167
4933406J10Rik	2.4926	-4.02159	2.34233	-2.56276	0.569703	1.43742	-4.76184	-4.21778	-3.91233	0.29905	-0.65103	3.09405	-3.85997	0.554174	2.43697	-4.44162	2.58931	-4.20167
4933406K04Rik	-3.95035	-4.02159	-4.39914	-4.14772	-3.82261	-5.27683	-4.76184	-4.21778	-3.91233	-4.83023	-4.11046	-4.8775	-3.85997	-4.65528	-3.90288	-4.44162	-4.44411	-4.20167
4933406M09Rik	-3.95035	-4.02159	-4.39914	-4.14772	-3.82261	-5.27683	-4.76184	-4.21778	-3.91233	2.84925	-4.11046	-4.8775	-3.85997	-4.65528	-3.90288	-4.44162	-4.44411	-4.20167
4933407E24Rik	-3.95035	-4.02159	-4.39914	-4.14772	-3.82261	-5.27683	-4.76184	-4.21778	-3.91233	-4.83023	-4.11046	-4.8775	-3.85997	-4.65528	-3.90288	-4.44162	-4.44411	-4.20167
4933407G14Rik	-3.95035	-4.02159	-4.39914	-4.14772	-3.82261	-5.27683	-4.76184	-4.21778	-3.91233	-4.83023	-4.11046	-4.8775	-3.85997	-4.65528	-3.90288	-4.44162	-4.44411	-4.20167
4933407I05Rik	-3.95035	-4.02159	-4.39914	-4.14772	-3.82261	-5.27683	-4.76184	-4.21778	-3.91233	-4.83023	-4.11046	-4.8775	-3.85997	-4.65528	-3.90288	-4.44162	-4.44411	-4.20167
4933407K13Rik	-3.95035	4.91799	-4.39914	2.42213	5.54152	5.03492	0.0961402	-2.63281	0.335602	1.35959	-4.11046	4.74272	2.98552	1.36709	5.71367	5.75437	-2.12218	6.3404
4933407L21Rik	-3.95035	-4.02159	-4.39914	-4.14772	-3.82261	-5.27683	-4.76184	-4.21778	-3.91233	-4.83023	-4.11046	-4.8775	-3.85997	-4.65528	-3.90288	-4.44162	-4.44411	-4.20167
4933408B17Rik	-3.95035	-4.02159	0.458841	-4.14772	-3.82261	1.59354	0.282553	-4.21778	-3.91233	-4.83023	-4.11046	-4.8775	-3.85997	-4.65528	-3.90288	-4.44162	-4.44411	-4.20167
4933408J17Rik	-3.95035	-4.02159	-4.39914	-4.14772	-3.82261	-5.27683	-4.76184	-4.21778	-3.91233	-4.83023	-4.11046	-4.8775	-3.85997	-4.65528	-3.90288	-4.44162	-4.44411	-4.20167
4933408N05Rik	-3.95035	-4.02159	-4.39914	-4.14772	-3.82261	-5.27683	-4.76184	-4.21778	-3.91233	-4.83023	-4.11046	-4.8775	-3.85997	-4.65528	-3.90288	-4.44162	-4.44411	-4.20167
4933409G03Rik	-3.95035	-4.02159	-4.39914	-4.14772	-3.82261	-5.27683	-4.76184	-4.21778	-3.91233	-4.83023	-4.11046	-4.8775	-3.85997	-4.65528	-3.90288	-4.44162	-4.44411	-4.20167
4933409K07Rik	-1.62842	-2.43663	-4.39914	-4.14772	4.00393	-2.1069	-0.85495	-1.41042	-3.91233	-1.3708	-4.11046	-0.0619211	-1.05262	-0.95484	-1.58095	-2.11969	-2.85915	-2.61671
4933411E08Rik	-3.95035	-4.02159	-4.39914	-4.14772	-3.82261	-5.27683	-4.76184	-4.21778	-3.91233	-4.83023	-4.11046	-4.8775	-3.85997	-4.65528	-3.90288	-4.44162	-4.44411	-4.20167
4933411G06Rik	-3.95035	-4.02159	-4.39914	-4.14772	-3.82261	-5.27683	-4.76184	-4.21778	-3.91233	-4.83023	-4.11046	-4.8775	-3.85997	-4.65528	-3.90288	-4.44162	-4.44411	-4.20167
4933411G11Rik	-3.95035	-4.02159	-4.39914	-4.14772	-3.82261	-5.27683	-4.76184	-4.21778	-3.91233	-4.83023	-4.11046	-4.8775	-3.85997	-4.65528	-3.90288	-4.44162	-4.44411	-4.20167
4933411K16Rik	-3.95035	-4.02159	6.37152	-4.14772	-3.82261	2.75108	-4.76184	-4.21778	-3.91233	1.98995	-4.11046	-4.8775	-3.85997	-4.65528	-3.90288	-4.44162	-4.44411	-4.20167
4933411K20Rik	4.96553	5.7712	-1.59179	7.83492	5.6141	5.17335	2.13298	5.18949	4.00056	4.37189	5.68882	4.49971	5.07372	6.31985	2.0744	6.98412	6.91838	6.29718
4933412E12Rik	1.83101	-1.69967	-4.39914	-2.56276	-2.23765	2.23887	-4.76184	-4.21778	0.335602	5.15987	-4.11046	2.43539	5.39506	3.56872	-0.443448	-2.85666	3.31744	0.0462599
4933412E24Rik	-3.95035	-4.02159	-4.39914	-4.14772	-3.82261	-5.27683	-4.76184	-4.21778	-3.91233	-4.83023	-4.11046	-4.8775	-3.85997	-4.65528	-3.90288	-4.44162	-4.44411	-4.20167
4933412O06Rik	-3.95035	-4.02159	-4.39914	-4.14772	-3.82261	-5.27683	-4.76184	-4.21778	-3.91233	-4.83023	-4.11046	-4.8775	-3.85997	-4.65528	-3.90288	-4.44162	-4.44411	-4.20167
4933413G19Rik	-3.95035	-4.02159	-4.39914	-4.14772	-3.82261	-5.27683	-4.76184	-4.21778	-3.91233	-4.83023	-4.11046	-4.8775	-3.85997	-4.65528	-3.90288	-4.44162	-4.44411	-4.20167
4933413J09Rik	-3.95035	-4.02159	3.37565	-4.14772	-3.82261	0.395597	-4.76184	-4.21778	-3.91233	4.41532	-4.11046	-0.790034	-3.85997	-4.65528	-3.90288	3.16571	-4.44411	-4.20167
4933413L06Rik	-3.95035	-4.02159	-4.39914	-4.14772	-3.82261	-5.27683	-4.76184	-4.21778	-3.91233	-4.83023	-4.11046	-4.8775	-3.85997	-4.65528	-3.90288	-4.44162	-4.44411	-4.20167
4933415F23Rik	-3.95035	-4.02159	-4.39914	-4.14772	-3.82261	-5.27683	-4.76184	-4.21778	-3.91233	-4.83023	-4.11046	-4.8775	-3.85997	-4.65528	-3.90288	-4.44162	-4.44411	-4.20167
4933416C03Rik	-3.95035	-4.02159	-4.39914	-4.14772	-3.82261	-5.27683	-4.76184	-4.21778	-3.91233	-4.83023	-4.11046	-4.8775	-3.85997	-4.65528	-3.90288	-4.44162	-4.44411	-4.20167
4933416E03Rik	-3.95035	-4.02159	-4.39914	-4.14772	-3.82261	-5.27683	-4.76184	-4.21778	-3.91233	-4.83023	-4.11046	-4.8775	-3.85997	-4.65528	-3.90288	-4.44162	-4.44411	-4.20167
4933416I08Rik	-3.95035	-4.02159	-4.39914	-4.14772	-3.82261	-5.27683	-4.76184	-4.21778	-3.91233	-4.83023	-4.11046	-4.8775	-3.85997	-4.65528	-3.90288	-4.44162	-4.44411	-4.20167
4933416M06Rik	-3.95035	-4.02159	-4.39914	-4.14772	-3.82261	-5.27683	-4.76184	-4.21778	-3.91233	-4.83023	-4.11046	-4.8775	-3.85997	-4.65528	-3.90288	-4.44162	-4.44411	-4.20167
4933416M07Rik	-3.95035	-4.02159	-4.39914	-4.14772	-3.82261	-5.27683	-4.76184	-4.21778	-3.91233	-4.83023	-4.11046	-4.8775	-3.85997	-4.65528	-3.90288	-4.44162	-4.44411	-4.20167
4933417A18Rik	-3.95035	-4.02159	-4.39914	-4.14772	-3.82261	-5.27683	-4.76184	-4.21778	-3.91233	-4.83023	-4.11046	-4.8775	-3.85997	-4.65528	-3.90288	-4.44162	-4.44411	-4.20167
4933417D19Rik	-3.95035	-4.02159	-4.39914	-4.14772	-3.82261	-5.27683	-4.76184	-2.63281	-3.91233	-4.83023	-4.11046	-0.629569	3.97923	-4.65528	0.184584	-4.44162	-1.63675	0.752529
4933417E11Rik	-3.95035	-4.02159	-4.39914	-4.14772	-3.82261	-5.27683	-4.76184	-4.21778	-3.91233	-4.83023	-4.11046	-4.8775	-3.85997	-4.65528	-3.90288	-4.44162	-4.44411	-4.20167
4933417G07Rik	-3.95035	-4.02159	-4.39914	-4.14772	-3.82261	-5.27683	-4.76184	-4.21778	-3.91233	-4.83023	-4.11046	-4.8775	-3.85997	-4.65528	-3.90288	-4.44162	-4.44411	-4.20167
4933417O13Rik	-3.95035	-4.02159	-4.39914	-4.14772	-3.82261	-5.27683	-4.76184	-4.21778	-3.91233	-4.83023	-4.11046	-4.8775	-3.85997	-4.65528	-3.90288	-4.44162	-4.44411	-4.20167
4933421I07Rik	-3.95035	-4.02159	-4.39914	-4.14772	-3.82261	-5.27683	-4.76184	-4.21778	-3.91233	-4.83023	-4.11046	-4.8775	-3.85997	-4.65528	-3.90288	-4.44162	-4.44411	-4.20167
4933421O10Rik	-3.95035	-1.69967	0.458841	5.18095	3.47201	4.2526	4.03582	3.79903	-1.10497	5.47241	4.19788	3.69615	4.85771	4.6734	1.71183	4.91373	4.63003	5.2639
4933422A05Rik	-3.95035	-4.02159	-4.39914	-4.14772	-3.82261	-5.27683	-4.76184	-4.21778	-3.91233	-4.83023	-4.11046	-4.8775	-3.85997	-4.65528	-3.90288	-4.44162	-4.44411	-4.20167
4933422H20Rik	-3.95035	-4.02159	-4.39914	-4.14772	-3.82261	-5.27683	-4.76184	-4.21778	-3.91233	-4.83023	-4.11046	-4.8775	-3.85997	-4.65528	-3.90288	-4.44162	-4.44411	-4.20167
4933424G05Rik	-3.95035	-4.02159	-4.39914	-4.14772	-3.82261	-5.27683	-4.76184	-4.21778	-3.91233	-4.83023	-4.11046	-3.29253	-3.85997	-4.65528	-3.90288	-4.44162	-4.44411	-4.20167
4933424G06Rik	-3.95035	-4.02159	-4.39914	-4.14772	-3.82261	-5.27683	-4.76184	-4.21778	-3.91233	-4.83023	-4.11046	-4.8775	-3.85997	-4.65528	-3.90288	-4.44162	-4.44411	-4.20167
4933425B07Rik	-3.95035	-4.02159	-4.39914	-4.14772	-3.82261	-5.27683	-4.76184	-4.21778	-3.91233	-4.83023	-4.11046	-4.8775	-3.85997	-4.65528	-3.90288	-4.44162	-4.44411	-4.20167
4933425L06Rik	-3.95035	-4.02159	-4.39914	-4.14772	-0.363182	3.86528	-4.76184	-0.758344	-3.91233	-4.83023	1.86682	-3.29253	-3.85997	-4.65528	-3.90288	-2.85666	-4.44411	-4.20167
4933426M11Rik	4.82114	3.55584	4.33218	3.47433	5.86564	5.53615	6.17259	3.78785	-1.5904	5.34094	5.46129	5.70465	6.61475	5.71867	6.11532	6.64651	7.23669	5.88712
4933427D06Rik	-3.95035	-4.02159	-4.39914	-4.14772	-3.82261	-5.27683	-4.76184	-4.21778	-3.91233	-4.83023	-4.11046	-4.8775	-3.85997	-4.65528	-3.90288	-4.44162	-4.44411	-4.20167
4933427D14Rik	-3.95035	0.733294	0.886262	1.68517	0.425313	3.00394	3.65179	3.62143	4.24249	4.53827	-0.410022	3.62633	3.3592	2.54439	-0.732954	0.0819432	1.38878	-0.501228
4933427E11Rik	-3.95035	-4.02159	-4.39914	-4.14772	-3.82261	-5.27683	-4.76184	-4.21778	-3.91233	-4.83023	-4.11046	-4.8775	-3.85997	-4.65528	-3.90288	-4.44162	-4.44411	-4.20167
4933427E13Rik	-3.95035	-4.02159	-4.39914	-4.14772	-3.82261	-5.27683	-4.76184	-4.21778	-3.91233	-4.83023	-4.11046	-4.8775	-3.85997	-4.65528	-3.90288	-4.44162	-4.44411	-4.20167
4933427G17Rik	-3.95035	-4.02159	-4.39914	-4.14772	-3.82261	-5.27683	-4.76184	-4.21778	-3.91233	-4.83023	-4.11046	-4.8775	-3.85997	-4.65528	-3.90288	-4.44162	-4.44411	-4.20167
4933427I22Rik	-3.95035	-4.02159	-4.39914	-4.14772	-3.82261	-5.27683	-4.76184	-4.21778	-3.91233	-4.83023	-4.11046	-4.8775	-3.85997	-4.65528	-3.90288	-4.44162	-4.44411	-4.20167
4933428C19Rik	-3.95035	-4.02159	-4.39914	-4.14772	-3.82261	-5.27683	-4.76184	-4.21778	-3.91233	-4.83023	-4.11046	-4.8775	-3.85997	-4.65528	-3.90288	-4.44162	-4.44411	-4.20167
4933428G20Rik	-3.95035	-4.02159	-4.39914	-4.14772	-3.82261	-3.69187	-4.76184	-4.21778	-3.91233	-4.83023	-4.11046	-4.8775	-3.85997	-4.65528	-3.90288	-4.44162	-4.44411	-4.20167
4933429K18Rik	-3.95035	-4.02159	-4.39914	-4.14772	-3.82261	-5.27683	-4.76184	-4.21778	-3.91233	-4.83023	-4.11046	-4.8775	-3.85997	-4.65528	-3.90288	-4.44162	-4.44411	-4.20167
4933429O19Rik	-3.95035	-4.02159	-4.39914	-4.14772	-3.82261	-5.27683	-4.76184	-4.21778	-3.91233	-4.83023	-4.11046	-4.8775	-3.85997	-4.65528	-3.90288	-4.44162	-4.44411	-4.20167
4933430H16Rik	-3.95035	-4.02159	-4.39914	-4.14772	-3.82261	-5.27683	-4.76184	-4.21778	-3.91233	-4.83023	-4.11046	-4.8775	-3.85997	-4.65528	-3.90288	-4.44162	-4.44411	-4.20167
4933430I17Rik	-3.95035	-4.02159	-4.39914	-4.14772	-3.82261	-5.27683	-4.76184	-4.21778	-3.91233	-4.83023	-4.11046	-4.8775	-3.85997	-4.65528	-3.90288	-4.44162	-4.44411	-4.20167
4933430M04Rik	-3.95035	-4.02159	-4.39914	-4.14772	-3.82261	-5.27683	-4.76184	-4.21778	-3.91233	-4.83023	-4.11046	-4.8775	-3.85997	-4.65528	-3.90288	-4.44162	-4.44411	-4.20167
4933430N04Rik	-3.95035	-4.02159	-4.39914	-4.14772	-3.82261	-5.27683	-4.76184	-4.21778	-3.91233	-4.83023	-4.11046	-4.8775	-3.85997	-4.65528	-3.90288	-4.44162	-4.44411	-4.20167
4933431E20Rik	-3.95035	-4.02159	-4.39914	-4.14772	-3.82261	-5.27683	-4.76184	-4.21778	-3.91233	-3.24527	-4.11046	1.75186	-3.85997	-4.65528	-3.90288	-4.44162	-2.12218	-4.20167
4933431G14Rik	4.03265	-2.43663	-0.698701	5.5087	-1.50069	3.54016	-3.17688	4.59921	-3.91233	5.51073	-4.11046	3.07087	-3.85997	1.78766	2.83859	-4.44162	-4.44411	1.86442
4933432G23Rik	-3.95035	-4.02159	-4.39914	-4.14772	-3.82261	-5.27683	-4.76184	-4.21778	-3.91233	-4.83023	-4.11046	-4.8775	-3.85997	-4.65528	-3.90288	-4.44162	-4.44411	-4.20167
4933432I03Rik	0.137115	-4.02159	3.14775	-4.14772	-3.82261	0.912997	-4.76184	-4.21778	-1.10497	0.842193	3.42092	-4.8775	-3.85997	-4.65528	-3.90288	-4.44162	2.40138	-4.20167
4933432I09Rik	-3.95035	-4.02159	-4.39914	-4.14772	-3.82261	-2.46947	-4.76184	-4.21778	-3.91233	-4.83023	-4.11046	-4.8775	-3.85997	-4.65528	-3.90288	-4.44162	-4.44411	-4.20167
4933432K03Rik	-3.95035	-4.02159	-4.39914	-4.14772	-3.82261	-5.27683	-4.76184	-4.21778	-3.91233	-4.83023	-4.11046	-4.8775	-3.85997	-4.65528	-3.90288	-4.44162	-4.44411	-4.20167
4933433C11Rik	-3.95035	-4.02159	-4.39914	-4.14772	-3.82261	-5.27683	-4.76184	-4.21778	-3.91233	-4.83023	-4.11046	-4.8775	-3.85997	-4.65528	-3.90288	-4.44162	-4.44411	-4.20167
4933433F19Rik	-3.95035	-4.02159	-4.39914	-4.14772	-3.82261	-5.27683	-4.76184	-4.21778	-3.91233	-4.83023	-4.11046	-4.8775	-3.85997	-4.65528	-3.90288	-4.44162	-4.44411	-4.20167
4933433G08Rik	-3.95035	-4.02159	-4.39914	-4.14772	-3.82261	-5.27683	-4.76184	-4.21778	-3.91233	-4.83023	-4.11046	-4.8775	-3.85997	-4.65528	-3.90288	-4.44162	-4.44411	-4.20167
4933433G15Rik	-3.95035	-4.02159	-4.39914	-4.14772	1.13158	-0.632972	-4.76184	-4.21778	-3.91233	-4.83023	-4.11046	-4.8775	-3.85997	-4.65528	-3.90288	-4.44162	-4.44411	-4.20167
4933433G19Rik	-3.95035	-4.02159	-4.39914	-4.14772	-3.82261	-5.27683	-4.76184	-4.21778	-3.91233	-4.83023	-4.11046	-3.29253	-3.85997	-4.65528	-3.90288	-4.44162	-4.44411	-4.20167
4933433H22Rik	-3.95035	-4.02159	-4.39914	-4.14772	-3.82261	-5.27683	-4.76184	-4.21778	-3.91233	-4.83023	-4.11046	-4.8775	-3.85997	-4.65528	-3.90288	-4.44162	-4.44411	-4.20167
4933434E20Rik	5.15556	5.64906	4.78821	5.0544	5.35978	4.67008	4.68317	4.79065	7.8768	4.82976	5.76144	5.49428	6.37485	2.52463	4.12503	6.55061	5.0296	5.78275
4933434I20Rik	-3.95035	-4.02159	-4.39914	-4.14772	-3.82261	-5.27683	-4.76184	-4.21778	-3.91233	-4.83023	-4.11046	-4.8775	-3.85997	-4.65528	-3.90288	-4.44162	-4.44411	-4.20167
4933436E23Rik	-3.95035	-4.02159	-4.39914	-4.14772	-3.82261	-5.27683	-4.76184	-4.21778	-3.91233	-4.83023	-4.11046	-4.8775	-3.85997	-4.65528	-3.90288	-4.44162	-4.44411	-4.20167
4933436H12Rik	-3.95035	-4.02159	-4.39914	-4.14772	-3.82261	-5.27683	-4.76184	-4.21778	-3.91233	-4.83023	-4.11046	-4.8775	-3.85997	-4.65528	-3.90288	-4.44162	-4.44411	-4.20167
4933436I01Rik	-3.95035	-4.02159	-4.39914	-4.14772	-3.82261	-5.27683	-4.76184	-4.21778	-3.91233	-4.83023	-4.11046	-4.8775	-3.85997	-4.65528	-3.90288	-4.44162	-4.44411	-4.20167
4933438B17Rik	-3.95035	-4.02159	-4.39914	-4.14772	-3.82261	-5.27683	-4.76184	-4.21778	-3.91233	-4.83023	-4.11046	-4.8775	-3.85997	-4.65528	-3.90288	-4.44162	-4.44411	-4.20167
4933438K21Rik	-3.95035	-4.02159	-4.39914	-4.14772	-3.82261	-5.27683	-4.76184	-4.21778	-3.91233	-4.83023	-4.11046	-4.8775	-3.85997	-4.65528	-3.90288	-4.44162	-4.44411	-4.20167
4933439C10Rik	1.82259	-1.21424	3.80543	-1.82579	4.72813	3.43115	3.68309	5.76365	-2.32736	3.08266	1.17494	3.1055	5.67725	5.89258	3.76246	1.86216	2.90462	5.53653
4933439K11Rik	-3.95035	-4.02159	-4.39914	-4.14772	-3.82261	-1.57639	-4.76184	-4.21778	-2.32736	-4.83023	-4.11046	-4.8775	-3.85997	-4.65528	-3.90288	-4.44162	-4.44411	-4.20167
4933440J02Rik	-3.95035	-4.02159	-4.39914	-4.14772	-3.82261	-5.27683	-4.76184	-4.21778	-3.91233	-4.83023	-4.11046	-4.8775	-3.85997	-4.65528	-3.90288	-4.44162	-4.44411	-4.20167
4933440M02Rik	-3.95035	-4.02159	-4.39914	-4.14772	-3.82261	-5.27683	-4.76184	-4.21778	-3.91233	-4.83023	-4.11046	-4.8775	-3.85997	-4.65528	-3.90288	-4.44162	-4.44411	-4.20167
5031410I06Rik	-3.95035	-4.02159	-4.39914	-4.14772	-3.82261	0.149437	-4.76184	-4.21778	-3.91233	-4.83023	-4.11046	-4.8775	-3.85997	-4.65528	-3.90288	-4.44162	-0.537218	-4.20167
5031414D18Rik	5.95804	4.3227	4.65343	6.78965	7.14389	5.19586	6.28733	5.79764	1.21696	5.58022	4.38539	5.32585	7.15475	5.86926	6.8891	2.90711	6.66115	5.69769
5031425E22Rik	4.9951	4.01733	4.14389	6.07024	2.55243	3.94958	2.95926	3.81013	4.38688	3.25192	3.20242	4.16416	-3.85997	2.69345	-3.90288	4.84147	0.0794536	4.70823
5031425F14Rik	-3.95035	-4.02159	-4.39914	-4.14772	-3.82261	0.215025	-4.76184	-4.21778	1.57953	-2.5083	-4.11046	-3.29253	-3.85997	-4.65528	-3.90288	-4.44162	-4.44411	-4.20167
5031426D15Rik	-3.95035	-4.02159	-4.39914	-4.14772	-3.82261	-5.27683	-4.76184	-4.21778	-3.91233	-4.83023	-4.11046	0.850424	-3.85997	-4.65528	4.67832	-4.44162	-4.44411	-4.20167
5031434C07Rik	-3.95035	-4.02159	-4.39914	-4.14772	-3.82261	-5.27683	-4.76184	-4.21778	-3.91233	-4.83023	-4.11046	-4.8775	-3.85997	-4.65528	-3.90288	-4.44162	-4.44411	-4.20167
5031434O11Rik	-3.95035	-4.02159	-4.39914	-4.14772	2.19975	0.395597	-4.76184	-1.04785	-3.91233	-4.83023	-4.11046	3.31726	0.0469199	4.59975	-3.90288	-4.44162	-4.44411	0.442189
5031439G07Rik	5.80621	7.83833	6.84582	6.63446	1.38684	6.0022	3.07736	4.27808	1.37308	5.7234	5.68233	5.85806	5.87643	5.07094	3.65936	4.21302	7.29778	4.50914
5033403H07Rik	-3.95035	-4.02159	-4.39914	-4.14772	-3.82261	-5.27683	-4.76184	-4.21778	-3.91233	-4.83023	-4.11046	-4.8775	-3.85997	-4.65528	-3.90288	-4.44162	-4.44411	-4.20167
5033404E19Rik	-3.95035	-4.02159	-4.39914	-4.14772	-3.82261	-5.27683	-4.76184	-4.21778	-3.91233	-4.83023	-4.11046	-4.8775	-3.85997	-4.65528	-3.90288	-4.44162	-4.44411	-4.20167
5033406O09Rik	-3.95035	-4.02159	-4.39914	-4.14772	-3.82261	-5.27683	-4.76184	-4.21778	-3.91233	-4.83023	-4.11046	-4.8775	-3.85997	-4.65528	-3.90288	-4.44162	-4.44411	-4.20167
5133400J02Rik	-3.95035	-4.02159	-4.39914	-4.14772	-3.82261	-5.27683	-4.76184	-4.21778	-3.91233	-4.83023	-4.11046	-4.8775	-3.85997	-4.65528	-3.90288	-4.44162	-4.44411	-4.20167
5330411J11Rik	-3.95035	-4.02159	-4.39914	-4.14772	-3.82261	-5.27683	-4.76184	-4.21778	-3.91233	-4.83023	-4.11046	-4.8775	-3.85997	-4.65528	-3.90288	-4.44162	-4.44411	-4.20167
5330413P13Rik	-3.95035	-4.02159	-4.39914	-4.14772	-3.82261	-5.27683	-4.76184	-4.21778	-3.91233	-4.83023	-4.11046	-4.8775	-3.85997	-4.65528	-3.90288	-4.44162	-4.44411	-4.20167
5330417C22Rik	-3.95035	-4.02159	-4.39914	-4.14772	-3.82261	-5.27683	-4.76184	0.0301518	-3.91233	-4.83023	-4.11046	-4.8775	-3.85997	-4.65528	-3.90288	-4.44162	-4.44411	-4.20167
5330426P16Rik	7.07687	4.17316	-4.39914	3.1284	-3.82261	3.60887	2.3571	-4.21778	1.57953	2.06459	1.72243	3.24662	-3.85997	-0.567817	2.83859	-4.44162	-0.051791	-0.114205
5330434G04Rik	-3.95035	-4.02159	-4.39914	-4.14772	-3.82261	-5.27683	-4.76184	-4.21778	-3.91233	-4.83023	-4.11046	-4.8775	-3.85997	-4.65528	-3.90288	-4.44162	-4.44411	-4.20167
5330439B14Rik	-3.95035	-4.02159	-4.39914	-4.14772	-3.82261	-5.27683	-4.76184	-4.21778	-3.91233	-4.83023	-4.11046	-4.8775	-3.85997	-4.65528	-3.90288	-4.44162	-4.44411	-4.20167
5430401F13Rik	-3.95035	-4.02159	-4.39914	-4.14772	-3.82261	-5.27683	-4.76184	-4.21778	-3.91233	-4.83023	-4.11046	-4.8775	-3.85997	-4.65528	-3.90288	-4.44162	-4.44411	-4.20167
5430402E10Rik	-3.95035	-4.02159	-4.39914	-4.14772	-3.82261	-5.27683	-4.76184	-4.21778	-3.91233	-4.83023	-4.11046	-4.8775	-3.85997	-4.65528	-3.90288	-4.44162	-4.44411	-4.20167
5430402O13Rik	-0.490916	-4.02159	-4.39914	-4.14772	-3.82261	-0.521941	3.45248	4.063	-2.32736	-4.83023	-4.11046	-4.8775	-3.85997	-4.65528	-3.90288	-4.44162	-4.44411	-4.20167
5430403N17Rik	-3.95035	-4.02159	-4.39914	-4.14772	-3.82261	-5.27683	-4.76184	-4.21778	-3.91233	-4.83023	-4.11046	-4.8775	-3.85997	-4.65528	-3.90288	-4.44162	-4.44411	-4.20167
5430405H02Rik	0.907633	5.75155	0.124421	1.51391	-2.23765	1.84398	-4.76184	-4.21778	2.2775	0.766106	5.12076	1.7245	-3.85997	-4.65528	-3.90288	-0.982187	-4.44411	-4.20167
5430416N02Rik	3.68628	-2.43663	-2.07721	3.94504	-3.82261	1.9993	0.96608	1.27408	5.71521	0.214161	-4.11046	-0.970606	-1.53804	3.09291	-3.90288	-4.44162	-4.44411	-4.20167
5430416O09Rik	-3.95035	-4.02159	-4.39914	-4.14772	-3.82261	-3.69187	-4.76184	-4.21778	-3.91233	-4.83023	-4.11046	-4.8775	-3.85997	-4.65528	-3.90288	-4.44162	-4.44411	-4.20167
5430417L22Rik	1.4072	2.69265	4.41784	3.74102	4.54807	4.55764	4.12386	5.06531	-3.91233	5.22098	6.14339	3.28741	4.01655	3.74986	-0.443448	6.87296	6.7574	2.13818
5430419D17Rik	-3.95035	-4.02159	-4.39914	-4.14772	-3.82261	-5.27683	-4.76184	-4.21778	-3.91233	-4.83023	-4.11046	-4.8775	-3.85997	-4.65528	-3.90288	-4.44162	-4.44411	-4.20167
5430421F17Rik	-3.95035	-4.02159	-4.39914	-4.14772	-3.82261	-5.27683	-4.76184	-4.21778	-3.91233	-4.83023	-4.11046	-4.8775	-3.85997	-4.65528	-3.90288	-4.44162	-4.44411	-4.20167
5430421N21Rik	-3.95035	-4.02159	-4.39914	-4.14772	-3.82261	-5.27683	-4.76184	-4.21778	-3.91233	-4.83023	-4.11046	-4.8775	-3.85997	-4.65528	-3.90288	-4.44162	-4.44411	-4.20167
5430425K12Rik	-3.95035	-4.02159	-4.39914	-4.14772	-3.82261	-5.27683	-4.76184	-4.21778	-3.91233	-4.83023	-4.11046	-4.8775	-3.85997	-4.65528	-3.90288	-4.44162	4.37288	-4.20167
5430427M07Rik	-3.95035	-4.02159	-4.39914	-4.14772	-3.82261	-5.27683	-4.76184	-4.21778	-3.91233	-4.83023	-4.11046	-4.8775	-3.85997	-4.65528	-3.90288	-4.44162	-4.44411	-4.20167
5430427O19Rik	6.18279	3.54065	0.355747	4.03715	3.09625	5.64576	7.18616	5.66028	6.3201	5.80549	5.62594	4.48225	-1.05262	6.5499	4.05712	6.01884	6.36887	4.29419
5430428K19Rik	-3.95035	-4.02159	-4.39914	-4.14772	-3.82261	-5.27683	-4.76184	-4.21778	-3.91233	-4.83023	-4.11046	-4.8775	-3.85997	-4.65528	-3.90288	-4.44162	-4.44411	-4.20167
5430434I15Rik	-3.95035	-4.02159	-4.39914	-4.14772	-3.82261	-5.27683	-4.76184	-4.21778	-3.91233	-4.83023	-4.11046	-4.8775	-3.85997	-4.65528	-3.90288	-4.44162	-4.44411	-4.20167
5430435G22Rik	-3.95035	-4.02159	-4.39914	-4.14772	-3.82261	-5.27683	-4.76184	-4.21778	-3.91233	-4.83023	-4.11046	-4.8775	-3.85997	-4.65528	-3.90288	-4.44162	-4.44411	-4.20167
5430437J10Rik	-3.95035	-4.02159	-4.39914	-4.14772	-3.82261	-5.27683	-4.76184	-4.21778	-3.91233	-4.83023	-4.11046	-4.8775	-3.85997	-4.65528	-3.90288	-4.44162	-4.44411	-4.20167
5430440P10Rik	-3.95035	-4.02159	-4.39914	-4.14772	-3.82261	-5.27683	-4.76184	-4.21778	-3.91233	-4.83023	-4.11046	-4.8775	-3.85997	-4.65528	-3.90288	-4.44162	-4.44411	-4.20167
5530400C23Rik	-3.95035	-4.02159	-4.39914	-4.14772	-3.82261	-5.27683	-4.76184	-4.21778	-3.91233	-4.83023	-4.11046	-4.8775	-3.85997	-4.65528	-3.90288	-4.44162	-4.44411	-4.20167
5530401A14Rik	-3.95035	-4.02159	-4.39914	-4.14772	-3.82261	-5.27683	-4.76184	-4.21778	-3.91233	-4.83023	-4.11046	-4.8775	-3.85997	-4.65528	-3.90288	-4.44162	-4.44411	-4.20167
5530601H04Rik	5.91229	-2.43663	5.1877	4.0859	0.821242	4.71611	-0.369523	4.92943	4.59943	4.36698	4.36932	4.34409	-2.27501	-0.407352	5.74997	1.7872	7.47438	5.53811
5730403I07Rik	-3.95035	-4.02159	-4.39914	-4.14772	-3.82261	-5.27683	-4.76184	-4.21778	-3.91233	-4.83023	-4.11046	-4.8775	-3.85997	-4.65528	-3.90288	-4.44162	-4.44411	-4.20167
5730405O15Rik	4.05528	-4.02159	3.1631	-1.82579	-3.82261	-5.27683	-1.30241	-4.21778	-1.5904	-4.83023	1.38139	0.548768	4.9506	1.82045	-3.90288	-4.44162	-4.44411	4.27001
5730408K05Rik	6.73878	5.22396	-4.39914	-2.56276	-2.23765	-1.57639	4.05514	-4.21778	3.86246	1.05241	-4.11046	-0.353935	-1.53804	-4.65528	-3.90288	4.32325	-4.44411	1.2246
5730409E04Rik	2.86983	5.18542	5.24652	5.97511	-3.82261	2.73998	2.27158	5.03252	2.31649	0.66162	5.02653	2.32218	2.58297	5.23194	5.70999	1.11297	0.0794536	6.07794
5730412P04Rik	-3.95035	-4.02159	-4.39914	-4.14772	-3.82261	-5.27683	-4.76184	-4.21778	-3.91233	-4.83023	-4.11046	-4.8775	-3.85997	-4.65528	-3.90288	-4.44162	-4.44411	-4.20167
5730416F02Rik	-3.95035	-4.02159	-4.39914	-4.14772	-3.82261	-5.27683	-4.76184	-4.21778	-3.91233	-4.83023	-4.11046	-4.8775	-3.85997	-4.65528	-3.90288	-4.44162	-4.44411	-4.20167
5730420D15Rik	-3.95035	-4.02159	-4.39914	-4.14772	-3.82261	-5.27683	-4.76184	-4.21778	-3.91233	-4.83023	-4.11046	-4.8775	-3.85997	-4.65528	-3.90288	-4.44162	-4.44411	-4.20167
5730422E09Rik	-3.95035	-4.02159	-4.39914	-4.14772	-3.82261	-1.0289	-1.0614	-4.21778	-3.91233	-4.83023	-2.5255	-4.8775	-3.85997	-4.65528	-2.31792	-0.741179	-4.44411	-4.20167
5730435O14Rik	-2.36539	-4.02159	2.31511	-4.14772	-1.01526	-0.418847	-4.76184	-4.21778	-3.91233	3.14131	-1.78853	2.11119	-3.85997	-4.65528	-3.90288	-4.44162	0.765345	-2.61671
5730455P16Rik	-3.95035	7.8969	3.73529	-4.14772	6.02131	5.39648	3.60885	0.42608	3.24755	6.0547	5.1956	3.89399	3.39742	5.41752	5.33314	5.59593	2.90462	5.23504
5730457N03Rik	-3.95035	-4.02159	-4.39914	-4.14772	-3.82261	-5.27683	-4.76184	-4.21778	-3.91233	-4.83023	-4.11046	-4.8775	-3.85997	-4.65528	-3.90288	-4.44162	-4.44411	-4.20167
5730460C07Rik	-3.95035	-4.02159	-4.39914	-4.14772	-3.82261	-5.27683	-4.76184	-4.21778	-3.91233	-4.83023	-4.11046	-4.8775	-3.85997	-4.65528	-3.90288	-4.44162	-4.44411	-4.20167
5730480H06Rik	-3.95035	-4.02159	-4.39914	1.40687	-3.82261	2.23887	-4.76184	-4.21778	-3.91233	0.379221	-4.11046	-1.41806	-3.85997	2.69345	3.42804	5.27091	0.510088	-4.20167
5730488B01Rik	-3.95035	-4.02159	-4.39914	-4.14772	-3.82261	-5.27683	-4.76184	-4.21778	-3.91233	-4.83023	-4.11046	-4.8775	-3.85997	-4.65528	-3.90288	-4.44162	-4.44411	-4.20167
5730507C01Rik	-3.95035	-4.02159	-0.698701	-4.14772	-3.82261	-2.46947	-4.76184	-4.21778	-3.91233	-3.24527	-1.78853	-4.8775	-3.85997	-2.33335	-3.90288	-4.44162	-4.44411	-4.20167
5730508B09Rik	3.62708	-4.02159	-2.81418	-4.14772	-3.82261	0.951991	-4.76184	2.52369	-3.91233	-3.24527	2.5189	-4.8775	-3.85997	-0.748389	-3.90288	-4.44162	-4.44411	-4.20167
5730522E02Rik	-3.95035	-4.02159	-4.39914	-4.14772	-3.82261	-5.27683	-4.76184	-4.21778	-3.91233	-4.83023	-4.11046	-4.8775	-3.85997	-4.65528	-3.90288	-4.44162	-4.44411	-4.20167
5730559C18Rik	-3.95035	-4.02159	-4.39914	-4.14772	-3.82261	-5.27683	-4.76184	-4.21778	-3.91233	-4.83023	-4.11046	-4.8775	-3.85997	-4.65528	-3.90288	-4.44162	-4.44411	-4.20167
5830403L16Rik	-3.95035	-4.02159	-4.39914	-4.14772	-3.82261	-5.27683	-4.76184	-4.21778	-3.91233	-4.83023	-4.11046	-4.8775	-3.85997	-4.65528	-3.90288	-4.44162	-4.44411	-4.20167
5830411N06Rik	-3.95035	-4.02159	-4.39914	-4.14772	-3.82261	-5.27683	-4.76184	-4.21778	-3.91233	-4.83023	-4.11046	-4.8775	-3.85997	-4.65528	-3.90288	-4.44162	-4.44411	-4.20167
5830415F09Rik	-3.95035	-4.02159	2.51972	2.19213	-3.82261	1.19891	-4.76184	-4.21778	-1.5904	2.22505	-0.410022	-1.41806	-3.85997	-4.65528	-2.31792	-4.44162	-2.85915	-4.20167
5830416I19Rik	-3.95035	-4.02159	-4.39914	-4.14772	-3.82261	-5.27683	-4.76184	-4.21778	-3.91233	-4.83023	-4.11046	-2.55557	0.227492	-4.65528	-3.90288	-4.44162	-4.44411	-4.20167
5830416P10Rik	-3.95035	-4.02159	-4.39914	-4.14772	-3.82261	1.59354	-4.76184	-4.21778	-3.91233	-4.83023	-4.11046	-4.8775	-3.85997	-4.65528	-3.90288	-4.44162	-4.44411	-4.20167
5830417I10Rik	5.46784	5.21839	7.26479	7.65213	7.59481	6.712	6.7973	7.82082	7.94759	5.96496	5.67636	6.62824	5.08454	3.48386	5.27404	3.37216	6.6773	6.98692
5830418K08Rik	6.81866	6.63929	7.03497	8.17505	4.85334	7.21427	6.44212	5.8763	7.08979	5.97632	6.11233	5.39746	6.09568	6.94231	5.00701	7.04672	6.81033	8.93164
5830418P13Rik	-3.95035	-4.02159	-4.39914	-4.14772	-3.82261	-5.27683	-4.76184	-4.21778	-3.91233	-4.83023	-4.11046	-4.8775	-3.85997	-4.65528	-3.90288	-4.44162	-4.44411	-4.20167
5830428M24Rik	-3.95035	-4.02159	-4.39914	-4.14772	-3.82261	-5.27683	-4.76184	-4.21778	-3.91233	-4.83023	-4.11046	-4.8775	-3.85997	-4.65528	-3.90288	-4.44162	-4.44411	-4.20167
5830432E09Rik	2.31644	-4.02159	1.82968	-2.56276	-0.122174	1.64204	-3.17688	-2.63281	-3.91233	1.57916	6.87751	1.89069	4.72874	-0.262962	-3.90288	-2.85666	-4.44411	-1.03174
5830444B04Rik	-2.3558	1.18786	4.63213	-4.14772	6.64081	3.79077	1.50157	4.88346	-3.91233	2.01877	4.06187	4.10493	6.17208	-2.32759	0.665153	0.00728221	-2.85915	-1.31414
5830454E08Rik	-2.36539	-4.02159	-4.39914	1.34413	-1.50069	4.20497	-0.513913	-4.21778	-3.91233	0.66162	2.87822	-4.8775	-3.85997	-1.84792	-3.90288	-4.44162	-4.44411	-4.20167
5830473C10Rik	-3.95035	-4.02159	-4.39914	-4.14772	-3.82261	-5.27683	-4.76184	-4.21778	-3.91233	-2.5083	-4.11046	-4.8775	-3.85997	-4.65528	-3.90288	-4.44162	-4.44411	-4.20167
5930412G12Rik	-3.95035	-4.02159	-4.39914	-4.14772	-3.82261	-5.27683	-4.76184	-4.21778	-3.91233	-4.83023	-4.11046	-4.8775	-3.85997	-4.65528	-3.90288	-4.44162	-4.44411	-4.20167
5930430L01Rik	-3.95035	-4.02159	-4.39914	-4.14772	-3.82261	-2.1069	-4.76184	2.35208	-3.91233	-2.5083	-4.11046	0.850424	-3.85997	-2.33335	2.75533	-4.44162	-4.44411	-4.20167
5930438M14Rik	-3.95035	-4.02159	-4.39914	-4.14772	-3.82261	-5.27683	-4.76184	-4.21778	-3.91233	-4.83023	-4.11046	-4.8775	-3.85997	-4.65528	-3.90288	-4.44162	-4.44411	-4.20167
6030407O03Rik	-3.95035	-4.02159	-4.39914	-4.14772	-3.82261	-5.27683	-4.76184	-4.21778	-3.91233	-4.83023	-4.11046	-4.8775	-3.85997	-4.65528	-3.90288	-4.44162	-4.44411	-4.20167
6030408B16Rik	-3.95035	-4.02159	-4.39914	-4.14772	-3.82261	-5.27683	-4.76184	-4.21778	-3.91233	-4.83023	-4.11046	-4.8775	-3.85997	-4.65528	-3.90288	-4.44162	-4.44411	-4.20167
6030419C18Rik	-3.95035	-4.02159	-4.39914	-4.14772	-3.82261	-5.27683	-4.76184	-4.21778	-3.91233	-4.83023	-4.11046	-4.8775	-3.85997	-4.65528	-3.90288	-4.44162	-4.44411	-4.20167
6030440G07Rik	-3.95035	-4.02159	-4.39914	-4.14772	-3.82261	-5.27683	-4.76184	-4.21778	-3.91233	-4.83023	-4.11046	-4.8775	-3.85997	-4.65528	-3.90288	-4.44162	-4.44411	-4.20167
6030443J06Rik	-3.95035	-4.02159	-4.39914	2.0811	-3.82261	-5.27683	-4.76184	-4.21778	-3.91233	-0.74277	-4.11046	-4.8775	-3.85997	-4.65528	-3.90288	-4.44162	-4.44411	-4.20167
6030458C11Rik	4.66068	6.93478	4.41784	3.80065	4.78841	4.67882	4.48846	-0.758344	2.80192	3.90786	1.38139	6.28427	4.53663	4.14885	2.72648	6.27691	0.310779	1.98816
6030466F02Rik	-3.95035	-4.02159	-4.39914	-4.14772	-3.82261	-5.27683	-4.76184	-4.21778	-3.91233	-4.83023	-4.11046	-4.8775	-3.85997	-4.65528	-3.90288	-4.44162	-4.44411	-4.20167
6030468B19Rik	-3.95035	-2.43663	2.87698	2.29522	-3.82261	2.77302	2.62186	4.68611	-2.32736	3.18658	-2.5255	2.24144	-3.85997	0.298917	-3.90288	-4.44162	-4.44411	-4.20167
6030469F06Rik	-3.95035	-4.02159	-4.39914	-4.14772	-3.82261	-5.27683	-4.76184	-4.21778	-3.91233	-4.83023	-4.11046	-4.8775	-3.85997	-4.65528	-3.90288	-4.44162	-4.44411	-4.20167
6030498E09Rik	-3.95035	-4.02159	-4.39914	-4.14772	-3.82261	-5.27683	-4.76184	-4.21778	-3.91233	-4.83023	-4.11046	-4.8775	-3.85997	-4.65528	-3.90288	-4.44162	-4.44411	-4.20167
6230400D17Rik	-3.95035	-4.02159	-0.698701	4.65641	-3.82261	-0.418847	-4.76184	4.3097	-3.91233	-4.83023	-1.78853	-0.0195155	6.03029	-4.65528	-3.90288	-4.44162	-4.44411	-4.20167
6330403A02Rik	-3.95035	-4.02159	-4.39914	-4.14772	-3.82261	-5.27683	-4.76184	-4.21778	-3.91233	-4.83023	-4.11046	-4.8775	-3.85997	-4.65528	-1.58095	-4.44162	1.74572	-4.20167
6330403K07Rik	-3.95035	-4.02159	-4.39914	-4.14772	-3.82261	2.61192	-4.76184	-4.21778	-3.91233	-4.83023	-4.11046	1.75186	-3.85997	-2.33335	-3.90288	-4.44162	-4.44411	-4.20167
6330407A03Rik	4.95353	9.63539	5.45729	5.00963	3.76984	5.47889	5.5769	2.55041	5.58951	5.32838	6.35816	5.18185	7.2648	4.29016	6.21995	5.37056	1.96528	5.9366
6330408A02Rik	-1.14299	-4.02159	-4.39914	-4.14772	-2.23765	2.58736	-3.17688	-4.21778	-3.91233	-4.83023	-4.11046	0.614357	-3.85997	-4.65528	-3.90288	-4.44162	1.70564	-4.20167
6330409D20Rik	-3.95035	1.8113	-0.311678	-4.14772	-3.82261	0.504532	-4.76184	-4.21778	-3.91233	-4.83023	-0.410022	-4.8775	3.63988	-3.07032	2.50651	-4.44162	-1.63675	-2.61671
6330410L21Rik	-3.95035	-4.02159	-4.39914	-4.14772	-3.82261	-5.27683	-4.76184	-4.21778	-3.91233	-4.83023	-4.11046	-4.8775	-3.85997	-4.65528	-3.90288	-4.44162	-4.44411	-4.20167
6330415B21Rik	-3.95035	-4.02159	-4.39914	-4.14772	-3.82261	-5.27683	-4.76184	-4.21778	-3.91233	-4.83023	-4.11046	-4.8775	-3.85997	-4.65528	-3.90288	-4.44162	-4.44411	-4.20167
6330416G13Rik	1.25911	6.42859	4.65343	5.69934	6.2741	5.97169	6.18726	5.32332	4.57551	5.3534	4.82912	5.53083	6.24725	4.83457	6.67549	5.83101	4.89797	6.61931
6330418K02Rik	-3.95035	0.6497	2.37617	6.4449	4.5654	4.06351	2.17126	4.61252	0.649611	-4.83023	3.34717	3.93673	1.59486	5.83862	5.815	1.32551	2.98149	2.36302
6330419J24Rik	-2.36539	-4.02159	-4.39914	0.496135	0.932273	1.46464	-4.76184	-0.130313	-0.0054351	-4.83023	5.05696	1.96799	-2.27501	-1.48535	-3.90288	-4.44162	-2.85915	6.25469
6330549D23Rik	-0.249908	-2.43663	-1.22922	-4.14772	-3.82261	-1.57639	1.01952	-4.21778	-3.91233	0.29905	-4.11046	-1.70757	-3.85997	-2.33335	-3.90288	-2.11969	-2.12218	-4.20167
6430411K18Rik	-3.95035	-4.02159	-4.39914	-4.14772	-3.82261	-5.27683	-4.76184	-4.21778	-3.91233	-4.83023	-4.11046	0.480055	-3.85997	-4.65528	-3.90288	-4.44162	-4.44411	-4.20167
6430503K07Rik	-3.95035	-4.02159	-4.39914	-4.14772	-3.82261	-5.27683	-4.76184	-4.21778	-3.91233	-4.83023	-4.11046	-4.8775	-3.85997	-4.65528	-3.90288	-4.44162	-4.44411	-4.20167
6430531B16Rik	-3.95035	-4.02159	-4.39914	-4.14772	-3.82261	-5.27683	-4.76184	-4.21778	-3.91233	-4.83023	-4.11046	-4.8775	-3.85997	-4.65528	-3.90288	-4.44162	-4.44411	-4.20167
6430548M08Rik	-3.95035	-4.02159	-0.939709	3.39917	3.79944	3.35617	5.47776	-2.63281	4.79158	4.68744	0.933933	3.02337	-3.85997	2.35595	-3.90288	-4.44162	-2.85915	3.80396
6430550D23Rik	-3.95035	-4.02159	-4.39914	-4.14772	-3.82261	-5.27683	-4.76184	-4.21778	-3.91233	-4.83023	-4.11046	0.737213	-3.85997	-1.48535	0.489438	-4.44162	-4.44411	-4.20167
6430562O15Rik	-3.95035	-4.02159	-4.39914	-4.14772	-3.82261	-5.27683	-4.76184	-4.21778	-3.91233	-4.83023	-2.5255	-4.8775	-3.85997	-4.65528	-3.90288	-4.44162	-4.44411	-4.20167
6430571L13Rik	-3.95035	-4.02159	-4.39914	-4.14772	-3.82261	-5.27683	-4.76184	-4.21778	-3.91233	1.19214	-4.11046	-4.8775	-3.85997	-4.65528	-3.90288	-4.44162	-4.44411	-4.20167
6430573F11Rik	-3.95035	-4.02159	-4.39914	-4.14772	-3.82261	-5.27683	-4.76184	-4.21778	-3.91233	-4.83023	-4.11046	-4.8775	-3.85997	-4.65528	-3.90288	-4.44162	-4.44411	-4.20167
6430584L05Rik	-3.95035	-4.02159	-4.39914	-4.14772	-3.82261	-5.27683	-4.76184	-4.21778	-3.91233	-4.83023	-4.11046	-4.8775	-3.85997	-4.65528	-3.90288	-4.44162	-4.44411	-4.20167
6430706D22Rik	6.64521	-4.02159	7.53951	7.11186	-0.840761	5.38732	5.61424	5.52052	5.85367	3.84699	5.10143	6.07274	4.03715	4.88093	4.4854	4.40969	3.9601	6.177
6430710C18Rik	-3.95035	-4.02159	-4.39914	-4.14772	-3.82261	-5.27683	-4.76184	-4.21778	-3.91233	-4.83023	-4.11046	-4.8775	-3.85997	-4.65528	-3.90288	-4.44162	-4.44411	-4.20167
6530402F18Rik	-3.95035	3.94995	5.14196	-4.14772	-1.50069	0.556062	3.92115	-4.21778	-3.91233	-2.02288	-4.11046	-4.8775	-3.85997	6.94603	-3.90288	-1.27169	-4.44411	-2.61671
6530411M01Rik	-3.95035	-4.02159	-4.39914	-4.14772	-3.82261	-5.27683	-4.76184	-4.21778	-3.91233	-4.83023	-4.11046	-4.8775	-3.85997	-4.65528	-3.90288	-4.44162	-4.44411	-4.20167
6720416L17Rik	-3.95035	-4.02159	-4.39914	-4.14772	-3.82261	-5.27683	-4.76184	-4.21778	-3.91233	-4.83023	-4.11046	-4.8775	-3.85997	-4.65528	-3.90288	-4.44162	-4.44411	-4.20167
6720468P15Rik	-3.95035	-4.02159	-4.39914	-4.14772	-3.82261	-5.27683	-4.76184	-4.21778	-3.91233	-4.83023	-4.11046	-4.8775	-3.85997	-4.65528	-3.90288	-4.44162	-4.44411	-4.20167
6720483E21Rik	-3.95035	-4.02159	-4.39914	-4.14772	-3.82261	-5.27683	-4.76184	-4.21778	-3.91233	-4.83023	-4.11046	-4.8775	-3.85997	-4.65528	-3.90288	-4.44162	-4.44411	-4.20167
6720489N17Rik	-2.36539	-4.02159	0.124421	-4.14772	-1.50069	-0.418847	-4.76184	-4.21778	2.65753	-4.83023	-4.11046	-4.8775	-3.85997	-0.748389	-3.90288	-0.741179	-4.44411	-4.20167
6820408C15Rik	-1.62842	-4.02159	-2.81418	-4.14772	5.60575	-5.27683	-4.76184	-4.21778	-3.91233	-4.83023	-4.11046	-1.70757	-3.85997	-4.65528	-3.90288	-4.44162	-4.44411	-4.20167
6820431F20Rik	9.75405	9.41845	8.38688	9.62257	8.46833	8.74076	8.05706	8.36765	9.09	8.83428	8.87882	8.80881	8.90065	8.84957	9.09238	8.11068	9.91385	9.3238
7420426K07Rik	-3.95035	-4.02159	-4.39914	-4.14772	-3.82261	-5.27683	-4.76184	-4.21778	-3.91233	-4.83023	-4.11046	-4.8775	-3.85997	-4.65528	-3.90288	-4.44162	-4.44411	-4.20167
7420461P10Rik	-3.95035	-4.02159	-4.39914	-4.14772	-3.82261	-5.27683	-4.76184	-4.21778	-3.91233	-4.83023	-4.11046	-4.8775	-3.85997	-4.65528	-3.90288	-4.44162	-4.44411	-4.20167
7420700N18Rik	-3.95035	-4.02159	-4.39914	-4.14772	-3.82261	-5.27683	-4.76184	-4.21778	-3.91233	-4.83023	-4.11046	-4.8775	-3.85997	-4.65528	-3.90288	-4.44162	-4.44411	-4.20167
7420701I03Rik	-3.95035	-4.02159	-4.39914	-4.14772	-3.82261	-5.27683	-4.76184	-4.21778	-3.91233	-4.83023	-4.11046	-4.8775	-3.85997	-4.65528	-3.90288	-4.44162	-4.44411	-4.20167
7530416G11Rik	-3.95035	-4.02159	-4.39914	-4.14772	-3.82261	-5.27683	-4.76184	-4.21778	-3.91233	-4.83023	-4.11046	-4.8775	-3.85997	-4.65528	-3.90288	-4.44162	-4.44411	-4.20167
7630403G23Rik	-3.95035	-4.02159	-4.39914	-4.14772	-3.82261	-5.27683	-4.76184	-4.21778	-3.91233	-4.83023	-4.11046	-3.29253	-3.85997	-4.65528	-3.90288	-4.44162	-4.44411	-4.20167
8030411F24Rik	-3.95035	-4.02159	-4.39914	-4.14772	-3.82261	-5.27683	-4.76184	-4.21778	-3.91233	-4.83023	-4.11046	-4.8775	-3.85997	-4.65528	-3.90288	-4.44162	-4.44411	-4.20167
8030423F21Rik	-2.36539	-4.02159	-4.39914	-4.14772	-3.82261	-5.27683	-2.43991	-2.63281	-3.91233	-4.83023	-4.11046	-4.8775	-3.85997	0.836573	4.30169	-2.85666	-4.44411	-4.20167
8030423J24Rik	-3.95035	-4.02159	3.59521	-4.14772	-3.82261	-5.27683	-4.76184	-4.21778	-3.91233	-4.83023	-4.11046	-2.07014	-3.85997	3.10627	-3.90288	4.7556	-0.356646	-4.20167
8030442B05Rik	3.65698	6.40362	5.33726	0.375841	4.71266	3.82908	4.6369	3.59601	4.29225	4.2913	3.08921	3.76275	5.06187	5.20426	6.02342	7.5238	-0.537218	4.95062
8030443G20Rik	-3.95035	-4.02159	-4.39914	-4.14772	-3.82261	-5.27683	-4.76184	-4.21778	-3.91233	-4.83023	-4.11046	-4.8775	-3.85997	-4.65528	-3.90288	-4.44162	-4.44411	-4.20167
8030462N17Rik	2.99217	2.00077	6.55869	4.10494	6.09476	4.91423	5.08208	1.93197	3.95186	4.91292	6.42773	3.16142	3.3592	2.76257	4.70815	1.44102	1.70564	5.44399
8430408G22Rik	-3.95035	-4.02159	-0.311678	0.100206	-3.82261	4.00626	-1.95449	4.66181	-3.91233	2.38894	6.21484	-0.790034	-3.85997	2.99577	4.06866	-2.85666	0.913444	3.89109
8430419L09Rik	5.62519	-0.562162	5.98995	4.0071	5.80856	5.14418	7.27055	5.18097	-1.5904	3.00897	-4.11046	3.54457	3.76208	6.83707	7.53643	5.29816	-0.984677	3.54653
8430422H06Rik	-3.95035	-4.02159	-4.39914	-4.14772	-3.82261	-5.27683	-4.76184	-4.21778	-3.91233	-4.83023	-4.11046	-4.8775	-3.85997	-4.65528	-3.90288	-4.44162	-4.44411	-4.20167
8430423G03Rik	-3.95035	-4.02159	-4.39914	-4.14772	-3.82261	-5.27683	-4.76184	-4.21778	-3.91233	-4.83023	-4.11046	-4.8775	-3.85997	-4.65528	-3.90288	-4.44162	-4.44411	-4.20167
8430426J06Rik	-3.95035	-4.02159	-4.39914	-4.14772	-3.82261	-5.27683	-4.76184	-4.21778	-3.91233	-4.83023	-4.11046	-4.8775	-3.85997	-4.65528	-3.90288	-4.44162	-4.44411	-4.20167
8430427H17Rik	8.03015	6.65701	6.97861	6.57764	6.42175	6.57843	5.37387	8.33129	5.70422	4.24391	-0.940537	4.94109	7.91605	6.07519	7.38656	-0.741179	2.81328	7.60448
8430429K09Rik	-3.95035	-4.02159	-4.39914	3.88018	-3.82261	0.912997	1.1689	3.62143	-3.91233	-4.83023	0.4131	4.92179	-3.85997	-4.65528	-0.443448	-4.44162	0.841294	-4.20167
8430431K14Rik	-3.95035	-4.02159	-4.39914	-4.14772	-3.82261	-5.27683	-4.76184	-4.21778	-3.91233	-4.83023	-4.11046	-2.55557	-3.85997	-4.65528	-3.90288	-4.44162	-4.44411	-4.20167
8430436N08Rik	-3.95035	-4.02159	-4.39914	-4.14772	-3.82261	-5.27683	-4.76184	-4.21778	-3.91233	-4.83023	-4.11046	-4.8775	-3.85997	-4.65528	-3.90288	-4.44162	-4.44411	-4.20167
8430437L04Rik	-3.95035	-4.02159	-4.39914	-4.14772	-3.82261	-5.27683	-4.76184	-4.21778	-3.91233	-4.83023	-4.11046	-4.8775	-3.85997	-4.65528	-3.90288	-4.44162	-4.44411	-4.20167
9030025P20Rik	3.75839	-0.422276	-4.39914	5.20132	3.79724	4.05099	1.37689	5.68526	4.80515	5.10832	2.62425	3.54642	1.3003	5.81385	-1.50234	4.56631	3.35226	-4.20167
9030204H09Rik	-3.95035	-4.02159	-4.39914	-4.14772	-3.82261	-5.27683	-4.76184	-4.21778	-3.91233	-4.83023	-4.11046	-4.8775	-3.85997	-4.65528	-3.90288	-4.44162	-4.44411	-4.20167
9030404E10Rik	-3.95035	-4.02159	-4.39914	-4.14772	-3.82261	-5.27683	-4.76184	-4.21778	-3.91233	-4.83023	-4.11046	-4.8775	-3.85997	-4.65528	-3.90288	-4.44162	-4.44411	-4.20167
9030612E09Rik	-3.95035	-4.02159	-4.39914	-4.14772	-3.82261	-5.27683	-4.76184	-4.21778	-3.91233	-4.83023	-4.11046	-4.8775	-3.85997	-4.65528	-3.90288	-4.44162	-4.44411	-4.20167
9030617O03Rik	6.85459	3.92677	4.9996	4.0859	6.86476	5.22202	-1.95449	5.60718	8.021	5.13411	3.54059	4.33925	4.13438	4.03472	5.06002	7.77422	5.84936	5.63596
9030619P08Rik	-3.95035	-4.02159	-4.39914	-4.14772	-3.82261	-5.27683	-4.76184	-4.21778	-3.91233	-4.83023	-4.11046	-4.8775	-3.85997	-4.65528	-3.90288	-4.44162	-4.44411	-4.20167
9030624G23Rik	-3.95035	-4.02159	-4.39914	-1.82579	-3.82261	-2.46947	-1.95449	-4.21778	-3.91233	-2.5083	-4.11046	-4.8775	-3.85997	-2.33335	-2.31792	-4.44162	-4.44411	-4.20167
9030624J02Rik	7.30645	6.37394	5.9035	5.12141	6.26352	4.89685	5.2702	7.64215	7.80664	5.85714	3.38938	4.95697	6.12445	5.78455	3.98586	5.77391	5.12004	5.316
9030625G05Rik	-3.95035	-4.02159	-4.39914	-4.14772	-3.82261	-5.27683	-4.76184	-4.21778	-3.91233	-4.83023	-4.11046	-4.8775	-3.85997	-4.65528	-3.90288	-4.44162	-4.44411	-4.20167
9130008F23Rik	-3.95035	-4.02159	-4.39914	-4.14772	-3.82261	-5.27683	-4.76184	-4.21778	-3.91233	-4.83023	-4.11046	-4.8775	-3.85997	-4.65528	-3.90288	-4.44162	-4.44411	-4.20167
9130011E15Rik	4.56929	-2.43663	4.33895	6.03839	7.19906	3.1867	5.13752	5.97821	3.0989	0.784477	3.40524	3.22579	8.24364	-3.07032	-1.58095	4.44408	2.40138	2.89636
9130015A21Rik	-3.95035	-4.02159	-4.39914	-4.14772	-3.82261	-5.27683	-4.76184	-4.21778	-3.91233	-4.83023	-4.11046	-4.8775	-3.85997	-4.65528	-3.90288	-4.44162	-4.44411	-4.20167
9130015L21Rik	-3.95035	-4.02159	-4.39914	-4.14772	-3.82261	-5.27683	-4.76184	-4.21778	-3.91233	-4.83023	-4.11046	-4.8775	-3.85997	-4.65528	-3.90288	-4.44162	-4.44411	-4.20167
9130019O22Rik	-3.95035	-4.02159	-4.39914	4.16062	-2.05708	2.26605	-2.43991	0.42608	-2.32736	4.06483	-1.74309	0.892804	-3.85997	4.52353	0.00401147	3.06348	-4.44411	3.89805
9130019P16Rik	-3.95035	-4.02159	2.09463	-1.82003	-1.50069	2.48525	6.28512	6.04746	-3.91233	2.58458	1.32517	2.96234	-3.85997	-0.564426	-3.90288	-2.82809	2.24239	-2.61671
9130023H24Rik	-2.36539	-4.02159	-0.939709	0.0205997	1.13158	4.61987	-4.76184	3.6346	-3.91233	2.16683	4.55345	3.56096	-3.85997	-3.07032	5.6427	3.97851	3.52744	-2.61671
9130024F11Rik	-3.95035	-4.02159	-4.39914	-4.14772	-3.82261	-5.27683	-4.76184	-4.21778	-3.91233	-4.83023	-4.11046	-4.8775	-3.85997	-4.65528	-3.90288	3.83915	-4.44411	-4.20167
9130204L05Rik	-3.95035	-4.02159	-4.39914	-4.14772	-3.82261	-5.27683	-4.76184	-4.21778	-3.91233	-4.83023	-4.11046	-4.8775	-3.85997	-4.65528	-3.90288	-4.44162	-4.44411	-4.20167
9130209A04Rik	-3.95035	-4.02159	-4.39914	-4.14772	-3.82261	-5.27683	-4.76184	-4.21778	-3.91233	-4.83023	-4.11046	-4.8775	-3.85997	-4.65528	-3.90288	-4.44162	-4.44411	-4.20167
9130221F21Rik	-3.95035	-4.02159	-4.39914	-4.14772	-3.82261	-5.27683	-4.76184	-4.21778	-3.91233	-4.83023	-4.11046	-4.8775	-3.85997	-4.65528	-3.90288	-4.44162	-4.44411	-4.20167
9130221H12Rik	-2.36539	1.90393	-1.22922	0.74855	3.20838	1.46248	-0.213404	1.55305	-3.91233	-0.665125	6.74903	-0.304607	-3.85997	3.37263	-2.29881	1.37139	-4.44411	-4.20167
9130227L01Rik	-3.95035	-4.02159	-4.39914	-4.14772	-3.82261	-5.27683	-4.76184	-4.21778	-3.91233	-4.83023	-4.11046	-4.8775	-3.85997	-4.65528	-3.90288	-4.44162	-4.44411	-4.20167
9130230L23Rik	-3.95035	-4.02159	-4.39914	-4.14772	-3.82261	-5.27683	-4.76184	-4.21778	-3.91233	-4.83023	-4.11046	-4.8775	-3.85997	-4.65528	-3.90288	-4.44162	-4.44411	-4.20167
9130401M01Rik	6.05387	-2.43663	2.23022	0.100206	-3.82261	3.0496	4.42055	-4.21778	1.37308	4.07365	2.26458	4.24921	-1.53804	-3.07032	0.184584	-1.63426	-2.85915	1.86442
9130409I23Rik	-3.95035	-4.02159	-4.39914	-4.14772	-3.82261	-3.69187	-4.76184	-4.21778	-3.91233	-4.83023	-4.11046	-4.8775	-3.85997	-4.65528	-3.90288	-4.44162	-4.44411	-4.20167
9230009I02Rik	-3.95035	-4.02159	-4.39914	-4.14772	-3.82261	-5.27683	-4.76184	-4.21778	-3.91233	-4.83023	-4.11046	-4.8775	-3.85997	-4.65528	-3.90288	-4.44162	-4.44411	-4.20167
9230102K24Rik	-3.95035	-4.02159	-4.39914	-4.14772	-3.82261	-5.27683	-4.76184	-4.21778	-3.91233	-4.83023	-4.11046	-4.8775	-3.85997	-4.65528	-3.90288	-4.44162	-4.44411	-4.20167
9230102O04Rik	-3.95035	-4.02159	-4.39914	-4.14772	-3.82261	-5.27683	-4.76184	-4.21778	-3.91233	-4.83023	-4.11046	-4.8775	-3.85997	-4.65528	-3.90288	-4.44162	-4.44411	-4.20167
9230104L09Rik	-3.95035	-4.02159	-4.39914	-4.14772	-3.82261	-5.27683	-4.76184	-4.21778	-3.91233	-4.83023	-4.11046	-4.8775	-3.85997	-4.65528	-3.90288	-4.44162	-4.44411	-4.20167
9230105E05Rik	-3.95035	-4.02159	-4.39914	-4.14772	-3.82261	-5.27683	-4.76184	-4.21778	-3.91233	-4.83023	-4.11046	-4.8775	-3.85997	-4.65528	-3.90288	-4.44162	-4.44411	-4.20167
9230110C19Rik	-3.95035	-4.02159	-4.39914	-4.14772	-3.82261	-5.27683	-4.76184	-4.21778	-3.91233	-4.83023	-4.11046	-4.8775	-3.85997	-4.65528	-3.90288	-4.44162	-4.44411	-4.20167
9230110F15Rik	-3.95035	-4.02159	-4.39914	-4.14772	-3.82261	-5.27683	-4.76184	-4.21778	-3.91233	-4.83023	-4.11046	-4.8775	-3.85997	-4.65528	-3.90288	-4.44162	-4.44411	-4.20167
9230112D13Rik	-3.95035	-4.02159	-4.39914	-4.14772	-3.82261	-5.27683	-4.76184	-4.21778	-3.91233	-4.83023	-4.11046	-4.8775	-3.85997	-4.65528	-3.90288	-4.44162	-4.44411	-4.20167
9230112J17Rik	-3.95035	-4.02159	-4.39914	-4.14772	-3.82261	-5.27683	-4.76184	-4.21778	-3.91233	-4.83023	-4.11046	-4.8775	-3.85997	-4.65528	-3.90288	-4.44162	-4.44411	-4.20167
9230114K14Rik	-3.95035	-4.02159	-2.07721	-4.14772	-3.82261	1.26233	-4.76184	0.736421	-3.91233	-0.582305	-4.11046	-4.8775	-3.85997	-4.65528	-3.90288	2.03411	-4.44411	-4.20167
9230116L04Rik	-3.95035	-4.02159	1.38222	-4.14772	1.13344	0.369335	-4.76184	-4.21778	-3.91233	-4.83023	-4.11046	-4.8775	-3.85997	-4.65528	4.06866	-4.44162	0.765345	-4.20167
9230116N13Rik	-3.95035	-4.02159	-4.39914	-4.14772	-3.82261	-5.27683	-3.17688	-4.21778	-3.91233	-4.83023	2.33248	-4.8775	-3.85997	-4.65528	1.65171	-2.85666	-4.44411	-4.20167
9330020H09Rik	-3.95035	6.43886	-4.39914	4.04704	-1.50069	-1.0289	2.68937	-4.21778	-3.91233	2.46439	-4.11046	-3.29253	-3.85997	2.37814	-3.90288	-2.85666	4.01122	-1.87974
9330102E08Rik	-3.95035	-4.02159	-4.39914	-4.14772	3.88475	3.39913	-4.76184	4.86703	-3.91233	-4.83023	-4.11046	2.69993	-2.27501	-4.65528	-3.90288	-4.44162	-2.85915	-4.20167
9330111N05Rik	-3.95035	-4.02159	-4.39914	-4.14772	-3.82261	-5.27683	-4.76184	-4.21778	-3.91233	-4.83023	-4.11046	-4.8775	-3.85997	-4.65528	-3.90288	-4.44162	-4.44411	-4.20167
9330117O12Rik	-3.95035	-4.02159	-4.39914	-4.14772	-3.82261	-5.27683	-4.76184	-4.21778	-3.91233	-4.83023	-4.11046	-4.8775	-3.85997	-4.65528	-3.90288	-4.44162	-4.44411	-4.20167
9330133O14Rik	4.79449	4.52915	2.01025	3.75315	5.6832	5.07742	-3.17688	3.94713	-3.91233	3.84572	1.72243	1.31233	2.67919	-4.65528	-2.31792	-4.44162	3.43241	1.29019
9330151L19Rik	1.25911	1.33596	5.34024	4.22297	3.62397	4.61474	4.89458	3.95435	-2.32736	5.34776	3.38938	3.71869	-1.52083	4.10899	7.01375	6.72517	6.61185	6.75616
9330158H04Rik	-3.95035	-4.02159	-4.39914	-4.14772	-3.82261	-5.27683	-4.76184	-4.21778	-3.91233	-4.83023	-4.11046	-4.8775	-3.85997	-4.65528	-3.90288	-4.44162	-4.44411	-4.20167
9330159F19Rik	-0.490916	-4.02159	-4.39914	-4.14772	-3.82261	-5.27683	-4.76184	-4.21778	-3.91233	1.1005	-4.11046	-4.8775	-3.85997	-4.65528	-3.90288	-4.44162	-1.27418	-4.20167
9330159M07Rik	-2.36539	-4.02159	-4.39914	4.27434	6.79485	3.58426	-3.17688	4.13537	-3.91233	2.42716	-0.940537	3.90531	-3.85997	1.94463	-1.58095	-2.11969	-4.44411	0.55322
9330162012Rik	-3.95035	-4.02159	-4.39914	-4.14772	-3.82261	-5.27683	-4.76184	-4.21778	-3.91233	-4.83023	-4.11046	-4.8775	-3.85997	-4.65528	-3.90288	-4.44162	-4.44411	-4.20167
9330162B11Rik	-3.95035	-4.02159	-4.39914	-4.14772	-3.82261	-5.27683	-4.76184	-4.21778	-3.91233	-4.83023	-4.11046	-4.8775	-3.85997	-4.65528	-3.90288	-4.44162	3.11813	-4.20167
9330175E14Rik	-3.95035	-4.02159	-4.39914	-4.14772	-3.82261	-2.1069	-4.76184	-4.21778	-3.91233	-4.83023	-4.11046	-4.8775	-3.85997	-4.65528	-3.90288	-4.44162	-4.44411	-4.20167
9330175M20Rik	-3.95035	-4.02159	-4.39914	-4.14772	-3.82261	-5.27683	-4.76184	-4.21778	-3.91233	-4.83023	-4.11046	-4.8775	-3.85997	-4.65528	-3.90288	-4.44162	-4.44411	-4.20167
9330178D15Rik	-3.95035	-4.02159	-4.39914	-4.14772	-3.82261	-5.27683	-4.76184	-4.21778	-3.91233	-4.83023	-4.11046	-4.8775	-3.85997	-4.65528	-3.90288	-4.44162	-4.44411	-4.20167
9330179D12Rik	-3.95035	-4.02159	-4.39914	-4.14772	-3.82261	-5.27683	-4.76184	-4.21778	-3.91233	-4.83023	-4.11046	-4.8775	-3.85997	-4.65528	-3.90288	-4.44162	-4.44411	-4.20167
9330182L06Rik	-3.95035	-4.02159	-4.39914	-4.14772	-3.82261	-5.27683	0.367442	-4.21778	-3.91233	-4.83023	-4.11046	0.737213	-3.85997	-0.567817	-3.90288	-4.44162	-4.44411	-4.20167
9330182O14Rik	-3.95035	-4.02159	-4.39914	-4.14772	-3.82261	-5.27683	-4.76184	-4.21778	-3.91233	-4.83023	-4.11046	-4.8775	-3.85997	-4.65528	-3.90288	-4.44162	-4.44411	-4.20167
9330188P03Rik	-3.95035	-4.02159	-4.39914	-4.14772	-3.82261	-5.27683	-4.76184	-4.21778	-3.91233	-4.83023	-4.11046	-4.8775	-3.85997	-4.65528	-3.90288	-4.44162	-4.44411	-4.20167
9430007A20Rik	-3.95035	-4.02159	-4.39914	-4.14772	-3.82261	-5.27683	-4.76184	-4.21778	-3.91233	-4.83023	-4.11046	-4.8775	-3.85997	-4.65528	-3.90288	-4.44162	-4.44411	-4.20167
9430008C03Rik	-3.95035	-4.02159	1.38222	5.11672	3.5083	4.68751	3.30962	3.07685	-1.10497	4.40578	-4.11046	3.39397	2.96021	-4.65528	3.93632	-2.11969	-4.44411	5.79692
9430014N10Rik	-3.95035	-4.02159	-4.39914	-4.14772	-3.82261	-5.27683	-4.76184	-4.21778	-3.91233	-4.83023	-4.11046	-4.8775	-3.85997	-4.65528	-3.90288	-4.44162	-4.44411	-4.20167
9430015G10Rik	-1.62842	0.501968	4.29086	2.26167	7.14677	2.52407	3.74991	3.32912	6.57048	4.51184	-1.78853	5.16826	5.40916	5.29455	4.51075	1.11297	3.51589	5.57477
9430016H08Rik	0.804539	-4.02159	-4.39914	-4.14772	-3.82261	1.84211	-4.76184	-4.21778	-3.91233	2.80639	3.83791	2.60632	-1.53804	2.03122	-1.58095	0.984646	-4.44411	-4.20167
9430018G01Rik	-1.14299	-4.02159	-4.39914	-1.82579	-3.82261	-5.27683	-4.76184	0.305786	-3.91233	-4.83023	-4.11046	-4.8775	-3.85997	-4.65528	-3.90288	-4.44162	-4.44411	2.74085
9430019J16Rik	-3.95035	-4.02159	-4.39914	-4.14772	-3.82261	-5.27683	-4.76184	-4.21778	-3.91233	-4.83023	-4.11046	-4.8775	-3.85997	-4.65528	-3.90288	-4.44162	-4.44411	-4.20167
9430020K01Rik	-1.62842	-4.02159	-4.39914	-4.14772	-3.82261	-2.1069	-4.76184	-4.21778	-3.91233	-4.83023	-4.11046	-0.970606	-3.85997	-4.65528	-3.90288	-4.44162	-4.44411	3.36057
9430021M05Rik	-3.95035	-4.02159	-4.39914	-4.14772	-3.82261	-5.27683	-4.76184	-4.21778	-3.91233	-4.83023	-4.11046	-4.8775	-3.85997	-4.65528	-3.90288	-4.44162	-4.44411	-4.20167
9430037G07Rik	-3.95035	-4.02159	-2.07721	-2.56276	-0.122174	0.451092	-4.76184	0.305786	-3.91233	-4.83023	-4.11046	3.61836	-3.85997	0.630122	-2.31792	-0.354156	-4.44411	-4.20167
9430038I01Rik	-3.95035	-4.02159	-4.39914	-4.14772	-3.82261	3.00394	3.95584	-4.21778	-3.91233	4.18936	-2.5255	-1.41806	5.7418	-0.95484	4.41453	-1.63426	-4.44411	-4.20167
9430041J12Rik	-3.95035	-4.02159	-4.39914	-4.14772	-3.82261	-5.27683	-4.76184	-4.21778	0.479992	-4.83023	-4.11046	-4.8775	-3.85997	-4.65528	-3.90288	-4.44162	-4.44411	-0.294777
9430060I03Rik	-3.95035	-4.02159	-4.39914	-4.14772	-3.82261	-1.8174	-4.76184	-4.21778	-3.91233	-4.83023	-4.11046	1.96799	-3.85997	-4.65528	-3.90288	-4.44162	-4.44411	-4.20167
9430069I07Rik	-3.95035	-4.02159	-4.39914	-4.14772	-3.82261	-5.27683	-4.76184	-4.21778	-3.91233	-4.83023	-4.11046	-4.8775	-3.85997	-4.65528	-3.90288	-4.44162	-4.44411	-4.20167
9430076C15Rik	-3.95035	-4.02159	-4.39914	-4.14772	-3.82261	-5.27683	-4.76184	-4.21778	-3.91233	-4.83023	-4.11046	-4.8775	-3.85997	-4.65528	-3.90288	-4.44162	-4.44411	-4.20167
9430083A17Rik	-3.95035	-4.02159	-4.39914	-4.14772	-3.82261	-0.521941	-4.76184	-4.21778	-3.91233	-4.83023	-4.11046	3.13931	-2.27501	-4.65528	-3.90288	-4.44162	-4.44411	-4.20167
9430091E24Rik	-3.95035	-4.02159	-4.39914	0.71026	0.264849	-0.753266	-0.85495	0.174542	3.68013	2.2678	-2.5255	4.40559	-3.85997	-0.95484	5.74278	-4.44162	1.74572	3.43496
9530002B09Rik	-3.95035	-4.02159	-4.39914	-4.14772	-3.82261	-5.27683	-4.76184	-4.21778	-3.91233	-4.83023	-4.11046	-4.8775	-3.85997	-4.65528	-3.90288	-4.44162	-4.44411	-4.20167
9530003J23Rik	-3.95035	-4.02159	-4.39914	-4.14772	-3.82261	-5.27683	-4.76184	-4.21778	-3.91233	-4.83023	-4.11046	-4.8775	-3.85997	-4.65528	-3.90288	-4.44162	-4.44411	-4.20167
9530026F06Rik	-3.95035	-4.02159	-4.39914	-4.14772	-3.82261	-5.27683	-4.76184	-4.21778	-3.91233	-4.83023	-4.11046	-4.8775	-3.85997	-4.65528	-3.90288	-4.44162	-4.44411	-4.20167
9530026P05Rik	-3.95035	-4.02159	-4.39914	-4.14772	-3.82261	-5.27683	-4.76184	-4.21778	-3.91233	-4.83023	-4.11046	-4.8775	-3.85997	-4.65528	-3.90288	-4.44162	-4.44411	-4.20167
9530027J09Rik	1.5857	-4.02159	-4.39914	-2.56276	3.46075	-5.27683	-2.91384	-4.21778	-3.91233	0.783299	5.36847	2.06149	-3.85997	1.36709	-3.90288	-4.44162	1.21467	-4.20167
9530036O11Rik	-3.95035	-4.02159	-4.39914	-4.14772	-3.82261	-5.27683	-4.76184	-4.21778	-3.91233	-4.83023	-4.11046	-4.8775	-3.85997	-4.65528	-3.90288	-4.44162	-4.44411	-4.20167
9530051G07Rik	-3.95035	-4.02159	-4.39914	-4.14772	-3.82261	-1.36994	-4.76184	-4.21778	-3.91233	-4.83023	-4.11046	-4.8775	-3.85997	-4.65528	-3.90288	-4.44162	-4.44411	-4.20167
9530052E02Rik	-3.95035	-4.02159	-4.39914	-4.14772	-3.82261	-2.9549	-4.76184	-4.21778	-3.91233	-4.83023	-4.11046	-4.8775	-3.85997	-4.65528	-3.90288	-4.44162	-4.44411	-4.20167
9530059O14Rik	-3.95035	-4.02159	-4.39914	-4.14772	-3.82261	-5.27683	-4.76184	-4.21778	-3.91233	-4.83023	-1.78853	-4.8775	-3.85997	-4.65528	-3.90288	-4.44162	-4.44411	-4.20167
9530068E07Rik	4.5614	6.84337	7.34022	8.56287	5.40861	7.25333	8.51704	7.38167	6.53372	7.97732	6.97368	7.11154	8.45036	8.49336	6.60194	6.28545	5.61253	8.76358
9530077C05Rik	-3.95035	-4.02159	-0.151213	-4.14772	2.19975	0.215025	-4.76184	-4.21778	-3.91233	-4.83023	-4.11046	-4.8775	-3.85997	-4.65528	-3.90288	-4.44162	-4.44411	-4.20167
9530080O11Rik	-3.95035	-4.02159	-4.39914	-4.14772	-3.82261	-5.27683	-4.76184	-4.21778	-3.91233	-4.83023	-4.11046	-4.8775	-3.85997	-4.65528	-3.90288	-4.44162	-4.44411	-4.20167
9530082P21Rik	4.6004	-4.02159	-2.81418	6.35908	-2.23765	2.64798	-4.76184	-4.21778	-2.32736	5.81272	5.32625	2.15593	-3.85997	2.03122	-2.31792	-4.44162	-4.44411	-0.114205
9530091C08Rik	-3.95035	-4.02159	-4.39914	-4.14772	-3.82261	0.989959	-4.76184	-4.21778	-3.91233	-4.83023	-4.11046	-0.23364	-3.85997	-4.65528	0.345048	-4.44162	-4.44411	-4.20167
9630001P10Rik	-3.95035	-4.02159	-4.39914	-4.14772	-3.82261	-5.27683	-4.76184	-4.21778	-3.91233	-4.83023	-4.11046	-4.8775	-3.85997	-4.65528	-3.90288	-4.44162	-4.44411	-4.20167
9630013A20Rik	-3.95035	-4.02159	-4.39914	-4.14772	-3.82261	-5.27683	-4.76184	-4.21778	-3.91233	-4.83023	-4.11046	-4.8775	-3.85997	-4.65528	-3.90288	-4.44162	-4.44411	-4.20167
9630028B13Rik	-3.95035	-4.02159	-4.39914	-4.14772	-3.82261	-5.27683	-4.76184	-2.63281	-3.91233	-4.83023	-4.11046	-4.8775	-3.85997	-4.65528	1.93001	-4.44162	-4.44411	-4.20167
9630028H03Rik	-3.95035	-4.02159	-4.39914	-4.14772	-3.82261	-5.27683	-4.76184	-4.21778	-3.91233	-4.83023	-4.11046	-4.8775	-3.85997	-4.65528	-3.90288	-4.44162	-4.44411	-4.20167
9630033F20Rik	1.00385	-4.02159	-4.39914	0.496135	-3.82261	4.04735	2.00634	1.71296	-3.91233	1.91123	3.29042	-0.629569	-3.85997	-4.65528	-3.90288	4.1471	2.1558	-2.61671
9830107B12Rik	-3.95035	-4.02159	-4.39914	-4.14772	-3.82261	-5.27683	-4.76184	-4.21778	-3.91233	-4.83023	-4.11046	-4.8775	-3.85997	-4.65528	-3.90288	-4.44162	-4.44411	-4.20167
9830132P13Rik	-3.95035	-4.02159	-4.39914	-4.14772	-3.82261	-5.27683	-4.76184	-4.21778	-3.91233	-4.83023	-4.11046	-4.8775	-3.85997	-4.65528	-3.90288	-4.44162	-4.44411	-4.20167
9830147E19Rik	-2.36539	-2.43663	3.20819	5.34613	2.51724	3.18391	3.97625	-0.130313	6.74763	3.6044	2.11836	1.31233	5.39506	6.98993	-0.732954	4.27606	5.62063	4.67178
9830166K06Rik	-3.95035	-4.02159	-4.39914	-4.14772	-3.82261	-5.27683	-4.76184	-4.21778	-3.91233	-4.83023	-4.11046	-4.8775	-3.85997	-4.65528	-3.90288	-4.44162	-4.44411	-4.20167
9930012K11Rik	-3.95035	-4.02159	-4.39914	-4.14772	-3.82261	-1.36994	-4.76184	-4.21778	-3.91233	-4.83023	-4.11046	-4.8775	-3.85997	-4.65528	-3.90288	-4.44162	0.413873	-4.20167
9930014A18Rik	-3.95035	-1.69967	-4.39914	-4.14772	3.67723	-5.27683	-4.76184	-4.21778	-3.91233	-4.83023	-4.11046	-4.8775	-3.85997	-4.65528	-3.90288	-4.44162	-4.44411	2.49711
9930021J03Rik	5.02979	6.20361	6.88453	7.21696	7.05467	7.50678	7.42396	7.18577	4.66887	8.25208	7.69327	6.8483	7.70656	5.99667	6.29802	7.5093	9.78629	5.89768
9930104L06Rik	-3.95035	-0.114703	-2.07721	3.10967	-1.50069	3.93506	-4.76184	-4.21778	0.611236	2.89087	-2.5255	4.72427	2.47988	1.17761	-3.90288	6.00443	1.96528	-0.294777
9930111H07Rik	-3.95035	-4.02159	-4.39914	-4.14772	-3.82261	-5.27683	-4.76184	-4.21778	-3.91233	-4.83023	-4.11046	-4.8775	-3.85997	-4.65528	-3.90288	-4.44162	-4.44411	-4.20167
9930111J21Rik1	7.4299	6.529	7.26398	7.58844	6.72036	7.74268	8.06724	10.1512	8.47981	8.70346	6.9526	7.93815	6.1637	7.17159	8.33033	8.48415	8.75081	8.42317
9930111J21Rik2	8.85182	7.00364	6.66336	4.33327	4.89869	6.28941	5.51963	2.85068	-3.91233	6.61069	7.48584	5.51263	4.63588	4.90608	4.65722	7.3691	5.21013	5.31647
a	-3.95035	-4.02159	-4.39914	-4.14772	-3.82261	-5.27683	-4.76184	-4.21778	-3.91233	-4.83023	-4.11046	-4.8775	-3.85997	-4.65528	-3.90288	-4.44162	-4.44411	-4.20167
A130010J15Rik	3.76541	8.41696	0.60626	1.88482	4.61335	5.35622	3.28179	4.64331	-2.32736	5.31751	2.8084	4.20997	-0.400539	5.1837	4.51472	3.505	5.2572	-2.61671
A130077B15Rik	1.00385	2.24519	-2.81418	-0.240831	4.98796	3.92039	3.41308	4.37841	-1.10497	3.17539	-0.65103	3.09405	0.783886	3.38364	6.42018	-2.85666	-2.85915	6.27102
A1bg	-3.95035	-4.02159	-4.39914	-4.14772	-3.82261	-5.27683	-4.76184	-4.21778	-3.91233	-4.83023	-4.11046	-4.8775	-3.85997	-4.65528	-3.90288	-4.44162	-4.44411	-4.20167
A1cf	-3.95035	-4.02159	-4.39914	-4.14772	-3.82261	-5.27683	-4.76184	-4.21778	-3.91233	-4.83023	-4.11046	-4.8775	-3.85997	-4.65528	-3.90288	-4.44162	-4.44411	-4.20167
A230001M10Rik	-3.95035	-4.02159	-4.39914	-4.14772	-3.82261	-5.27683	-4.76184	-4.21778	-3.91233	-4.83023	-4.11046	-4.8775	-3.85997	-4.65528	-3.90288	-4.44162	-4.44411	-4.20167
A230009B12Rik	-3.95035	-4.02159	-4.39914	-1.82579	-3.82261	-5.27683	-4.76184	-4.21778	-3.91233	-4.83023	-4.11046	-4.8775	-3.85997	-4.65528	-3.90288	-4.44162	-4.44411	-4.20167
A230020J21Rik	-3.95035	-4.02159	-4.39914	-4.14772	-3.82261	-5.27683	-4.76184	-4.21778	-3.91233	0.680096	-4.11046	-4.8775	-3.85997	-4.65528	-3.90288	-4.44162	-4.44411	-4.20167
A230028O05Rik	-3.95035	-4.02159	-4.39914	-4.14772	-3.82261	-5.27683	-4.76184	-4.21778	-3.91233	-4.83023	-4.11046	-4.8775	-3.85997	-4.65528	-3.90288	-4.44162	-4.44411	-4.20167
A230046K03Rik	8.5842	7.83678	8.24494	7.98317	6.84183	7.21828	8.25096	7.70444	7.71018	7.84241	6.09777	7.11083	8.0518	6.76099	7.71597	8.12705	9.29198	7.39126
A230050P20Rik	-1.14299	1.47026	2.69889	-4.14772	4.92893	3.59662	5.41433	-1.89585	-1.10497	1.50962	-4.11046	2.32218	-1.53804	-0.131718	-3.90288	2.42875	-2.85915	6.24645
A230056J06Rik	-3.95035	-4.02159	-4.39914	-4.14772	-3.82261	1.88304	4.14805	-4.21778	-3.91233	-4.83023	-4.11046	-4.8775	-3.85997	2.58312	-3.90288	-4.44162	-2.85915	-4.20167
A230056P14Rik	-3.95035	-4.02159	-4.39914	-4.14772	0.377451	-2.9549	-4.76184	-2.63281	0.863778	-0.353851	-2.5255	-4.8775	-3.85997	-4.65528	-0.193588	-4.44162	-1.76604	-4.20167
A230057D06Rik	-3.95035	-4.02159	-4.39914	-4.14772	-3.82261	-5.27683	-4.76184	-4.21778	-3.91233	-4.83023	-4.11046	-4.8775	-3.85997	-4.65528	-3.90288	-4.44162	-4.44411	-4.20167
A230065H16Rik	-3.95035	-4.02159	-4.39914	-4.14772	-3.82261	-5.27683	-4.76184	-4.21778	-3.91233	-4.83023	-4.11046	-4.8775	-3.85997	-4.65528	-3.90288	-4.44162	-4.44411	-4.20167
A230070E04Rik	-3.95035	-4.02159	-4.39914	-4.14772	-3.82261	-5.27683	-4.76184	-4.21778	-3.91233	-4.83023	-4.11046	-4.8775	-3.85997	-4.65528	-3.90288	-4.44162	-4.44411	-4.20167
A230072C01Rik	-3.95035	-4.02159	-4.39914	-4.14772	-3.82261	3.1867	-4.76184	-4.21778	3.92688	0.951127	2.4287	0.548768	2.44381	1.41081	-3.90288	-2.85666	4.1816	1.63122
A230072E10Rik	-3.95035	-4.02159	2.14002	-4.14772	-3.82261	-0.521941	-4.76184	-4.21778	-3.91233	-4.83023	-4.11046	1.75186	-3.85997	-4.65528	1.2264	-4.44162	-4.44411	-2.61671
A230073K19Rik	3.38057	-0.551708	4.80141	-4.14772	0.604992	2.81	3.29366	5.36369	-1.49549	3.15902	5.44259	2.76823	-2.27501	5.96547	3.03964	2.13006	-1.09079	-0.12101
A230077H06Rik	-3.95035	-4.02159	-4.39914	-4.14772	-3.82261	-5.27683	-4.76184	-4.21778	-3.91233	-4.83023	-4.11046	-4.8775	-3.85997	-4.65528	-3.90288	-4.44162	-4.44411	-4.20167
A230103J11Rik	-3.95035	-4.02159	-4.39914	-4.14772	-3.82261	0.277761	-4.76184	-4.21778	-3.91233	-4.83023	-4.11046	-0.353935	-3.85997	-4.65528	-3.90288	-4.44162	0.913444	-4.20167
A230108P19Rik	-3.95035	-4.02159	-4.39914	-4.14772	-3.82261	-5.27683	-4.76184	-4.21778	-3.91233	-4.83023	-4.11046	-4.8775	-3.85997	-4.65528	-3.90288	-4.44162	-4.44411	-4.20167
A2m	-3.95035	-4.02159	-4.39914	-4.14772	-3.82261	-5.27683	-4.76184	-4.21778	-3.91233	-4.83023	-4.11046	-4.8775	-3.85997	-4.65528	-3.90288	-4.44162	-4.44411	-4.20167
A330009N23Rik	-3.95035	-4.02159	-4.39914	-4.14772	-3.82261	-5.27683	-4.76184	-4.21778	-3.91233	-4.83023	-4.11046	-4.8775	-3.85997	-4.65528	1.05132	-4.44162	-4.44411	-4.20167
A330021E22Rik	-3.95035	-4.02159	-4.39914	-4.14772	-3.82261	-5.27683	-4.76184	-4.21778	-3.91233	-4.83023	-4.11046	-4.8775	-3.85997	-4.65528	-3.90288	-4.44162	-4.44411	-4.20167
A330023F24Rik	-0.780423	0.370724	0.645254	5.39338	4.83916	5.12725	1.01952	-4.21778	-2.32736	3.27306	0.281856	3.45789	-2.27501	1.75411	4.05712	2.12824	-0.743669	7.52412
A330032B11Rik	-3.95035	-4.02159	-4.39914	-4.14772	3.5083	-5.27683	-4.76184	-1.89585	-3.91233	-1.3708	-1.78853	-4.8775	-3.85997	-4.65528	-3.90288	-4.44162	-4.44411	-4.20167
A330033J07Rik	-3.95035	-4.02159	-4.39914	-4.14772	-3.82261	-5.27683	-4.76184	-4.21778	-3.91233	-4.83023	-4.11046	-4.8775	-3.85997	-4.65528	-3.90288	-4.44162	-4.44411	-4.20167
A330035P11Rik	-2.36539	-2.43663	-4.39914	6.9123	-3.82261	-0.0673747	0.282553	-4.21778	-3.91233	-4.83023	-0.65103	1.59824	-3.85997	-4.65528	-3.90288	-4.44162	-4.44411	-4.20167
A330040F15Rik	-2.36539	-2.43663	2.23022	2.11907	-3.82261	-3.69187	-4.76184	-4.21778	-3.91233	2.28871	-4.11046	-1.41806	-3.85997	-3.07032	-3.90288	0.416362	-2.85915	-0.501228
A330041J22Rik	-3.95035	-4.02159	-4.39914	-4.14772	-3.82261	-5.27683	-4.76184	-4.21778	-3.91233	-4.83023	-4.11046	-4.8775	-3.85997	-4.65528	-3.90288	-4.44162	-4.44411	-4.20167
A330048O09Rik	-3.95035	-4.02159	-4.39914	-4.14772	-3.82261	-5.27683	-4.76184	-4.21778	-3.91233	-4.83023	-4.11046	-4.8775	-3.85997	-4.65528	-3.90288	-4.44162	-4.44411	-4.20167
A330049N07Rik	-3.95035	-4.02159	-4.39914	-4.14772	-3.82261	-5.27683	-4.76184	-4.21778	-3.91233	-4.83023	-4.11046	-4.8775	-3.85997	-4.65528	-3.90288	-4.44162	-4.44411	-4.20167
A330050F15Rik	-3.95035	-4.02159	-4.39914	-4.14772	-3.82261	-5.27683	-4.76184	-4.21778	-3.91233	-4.83023	-4.11046	-4.8775	-3.85997	-4.65528	-3.90288	-4.44162	-4.44411	-4.20167
A330069E16Rik	-3.95035	-4.02159	-4.39914	-4.14772	-3.82261	-1.0289	-4.76184	-4.21778	-3.91233	0.784477	-4.11046	-2.55557	-3.85997	-4.65528	1.2264	-4.44162	-4.44411	-4.20167
A330070K13Rik	-3.95035	-4.02159	-4.39914	-4.14772	-3.82261	-5.27683	-4.76184	-4.21778	-3.91233	-4.83023	-4.11046	-4.8775	-3.85997	-4.65528	-3.90288	-4.44162	-4.44411	-4.20167
A330074K22Rik	-3.95035	-4.02159	-4.39914	-4.14772	-3.82261	-5.27683	-4.76184	-4.21778	-3.91233	-4.83023	-4.11046	-4.8775	-3.85997	-4.65528	-3.90288	-4.44162	-4.44411	-4.20167
A330076C08Rik	-3.95035	-4.02159	-4.39914	-4.14772	-3.82261	-5.27683	-4.76184	-4.21778	-3.91233	-4.83023	-4.11046	-4.8775	-3.85997	-4.65528	-3.90288	-4.44162	-4.44411	-4.20167
A330076H08Rik	-3.95035	-4.02159	-4.39914	-4.14772	-3.82261	-5.27683	-4.76184	-4.21778	-3.91233	-4.83023	-4.11046	-0.790034	-3.85997	-4.65528	-3.90288	-4.44162	-4.44411	-4.20167
A330093E20Rik	-3.95035	-4.02159	-4.39914	-4.14772	-3.82261	-5.27683	-4.76184	-4.21778	-3.91233	-4.83023	-4.11046	-4.8775	-3.85997	-4.65528	-3.90288	-4.44162	-4.44411	-4.20167
A330102I10Rik	-3.95035	-4.02159	-4.39914	-4.14772	-3.82261	-5.27683	-4.76184	-4.21778	-3.91233	-4.83023	-4.11046	-4.8775	-3.85997	-4.65528	-3.90288	-4.44162	-4.44411	-4.20167
A3galt2	-3.95035	-4.02159	-2.81418	-4.14772	-3.82261	-5.27683	-4.76184	2.62771	-3.91233	-4.83023	-4.11046	-4.8775	-3.85997	-4.65528	-3.90288	-4.44162	-4.44411	-4.20167
A430005L14Rik	2.81784	-1.69967	-2.81418	-4.14772	-2.23765	3.8956	-2.43991	4.40061	-3.91233	0.66162	-0.0229988	-4.8775	-3.85997	2.13914	-3.90288	1.39127	5.92331	-2.61671
A430033K04Rik	2.89514	-4.02159	5.05413	7.65923	2.68518	4.27199	3.50025	3.29792	3.70973	3.50516	4.9902	5.2505	5.41848	3.73274	3.7766	0.767835	3.99468	-4.20167
A430035B10Rik	-3.95035	-4.02159	-4.39914	-2.56276	-2.23765	-5.27683	2.81559	-4.21778	-3.91233	0.29905	-2.5255	-4.8775	-3.85997	-4.65528	1.71183	-4.44162	-4.44411	-4.20167
A430078G23Rik	-3.95035	-4.02159	-4.39914	-4.14772	-3.82261	-5.27683	-4.76184	-4.21778	-3.91233	-2.02288	-4.11046	-4.8775	-3.85997	-4.65528	-3.90288	-4.44162	-4.44411	-4.20167
A430088P11Rik	-3.95035	-4.02159	-4.39914	-4.14772	-3.82261	-5.27683	-4.76184	-4.21778	-3.91233	-4.83023	-4.11046	-4.8775	-3.85997	-4.65528	-3.90288	-4.44162	-4.44411	-4.20167
A430089I19Rik	-3.95035	-4.02159	-4.39914	-4.14772	-3.82261	-5.27683	-4.76184	-4.21778	-3.91233	-4.83023	-4.11046	-4.8775	-3.85997	-4.65528	-3.90288	-4.44162	-4.44411	-4.20167
A430090L17Rik	-3.95035	0.836387	-4.39914	-4.14772	-3.82261	-1.0289	-4.76184	-1.89585	-3.91233	3.84572	-2.5255	3.23625	-3.85997	2.35595	-3.90288	-4.44162	0.600286	-0.114205
A430093F15Rik	-3.95035	-4.02159	-4.39914	-4.14772	-3.82261	-5.27683	-4.76184	-4.21778	-3.91233	-4.83023	-4.11046	-4.8775	-3.85997	-4.65528	-3.90288	-4.44162	-4.44411	-4.20167
A430105I19Rik	-3.95035	-4.02159	-4.39914	-4.14772	1.03537	-5.27683	-4.76184	-4.21778	-3.91233	-4.83023	-4.11046	0.166898	-1.53804	-4.65528	-3.90288	-4.44162	-4.44411	-1.39431
A430107P09Rik	-3.95035	-4.02159	-4.39914	-4.14772	-3.82261	-5.27683	-4.76184	-4.21778	-3.91233	-4.83023	-4.11046	-4.8775	-3.85997	-4.65528	-3.90288	-4.44162	-4.44411	-4.20167
A4galt	-3.95035	-4.02159	-4.39914	-4.14772	-3.82261	-5.27683	-4.76184	-4.21778	-3.91233	-4.83023	-4.11046	-4.8775	-3.85997	-4.65528	-3.90288	-4.44162	-4.44411	-4.20167
A4gnt	-3.95035	-4.02159	-4.39914	-4.14772	-3.82261	-5.27683	-4.76184	-4.21778	-3.91233	-4.83023	-4.11046	-4.8775	-3.85997	-4.65528	-3.90288	-4.44162	-4.44411	-4.20167
A530006G24Rik	-3.95035	-4.02159	-4.39914	-4.14772	-3.82261	-5.27683	-4.76184	-4.21778	-3.91233	-4.83023	-4.11046	-4.8775	-3.85997	-4.65528	-3.90288	-4.44162	-4.44411	-4.20167
A530013C23Rik	-3.95035	-4.02159	-4.39914	-4.14772	-3.82261	-5.27683	-4.76184	-4.21778	-3.91233	-2.5083	-4.11046	-4.8775	-3.85997	-4.65528	-3.90288	-4.44162	-4.44411	-4.20167
A530016L24Rik	-3.95035	-4.02159	-4.39914	-4.14772	-3.82261	-5.27683	-4.76184	-4.21778	-3.91233	-4.83023	-4.11046	-4.8775	-3.85997	-4.65528	-3.90288	-4.44162	-4.44411	-4.20167
A530032D15Rik	-3.95035	-4.02159	-4.39914	-4.14772	-3.82261	-2.59876	-0.85495	-4.21778	-3.91233	-1.51409	-2.51591	-2.54407	-3.85997	-4.65528	-3.90288	-4.44162	-4.44411	-1.85684
A530046M15Rik	-3.95035	-4.02159	-4.39914	-4.14772	-3.82261	-5.27683	-4.76184	-4.21778	-3.91233	-4.83023	-4.11046	-4.8775	-3.85997	-4.65528	-3.90288	-4.44162	-4.44411	-4.20167
A530050N04Rik	-3.95035	-4.02159	-4.39914	-4.14772	-3.82261	-5.27683	-4.76184	-4.21778	-3.91233	-4.83023	-4.11046	-4.8775	-3.85997	-4.65528	-3.90288	-4.44162	-4.44411	-4.20167
A530053G22Rik	-3.95035	-4.02159	-4.39914	-4.14772	-3.82261	-5.27683	-4.76184	-4.21778	-3.91233	-4.83023	-4.11046	-4.8775	-3.85997	-4.65528	-3.90288	-4.44162	-4.44411	-4.20167
A530054K11Rik	6.59172	4.69368	4.62406	4.8793	5.07523	5.4525	6.09658	6.73561	3.73873	5.30932	5.99979	5.93513	5.05663	5.1176	5.9982	5.83565	6.93084	4.30383
A530058N18Rik	-3.95035	-4.02159	-4.39914	-4.14772	-3.82261	-5.27683	-4.76184	-4.21778	-3.91233	-4.83023	-4.11046	-4.8775	-3.85997	-4.65528	-3.90288	-4.44162	-4.44411	-4.20167
A530064D06Rik	-3.95035	-4.02159	-4.39914	-4.14772	-3.82261	-5.27683	-4.76184	-4.21778	-3.91233	-4.83023	-4.11046	-4.8775	-2.27501	-4.65528	-3.90288	-4.44162	-4.44411	-4.20167
A530065N20Rik	-3.95035	-4.02159	-4.39914	-4.14772	-3.82261	-5.27683	-4.76184	-4.21778	-3.91233	-4.83023	-4.11046	-4.8775	-3.85997	-4.65528	-3.90288	-4.44162	-4.44411	-4.20167
A530072M11Rik	-3.95035	-4.02159	-2.07721	0.71026	-3.82261	-2.9549	-4.76184	-4.21778	-3.91233	-4.83023	-0.0229988	-4.8775	-3.85997	-4.65528	-3.90288	-4.44162	-4.44411	-4.20167
A530088E08Rik	6.39406	-0.543916	3.93768	-4.14772	-1.01526	2.23982	4.11596	-4.21778	-3.91233	5.18683	3.77511	4.96227	-3.85997	4.4968	-3.90288	-2.85666	2.54571	-1.03174
A530099J19Rik	-3.95035	-4.02159	-4.39914	-4.14772	-3.82261	-5.27683	-4.76184	-4.21778	-3.91233	-4.83023	-4.11046	-4.8775	-3.85997	-4.65528	-3.90288	-4.44162	-4.44411	-4.20167
A630001G21Rik	5.86823	7.74037	5.64115	7.24406	7.99717	6.72352	7.52731	7.13151	8.45318	6.75895	5.93803	6.95895	5.71557	7.03341	6.86613	7.97597	7.358	5.77131
A630007B06Rik	6.69801	6.84027	4.24832	5.87048	6.77451	4.3175	5.96011	3.24983	6.64896	6.06079	3.25586	4.53825	2.98552	4.79799	3.80448	1.44102	3.62735	5.83588
A630010A05Rik	-3.95035	-4.02159	-4.39914	-4.14772	-3.82261	-5.27683	-4.76184	-4.21778	-3.91233	-4.83023	-4.11046	-4.8775	-3.85997	-4.65528	-3.90288	-4.44162	-4.44411	-4.20167
A630012P03Rik	-3.95035	-4.02159	-4.39914	-4.14772	-3.82261	-5.27683	-4.76184	-4.21778	-3.91233	-4.83023	-4.11046	-4.8775	-3.85997	-4.65528	-3.90288	-4.44162	-4.44411	-4.20167
A630019I02Rik	-3.95035	-4.02159	-4.39914	-4.14772	2.81778	3.20344	-4.76184	-4.21778	5.00367	3.67756	-4.11046	-3.20847	6.50637	4.46599	2.28695	-4.44162	-4.44411	3.07557
A630020A06	-3.95035	-4.02159	-4.39914	-4.14772	-3.82261	1.86272	-4.76184	-4.21778	-3.91233	-4.83023	-4.11046	-4.8775	-3.85997	-4.65528	-3.90288	-4.44162	-4.44411	-4.20167
A630023A22Rik	-3.95035	-4.02159	-4.39914	-4.14772	-3.82261	-5.27683	-4.76184	-4.21778	-3.91233	-4.83023	-4.11046	-4.8775	-3.85997	-4.65528	-3.90288	-4.44162	-4.44411	-4.20167
A630023P12Rik	-3.95035	-4.02159	-4.39914	-4.14772	-3.82261	-5.27683	-4.76184	-4.21778	-3.91233	-4.83023	-4.11046	-4.8775	-3.85997	-4.65528	-3.90288	-4.44162	-4.44411	-4.20167
A630033H20Rik	2.96852	4.72324	5.97915	4.56996	3.18861	3.61496	3.50962	3.95715	1.44523	4.02464	2.57604	1.94268	-1.53804	6.46041	4.34979	4.35604	3.61659	5.05808
A630066F11Rik	-3.95035	-4.02159	-4.39914	-4.14772	-3.82261	-1.36994	-4.76184	0.537112	-3.91233	-0.923342	-4.11046	1.56545	-3.85997	-4.65528	1.30657	-4.44162	3.33068	-4.20167
A630072M18Rik	-3.95035	-4.02159	1.0714	-4.14772	2.27331	6.0629	-3.14831	-1.75311	-3.91233	4.20616	-4.11046	3.29673	6.78078	-4.65528	-3.90288	-2.83755	1.44634	-0.876857
A630073D07Rik	-3.95035	-4.02159	-4.39914	-4.14772	-3.82261	-5.27683	-4.76184	-4.21778	-3.91233	-4.83023	-4.11046	-4.8775	-3.85997	-4.65528	-3.90288	-4.44162	-4.44411	-4.20167
A630075F10Rik	-3.95035	-4.02159	-4.39914	-4.14772	-3.82261	-5.27683	-4.76184	-4.21778	-3.91233	-4.83023	-4.11046	-4.8775	-3.85997	-4.65528	-3.90288	-4.44162	-4.44411	-4.20167
A630076J17Rik	-3.95035	-4.02159	-4.39914	-4.14772	-3.82261	-5.27683	-4.76184	-4.21778	-3.91233	-4.83023	-4.11046	-4.8775	-3.85997	-4.65528	-3.90288	-4.44162	-4.44411	-4.20167
A630077J23Rik	-3.95035	-4.02159	-4.39914	-4.14772	-3.82261	-5.27683	-4.76184	-4.21778	-3.91233	-4.83023	-4.11046	-4.8775	-3.85997	-4.65528	-3.90288	-4.44162	-4.44411	-4.20167
A630089N07Rik	-3.95035	2.16823	-4.39914	-4.14772	1.73197	0.605815	3.06471	2.55041	2.56341	-0.306671	-4.11046	3.02337	-3.85997	-3.07032	-0.202439	-4.44162	0.982156	-4.20167
A630095E13Rik	-3.95035	-4.02159	-4.39914	-4.14772	-3.82261	-5.27683	-4.76184	-4.21778	-3.91233	-4.83023	-4.11046	-4.8775	-3.85997	-4.65528	-3.90288	-4.44162	-4.44411	-4.20167
A630095N17Rik	-3.95035	-4.02159	-4.39914	-4.14772	-3.82261	-5.27683	-4.76184	-4.21778	-3.91233	-4.83023	-4.11046	-4.8775	-3.85997	-4.65528	-3.90288	-4.44162	-4.44411	-4.20167
A730006G06Rik	-3.95035	-4.02159	-4.39914	-4.14772	-3.82261	-5.27683	-4.76184	-4.21778	-3.91233	-4.83023	-4.11046	-4.8775	-3.85997	-4.65528	-3.90288	-4.44162	-4.44411	-4.20167
A730008H23Rik	3.9126	6.00573	4.31015	3.19977	-3.82261	2.07791	3.12994	-4.21778	2.68073	-2.22142	-4.11046	-4.8775	-3.85997	6.01408	-3.90288	-4.44162	1.29196	0.484273
A730017C20Rik	-3.95035	-4.02159	-4.39914	-4.14772	-3.82261	-1.18937	-4.76184	-4.21778	-3.91233	-4.83023	-4.11046	-4.8775	-3.85997	-4.65528	-3.90288	-4.44162	-4.44411	-4.20167
A730017L22Rik	-3.95035	-4.02159	-4.39914	-4.14772	-3.82261	-5.27683	3.52818	-4.21778	-3.91233	-4.83023	-4.11046	3.36568	3.62385	-4.65528	3.87191	-4.44162	-4.44411	-4.20167
A730018C14Rik	-3.95035	-4.02159	-4.39914	-4.14772	-3.82261	-5.27683	-4.76184	-4.21778	-3.91233	-4.83023	-4.11046	-4.8775	-3.85997	-4.65528	-3.90288	-4.44162	-4.44411	-4.20167
A730020E08Rik	-3.95035	-4.02159	-4.39914	-4.14772	-3.82261	-5.27683	-4.76184	-4.21778	-3.91233	-4.83023	-4.11046	-4.8775	-3.85997	-4.65528	-3.90288	-4.44162	-4.44411	-4.20167
A730020M07Rik	-3.95035	1.533	-4.39914	2.36007	3.49027	-5.27683	-4.76184	-4.21778	-3.91233	-4.83023	-4.11046	-4.8775	-3.85997	-4.65528	-3.90288	-4.44162	-4.44411	-4.20167
A730036I17Rik	-3.95035	-4.02159	-4.39914	-4.14772	-3.82261	-5.27683	-4.76184	-4.21778	-3.91233	-4.83023	-4.11046	-4.8775	-3.85997	-4.65528	-3.90288	-4.44162	-4.44411	-4.20167
A730043L09Rik	-3.95035	-4.02159	-4.39914	-4.14772	-3.82261	-5.27683	-4.76184	-4.21778	-3.91233	-4.83023	-4.11046	-4.8775	-3.85997	-4.65528	-3.90288	-4.44162	-4.44411	-4.20167
A730046J19Rik	-3.95035	-4.02159	-4.39914	-4.14772	-3.82261	-5.27683	-4.76184	-4.21778	-3.91233	-4.83023	-4.11046	-4.8775	-3.85997	-4.65528	-3.90288	-4.44162	-4.44411	-4.20167
A730056A06Rik	-3.95035	-4.02159	-4.39914	-4.14772	-3.82261	-5.27683	-4.76184	-4.21778	-3.91233	-4.83023	-4.11046	-4.8775	-3.85997	-4.65528	-3.90288	-4.44162	-4.44411	-4.20167
A730082K24Rik	-3.95035	-4.02159	-4.39914	-4.14772	-3.82261	-5.27683	-4.76184	-4.21778	-3.91233	-4.83023	-4.11046	-4.8775	-3.85997	-4.65528	-3.90288	-4.44162	-4.44411	-4.20167
A730085K08Rik	-3.95035	-4.02159	-4.39914	-4.14772	-3.82261	-5.27683	-4.76184	-4.21778	-3.91233	-4.83023	-4.11046	-4.8775	-3.85997	-4.65528	-3.90288	-4.44162	-4.44411	-4.20167
A730090H04Rik	-3.95035	-4.02159	-4.39914	-4.14772	-3.82261	-5.27683	-4.76184	-4.21778	-3.91233	-4.83023	-4.11046	-4.8775	-3.85997	-4.65528	-3.90288	-4.44162	-4.44411	-4.20167
A730090N16Rik	-3.95035	-2.43663	-4.39914	-4.14772	-3.82261	-2.9549	-4.76184	-4.21778	-3.91233	-1.12979	-4.11046	-4.8775	-3.85997	6.02508	4.17927	-2.11969	-4.44411	-4.20167
A730098P11Rik	0.206696	0.0297786	7.60658	3.62838	1.84925	3.70662	6.60696	2.49812	0.432503	3.58272	2.22761	2.83262	2.1853	3.72479	2.71595	3.33593	2.20292	2.10576
A830009L08Rik	-3.95035	-4.02159	-4.39914	-4.14772	-3.82261	-5.27683	3.10235	-4.21778	-3.91233	-4.83023	-4.11046	-4.8775	-3.85997	-4.65528	-3.90288	-4.44162	-4.44411	-4.20167
A830010M20Rik	-2.36539	4.06056	3.22291	3.36798	4.92893	3.28159	5.30021	5.9205	-1.5904	1.96418	2.4287	4.15868	-1.53804	4.35315	-1.09552	4.24138	4.48367	6.08489
A830018L16Rik	0.573214	-2.43663	-4.39914	-4.14772	-3.82261	-5.27683	-4.76184	-4.21778	-3.91233	-4.83023	3.58303	-4.8775	-3.85997	-4.65528	-3.90288	-2.85666	-4.44411	-4.20167
A830019L24Rik	-3.95035	-4.02159	-4.39914	-4.14772	-3.82261	-5.27683	-4.76184	-4.21778	-3.91233	-4.83023	-4.11046	-4.8775	-3.85997	-4.65528	-3.90288	-4.44162	-4.44411	-4.20167
A830052D11Rik	-3.95035	-2.43663	-4.39914	-4.14772	-0.363182	0.700452	-4.76184	-4.21778	-2.32736	3.5834	-4.11046	-0.23364	6.10726	4.19334	-1.58095	-4.44162	-4.44411	-4.20167
A830080D01Rik	0.297579	1.26381	-0.939709	5.76965	3.5083	3.62705	0.523561	4.09964	5.15107	2.73201	3.06945	4.47785	-1.05262	3.84058	0.00401147	3.42257	3.80856	1.47076
A830082K12Rik	-3.95035	-4.02159	-4.39914	-4.14772	-3.82261	-5.27683	2.10852	-4.21778	-3.91233	-4.83023	-4.11046	-4.8775	-3.85997	-4.65528	-3.90288	-4.44162	-4.44411	-4.20167
A830082N09Rik	2.89514	5.43168	-2.81418	-4.14772	2.51724	3.01319	-2.43991	-4.21778	6.95263	3.26252	1.6709	2.19932	-3.85997	-4.65528	3.6285	3.50675	-4.44411	-4.20167
A930001A20Rik	-3.95035	-4.02159	-4.39914	-4.14772	-3.82261	-5.27683	-4.76184	-4.21778	-3.91233	-4.83023	-4.11046	-4.8775	-3.85997	-4.65528	-3.90288	-4.44162	-4.44411	-4.20167
A930001C03Rik	-3.95035	-4.02159	-4.39914	-4.14772	-3.82261	-5.27683	-4.76184	-4.21778	-3.91233	-4.83023	-4.11046	-4.8775	-3.85997	-4.65528	-3.90288	-4.44162	-4.44411	-4.20167
A930003A15Rik	-3.95035	-4.02159	-4.39914	-4.14772	-3.82261	-5.27683	-4.76184	-4.21778	-3.91233	-4.83023	-4.11046	-4.8775	-3.85997	-4.65528	-3.90288	-4.44162	-4.44411	-4.20167
A930003O13Rik	-3.95035	-4.02159	-4.39914	-4.14772	-3.82261	-5.27683	-4.76184	-4.21778	-3.91233	-4.83023	-4.11046	-4.8775	-3.85997	-4.65528	-3.90288	-4.44162	-4.44411	-4.20167
A930004D18Rik	-3.95035	-4.02159	-4.39914	-4.14772	-3.82261	-5.27683	-4.76184	-4.21778	-3.91233	-4.83023	-4.11046	-4.8775	-3.85997	-4.65528	-3.90288	-4.44162	-4.44411	-4.20167
A930005H10Rik	6.20574	6.12434	-0.698701	-4.14772	0.0842765	2.96635	-4.76184	-4.21778	-2.32736	1.47355	-1.30311	-2.07014	-2.27501	-4.65528	5.38944	6.81636	-4.44411	0.656313
A930006I01Rik	-3.95035	-4.02159	-4.39914	-4.14772	-3.82261	-5.27683	-4.76184	-4.21778	-3.91233	-4.83023	-4.11046	1.83675	-3.85997	-4.65528	-3.90288	-4.44162	-4.44411	-4.20167
A930006K02Rik	3.22956	-4.02159	1.90464	-4.14772	-3.82261	0.215025	-4.76184	-4.21778	-3.91233	1.19214	-1.78853	-4.8775	-3.85997	3.29309	2.4009	0.843783	-4.44411	-4.20167
A930007I19Rik	-3.95035	-4.02159	-4.39914	-4.14772	-3.82261	-1.0289	-4.76184	-4.21778	-3.91233	-3.24527	-4.11046	-4.8775	-3.85997	-4.65528	1.30657	-4.44162	-4.44411	-4.20167
A930009A15Rik	-3.95035	-4.02159	-4.39914	-4.14772	-3.82261	-5.27683	-4.76184	-4.21778	-3.91233	-4.83023	-4.11046	-4.8775	-3.85997	-4.65528	-3.90288	-4.44162	-4.44411	-4.20167
A930011G23Rik	-3.95035	-4.02159	-4.39914	-4.14772	-3.82261	-5.27683	-4.76184	-4.21778	-3.91233	-4.83023	-4.11046	-4.8775	-3.85997	-4.65528	-3.90288	-4.44162	-4.44411	-4.20167
A930011O12Rik	-3.95035	-4.02159	-4.39914	-4.14772	-3.82261	-0.884511	-4.76184	-4.21778	-3.91233	-4.83023	-4.11046	-4.8775	-3.85997	-4.65528	0.184584	-4.44162	-2.85915	-4.20167
A930012L18Rik	-3.95035	-4.02159	-4.39914	-4.14772	-3.82261	-5.27683	-4.76184	-4.21778	-3.91233	-4.83023	-4.11046	-4.8775	-3.85997	-4.65528	-3.90288	-4.44162	-4.44411	-1.87974
A930013F10Rik	-3.95035	4.96425	-4.39914	2.56652	-1.50069	3.28923	-4.76184	0.736421	3.78116	3.04628	-0.410022	3.85382	-0.400539	2.60211	1.65171	5.55132	-1.27418	3.43496
A930015D03Rik	-3.95035	-4.02159	-4.39914	-4.14772	-3.82261	-5.27683	-4.76184	-4.21778	-3.91233	-0.0753452	-4.11046	-0.629569	-3.85997	-4.65528	-3.90288	-4.44162	-4.44411	-4.20167
A930016O22Rik	-3.95035	-4.02159	-4.39914	-4.14772	-3.82261	-5.27683	-4.76184	-4.21778	-3.91233	-4.83023	-4.11046	-4.8775	-3.85997	-4.65528	-3.90288	-4.44162	-4.44411	-4.20167
A930017M01Rik	-3.95035	-4.02159	-4.39914	-4.14772	-3.82261	-5.27683	-4.76184	-4.21778	-3.91233	-4.83023	-4.11046	-4.8775	-3.85997	-4.65528	-3.90288	-4.44162	-4.44411	-4.20167
A930018P22Rik	-3.95035	-4.02159	-4.39914	-4.14772	-3.82261	-5.27683	-4.76184	-4.21778	-3.91233	-4.83023	-4.11046	-4.8775	-3.85997	-4.65528	-3.90288	-4.44162	-4.44411	-4.20167
A930019D19Rik	-3.95035	-4.02159	-4.39914	-4.14772	-3.82261	-5.27683	-4.76184	-4.21778	-3.91233	-4.83023	-4.11046	-4.8775	-3.85997	-4.65528	-3.90288	-4.44162	-4.44411	-4.20167
A930024E05Rik	-0.780423	1.40467	-2.81418	-4.14772	6.93644	3.88556	4.27982	4.39325	-3.91233	4.32711	5.50609	3.98978	1.97292	2.98134	-0.443448	0.0819432	2.99052	3.11122
A930041C12Rik	-3.95035	-4.02159	-4.39914	-4.14772	-3.82261	-5.27683	-4.76184	-4.21778	-3.91233	-3.24527	-4.11046	-2.07014	-3.85997	-0.95484	-3.90288	-4.44162	-4.44411	-4.20167
AA387883	-3.95035	-4.02159	-4.39914	-4.14772	-3.82261	-5.27683	-4.76184	-4.21778	-3.91233	-4.83023	-4.11046	-4.8775	-3.85997	-4.65528	-3.90288	-4.44162	-4.44411	-4.20167
AA388235	-3.95035	-4.02159	-4.39914	-4.14772	-3.82261	-5.27683	-4.76184	-4.21778	-3.91233	3.99313	-4.11046	-4.8775	-3.85997	-4.65528	-3.90288	-4.44162	-2.85915	-4.20167
AA413626	-3.95035	-4.02159	-4.39914	1.34413	-3.82261	-5.27683	-4.76184	-4.21778	5.68573	-4.83023	-0.65103	-4.8775	-3.85997	2.3334	-3.90288	-4.44162	-4.44411	-4.20167
AA414768	-3.95035	-4.02159	-4.39914	-4.14772	-3.82261	2.87799	-4.76184	-4.21778	-3.91233	-4.83023	-2.5255	-4.8775	-3.85997	-4.65528	-3.90288	-4.44162	-4.44411	-4.20167
AA415398	-3.95035	-4.02159	-2.07721	-4.14772	1.90531	3.44769	-3.17688	-2.63281	-3.91233	-4.83023	-4.11046	3.76275	-3.85997	-4.65528	-2.31792	5.50236	0.310779	-4.20167
AA465934	0.441969	-1.21424	0.810313	2.99183	-2.23765	-0.322632	-0.0069533	-1.04785	-3.91233	-2.5083	-4.11046	0.548768	0.99801	-0.131718	-3.90288	0.915933	-4.44411	-4.20167
AA467197	-3.95035	-4.02159	-4.39914	-4.14772	-3.82261	-5.27683	-4.76184	-4.21778	-3.91233	-4.83023	-4.11046	-4.8775	-3.85997	-4.65528	-3.90288	-4.44162	-4.44411	-4.20167
AA474331	4.6899	-4.02159	-4.39914	0.71026	-3.82261	-2.1069	3.37259	-4.21778	-3.91233	3.64144	-4.11046	-4.8775	-3.85997	-4.65528	-3.90288	-4.44162	-4.44411	-4.20167
AA536875	-3.95035	-4.02159	-4.39914	-4.14772	-3.82261	-5.27683	-4.76184	-4.21778	-3.91233	-4.83023	-4.11046	-4.8775	-3.85997	-4.65528	-3.90288	-4.44162	-4.44411	-4.20167
AA543186	-3.95035	-4.02159	-4.39914	-4.14772	-3.82261	-2.1069	-4.76184	0.537112	-3.91233	-4.83023	-4.11046	-4.8775	-3.85997	-4.65528	-3.90288	-4.44162	-4.44411	-4.20167
AA543401	-3.95035	-4.02159	-4.39914	-4.14772	-3.82261	-5.27683	-4.76184	-4.21778	-3.91233	-4.83023	-4.11046	-4.8775	-3.85997	-4.65528	-3.90288	-4.44162	-4.44411	-4.20167
AA545190	-3.95035	-4.02159	-4.39914	-4.14772	-3.82261	-5.27683	-4.76184	-4.21778	-3.91233	-4.83023	-4.11046	-4.8775	-3.85997	-4.65528	-3.90288	-4.44162	-4.44411	-4.20167
AA619741	-3.95035	-4.02159	-4.39914	-4.14772	-3.82261	-5.27683	-4.76184	-4.21778	-3.91233	-4.83023	-4.11046	-4.8775	-3.85997	-4.65528	-3.90288	-4.44162	-4.44411	-4.20167
AA792892	-3.95035	-4.02159	-4.39914	-4.14772	-3.82261	-5.27683	-4.76184	-4.21778	-3.91233	-4.83023	-4.11046	-4.8775	-3.85997	-4.65528	-3.90288	-4.44162	-4.44411	-4.20167
AA986860	4.67536	-4.02159	-4.39914	-2.56276	1.30667	-5.27683	3.78891	3.60877	-1.5904	-4.83023	-4.11046	0.0766998	-3.85997	3.99936	-3.90288	-4.44162	-4.44411	-4.20167
AA987161	4.08857	7.65015	4.55051	6.70236	4.9087	5.43255	5.83435	3.14715	5.5336	4.99294	4.86968	5.10632	6.22696	5.3812	4.40737	6.03422	6.81346	4.55362
Aaas	0.907633	4.07116	2.20077	6.3729	-3.82261	1.56866	-4.76184	7.56235	3.16449	2.66961	2.26458	4.17507	3.12871	3.23346	1.87848	2.09754	-2.12218	3.95315
Aacs	-3.95035	-4.02159	-4.39914	-4.14772	-0.652689	0.653909	-4.76184	-4.21778	-3.91233	0.784477	-4.11046	1.00515	3.2999	0.554174	-3.90288	-4.44162	-4.44411	-4.20167
Aadac	-3.95035	-4.02159	-4.39914	-4.14772	-3.82261	-5.27683	-4.76184	-4.21778	-3.91233	-4.83023	-4.11046	-4.8775	-3.85997	-4.65528	-3.90288	-4.44162	-4.44411	-4.20167
Aadacl2	-3.95035	-4.02159	-4.39914	-4.14772	-3.82261	-5.27683	-4.76184	-4.21778	-3.91233	-4.83023	-4.11046	-4.8775	-3.85997	-4.65528	-3.90288	-4.44162	-4.44411	-4.20167
Aadacl3	-3.95035	-4.02159	-4.39914	-4.14772	-3.82261	-5.27683	-4.76184	-4.21778	-3.91233	-4.83023	-4.11046	-4.8775	-3.85997	-4.65528	-3.90288	-4.44162	-4.44411	-4.20167
Aadat	-3.95035	-4.02159	-4.39914	-4.14772	-3.82261	-5.27683	-4.76184	-4.21778	-3.91233	-4.83023	-4.11046	-4.8775	-3.85997	-4.65528	-3.90288	-4.44162	-4.44411	-4.20167
Aaed1	2.70786	-4.02159	-2.07721	3.42971	2.80674	3.34156	-1.95449	4.0254	2.80192	2.13555	-0.940537	0.480055	5.32242	-0.567817	-3.90288	2.42875	-4.44411	-0.294777
Aagab	2.42469	7.04113	7.21603	5.59543	3.92558	5.4722	4.54422	6.77304	3.61906	5.86238	4.98494	5.31109	6.47654	5.61968	7.11044	6.46452	6.99935	7.04804
Aak1	6.16209	10.0126	7.84135	7.07688	7.30989	7.43075	8.67448	7.90473	8.07955	8.22217	6.35612	7.09009	5.80714	7.41652	7.28262	7.75221	7.358	8.58807
Aamdc	-3.95035	-4.02159	2.25907	1.9608	-3.82261	2.59969	-4.76184	4.75089	-3.91233	0.123964	-4.11046	0.677092	-3.85997	3.06582	-3.90288	3.86672	-4.44411	-4.20167
Aamp	6.71054	3.76631	5.85471	2.84096	4.77358	3.66275	2.29344	-0.758344	1.13207	5.07515	7.35255	4.57577	7.8547	1.71976	6.04403	5.67602	3.36967	6.70447
Aanat	-3.95035	-4.02159	-4.39914	-4.14772	-3.82261	-5.27683	-4.76184	-4.21778	-3.91233	-4.83023	-4.11046	-4.8775	-3.85997	-4.65528	-3.90288	-4.44162	-4.44411	-4.20167
Aar2	3.61189	-4.02159	1.21557	5.30143	4.52168	3.75384	-0.513913	0.911507	7.28428	4.47126	0.281856	4.09117	2.1624	4.21816	-2.31792	4.01371	2.7358	4.27811
Aard	-3.95035	-4.02159	-4.39914	-4.14772	-3.82261	-5.27683	-4.76184	-4.21778	-3.91233	-4.83023	-4.11046	-4.8775	-3.85997	-4.65528	-3.90288	-4.44162	-4.44411	-4.20167
Aars	5.87461	4.92385	3.94516	5.17646	5.73389	6.1085	6.35125	5.32332	7.71566	3.70504	1.01882	6.44837	5.85256	5.24408	5.84364	6.12729	7.83173	4.90947
Aars2	-3.95035	-4.02159	-4.39914	-4.14772	3.70877	2.62404	0.0961402	-4.21778	-3.91233	4.14418	-4.11046	-0.353935	-3.85997	1.12608	1.45467	3.0422	-4.44411	-0.114205
Aarsd1	2.02693	5.56525	0.124421	-4.14772	-3.82261	4.33604	3.52818	6.8557	1.44523	1.93795	4.61405	1.91692	-3.85997	0.554174	-3.90288	-4.44162	3.19252	0.321894
Aasdh	-2.36539	7.97453	1.5316	2.79479	-3.82261	2.23887	5.96011	6.31068	0.611236	2.24658	3.16566	1.72242	-0.159531	-1.19585	2.75533	7.13534	-4.44411	-1.39431
Aasdhppt	6.83183	4.23107	-0.151213	1.13768	0.0842765	4.00626	4.12386	5.65413	2.06495	2.91796	-0.203571	2.13373	2.90821	3.91837	5.57488	4.57797	0.413873	0.321894
Aass	-3.95035	-4.02159	-4.39914	-4.14772	-3.82261	-5.27683	-4.76184	-4.21778	-3.91233	-4.83023	-4.11046	-4.8775	-3.85997	-4.65528	-3.90288	-4.44162	-4.44411	-4.20167
Aatf	6.37045	-2.43663	0.355747	4.4633	3.23267	5.65021	4.55331	0.42608	6.51499	4.36206	2.07936	5.34288	7.11945	2.48427	4.20041	4.98255	7.78981	5.21407
Aatk	3.91384	-4.02159	1.66695	-2.56276	-3.82261	1.29303	-0.674378	-4.21778	-3.91233	-2.5083	-4.11046	-1.70757	1.34948	-0.95484	7.29372	-4.44162	-1.27418	-4.20167
AB041803	1.09405	-1.69967	3.17829	-1.82579	4.96855	1.54335	6.10002	3.05835	3.98854	1.50962	-0.65103	1.14487	0.783886	0.389114	4.69331	2.87126	-4.44411	1.86442
AB124611	-3.95035	-4.02159	-4.39914	-4.14772	-3.82261	-0.322632	1.77732	-4.21778	-3.91233	2.55347	-1.30311	-4.8775	-3.85997	0.630122	1.71183	4.54422	-4.44411	-4.20167
Abat	-3.95035	-4.02159	-4.39914	-4.14772	-3.82261	-5.27683	-4.76184	-4.21778	-3.91233	-4.83023	-4.11046	-3.29253	-3.85997	-4.65528	-3.90288	-4.44162	-4.44411	-4.20167
Abca1	9.45865	10.5668	8.33832	7.75503	9.20754	8.69175	9.61815	8.84579	10.0729	8.88283	9.21302	9.12312	9.75554	9.17335	9.26093	10.2732	9.33756	9.28404
Abca16	-3.95035	-4.02159	-4.39914	-4.14772	-3.82261	-5.27683	-4.76184	-4.21778	-3.91233	-4.83023	-4.11046	-4.8775	-3.85997	-4.65528	-3.90288	-4.44162	-4.44411	-4.20167
Abca17	-3.95035	-4.02159	-4.39914	-4.14772	1.60365	0.989959	-4.76184	-4.21778	-3.91233	-4.83023	-4.11046	-4.8775	-3.85997	-4.65528	-3.90288	-4.44162	-0.537218	-1.03174
Abca2	4.80788	6.66753	5.09471	4.27434	6.11843	6.43441	5.77441	4.15291	3.07636	6.13771	4.67417	5.53083	7.01116	3.06582	3.76246	7.06072	7.31036	3.92245
Abca3	6.08032	3.81761	6.94587	3.94504	4.84627	5.89486	6.64596	1.7595	5.70422	5.03825	1.86682	4.45633	6.40967	5.61807	3.15088	5.69199	1.89574	1.07929
Abca5	-3.95035	-4.02159	-4.39914	-4.14772	-3.82261	-5.27683	-4.76184	-4.21778	-3.91233	-4.83023	-4.11046	-4.8775	-3.85997	-4.65528	-3.90288	-1.63426	-4.44411	-4.20167
Abca6	-3.95035	-4.02159	-4.39914	-4.14772	-3.82261	-3.69187	-4.76184	-4.21778	-3.91233	-4.83023	-1.30311	-1.41806	-3.85997	-4.65528	-3.90288	-4.44162	-4.44411	-2.61671
Abca7	7.72429	3.01183	6.40095	4.67565	5.8122	4.85631	5.8919	-1.04785	4.49282	4.03705	4.69367	4.87906	5.94899	2.58312	1.14151	5.76662	5.13897	7.42996
Abca8a	-1.62842	-4.02159	-4.39914	-4.14772	2.15467	-5.27683	-4.76184	-4.21778	-3.91233	-2.02288	-4.11046	-4.8775	-3.85997	-4.65528	-3.90288	-4.44162	-4.44411	-4.20167
Abca8b	-3.95035	-4.02159	-4.39914	-4.14772	-3.82261	-5.27683	-4.76184	-4.21778	-3.91233	-4.83023	-4.11046	-4.8775	-3.85997	-4.65528	-3.90288	-4.44162	-4.44411	-4.20167
Abca9	10.0227	9.67548	9.84083	9.77142	9.01442	9.38144	9.47619	9.57451	9.74041	9.33538	10.1077	9.63382	9.744	9.35638	10.3319	9.7746	9.93629	10.2729
Abcb10	6.4061	4.82703	4.38549	4.10494	-2.23765	3.99697	2.8004	3.60877	-3.91233	5.06307	4.97435	2.13373	3.62385	3.11951	3.17394	2.3528	5.86537	3.18204
Abcb11	-3.95035	-4.02159	-4.39914	-4.14772	-3.82261	-5.27683	-4.76184	-4.21778	-3.91233	-4.83023	-4.11046	-4.8775	-3.85997	-4.65528	-3.90288	-4.44162	-4.44411	-4.20167
Abcb1a	-3.95035	-4.02159	-4.39914	-4.14772	-3.82261	-5.27683	-4.76184	-4.21778	-3.91233	-4.83023	-4.11046	-4.8775	-3.85997	-4.65528	-3.90288	-2.85666	-4.44411	-4.20167
Abcb1b	6.0255	0.733294	1.70938	2.11907	3.5083	4.51921	5.09147	5.75807	5.8542	4.09755	4.21597	3.88073	-2.27501	4.8545	-2.31792	5.98779	1.48663	4.91468
Abcb4	-1.62842	4.14331	3.99746	3.90213	3.52611	4.36883	2.87478	7.20796	5.46488	4.21689	4.75682	4.9055	4.21149	2.42154	-0.202439	1.58075	5.29567	2.5398
Abcb5	-3.95035	-4.02159	-4.39914	-4.14772	-3.82261	-5.27683	-4.76184	-4.21778	-3.91233	-4.83023	-4.11046	-4.8775	-3.85997	-4.65528	-3.90288	-4.44162	-4.44411	-4.20167
Abcb6	5.75874	1.65083	-4.39914	5.12141	-0.652689	1.43742	2.33619	-2.63281	-3.91233	3.78079	4.40129	4.58807	1.42543	-4.65528	4.04549	-2.85666	-4.44411	1.47076
Abcb7	5.01255	2.31826	4.37894	5.4725	4.87435	5.57414	4.64543	3.09511	6.71794	5.15987	5.08183	6.10906	1.86795	5.07774	5.4258	7.10961	5.34216	4.68403
Abcb8	-1.14299	-2.43663	-2.81418	3.35212	2.28591	2.43053	2.91764	4.63709	-1.5904	2.08863	0.4131	2.57371	10.6133	3.50963	2.02786	4.59455	7.1857	0.656313
Abcb9	-3.95035	1.70633	-4.39914	-4.14772	-3.82261	0.700452	-4.76184	-4.21778	-3.91233	4.15561	-4.11046	-4.8775	-3.85997	-3.07032	-3.90288	0.602775	-4.44411	-1.03174
Abcc1	3.8112	7.05054	5.19518	7.14402	2.4062	4.85117	7.23428	4.47222	3.78116	4.99473	3.70332	4.13093	2.20612	5.8945	0.740977	5.0956	2.88681	6.24231
Abcc10	-3.95035	-4.02159	5.48197	2.42213	-3.82261	2.98527	3.92816	3.79903	-1.5904	2.95767	3.40524	4.63228	-1.53804	1.36709	3.6285	2.65641	-2.12218	5.28818
Abcc12	-3.95035	-4.02159	-4.39914	-4.14772	-3.82261	-5.27683	-4.76184	-4.21778	-3.91233	-4.83023	-4.11046	-4.8775	-3.85997	-4.65528	-3.90288	-4.44162	-4.44411	-4.20167
Abcc3	9.13728	9.17301	9.51758	8.21504	8.95649	8.00814	8.75694	7.99015	8.95089	7.6057	8.69911	8.21905	8.00538	8.96253	6.20434	7.77785	10.8981	8.8333
Abcc4	-2.36539	2.63662	4.89778	-4.14772	-2.23765	1.40967	-3.17688	-1.89585	-2.32736	2.7472	3.18416	2.48883	0.0469199	3.29309	2.99194	4.45623	3.16322	3.91207
Abcc5	5.97891	7.12752	8.24989	7.54881	6.52501	6.22052	6.70322	6.78293	8.44825	6.99671	6.10507	7.25853	5.6056	7.82778	7.79539	7.47985	7.77112	7.55113
Abcc6	-3.95035	-4.02159	-4.39914	-4.14772	-3.82261	-5.27683	-4.76184	-4.21778	-3.91233	-4.83023	-4.11046	-4.8775	-3.85997	-4.65528	-3.90288	-4.44162	-4.44411	-4.20167
Abcc8	-3.95035	-4.02159	-4.39914	-4.14772	-3.82261	-5.27683	-4.76184	-4.21778	-3.91233	-4.83023	-4.11046	-4.8775	-3.85997	-4.65528	-3.90288	-4.44162	-4.44411	-4.20167
Abcc9	-3.95035	-4.02159	-4.39914	-4.14772	-3.82261	-1.36994	-4.76184	-4.21778	-3.91233	-4.83023	-4.11046	-3.29253	-3.85997	4.20581	-3.90288	-4.44162	-4.44411	-4.20167
Abcd1	7.63883	7.28959	6.99907	5.60215	9.19053	5.82973	7.51748	8.40862	7.62246	6.61426	6.07565	6.40501	7.11802	5.72085	7.81008	6.71257	7.70532	6.8475
Abcd2	5.93382	6.06454	5.87349	6.55185	7.96896	6.31142	7.14543	6.45906	3.7243	6.62561	7.50102	6.40964	7.40506	5.64049	6.95588	6.42952	6.70754	4.11574
Abcd3	6.91461	6.5224	5.22839	5.84522	6.90955	5.87862	4.55331	5.1243	5.84756	7.03975	6.70091	5.22185	6.40564	6.48107	4.12503	6.47948	4.12954	6.20666
Abcd4	-3.95035	6.81682	5.15737	3.70403	3.43477	3.1867	-4.76184	2.81565	-3.91233	2.50068	-4.11046	2.36091	-3.85997	2.86042	1.05132	-2.85666	1.74572	3.46367
Abce1	7.60759	6.15458	2.31511	7.2696	3.37706	5.44513	4.26883	6.40153	6.38803	6.1042	4.66762	4.47344	6.4033	3.66213	6.26077	5.75683	4.13709	4.0029
Abcf1	7.77289	7.58897	6.00281	5.50512	5.28329	5.94898	5.27296	3.03961	1.7601	5.52622	5.14457	5.62135	4.72123	4.25461	3.58094	4.80393	3.98634	7.20401
Abcf2	4.69711	1.90914	1.27328	0.375841	3.49027	1.09821	4.08051	2.70109	-3.91233	4.63125	2.57604	4.81075	7.60814	5.64964	5.87026	4.96565	1.78471	2.39825
Abcf3	2.07202	6.69179	5.70021	5.71801	4.51278	5.97643	4.28528	5.46697	5.22467	6.1775	7.10446	4.43765	2.85427	5.34613	-2.31792	3.19501	-0.196181	4.16028
Abcg1	6.57223	9.00233	8.11335	5.59543	6.32332	6.95229	6.61808	6.65336	6.31288	6.83821	6.04055	6.23429	6.29358	7.68206	8.30322	6.96724	9.77725	8.36272
Abcg2	2.67901	4.46625	4.46814	0.896673	-2.23765	4.62555	6.67122	2.9421	4.33085	4.84396	6.27216	5.01277	-2.27501	4.31913	4.42355	4.93559	3.14835	5.77418
Abcg3	1.72208	-4.02159	-0.151213	-4.14772	4.68121	2.1578	4.84734	-1.04785	-3.91233	3.07063	-4.11046	2.11119	2.02267	4.10959	-2.31792	-2.11969	-2.85915	-4.20167
Abcg4	-3.95035	-4.02159	-4.39914	-4.14772	-3.82261	0.789261	-4.76184	-4.21778	-3.91233	-4.83023	-4.11046	-4.8775	-3.85997	-4.65528	-3.90288	-4.44162	-4.44411	-4.20167
Abcg5	-3.95035	-4.02159	-4.39914	-4.14772	-3.82261	-5.27683	-4.76184	-4.21778	-3.91233	-4.83023	-4.11046	-4.8775	-3.85997	-4.65528	-3.90288	-4.44162	-4.44411	-4.20167
Abcg8	-3.95035	-4.02159	-4.39914	-4.14772	-3.82261	-2.46947	-4.76184	-4.21778	-3.91233	0.66162	-4.11046	-4.8775	-3.85997	-4.65528	-3.90288	-4.44162	-4.44411	-4.20167
Abhd1	2.245	-1.69967	4.70985	-4.14772	-3.82261	2.41791	-4.76184	-1.82271	-0.824863	0.619989	3.39368	2.6068	3.28856	-4.65528	-3.90288	-1.60569	-4.44411	-4.20167
Abhd10	-3.95035	-0.851669	7.44124	2.59375	-3.82261	2.20699	-0.0069533	-1.89585	-1.5904	2.82082	0.843735	2.60632	3.41615	0.95943	4.93317	-2.85666	1.70564	4.19494
Abhd11	3.56535	-2.43663	0.458841	7.88122	5.57613	2.31563	-4.76184	0.537112	5.96266	-1.12979	5.16333	3.07087	-1.53804	3.11951	5.48729	-4.44162	0.685175	-2.61671
Abhd11os	-3.95035	-4.02159	-4.39914	-4.14772	-3.82261	-5.27683	-4.76184	-4.21778	-3.91233	-4.83023	-4.11046	-4.8775	-3.85997	-4.65528	-3.90288	-4.44162	-4.44411	-4.20167
Abhd12	8.96273	9.64474	8.19028	9.40194	8.68295	8.70358	8.91047	8.71425	8.81623	9.27166	9.10006	8.70617	9.30163	8.49748	10.145	9.4348	9.32583	8.72147
Abhd12b	-3.95035	-4.02159	-4.39914	-4.14772	-3.82261	-5.27683	-4.76184	-4.21778	-3.91233	-4.83023	-4.11046	-4.8775	-3.85997	-4.65528	-3.90288	-4.44162	-4.44411	-4.20167
Abhd13	2.42469	5.40257	5.61906	5.68675	5.11697	6.04792	4.7078	2.41158	4.33085	5.63227	7.21428	5.45901	9.31854	5.53578	4.60887	7.71731	6.60233	5.81653
Abhd14a	-3.95035	-4.02159	-4.39914	-4.14772	-3.82261	0.912997	-2.43991	1.97205	-2.32736	4.86847	5.23605	3.07087	0.387957	-4.65528	-3.90288	-4.44162	-2.12218	4.69618
Abhd14b	2.73615	3.60046	1.09271	4.0272	-2.23765	4.62253	-1.59192	4.10865	5.55324	3.80276	5.04689	3.43992	3.95381	4.25461	-1.09552	3.0422	4.34705	4.5632
Abhd15	7.33448	5.67015	5.33387	3.55964	6.76891	6.84373	6.18141	6.08715	7.45673	6.16483	7.37486	6.90509	6.34093	7.28393	7.73601	4.83683	6.48145	6.33264
Abhd16a	-2.36539	2.96709	-0.939709	3.25316	7.54207	4.6195	3.94206	2.35208	6.65278	4.66362	-2.5255	5.28111	4.0409	2.05897	2.54006	-2.11969	0.913444	-2.61671
Abhd16b	-3.95035	-4.02159	-4.39914	-4.14772	-3.82261	-5.27683	-4.76184	-4.21778	-3.91233	-4.83023	-4.11046	-4.8775	-3.85997	-4.65528	-3.90288	-4.44162	-4.44411	-4.20167
Abhd17a	2.73615	6.68144	2.44635	6.19101	-0.122174	2.53695	0.664424	-4.21778	-2.32736	3.20869	2.96635	4.20199	-2.27501	3.73274	-3.90288	5.75683	-0.356646	-0.114205
Abhd17b	4.6233	6.01321	2.07659	4.42593	4.51278	3.62705	3.19816	2.77091	1.64226	3.26252	4.12316	3.78428	4.05292	4.01361	-2.31792	3.8484	5.39352	0.442189
Abhd17c	3.30704	6.08301	4.75314	7.33357	6.8347	5.86974	4.73201	4.27006	5.56138	5.10198	6.39237	6.75686	6.93363	8.32254	4.90125	5.22904	0.0794536	6.78204
Abhd2	-0.780423	5.49608	5.4066	4.6105	6.71363	4.75522	3.93513	2.96213	0.335602	3.65761	0.843735	4.3728	3.68692	2.23954	2.69703	-0.193691	-4.44411	0.55322
Abhd3	-3.95035	-4.02159	-4.39914	-4.14772	-3.82261	1.71186	0.792748	-4.21778	-0.452894	0.214161	-4.11046	4.10264	-3.85997	-4.65528	1.58897	3.64053	6.18616	-4.20167
Abhd4	4.45479	5.0364	4.29086	4.76816	8.28754	5.47388	4.17185	1.20849	0.335602	4.2809	4.89797	5.25821	7.84004	4.55173	6.76334	4.61095	5.9832	-0.742236
Abhd5	4.23453	5.50001	5.97915	1.68517	1.90531	4.69328	2.51428	2.57664	-1.5904	4.76782	2.87822	4.80374	6.97687	4.84257	5.04256	2.06618	3.44463	4.84546
Abhd6	5.55943	4.04987	3.78573	6.89872	7.16252	5.30343	5.9481	5.55536	6.48106	4.98835	5.98362	5.19262	4.85771	6.824	3.17394	5.20043	5.67094	7.05984
Abhd8	-3.95035	4.98684	-4.39914	5.61217	-2.23765	3.08512	3.84179	-4.21778	-3.91233	-1.3708	3.37335	1.23103	-3.85997	2.42154	-3.90288	-4.44162	-4.44411	-2.61671
Abi1	7.21393	3.49411	6.39609	6.65883	5.68316	5.82045	6.89314	6.54792	3.566	6.93253	7.70556	6.22683	6.26027	3.7241	6.2708	5.11489	7.06814	5.23504
Abi2	4.45479	1.0228	1.57814	4.52116	6.61929	5.23986	4.16	6.61115	6.25384	3.87367	6.18989	5.90304	2.98552	4.12936	6.04403	2.90711	5.61524	3.36057
Abi3	6.62235	7.94094	8.79084	8.32014	7.49875	8.21164	8.23304	8.5014	8.68735	8.17346	7.88	8.37856	9.42644	8.34525	9.19565	8.98347	7.82765	8.68078
Abi3bp	-3.95035	-4.02159	-4.39914	1.46699	-3.82261	-0.0673747	-4.76184	-4.21778	-3.91233	-1.12979	-4.11046	-4.8775	-3.85997	-4.65528	-3.90288	-4.44162	-4.44411	-4.20167
Abl1	7.76861	8.09052	8.24719	7.74292	7.68864	7.112	5.88292	6.39048	8.74834	7.29033	7.61448	7.3286	7.35374	6.82096	7.2551	6.75744	7.81003	7.96041
Abl2	3.97446	5.67363	6.02817	6.23706	4.89506	6.95229	7.51806	7.46653	0.73153	4.69137	8.52956	5.60934	0.99801	8.0948	6.72009	7.37976	6.60642	7.91695
Ablim1	-0.780423	0.836387	-2.07721	-4.14772	6.06461	2.84729	1.42798	5.9307	-0.452894	4.61064	3.77828	2.9234	-1.53804	4.91268	5.86365	-2.85666	5.77142	6.03075
Ablim2	-3.95035	-2.43663	-4.39914	-4.14772	-3.82261	-5.27683	-4.76184	-4.21778	-3.91233	-4.83023	-4.11046	-4.8775	-3.85997	-4.65528	5.19252	-4.44162	-4.44411	-4.20167
Ablim3	-3.95035	-4.02159	-4.39914	-4.14772	-3.82261	-5.27683	-4.76184	-4.21778	-3.91233	-4.83023	-4.11046	-4.8775	-3.85997	-4.65528	-3.90288	-4.44162	-4.44411	-4.20167
Abo	-3.95035	-4.02159	-4.39914	-4.14772	-3.82261	-5.27683	-4.76184	-4.21778	-3.91233	-4.83023	-4.11046	-4.8775	-3.85997	-4.65528	-3.90288	-4.44162	-4.44411	-4.20167
Abr	8.15785	2.54826	8.11877	6.99502	6.01816	6.91639	7.3286	7.67211	7.0996	6.13339	4.37738	6.50134	5.57674	7.29126	8.41538	7.47762	7.76199	5.80816
Abra	-3.95035	-4.02159	-4.39914	-4.14772	-3.82261	-0.884511	-3.17688	3.1831	-3.91233	-4.83023	-4.11046	-0.970606	-3.85997	-4.65528	-3.90288	-4.44162	-4.44411	0.0462599
Abracl	-2.36539	-0.562162	3.22291	-0.0602586	1.13158	3.55922	5.42179	4.3175	2.53062	3.46898	3.74129	3.05914	1.34948	4.85845	0.740977	3.41013	0.841294	2.30613
Abt1	-3.95035	7.36049	3.98024	-4.14772	-2.23765	2.97584	-0.85495	4.94462	4.38688	-0.186377	-1.30311	3.07087	-3.85997	5.42554	-3.90288	-1.63426	-2.85915	5.51429
Abtb1	3.99802	-0.851669	8.79146	7.28012	5.4651	5.09277	6.27365	2.9421	3.57149	4.75285	5.59171	5.97971	2.76939	3.94835	2.11949	5.40857	1.57826	7.79939
Abtb2	-3.95035	-4.02159	-4.39914	-4.14772	-3.82261	-5.27683	-4.76184	-4.21778	-3.91233	-4.83023	-4.11046	-4.8775	-3.85997	-4.65528	-3.90288	-4.44162	-4.44411	-4.20167
Acaa1a	2.07202	6.92305	5.27858	3.1469	4.83916	3.99697	7.15739	5.62586	3.55528	4.2001	4.65441	5.41335	4.91152	2.4	5.20303	5.41431	0.685175	4.72611
Acaa1b	-3.95035	-2.38933	-4.39914	-4.14772	-3.82261	-5.27683	-4.76184	-2.54875	-3.91233	-3.18869	-4.11046	-2.47696	-3.85997	-4.65528	-3.90288	-2.71044	-4.44411	-4.20167
Acaa2	-1.62842	6.87701	0.555056	-4.14772	-2.23765	3.3342	-3.17688	2.19162	-0.211886	2.22505	5.10143	3.78428	-0.690046	3.13262	-3.90288	5.15643	4.14461	-2.61671
Acaca	2.07202	-4.02159	1.38222	-4.14772	4.13739	2.8981	-2.43991	3.00139	7.08132	-0.0753452	5.27108	3.54457	1.09423	4.92404	4.38714	1.44102	-4.44411	-4.20167
Acad10	-3.95035	-2.43663	-2.81418	-4.14772	0.264849	2.05409	-4.76184	1.7595	-1.10497	1.39859	4.00328	2.88405	-3.85997	2.62084	-3.90288	-4.44162	-4.44411	-4.20167
Acad11	-2.36539	4.45819	4.92953	2.59375	-3.82261	2.69472	4.71186	-4.21778	2.95804	2.22505	4.11354	3.1832	-2.27501	5.20736	-3.90288	-0.534728	1.04774	4.26186
Acad12	-3.95035	-4.02159	-4.39914	-0.977796	-3.82261	-2.46947	1.92466	-4.21778	-3.91233	-4.83023	-2.5255	-4.8775	-3.85997	-4.65528	-3.90288	-4.44162	-4.44411	1.08373
Acad8	7.64351	6.65172	-4.39914	0.496135	-3.82261	4.39736	2.45733	4.98924	6.4353	2.70115	5.61916	4.35372	-1.05262	4.51214	2.66698	-2.11969	3.10279	-4.20167
Acad9	-2.36539	7.01252	-0.00682305	-4.14772	1.84981	4.733	5.17627	2.04901	-1.5904	2.40817	3.76606	5.74547	-2.27501	-4.65528	-3.90288	4.46827	3.88232	5.91857
Acadl	2.35343	-2.43663	1.62323	3.74102	5.46971	3.94958	6.69194	-0.517336	0.842562	3.88057	8.0604	2.41712	5.80003	-0.95484	5.7063	3.12062	3.4807	-0.114205
Acadm	7.85096	6.03233	4.08064	7.18487	4.84627	6.05465	3.94206	5.78081	5.56138	5.95522	5.82765	4.59621	3.77665	5.26209	2.20565	4.20584	-4.44411	5.42951
Acads	2.58881	2.16823	-1.22922	4.63691	1.13158	1.98056	0.447613	3.00139	2.01841	2.86325	3.08921	2.48883	-0.159531	3.24559	-3.90288	-4.44162	2.54458	4.62806
Acadsb	7.66298	6.7224	3.95401	3.44474	6.4146	5.25747	5.27845	5.87894	4.2626	5.82709	4.17031	5.11827	6.2706	5.85152	5.08296	3.67212	7.32532	1.77561
Acadvl	0.441969	3.61503	4.27682	3.91297	4.34229	4.6465	-0.369523	4.97452	4.53476	5.40458	4.27756	4.15868	5.81422	4.92026	5.93475	3.98045	2.61117	-1.87974
Acap1	-3.95035	-4.02159	-4.39914	-4.14772	-3.82261	-5.27683	-4.76184	-4.21778	-3.91233	-4.83023	-4.11046	-4.8775	-3.85997	-4.65528	-3.90288	-4.44162	-4.44411	-4.20167
Acap2	8.32199	8.76488	6.54411	6.45126	6.98555	7.44577	7.93968	7.60758	7.22659	7.52814	8.12466	7.41626	8.12124	6.20968	7.45852	7.08439	7.09844	8.08518
Acap3	-3.95035	6.47726	-4.39914	-2.56276	-3.82261	1.86272	3.57355	-2.63281	-3.91233	0.951127	-1.30311	4.30986	-3.85997	1.78766	-3.90288	-4.44162	-4.44411	-2.61671
Acat1	2.92002	6.53778	2.28736	6.64751	-1.01526	5.49384	3.8784	7.54834	2.62683	4.89257	6.6234	5.05472	5.99334	3.83256	5.4213	5.80512	3.51589	4.15148
Acat2	-3.95035	-4.02159	-4.39914	3.01215	-1.01526	3.63881	1.31369	-1.03508	-3.91233	3.84127	4.02396	0.350553	-3.85997	-2.02767	-3.90288	-4.44162	-4.44411	-2.5976
Acat3	-3.95035	-4.02159	-2.44308	-4.14772	-3.82261	-3.46947	-4.76184	5.31076	-3.91233	1.05192	-4.11046	-4.8775	-3.85997	-2.27123	-3.90288	-2.49302	-4.44411	3.23762
Acbd3	6.57027	5.78092	8.33874	3.92374	6.86826	5.37333	5.65284	6.07109	7.57903	6.08789	6.23272	6.23037	6.40095	6.65363	3.25699	2.37856	2.81328	8.60186
Acbd4	-3.95035	-4.02159	-4.39914	-4.14772	-3.82261	-2.9549	-4.76184	-4.21778	-3.91233	-0.923342	-4.11046	-4.8775	-2.27501	4.68679	-2.31792	-2.11969	-4.44411	-4.20167
Acbd5	-2.36539	6.58296	3.23748	5.58868	4.5654	5.93931	6.42984	3.99654	6.51289	5.21006	6.25695	5.90632	5.99645	3.38364	3.96131	5.61502	6.55237	4.40936
Acbd6	0.573214	5.71481	2.36904	-0.447282	4.36226	1.9993	4.60229	4.95465	-1.5904	5.10493	0.281856	3.97113	-3.85997	-2.33335	-3.90288	2.18774	2.32408	4.18635
Acbd7	-3.95035	-4.02159	-4.39914	-4.14772	-3.82261	-5.27683	-4.76184	-4.21778	-3.91233	-4.83023	-4.11046	-4.8775	-3.85997	-4.65528	-3.90288	-4.44162	-4.44411	-4.20167
Accs	4.51318	6.47326	7.19098	7.52691	7.43064	5.4417	5.95498	4.82388	7.84298	5.43304	6.74207	6.5175	7.69126	5.61034	7.12434	7.07753	6.97638	4.67792
Accsl	-3.95035	-4.02159	-4.39914	-4.14772	-3.82261	-5.27683	-4.76184	-4.21778	-3.91233	-4.83023	-4.11046	-4.8775	-3.85997	-4.65528	-3.90288	-4.44162	-4.44411	-4.20167
Acd	-3.95035	5.32048	0.244716	5.0835	4.06613	0.74554	2.94552	1.97205	-2.32736	1.19214	4.01366	3.43992	-0.159531	3.30472	-3.90288	5.88144	-4.44411	-4.20167
Ace	-3.95035	-4.02159	-4.39914	-4.14772	-3.82261	-5.27683	-4.76184	-4.21778	-3.91233	-4.83023	-4.11046	-4.8775	-3.85997	-4.65528	-3.90288	-4.44162	-4.44411	-4.20167
Ace2	-3.95035	-4.02159	-4.39914	-4.14772	-2.23765	-5.27683	-4.76184	-4.21778	-3.91233	-4.83023	-4.11046	-4.8775	-3.85997	-4.65528	-3.90288	-4.44162	-4.44411	-4.20167
Ace3	-3.95035	-4.02159	-4.39914	-4.14772	-3.82261	-5.27683	-4.76184	-4.21778	-3.91233	-4.83023	-4.11046	-4.8775	-3.85997	-4.65528	-3.90288	-4.44162	-4.44411	-4.20167
Acer1	-3.95035	-4.02159	-4.39914	-4.14772	-3.82261	-5.27683	-4.76184	-4.21778	-3.91233	-4.83023	-4.11046	-4.8775	-3.85997	-4.65528	-3.90288	-4.44162	-4.44411	-4.20167
Acer2	4.49674	-4.02159	-4.39914	-4.14772	-1.50069	-1.18937	-4.76184	-4.21778	-3.91233	-4.83023	-4.11046	-4.8775	-3.85997	-4.65528	-3.90288	-4.44162	-0.743669	-4.20167
Acer3	7.08651	5.11026	5.77952	5.66124	4.36226	5.74485	4.64543	5.57501	6.09189	5.53281	6.71847	5.76726	5.5933	5.28577	6.80879	5.82165	5.34543	5.62329
Ache	-2.36539	-4.02159	-2.81418	-1.82579	-1.01526	3.25065	0.367442	-0.517336	5.91898	4.33719	3.32417	4.23885	7.1892	1.6485	-3.90288	5.90822	4.74324	0.0462599
Acin1	7.84691	9.19045	5.66921	8.02939	7.46221	7.49204	6.59736	9.22193	8.54205	7.13797	5.10628	7.47454	7.00808	8.25177	10.0099	6.16406	5.66049	7.12595
Ackr1	-3.95035	-4.02159	-4.39914	-4.14772	-3.82261	-5.27683	-4.76184	-4.21778	-3.91233	-4.83023	-4.11046	-4.8775	-3.85997	-4.65528	-3.90288	-4.44162	-4.44411	-4.20167
Ackr2	-3.95035	-4.02159	-4.39914	-4.14772	-3.82261	-5.27683	-4.76184	-4.21778	-3.91233	-4.83023	-4.11046	-2.55557	-3.85997	-4.65528	-3.90288	-4.44162	-4.44411	1.57969
Ackr3	-3.95035	-4.02159	-4.39914	-4.14772	-3.82261	3.1867	-3.17688	-4.21778	-3.91233	1.73962	-4.11046	1.6303	-3.85997	-4.65528	-3.90288	-0.0493013	-4.44411	-4.20167
Ackr4	-3.95035	-4.02159	-4.39914	-4.14772	-3.82261	0.149437	0.595711	-4.21778	-3.91233	-4.83023	0.137466	2.32218	-3.85997	-4.65528	-3.90288	-4.44162	-4.44411	-4.20167
Acly	4.43767	3.50979	5.46039	4.96341	7.17668	5.45534	5.36357	4.87762	5.64801	7.87086	6.74985	6.98165	7.88444	5.42554	4.92049	5.6656	9.03099	4.19494
Acmsd	-3.95035	-4.02159	-4.39914	-4.14772	-3.82261	-5.27683	-4.76184	-4.21778	-2.32736	-4.83023	-4.11046	-4.8775	-3.85997	-4.65528	-3.90288	-4.44162	-4.44411	0.0462599
Acn9	-3.95035	-4.02159	-4.39914	-4.14772	-3.82261	-1.8174	-4.76184	1.61511	-3.91233	-4.83023	-2.5255	0.794929	-3.85997	3.46884	-3.90288	-4.44162	-4.44411	-4.20167
Acnat1	-3.95035	-4.02159	-4.39914	-4.14772	-3.82261	-5.27683	-4.76184	-4.21778	-3.91233	-4.83023	-4.11046	-4.8775	-3.85997	-4.65528	-3.90288	-4.44162	-4.44411	-4.20167
Acnat2	-3.95035	-4.02159	-4.39914	-4.14772	-3.82261	-5.27683	-4.76184	-4.21778	-3.91233	-4.83023	-4.11046	-4.8775	-3.85997	-4.65528	-3.90288	-4.44162	-4.44411	-4.20167
Aco1	5.78943	3.39626	3.75568	4.93176	0.569703	2.84729	1.01952	4.77375	-2.32736	4.25988	4.62763	1.49754	4.73622	3.37263	2.16321	5.77149	2.63271	4.71421
Aco2	3.10493	0.836387	6.52047	5.55791	6.08878	5.69687	3.95584	3.91665	5.22978	6.09384	5.8768	5.3283	6.82565	7.01405	7.9185	3.87579	5.37127	7.03494
Acot1	-3.95035	-4.02159	-4.39914	-4.14772	-3.82261	-5.27683	-4.76184	-4.21778	-3.91233	-4.83023	-4.11046	-4.8775	-3.85997	-4.65528	-3.90288	-4.44162	-4.44411	-4.20167
Acot10	-3.95035	-4.02159	-4.39914	-4.14772	-3.82261	-5.27683	-4.76184	-4.21778	-3.91233	-4.83023	-4.11046	-4.8775	-3.85997	-4.65528	-3.90288	-4.44162	-4.44411	-4.20167
Acot11	-3.95035	-4.02159	-4.39914	-4.14772	-3.82261	1.75659	-4.76184	1.51014	-3.91233	-4.83023	-4.11046	-4.8775	-2.27501	-4.65528	4.53591	-4.44162	-4.44411	-4.20167
Acot12	-3.95035	-4.02159	-4.39914	-4.14772	-1.01526	-5.27683	-4.76184	-4.21778	-3.91233	-4.83023	-4.11046	-4.8775	-3.85997	-4.65528	-3.90288	-4.44162	-4.44411	-4.20167
Acot13	1.93229	1.47026	4.626	4.80356	1.95875	2.91793	-2.43991	7.18577	1.13207	1.6455	4.55842	5.34046	6.19667	4.17444	2.32594	-4.44162	6.16968	0.55322
Acot2	-3.95035	-4.02159	-4.39914	0.375841	1.38684	3.80266	-4.76184	-4.21778	7.55069	4.15561	-4.11046	1.46235	-2.27501	-4.65528	-3.90288	-0.354156	-4.44411	2.998
Acot3	-3.95035	-4.02159	-4.39914	-4.14772	-3.82261	-5.27683	-4.76184	-4.21778	-3.91233	-4.83023	-4.11046	-4.8775	-3.85997	-4.65528	-3.90288	-4.44162	-4.44411	-4.20167
Acot4	-3.95035	-4.02159	-4.39914	-4.14772	-3.82261	-5.27683	-4.76184	-4.21778	-3.91233	-4.83023	-4.11046	-4.8775	-3.85997	-4.65528	-3.90288	-4.44162	-4.44411	-4.20167
Acot5	-3.95035	-4.02159	-4.39914	-4.14772	-3.82261	-5.27683	-4.76184	-4.21778	-3.91233	-4.83023	-4.11046	-4.8775	-3.85997	-4.65528	-3.90288	-4.44162	-4.44411	-4.20167
Acot6	-2.36539	-4.02159	-4.39914	-4.14772	-3.82261	0.789261	-4.76184	-4.21778	4.46705	-4.83023	-4.11046	0.166898	-3.85997	-4.65528	-3.90288	-4.44162	-2.85915	-4.20167
Acot7	1.17893	-2.43663	-4.39914	-4.14772	-3.82261	-0.884511	0.910585	2.25796	-3.91233	0.123964	-4.11046	-0.790034	-3.85997	2.44275	3.73375	4.8553	5.15766	-4.20167
Acot8	2.1994	-4.02159	-4.39914	6.62459	-3.82261	2.05409	-4.76184	4.37094	2.90785	1.1005	1.01882	1.05324	-3.85997	2.98134	1.82504	3.20943	-2.85915	-4.20167
Acot9	-3.95035	-2.43663	3.72498	-0.977796	-3.82261	2.34522	-4.76184	-2.63281	-3.91233	2.01526	-0.203571	0.737213	-2.27501	0.202701	3.44585	-4.44162	4.54173	-4.20167
Acox1	-1.62842	2.71987	4.13613	3.41452	3.47201	5.66788	6.17994	4.47222	3.87558	6.29195	6.89586	6.308	2.07077	5.4202	5.36156	5.02802	7.52636	7.29469
Acox2	-3.95035	-4.02159	-4.39914	-4.14772	-3.82261	-3.69187	-4.76184	-4.21778	-3.91233	-4.83023	-4.11046	-1.41806	-3.85997	-4.65528	-3.90288	-4.44162	-4.44411	-4.20167
Acox3	6.27727	9.373	8.24269	8.20018	6.77637	6.95589	7.30189	5.91537	8.52308	6.57863	5.59517	7.17609	6.18306	7.0671	6.73646	6.00443	7.14507	7.07504
Acoxl	-3.95035	-4.02159	-4.39914	-4.14772	-3.82261	-5.27683	-4.76184	-4.21778	-3.91233	-4.83023	-4.11046	-4.8775	-3.85997	-4.65528	-3.90288	-4.44162	-4.44411	-4.20167
Acp1	1.54151	3.44601	4.5867	7.26749	-1.01526	5.51302	5.34799	4.69212	6.81134	5.08451	-0.410022	5.00972	4.47542	6.65704	5.0943	4.87805	5.13521	5.44759
Acp2	9.33593	8.22144	8.04328	8.5705	8.8224	8.63989	9.04829	8.23873	10.0149	7.84465	7.98548	8.92266	9.31916	8.64624	8.61209	7.37704	8.51642	9.30495
Acp5	-3.95035	-4.02159	-4.39914	-4.14772	0.264849	-5.27683	-4.76184	-4.21778	-3.91233	-4.83023	-4.11046	-4.8775	-3.85997	-4.65528	-3.90288	-4.44162	-4.44411	-4.20167
Acp6	1.00385	6.12179	4.03131	4.33206	5.47888	1.75659	-1.59192	4.063	-1.5904	4.31187	-2.5255	6.14834	-1.05262	2.13914	7.31205	4.39443	-2.12218	5.89505
Acpp	-3.95035	-4.02159	-4.39914	-4.14772	-3.82261	-5.27683	-4.76184	-4.21778	-3.91233	-4.83023	-4.11046	-4.8775	-3.85997	-4.65528	-3.90288	-4.44162	-4.44411	-4.20167
Acpt	-3.95035	-4.02159	-4.39914	-4.14772	-3.82261	-5.27683	-4.76184	-4.21778	-3.91233	-4.83023	-4.11046	-4.8775	-3.85997	-4.65528	-3.90288	-4.44162	-4.44411	-4.20167
Acr	-3.95035	-4.02159	-4.39914	-4.14772	-3.82261	-5.27683	-4.76184	-4.21778	-3.91233	-4.83023	-4.11046	-4.8775	-3.85997	-4.65528	-3.90288	-4.44162	-4.44411	-4.20167
Acrbp	6.17765	3.81761	0.810313	0.244596	2.68518	4.41142	6.88697	5.92816	2.01841	3.90786	2.48945	4.96956	-2.27501	3.50963	4.84195	4.95284	4.96316	5.49008
Acrv1	-3.95035	-4.02159	-4.39914	-4.14772	-3.82261	-5.27683	-4.76184	-4.21778	-3.91233	-4.83023	-4.11046	-4.8775	-3.85997	-4.65528	-3.90288	-4.44162	-4.44411	-4.20167
Acsbg1	-3.95035	-4.02159	-4.39914	-4.14772	-3.82261	3.63905	-4.76184	-4.21778	-2.32736	-4.83023	-4.11046	-4.8775	-3.85997	-4.65528	-3.90288	-4.44162	-4.44411	-4.20167
Acsbg2	-3.95035	-4.02159	-4.39914	-4.14772	-3.82261	-5.27683	-4.76184	-4.21778	-3.91233	-4.83023	-4.11046	-4.8775	-3.85997	-4.65528	-3.90288	-4.44162	-4.44411	-4.20167
Acsf2	0.573214	-4.02159	0.730143	-1.34037	4.35231	1.29303	5.82781	-0.517336	-3.91233	2.84925	7.65979	1.83675	-2.27501	1.41081	2.69703	8.38949	5.769	4.33361
Acsf3	-3.95035	-4.02159	0.124421	-4.14772	-3.82261	2.1578	-4.76184	1.51014	1.44523	2.58762	3.70332	-4.8775	4.47542	-0.748389	-3.90288	-4.44162	2.75556	0.656313
Acsl1	1.88254	7.5132	4.34569	3.66606	4.52168	5.09277	6.38854	6.80806	8.03859	6.14919	4.69367	5.70276	6.47654	5.34894	3.80448	4.70049	7.78381	5.71272
Acsl3	-3.95035	-4.02159	-4.39914	-2.56276	-3.82261	2.35267	-4.76184	4.5603	-3.91233	2.63737	4.69354	4.22841	-3.85997	4.05553	-3.90288	3.18043	1.22832	-0.114205
Acsl4	7.09609	7.01527	5.73913	5.48709	7.89034	6.00915	6.04148	5.58474	7.00728	7.08078	7.24654	6.94228	7.68451	6.05122	5.88012	7.11441	5.94928	4.53642
Acsl5	4.8857	7.52963	6.95014	6.93775	6.61306	6.05129	5.10389	6.54128	6.55018	6.24725	7.97335	5.48115	4.17895	4.08955	4.86861	5.9836	5.67094	6.60004
Acsl6	-3.95035	-4.02159	-4.39914	-4.14772	-3.82261	-1.8174	-4.76184	-4.21778	-3.91233	-4.83023	-4.11046	-4.8775	-3.85997	-4.65528	-3.90288	-4.44162	-4.44411	-4.20167
Acsm1	-3.95035	-4.02159	-4.39914	-4.14772	-3.82261	-5.27683	-4.76184	-4.21778	-3.91233	-4.83023	-4.11046	-4.8775	-3.85997	-4.65528	-3.90288	-4.44162	-4.44411	-4.20167
Acsm2	-3.95035	-4.02159	-4.39914	-4.14772	-3.82261	-5.27683	-4.76184	-4.21778	-3.91233	-4.83023	-4.11046	-4.8775	-3.85997	-4.65528	-3.90288	-4.44162	-4.44411	-4.20167
Acsm3	-3.95035	-4.02159	-4.39914	-4.14772	-3.82261	-5.27683	-4.76184	-4.21778	-3.91233	-4.83023	-4.11046	-4.8775	-3.85997	-4.65528	-3.90288	-4.44162	-4.44411	-4.20167
Acsm4	-3.95035	-4.02159	-4.39914	-4.14772	-3.82261	-5.27683	-4.76184	-4.21778	-3.91233	-4.83023	-4.11046	-4.8775	-3.85997	-4.65528	-3.90288	-4.44162	-4.44411	-4.20167
Acsm5	-3.95035	-4.02159	-4.39914	-4.14772	-3.82261	-5.27683	-4.76184	-4.21778	-3.91233	-4.83023	-4.11046	-4.8775	-3.85997	-4.65528	-3.90288	-4.44162	-4.44411	-4.20167
Acss1	6.31057	5.48818	4.56953	6.05807	5.97343	6.7528	7.33323	8.18124	5.50342	5.89001	4.73816	5.96249	1.92139	6.91884	4.99497	6.13864	6.09796	6.73865
Acss2	-3.95035	-4.02159	0.124421	-4.14772	-0.652689	3.31189	-4.76184	-4.21778	-3.91233	0.527319	-4.11046	-0.790034	-3.85997	-3.07032	-3.90288	-4.44162	-0.537218	-4.20167
Acss2os	-3.95035	-4.02159	-4.39914	-4.14772	-3.82261	-5.27683	-4.76184	-4.21778	-3.91233	-4.83023	-4.11046	-4.8775	-3.85997	-4.65528	-3.90288	-4.44162	-4.44411	-4.20167
Acss3	-3.95035	-4.02159	-4.39914	-4.14772	-3.82261	-5.27683	-4.76184	-4.21778	-3.91233	-4.83023	-4.11046	-4.8775	-3.85997	-4.65528	-3.90288	-4.44162	-4.44411	-4.20167
Acta1	-3.95035	-4.02159	-4.39914	-4.14772	-3.82261	-5.27683	-4.76184	-4.21778	-3.91233	-4.83023	-4.11046	-4.8775	-3.85997	-4.65528	-3.90288	-4.44162	-4.44411	-4.20167
Acta2	0.804539	2.54826	-4.39914	3.58699	3.0722	3.25845	-1.95449	-4.21778	-3.91233	1.47355	4.59344	2.26205	-3.85997	-2.33335	-3.90288	-4.44162	3.31744	1.08373
Actb	12.3966	12.0406	11.4376	11.6624	11.2746	10.9907	11.1921	11.1901	11.495	11.4382	11.5404	10.7521	12.4382	10.8231	11.1713	11.62	11.5325	11.5692
Actbl2	-3.95035	-4.02159	-4.39914	-4.14772	-3.82261	-5.27683	-4.76184	-4.21778	-3.91233	-4.83023	-4.11046	-4.8775	-3.85997	-4.65528	-3.90288	-4.44162	-4.44411	-4.20167
Actc1	-3.95035	-4.02159	-4.39914	-4.14772	-3.82261	-5.27683	-4.76184	-4.21778	-3.91233	-4.83023	-4.11046	-4.8775	-3.85997	-4.65528	-3.90288	-4.44162	-4.44411	-4.20167
Actg1	7.32286	8.39547	7.58136	7.8888	7.75056	7.70242	8.87626	7.65912	7.99419	7.80617	7.05633	6.61686	8.17723	5.83356	8.15342	7.72297	8.26131	5.84409
Actg2	-3.95035	-4.02159	-4.39914	-4.14772	-3.82261	-5.27683	-4.76184	-4.21778	-3.91233	-4.83023	-4.11046	-4.8775	-3.85997	-4.65528	-3.90288	-4.44162	-4.44411	-4.20167
Actl10	-3.95035	-4.02159	-4.39914	-4.14772	-3.82261	-5.27683	-4.76184	-4.21778	-3.91233	-4.83023	-4.11046	-4.8775	-3.85997	-4.65528	-3.90288	-4.44162	-4.44411	-4.20167
Actl11	-3.95035	-4.02159	-4.39914	-4.14772	-3.82261	-5.27683	-4.76184	-4.21778	-3.91233	-4.83023	-4.11046	-4.8775	-3.85997	-4.65528	-3.90288	-4.44162	-4.44411	-4.20167
Actl6a	4.14241	-2.43663	4.72239	-0.68829	-3.82261	3.05856	2.86021	4.0254	-2.32736	4.38651	-1.30311	3.7555	7.19734	-0.0114236	5.7063	4.58352	-0.743669	4.16902
Actl6b	-3.95035	-4.02159	-4.39914	-4.14772	-3.82261	-5.27683	-4.76184	-4.21778	-3.91233	-4.83023	-4.11046	-4.8775	-3.85997	-4.65528	-3.90288	-4.44162	-4.44411	-4.20167
Actl7a	3.58103	-4.02159	-4.39914	-4.14772	-3.82261	-5.27683	-4.76184	-4.21778	-3.91233	-4.83023	-4.11046	-4.8775	-3.85997	-4.65528	-3.90288	-4.44162	-4.44411	-4.20167
Actl7b	-3.95035	-4.02159	-4.39914	-4.14772	-3.82261	-5.27683	-4.76184	-2.63281	-3.91233	-4.83023	-4.11046	-4.8775	-3.85997	-4.65528	-3.90288	-4.44162	-4.44411	-4.20167
Actl9	-3.95035	-4.02159	-4.39914	-4.14772	-3.82261	-5.27683	-4.76184	-4.21778	-3.91233	-4.83023	-4.11046	-4.8775	-3.85997	-4.65528	-3.90288	-4.44162	-4.44411	-4.20167
Actn1	0.441969	4.61865	5.20634	4.90485	4.55676	3.97347	5.84641	-4.21778	2.56341	3.92131	-0.65103	3.04732	1.63188	4.66439	1.97976	-0.534728	2.65392	5.33166
Actn2	-3.95035	-4.02159	-4.39914	-4.14772	-3.82261	-5.27683	-4.76184	-4.21778	-3.91233	-4.83023	-4.11046	-4.8775	-3.85997	-4.65528	-3.90288	-4.44162	-4.44411	-4.20167
Actn3	-3.95035	-4.02159	-4.39914	-4.14772	-3.82261	-5.27683	-4.76184	-4.21778	-3.91233	-4.83023	-4.11046	-4.8775	-3.85997	-4.65528	-3.90288	-4.44162	-4.44411	-4.20167
Actn4	5.65142	6.43065	4.80235	6.73721	5.9036	5.00046	4.90172	6.48946	4.86608	5.05988	5.89654	5.86682	3.15126	6.44996	4.40546	4.90892	8.32594	2.86054
Actr10	-2.36539	6.81367	3.56086	7.52249	4.73581	5.34431	2.10852	5.04197	6.13616	4.75285	3.10871	4.75368	5.98081	1.41081	1.82504	4.67991	4.71324	-1.39431
Actr1a	10.2343	6.63215	6.08769	5.9224	4.41101	6.67409	7.23992	6.12763	5.22467	5.90701	8.55243	6.74501	0.227492	7.06625	6.32233	7.33028	3.93527	6.25674
Actr1b	6.29402	4.77607	5.77952	4.47799	7.85994	6.43527	4.46938	3.83207	7.29774	5.62201	5.23605	6.23299	7.5563	5.96219	5.06002	4.69537	2.12575	4.81235
Actr2	8.93897	7.98719	8.29891	8.2112	8.33252	8.42978	9.01326	8.77675	9.18653	8.41279	8.08091	8.34454	9.8475	9.13822	8.7226	8.00055	8.05997	8.59741
Actr3	9.0264	8.71587	9.0522	7.70051	6.74819	8.00583	5.25078	8.18017	9.34962	7.86173	8.17985	7.28017	9.24217	7.24747	8.87705	8.7579	7.7934	7.94776
Actr3b	-3.95035	-4.02159	-4.39914	-4.14772	-3.82261	-5.27683	-4.76184	-4.21778	-3.91233	-4.83023	-4.11046	-4.8775	-3.85997	-4.65528	-3.90288	-4.44162	-4.44411	-4.20167
Actr5	2.42469	-4.02159	3.65071	0.496135	0.932273	1.77845	2.51428	0.305786	2.2775	-1.12979	-4.11046	3.4668	-2.27501	5.03646	4.42355	-4.44162	0.841294	-1.39431
Actr6	-3.95035	-4.02159	2.14002	-4.14772	0.821242	4.2565	-3.17688	-4.21778	-3.91233	2.5185	4.63437	-4.8775	-1.53804	-1.84792	2.02786	2.73829	-2.85915	-4.20167
Actr8	3.08307	1.533	2.69889	2.11907	0.569703	1.9993	2.15702	3.03961	5.62877	5.34344	3.45178	5.3234	-1.53804	4.0065	0.620683	1.53566	5.26152	3.63754
Actrt1	-3.95035	-4.02159	-4.39914	-4.14772	-3.82261	-5.27683	-4.76184	-4.21778	-3.91233	-4.83023	-4.11046	-4.8775	-3.85997	-4.65528	-3.90288	-4.44162	-4.44411	-4.20167
Actrt2	-3.95035	-4.02159	-4.39914	-4.14772	-3.82261	-5.27683	-4.76184	-4.21778	-3.91233	-4.83023	-4.11046	-4.8775	-3.85997	-4.65528	-3.90288	-4.44162	-4.44411	-4.20167
Actrt3	-3.95035	-4.02159	-4.39914	-4.14772	-3.82261	-5.27683	-4.76184	-4.21778	-3.91233	-4.83023	-4.11046	-4.8775	-3.85997	-4.65528	-3.90288	-4.44162	-4.44411	-4.20167
Acvr1	0.137115	6.96638	4.17451	7.83848	-0.363182	5.84794	5.68214	2.81565	-0.0054351	7.16164	6.13865	5.86986	5.21417	7.11249	7.88053	6.03715	2.61117	4.55656
Acvr1b	3.96254	2.94419	5.23567	5.53352	5.40861	3.09386	4.17774	0.42608	3.75301	4.82976	-4.11046	3.42171	-3.85997	2.93718	5.78886	6.67537	-2.85915	6.66484
Acvr1c	-3.95035	-4.02159	-4.39914	-4.14772	-3.82261	-5.27683	-4.76184	-4.21778	-3.91233	-4.83023	-4.11046	-4.8775	-3.85997	-4.65528	-3.90288	-4.44162	-4.44411	-4.20167
Acvr2a	5.07418	5.00188	4.88395	3.83459	6.58936	4.85467	5.13525	7.00562	8.56099	5.76303	5.44543	5.35497	6.55471	4.18669	5.94896	5.31374	5.06039	6.44646
Acvr2b	1.17893	-4.02159	2.91374	2.59375	-3.82261	1.71186	0.664424	3.09511	-3.91233	-3.24527	2.68395	3.68092	-3.85997	-3.07032	-0.732954	-4.44162	3.08727	1.08373
Acvrl1	4.00965	-2.43663	-2.81418	2.84096	-1.01526	4.19281	0.96608	0.991678	3.41859	5.44938	3.482	1.99287	5.85599	4.18707	-3.90288	2.75805	2.77506	2.87515
Acy1	-3.95035	-0.321154	0.124421	0.496135	4.40139	2.05409	2.72197	-1.89585	6.86657	3.78815	1.50425	3.11686	4.39269	3.62549	0.184584	-1.63426	1.82268	0.0462599
Acy3	-3.95035	-4.02159	-4.39914	-4.14772	-3.82261	-5.27683	-4.76184	-4.21778	-3.91233	-4.83023	-4.11046	-4.8775	-3.85997	-4.65528	-3.90288	-4.44162	-4.44411	-4.20167
Acyp1	6.24071	-4.02159	4.37235	-4.14772	3.09625	2.76209	-1.30241	-4.21778	2.98249	2.48265	2.78436	3.20465	1.92139	-4.65528	1.14151	-4.44162	-2.85915	-4.20167
Acyp2	-3.95035	-4.02159	-4.39914	1.78302	-3.82261	-5.27683	-4.76184	3.41885	-3.91233	-4.83023	-4.11046	-4.8775	-3.85997	-4.65528	-3.90288	-4.44162	-4.44411	-4.20167
Ada	6.0872	-4.02159	-4.39914	-4.14772	-3.82261	0.395597	-3.17688	-4.21778	-3.91233	2.89087	-4.11046	-1.70757	-3.85997	-4.65528	-2.31792	-2.85666	1.57826	-4.20167
Adad1	-3.95035	-4.02159	-4.39914	-4.14772	-3.82261	-5.27683	-4.76184	-4.21778	-3.91233	-4.83023	-4.11046	-4.8775	-3.85997	-4.65528	-3.90288	-4.44162	-4.44411	-4.20167
Adad2	-3.95035	-4.02159	-4.39914	-4.14772	-3.82261	-5.27683	-4.76184	-4.21778	-3.91233	-4.83023	-4.11046	-4.8775	-3.85997	-4.65528	-3.90288	-4.44162	-4.44411	-4.20167
Adal	2.07202	3.39237	-2.81418	3.65318	1.13158	2.8981	-4.76184	5.86304	3.40056	4.13843	-4.11046	2.24144	0.227492	5.26805	1.30657	0.202237	-4.44411	4.88844
Adam10	8.24533	8.22247	7.71036	8.01436	7.19071	7.90479	8.00282	5.79764	7.89543	7.3636	8.00556	7.93889	8.44295	7.96012	7.83395	8.01909	8.2942	7.22092
Adam11	-3.95035	-4.02159	-4.39914	-4.14772	-3.82261	-2.9549	-4.76184	-4.21778	-1.5904	-4.83023	-4.11046	-4.8775	-2.27501	-4.65528	-3.90288	-4.44162	-4.44411	6.54401
Adam15	9.08977	9.07529	8.52586	7.37241	8.00274	7.27704	7.99826	8.34136	8.62998	7.17785	8.09747	7.58526	9.72863	7.38946	5.6802	7.00701	7.96077	7.27963
Adam17	8.12212	8.69886	7.56989	6.62129	7.82079	7.74987	8.12671	7.56399	6.58652	7.94188	6.09044	8.223	8.45433	8.6207	7.9089	7.99483	7.16091	8.784
Adam18	-3.95035	-4.02159	-2.81418	-1.82579	1.13158	-5.27683	-4.76184	2.85904	-0.452894	1.39859	-4.11046	-4.8775	-3.85997	-4.65528	-3.90288	-4.44162	-4.44411	-4.20167
Adam19	-3.95035	-4.02159	-4.39914	-4.14772	-3.82261	-5.27683	-4.76184	-4.21778	-3.91233	-4.83023	-4.11046	-4.8775	-3.85997	-4.65528	-3.90288	-4.44162	-4.44411	-4.20167
Adam1a	5.63649	-4.02159	-4.39914	1.87465	-3.82261	1.79999	-4.76184	-2.63281	-3.91233	2.50068	-4.11046	4.35852	-3.85997	-4.65528	-2.31792	0.915933	-0.743669	1.2246
Adam1b	-3.95035	-2.43663	1.27328	-4.14772	-3.82261	-5.27683	-4.76184	-4.21778	-3.91233	-4.83023	-4.11046	-4.8775	-3.85997	-4.65528	-3.90288	-4.44162	-4.44411	-4.20167
Adam2	-3.95035	-4.02159	-4.39914	-4.14772	-3.82261	-5.27683	-4.76184	-4.21778	-3.91233	-4.83023	-4.11046	-4.8775	-3.85997	-4.65528	-3.90288	-4.44162	-4.44411	-4.20167
Adam20	-3.95035	-4.02159	-4.39914	-4.14772	-3.82261	-5.27683	-4.76184	-4.21778	-3.91233	-4.83023	-4.11046	-4.8775	-3.85997	-4.65528	-3.90288	-4.44162	-4.44411	-4.20167
Adam21	-3.95035	-4.02159	-4.39914	-4.14772	-3.82261	-5.27683	-4.76184	-4.21778	-3.91233	-4.83023	-4.11046	-4.8775	-3.85997	-4.65528	-3.90288	-4.44162	1.33725	-4.20167
Adam22	-3.95035	-2.43663	-4.39914	2.67246	3.16607	3.50125	1.71389	2.29002	-2.32736	1.91123	-0.65103	4.13093	-0.690046	0.474003	-3.90288	-2.85666	-2.85915	1.35292
Adam23	-3.95035	-4.02159	-4.39914	-4.14772	-3.82261	0.700452	-4.76184	-4.21778	-3.91233	-4.83023	-4.11046	-4.8775	-3.85997	-4.65528	-3.90288	-4.44162	-4.44411	-4.20167
Adam24	-3.95035	-4.02159	-4.39914	-4.14772	-3.82261	-5.27683	-4.76184	-4.21778	-3.91233	-4.83023	-4.11046	-4.8775	-3.85997	-4.65528	-3.90288	-4.44162	-4.44411	-4.20167
Adam25	-3.95035	-4.02159	-4.39914	-4.14772	-3.82261	-5.27683	-4.76184	-4.21778	-3.91233	-4.83023	-4.11046	-4.8775	-3.85997	-4.65528	-3.90288	-4.44162	-4.44411	-4.20167
Adam26a	-3.95035	-4.02159	-4.39914	-4.14772	-3.82261	-5.27683	-4.76184	-4.21778	-3.91233	-4.83023	-4.11046	-4.8775	-3.85997	-4.65528	-3.90288	-4.44162	-4.44411	-4.20167
Adam26b	-3.95035	-4.02159	-4.39914	-4.14772	-3.82261	-5.27683	-4.76184	-4.21778	-3.91233	-4.83023	-4.11046	-4.8775	-3.85997	-4.65528	-3.90288	-4.44162	-4.44411	-4.20167
Adam28	-3.95035	-4.02159	-4.39914	-4.14772	-3.82261	-5.27683	-4.76184	-4.21778	-3.91233	-4.83023	-4.11046	-4.8775	-3.85997	-4.65528	-3.90288	-4.44162	-4.44411	-4.20167
Adam29	-3.95035	-4.02159	-4.39914	-4.14772	-3.82261	-5.27683	-4.76184	-4.21778	-3.91233	-4.83023	-4.11046	-4.8775	-3.85997	-4.65528	-3.90288	-4.44162	-4.44411	-4.20167
Adam3	-3.95035	-4.02159	-2.07721	-1.82579	-3.82261	1.06302	-1.59192	1.51014	1.70238	0.123964	1.3158	-0.485179	5.05591	4.25461	-3.90288	-2.11969	1.93093	3.36057
Adam30	-3.95035	-4.02159	-4.39914	-4.14772	-3.82261	-5.27683	-4.76184	-4.21778	-3.91233	-4.83023	-4.11046	-0.629569	-3.85997	-4.65528	-3.90288	-4.44162	-4.44411	-4.20167
Adam32	-3.95035	-4.02159	-4.39914	-4.14772	-3.82261	-5.27683	-4.76184	-4.21778	-3.91233	-4.83023	-4.11046	-4.8775	-3.85997	-4.65528	-3.90288	-4.44162	-4.44411	-4.20167
Adam33	-3.95035	-4.02159	-4.39914	-4.14772	-3.82261	-5.27683	-4.76184	-4.21778	-3.91233	-4.83023	-4.11046	0.407906	-3.85997	-4.65528	-3.90288	-4.44162	-4.44411	-4.20167
Adam34	-3.95035	-4.02159	-4.39914	-4.14772	-3.82261	-5.27683	-4.76184	-4.21778	-3.91233	-4.83023	-4.11046	-4.8775	-3.85997	-4.65528	-3.90288	-4.44162	-4.44411	-4.20167
Adam39	-3.95035	-4.02159	-4.39914	-4.14772	-3.82261	-5.27683	-4.76184	-4.21778	-3.91233	-4.83023	-4.11046	-4.8775	-3.85997	-4.65528	-3.90288	-4.44162	-4.44411	-4.20167
Adam4	4.70429	-1.21424	5.05413	2.11907	-3.82261	1.09821	-1.59192	-4.21778	-3.91233	0.66162	-0.65103	3.88738	-2.27501	3.75649	-0.732954	-4.44162	-0.743669	2.76412
Adam5	-3.95035	-4.02159	-4.39914	-4.14772	-3.82261	-5.27683	-4.76184	-4.21778	-3.91233	-4.83023	-4.11046	-4.8775	-3.85997	-4.65528	-3.90288	-4.44162	-4.44411	-4.20167
Adam6a	-3.95035	-4.02159	-4.39914	-4.14772	-3.82261	-5.27683	-4.76184	-4.21778	-3.91233	-4.83023	-4.11046	-4.8775	-3.85997	-4.65528	-3.90288	-4.44162	-4.44411	-4.20167
Adam6b	-3.95035	-4.02159	2.01025	-4.14772	-3.82261	-5.27683	-4.76184	-4.21778	-3.91233	-4.83023	-4.11046	-2.55557	-3.85997	-4.65528	-3.90288	-4.44162	-4.44411	-4.20167
Adam7	-3.95035	-4.02159	-4.39914	-4.14772	-3.82261	-5.27683	-4.76184	-4.21778	-3.91233	-4.83023	-4.11046	-4.8775	-3.85997	-4.65528	-3.90288	-4.44162	-4.44411	-4.20167
Adam8	-3.95035	5.60229	0.645254	-2.56276	-2.23765	-1.18937	-4.76184	-4.21778	-3.91233	-3.24527	-4.11046	4.06795	-3.85997	-2.33335	-3.90288	-4.44162	-4.44411	-4.20167
Adam9	-2.36539	5.72156	5.92391	5.26802	1.7921	4.71611	3.07736	4.58636	-0.0054351	4.12687	1.6709	5.56855	2.54942	5.32914	4.5442	5.40857	4.82033	4.62806
Adamdec1	-3.95035	-4.02159	-4.39914	-4.14772	-3.82261	-5.27683	-4.76184	-4.21778	-3.91233	-4.83023	-4.11046	-4.8775	-3.85997	-4.65528	-3.90288	-4.44162	-4.44411	-4.20167
Adamts1	-3.95035	-4.02159	-4.39914	-4.14772	-3.82261	-5.27683	-4.76184	-4.21778	-3.91233	-4.83023	-4.11046	-0.629569	-3.85997	-3.07032	-3.90288	-2.11969	-4.44411	4.88314
Adamts10	-1.62842	-4.02159	4.70152	-4.14772	4.12575	5.25358	-3.17688	0.305786	3.32608	3.73582	-2.5255	5.27352	-3.85997	5.85548	4.60095	5.1072	3.33068	4.64068
Adamts13	-2.36539	-4.02159	-2.07721	-4.14772	-2.23765	-0.632972	-4.76184	-4.21778	-3.91233	-4.83023	-2.5255	-0.790034	-3.85997	-3.07032	-3.90288	-4.44162	-4.44411	-2.61671
Adamts16	2.31644	-1.69967	1.5316	5.56481	2.68518	4.84859	5.13449	2.96213	4.74231	5.59288	4.52253	3.37517	5.92303	3.88	4.92049	5.77634	4.81563	-4.20167
Adamts18	-3.95035	-4.02159	-4.39914	-4.14772	-3.82261	-5.27683	-4.76184	-4.21778	-3.91233	-4.83023	-4.11046	-4.8775	-3.85997	-4.65528	-3.90288	-4.44162	-4.44411	-4.20167
Adamts19	-3.95035	-4.02159	-4.39914	-4.14772	-3.82261	-5.27683	-4.76184	-4.21778	-3.91233	-4.83023	-4.11046	-4.8775	-3.85997	-4.65528	-3.90288	-4.44162	-4.44411	-4.20167
Adamts2	-3.95035	-4.02159	-4.39914	-4.14772	-3.82261	-5.27683	-4.76184	-4.21778	-3.91233	-4.83023	-4.11046	-4.8775	-3.85997	-4.65528	-3.90288	-4.44162	-4.44411	-4.20167
Adamts20	-3.95035	-4.02159	-4.39914	-4.14772	-3.82261	0.74554	-4.76184	-4.21778	-3.91233	-4.83023	-4.11046	-4.8775	-3.85997	-4.65528	-3.90288	-4.44162	-4.44411	-4.20167
Adamts3	-3.95035	-4.02159	-4.39914	-4.14772	-3.82261	-5.27683	-4.76184	-4.21778	-3.91233	-4.83023	-4.11046	-4.8775	-3.85997	-4.65528	-3.90288	-4.44162	-4.44411	-4.20167
Adamts4	-3.95035	-4.02159	-4.39914	-4.14772	-3.82261	-5.27683	-4.76184	-4.21778	-3.91233	-4.83023	-4.11046	-4.8775	-3.85997	-4.65528	-3.90288	-4.44162	-4.44411	-4.20167
Adamts6	1.93229	1.0228	4.97807	-0.977796	-2.23765	2.1578	-0.85495	5.39509	-2.32736	1.76968	-0.65103	1.59824	5.96499	2.28723	0.00401147	-2.85666	-4.44411	3.65008
Adamts8	-3.95035	-4.02159	-4.39914	-4.14772	-3.82261	-5.27683	-4.76184	-4.21778	-3.91233	-4.83023	-4.11046	-4.8775	-3.85997	-4.65528	-3.90288	-4.44162	-4.44411	-4.20167
Adamtsl2	1.33505	-4.02159	-0.698701	-0.240831	-3.82261	2.73998	-4.76184	1.84831	-3.91233	-4.83023	-4.11046	-4.8775	-3.85997	-4.65528	-3.90288	0.602775	-4.44411	2.24128
Adamtsl4	-3.95035	-4.02159	-4.39914	-4.14772	-3.82261	1.43742	-4.76184	1.71296	-3.91233	2.48265	-4.11046	-4.8775	-3.85997	-4.65528	-3.90288	-4.44162	-4.44411	-4.20167
Adamtsl5	-3.95035	-4.02159	-4.39914	-4.14772	-3.82261	-5.27683	-4.76184	-4.21778	-3.91233	-4.83023	-4.11046	-4.8775	-3.85997	-4.65528	-3.90288	-4.44162	-4.44411	-4.20167
Adap1	-3.95035	5.20963	0.355747	-4.14772	-3.82261	3.40617	-4.76184	-4.21778	4.87884	-3.24527	-4.11046	4.07961	-2.27501	-0.95484	2.81137	-4.44162	-4.44411	-4.20167
Adap2	9.58796	9.25118	9.00187	8.88862	9.42872	9.04728	8.65113	8.63456	9.00225	8.71123	8.11926	8.93257	8.10762	9.25621	7.4353	8.89196	9.65187	9.97412
Adar	6.96179	3.01183	4.1205	2.77114	7.75245	5.79396	-0.369523	5.40611	1.21696	3.61685	1.91191	3.20465	-2.27501	5.38227	0.00401147	-0.741179	5.60982	4.47429
Adarb1	1.77757	-1.69967	5.33387	-4.14772	1.84981	2.78387	4.86204	-4.21778	6.87149	2.80639	4.59344	3.27732	-3.85997	3.61618	-2.31792	-0.534728	3.43241	3.34523
Adarb2	-3.95035	-1.21424	-4.39914	-4.14772	-3.82261	-5.27683	-3.17688	-4.21778	-3.91233	-4.83023	-4.11046	-4.8775	-3.85997	-4.65528	-3.90288	-4.44162	-4.44411	-4.20167
Adat1	4.05528	-0.321154	0.958412	-4.14772	0.0842765	1.26233	-1.95449	-4.21778	-3.91233	-3.24527	-1.78853	2.8707	6.76117	-1.48535	-2.31792	-2.85666	2.49841	1.08373
Adat2	-3.95035	-4.02159	-2.07721	-4.14772	-3.82261	2.7288	-4.76184	-4.21778	-3.91233	-1.66031	-0.940537	-0.122609	-3.85997	-4.65528	-3.90288	-4.44162	-4.44411	-4.20167
Adat3	-3.95035	-4.02159	-4.39914	-4.14772	-3.82261	1.86272	-4.76184	-4.21778	-3.91233	-3.24527	-4.11046	-4.8775	-3.85997	-4.65528	-3.90288	-4.44162	-4.44411	0.55322
Adc	-3.95035	-4.02159	-4.39914	-4.14772	-3.82261	-5.27683	-4.76184	-4.21778	-3.91233	-4.83023	-4.11046	-4.8775	-3.85997	-4.65528	-3.90288	-4.44162	-4.44411	-4.20167
Adck1	-2.36539	6.96069	4.95621	-4.14772	4.29113	3.4814	-1.59192	0.736421	2.56341	1.39859	-1.78853	3.28741	5.73062	5.63359	3.93632	-2.11969	1.85967	2.74085
Adck2	-0.0434575	6.03775	4.48656	2.29522	6.09476	5.23789	6.62779	-1.04785	4.32129	5.30548	4.75682	4.22841	-3.85997	4.14885	3.54833	4.77027	6.52959	4.829
Adck3	0.907633	-4.02159	3.76577	-4.14772	0.932273	2.68317	4.48884	-1.41042	-3.91233	3.34469	2.54489	-3.29253	-3.85997	-4.65528	4.23155	-4.44162	-4.44411	-4.20167
Adck4	1.25911	-4.02159	3.82486	-4.14772	6.2582	4.77981	0.852869	2.92178	-2.32736	4.00582	-1.78853	4.07379	5.31246	3.14562	1.87848	3.51838	-0.743669	2.6687
Adck5	2.11574	7.66184	2.0438	-2.56276	6.02444	4.06969	0.447613	0.0301518	-1.5904	0.123964	4.97435	3.35612	3.3397	4.02771	6.05857	-0.0493013	-2.85915	-0.742236
Adcy1	-3.95035	-4.02159	4.09671	-4.14772	-3.82261	0.080724	4.49319	-4.21778	-1.10497	1.43655	-1.30311	2.60632	-3.85997	-4.65528	-3.90288	-4.44162	-0.356646	2.02715
Adcy2	-3.95035	-4.02159	-4.39914	-0.68829	-3.82261	0.080724	-4.76184	-4.21778	-3.91233	-4.83023	-4.11046	-4.8775	-3.85997	-4.65528	-3.90288	-4.44162	-4.44411	-4.20167
Adcy3	-3.95035	-4.02159	-4.39914	-4.14772	-2.21854	0.770623	1.71389	-2.63281	-3.91233	-4.83023	-4.11046	0.140425	-3.85997	-4.65528	-3.90288	-4.44162	-1.27418	-4.20167
Adcy4	-3.95035	-4.02159	-4.39914	-4.14772	-3.82261	-5.27683	-4.76184	-4.21778	-3.91233	3.63329	-4.11046	-4.8775	-2.27501	-4.65528	-3.90288	-4.44162	-4.44411	-4.20167
Adcy5	-3.95035	-4.02159	-4.39914	-4.14772	-3.82261	-2.46947	-4.76184	1.56358	-3.91233	-2.02288	-4.11046	-1.70757	-3.85997	-4.65528	-3.90288	2.75805	-0.356646	-4.20167
Adcy6	-3.95035	-1.69967	-4.39914	3.36798	-2.23765	2.58736	-3.17688	1.27408	6.07494	3.86673	-4.11046	3.94587	-3.85997	2.00293	2.0744	-4.44162	-4.44411	-4.20167
Adcy7	6.64304	6.19636	7.71362	6.90281	5.92054	6.82285	6.60939	7.71037	5.22978	6.98555	6.69125	7.1466	7.6112	6.64106	7.61035	7.58732	6.24676	7.17717
Adcy8	3.10493	4.27761	-4.39914	-4.14772	0.264849	3.9782	3.82687	-4.21778	-3.91233	4.62715	1.09899	1.66166	5.42774	-1.84792	-3.90288	-2.85666	-4.44411	0.442189
Adcy9	3.71499	2.20723	-2.81418	4.12374	3.45351	5.76415	1.77732	6.22827	7.93747	5.53061	6.50517	4.73905	4.9506	5.06411	-0.202439	6.50016	6.65063	4.50914
Adcyap1	-3.95035	-4.02159	-4.39914	-4.14772	-3.82261	-5.27683	3.23251	-4.21778	-3.91233	-4.83023	-4.11046	-4.8775	-3.85997	-4.65528	-3.90288	-4.44162	-4.44411	-4.20167
Adcyap1r1	-3.95035	-4.02159	-4.39914	-4.14772	-3.82261	-5.27683	-4.76184	-4.21778	-3.91233	-4.83023	-4.11046	-4.8775	-3.85997	-4.65528	-3.90288	-4.44162	-4.44411	-4.20167
Add1	6.6781	6.80575	7.0224	7.47112	6.77264	7.11522	6.18872	7.67969	7.1504	6.35897	7.18703	6.32033	7.76802	7.00338	4.64015	8.96923	0.600286	6.74889
Add2	-3.95035	-4.02159	-4.39914	-4.14772	-3.82261	-5.27683	-4.76184	0.305786	-3.91233	-4.83023	-4.11046	-4.8775	-3.85997	-3.07032	-3.90288	-4.44162	-4.44411	-4.20167
Add3	5.51113	4.49016	6.38468	4.89394	4.98796	5.15884	3.07736	7.11146	4.16982	5.47697	3.83791	4.98514	4.57882	6.20968	5.74278	4.73081	3.97796	5.72463
Adgb	-3.95035	-4.02159	-4.39914	-4.14772	0.264849	1.06302	-4.76184	-4.21778	-3.91233	-4.83023	-2.5255	-4.8775	3.84739	-4.65528	-3.90288	-4.44162	-4.44411	-4.20167
Adh1	-3.95035	-4.02159	-4.39914	-4.14772	-3.82261	-5.27683	-4.76184	-4.21778	-3.91233	-4.83023	-4.11046	-4.8775	-3.85997	-4.65528	-3.90288	-4.44162	-4.44411	-4.20167
Adh4	-3.95035	-4.02159	-4.39914	-4.14772	-3.82261	-5.27683	-4.76184	-4.21778	-3.91233	-4.83023	-4.11046	-4.8775	-3.85997	-4.65528	-3.90288	-4.44162	-4.44411	-4.20167
Adh5	7.95391	4.47426	4.35908	3.38366	3.96529	4.53214	3.06471	3.34447	5.33323	2.18099	4.76912	4.46013	4.36403	6.1609	1.82504	5.46977	4.69288	1.15588
Adh6a	-3.95035	-4.02159	-4.39914	-4.14772	-3.82261	-5.27683	-4.76184	-4.21778	-3.91233	-4.83023	-4.11046	-4.8775	-3.85997	-4.65528	-3.90288	-4.44162	-4.44411	-4.20167
Adh6-ps1	-3.95035	-4.02159	-4.39914	-4.14772	-3.82261	-5.27683	-4.76184	-4.21778	-3.91233	-4.83023	-4.11046	-4.8775	-3.85997	-4.65528	-3.90288	-4.44162	-4.44411	-4.20167
Adh7	-3.95035	-4.02159	-4.39914	-4.14772	-3.82261	-5.27683	-4.76184	-4.21778	-3.91233	-4.83023	-4.11046	-4.8775	-3.85997	-4.65528	-3.90288	-4.44162	-4.44411	-4.20167
Adhfe1	4.4028	2.4862	5.33726	1.20983	-1.01526	3.47472	4.40055	4.84022	1.44523	4.82976	7.3037	6.255	5.41848	1.61151	-1.58095	4.73081	3.77989	8.24722
Adi1	6.70697	0.501968	6.0897	4.75616	3.09625	5.7309	6.16223	6.65028	4.05922	6.04398	5.66268	4.69804	3.03485	5.13099	5.92526	4.26919	8.84346	4.767
Adig	-2.36539	-4.02159	-4.39914	-4.14772	-3.82261	-5.27683	4.93686	-4.21778	-3.91233	-4.83023	-4.11046	-4.8775	-3.85997	-4.65528	-3.90288	-4.44162	-4.44411	-4.20167
Adipoq	-3.95035	-4.02159	-4.39914	-4.14772	-3.82261	-5.27683	-4.76184	-4.21778	-3.91233	-4.83023	-4.11046	-4.8775	-3.85997	-4.65528	-3.90288	-4.44162	-4.44411	-4.20167
Adipor1	6.69261	4.59679	6.2017	7.39773	7.90233	5.78049	5.22258	3.28207	6.73603	6.93837	3.04941	6.90509	4.70608	6.07349	10.0596	5.70431	8.34604	7.84648
Adipor2	5.49052	5.56899	5.56809	7.38707	3.0722	5.07301	7.01253	6.30088	6.66227	5.84484	4.43257	5.3234	4.41149	5.11786	7.54265	5.25361	4.646	1.94808
Adk	-3.95035	-4.02159	-4.39914	0.607166	-3.82261	-3.69187	-4.76184	0.42608	1.29713	-3.24527	-4.11046	1.53189	-3.85997	3.30472	-3.90288	2.4532	-4.44411	-4.20167
Adm	-3.95035	-4.02159	-4.39914	-4.14772	-3.82261	-5.27683	-4.76184	-4.21778	-3.91233	-4.83023	-4.11046	-4.8775	-3.85997	-4.65528	-3.90288	-4.44162	-4.44411	-4.20167
Adm2	-3.95035	-4.02159	-4.39914	-4.14772	-3.82261	-5.27683	-4.76184	-4.21778	-3.91233	-4.83023	-4.11046	-4.8775	-3.85997	-4.65528	-3.90288	-4.44162	-4.44411	-4.20167
Adnp	7.31585	6.38248	7.64764	7.52515	9.34371	7.50187	7.39519	7.31604	7.84715	7.92986	8.6542	8.08666	5.49538	7.81054	6.30047	7.82897	6.67028	8.39382
[truncated: 20,431 more rows]
