# Supplementary material for: Microglial cannabinoid receptor type 1 mediates social memory deficits in mice produced by adolescent THC exposure and 16p11.2 duplication
Source: Nat Commun. 2023 Oct 25;14:6559. doi: 10.1038/s41467-023-42276-5 (PMC10600150; doi:10.1038/s41467-023-42276-5)
Supplement: Supplementary file 4 — Supplementary Data 2 [file 41467_2023_42276_MOESM4_ESM.xlsx]

## Sheet: WT-THC vs WT-Veh
Supplementary Data 2: Differential expression gene list
WT-THC vs WT-Veh
Gene name	logFC	AveExpr	t	two-tailed uncorrected P.Value	adj.P.Val	B
Usp53	6.17711	-2.965	7.31758	2.68e-06	0.0582531	-4.01021
Tub	5.35145	-2.00672	6.91453	5.19e-06	0.0582531	-4.24442
2023-03-02	-3.98477	3.11496	-4.93913	0.000183132	0.743998	-4.32236
Zbed5	-5.99493	-0.82247	-4.81793	0.000231699	0.743998	-4.41046
1700123M08Rik	4.42711	-3.06942	4.69853	0.000292601	0.743998	-4.14001
BC005624	-4.59138	4.18849	-4.65434	0.000319126	0.743998	-4.21476
F8	4.18969	-3.10715	4.42682	0.000500513	0.743998	-4.15637
Hexb	0.485415	12.7952	4.13737	0.000893577	0.743998	-1.85598
Mier1	-2.75039	5.03044	-4.09884	0.000965757	0.743998	-4.11382
Socs1	5.05406	-3.19947	4.08462	0.000993863	0.743998	-4.17057
Nrbp1	2.41742	6.19682	4.07504	0.00101328	0.743998	-3.77754
Nup37	4.78907	-1.87946	4.05914	0.00104633	0.743998	-4.37789
Herc2	-0.832131	8.66535	-3.97993	0.00122817	0.743998	-2.27435
Seh1l	-3.80831	5.00428	-3.92362	0.00137665	0.743998	-4.14249
Mphosph6	-5.60376	0.868638	-3.90026	0.0014435	0.743998	-4.45178
Armcx6	3.92684	-3.22815	3.89774	0.0014509	0.743998	-4.18599
Prss36	5.90551	-1.4421	3.89729	0.00145223	0.743998	-4.41962
Srsf2	1.03843	8.71163	3.89686	0.0014535	0.743998	-2.30182
9930111J21Rik1	1.47208	7.82725	3.8228	0.00168954	0.743998	-3.02739
Vamp4	-2.08536	5.09325	-3.80877	0.00173849	0.743998	-4.14025
Toporsos	-5.61311	0.438192	-3.70049	0.00216747	0.743998	-4.4628
Tatdn2	-3.41886	2.50176	-3.61657	0.0025722	0.743998	-4.42837
Dennd5b	5.38699	-2.19576	3.6103	0.00260537	0.743998	-4.37676
Znfx1	-1.11287	7.06171	-3.55234	0.00293268	0.743998	-3.57751
Polr1c	5.70128	1.64105	3.53508	0.00303792	0.743998	-4.45728
Msantd2	3.41819	4.06462	3.53495	0.00303876	0.743998	-4.3284
Unc45a	5.09695	-1.44397	3.52447	0.0031045	0.743998	-4.43968
Hmbs	-5.52112	-0.318682	-3.50603	0.00322371	0.743998	-4.46981
Arhgap1	-2.76939	4.95699	-3.49206	0.00331707	0.743998	-4.2117
Daxx	5.33817	2.38889	3.48536	0.00336279	0.743998	-4.44007
Myo1e	4.71644	1.89069	3.44587	0.00364541	0.743998	-4.45651
Nphp1	-5.9421	-1.74116	-3.4195	0.00384719	0.743998	-4.42853
1810013L24Rik	1.97342	6.08803	3.41677	0.00386871	0.743998	-3.97263
Batf2	2.53256	-3.14607	3.41101	0.00391456	0.743998	-4.26485
0610031J06Rik	2.06225	6.49816	3.36163	0.00433011	0.743998	-3.8627
Cep85	4.92938	0.817251	3.35886	0.00435469	0.743998	-4.47645
Ggact	4.57352	-1.26792	3.34693	0.00446214	0.743998	-4.45808
Ythdf3	-1.51347	7.1265	-3.33533	0.00456917	0.743998	-3.63803
Zfp787	-5.51881	0.275469	-3.33317	0.00458933	0.743998	-4.47963
Phlpp2	-2.39657	4.78317	-3.33257	0.00459496	0.743998	-4.26188
Rps21	1.73839	6.16302	3.32265	0.00468902	0.743998	-3.97591
Rps2	-1.7879	6.8326	-3.31234	0.00478888	0.743998	-3.76269
Tirap	-4.24004	3.63537	-3.29862	0.00492498	0.743998	-4.3882
H2-L	3.56701	-3.25567	3.24592	0.00548442	0.743998	-4.26719
Ubap1l	3.49757	-3.73716	3.24271	0.00552043	0.743998	-4.15951
Agl	-3.45614	3.78755	-3.24165	0.00553235	0.743998	-4.38172
2310033P09Rik	-4.68368	2.94725	-3.24064	0.00554378	0.743998	-4.43327
Oxsm	6.45006	0.436377	3.23457	0.00561293	0.743998	-4.48411
Frat1	4.1951	-1.65392	3.2298	0.00566776	0.743998	-4.44623
Slc17a5	3.84982	3.28517	3.22629	0.00570855	0.743998	-4.41695
Slc7a1	5.97439	0.695983	3.22162	0.00576314	0.743998	-4.48378
Selt	1.18543	7.16847	3.21265	0.00586956	0.743998	-3.67375
Pak1ip1	3.84051	2.45581	3.20688	0.00593906	0.743998	-4.45454
Atox1	-3.88164	3.61259	-3.20488	0.00596336	0.743998	-4.39801
Cd63	-1.37491	6.85915	-3.19576	0.00607534	0.743998	-3.79673
Micu2	-4.53118	3.59837	-3.19307	0.00610872	0.743998	-4.40003
Tmtc3	-2.16433	5.02496	-3.17251	0.00637027	0.743998	-4.24929
BC029722	5.98616	0.305143	3.17084	0.00639201	0.743998	-4.48737
Acvr2a	1.56051	5.61194	3.17069	0.00639398	0.743998	-4.1447
Rnf180	-2.56544	5.51351	-3.1703	0.00639897	0.743998	-4.16447
Dna2	3.60151	-2.63959	3.16874	0.0064194	0.743998	-4.36756
Mtbp	5.54259	2.00072	3.16243	0.00650245	0.743998	-4.46954
Ergic1	-2.35867	5.87997	-3.15593	0.00658924	0.743998	-4.08993
Rxfp4	-4.11526	-3.05698	-3.14265	0.00676992	0.743998	-4.31495
Kif21a	3.24673	-2.65607	3.13439	0.00688476	0.743998	-4.36926
Dido1	1.21522	7.851	3.11416	0.00717432	0.743998	-3.42634
Hif1an	4.87152	1.61339	3.11294	0.00719218	0.743998	-4.47971
Top2a	6.01531	-0.998596	3.11289	0.00719286	0.743998	-4.48
Lypd6	4.38479	-1.50622	3.11163	0.0072114	0.743998	-4.46124
Zfp668	4.57431	1.21896	3.10929	0.00724578	0.743998	-4.48518
3300002I08Rik	4.06484	-2.38956	3.09294	0.00749095	0.743998	-4.40117
Prkg1	5.29697	-2.16809	3.08383	0.00763104	0.743998	-4.42133
Fam117b	-1.29421	7.70381	-3.0833	0.00763925	0.743998	-3.51226
Zcchc7	1.51247	6.98854	3.08165	0.00766494	0.743998	-3.79655
4933427D14Rik	3.36043	1.56634	3.07245	0.0078097	0.743998	-4.48262
Gm17644	-2.31059	-3.07792	-3.0696	0.00785516	0.743998	-4.32145
Gsdmcl-ps	4.24205	-1.85349	3.06301	0.00796117	0.743998	-4.44559
Vprbp	-2.70469	4.64312	-3.05703	0.00805842	0.743998	-4.31839
Saysd1	4.61154	0.889529	3.05623	0.0080716	0.743998	-4.49081
Rab3d	3.5769	-3.4515	3.05554	0.00808287	0.743998	-4.25922
Gm5595	3.69168	1.08149	3.04823	0.00820392	0.743998	-4.4897
Rps24	-0.869469	7.49389	-3.04642	0.00823417	0.743998	-3.62202
Tsr2	-4.9338	-0.882992	-3.04246	0.00830058	0.743998	-4.48634
Foxn3	-2.51221	6.61926	-3.02588	0.00858493	0.743998	-3.93545
Stx12	-3.02202	4.4294	-3.02191	0.00865451	0.743998	-4.34684
Mau2	-2.74633	5.8103	-3.01348	0.00880376	0.743998	-4.13896
Cdk1	4.59799	-2.8313	3.00867	0.00889022	0.743998	-4.36251
Ercc6	3.91222	4.02459	3.00381	0.00897827	0.743998	-4.3863
Ap2a2	2.34359	5.8148	3.00111	0.00902759	0.743998	-4.14097
Pabpn1	-3.4636	4.56143	-3.00091	0.00903124	0.743998	-4.33536
Lysmd3	3.41459	2.79393	2.99691	0.00910495	0.743998	-4.45669
Cdk4	-4.20736	4.32219	-2.99652	0.00911218	0.743998	-4.3607
Map1b	-3.15319	1.09278	-2.98898	0.0092525	0.743998	-4.49266
Tsg101	2.11318	4.54478	2.98501	0.00932737	0.743998	-4.33929
Usp16	-2.0426	5.51292	-2.97212	0.00957428	0.743998	-4.20493
Rgs19	-1.43603	7.14705	-2.9716	0.00958445	0.743998	-3.78881
Ears2	-4.0023	-2.45704	-2.966	0.00969388	0.743998	-4.40696
Nhsl2	-1.8868	5.6849	-2.96367	0.00973969	0.743998	-4.17527
Lmbrd1	1.41674	6.09671	2.95721	0.00986803	0.743998	-4.09136
Abracl	2.72876	2.2762	2.95555	0.00990119	0.743998	-4.47531
Dnaja3	-4.32342	1.36928	-2.95474	0.0099174	0.743998	-4.4916
Anxa6	-2.74769	3.91094	-2.9525	0.00996264	0.743998	-4.40048
Mmp24	4.00035	-2.05678	2.94637	0.0100869	0.743998	-4.44094
Atp8a1	0.730681	8.71664	2.93859	0.0102472	0.743998	-3.13886
Rala	-2.02001	5.02821	-2.93553	0.0103109	0.743998	-4.28734
Cdc7	4.1606	-1.61418	2.93443	0.0103337	0.743998	-4.46778
Fam102a	4.35913	1.8773	2.92618	0.0105078	0.743998	-4.48564
Capn10	-5.35661	-1.16831	-2.92365	0.0105617	0.743998	-4.48571
Stom	-5.52571	-1.49953	-2.90094	0.0110579	0.743998	-4.475
Rsph4a	3.88071	-1.95158	2.8953	0.0111847	0.743998	-4.45198
Alpk1	-5.19648	0.962751	-2.88548	0.0114088	0.743998	-4.49909
AI597479	5.46662	1.88544	2.88506	0.0114186	0.743998	-4.48789
Trim65	-2.26339	6.08912	-2.88333	0.0114584	0.743998	-4.11326
Wdr1	1.61663	6.24766	2.87994	0.0115372	0.743998	-4.07888
Prpf38b	-0.93811	7.88188	-2.87737	0.0115973	0.743998	-3.56099
Ganc	-2.52413	4.92164	-2.87544	0.0116425	0.743998	-4.31105
Ppp2r4	-2.31903	4.91827	-2.87349	0.0116884	0.743998	-4.31178
Ndfip1	-2.06195	4.25414	-2.87222	0.0117184	0.743998	-4.38177
Esco1	-1.5798	5.85022	-2.87096	0.0117483	0.743998	-4.16533
Ubap2l	1.11789	8.13728	2.86943	0.0117847	0.743998	-3.45942
Gpr137b-ps	-1.63285	5.18462	-2.86479	0.0118954	0.743998	-4.27773
Atp6v1g1	-1.81484	5.59382	-2.86408	0.0119125	0.743998	-4.21373
1110006O24Rik	4.55218	-0.952762	2.86388	0.0119173	0.743998	-4.49463
Cox6c	4.46701	2.94886	2.85949	0.0120232	0.743998	-4.46084
Klhl23	-2.43937	2.79153	-2.85926	0.0120288	0.743998	-4.46653
Apc	1.07416	8.42601	2.85907	0.0120334	0.743998	-3.34132
Alg1	4.52018	4.18544	2.84737	0.0123207	0.743998	-4.39049
Mcc	3.77172	-1.52762	2.82965	0.0127685	0.743998	-4.47851
Pten	-0.675035	8.90192	-2.82961	0.0127697	0.743998	-3.1587
Rab6b	-2.20487	7.44474	-2.82031	0.0130109	0.743998	-3.75893
Mccc1os	2.88883	-3.41683	2.81828	0.0130643	0.743998	-4.30544
Fam107a	4.94738	-1.82126	2.81787	0.013075	0.743998	-4.46549
Pgm1	-3.40142	3.50074	-2.81377	0.0131834	0.743998	-4.43961
Gm9079	3.06553	-3.23217	2.81208	0.0132283	0.743998	-4.33534
Zbtb41	-4.59391	3.13942	-2.81056	0.0132689	0.743998	-4.45698
Unc13a	-5.5934	-1.35894	-2.80832	0.0133288	0.743998	-4.48631
Tmem242	4.52946	-1.25626	2.80649	0.013378	0.743998	-4.48993
Ndufb8	-3.70631	2.88821	-2.80373	0.0134524	0.743998	-4.46722
Ehf	4.5148	-3.2216	2.80361	0.0134558	0.743998	-4.33815
4632434I11Rik	4.88196	-2.6256	2.80345	0.0134601	0.743998	-4.40798
Hipk2	2.21923	5.64389	2.80085	0.0135307	0.743998	-4.21917
Abcf1	-2.18423	5.16766	-2.79762	0.0136187	0.743998	-4.29214
Rfk	4.66101	2.2862	2.79759	0.0136195	0.743998	-4.48503
Kpna2	-3.29345	4.05006	-2.79654	0.0136483	0.743998	-4.40676
1110007C09Rik	-3.86455	2.93429	-2.79643	0.0136514	0.743998	-4.46611
Stard3	-2.29814	5.5649	-2.79506	0.013689	0.743998	-4.23355
Nr2c2	-2.00929	6.82788	-2.79428	0.0137106	0.743998	-3.96189
Plxdc1	-2.50424	5.24945	-2.79115	0.013797	0.743998	-4.28208
Srebf1	-2.66862	2.69031	-2.78969	0.0138377	0.743998	-4.47476
Gm11545	6.39697	-0.759141	2.78859	0.0138683	0.743998	-4.50194
Csf1r	0.280169	12.7849	2.78219	0.0140478	0.743998	-4.58181
Wdr74	5.36855	2.1894	2.78101	0.014081	0.743998	-4.48822
Rps27l	-4.18107	3.38222	-2.77994	0.0141114	0.743998	-4.44857
Mrpl20	-3.34424	1.67257	-2.77792	0.0141687	0.743998	-4.49748
Lgi4	4.71044	-1.20623	2.7758	0.0142292	0.743998	-4.49329
Sdr42e1	4.24024	-2.3623	2.7738	0.0142865	0.743998	-4.43365
Polr1a	-1.81404	5.51012	-2.77286	0.0143134	0.743998	-4.24706
Foxo4	-4.95449	0.541011	-2.77125	0.0143597	0.743998	-4.50706
Ccdc166	-4.02132	-3.04389	-2.76901	0.0144244	0.743998	-4.36687
Cad	-4.154	1.98814	-2.76464	0.0145517	0.743998	-4.49319
Lgr4	4.44008	-1.13504	2.75515	0.0148314	0.743998	-4.49655
Egr2	3.24315	-2.78315	2.75264	0.014906	0.743998	-4.3983
Pcdhga12	-4.52523	1.35173	-2.74714	0.0150714	0.743998	-4.50311
Rtn4ip1	-4.92751	0.357834	-2.74427	0.0151584	0.743998	-4.50879
Zdhhc21	-2.30949	4.53117	-2.73228	0.015527	0.743998	-4.37459
Cck	3.94635	-3.21824	2.72811	0.0156572	0.743998	-4.35006
D730005E14Rik	5.37636	1.1521	2.72532	0.0157451	0.743998	-4.50616
Slc22a17	-3.21754	3.88275	-2.72092	0.0158843	0.743998	-4.42633
Eno2	2.60354	-3.49109	2.71375	0.0161139	0.743998	-4.3112
Grpel1	4.61836	1.99182	2.71161	0.016183	0.743998	-4.49635
Tm9sf3	0.913682	7.72557	2.70976	0.016243	0.743998	-3.72341
1700008J07Rik	4.18605	0.501632	2.70809	0.0162974	0.743998	-4.51044
Scap	-2.32069	4.76171	-2.70808	0.0162977	0.743998	-4.3553
R3hdm4	3.03077	5.16555	2.70572	0.0163747	0.743998	-4.30901
Zfp518b	4.78416	2.07299	2.70388	0.0164349	0.743998	-4.49536
Pim1	4.63325	-2.22554	2.70374	0.0164397	0.743998	-4.45012
1700001C19Rik	3.92698	-2.2353	2.70331	0.0164539	0.743998	-4.44949
P2rx7	0.885935	8.1463	2.70025	0.0165549	0.743998	-3.57749
Pgrmc2	3.1346	4.13986	2.69961	0.016576	0.743998	-4.41113
Stra8	2.10539	-3.63489	2.69263	0.0168087	0.743998	-4.29002
Tacc3	4.45313	-2.10089	2.6895	0.0169141	0.743998	-4.45944
Zfp961	4.20827	2.89125	2.68725	0.0169905	0.743998	-4.47581
9930111J21Rik2	-3.22516	5.23346	-2.68635	0.0170209	0.743998	-4.30385
Bivm	3.45873	3.1222	2.68183	0.0171751	0.743998	-4.46798
Zbtb8os	-4.76232	-0.698283	-2.68126	0.017195	0.743998	-4.50841
Scrn2	2.91935	-3.41223	2.68109	0.0172005	0.743998	-4.32951
Mbnl2	1.14293	6.98539	2.67819	0.0173004	0.743998	-3.9667
A730020M07Rik	-3.80293	-3.2477	-2.67207	0.0175131	0.743998	-4.35466
Xcr1	1.95797	-3.52164	2.67137	0.0175376	0.743998	-4.31379
Ggn	-5.17707	-1.07961	-2.66973	0.0175952	0.743998	-4.50301
Gm14137	3.53248	-3.14048	2.66817	0.0176501	0.743998	-4.36916
Gemin6	5.365	-0.466537	2.667	0.0176912	0.743998	-4.51088
M1ap	-2.42881	-2.30744	-2.66618	0.0177201	0.743998	-4.44793
Fahd2a	4.12521	-2.17662	2.659	0.0179755	0.743998	-4.45736
BC030336	-2.39181	4.03267	-2.6587	0.0179865	0.743998	-4.42325
Asun	5.04211	1.54825	2.65849	0.0179938	0.743998	-4.50593
Cuta	-3.51718	4.65298	-2.65842	0.0179966	0.743998	-4.37345
Cbll1	1.61209	5.38928	2.65807	0.0180089	0.743998	-4.28851
Cnep1r1	1.91577	5.87286	2.65484	0.0181254	0.743998	-4.21516
Rspry1	-2.61784	3.58133	-2.65016	0.018295	0.743998	-4.45045
Gm16287	1.89256	-3.69698	2.64977	0.0183094	0.743998	-4.28712
Ttc7	1.70564	6.23668	2.64883	0.0183437	0.743998	-4.15024
Nup107	-4.6758	0.207059	-2.64839	0.0183595	0.743998	-4.51386
LOC100861615	2.34711	-2.72707	2.64675	0.0184198	0.743998	-4.41624
D5Ertd605e	4.96563	-2.29817	2.64484	0.0184901	0.743998	-4.45059
1110059G10Rik	-4.33684	3.18474	-2.64114	0.0186267	0.743998	-4.46886
Nsmce4a	3.94507	2.35215	2.63976	0.0186778	0.743998	-4.49378
Pdk3	4.553	1.00311	2.63724	0.0187719	0.743998	-4.51203
Tspan7	-2.66477	4.54931	-2.63658	0.0187965	0.743998	-4.38606
G3bp2	2.00728	7.42816	2.63328	0.0189202	0.743998	-3.86225
Slmo1	-5.12199	-1.3584	-2.62604	0.0191948	0.743998	-4.49787
Hdac10	-5.12101	2.81861	-2.62588	0.0192008	0.743998	-4.48266
Pnn	-0.83911	7.88915	-2.62504	0.0192331	0.743998	-3.72034
BC028528	2.8307	1.16872	2.62362	0.0192874	0.743998	-4.51158
Suds3	4.30757	2.93176	2.62146	0.0193704	0.743998	-4.47946
Ap3s1	3.80906	1.15001	2.62141	0.0193724	0.743998	-4.51184
Mylip	1.60872	7.069	2.6208	0.019396	0.743998	-3.96945
Rims1	3.23037	-3.45403	2.62066	0.0194013	0.743998	-4.33361
Zzz3	-0.81149	6.21918	-2.61579	0.0195897	0.743998	-4.16353
Snrpg	-2.5378	3.51065	-2.61236	0.0197237	0.743998	-4.4574
Gla	5.13109	-1.67462	2.61196	0.0197397	0.743998	-4.48755
Tbc1d22a	-1.56754	5.86202	-2.60925	0.0198461	0.743998	-4.2285
Tmem71	3.95988	3.22069	2.60863	0.0198703	0.743998	-4.47015
Zgrf1	5.7038	0.232541	2.60344	0.0200764	0.743998	-4.51622
Dbr1	3.71278	0.382307	2.60226	0.0201236	0.743998	-4.5162
Nup153	1.11067	6.10062	2.60121	0.0201656	0.743998	-4.18972
Acsl1	2.20053	5.47943	2.60062	0.020189	0.743998	-4.28801
Ap4s1	4.29768	1.82757	2.60052	0.0201929	0.743998	-4.50568
Kin	5.07141	3.05224	2.59982	0.020221	0.743998	-4.47709
Alyref2	4.25604	-0.623799	2.59916	0.0202475	0.743998	-4.51349
Plcxd2	3.47902	-2.6304	2.5954	0.0203991	0.743998	-4.43053
Lrig2	-2.28712	5.50657	-2.59456	0.0204333	0.743998	-4.28556
Cntn3	2.37029	-3.72206	2.59065	0.0205925	0.743998	-4.29469
Hdac9	4.2407	1.99122	2.59056	0.0205961	0.743998	-4.50378
Casp4	3.89154	2.82136	2.58999	0.0206192	0.743998	-4.48524
Clp1	-4.76215	0.789967	-2.58993	0.0206218	0.743998	-4.51573
Lin37	-5.21493	1.4809	-2.58304	0.0209056	0.743998	-4.511
Polr3k	4.60159	2.70739	2.58112	0.0209852	0.743998	-4.48913
Nelfb	-2.82326	4.24485	-2.58061	0.0210064	0.743998	-4.41765
Apopt1	3.74741	2.61311	2.57742	0.0211396	0.743998	-4.49185
Atrx	0.62352	8.7033	2.57435	0.0212684	0.743998	-3.47837
Unc5d	3.12077	-3.81764	2.57176	0.0213778	0.743998	-4.28077
Pank3	-1.82863	6.27301	-2.57075	0.0214208	0.743998	-4.16699
Cela1	2.92939	-3.54139	2.57026	0.0214414	0.743998	-4.32928
Fam126a	3.54134	4.56576	2.56778	0.021547	0.743998	-4.3942
Nudcd1	-3.80187	1.69778	-2.56461	0.0216827	0.743998	-4.50955
S100a11	-2.84801	-1.45967	-2.56404	0.0217069	0.743998	-4.49864
Alox5ap	-0.981893	7.45375	-2.56316	0.0217448	0.743998	-3.89179
Igbp1	-4.89828	3.45631	-2.55692	0.0220151	0.743998	-4.46492
Zfp354b	4.92346	-1.17802	2.55336	0.0221707	0.743998	-4.5075
Pvt1	4.49829	2.52456	2.55239	0.0222129	0.743998	-4.49576
Pms1	3.96137	-1.24453	2.54971	0.0223313	0.743998	-4.50603
Itpkb	3.02882	4.13382	2.54768	0.022421	0.743998	-4.42922
Slmap	1.00194	6.96005	2.54719	0.0224424	0.743998	-4.02882
Echs1	-4.36806	1.95262	-2.54521	0.0225305	0.743998	-4.50717
Nptxr	2.84579	-3.86004	2.5446	0.0225575	0.743998	-4.27929
Ccdc137	3.86459	2.9402	2.54438	0.0225676	0.743998	-4.48511
Eme1	3.11755	-1.44093	2.53947	0.0227876	0.743998	-4.50087
Ccar2	-4.05943	3.20379	-2.53585	0.022951	0.743998	-4.47687
Ilk	-1.09605	6.14245	-2.53061	0.0231894	0.743998	-4.20256
Csnk2b	2.99485	4.26624	2.52866	0.0232788	0.743998	-4.42252
Ift43	3.44727	-3.05274	2.52796	0.0233114	0.743998	-4.39936
Pelp1	-4.49791	2.3559	-2.52737	0.0233384	0.743998	-4.50115
Yipf6	2.17042	6.00765	2.52702	0.0233544	0.743998	-4.22624
Scrn3	-4.91187	1.62903	-2.52639	0.0233833	0.743998	-4.51263
Zfp932	3.64947	1.68672	2.52388	0.0234996	0.743998	-4.51208
Zfp518a	1.5739	6.65916	2.52314	0.0235337	0.743998	-4.106
Zmynd10	2.64221	-3.89144	2.52119	0.0236248	0.743998	-4.27903
Trim39	3.36991	3.9618	2.52071	0.0236469	0.743998	-4.44291
Rras2	-4.31609	1.75934	-2.52059	0.0236526	0.743998	-4.51137
Sypl	-1.20877	5.67592	-2.5193	0.0237126	0.743998	-4.27868
G6pdx	-2.90153	6.03769	-2.51809	0.0237693	0.743998	-4.22377
Hspa1a	2.68675	-3.432	2.5167	0.0238345	0.743998	-4.35508
Usp54	4.37656	3.09975	2.51524	0.0239031	0.743998	-4.48224
Lrrtm3	2.7236	-3.52832	2.51427	0.0239491	0.743998	-4.3417
Lamtor3	-3.30806	4.38405	-2.50773	0.0242596	0.743998	-4.41672
Fbxw10	5.67165	-0.13245	2.50439	0.0244197	0.743998	-4.52096
Guf1	-3.61488	3.04001	-2.50363	0.0244564	0.743998	-4.48514
Gm3264	2.80993	-0.175947	2.50094	0.0245861	0.743998	-4.52104
Ubap2	3.83856	3.49053	2.50066	0.0245995	0.743998	-4.46858
Rer1	2.18054	5.75957	2.50066	0.0245996	0.743998	-4.27116
Mkl1	-2.34052	4.89288	-2.49373	0.0249375	0.743998	-4.37576
Cdo1	-3.81955	-3.07556	-2.49095	0.0250742	0.743998	-4.40221
Ecm1	2.5655	-3.46371	2.49036	0.0251033	0.743998	-4.35534
4930426L09Rik	3.68571	-2.01369	2.4876	0.0252397	0.743998	-4.48138
Arfgef2	2.84356	4.83001	2.48744	0.025248	0.743998	-4.38269
1110012L19Rik	4.76007	-0.597854	2.48739	0.0252501	0.743998	-4.5198
Rbm38	-3.6552	1.98095	-2.48713	0.025263	0.743998	-4.51033
Bcr	5.37052	1.03345	2.48068	0.0255854	0.743998	-4.52037
Psd	3.51343	-2.47384	2.47753	0.0257441	0.743998	-4.45508
Rpgrip1l	3.89428	2.87129	2.47698	0.0257721	0.743998	-4.49231
Gm15612	-5.49932	0.0954146	-2.47663	0.0257899	0.743998	-4.52286
Rexo2	-2.79307	4.29656	-2.47642	0.0258006	0.743998	-4.42693
Rad18	-4.9709	-1.92103	-2.4746	0.025893	0.743998	-4.48698
Mpv17	-3.45106	4.04521	-2.47325	0.0259616	0.743998	-4.4433
Zfp157	2.61033	4.40902	2.47098	0.0260774	0.743998	-4.4197
Bad	5.90463	1.17244	2.47073	0.0260905	0.743998	-4.52
Drg2	-3.12815	2.43545	-2.46959	0.0261485	0.743998	-4.50342
Ly6k	2.32738	-3.57093	2.46844	0.0262077	0.743998	-4.344
2700097O09Rik	-4.278	-0.314663	-2.46807	0.0262267	0.743998	-4.52232
Cdh10	2.36322	-3.93095	2.46715	0.0262743	0.743998	-4.28588
Dimt1	-2.4291	3.57824	-2.46711	0.0262765	0.743998	-4.4679
Itpr2	0.865715	8.29207	2.46338	0.0264694	0.743998	-3.70483
Cdk5rap1	4.4122	-0.33753	2.46049	0.0266199	0.743998	-4.52264
Ccdc8	2.32729	-3.93585	2.45853	0.0267222	0.743998	-4.2873
Eml6	3.67227	2.70628	2.45567	0.0268727	0.743998	-4.49825
Arrb2	0.901742	8.48982	2.45439	0.02694	0.743998	-3.65196
Bank1	-1.54513	7.18565	-2.45371	0.0269761	0.743998	-4.01663
Atg14	3.72401	2.3256	2.45221	0.0270551	0.743998	-4.50676
Brca2	3.56684	2.59975	2.45148	0.0270943	0.743998	-4.50108
2010009K17Rik	1.78532	-3.82681	2.44844	0.0272561	0.743998	-4.30672
Asb8	-3.1836	4.58736	-2.44822	0.0272678	0.743998	-4.40931
Gm2518	-4.9384	-0.465706	-2.4477	0.0272953	0.743998	-4.52275
Dctd	4.75023	-1.57131	2.44745	0.0273088	0.743998	-4.50292
Bcl11a	3.64672	-1.9384	2.44633	0.0273689	0.743998	-4.48844
Rbm44	4.08052	-2.83763	2.44629	0.0273707	0.743998	-4.43074
Arhgap26	2.9201	0.573509	2.44544	0.0274163	0.743998	-4.5242
Rnft1	2.19612	3.78964	2.44491	0.0274452	0.743998	-4.4602
Hk3	-1.69817	6.04815	-2.4446	0.0274616	0.743998	-4.24246
Nfatc2ip	4.79761	1.376	2.44122	0.0276438	0.743998	-4.52007
Zfp664	3.48601	4.4476	2.4394	0.0277427	0.743998	-4.42109
Ccdc69	2.26051	-3.69782	2.43931	0.0277474	0.743998	-4.33026
Tfdp2	4.07485	2.64467	2.43639	0.0279063	0.743998	-4.50113
Cog6	-2.63211	3.89828	-2.42948	0.0282863	0.743998	-4.4563
Usp45	2.38391	5.52186	2.42806	0.0283647	0.743998	-4.31954
Cntnap1	-3.88644	-1.69611	-2.42718	0.0284134	0.743998	-4.50009
Zbed3	3.47295	3.23886	2.42601	0.0284789	0.743998	-4.48488
Dtx3	1.53366	5.09212	2.42448	0.0285642	0.743998	-4.36804
Esyt3	-3.3774	-2.64197	-2.42312	0.0286402	0.743998	-4.44904
Raver1-fdx1l	4.36717	2.32662	2.42188	0.0287096	0.743998	-4.50876
Ap4b1	-2.42441	2.8346	-2.42086	0.0287668	0.743998	-4.49755
Uros	5.1387	0.805764	2.42054	0.0287846	0.743998	-4.52478
Naa16	2.5899	4.7993	2.41997	0.0288167	0.743998	-4.39604
Cdc42bpa	1.46555	5.37691	2.41938	0.0288498	0.743998	-4.33851
Tada1	4.18899	1.96185	2.41763	0.0289486	0.743998	-4.51491
Oxct1	0.574603	6.92529	2.4168	0.0289957	0.743998	-4.09153
Mri1	4.22109	-0.24197	2.4149	0.0291033	0.743998	-4.52546
Tbc1d17	-2.92917	5.18168	-2.41304	0.0292096	0.743998	-4.36099
Colgalt2	3.3555	-3.5967	2.41048	0.0293553	0.743998	-4.35139
Vps8	3.08929	3.91822	2.40951	0.0294111	0.743998	-4.45741
Paip2	-1.65832	6.04157	-2.40895	0.0294434	0.743998	-4.25337
Ankrd37	4.44624	-2.35392	2.40881	0.0294514	0.743998	-4.46975
Ssr2	2.95958	3.65525	2.4056	0.0296365	0.743998	-4.47043
Itga5	4.21677	2.05024	2.40441	0.0297055	0.743998	-4.51448
Zfp91	-1.39443	6.54396	-2.4022	0.0298335	0.743998	-4.1721
Bub3	3.89252	4.01792	2.40081	0.0299146	0.743998	-4.45303
Alkbh5	1.73547	5.0742	2.40041	0.029938	0.743998	-4.37409
Hjurp	-2.9923	3.66959	-2.40037	0.0299404	0.743998	-4.47031
Optn	2.91028	-3.41286	2.39959	0.0299857	0.743998	-4.37805
Rpl8	1.42423	6.38133	2.39713	0.0301297	0.743998	-4.20245
4933400F21Rik	3.80187	-0.75965	2.39577	0.0302097	0.743998	-4.52369
Bcor	1.26586	6.18042	2.39464	0.0302762	0.743998	-4.23611
Zfp934	4.8298	0.356997	2.39295	0.030376	0.743998	-4.52733
Nsmce2	2.72894	4.18749	2.39249	0.0304033	0.743998	-4.44426
Rrp8	-4.71058	1.447	-2.39155	0.030459	0.743998	-4.5223
Pdia5	4.30553	-0.149702	2.38934	0.0305905	0.743998	-4.52709
Wbscr16	-5.14889	-1.16311	-2.38882	0.0306215	0.743998	-4.51789
Pagr1a	-2.78154	4.86368	-2.38602	0.0307887	0.743998	-4.39587
Gm17066	-0.847665	6.80503	-2.38584	0.0307998	0.743998	-4.12868
Usp1	3.44647	2.27161	2.38566	0.0308102	0.743998	-4.51214
Ric8	2.37097	4.42539	2.38239	0.0310071	0.743998	-4.43027
Gabarap	-1.62819	6.28936	-2.38231	0.0310122	0.743998	-4.22246
St3gal2	2.17693	5.27629	2.37888	0.0312194	0.743998	-4.35762
Timm22	-5.18823	1.70565	-2.377	0.0313342	0.743998	-4.52057
Aptx	3.8445	3.3548	2.37687	0.0313419	0.743998	-4.48508
Prkar2a	4.30443	1.85784	2.37674	0.0313498	0.743998	-4.51881
Mdm4	-0.614694	7.4496	-2.37558	0.0314205	0.743998	-3.99255
Glrx5	4.31147	-0.960614	2.37466	0.0314769	0.743998	-4.52244
Tnfsf12	2.73401	4.38542	2.37302	0.0315775	0.743998	-4.4342
Pnma2	2.75056	-3.1189	2.37175	0.0316555	0.743998	-4.41508
Ccdc117	-2.25608	5.21767	-2.37118	0.0316907	0.743998	-4.36516
Rnf169	-1.31922	7.9024	-2.37058	0.0317275	0.743998	-3.88133
Gpr89	4.39716	-0.0916454	2.36916	0.0318148	0.743998	-4.52831
Fbxl4	-2.28057	4.53483	-2.36908	0.0318203	0.743998	-4.42441
Taf12	3.86534	2.69469	2.36873	0.0318419	0.743998	-4.50486
Map3k4	-3.31663	5.21714	-2.36703	0.0319473	0.743998	-4.366
2010204K13Rik	1.16859	-3.91487	2.36694	0.0319524	0.743998	-4.31161
B3gnt1	4.55048	1.35803	2.36573	0.0320277	0.743998	-4.52451
Prpf18	2.34739	3.52321	2.35891	0.0324545	0.743998	-4.48041
Dffb	-5.18636	-1.11614	-2.3587	0.032468	0.743998	-4.52072
Adamts13	-1.57245	-3.26977	-2.35504	0.0326993	0.743998	-4.4021
D330045A20Rik	-3.67048	-1.92968	-2.35482	0.0327132	0.743998	-4.49623
Ptbp3	0.70692	8.48598	2.3536	0.0327905	0.743998	-3.73697
Spp1	-3.11454	-3.26541	-2.3536	0.0327907	0.743998	-4.4028
Pja1	3.67354	2.66694	2.35266	0.0328506	0.743998	-4.50666
P2rx1	-4.41186	-2.07946	-2.35232	0.0328724	0.743998	-4.48965
Dars2	-4.33552	1.03619	-2.3519	0.0328989	0.743998	-4.52744
Galnt12	-3.39814	3.54418	-2.35167	0.0329139	0.743998	-4.48027
Dync1h1	-0.669193	8.97063	-2.3515	0.0329243	0.743998	-3.6141
Sez6l2	2.74117	-3.02043	2.35066	0.0329785	0.743998	-4.42734
Abhd17a	-4.236	1.54483	-2.34789	0.033156	0.743998	-4.52392
Rps6kb2	2.95965	3.01453	2.34781	0.0331612	0.743998	-4.49832
Gm20257	-4.43142	2.37926	-2.34665	0.0332356	0.743998	-4.51284
Crlf2	3.62902	0.834761	2.34236	0.0335129	0.743998	-4.52891
Dera	-4.09563	0.52705	-2.34165	0.0335592	0.743998	-4.52985
1700047A11Rik	1.91871	-3.99203	2.34158	0.0335635	0.743998	-4.30916
Malat1	0.214481	14.6633	2.34079	0.0336153	0.743998	-9.39833
Atad1	-1.50054	6.60578	-2.34061	0.0336267	0.743998	-4.18291
Tshz1	3.77071	2.79579	2.33839	0.0337717	0.743998	-4.50472
Brsk1	2.98433	-3.62488	2.33801	0.0337965	0.743998	-4.36162
Eif6	3.91449	2.86396	2.33692	0.0338681	0.743998	-4.50317
Cutc	3.10451	-2.44796	2.33668	0.0338835	0.743998	-4.47135
Icam1	1.44162	5.82885	2.336	0.0339287	0.743998	-4.30236
Ccdc57	3.58357	-2.5178	2.33577	0.0339437	0.743998	-4.46714
Socs6	2.2335	4.32829	2.33389	0.0340672	0.743998	-4.44292
Ttf2	3.89663	0.934279	2.33329	0.0341069	0.743998	-4.52897
N6amt2	-4.63516	-1.18837	-2.33283	0.0341374	0.743998	-4.52078
Hars	-4.2928	2.8918	-2.33089	0.0342654	0.743998	-4.50293
Zfp951	-4.94735	0.0814725	-2.33053	0.0342893	0.743998	-4.53064
Tfpt	4.70935	2.16116	2.33009	0.0343184	0.743998	-4.51754
Pqlc1	2.35923	-3.08901	2.3286	0.0344178	0.743998	-4.42422
Papd5	1.05066	6.61841	2.32824	0.0344415	0.743998	-4.18516
Clcf1	3.5996	-0.616571	2.32577	0.0346064	0.743998	-4.52861
Myo18a	-2.02542	5.39411	-2.32539	0.0346318	0.743998	-4.35585
Uprt	4.68156	-0.470068	2.32426	0.0347076	0.743998	-4.52948
Gm5475	1.86156	-4.00006	2.32277	0.0348077	0.743998	-4.3129
Tuba4a	3.67279	-2.02334	2.32188	0.0348677	0.743998	-4.49483
Raf1	2.09185	4.37781	2.32182	0.0348721	0.743998	-4.44138
Il6ra	0.598635	9.03671	2.32168	0.0348815	0.743998	-3.629
Faim	4.51227	2.35493	2.32057	0.0349565	0.743998	-4.51503
Ptpn4	2.20455	3.99842	2.32038	0.0349689	0.743998	-4.46309
Map10	-4.90822	1.51901	-2.32007	0.0349902	0.743998	-4.52578
Gstp2	-3.09304	0.011561	-2.31604	0.0352633	0.743998	-4.53134
Smg6	-1.45989	5.9678	-2.31232	0.0355175	0.743998	-4.29021
Col4a3bp	1.52471	4.98258	2.31023	0.0356613	0.743998	-4.39814
Eif2ak4	2.2124	4.59026	2.30808	0.0358095	0.743998	-4.42909
Impad1	-2.54701	3.80568	-2.30775	0.0358326	0.743998	-4.47363
Pdzd2	4.44534	-0.389336	2.30464	0.0360479	0.743998	-4.5309
Alms1-ps2	2.11973	-3.8841	2.30014	0.0363621	0.743998	-4.33167
Atg9a	-3.95126	3.09701	-2.298	0.0365126	0.743998	-4.50002
Stag1	-1.18021	7.2742	-2.29758	0.0365425	0.743998	-4.0717
1700084E18Rik	-3.22051	-3.1078	-2.29697	0.0365849	0.743998	-4.42709
Tpk1	4.63456	-0.939481	2.29681	0.0365963	0.743998	-4.52726
Tm9sf1	-1.65679	4.71343	-2.29666	0.0366067	0.743998	-4.42187
Sacs	3.18301	-3.21467	2.29596	0.0366567	0.743998	-4.4171
Map3k13	-3.9748	-2.78614	-2.29454	0.0367571	0.743998	-4.45367
St6galnac4	-1.9926	5.97743	-2.29326	0.0368473	0.743998	-4.29405
Stip1	3.80145	3.99259	2.29253	0.0368992	0.743998	-4.46649
Top3a	-4.3276	1.38395	-2.29133	0.0369845	0.743998	-4.52856
Hspa5	0.655794	9.40726	2.29102	0.0370071	0.743998	-3.5918
Cd37	-1.15571	8.32998	-2.29061	0.0370358	0.743998	-3.82782
Ankrd32	-3.48985	1.52591	-2.2905	0.0370439	0.743998	-4.52744
Zkscan4	4.88629	-0.575011	2.28657	0.037325	0.743998	-4.53102
Fignl1	-3.30093	-3.23347	-2.28635	0.0373412	0.743998	-4.41674
Amfr	-1.29148	6.73655	-2.28628	0.0373458	0.743998	-4.18014
Ripk1	-2.99939	3.72974	-2.27951	0.0378354	0.743998	-4.47979
Pstpip2	3.67444	-1.52812	2.27918	0.0378599	0.743998	-4.51589
Cttnbp2	-1.11679	-3.912	-2.27904	0.0378701	0.743998	-4.3327
Chchd3	2.65518	2.46458	2.27629	0.038071	0.743998	-4.51611
Rpf2	3.56186	0.324838	2.27297	0.0383142	0.743998	-4.53377
Csf1	4.39852	0.169877	2.27151	0.038422	0.743998	-4.53387
Chst15	-3.83303	2.93844	-2.26927	0.0385881	0.743998	-4.50652
Bcl6	-3.02894	3.68258	-2.26667	0.0387812	0.743998	-4.483
Wdr96	-3.97162	-1.48144	-2.26484	0.0389174	0.743998	-4.51814
Slc35e4	3.32409	-3.01331	2.26165	0.0391564	0.743998	-4.44033
Man2a1	-2.0622	5.14496	-2.26156	0.0391634	0.743998	-4.39251
Anks1b	-3.98764	-2.46547	-2.26098	0.0392071	0.743998	-4.47817
Rpl37a	-0.779266	7.31159	-2.26089	0.0392136	0.743998	-4.08201
Coro7	-1.51026	5.30308	-2.26021	0.0392647	0.743998	-4.37815
Rab39	-1.69606	5.2788	-2.2602	0.0392656	0.743998	-4.38047
I730030J21Rik	-2.83235	-3.33071	-2.25848	0.0393952	0.743998	-4.4114
Zfp36	0.949975	8.0402	2.25743	0.0394751	0.743998	-3.92231
Clcn5	-3.49027	2.4184	-2.25737	0.0394793	0.743998	-4.51821
Aste1	-2.6359	2.24295	-2.25296	0.0398147	0.743998	-4.52134
Ctsd	0.349085	12.6454	2.25189	0.0398964	0.743998	-5.32201
Camta2	-1.13144	7.46177	-2.25165	0.0399145	0.743998	-4.05558
Slc25a32	-4.18838	2.30333	-2.25119	0.0399496	0.743998	-4.52053
Dennd1c	-1.01538	6.80224	-2.25074	0.0399842	0.743998	-4.18251
Gm19395	-3.2293	-2.61419	-2.2468	0.0402874	0.743998	-4.47085
Mrps30	-3.19929	1.58063	-2.24644	0.0403149	0.743998	-4.52954
Lsm5	2.61946	-1.75903	2.24512	0.0404169	0.743998	-4.51132
Duoxa1	3.63665	-2.70183	2.24465	0.0404533	0.743998	-4.4655
Kctd12b	3.87276	2.46216	2.24408	0.0404976	0.743998	-4.51837
Ppm1g	2.33779	5.02447	2.24345	0.0405469	0.743998	-4.40608
Rpl23a	-0.942665	7.29074	-2.24129	0.0407143	0.743998	-4.09589
Glrp1	-3.20546	0.882938	-2.24116	0.0407249	0.743998	-4.53424
Sppl2a	0.87967	8.14837	2.24068	0.0407622	0.743998	-3.90872
Ccndbp1	1.3673	5.66301	2.24021	0.040799	0.743998	-4.34537
Hyal6	1.3238	-3.93712	2.23997	0.0408172	0.743998	-4.33929
5430402O13Rik	3.10518	-2.86331	2.23935	0.0408661	0.743998	-4.45496
Cyth1	-3.50291	2.30894	-2.23913	0.0408829	0.743998	-4.52124
Samhd1	-1.40253	7.29173	-2.2391	0.0408853	0.743998	-4.09677
Ccdc55	3.28085	3.88162	2.23893	0.0408986	0.743998	-4.47751
1700025G04Rik	3.53033	0.156514	2.2384	0.0409407	0.743998	-4.53564
Hexim1	-3.2791	3.9975	-2.2382	0.0409562	0.743998	-4.47232
Efnb3	2.1957	-3.53318	2.23603	0.0411266	0.743998	-4.393
Edf1	-1.99333	5.33653	-2.23458	0.0412408	0.743998	-4.38004
Lrrc40	-3.68756	1.05406	-2.2304	0.0415717	0.743998	-4.53407
Tnfrsf22	3.59857	-2.08756	2.22952	0.0416417	0.743998	-4.49994
Supt6	-1.29532	6.27357	-2.22943	0.0416487	0.743998	-4.27224
9530077C05Rik	-2.55664	-3.44843	-2.22922	0.0416652	0.743998	-4.40387
Kctd15	1.84684	-3.58391	2.22638	0.041892	0.743998	-4.38878
Fut11	3.83779	3.6377	2.22591	0.0419302	0.743998	-4.48874
4931402G19Rik	-4.00686	-1.21588	-2.22472	0.0420253	0.743998	-4.52693
Marveld1	3.43527	-2.05332	2.22389	0.042092	0.743998	-4.50187
Dhx8	3.51297	3.74507	2.22223	0.0422259	0.743998	-4.48497
Adam18	2.53956	-2.90043	2.2207	0.0423491	0.743998	-4.45465
Fryl	0.880278	7.41685	2.21636	0.0427016	0.743998	-4.08332
Zfp236	-1.15011	6.29574	-2.21621	0.0427138	0.743998	-4.27326
Abhd4	-2.69957	4.5262	-2.21511	0.0428029	0.743998	-4.44643
Tcf24	4.40454	-2.01939	2.21351	0.042934	0.743998	-4.50414
Tmem147	4.33328	1.66243	2.21339	0.042944	0.743998	-4.53075
Cyp2d22	-2.79459	-2.69	-2.21338	0.0429448	0.743998	-4.46992
Opn3	3.66727	-1.03299	2.21309	0.0429685	0.743998	-4.53088
Cyb5rl	2.14067	-3.34553	2.21278	0.042994	0.743998	-4.41751
S1pr1	-3.26098	3.22989	-2.20754	0.0434254	0.743998	-4.50377
Atg13	-3.57063	3.31084	-2.20653	0.0435094	0.743998	-4.5015
Man1b1	2.03477	3.70798	2.20539	0.043604	0.743998	-4.48812
Epha4	-3.78865	-3.01939	-2.20467	0.0436634	0.743998	-4.44775
Sobp	3.58551	-2.81903	2.20181	0.0439025	0.743998	-4.46283
Foxo1	-1.70902	5.91731	-2.20082	0.0439847	0.743998	-4.32609
Plekhj1	-3.3355	2.41983	-2.20021	0.0440363	0.743998	-4.52209
Pacs1	-2.53389	5.69352	-2.19994	0.044059	0.743998	-4.35148
Wipf2	-2.51747	5.9772	-2.19762	0.0442541	0.743998	-4.31981
Fastkd1	3.37762	2.91293	2.19713	0.0442949	0.743998	-4.51273
Flt1	-3.13516	-2.92936	-2.19675	0.0443275	0.743998	-4.45567
Sec14l1	-0.919665	7.6855	-2.19592	0.0443977	0.743998	-4.03982
1700030C10Rik	2.29136	-3.28242	2.19583	0.0444046	0.743998	-4.42643
Rab11fip5	2.02521	5.77452	2.19545	0.0444371	0.743998	-4.34373
Catsper2	-3.1207	-2.61158	-2.19458	0.0445109	0.743998	-4.47686
Zfp764	3.76076	2.15963	2.19442	0.0445241	0.743998	-4.52633
Wbp2	-1.63003	5.45003	-2.19275	0.0446659	0.743998	-4.37779
Gm16386	-3.75287	-0.721676	-2.19212	0.0447194	0.743998	-4.53542
Slc5a10	2.7473	-2.40914	2.19212	0.0447195	0.743998	-4.4883
Eif2b1	-3.12018	0.140552	-2.18667	0.0451853	0.743998	-4.5384
Cope	2.65812	4.63817	2.18637	0.0452108	0.743998	-4.44344
Il15	2.56128	2.75454	2.18567	0.0452711	0.743998	-4.51702
E130112N10Rik	3.47951	-2.86106	2.18288	0.0455114	0.743998	-4.46234
Ap1m1	3.45553	3.38381	2.18262	0.0455339	0.743998	-4.5014
2210408I21Rik	4.02533	0.634487	2.18061	0.0457082	0.743998	-4.5383
Ept1	3.6983	4.17223	2.17972	0.0457858	0.743998	-4.47067
Col6a3	3.70031	3.30682	2.17951	0.0458038	0.743998	-4.50398
Ccdc167	-1.69983	5.04352	-2.17932	0.0458203	0.743998	-4.41571
Prrc2a	-1.07069	8.35062	-2.17727	0.0459988	0.743998	-3.91077
Pigyl	-4.79603	0.911275	-2.17715	0.04601	0.743998	-4.53763
Tln2	-1.46605	6.03605	-2.17696	0.0460258	0.743998	-4.31835
Hipk3	2.6279	5.24203	2.17616	0.0460965	0.743998	-4.4
Gm6297	-4.42193	-0.754775	-2.17523	0.0461775	0.743998	-4.53614
Hspa1l	2.2496	-3.24627	2.17244	0.0464222	0.743998	-4.43347
Psmb10	-2.16512	4.31695	-2.17161	0.0464959	0.743998	-4.46427
Gde1	3.18143	3.72001	2.17029	0.0466122	0.743998	-4.49119
Elmo3	3.46035	-0.702386	2.16796	0.0468184	0.743998	-4.5369
Casp3	2.81489	3.664	2.16718	0.0468875	0.743998	-4.49354
Prkrir	-3.42709	3.08023	-2.16606	0.0469874	0.743998	-4.51121
Gm7120	4.35391	-1.26137	2.16564	0.0470248	0.743998	-4.52974
B3galt6	-4.2279	-0.35515	-2.16541	0.0470454	0.743998	-4.53861
Entpd7	3.41702	2.17173	2.16498	0.0470842	0.743998	-4.52807
H13	-1.1073	6.49689	-2.15894	0.0476254	0.743998	-4.26382
Hmha1	0.763857	8.83881	2.15523	0.0479614	0.743998	-3.83174
Cyth2	4.0146	2.1671	2.15069	0.048375	0.743998	-4.52906
Irf5	0.674991	7.09995	2.14973	0.0484624	0.743998	-4.17395
Mrpl2	4.35878	1.2245	2.14632	0.0487766	0.743998	-4.53784
Tmod1	4.27351	2.12801	2.1451	0.0488888	0.743998	-4.52992
5031439G07Rik	-2.17555	5.06293	-2.14331	0.0490547	0.743998	-4.42052
Slc35d2	3.98047	-0.748401	2.14235	0.0491438	0.743998	-4.53803
Psmd3	2.83852	3.44261	2.14221	0.0491563	0.743998	-4.50324
Klhl17	2.63653	4.4507	2.14139	0.0492326	0.743998	-4.46095
Plxna3	-4.35362	-0.475424	-2.14061	0.0493054	0.743998	-4.53953
Mcm5	3.04925	-3.07389	2.13992	0.0493693	0.743998	-4.45266
Mkln1	-0.755977	6.00278	-2.13944	0.0494139	0.743998	-4.3325
Pcdhgb8	3.63065	1.48512	2.13939	0.0494185	0.743998	-4.53655
Tmem19	4.04182	3.1403	2.13919	0.0494376	0.743998	-4.5119
Dbi	-2.49885	4.39431	-2.13821	0.0495293	0.743998	-4.46445
Thoc1	1.85131	4.69838	2.13773	0.0495741	0.743998	-4.44678
Setd8	1.63289	5.14413	2.13767	0.0495795	0.743998	-4.41523
Rims2	3.36539	-2.97873	2.1369	0.0496521	0.743998	-4.46012
Epn1	-1.83286	5.2596	-2.13425	0.0499008	0.743998	-4.40655
Dynll1	-1.89972	5.57692	-2.1337	0.0499527	0.743998	-4.37843
Snrpd3	3.45224	-1.14809	2.13321	0.0499989	0.743998	-4.53381
Dohh	-4.61028	1.26991	-2.13216	0.0500976	0.743998	-4.53837
Fam20b	3.18896	3.54211	2.13076	0.0502304	0.743998	-4.50119
Tcerg1	-1.62159	5.97003	-2.13005	0.050298	0.743998	-4.33872
Fam98c	4.22535	1.27053	2.12943	0.0503567	0.743998	-4.53852
Rab11a	1.36126	5.64527	2.12798	0.0504946	0.743998	-4.37314
Blmh	1.93346	4.26072	2.12505	0.0507737	0.743998	-4.47297
1500011K16Rik	-4.31762	2.30879	-2.1247	0.0508072	0.743998	-4.52886
Nop16	3.32478	2.77866	2.1247	0.0508075	0.743998	-4.52106
Slc6a20b	2.5105	-3.41258	2.12409	0.0508659	0.743998	-4.42603
Ylpm1	-1.00889	7.41712	-2.12356	0.0509164	0.743998	-4.13125
Ift20	-4.69824	1.60363	-2.12291	0.0509785	0.743998	-4.5366
Dnajb5	4.19982	0.774656	2.1211	0.0511534	0.743998	-4.54115
Gtf2ird1	3.89739	2.16804	2.1176	0.0514913	0.743998	-4.53118
Eqtn	1.35858	-4.0728	2.11514	0.0517304	0.743998	-4.35775
Ppfia3	-3.55138	-2.85041	-2.11421	0.0518205	0.743998	-4.47177
Mpnd	-4.04127	1.04761	-2.11357	0.0518836	0.743998	-4.54056
Fbln1	1.13916	-3.87997	2.11186	0.0520502	0.743998	-4.37584
Zbtb34	-1.47789	7.11738	-2.11138	0.0520972	0.743998	-4.18827
Pf4	-2.72414	-3.01963	-2.11027	0.0522066	0.743998	-4.46084
Slc30a6	-4.11144	2.20485	-2.10962	0.0522696	0.743998	-4.53123
Zc3h4	-2.23777	6.5675	-2.10862	0.0523684	0.743998	-4.27145
Espn	-1.79612	-3.78301	-2.10737	0.0524918	0.743998	-4.38869
Psmd14	-1.62277	4.2312	-2.10629	0.0525978	0.743998	-4.4767
Kif15	4.38292	-1.93968	2.10602	0.0526252	0.743998	-4.51601
Ftsj2	1.76749	-3.72537	2.10235	0.0529888	0.743998	-4.39676
Rfc2	3.94612	1.68694	2.10233	0.0529912	0.743998	-4.53712
1110004E09Rik	-4.39214	-1.30394	-2.10048	0.0531751	0.743998	-4.53303
Poli	-2.86133	2.24637	-2.09832	0.0533918	0.743998	-4.53145
Gpr22	-3.9483	0.207659	-2.09807	0.0534164	0.743998	-4.54315
Wdsub1	4.24605	0.681914	2.09728	0.0534959	0.743998	-4.54268
Fam175a	-3.23166	2.94253	-2.09683	0.0535405	0.743998	-4.51986
Dazap1	1.44326	4.33504	2.09609	0.0536156	0.743998	-4.47295
Atp5g1	-2.15624	4.90873	-2.09428	0.0537978	0.743998	-4.43987
Ptprt	3.18694	-3.00535	2.09394	0.0538321	0.743998	-4.4641
Rnf123	-1.57681	5.0314	-2.09029	0.0542019	0.743998	-4.43208
Mustn1	1.30971	-4.08009	2.08984	0.0542469	0.743998	-4.36349
Fut4	3.59094	-1.57472	2.08921	0.0543118	0.743998	-4.5279
Arl5c	-4.25113	-0.542879	-2.08917	0.0543155	0.743998	-4.54206
Bcl7c	3.53946	-1.18209	2.08867	0.0543663	0.743998	-4.53595
Kcnd3	2.70779	-3.52788	2.08677	0.0545604	0.743998	-4.42139
Flnb	1.14136	5.7378	2.08564	0.0546759	0.743998	-4.37408
Mark4	-4.5387	2.29339	-2.08299	0.0549484	0.743998	-4.53183
Prkab2	-3.05873	0.992128	-2.08248	0.0550009	0.743998	-4.54251
Ifitm10	-3.30588	2.57916	-2.08079	0.0551745	0.743998	-4.52778
Myl12a	-1.56846	5.28223	-2.08045	0.0552103	0.743998	-4.41511
Gaa	-1.24491	5.47646	-2.08025	0.055231	0.743998	-4.39914
Mtif2	2.12096	3.89586	2.08024	0.0552319	0.743998	-4.49391
3110082I17Rik	4.40661	1.16982	2.07984	0.0552726	0.743998	-4.54185
Pitpnc1	-1.79482	5.86408	-2.07978	0.0552791	0.743998	-4.36304
Arnt	-1.42637	7.0488	-2.07964	0.0552937	0.743998	-4.21313
Hdgf	2.82799	3.80595	2.07964	0.0552941	0.743998	-4.49728
2310009A05Rik	-4.65401	0.294272	-2.07811	0.0554526	0.743998	-4.5442
Gpr82	-4.33553	-0.0703933	-2.07786	0.0554781	0.743998	-4.544
Tlcd2	-2.28751	-2.99036	-2.07504	0.0557721	0.743998	-4.46772
Ufsp1	3.7584	-0.631445	2.07477	0.0558001	0.743998	-4.54246
Slc8a1	0.65419	8.94828	2.07471	0.0558056	0.743998	-3.89001
Myl2	-3.71556	0.903547	-2.07428	0.0558506	0.743998	-4.54328
Ttyh3	-1.26778	6.26101	-2.07385	0.0558961	0.743998	-4.32148
Plaa	-1.75768	5.62036	-2.072	0.0560894	0.743998	-4.38823
Raph1	-4.26228	3.00788	-2.07117	0.0561763	0.743998	-4.52047
Ppif	-3.89881	-1.3325	-2.07073	0.0562228	0.743998	-4.53437
Dda1	2.79407	3.96078	2.06906	0.0563981	0.743998	-4.49263
Kctd21	3.19258	2.69293	2.06889	0.0564166	0.743998	-4.52674
Nacc2	-2.04916	4.73634	-2.06704	0.0566122	0.743998	-4.45508
Amer2	0.953835	-4.08009	2.06401	0.0569333	0.743998	-4.36994
Mospd2	2.72503	3.8964	2.06391	0.0569436	0.743998	-4.49563
Sdf2l1	2.55383	3.8237	2.06388	0.0569471	0.743998	-4.49827
H1f0	-1.56089	4.87359	-2.06215	0.0571314	0.743998	-4.44738
Dym	2.89247	4.24376	2.0608	0.0572748	0.743998	-4.48169
Trmt61b	4.16282	-0.523966	2.06019	0.0573407	0.743998	-4.54373
Ndst2	1.85333	5.40865	2.05968	0.0573947	0.743998	-4.40909
Hnrnpd	0.918651	7.35707	2.05945	0.0574199	0.743998	-4.17395
Ints3	1.34491	5.47809	2.05682	0.057702	0.743998	-4.40396
Prdm15	3.77545	0.988725	2.05566	0.0578273	0.743998	-4.54399
Idi1	-2.89434	-2.51283	-2.05547	0.0578476	0.743998	-4.49729
Bcan	-2.75793	-2.22382	-2.05508	0.0578891	0.743998	-4.50993
Ap1g2	-2.88707	2.96522	-2.05319	0.0580935	0.743998	-4.52279
Wdr59	-3.90183	1.35905	-2.05312	0.0581014	0.743998	-4.54231
B230217C12Rik	-2.80744	-3.51885	-2.0531	0.0581039	0.743998	-4.4285
Rit1	3.85977	1.30078	2.05188	0.0582362	0.743998	-4.54272
Gsg2	-3.50326	1.50657	-2.05156	0.0582702	0.743998	-4.54147
Siglech	0.353322	10.1049	2.05156	0.0582707	0.743998	-3.87246
3830408C21Rik	-3.16501	-1.55966	-2.05105	0.0583259	0.743998	-4.5309
Cux2	-3.47611	-1.26584	-2.05014	0.0584253	0.743998	-4.53693
Themis2	-2.01431	6.05191	-2.04963	0.05848	0.743998	-4.35165
Rhog	-1.17449	7.23187	-2.04877	0.0585743	0.743998	-4.19891
Rgag4	-4.14634	-1.71763	-2.04869	0.0585826	0.743998	-4.52723
Fgr	-2.61635	-3.19048	-2.04731	0.0587337	0.743998	-4.45744
Hspa2	-1.85199	-3.68693	-2.04633	0.0588413	0.743998	-4.41267
Arntl	3.81145	-1.24594	2.04481	0.0590075	0.743998	-4.5376
Lrrc20	4.17004	-1.8461	2.04459	0.0590316	0.743998	-4.52388
Uevld	4.00882	2.01419	2.04455	0.0590361	0.743998	-4.53758
Cox7a2	2.55223	3.29412	2.04352	0.0591493	0.743998	-4.51611
Hcst	3.95045	0.0174632	2.04328	0.0591766	0.743998	-4.54596
Tmem186	-3.1208	2.41232	-2.04323	0.0591812	0.743998	-4.53288
Mrps12	-3.82883	-0.847993	-2.04202	0.0593146	0.743998	-4.54292
Agfg2	4.07336	-0.793969	2.04123	0.0594019	0.743998	-4.54342
Pde4dip	-0.85202	6.97267	-2.04061	0.0594709	0.743998	-4.24103
9330133O14Rik	-3.94851	1.42072	-2.04022	0.0595143	0.743998	-4.54268
Palld	2.00378	-3.86004	2.04019	0.0595173	0.743998	-4.39455
Zfp677	-3.7666	2.38893	-2.04014	0.0595234	0.743998	-4.53341
Gan	-4.44735	0.272069	-2.03991	0.0595482	0.743998	-4.54624
Fh1	-2.93894	3.22427	-2.03973	0.0595683	0.743998	-4.51814
Tmem39a	2.8379	3.92025	2.03968	0.0595737	0.743998	-4.49735
Sall3	-1.02549	7.09593	-2.03917	0.0596299	0.743998	-4.22381
1500004A13Rik	-3.34953	1.17435	-2.03699	0.059872	0.743998	-4.54421
Rundc3a	3.21292	-1.88442	2.03598	0.0599847	0.743998	-4.5234
Sphk2	-2.19432	5.40554	-2.03555	0.0600327	0.743998	-4.41428
Tenc1	1.55026	-3.86304	2.03507	0.060087	0.743998	-4.39538
Prdx5	-3.29603	3.06304	-2.03395	0.0602119	0.743998	-4.52226
Ndufa7	2.97977	2.50909	2.03298	0.06032	0.743998	-4.5322
Dnajc9	3.61637	3.59026	2.03213	0.0604158	0.743998	-4.50904
Haao	3.26551	-3.00553	2.03188	0.0604433	0.743998	-4.4726
Tbkbp1	-1.38397	4.93644	-2.0313	0.0605086	0.743998	-4.44841
Adat1	-3.61542	-0.370716	-2.02993	0.0606633	0.743998	-4.54591
Uap1	4.32918	3.42012	2.02914	0.0607519	0.743998	-4.51411
Cxx1b	-3.29447	-1.12838	-2.02825	0.0608531	0.743998	-4.54049
Sertad2	-2.34909	4.99667	-2.02794	0.0608882	0.743998	-4.44511
E130311K13Rik	4.12103	0.439948	2.02784	0.0608988	0.743998	-4.54679
Agk	3.57585	2.21814	2.02729	0.0609608	0.743998	-4.53642
Tug1	0.624435	8.16253	2.02706	0.0609871	0.743998	-4.05732
Nr4a2	2.61608	-3.73811	2.02694	0.061001	0.743998	-4.41111
Vcam1	-4.96478	-0.429647	-2.02666	0.0610322	0.743998	-4.54591
Capn7	1.18791	6.21225	2.0264	0.0610622	0.743998	-4.34119
Bnip3l	-1.13478	6.85126	-2.02629	0.0610742	0.743998	-4.26366
Fry	-1.2321	6.78074	-2.02548	0.0611666	0.743998	-4.27337
Polg	2.35376	4.1144	2.02541	0.0611744	0.743998	-4.49146
Carm1	2.82316	3.89331	2.02512	0.0612074	0.743998	-4.49988
Psmb4	-1.33385	5.11538	-2.02511	0.0612086	0.743998	-4.43768
AI414108	1.35811	-3.90657	2.02494	0.0612282	0.743998	-4.39284
Cks2	-2.47709	-3.36661	-2.02439	0.0612899	0.743998	-4.44716
Csf2ra	1.83532	6.32717	2.02245	0.0615106	0.743998	-4.32971
Slc35e3	-2.99375	3.78521	-2.02128	0.0616449	0.743998	-4.50399
Ankzf1	3.51635	2.94526	2.0212	0.0616544	0.743998	-4.52567
Slamf9	-3.25225	4.31117	-2.01854	0.0619584	0.743998	-4.4839
Pclo	-3.92306	0.592099	-2.01806	0.0620143	0.743998	-4.54712
Strap	1.91304	4.5176	2.01752	0.0620757	0.743998	-4.47421
Cep120	-2.74932	4.33539	-2.01668	0.0621727	0.743998	-4.48304
Med12l	-1.1341	6.54989	-2.01516	0.0623477	0.743998	-4.30619
Top1	0.737342	6.42613	2.01315	0.0625809	0.743998	-4.32142
Fam174a	-4.52539	1.52539	-2.01311	0.0625847	0.743998	-4.54356
Hira	4.22446	1.75468	2.01294	0.0626048	0.743998	-4.54188
Sarm1	3.7441	-1.35491	2.01223	0.0626869	0.743998	-4.5377
Ednra	-2.28074	-3.71019	-2.01161	0.0627592	0.743998	-4.4173
Clasrp	2.33466	2.87431	2.01148	0.0627746	0.743998	-4.52776
Mrpl49	4.73516	0.405978	2.01132	0.0627924	0.743998	-4.5477
Setd5	1.46179	7.64412	2.01111	0.0628174	0.743998	-4.15327
Zfp607	3.3132	2.31379	2.0091	0.0630512	0.743998	-4.53646
Gm10052	4.34541	-2.30596	2.00743	0.0632466	0.743998	-4.51114
Fancc	-4.68935	0.799885	-2.00538	0.0634868	0.743998	-4.54733
Matr3	1.29454	6.51951	2.00534	0.0634912	0.743998	-4.31316
Ndrg2	-4.35818	0.540083	-2.00519	0.0635097	0.743998	-4.54788
3110045C21Rik	1.1025	-3.8429	2.00451	0.0635891	0.743998	-4.40444
Crip3	2.81386	-3.61153	2.004	0.0636493	0.743998	-4.4288
Gm16897	3.39342	1.01945	2.00397	0.063653	0.743998	-4.5467
Sirt3	2.49791	1.0581	2.00324	0.0637388	0.743998	-4.54659
Ppm1k	-1.6376	4.10056	-2.00069	0.0640394	0.743998	-4.49486
Thop1	-4.09897	-1.32187	-1.99912	0.0642261	0.743998	-4.53915
Uspl1	1.56096	4.85185	1.998	0.0643591	0.743998	-4.45894
Dcun1d5	2.9942	3.90232	1.99712	0.0644635	0.743998	-4.50254
Ddx41	4.58865	1.4745	1.99607	0.0645885	0.743998	-4.54487
Get4	3.63776	2.18024	1.99563	0.0646411	0.743998	-4.53889
Raver2	-4.24865	0.449723	-1.99539	0.0646694	0.743998	-4.54851
Adam3	3.01762	-0.193327	1.99425	0.0648066	0.743998	-4.54826
4930481A15Rik	2.9863	2.26876	1.99256	0.0650086	0.743998	-4.53809
Slc22a13b-ps	-1.58218	-3.78587	-1.99256	0.065009	0.743998	-4.41321
Med6	4.00913	2.05922	1.99225	0.0650464	0.743998	-4.54039
Ccdc162	-3.07065	2.69479	-1.99195	0.065082	0.743998	-4.53227
BC053749	-3.51209	1.66747	-1.99158	0.0651261	0.743998	-4.54382
Sh3bgrl2	2.36143	-2.91062	1.99019	0.0652942	0.743998	-4.48398
Gstt3	-3.64521	-2.64497	-1.9866	0.065728	0.743998	-4.49846
Cdkn3	1.13145	-4.10706	1.98625	0.0657705	0.743998	-4.38737
Skiv2l2	1.62842	4.60738	1.98598	0.065803	0.743998	-4.47408
Gm20300	3.08163	3.85323	1.98588	0.0658147	0.743998	-4.50538
Nup214	-1.45818	6.42785	-1.98437	0.0659984	0.743998	-4.33058
Gm166	3.23965	0.0381355	1.98411	0.0660301	0.743998	-4.54912
Vezf1	1.34227	6.17603	1.98232	0.0662478	0.743998	-4.35787
Zpr1	-3.71548	1.72804	-1.98231	0.0662491	0.743998	-4.54391
Slc27a1	-4.35848	0.521563	-1.9803	0.0664946	0.743998	-4.54922
Kat2a	-1.67073	5.33566	-1.97929	0.0666189	0.743998	-4.43082
Tmem161a	-3.72902	2.51451	-1.97899	0.0666553	0.743998	-4.53585
Ighmbp2	-2.98407	-0.45495	-1.97735	0.0668572	0.743998	-4.5485
Aplp2	2.10091	4.82052	1.97671	0.0669356	0.743998	-4.46408
Zfp953	2.72803	3.74059	1.97604	0.0670188	0.743998	-4.50998
Ecsit	-2.97493	1.66042	-1.97601	0.0670229	0.743998	-4.54478
Tcaim	-3.60471	1.18355	-1.97584	0.0670432	0.743998	-4.54756
Dnah2	-2.47631	-3.60414	-1.97567	0.0670648	0.743998	-4.43497
Gins1	2.92207	-2.86613	1.97514	0.0671301	0.743998	-4.48842
B230118H07Rik	3.19477	2.24483	1.97427	0.0672368	0.743998	-4.53956
9430091E24Rik	3.6111	-0.185256	1.97314	0.0673776	0.743998	-4.5494
Raly	3.48566	2.40031	1.97297	0.0673977	0.743998	-4.53777
Tarbp2	3.67806	0.762083	1.97265	0.0674374	0.743998	-4.54919
Ttll9	1.46464	-3.68307	1.97192	0.0675285	0.743998	-4.42815
Ero1lb	2.6376	4.33824	1.97161	0.067567	0.743998	-4.48862
Rasa1	-0.784598	6.79168	-1.971	0.0676435	0.743998	-4.29283
Socs7	-3.76307	2.85189	-1.97095	0.0676493	0.743998	-4.53122
0610009L18Rik	2.20167	-2.43329	1.96835	0.0679738	0.743998	-4.50984
Npat	1.89825	5.21842	1.96826	0.067985	0.743998	-4.44106
Nenf	3.83836	0.551975	1.9681	0.0680049	0.743998	-4.54984
Nfe2l1	-1.42555	5.75776	-1.96791	0.0680284	0.743998	-4.40037
Adam8	-3.42015	-2.39199	-1.96722	0.0681151	0.743998	-4.51163
Hist1h4j	1.12921	-3.66034	1.96681	0.0681656	0.743998	-4.43138
Ubr3	-0.811901	7.25065	-1.96651	0.0682037	0.743998	-4.23483
Adck5	-3.456	2.0261	-1.9663	0.0682299	0.743998	-4.54234
Nme1	4.55024	1.04544	1.96604	0.0682621	0.743998	-4.54867
Prr11	2.87125	-2.06041	1.96599	0.0682682	0.743998	-4.5236
Mfng	-1.63034	6.34423	-1.96569	0.0683059	0.743998	-4.34555
Pced1a	3.05745	3.28907	1.96479	0.0684198	0.743998	-4.523
Gpr146	-1.44396	6.17393	-1.96385	0.0685377	0.743998	-4.36341
Ptplad2	-3.47099	1.23807	-1.9619	0.0687833	0.743998	-4.54808
Xlr4a	3.10741	-2.38459	1.96178	0.0687991	0.743998	-4.51246
Cd46	-2.50678	-2.97861	-1.96155	0.0688273	0.743998	-4.48378
Ggnbp1	-3.28982	3.79675	-1.96075	0.0689286	0.743998	-4.50979
Rnf139	-1.41832	6.1353	-1.96064	0.0689426	0.743998	-4.3681
Irs3	3.3265	-2.75533	1.96061	0.0689468	0.743998	-4.49603
Uqcr11	3.39543	2.24813	1.96056	0.0689524	0.743998	-4.54041
Dzank1	-3.52086	-2.81152	-1.96044	0.0689682	0.743998	-4.49317
Zfp862-ps	-2.29171	5.0681	-1.96031	0.0689852	0.743998	-4.45218
Ctdspl2	-1.61908	6.39557	-1.95961	0.0690738	0.743998	-4.34205
Gad1	-2.61581	-3.2672	-1.95943	0.0690963	0.743998	-4.46538
Atf6b	-2.33626	4.03891	-1.95845	0.06922	0.743998	-4.50195
AI593442	1.93304	-3.29777	1.95677	0.0694346	0.743998	-4.4636
Stat5a	-3.51699	1.99452	-1.95606	0.0695243	0.743998	-4.54326
Ube2r2	1.83777	5.50667	1.95572	0.0695687	0.743998	-4.4231
Yif1a	-3.23066	2.51688	-1.95549	0.069598	0.743998	-4.53744
Banp	-3.04212	3.66734	-1.95542	0.0696064	0.743998	-4.51417
Tcp1	-1.31392	5.76746	-1.95493	0.0696689	0.743998	-4.40265
Dph2	2.96792	-1.96151	1.9545	0.0697238	0.743998	-4.52759
Pcna	1.38127	5.67048	1.95394	0.0697955	0.743998	-4.41081
Gcc2	1.13543	5.89698	1.95348	0.0698543	0.743998	-4.39195
6030458C11Rik	-2.24524	3.74303	-1.95316	0.0698955	0.743998	-4.5122
Prdx3	3.48874	2.59259	1.95242	0.0699904	0.743998	-4.53661
Eftud1	3.22272	2.52668	1.95212	0.0700285	0.743998	-4.53754
Ddx3y	-1.11997	6.01446	-1.95101	0.0701714	0.743998	-4.38209
BC037032	3.23024	-2.52959	1.94956	0.0703581	0.743998	-4.50775
Fance	-2.78816	3.27645	-1.94711	0.0706745	0.743998	-4.52479
Cfh	0.42897	9.51234	1.94664	0.0707357	0.743998	-3.97682
2610002M06Rik	2.99043	2.854	1.94656	0.0707454	0.743998	-4.53301
Ctdsp1	-1.4046	5.87297	-1.94641	0.0707652	0.743998	-4.39581
Ssr3	1.04511	7.70954	1.94557	0.0708742	0.743998	-4.18045
Plau	-2.69041	3.78893	-1.94555	0.0708762	0.743998	-4.51158
Chn2	-1.05517	6.89197	-1.94528	0.070912	0.743998	-4.29062
Numa1	0.97924	7.45899	1.94504	0.0709432	0.743998	-4.21641
Anxa7	2.07728	2.91957	1.94421	0.0710505	0.743998	-4.53207
Klf12	-1.47522	5.25907	-1.94402	0.0710751	0.743998	-4.4429
Nagpa	2.47462	4.99951	1.94209	0.0713276	0.743998	-4.45942
9130019P16Rik	3.46086	-0.163895	1.94012	0.071584	0.743998	-4.5512
Hist2h3c2	-1.83229	-2.37165	-1.93973	0.0716352	0.743998	-4.51513
Chek2	4.02098	0.52583	1.93973	0.0716362	0.743998	-4.55137
Rab43	1.48797	6.30417	1.9391	0.0717181	0.743998	-4.35785
Zfp667	3.48505	-0.486551	1.9388	0.0717581	0.743998	-4.55048
Cep70	3.87139	1.66448	1.93864	0.0717787	0.743998	-4.54694
Prkd2	3.97764	1.12238	1.93826	0.0718278	0.743998	-4.54989
Mrpl52	-1.03105	5.29972	-1.93786	0.0718805	0.743998	-4.44137
Tceanc	3.30083	1.31772	1.93768	0.0719044	0.743998	-4.54904
C1galt1c1	1.83432	4.19744	1.93706	0.0719857	0.743998	-4.49857
Slc30a5	-3.30457	2.87383	-1.93661	0.0720452	0.743998	-4.53343
Banf1	3.07234	0.650416	1.93639	0.0720742	0.743998	-4.55136
Pcid2	2.84298	0.99581	1.9358	0.0721528	0.743998	-4.5505
Cnksr2	-2.86136	-3.33836	-1.93571	0.0721635	0.743998	-4.46404
Fbxl5	-1.20691	4.32495	-1.93523	0.0722267	0.743998	-4.49376
9430041J12Rik	1.43585	-3.86304	1.9344	0.0723372	0.743998	-4.41808
Gsap	-1.12794	5.85251	-1.93341	0.0724681	0.743998	-4.40079
Mmp15	1.70672	-3.57525	1.93336	0.0724743	0.743998	-4.44561
Wdr92	3.21998	0.461439	1.93317	0.0724992	0.743998	-4.55179
Macf1	0.210622	12.0074	1.93161	0.0727062	0.743998	-5.02358
Srxn1	2.70857	-3.09225	1.92915	0.0730336	0.743998	-4.48147
C030039L03Rik	-3.95314	-2.36577	-1.92884	0.0730754	0.743998	-4.51641
2900097C17Rik	0.838315	6.81645	1.92843	0.0731305	0.743998	-4.30619
Mxra7	-2.90472	-3.3193	-1.92831	0.0731455	0.743998	-4.46662
Dhrs1	1.87777	4.00346	1.92765	0.0732346	0.743998	-4.50661
Rasgef1b	-3.6458	3.2611	-1.92731	0.0732791	0.743998	-4.52679
Rasgrp4	3.4371	1.6558	1.92699	0.0733227	0.743998	-4.54768
Atg7	-2.82669	3.55219	-1.92661	0.0733731	0.743998	-4.52003
Steap3	-3.00532	-2.52594	-1.92633	0.0734112	0.743998	-4.51035
H2-T10	-2.28522	-3.36831	-1.92474	0.0736244	0.743998	-4.46365
Fam43a	3.658	-0.44739	1.92359	0.0737784	0.743998	-4.55143
Arih1	1.09385	6.70603	1.92295	0.073865	0.743998	-4.32081
Rilp	3.15429	-3.37048	1.92287	0.0738752	0.743998	-4.4638
Fbxl21	-2.17576	-3.25427	-1.92254	0.0739203	0.743998	-4.47204
Micu1	3.70649	2.15294	1.92247	0.0739297	0.743998	-4.54385
Iffo1	-1.02905	7.32023	-1.92203	0.0739895	0.743998	-4.2466
Rab2a	1.43806	6.86364	1.92144	0.0740684	0.743998	-4.30342
Zfp652os	-3.23243	-2.72003	-1.92032	0.07422	0.743998	-4.50248
Cep78	3.20378	-2.30122	1.91854	0.0744607	0.743998	-4.51975
Mesdc2	1.36582	6.65786	1.91772	0.0745726	0.743998	-4.328
Ascc2	-3.03855	3.77227	-1.91738	0.074618	0.743998	-4.51492
Hemk1	3.43099	1.68902	1.91691	0.0746822	0.743998	-4.54804
Rpl27	1.0238	6.49015	1.91621	0.0747773	0.743998	-4.34627
Trappc5	4.24271	1.52895	1.91598	0.0748085	0.743998	-4.54912
Gpsm2	2.47778	-2.21047	1.91532	0.0748995	0.743998	-4.52315
4930526I15Rik	-3.29657	-1.67842	-1.91504	0.074937	0.743998	-4.53787
Mef2c	0.468438	9.46538	1.91459	0.0749981	0.743998	-4.01297
Lekr1	-3.33411	-2.19035	-1.91427	0.0750423	0.743998	-4.52391
Irgm1	2.2195	4.16508	1.91413	0.0750617	0.743998	-4.50248
Fam63b	0.633366	7.90821	1.91173	0.07539	0.743998	-4.1724
Trmt6	-2.93133	2.74124	-1.91113	0.0754718	0.743998	-4.5374
C130050O18Rik	3.81686	1.40353	1.91093	0.0755005	0.743998	-4.55011
Pcnxl4	3.50165	1.47816	1.91086	0.0755093	0.743998	-4.54971
Sp3os	-4.00909	-0.320825	-1.91082	0.0755148	0.743998	-4.55244
Enho	3.66985	-2.52444	1.91063	0.0755404	0.743998	-4.51207
Lactb2	-1.46718	5.06804	-1.90923	0.0757341	0.743998	-4.46103
Klhdc9	3.23339	-1.71749	1.90782	0.075928	0.743998	-4.53752
Crk	-1.5013	6.67882	-1.90765	0.0759522	0.743998	-4.32934
Ptpn11	3.28217	3.40417	1.90738	0.0759896	0.743998	-4.52535
B3galt5	3.45566	3.49857	1.90692	0.0760523	0.743998	-4.52318
Dynll2	2.6178	2.85033	1.90598	0.076182	0.743998	-4.5361
Gm6654	4.41502	-1.31955	1.90479	0.0763474	0.743998	-4.54516
Fbxo17	-3.78083	-2.42921	-1.90398	0.0764602	0.743998	-4.51648
Slc35f6	-1.93855	3.60183	-1.90301	0.0765943	0.743998	-4.52097
Nxpe3	3.00697	-2.42649	1.90226	0.0766996	0.743998	-4.51675
Sp4	-1.33577	6.10253	-1.90197	0.0767393	0.743998	-4.38755
Lhfpl4	2.03619	-3.43999	1.90116	0.0768528	0.743998	-4.46231
Senp5	1.96803	5.13276	1.90078	0.0769054	0.743998	-4.45872
Ube2l6	3.21155	-0.748245	1.90069	0.0769189	0.743998	-4.55151
Gm4070	-3.58108	6.78053	-1.9003	0.0769732	0.743998	-4.32096
Rock1	-1.67145	5.95823	-1.89914	0.0771354	0.743998	-4.40065
Zc3h12a	-3.64271	-0.166861	-1.89823	0.0772622	0.743998	-4.55341
Gramd1b	-4.29257	0.0179799	-1.89723	0.0774037	0.743998	-4.5537
Mzt1	2.80564	4.22772	1.89695	0.0774422	0.743998	-4.50222
Mat2b	3.17582	3.74964	1.8967	0.0774773	0.743998	-4.51763
Nr1i2	0.82149	-4.10706	1.89565	0.0776254	0.743998	-4.40988
4930427A07Rik	-2.70057	-3.3627	-1.89449	0.0777883	0.743998	-4.46906
Ets1	1.77005	5.58179	1.89435	0.0778088	0.743998	-4.43079
Appl1	-1.59877	5.73146	-1.89334	0.0779513	0.743998	-4.42006
Gpld1	3.60172	2.93019	1.893	0.078	0.743998	-4.53579
Tspan18	-1.37125	5.99327	-1.89224	0.0781069	0.743998	-4.39953
Tmem66	-1.63455	6.97781	-1.89214	0.0781211	0.743998	-4.30197
Plin3	-3.61614	-1.65691	-1.89198	0.0781435	0.743998	-4.53997
Adam4	-3.65292	0.0245635	-1.8917	0.0781836	0.743998	-4.55399
Mfsd8	-3.21125	1.54572	-1.89163	0.0781931	0.743998	-4.55041
Ache	3.76689	1.36168	1.89015	0.0784042	0.743998	-4.55148
Pdzrn4	2.40787	-3.2943	1.88991	0.0784381	0.743998	-4.47448
A630089N07Rik	3.38833	-0.888905	1.88846	0.0786436	0.743998	-4.55126
Kank2	-2.25215	-3.13462	-1.88846	0.0786445	0.743998	-4.48475
Gpi1	-1.63957	5.49599	-1.88796	0.0787152	0.743998	-4.43814
Eif4e3	-3.66637	2.766	-1.88748	0.0787832	0.743998	-4.53875
Helz	-0.905589	6.59711	-1.88686	0.0788729	0.743998	-4.34525
Pip5k1a	3.85084	0.91775	1.88631	0.0789516	0.743998	-4.5534
Snupn	4.18833	0.343032	1.8831	0.0794111	0.743998	-4.5545
Tal1	1.86944	4.70817	1.88245	0.0795049	0.743998	-4.48409
Prrg4	-3.25475	-2.86821	-1.88236	0.0795182	0.743998	-4.49996
Cep97	-3.36014	2.63267	-1.88107	0.0797032	0.743998	-4.54107
Gpatch3	-3.37327	-0.457063	-1.87987	0.0798761	0.743998	-4.55375
Gm14306	-2.02893	-2.39669	-1.87926	0.0799653	0.743998	-4.52013
Tet3	0.79937	7.48274	1.87889	0.0800186	0.743998	-4.24717
Spats2	2.43754	-2.61395	1.87712	0.0802749	0.743998	-4.512
Map7d1	-1.65531	6.09361	-1.87699	0.0802933	0.743998	-4.3952
Thumpd3	-1.64094	4.57016	-1.87596	0.0804432	0.743998	-4.49123
BC051226	1.87207	-2.85607	1.87562	0.080493	0.743998	-4.50139
Zfp383	3.25405	-2.27433	1.87468	0.0806298	0.743998	-4.52476
Acer2	-2.60683	-3.29317	-1.87419	0.0807017	0.743998	-4.47704
Gins2	3.69735	-0.778563	1.87406	0.0807206	0.743998	-4.55283
Flt3l	-2.3641	-2.75907	-1.87376	0.0807643	0.743998	-4.50614
Azi2	1.25533	6.06846	1.87372	0.0807701	0.743998	-4.39821
Isoc2b	-3.9763	-1.22436	-1.8735	0.0808024	0.743998	-4.5485
Ak3	-1.65684	4.32454	-1.87165	0.0810724	0.743998	-4.50171
Ppp1r12c	1.10087	5.54544	1.87146	0.0811007	0.743998	-4.43826
Coq9	-3.92268	0.101266	-1.87112	0.0811509	0.743998	-4.55512
Itpr1	-2.96724	3.68724	-1.87014	0.0812942	0.743998	-4.52192
Rbm34	-3.38511	3.51695	-1.87007	0.0813048	0.743998	-4.5261
Ankrd10	0.909535	6.3812	1.86986	0.0813345	0.743998	-4.37182
Smarcb1	-2.05043	4.77943	-1.86885	0.0814835	0.743998	-4.48275
Auts2	3.19811	-3.16517	1.86867	0.0815106	0.743998	-4.48582
Gpam	3.19612	1.02392	1.86839	0.0815516	0.743998	-4.55405
Aamp	-2.38789	4.36934	-1.8677	0.0816532	0.743998	-4.5005
Elp4	3.31175	-0.674168	1.86697	0.0817603	0.743998	-4.5537
Wdr61	-2.9283	2.85966	-1.86683	0.0817808	0.743998	-4.53887
Trim72	1.36548	-3.87106	1.86674	0.0817948	0.743998	-4.43247
Vwa8	1.25989	4.6383	1.86662	0.0818124	0.743998	-4.48956
Phf14	-0.546735	7.45632	-1.86606	0.0818941	0.743998	-4.25696
Rps6ka3	-1.07123	7.4478	-1.86574	0.0819427	0.743998	-4.25816
Ssbp3	-2.54868	2.13956	-1.86521	0.082021	0.743998	-4.54759
Ppp2r5e	2.66343	4.14524	1.86507	0.0820409	0.743998	-4.50888
Bend3	4.47199	-0.0177089	1.86492	0.0820629	0.743998	-4.55536
Tmem50a	-1.05068	6.99892	-1.8645	0.0821257	0.743998	-4.31097
Zc3h8	3.78704	1.63815	1.86431	0.0821536	0.743998	-4.55143
Mphosph8	2.34834	3.7785	1.86417	0.0821745	0.743998	-4.52009
Cspp1	-1.99165	4.12392	-1.86413	0.0821812	0.743998	-4.5097
Rfesd	3.65732	1.53747	1.86398	0.0822024	0.743998	-4.55204
Sh3bp2	1.70062	5.53648	1.86395	0.0822066	0.743998	-4.44046
Gm9833	-2.34225	-2.66867	-1.8633	0.0823039	0.743998	-4.51127
Glrx2	2.81594	3.5846	1.86315	0.0823258	0.743998	-4.52514
Ndnl2	3.09887	0.0127666	1.86305	0.0823412	0.743998	-4.55548
Naif1	-3.7161	-2.05893	-1.86271	0.0823909	0.743998	-4.53233
Gnpnat1	2.03155	2.23147	1.86263	0.0824037	0.743998	-4.54689
Amz2	-2.9038	3.43809	-1.86148	0.0825737	0.743998	-4.52865
Tmed3	2.74407	3.90613	1.86146	0.0825766	0.743998	-4.51677
Tank	2.10614	4.10351	1.86118	0.0826187	0.743998	-4.5107
Mrpl34	4.54046	1.17159	1.8607	0.08269	0.743998	-4.55394
Crcp	3.65143	-0.0194213	1.86008	0.0827826	0.743998	-4.55561
Rbm25	0.82341	7.70945	1.85986	0.0828151	0.743998	-4.22907
Abl1	-0.628635	7.43682	-1.85965	0.0828468	0.743998	-4.26254
Zbtb21	3.91625	1.80492	1.85952	0.082866	0.743998	-4.55062
Mrps11	-3.8772	0.254059	-1.8562	0.0833638	0.743998	-4.55593
Hnrnpa1	1.01328	6.74303	1.85612	0.083376	0.743998	-4.34136
Akr1b3	-4.08376	0.135968	-1.85475	0.0835812	0.743998	-4.55599
Dcaf7	-1.55178	6.45482	-1.85423	0.0836593	0.743998	-4.36997
Fgf12	-0.742866	-4.148	-1.85365	0.0837476	0.743998	-4.41783
Kmt2e	0.511797	9.17866	1.85356	0.08376	0.743998	-4.08445
Vwa9	-1.99219	5.16577	-1.85306	0.083836	0.743998	-4.46533
Crkl	1.10141	6.37716	1.85233	0.0839469	0.743998	-4.37766
Asah1	0.440028	8.75249	1.85136	0.084093	0.743998	-4.11516
Hook3	-0.514347	9.08648	-1.85129	0.0841039	0.743998	-4.09099
Fgfrl1	-2.85716	-2.87097	-1.85128	0.084105	0.743998	-4.50371
Exoc6b	-1.11239	5.77738	-1.85119	0.084118	0.743998	-4.42655
Ago1	-1.0267	7.02368	-1.85025	0.0842611	0.743998	-4.31416
Gmfb	1.02679	6.30243	1.85017	0.0842731	0.743998	-4.38495
Tcf25	-0.615561	7.23732	-1.8497	0.0843438	0.743998	-4.29064
Stradb	-3.29837	3.36233	-1.8472	0.084725	0.743998	-4.53151
Eri2	2.66878	2.27756	1.84695	0.0847622	0.743998	-4.54744
Tmem120b	2.52772	-1.81899	1.84672	0.0847972	0.743998	-4.5397
Mbd3	-1.71471	4.38714	-1.84602	0.0849051	0.743998	-4.50258
Tnfrsf11a	-1.11672	7.27855	-1.84594	0.0849167	0.743998	-4.28769
Jak2	1.55877	5.89567	1.84492	0.0850723	0.743998	-4.41938
Myl6	1.05797	5.53898	1.84446	0.0851428	0.743998	-4.44443
Sdccag8	-0.936089	5.48209	-1.84417	0.0851876	0.743998	-4.44815
Amer1	3.50667	2.89572	1.84408	0.0852006	0.743998	-4.54002
Adam10	-0.614295	7.78129	-1.84379	0.085245	0.743998	-4.22945
Copa	0.654077	7.21788	1.84326	0.0853266	0.743998	-4.29577
4930503L19Rik	3.10763	1.7002	1.84283	0.0853919	0.743998	-4.55229
Tnk2	-4.07116	-2.23807	-1.84252	0.0854398	0.743998	-4.52885
Igfbp4	3.08071	1.29323	1.84222	0.0854868	0.743998	-4.55445
Sub1	2.19388	5.64076	1.84103	0.0856683	0.743998	-4.43843
Tpgs2	-3.84917	1.71417	-1.84066	0.0857263	0.743998	-4.55232
Slc1a5	3.2447	-2.29087	1.84054	0.0857445	0.743998	-4.52739
Mmadhc	-3.05112	3.72396	-1.84028	0.0857848	0.743998	-4.52388
Nmnat3	3.75155	-0.72658	1.83994	0.0858374	0.743998	-4.55495
Rsph3b	3.79383	-0.165504	1.83968	0.0858762	0.743998	-4.5565
0610037L13Rik	-1.54474	5.60155	-1.83946	0.0859108	0.743998	-4.44139
Smad1	1.2834	6.17389	1.83927	0.0859399	0.743998	-4.39902
Sco1	-4.31224	0.266206	-1.83897	0.0859864	0.743998	-4.55683
Pqlc3	-2.89192	1.2217	-1.83859	0.0860447	0.743998	-4.55495
Cubn	2.14523	-2.69925	1.83834	0.0860843	0.743998	-4.51282
Eif4g2	0.465115	9.25113	1.83667	0.0863415	0.743998	-4.09896
4930506C21Rik	-3.40934	-0.984073	-1.83635	0.0863913	0.743998	-4.55341
Aif1	0.624105	7.86949	1.83635	0.0863923	0.743998	-4.22327
Glipr1	-3.13468	-1.51263	-1.83598	0.0864495	0.743998	-4.54646
Txndc5	-2.4904	4.49623	-1.83557	0.0865123	0.743998	-4.49974
Lyn	0.697977	9.44185	1.83532	0.0865507	0.743998	-4.09887
D230025D16Rik	-2.81652	3.681	-1.83438	0.0866974	0.743998	-4.52552
Wdr19	-2.58561	-2.52952	-1.834	0.0867571	0.743998	-4.51989
Pigh	3.54085	2.80606	1.83382	0.0867838	0.743998	-4.54208
Dnajc7	-0.607776	7.27342	-1.83381	0.0867867	0.743998	-4.2939
Klc4	3.16061	2.18224	1.83339	0.086852	0.743998	-4.5492
Wapal	0.931779	7.29196	1.83317	0.0868855	0.743998	-4.29212
Recql	1.34673	4.36422	1.83302	0.0869098	0.743998	-4.50506
Leprel2	-4.07326	0.250062	-1.83271	0.0869582	0.743998	-4.55716
Slc25a46	2.24081	4.62436	1.83234	0.0870149	0.743998	-4.49499
Chst12	-3.37848	0.365739	-1.8323	0.087022	0.743998	-4.55715
AA465934	-2.1689	-1.18522	-1.83221	0.0870347	0.743998	-4.55149
A930005H10Rik	-4.2908	-0.065816	-1.83211	0.0870514	0.743998	-4.55702
Gm13251	-2.006	3.00156	-1.83189	0.0870846	0.743998	-4.5393
Psmd8	2.06818	4.56402	1.83174	0.0871083	0.743998	-4.49756
Sema4a	-3.65983	-0.98076	-1.83151	0.0871444	0.743998	-4.55372
Zdhhc9	-0.973281	6.98465	-1.83148	0.0871499	0.743998	-4.32604
Tm2d3	2.04957	3.37775	1.83111	0.0872078	0.743998	-4.53259
Tmem229a	-2.73188	-2.78306	-1.83068	0.0872747	0.743998	-4.51017
Atg16l1	2.81131	3.11043	1.83019	0.0873506	0.743998	-4.53764
Map4k5	-1.05934	5.52271	-1.83009	0.0873659	0.743998	-4.4485
Ubxn8	-2.37523	3.05911	-1.83002	0.0873769	0.743998	-4.53852
Pold1	-3.35076	0.140623	-1.82869	0.0875855	0.743998	-4.55735
Cep57l1	3.95015	-0.842653	1.82845	0.0876238	0.743998	-4.55495
Wdr41	-1.78562	5.08421	-1.82843	0.0876275	0.743998	-4.47406
Xlr4b	-3.40668	-0.274008	-1.82643	0.0879417	0.743998	-4.55702
Adra2a	-2.91993	-3.10666	-1.82628	0.0879646	0.743998	-4.4952
Tsen34	-3.5191	2.43646	-1.82624	0.0879711	0.743998	-4.54716
Rnf121	3.28667	-0.7451	1.82592	0.0880211	0.743998	-4.55563
Pcdhga11	4.85041	-0.073505	1.82584	0.0880341	0.743998	-4.55734
Plekhm2	2.38038	3.22128	1.82529	0.0881212	0.743998	-4.53608
Ino80d	-0.741861	8.35446	-1.82347	0.0884086	0.743998	-4.17657
Eid2b	-4.05063	0.504192	-1.82331	0.088433	0.743998	-4.55751
Fam76a	3.18364	2.66388	1.82183	0.0886684	0.743998	-4.54483
Mb21d2	3.13037	-2.408	1.82183	0.0886689	0.743998	-4.52537
Gm4980	-1.44276	5.28567	-1.82174	0.0886821	0.743998	-4.46434
Narfl	2.54271	3.33236	1.82131	0.0887505	0.743998	-4.53433
Cdk14	3.52933	1.94068	1.82121	0.0887674	0.743998	-4.55193
Asnsd1	-2.55256	3.59922	-1.82086	0.0888226	0.743998	-4.52874
Pitpnm1	-2.88866	2.60352	-1.82014	0.0889371	0.743998	-4.54567
Irf2bpl	2.63486	3.85206	1.81974	0.0889996	0.743998	-4.5226
6820408C15Rik	-2.78307	-3.40715	-1.81852	0.089194	0.743998	-4.47865
Spryd4	-4.13613	-0.857229	-1.81788	0.0892965	0.743998	-4.55543
Ppp3r1	-1.09672	5.63013	-1.81785	0.0893009	0.743998	-4.44425
Cltb	3.91246	1.75038	1.8165	0.0895168	0.743998	-4.5535
Micu3	3.35961	-0.308662	1.8159	0.0896138	0.743998	-4.5575
Gnpda1	1.45164	5.24975	1.81367	0.0899717	0.743998	-4.46784
Nrm	2.42833	4.52678	1.81225	0.0902002	0.743998	-4.50167
Proz	1.56434	-3.43083	1.81192	0.0902528	0.743998	-4.47821
2210408F21Rik	2.49292	-3.18193	1.81183	0.0902678	0.743998	-4.4932
Rnf166	1.18667	6.40934	1.81155	0.0903128	0.743998	-4.38758
Gm5141	3.41109	1.45678	1.81137	0.0903404	0.743998	-4.55543
Ctnnbl1	-3.39556	1.79584	-1.81057	0.0904704	0.743998	-4.55356
Ifi203	-1.04033	-3.89592	-1.81041	0.0904958	0.743998	-4.44292
Hgsnat	-1.90762	4.10461	-1.81012	0.0905429	0.743998	-4.51644
1810043H04Rik	3.51162	-0.992934	1.80949	0.090645	0.743998	-4.55487
Hmgn1	2.30477	5.05869	1.80718	0.0910195	0.743998	-4.47898
Sft2d3	-3.3637	1.97709	-1.80644	0.0911398	0.743998	-4.55255
Fam83h	-2.93744	-2.47982	-1.80623	0.0911734	0.743998	-4.5245
Ubtd2	3.71359	-0.49176	1.80495	0.091382	0.743998	-4.55764
Tyw5	2.56202	1.96775	1.80478	0.09141	0.743998	-4.55271
Cisd3	-4.22078	-0.983564	-1.80448	0.0914587	0.743998	-4.55523
Zkscan17	-3.21664	3.03305	-1.80407	0.0915253	0.743998	-4.54095
Ip6k1	1.95383	5.99023	1.80247	0.0917867	0.743998	-4.42317
Arhgef26	2.35192	-1.51284	1.80238	0.0918013	0.743998	-4.54869
Cpox	4.04032	2.39257	1.80194	0.0918729	0.743998	-4.54921
Chsy1	-0.687627	7.00134	-1.80138	0.0919655	0.743998	-4.33661
Pfkfb4	-2.38552	4.37531	-1.80025	0.0921502	0.743998	-4.50878
Zfp449	-3.86371	1.59599	-1.79985	0.0922163	0.743998	-4.55536
5430427O19Rik	2.29984	4.67638	1.79784	0.0925472	0.743998	-4.49772
Sowahc	0.628223	7.5621	1.79782	0.09255	0.743998	-4.27979
Luzp2	-0.773686	-4.03047	-1.7974	0.092619	0.743998	-4.43795
Pepd	-3.19748	3.44833	-1.79699	0.0926876	0.743998	-4.53414
Ccnyl1	2.41398	3.79749	1.79683	0.0927126	0.743998	-4.52632
Bclaf1	1.15781	7.55448	1.79644	0.0927776	0.743998	-4.28133
Psmg1	-3.24466	-0.995819	-1.7964	0.0927841	0.743998	-4.55559
Dhx57	-1.27763	6.08118	-1.79614	0.0928264	0.743998	-4.41817
Tubgcp2	-2.14107	3.69867	-1.79541	0.0929482	0.743998	-4.52885
Sfswap	2.12991	5.22252	1.79537	0.0929543	0.743998	-4.47265
Gm3020	-3.45475	-2.06464	-1.79494	0.0930256	0.743998	-4.53782
Rtcb	-2.11099	4.6285	-1.7944	0.0931146	0.743998	-4.50013
Acat3	3.1546	-2.60488	1.79344	0.0932747	0.743998	-4.52143
Usp35	1.01365	6.37591	1.79313	0.0933253	0.743998	-4.39608
Slc35a4	-1.74455	5.49927	-1.79251	0.093428	0.743998	-4.45775
Eif5a2	3.38646	2.20985	1.79206	0.093504	0.743998	-4.55156
B4galnt1	-2.7176	3.68794	-1.79183	0.0935418	0.743998	-4.52944
Zfp60	2.57991	3.91929	1.79143	0.093608	0.743998	-4.52374
Kif3a	-2.45883	4.48975	-1.79112	0.0936592	0.743998	-4.50586
Gtpbp2	-1.87069	6.25937	-1.79085	0.0937052	0.743998	-4.40608
Hist1h2bj	2.63693	-2.14017	1.78997	0.0938518	0.743998	-4.53629
Atp6v1d	1.79132	4.4648	1.78962	0.0939091	0.743998	-4.50696
Pias4	-3.65028	0.105811	-1.78916	0.0939868	0.743998	-4.55938
Crtc2	-0.855775	5.65419	-1.78869	0.0940657	0.743998	-4.44915
Fam163a	0.868498	-4.148	1.78844	0.0941065	0.743998	-4.43396
Mex3a	3.85654	1.15622	1.78797	0.0941862	0.743998	-4.55794
Mamld1	2.6254	2.02281	1.78645	0.0944406	0.743998	-4.55342
Epn2	-2.42573	3.33276	-1.78474	0.094728	0.743998	-4.53742
Sf3b5	3.2738	2.96051	1.78376	0.0948925	0.743998	-4.5436
Cnp	-2.69338	3.46857	-1.78299	0.0950227	0.743998	-4.53497
Etv5	-0.884934	7.33069	-1.7823	0.0951383	0.743998	-4.31182
Zdhhc13	2.86405	4.0155	1.78215	0.0951634	0.743998	-4.52211
Ube2m	-3.08352	0.73381	-1.78213	0.0951668	0.743998	-4.55934
Slc7a7	-0.985308	6.8862	-1.78196	0.095196	0.743998	-4.35536
Rad17	2.81689	1.54102	1.78182	0.0952198	0.743998	-4.55666
Cdc16	2.35671	3.83241	1.78084	0.0953858	0.743998	-4.52705
Smim19	3.46167	1.3052	1.78011	0.0955091	0.743998	-4.55781
Ptbp2	-1.47796	4.19944	-1.77991	0.0955424	0.743998	-4.517
Prpf4	-2.38958	4.39053	-1.7798	0.0955613	0.743998	-4.51083
Rapgef4	3.62671	-1.86676	1.77953	0.0956077	0.743998	-4.54371
Card11	-2.67931	-1.19072	-1.77712	0.0960172	0.743998	-4.55472
Mrps27	3.18608	-0.287695	1.77703	0.0960322	0.743998	-4.55958
Gm21119	-0.992844	-3.89531	-1.77662	0.096102	0.743998	-4.45052
Gm6525	3.31814	-1.4995	1.77657	0.0961102	0.743998	-4.5506
Pspc1	2.19202	4.45689	1.77381	0.0965821	0.743998	-4.50929
Gpkow	2.5347	4.01528	1.77354	0.0966279	0.743998	-4.52304
Adamtsl4	2.21295	-3.21534	1.77354	0.0966284	0.743998	-4.49705
Mvp	2.57745	4.96228	1.7732	0.0966861	0.743998	-4.48917
G6pc3	1.70973	5.47058	1.77237	0.0968283	0.743998	-4.46352
Hmgn2	-2.38921	3.67955	-1.7722	0.0968565	0.743998	-4.5315
Slc30a1	3.53809	2.07532	1.77183	0.0969203	0.743998	-4.55391
Gm19710	2.77018	-2.77453	1.7706	0.0971319	0.743998	-4.51759
Zbtb40	2.20641	3.19823	1.76966	0.0972946	0.743998	-4.54101
Ubxn6	1.59152	4.49968	1.76927	0.0973613	0.743998	-4.50837
Cyp20a1	-4.53257	-0.318073	-1.76924	0.0973669	0.743998	-4.55993
Irak4	-2.79601	3.51605	-1.76899	0.0974091	0.743998	-4.53527
Actr8	2.09879	2.80394	1.76893	0.0974202	0.743998	-4.54681
Slc25a20	3.36971	-1.38166	1.76831	0.097526	0.743998	-4.55283
Olfr1034	0.651155	-4.08009	1.7681	0.0975635	0.743998	-4.44241
Itgax	-2.79231	-2.34326	-1.76763	0.0976435	0.743998	-4.5326
Cadps	2.18429	-3.23129	1.76757	0.0976548	0.743998	-4.49709
Snrpd2	-3.55751	0.831452	-1.76731	0.0976993	0.743998	-4.55993
Mphosph10	2.6735	2.91509	1.76718	0.097721	0.743998	-4.54548
Prkag3	-1.00396	-3.90398	-1.76694	0.0977636	0.743998	-4.452
Tmem170b	-0.644635	8.54884	-1.76672	0.0978011	0.743998	-4.20115
Slc38a2	1.29552	6.39858	1.76613	0.0979026	0.743998	-4.40259
Slc25a33	2.76126	-2.27391	1.76532	0.0980438	0.743998	-4.5348
Jrk	2.33644	-1.46748	1.76472	0.0981485	0.743998	-4.55185
5031425F14Rik	1.70685	-3.49685	1.76464	0.098162	0.743998	-4.48207
Chchd2	-1.71762	5.61473	-1.76447	0.0981911	0.743998	-4.45684
Cd276	3.99635	2.4368	1.7643	0.0982206	0.743998	-4.55125
Cntf	2.4346	-2.62021	1.76416	0.0982453	0.743998	-4.52403
As3mt	2.79439	2.59921	1.76356	0.0983498	0.743998	-4.54961
Lrrc8b	3.59458	-2.06282	1.76331	0.0983928	0.743998	-4.54048
Birc2	1.82044	4.64064	1.76273	0.0984932	0.743998	-4.50408
Exosc1	3.38685	2.23401	1.76178	0.0986588	0.743998	-4.55326
Extl3	-0.818473	8.56137	-1.76147	0.0987131	0.743998	-4.20425
Armc5	-2.15918	3.85369	-1.76127	0.0987481	0.743998	-4.5285
Hist1h2ag	-1.16715	-3.92521	-1.76126	0.0987498	0.743998	-4.45202
Fam50a	-2.88577	2.85712	-1.76094	0.0988056	0.743998	-4.54671
2900076A07Rik	3.31443	0.00804887	1.76076	0.0988365	0.743998	-4.56079
Hpca	-2.23018	-3.12423	-1.76067	0.0988535	0.743998	-4.50355
Repin1	-2.83952	2.21022	-1.75993	0.098982	0.743998	-4.55357
Naa15	1.63408	5.44491	1.75992	0.0989843	0.743998	-4.46746
1810019D21Rik	2.59321	-3.77347	1.75967	0.0990275	0.743998	-4.46357
Arhgap18	4.47276	0.782012	1.75964	0.0990325	0.743998	-4.56043
Arl4a	3.68219	-1.61506	1.75928	0.0990957	0.743998	-4.54995
Bckdhb	3.13672	2.74417	1.75926	0.0990993	0.743998	-4.54825
Camkk1	3.36865	1.90535	1.7591	0.0991276	0.743998	-4.55588
Ptprc	-0.653753	8.52001	-1.75878	0.0991829	0.743998	-4.20953
Itgav	0.986266	8.10738	1.75859	0.0992158	0.743998	-4.24615
Pkib	-2.25936	5.52341	-1.7584	0.0992502	0.743998	-4.4634
Phf6	-3.05782	1.60327	-1.758	0.0993197	0.743998	-4.55769
Fbxo5	2.79077	-0.618442	1.75762	0.0993873	0.743998	-4.55979
Plxnb2	-0.56621	9.06569	-1.75613	0.0996478	0.743998	-4.18159
Gpr19	-3.80092	-1.97915	-1.75586	0.0996957	0.743998	-4.54305
Cbr4	3.64576	0.675732	1.75528	0.0997977	0.743998	-4.56083
U2af2	1.97129	6.4692	1.75432	0.0999678	0.743998	-4.40076
Galk2	2.01431	3.56107	1.75399	0.100025	0.743998	-4.53572
Asap1	1.14146	6.71944	1.75322	0.100162	0.743998	-4.38077
4930565N06Rik	-3.16685	3.9464	-1.75296	0.100208	0.743998	-4.52705
Ndufa11	3.10188	1.80819	1.75259	0.100273	0.743998	-4.55687
Ms4a4c	2.46693	-3.7987	1.75163	0.100443	0.743998	-4.46329
Gabrg2	-1.19386	-3.88384	-1.75134	0.100495	0.743998	-4.457
Kat6b	2.69655	4.27217	1.74996	0.100739	0.743998	-4.51829
Mknk2	3.09587	3.51908	1.74964	0.100795	0.743998	-4.53695
Bcl2	-2.63502	2.78625	-1.74944	0.100832	0.743998	-4.54843
Cluh	2.98585	4.04606	1.749	0.100909	0.743998	-4.52487
Angptl7	-4.35212	0.678853	-1.74836	0.101023	0.743998	-4.56119
Cdkl5	-2.01888	-3.09969	-1.74833	0.101029	0.743998	-4.50645
Dlg2	-3.59102	-2.33265	-1.74831	0.101032	0.743998	-4.53472
Mafg	1.5064	4.67706	1.74821	0.101049	0.743998	-4.50474
Ankra2	-3.08305	1.8176	-1.74796	0.101094	0.743998	-4.55708
Rnf115	1.936	2.97586	1.74783	0.101117	0.743998	-4.54609
Fbxo48	2.96205	-2.83664	1.74783	0.101118	0.743998	-4.51785
Sgpp1	1.10988	6.08864	1.74737	0.101199	0.743998	-4.43072
Sema7a	-1.20202	-3.87811	-1.74627	0.101396	0.743998	-4.45854
Mrc2	3.69401	2.49861	1.74595	0.101453	0.743998	-4.55185
Trmt10b	3.00798	0.591808	1.74572	0.101494	0.743998	-4.56144
Isy1	-3.11051	2.79312	-1.7455	0.101533	0.743998	-4.54863
Gm14431	1.70686	2.98062	1.74502	0.10162	0.743998	-4.54623
Gm8898	1.70686	2.98062	1.74502	0.10162	0.743998	-4.54623
4930528A17Rik	-1.09093	-3.90398	-1.74468	0.10168	0.743998	-4.45696
Baz1b	1.18319	6.44777	1.74375	0.101846	0.743998	-4.40576
Neurl1b	-2.96532	-2.84532	-1.74321	0.101944	0.743998	-4.51807
Cpped1	-3.54553	3.12296	-1.74279	0.102019	0.743998	-4.54435
Lrig3	3.73912	1.21982	1.74278	0.102021	0.743998	-4.56015
Synj2	-3.61971	0.727116	-1.74265	0.102043	0.743998	-4.5614
Exosc6	3.14431	0.674721	1.74248	0.102075	0.743998	-4.5615
Hypk	3.01065	2.86531	1.74234	0.102099	0.743998	-4.54797
Bola2	-3.17416	1.51538	-1.74224	0.102117	0.743998	-4.559
Lin7c	1.27618	6.65435	1.74187	0.102185	0.743998	-4.39012
Zfp760	-1.27886	3.88234	-1.74179	0.102199	0.743998	-4.52979
Gnao1	-3.48287	1.15045	-1.74163	0.102228	0.743998	-4.56044
Rabep2	-2.33643	1.99324	-1.74159	0.102234	0.743998	-4.55633
Slc37a2	1.28324	5.62119	1.74152	0.102246	0.743998	-4.46142
Cacna1s	-1.18633	-3.8051	-1.74134	0.102279	0.743998	-4.46495
Bmyc	-1.6566	7.08758	-1.7411	0.102322	0.743998	-4.35338
Zfp704	-2.09735	4.98264	-1.74075	0.102385	0.743998	-4.4935
Rhot2	3.27548	2.29447	1.74022	0.102482	0.743998	-4.55411
Npepps	1.39333	4.98763	1.73983	0.102551	0.743998	-4.49343
4930563E18Rik	2.84603	-3.63366	1.73944	0.102622	0.743998	-4.47765
A330023F24Rik	-3.25309	1.64041	-1.73937	0.102634	0.743998	-4.55856
Parp11	2.41334	2.05389	1.73934	0.102639	0.743998	-4.55605
Gltscr2	2.39968	4.72211	1.73872	0.102752	0.743998	-4.50439
2310039H08Rik	-4.00327	0.160196	-1.73863	0.102768	0.743998	-4.56201
2810001G20Rik	-3.48294	-0.960488	-1.73761	0.102952	0.743998	-4.55916
Tada2b	-2.3972	3.45803	-1.73745	0.10298	0.743998	-4.53918
Syf2	1.12425	5.16923	1.73652	0.103149	0.743998	-4.48581
Nek8	-3.33587	-2.74937	-1.73636	0.103178	0.743998	-4.52251
Lin52	2.76802	-1.95563	1.73609	0.103228	0.743998	-4.54513
Chd2	0.693482	7.59021	1.73569	0.103301	0.743998	-4.30928
Tmf1	1.30158	5.97051	1.73568	0.103301	0.743998	-4.4416
Eml2	-3.59418	-2.72577	-1.73525	0.10338	0.743998	-4.52349
Maml3	-0.89158	7.40284	-1.73503	0.10342	0.743998	-4.32721
Cryab	2.38918	-3.04875	1.73478	0.103466	0.743998	-4.51063
Iqgap3	3.60236	0.909666	1.73388	0.10363	0.743998	-4.5615
Vstm4	-0.939356	-3.91487	-1.73341	0.103715	0.743998	-4.45883
Pex19	2.98135	3.29668	1.73296	0.103797	0.743998	-4.54239
Vdac1	-1.51645	5.18653	-1.73278	0.10383	0.743998	-4.48566
Erf	2.2636	3.54179	1.73209	0.103955	0.743998	-4.53808
Golga4	0.969643	7.12001	1.73153	0.104057	0.743998	-4.35451
2610207O16Rik	-1.26774	-3.89001	-1.73106	0.104144	0.743998	-4.461
Abhd14a	3.72892	-1.06034	1.73102	0.10415	0.743998	-4.55875
Ndc1	3.18027	-1.89702	1.73029	0.104284	0.743998	-4.54681
B4galnt2	2.73787	-2.3465	1.72999	0.10434	0.743998	-4.53604
Ngdn	3.51916	1.04363	1.72967	0.104398	0.743998	-4.5614
Chl1	-2.9771	-3.42418	-1.72953	0.104424	0.743998	-4.49244
Slit3	2.18885	-3.85437	1.72871	0.104575	0.743998	-4.46408
Shroom1	1.99452	-3.30647	1.72817	0.104673	0.743998	-4.49912
Epg5	-2.38109	3.90922	-1.72814	0.104678	0.743998	-4.53054
Hist1h3c	1.74212	-3.59089	1.72788	0.104726	0.743998	-4.48262
Cd68	-0.50606	9.72311	-1.72781	0.104739	0.743998	-4.23194
Mbtd1	-1.14037	6.18618	-1.72747	0.104801	0.743998	-4.42949
Ppt2	2.58647	2.31991	1.72733	0.104828	0.743998	-4.55471
Cisd1	3.53986	0.392526	1.72645	0.104989	0.743998	-4.56259
Aldh1l2	-3.42877	-1.52886	-1.7264	0.105	0.743998	-4.55346
Lemd3	-1.83946	4.8235	-1.72567	0.105133	0.743998	-4.5024
Prkdc	-1.07677	6.18846	-1.72558	0.105149	0.743998	-4.42986
Zik1	-3.58752	-0.889331	-1.72548	0.105168	0.743998	-4.56032
Olfr101	-1.7012	-3.7424	-1.72525	0.105211	0.743998	-4.47288
Nol3	1.43834	-3.48975	1.72509	0.105241	0.743998	-4.48937
Crtc3	-2.60417	2.97527	-1.72502	0.105253	0.743998	-4.54781
Bcat1	3.03152	-2.45053	1.7243	0.105387	0.743998	-4.5336
Fyttd1	-1.44736	5.64795	-1.72394	0.105453	0.743998	-4.46372
Psd4	-1.28817	5.57356	-1.72383	0.105472	0.743998	-4.46784
Apba2	2.13777	-3.86458	1.72372	0.105494	0.743998	-4.46443
4933433G15Rik	-1.61436	-3.79088	-1.72312	0.105604	0.743998	-4.46981
Gm6568	-0.727391	-3.94242	-1.72255	0.10571	0.743998	-4.45978
Gm15319	-0.831672	-3.96377	-1.72206	0.1058	0.743998	-4.45885
Ehbp1l1	1.93267	5.59053	1.72165	0.105876	0.743998	-4.46737
Ptgfrn	-2.20072	3.18767	-1.72149	0.105906	0.743998	-4.54505
Mrpl55	3.91816	-0.377235	1.72132	0.105938	0.743998	-4.56231
Klra2	1.78233	-3.60597	1.72085	0.106025	0.743998	-4.48295
Rangrf	-1.70252	-3.43905	-1.72083	0.106028	0.743998	-4.49304
Gbp4	2.30171	-3.70248	1.72068	0.106056	0.743998	-4.47658
E230029C05Rik	-0.897926	6.62575	-1.71993	0.106195	0.743998	-4.39988
Gys1	1.7433	-3.12579	1.71938	0.106298	0.743998	-4.50927
Nefl	2.35937	-3.2835	1.71902	0.106366	0.743998	-4.50171
Kdm7a	0.794584	7.24579	1.71871	0.106423	0.743998	-4.34898
Reps1	2.09657	4.14354	1.71866	0.106432	0.743998	-4.52561
Cdc40	-0.865826	5.6614	-1.7177	0.106611	0.743998	-4.46433
Cep72	3.48619	-0.339831	1.71764	0.106622	0.743998	-4.56257
Csde1	0.986358	7.38786	1.71756	0.106638	0.743998	-4.33691
Prr14	2.12532	5.27704	1.71705	0.106732	0.743998	-4.48424
Arid1b	1.16158	5.70122	1.71644	0.106847	0.743998	-4.46239
Cpne9	-0.594299	-4.148	-1.71639	0.106856	0.743998	-4.45156
Dchs1	3.35965	-2.29887	1.71561	0.107001	0.743998	-4.53865
Fzd7	2.4174	1.13931	1.71465	0.107182	0.743998	-4.56191
Zfp472	-3.6465	0.405392	-1.71416	0.107274	0.743998	-4.56322
Kif5b	1.19448	6.82377	1.71373	0.107355	0.743998	-4.38653
Tmem141	3.01762	1.45005	1.7137	0.10736	0.743998	-4.56087
Pgbd5	2.03817	-3.8845	1.71334	0.107427	0.743998	-4.46528
Tsr3	2.45877	2.48159	1.71313	0.107467	0.743998	-4.55419
Exosc9	3.35612	0.95775	1.71283	0.107523	0.743998	-4.5625
Sumo3	2.83632	3.0384	1.71267	0.107554	0.743998	-4.54789
Synj1	-0.552529	7.4799	-1.7123	0.107622	0.743998	-4.33124
Ptpn21	-3.02179	2.82644	-1.71181	0.107716	0.743998	-4.55065
1700001K23Rik	-0.80432	-4.019	-1.7111	0.107849	0.743998	-4.45868
D630032N06Rik	-0.80432	-4.019	-1.7111	0.107849	0.743998	-4.45868
Arl5a	1.57586	5.6446	1.71016	0.108026	0.743998	-4.4669
Socs3	3.63834	0.794151	1.70959	0.108134	0.743998	-4.563
Acta2	-3.62441	-0.167827	-1.7089	0.108264	0.743998	-4.56328
Adcy2	-1.22252	-3.83427	-1.70875	0.108294	0.743998	-4.46974
B930003M22Rik	-2.16649	3.64236	-1.70832	0.108375	0.743998	-4.53828
2210016L21Rik	3.05991	2.02059	1.7078	0.108473	0.743998	-4.55817
C77080	-1.37848	-3.8368	-1.70774	0.108483	0.743998	-4.46978
Mapkapk2	-1.20679	5.43839	-1.70767	0.108498	0.743998	-4.47817
Tacc1	0.688211	8.57552	1.70739	0.10855	0.743998	-4.24505
Dlg3	-2.98565	2.61745	-1.70712	0.108601	0.743998	-4.55326
Ddx54	-3.81245	1.51907	-1.70701	0.108622	0.743998	-4.56094
Sycp3	1.25308	-3.51271	1.70646	0.108726	0.743998	-4.49124
4930581F22Rik	2.77676	0.99939	1.70582	0.108849	0.743998	-4.56277
Glt8d2	2.14135	-3.15005	1.70465	0.109071	0.743998	-4.51023
Wwox	-3.03489	-0.960076	-1.70405	0.109184	0.743998	-4.56102
Fgf14	1.95329	-3.90148	1.70376	0.109239	0.743998	-4.46619
Dnajc11	3.40368	2.77375	1.70353	0.109285	0.743998	-4.55184
Rtn4rl1	0.496382	8.10513	1.70233	0.109514	0.743998	-4.28257
P2rx3	1.94077	-3.90398	1.70229	0.109521	0.743998	-4.46634
Trhde	-1.77187	-3.74229	-1.70173	0.109628	0.743998	-4.4776
Ifngr1	-0.643154	8.8668	-1.70156	0.109661	0.743998	-4.23604
Nln	3.32298	1.88472	1.70076	0.109813	0.743998	-4.55943
Gng13	1.90852	-3.91107	1.7006	0.109844	0.743998	-4.46632
Fpr2	1.90034	-3.91295	1.70043	0.109877	0.743998	-4.46626
Phyhip	-3.05148	-2.92162	-1.70012	0.109936	0.743998	-4.52038
Mgll	-3.55643	3.3291	-1.69988	0.109981	0.743998	-4.54461
Pld4	-0.57253	8.83736	-1.69963	0.11003	0.743998	-4.23867
Fbxl18	2.31554	-0.761227	1.69958	0.11004	0.743998	-4.56239
Mst1	1.86085	-3.92197	1.69946	0.110063	0.743998	-4.46601
Paip1	-1.59034	3.81166	-1.69933	0.110088	0.743998	-4.53565
Pmaip1	3.34628	-1.5323	1.69914	0.110125	0.743998	-4.5552
Akap13	-0.770036	8.70549	-1.69848	0.11025	0.743998	-4.24507
Cyp2j6	-0.737424	-4.10706	-1.69837	0.110272	0.743998	-4.45775
Slc5a11	-0.737424	-4.10706	-1.69837	0.110272	0.743998	-4.45775
Gm14204	1.81601	-3.93215	1.69803	0.110338	0.743998	-4.46581
Mrps33	2.86468	4.21201	1.69781	0.11038	0.743998	-4.52613
Brinp3	2.30144	-3.74139	1.69682	0.110569	0.743998	-4.47864
Mlycd	-3.31163	-0.19863	-1.69674	0.110586	0.743998	-4.56387
Schip1	1.77645	-3.94106	1.69646	0.110639	0.743998	-4.4657
4933406C10Rik	-2.19982	-3.50149	-1.69642	0.110648	0.743998	-4.49363
Rnf17	2.84139	-2.10622	1.69639	0.110654	0.743998	-4.54501
Efhc1	-3.37969	-1.91442	-1.69599	0.11073	0.743998	-4.54907
Zkscan6	-2.81384	2.07815	-1.69462	0.110995	0.743998	-4.55857
Asb7	-2.12077	3.39207	-1.69436	0.111044	0.743998	-4.54404
Pex26	-3.34247	-0.37029	-1.69434	0.111049	0.743998	-4.56372
Dlgap4	1.34577	6.64338	1.69424	0.111068	0.743998	-4.40726
Kctd13	-2.65189	3.54934	-1.69417	0.111082	0.743998	-4.54134
Aff2	1.73156	-3.95109	1.69392	0.11113	0.743998	-4.4658
Akr1b10	1.12438	5.56793	1.69391	0.111132	0.743998	-4.4744
Naga	-2.61629	5.63813	-1.69383	0.111148	0.743998	-4.47077
Zfp106	-0.410512	7.66458	-1.6938	0.111154	0.743998	-4.32459
Map3k12	-2.81298	2.95209	-1.69348	0.111215	0.743998	-4.55046
Kif27	1.72464	-3.95263	1.69346	0.111218	0.743998	-4.46583
Atp2c1	-0.70304	7.51445	-1.69343	0.111224	0.743998	-4.33758
Tctn2	3.1873	-2.42198	1.69341	0.111229	0.743998	-4.53742
Map1lc3b	-1.63783	5.76598	-1.69281	0.111344	0.743998	-4.4641
Rgl2	-1.31756	6.51139	-1.69201	0.111499	0.743998	-4.41749
Ly6g6d	-3.20649	-2.10025	-1.69187	0.111527	0.743998	-4.54551
Terf2ip	3.25813	3.29615	1.69157	0.111585	0.743998	-4.54581
Dnal1	-3.83826	1.82527	-1.69152	0.111595	0.743998	-4.5603
Oas1b	-4.01356	0.0522353	-1.69059	0.111776	0.743998	-4.56441
Mtmr14	-2.72491	2.75133	-1.69058	0.111777	0.743998	-4.553
Adora2b	2.00891	-3.76101	1.69043	0.111807	0.743998	-4.4786
Tmem41b	-1.95889	4.44287	-1.69018	0.111855	0.743998	-4.52044
Gatm	0.895116	6.14496	1.68992	0.111906	0.743998	-4.44249
Anks1	2.00831	5.08416	1.68961	0.111967	0.743998	-4.4976
Zfp229	3.70656	0.67593	1.68955	0.111978	0.743998	-4.56422
Nfkbil1	-2.94752	-1.55756	-1.68925	0.112037	0.743998	-4.5555
Smg7	-1.71922	6.62603	-1.68924	0.112039	0.743998	-4.41022
Syap1	1.62127	3.44796	1.68922	0.112043	0.743998	-4.54355
Zfp386	2.31375	3.77329	1.68918	0.112051	0.743998	-4.53745
Sugt1	3.16348	2.93328	1.68887	0.11211	0.743998	-4.55103
Ckap5	-1.57464	6.30511	-1.68838	0.112206	0.743998	-4.43264
Riiad1	1.65502	-3.96803	1.68833	0.112216	0.743998	-4.46628
Sh3bgr	1.65502	-3.96803	1.68833	0.112216	0.743998	-4.46628
Cwc22	1.86235	3.80541	1.6883	0.112222	0.743998	-4.53687
Ap3b2	-1.54409	-3.74875	-1.68827	0.112227	0.743998	-4.47986
Ifi35	2.82596	3.45926	1.68821	0.112239	0.743998	-4.54344
Aktip	-2.91261	2.6544	-1.68817	0.112247	0.743998	-4.55418
Stxbp1	3.00746	3.46543	1.68812	0.112256	0.743998	-4.54335
Senp7	1.69296	5.72891	1.6878	0.112319	0.743998	-4.46726
Prr5l	-3.26419	0.456795	-1.68755	0.112367	0.743998	-4.56454
Arhgap29	3.62602	2.64605	1.68748	0.112382	0.743998	-4.55431
Rabac1	-0.860743	5.8464	-1.68747	0.112384	0.743998	-4.46086
Abhd5	-1.90721	3.73145	-1.68725	0.112428	0.743998	-4.53849
Pik3r5	0.600293	8.42755	1.6864	0.112594	0.743998	-4.26984
Cox7c	-0.815864	6.22418	-1.68632	0.112609	0.743998	-4.43847
Ik	0.675571	7.79979	1.68627	0.112618	0.743998	-4.31733
Ddx5	0.394565	10.4749	1.68611	0.112649	0.743998	-4.43695
Sec11c	-0.993682	5.99585	-1.68608	0.112656	0.743998	-4.45257
Klrb1b	1.6283	-3.9739	1.68608	0.112656	0.743998	-4.46652
Tspan3	1.72659	5.41709	1.68594	0.112682	0.743998	-4.48345
Sfxn4	-2.84339	2.83824	-1.68554	0.112761	0.743998	-4.55239
Rfxap	3.82706	0.152018	1.68461	0.112945	0.743998	-4.56475
Sema3a	1.60927	-3.97806	1.68437	0.112991	0.743998	-4.46672
3830403N18Rik	1.60337	-3.22659	1.68434	0.112996	0.743998	-4.50966
Fmn2	2.52222	-3.28102	1.68434	0.112997	0.743998	-4.50711
Gnl3l	-3.3825	2.91742	-1.68399	0.113065	0.743998	-4.55158
Usp49	-3.14793	1.17945	-1.68354	0.113153	0.743998	-4.56344
Tas2r143	1.9629	-3.42503	1.6835	0.113161	0.743998	-4.49999
Tfpi	1.81413	5.60943	1.68328	0.113205	0.743998	-4.47451
Prox1	-3.17352	1.45391	-1.68324	0.113213	0.743998	-4.56251
Tmem198b	3.64665	2.20678	1.68312	0.113236	0.743998	-4.55837
Tia1	-0.930305	6.14008	-1.68205	0.113447	0.743998	-4.44492
Kmt2d	-0.564286	9.4248	-1.68138	0.113578	0.743998	-4.25868
4933406J10Rik	-3.20442	-0.934166	-1.68137	0.113581	0.743998	-4.56244
Yipf2	-4.23879	1.54418	-1.68073	0.113707	0.743998	-4.56228
Chpt1	2.64608	2.59215	1.68001	0.113849	0.743998	-4.55534
Wrnip1	2.77398	2.62704	1.67955	0.113941	0.743998	-4.55504
Abcd4	-3.8129	0.869247	-1.67954	0.113942	0.743998	-4.56441
Usb1	3.85646	0.0621105	1.6794	0.11397	0.743998	-4.56498
Cplx3	1.55657	-3.98953	1.67917	0.114015	0.743998	-4.46737
Scfd1	-2.94368	3.40912	-1.6791	0.114028	0.743998	-4.54506
Ntpcr	0.83802	6.5335	1.67891	0.114067	0.743998	-4.42015
Epm2a	-2.17134	-3.08069	-1.67871	0.114107	0.743998	-4.51682
Frrs1	-1.11501	7.08756	-1.67851	0.114146	0.743998	-4.37935
Ppp2r5c	0.951434	6.74773	1.67838	0.114172	0.743998	-4.40513
Mmp19	3.45764	-1.09998	1.67769	0.114308	0.743998	-4.56144
Tlk1	-0.960377	5.73605	-1.67763	0.114321	0.743998	-4.46915
Tec	-1.82913	5.44159	-1.67757	0.114332	0.743998	-4.48392
Ncor2	-0.906333	7.60817	-1.67735	0.114375	0.743998	-4.3379
Slc45a1	1.53306	-3.99462	1.67662	0.114521	0.743998	-4.46772
Nynrin	-3.60802	-1.29918	-1.67641	0.114563	0.743998	-4.55954
Acox1	1.84584	4.69484	1.67567	0.11471	0.743998	-4.51432
Zfp36l2	0.500117	9.20527	1.67554	0.114736	0.743998	-4.25661
Map4k2	-1.50305	5.43228	-1.67484	0.114876	0.743998	-4.4849
Pdhx	-2.05496	1.98056	-1.67382	0.115079	0.743998	-4.56043
Syndig1l	1.50783	-4.00006	1.67369	0.115104	0.743998	-4.46814
Aifm1	-2.9493	1.4958	-1.67347	0.115147	0.743998	-4.56288
Ppp1r13b	-2.25066	3.86819	-1.67339	0.115164	0.743998	-4.53701
Gm13305	-0.685333	-3.91342	-1.67326	0.11519	0.743998	-4.47222
Ggcx	1.54338	4.00227	1.67314	0.115214	0.743998	-4.53407
Srsf1	-0.843893	7.58645	-1.67296	0.115251	0.743998	-4.34192
Calm2	0.441974	9.41132	1.67278	0.115285	0.743998	-4.26664
Csmd3	-0.66135	8.84305	-1.67251	0.11534	0.743998	-4.26129
Btbd8	-2.36908	-2.60662	-1.67247	0.115348	0.743998	-4.53423
Pde6g	-1.43889	-3.83286	-1.67238	0.115366	0.743998	-4.4775
Prepl	1.47369	4.98752	1.67191	0.115459	0.743998	-4.50435
Wac	0.831727	7.38396	1.67191	0.11546	0.743998	-4.35874
Psmb9	1.67857	4.82917	1.67105	0.115632	0.743998	-4.51034
Thra	-3.38247	-1.35997	-1.67093	0.115656	0.743998	-4.55916
Actr2	0.453488	8.57664	1.6706	0.115722	0.743998	-4.27311
Ms4a6c	-2.83412	-0.131531	-1.67013	0.115816	0.743998	-4.5653
Btg2	-0.699446	6.68763	-1.67009	0.115825	0.743998	-4.41233
Mitf	-1.93035	3.66642	-1.66993	0.115857	0.743998	-4.54138
Tomm6	2.55395	2.29537	1.66984	0.115874	0.743998	-4.55854
Klk8	-2.25083	3.7174	-1.66922	0.115999	0.743998	-4.54048
Mrpl4	-2.37478	3.34696	-1.6692	0.116002	0.743998	-4.54688
Zfp516	2.37475	4.91652	1.66905	0.116034	0.743998	-4.50747
Olfr1329	1.4663	-4.00897	1.66848	0.116147	0.743998	-4.46892
Srp54a	2.50054	4.43788	1.6682	0.116204	0.743998	-4.52335
Gle1	3.55049	1.79917	1.66794	0.116256	0.743998	-4.56179
0610010K14Rik	-1.61638	4.93807	-1.66781	0.116282	0.743998	-4.50687
Rtp4	-2.42688	2.73442	-1.6675	0.116344	0.743998	-4.55479
Rbm28	1.76948	6.0734	1.66725	0.116394	0.743998	-4.45284
Rbpj	1.09793	6.54743	1.66691	0.116463	0.743998	-4.42307
Dcakd	2.73114	4.52136	1.66653	0.116539	0.743998	-4.52109
Perp	-0.848227	-3.99203	-1.66613	0.11662	0.743998	-4.47022
H2afv	3.16504	1.83547	1.66542	0.116764	0.743998	-4.56175
Ncs1	3.41062	-0.512166	1.66539	0.116769	0.743998	-4.56492
Baiap2l1	2.80217	1.08644	1.66532	0.116784	0.743998	-4.56466
Kif24	1.67978	-2.38051	1.66497	0.116855	0.743998	-4.54122
Rnf126	-2.40903	3.3045	-1.6647	0.11691	0.743998	-4.54789
Bag6	1.03726	5.92738	1.66455	0.11694	0.743998	-4.46184
Kdm4d	-0.853724	-3.97189	-1.66415	0.11702	0.743998	-4.47155
Hdac7	-1.44061	-3.7511	-1.66296	0.117263	0.743998	-4.48476
AI462493	3.56831	1.80186	1.6628	0.117294	0.743998	-4.56207
Nutf2-ps1	-2.68957	2.13354	-1.66256	0.117342	0.743998	-4.56013
Hist1h2ab	1.30474	-3.68087	1.66253	0.117348	0.743998	-4.48921
Eml3	-1.82257	4.32736	-1.66228	0.1174	0.743998	-4.52717
Prpf6	-2.12053	4.28285	-1.66153	0.117552	0.743998	-4.52845
Cpsf2	2.5289	5.07203	1.66081	0.117698	0.743998	-4.50288
Jup	-2.76629	3.19953	-1.66072	0.117716	0.743998	-4.54971
Pkn1	-1.46099	5.82297	-1.65979	0.117906	0.743998	-4.46861
Il1a	1.46608	5.82842	1.65976	0.117913	0.743998	-4.46833
Mrps24	3.38199	1.6543	1.65925	0.118016	0.743998	-4.56298
Rps11	-0.446812	6.81158	-1.65915	0.118036	0.743998	-4.40742
Ivns1abp	0.371488	12.4375	1.65892	0.118082	0.743998	-5.97276
Deaf1	3.06676	2.62194	1.65807	0.118256	0.743998	-4.55653
Eef1b2	-1.23878	5.99549	-1.6578	0.118312	0.743998	-4.45971
Serpinb6a	4.04612	0.0576433	1.65742	0.11839	0.743998	-4.56609
2610316D01Rik	1.38447	-4.02646	1.65639	0.118599	0.743998	-4.47095
Jade1	-1.89561	4.95037	-1.65455	0.118978	0.743998	-4.50848
Atmin	-1.47054	6.47016	-1.6542	0.11905	0.743998	-4.43218
Crebrf	0.81774	7.32676	1.6534	0.119213	0.743998	-4.37172
Ccdc6	1.24508	6.10448	1.65295	0.119307	0.743998	-4.45479
Gp5	2.00617	-3.80267	1.65248	0.119403	0.743998	-4.48356
Ctrl	-1.89955	-3.72835	-1.65219	0.119462	0.743998	-4.48831
Metap2	1.82807	6.03497	1.65215	0.119471	0.743998	-4.45894
Mdm2	-1.36334	6.53672	-1.65204	0.119493	0.743998	-4.42856
Ech1	-2.45505	3.83012	-1.65192	0.119517	0.743998	-4.53992
Stim1	3.3493	2.09624	1.65136	0.119634	0.743998	-4.56105
Rab1b	-2.80848	3.16034	-1.65132	0.119642	0.743998	-4.55098
Vipr1	-2.76746	1.4797	-1.65075	0.119759	0.743998	-4.56418
Cep44	-3.00918	-0.620889	-1.65056	0.119798	0.743998	-4.56542
Tmem161b	-2.797	2.14779	-1.64992	0.119932	0.743998	-4.5608
Gdpd5	-1.49522	-3.68248	-1.64965	0.119987	0.743998	-4.49157
Fgl2	-3.22773	2.05168	-1.64946	0.120026	0.743998	-4.56144
Yif1b	2.87043	4.20708	1.64799	0.12033	0.743998	-4.53194
Timm17b	3.83837	0.535114	1.64778	0.120375	0.743998	-4.56649
Mpv17l2	-2.53888	1.08833	-1.64691	0.120555	0.743998	-4.56562
Dtwd1	2.52933	-2.35616	1.64614	0.120715	0.743998	-4.54357
Olfr176	1.32462	-4.03915	1.64589	0.120767	0.743998	-4.47286
Aprt	2.68385	0.718483	1.64568	0.120811	0.743998	-4.56639
Hist1h4h	-2.81448	-2.74341	-1.64552	0.120843	0.743998	-4.533
Map7	2.85392	1.17961	1.64512	0.120926	0.743998	-4.56547
Rpl35	-1.1949	5.28762	-1.64497	0.120958	0.743998	-4.49691
Mrps10	-2.9499	0.883921	-1.64457	0.121041	0.743998	-4.56618
Taf1	2.05595	4.98333	1.644	0.121159	0.743998	-4.50893
Kbtbd3	3.14958	1.18946	1.644	0.12116	0.743998	-4.5655
Akap1	2.45852	-2.86311	1.64395	0.12117	0.743998	-4.52932
Spef1	-1.52359	-3.80761	-1.6436	0.121243	0.743998	-4.48506
Trpv2	1.78821	4.72121	1.64284	0.121402	0.743998	-4.51807
Jtb	1.71266	4.0662	1.64273	0.121424	0.743998	-4.53584
Atp5l	-1.07393	4.95549	-1.64256	0.121461	0.743998	-4.51017
1110001J03Rik	3.52329	-0.143832	1.64248	0.121477	0.743998	-4.56669
Dennd1b	2.22166	4.91039	1.64227	0.121522	0.743998	-4.51181
Pik3c2a	-1.04522	6.4654	-1.64194	0.121589	0.743998	-4.43628
Zbtb10	2.95433	3.16465	1.64189	0.1216	0.743998	-4.55166
Incenp	3.59307	0.579642	1.64166	0.121648	0.743998	-4.56676
Rcn3	3.45071	-1.48518	1.64095	0.121797	0.743998	-4.55956
Pgap2	-1.48623	3.39809	-1.64046	0.1219	0.743998	-4.54849
Sigmar1	-3.98437	0.815327	-1.64046	0.121901	0.743998	-4.56651
Zfp869	1.75647	5.24464	1.63991	0.122016	0.743998	-4.49958
Htra4	2.21889	-3.71922	1.63879	0.122249	0.743998	-4.49147
Ska1	-2.50652	-3.50133	-1.6382	0.122375	0.743998	-4.50361
Fbxo4	-2.9573	0.959395	-1.63788	0.122442	0.743998	-4.56638
Myeov2	2.56205	1.9479	1.63761	0.122499	0.743998	-4.56274
Lipt1	2.39294	-3.37932	1.63751	0.12252	0.743998	-4.5097
Eif4b	-0.753125	6.88555	-1.63696	0.122636	0.743998	-4.41043
Spata13	0.650932	8.15011	1.63644	0.122745	0.743998	-4.32138
2210015D19Rik	-3.85762	0.972854	-1.63599	0.122839	0.743998	-4.56645
Sart1	2.02726	4.38595	1.63439	0.123177	0.743998	-4.52897
Per3	1.54108	4.85648	1.63339	0.12339	0.743998	-4.515
Pilra	1.58016	4.27669	1.63324	0.123421	0.743998	-4.53191
Camkv	-1.33916	-3.65503	-1.633	0.123472	0.743998	-4.49628
Yeats4	1.79619	4.33897	1.63258	0.123561	0.743998	-4.53041
Cct2	-1.02765	6.00541	-1.6318	0.123727	0.743998	-4.46569
Cdh6	1.2528	-4.05422	1.63134	0.123825	0.743998	-4.47561
Tmx2	1.90693	4.01123	1.63111	0.123874	0.743998	-4.53828
Trafd1	1.02508	7.36304	1.63055	0.123994	0.743998	-4.37947
Taldo1	2.56113	4.31702	1.63049	0.124005	0.743998	-4.53122
Prkra	2.3087	2.18981	1.63026	0.124053	0.743998	-4.56171
Serpinc1	3.22881	-2.92835	1.62998	0.124114	0.743998	-4.52881
Fam199x	-2.13169	3.11891	-1.62988	0.124135	0.743998	-4.55317
Sh3bp5l	3.25348	-0.158782	1.62974	0.124164	0.743998	-4.56731
Hist1h2ap	-2.76114	-2.13125	-1.62945	0.124226	0.743998	-4.55001
Phkg1	1.56032	-3.80046	1.62911	0.124299	0.743998	-4.48847
Tnfrsf12a	2.66599	-2.88528	1.629	0.124322	0.743998	-4.53037
Mtx1	-3.40779	1.21411	-1.62809	0.124517	0.743998	-4.56626
Fdx1	2.83225	-0.164205	1.62791	0.124556	0.743998	-4.5674
Copg2	2.0658	4.26009	1.62781	0.124577	0.743998	-4.53295
Cul9	2.66367	3.13279	1.62764	0.124614	0.743998	-4.55317
Spcs1	-1.1374	5.21436	-1.62645	0.124867	0.743998	-4.50315
4930539J05Rik	-1.73939	-3.72537	-1.6263	0.124899	0.743998	-4.49354
Vps45	2.55324	1.54009	1.62613	0.124936	0.743998	-4.56528
Mppe1	2.30311	-1.11812	1.62555	0.125059	0.743998	-4.56423
Irf2	-1.05787	6.32572	-1.62462	0.12526	0.743998	-4.44986
Exosc10	-1.56393	4.83298	-1.62446	0.125293	0.743998	-4.5171
Fam161a	-2.29223	-3.29832	-1.6243	0.125328	0.743998	-4.51538
Thumpd1	3.30019	1.30119	1.62376	0.125445	0.743998	-4.56623
Chid1	2.87698	3.08491	1.62313	0.12558	0.743998	-4.5541
Ccdc126	2.65038	-2.25936	1.62285	0.12564	0.743998	-4.54788
Lrif1	-1.09217	5.27253	-1.62255	0.125704	0.743998	-4.50156
Xlr3a	-1.87757	-3.34162	-1.62157	0.125915	0.743998	-4.5139
Tmem81	3.18271	-1.89073	1.62115	0.126005	0.743998	-4.55512
Pea15a	1.36842	6.28271	1.6209	0.126059	0.743998	-4.45338
Akr1c13	-1.27875	-3.79984	-1.62081	0.126078	0.743998	-4.4902
Kif1b	1.0713	6.84344	1.6208	0.126082	0.743998	-4.41918
Rictor	0.867291	5.64437	1.62032	0.126186	0.743998	-4.48615
Zbtb5	-3.87029	2.20205	-1.62025	0.126199	0.743998	-4.56224
Elk3	-0.518693	8.15975	-1.61961	0.126339	0.743998	-4.33152
Adprm	-3.24634	1.91379	-1.61953	0.126356	0.743998	-4.56397
Stmn1	-3.16296	0.973249	-1.61951	0.12636	0.743998	-4.56729
Morn1	1.07138	-3.8879	1.61942	0.12638	0.743998	-4.48536
Surf4	-1.32333	5.87131	-1.61861	0.126555	0.743998	-4.47576
Rabl6	-1.74987	5.77794	-1.61803	0.126681	0.743998	-4.48042
Shd	2.32156	-2.96954	1.61774	0.126744	0.743998	-4.52893
4632427E13Rik	-2.48014	2.43202	-1.61764	0.126764	0.743998	-4.56079
Skap1	3.35503	-2.70245	1.61691	0.126923	0.743998	-4.53737
Cpeb3	2.83968	-0.500315	1.61655	0.127	0.743998	-4.56746
Bcl2a1b	0.851724	5.62876	1.61646	0.127021	0.743998	-4.48768
Mmp28	2.82498	-1.20291	1.61628	0.12706	0.743998	-4.56402
Ercc1	3.26046	-0.371189	1.61555	0.127218	0.743998	-4.56775
Wasf1	-2.26402	-3.27637	-1.61529	0.127275	0.743998	-4.51766
Zfp941	-1.81849	-3.67085	-1.61499	0.127341	0.743998	-4.49877
Tmem254b	3.02809	-1.30751	1.61484	0.127373	0.743998	-4.56313
Zfp57	3.40445	-1.24438	1.61418	0.127517	0.743998	-4.56377
Gtf2i	1.1251	6.84851	1.61396	0.127564	0.743998	-4.42134
Apba3	3.21862	0.422123	1.61341	0.127685	0.743998	-4.56829
Tbc1d20	-2.35427	3.45171	-1.61311	0.12775	0.743998	-4.55
Mrpl43	2.49159	2.78109	1.61227	0.127935	0.743998	-4.55815
Ruvbl2	-3.11483	3.75365	-1.61207	0.127978	0.743998	-4.5452
Sh3d21	3.12719	-2.0504	1.61205	0.127983	0.743998	-4.55298
Sdhb	2.6951	4.76017	1.61122	0.128164	0.743998	-4.52131
S100a8	2.97901	-2.75922	1.60921	0.128604	0.743998	-4.53658
Mpp5	1.72829	5.3299	1.60914	0.128619	0.743998	-4.50172
Bach1	1.07006	6.15268	1.60837	0.128789	0.743998	-4.46393
Smc3	1.10002	6.05281	1.60794	0.128882	0.743998	-4.46923
Atp8b2	3.58506	1.4782	1.60758	0.128961	0.743998	-4.56652
Mrpl53	3.32051	2.16026	1.60726	0.129032	0.743998	-4.56329
Mrpl17	-2.56124	4.06674	-1.60643	0.129215	0.743998	-4.5397
Tbc1d32	-3.05894	2.7486	-1.60537	0.129448	0.743998	-4.55893
Ccdc28a	-3.46711	-1.29511	-1.6053	0.129465	0.743998	-4.56382
Utp20	3.01028	3.48442	1.60525	0.129476	0.743998	-4.55019
Rbfa	-2.51488	2.33062	-1.60482	0.129571	0.743998	-4.56233
Pgap3	2.45654	-3.06022	1.60458	0.129624	0.743998	-4.52746
Cnga2	-1.05932	-3.97806	-1.60358	0.129844	0.743998	-4.48481
Ndufa4l2	1.37701	-3.81764	1.60355	0.129852	0.743998	-4.49265
Slc14a1	-3.72214	-1.53393	-1.60331	0.129905	0.743998	-4.56138
4931406P16Rik	1.92854	4.5783	1.60317	0.129935	0.743998	-4.5277
Cmtr2	3.20123	-1.32182	1.60284	0.130008	0.743998	-4.5637
Olfr856-ps1	-2.02949	-3.17374	-1.60257	0.130069	0.743998	-4.52358
Unkl	2.10729	4.25123	1.60238	0.13011	0.743998	-4.53608
Gpr124	-2.05611	-3.43927	-1.60225	0.130139	0.743998	-4.51257
Klhl15	-3.24225	-0.393447	-1.60207	0.130179	0.743998	-4.56839
Invs	-1.96004	4.06287	-1.60171	0.130259	0.743998	-4.54028
Fam210b	3.09837	1.88161	1.6015	0.130306	0.743998	-4.56516
Tmem254a	-2.52884	-2.89722	-1.60126	0.130358	0.743998	-4.53332
Tomm6os	-3.16263	-2.12661	-1.60097	0.130423	0.743998	-4.55244
Samsn1	-1.05122	5.68944	-1.60057	0.130511	0.743998	-4.48834
Tapbp	-1.01801	6.96519	-1.60046	0.130537	0.743998	-4.41894
Oscp1	-3.13252	0.41003	-1.60034	0.130563	0.743998	-4.56894
Bloc1s6	-2.43873	2.98743	-1.60011	0.130615	0.743998	-4.55691
Ddx1	1.82526	4.45818	1.60008	0.130622	0.743998	-4.5313
Mirg	1.12783	-4.08009	1.59998	0.130644	0.743998	-4.48185
Zfp850	-3.77941	-0.33062	-1.59969	0.130707	0.743998	-4.56861
Spred2	-3.62529	2.37058	-1.59962	0.130723	0.743998	-4.56237
Ppp2r2d	-2.21189	3.32425	-1.59943	0.130767	0.743998	-4.55293
Mknk1	-0.652838	7.30673	-1.59898	0.130867	0.743998	-4.39753
Gm5420	-1.35467	-3.73876	-1.59885	0.130896	0.743998	-4.49811
Mrpl30	3.16277	2.33641	1.59808	0.131067	0.743998	-4.56271
C1ra	-1.96845	-2.92398	-1.59799	0.131087	0.743998	-4.53286
Nedd4	-1.47038	-3.70817	-1.59794	0.131098	0.743998	-4.49996
Nrd1	-0.889493	7.0661	-1.59785	0.131118	0.743998	-4.41355
Chfr	-1.6965	4.33132	-1.59768	0.131155	0.743998	-4.53474
2810454H06Rik	2.58915	-2.72657	1.59754	0.131188	0.743998	-4.53881
Clvs1	-3.55842	-2.91918	-1.59724	0.131253	0.743998	-4.53311
Nacc1	2.02565	5.40625	1.5964	0.131441	0.743998	-4.50107
Jmjd7-pla2g4b	2.0528	-3.22556	1.59525	0.1317	0.743998	-4.52262
Lztfl1	-2.00457	4.25793	-1.59437	0.131897	0.743998	-4.53684
Gm14440	-1.42367	3.88909	-1.59433	0.131906	0.743998	-4.54445
Ndufa6	2.3371	1.61079	1.59375	0.132035	0.743998	-4.56678
Rcl1	3.10931	-0.313104	1.59353	0.132084	0.743998	-4.56894
Aurkaip1	-2.30669	3.36232	-1.59349	0.132095	0.743998	-4.5529
Sin3a	-1.33611	6.32124	-1.59321	0.132156	0.743998	-4.45913
Arap3	0.978834	7.65364	1.59248	0.132321	0.743998	-4.37825
Lmbr1	3.34915	0.523977	1.59233	0.132355	0.743998	-4.56927
Parp3	-2.47359	2.13324	-1.59202	0.132423	0.743998	-4.56436
Ccdc51	2.98459	-1.73969	1.59171	0.132494	0.743998	-4.55955
2023-09-03	-0.961682	-4.04386	-1.59158	0.132524	0.743998	-4.48505
Pcbp3	-2.02217	-3.63046	-1.59138	0.132567	0.743998	-4.50525
Zfp712	-3.51633	0.416139	-1.59122	0.132604	0.743998	-4.56939
Cnksr3	3.62446	-1.37617	1.59046	0.132776	0.743998	-4.56389
Rell1	-2.95413	-1.55099	-1.59033	0.132804	0.743998	-4.56201
Usp31	-2.30382	4.77771	-1.59006	0.132866	0.743998	-4.52379
4931423N10Rik	1.84369	-3.80787	1.58967	0.132953	0.743998	-4.49603
Sap30bp	3.55988	1.89582	1.58924	0.133052	0.743998	-4.56579
Ccdc58	2.69005	0.446148	1.58913	0.133075	0.743998	-4.56948
Eya4	0.983904	5.14762	1.58891	0.133125	0.743998	-4.51203
Ppp1r21	1.10966	7.34911	1.5889	0.133127	0.743998	-4.3993
5330417C22Rik	1.08863	-4.08811	1.58827	0.133269	0.743998	-4.48425
D030047H15Rik	1.08863	-4.08811	1.58827	0.133269	0.743998	-4.48425
Ranbp6	-2.22711	4.38988	-1.58785	0.133366	0.743998	-4.5345
Psd3	3.44988	0.516632	1.58717	0.13352	0.743998	-4.56953
Crebbp	-0.517929	8.55044	-1.58691	0.13358	0.743998	-4.33656
Cd34	0.806614	6.95538	1.58685	0.133591	0.743998	-4.42472
A230056P14Rik	1.71329	-2.91679	1.58496	0.13402	0.743998	-4.53467
Mthfd2l	-2.86769	-2.50649	-1.58427	0.134178	0.743998	-4.54584
Alg3	2.16526	3.04301	1.58396	0.134249	0.743998	-4.5575
Mb21d1	-1.5589	5.786	-1.58381	0.134282	0.743998	-4.48772
Med30	3.13907	1.76547	1.58304	0.134459	0.743998	-4.56673
Atp7a	-0.84953	7.26292	-1.58282	0.134508	0.743998	-4.40739
Ids	0.740844	7.97819	1.5828	0.134513	0.743998	-4.36425
Plp1	2.65904	-1.0611	1.58255	0.134571	0.743998	-4.56705
Rbm41	1.40256	4.21719	1.58217	0.134656	0.743998	-4.53912
Edem1	-0.739567	7.98717	-1.58169	0.134767	0.743998	-4.36441
Rnf24	-2.57623	4.1397	-1.58157	0.134794	0.743998	-4.54084
A530072M11Rik	-1.57429	-3.56914	-1.58103	0.134918	0.743998	-4.51011
Zfp523	-3.3166	0.717161	-1.58087	0.134953	0.743998	-4.56965
Phldb3	-2.55819	-2.92017	-1.58073	0.134985	0.743998	-4.53507
Med17	-2.35823	3.22414	-1.58036	0.135071	0.743998	-4.55571
Prrc2b	0.859986	7.13378	1.58012	0.135126	0.743998	-4.41648
Ifrd1	1.0116	5.84384	1.57983	0.135191	0.743998	-4.48604
Tm2d2	-3.65061	2.82031	-1.57812	0.135584	0.743998	-4.56014
Smurf1	1.67724	5.60192	1.57771	0.135677	0.743998	-4.49687
Ccdc15	3.05798	0.347563	1.57689	0.135866	0.743998	-4.57013
Gm9054	-0.935389	-3.93841	-1.57617	0.136033	0.743998	-4.4923
Ghitm	1.57662	6.18489	1.57593	0.136088	0.743998	-4.47092
Chad	-2.45575	-2.86408	-1.57585	0.136105	0.743998	-4.53733
H2-M3	2.83552	2.80598	1.57548	0.136191	0.743998	-4.56046
Zfp488	-1.25415	-3.68894	-1.57457	0.136402	0.743998	-4.50538
Gm4285	-2.00543	-2.63266	-1.57438	0.136444	0.743998	-4.54376
Dph3	2.35667	2.85651	1.5743	0.136464	0.743998	-4.56008
Xpnpep3	-2.50463	2.31618	-1.57412	0.136506	0.743998	-4.56432
Jakmip2	1.04483	-4.09702	1.57396	0.136541	0.743998	-4.48721
Chst10	2.0042	-3.01503	1.57349	0.136652	0.743998	-4.53299
Cenpn	-2.3064	-3.50113	-1.57348	0.136652	0.743998	-4.51453
Hoxb4	3.45521	-1.40053	1.57272	0.136829	0.743998	-4.56472
Ier2	2.3557	-2.64001	1.57149	0.137115	0.743998	-4.54388
Snx25	3.04399	1.32988	1.57133	0.13715	0.743998	-4.5689
Kti12	-2.20251	2.17173	-1.57119	0.137183	0.743998	-4.56537
Txnl4a	1.60104	5.43486	1.57111	0.137202	0.743998	-4.50475
Exoc1	-1.52941	5.65423	-1.57104	0.137217	0.743998	-4.49611
Cpsf3	-1.20143	6.14577	-1.57088	0.137256	0.743998	-4.47418
Ate1	-1.03365	5.44437	-1.57071	0.137294	0.743998	-4.50447
Acy1	2.4433	1.51911	1.5706	0.137321	0.743998	-4.56836
Thoc7	2.90291	2.3483	1.56974	0.137521	0.743998	-4.56438
Cdca7	3.51963	1.05203	1.56968	0.137534	0.743998	-4.56967
Tmem184c	-2.0483	3.27373	-1.5695	0.137576	0.743998	-4.55596
Arfip2	1.71657	4.55394	1.56861	0.137783	0.743998	-4.53283
Morc2a	1.1682	5.92373	1.56793	0.137942	0.743998	-4.48524
Nlrp1a	1.84882	3.09508	1.56772	0.137989	0.743998	-4.55815
Kdm8	-2.7391	-2.55495	-1.56769	0.137998	0.743998	-4.54633
Rrp9	-3.28579	0.239272	-1.56759	0.138021	0.743998	-4.5706
Apbb2	-1.2523	6.09566	-1.56734	0.138078	0.743998	-4.47748
Nprl3	-2.88506	1.30146	-1.5667	0.138227	0.743998	-4.56922
Senp2	-0.922094	7.05701	-1.56661	0.13825	0.743998	-4.42647
Ddx58	-0.844361	5.51365	-1.56644	0.138289	0.743998	-4.50264
Il3ra	-1.39366	-3.9057	-1.56608	0.138373	0.743998	-4.49575
Rasgrp3	0.327841	9.62433	1.56595	0.138403	0.743998	-4.39436
Calml4	-1.75875	-3.44982	-1.56516	0.138587	0.743998	-4.51812
Adar	-2.35802	3.21405	-1.56512	0.138598	0.743998	-4.55701
Add2	1.12917	-3.98474	1.56501	0.138624	0.743998	-4.49306
Gpatch2	1.91518	4.42781	1.56498	0.13863	0.743998	-4.53636
Ddhd2	1.48281	5.12722	1.56461	0.138716	0.743998	-4.51676
Cd99l2	3.14853	1.58475	1.56422	0.138807	0.743998	-4.56847
Ap1s1	-3.23122	-0.550458	-1.56398	0.138863	0.743998	-4.57003
Nmnat1	-2.24566	-2.78267	-1.56383	0.138898	0.743998	-4.54099
Abca17	-1.83011	-3.28134	-1.56333	0.139016	0.743998	-4.52512
Itga9	1.33449	7.31228	1.56293	0.139111	0.743998	-4.41307
Glo1	2.9303	2.66519	1.56255	0.139199	0.743998	-4.56254
Slc16a11	-0.777697	-3.97189	-1.56249	0.139215	0.743998	-4.49407
Gm6793	2.81524	5.94339	1.56175	0.139387	0.743998	-4.48583
Il1bos	2.26029	-3.47404	1.5617	0.139398	0.743998	-4.51765
Nsf	-1.38687	4.3445	-1.56074	0.139625	0.743998	-4.53877
Cbx2	-2.67469	-2.5317	-1.56074	0.139625	0.743998	-4.54756
C87436	2.27739	2.76235	1.56071	0.139632	0.743998	-4.56185
Ss18l1	2.42429	3.82964	1.56027	0.139736	0.743998	-4.54881
Zfp111	1.94541	3.3815	1.56021	0.139749	0.743998	-4.55537
Rps27a	-0.811184	6.8471	-1.56006	0.139786	0.743998	-4.44087
Slc2a3	3.35527	1.96806	1.55944	0.139932	0.743998	-4.56713
Fra10ac1	3.04891	2.26632	1.55821	0.140222	0.743998	-4.5656
Ing4	2.12118	4.03249	1.55803	0.140263	0.743998	-4.54545
Adam1b	-1.31396	-3.92092	-1.55803	0.140263	0.743998	-4.49688
Rc3h1	-0.690987	7.75491	-1.55732	0.140432	0.743998	-4.39061
Ube2g1	-2.33356	4.26755	-1.55729	0.140439	0.743998	-4.54084
Brk1	0.779105	6.99375	1.55677	0.140563	0.743998	-4.43389
Snx5	-0.481154	9.34319	-1.5567	0.140578	0.743998	-4.37554
Lrrc51	-3.57527	-1.51597	-1.55658	0.140608	0.743998	-4.56454
Clcn4-2	0.918003	6.5096	1.55634	0.140666	0.743998	-4.46016
Npr2	0.995222	-4.10706	1.55604	0.140735	0.743998	-4.49098
Camk2a	-2.62474	2.59297	-1.55559	0.140842	0.743998	-4.56355
Csnk1g1	-1.10827	5.96974	-1.55539	0.14089	0.743998	-4.48619
Vps36	-3.64809	0.0397467	-1.55533	0.140904	0.743998	-4.57116
C78339	-3.67648	-1.61612	-1.55525	0.140922	0.743998	-4.56355
Snx17	1.34538	6.73133	1.55516	0.140945	0.743998	-4.44889
Cd48	1.79047	4.87864	1.55465	0.141065	0.743998	-4.52597
Thap6	2.53407	-0.5501	1.55394	0.141234	0.743998	-4.57054
Dbt	-2.54423	3.67778	-1.55363	0.141307	0.743998	-4.55183
2610307P16Rik	-1.41337	-3.78471	-1.55295	0.141469	0.743998	-4.50463
Mdfic	-2.08264	-3.50946	-1.5526	0.141554	0.743998	-4.51765
4930507D05Rik	-1.78461	-3.29684	-1.55251	0.141574	0.743998	-4.52613
Ncf2	0.885898	7.11405	1.5525	0.141576	0.743998	-4.42881
Zmat5	-3.30815	-0.828267	-1.55241	0.141598	0.743998	-4.56988
Tmem167b	-2.20976	3.98303	-1.55217	0.141656	0.743998	-4.54695
Trim66	-2.73699	-3.25847	-1.55204	0.141686	0.743998	-4.5276
9230116L04Rik	-2.61106	-2.68163	-1.55196	0.141705	0.743998	-4.54489
Rabgap1	1.59027	5.95414	1.55188	0.141725	0.743998	-4.48771
Trappc6a	3.20177	-1.12257	1.55169	0.141771	0.743998	-4.56832
Gsto1	3.27106	-1.00756	1.55167	0.141775	0.743998	-4.56906
Nlgn1	-1.75949	-3.86153	-1.55165	0.14178	0.743998	-4.50103
Eef1d	-1.38309	4.59767	-1.55152	0.14181	0.743998	-4.53394
C030037D09Rik	-2.60675	-3.31095	-1.55123	0.14188	0.743998	-4.5258
Ptpra	-0.686661	7.16861	-1.55122	0.141881	0.743998	-4.42627
Arid3a	2.68781	4.23475	1.55104	0.141926	0.743998	-4.54223
Tsen2	-3.38462	-0.786567	-1.55071	0.142004	0.743998	-4.57013
Prmt10	2.88914	3.42026	1.54993	0.14219	0.743998	-4.55572
Ccl27a	-2.91146	0.414141	-1.54943	0.142309	0.743998	-4.57145
Cul1	0.680755	7.37282	1.54917	0.142371	0.743998	-4.41571
Dusp8	2.17764	-3.43366	1.54834	0.14257	0.743998	-4.52149
Itm2c	0.553814	7.75248	1.54762	0.142743	0.743998	-4.39585
Tlr5	1.53469	4.66288	1.54669	0.142966	0.743998	-4.53293
Pcdh7	2.8172	-2.6981	1.54666	0.142973	0.743998	-4.54505
Ap1s2	1.34529	5.42733	1.54663	0.14298	0.743998	-4.50965
Cep350	0.632578	7.89057	1.54607	0.143116	0.743998	-4.38974
Stxbp2	1.06937	5.41843	1.54588	0.143161	0.743998	-4.5101
Eif4a3	-1.36165	4.7493	-1.54586	0.143165	0.743998	-4.53079
Fkbp1a	1.65401	4.88647	1.5456	0.143228	0.743998	-4.52708
Kras	0.816325	5.95204	1.54509	0.143351	0.743998	-4.48942
9030624J02Rik	0.794331	5.71628	1.54429	0.143543	0.743998	-4.49928
Fam49b	0.360642	7.93517	1.54407	0.143596	0.743998	-4.38872
Tmc6	2.96292	2.96079	1.54407	0.143597	0.743998	-4.56123
Wdr18	-2.70163	0.975529	-1.54341	0.143757	0.743998	-4.57115
Gpr56	-0.533953	9.30058	-1.54338	0.143764	0.743998	-4.38489
Mrps34	3.00794	0.220455	1.54302	0.14385	0.743998	-4.5718
Gbp9	-1.92166	4.57441	-1.54281	0.1439	0.743998	-4.53563
Hltf	0.6787	6.80056	1.54279	0.143905	0.743998	-4.44947
Btla	-2.44619	-2.38419	-1.54274	0.143918	0.743998	-4.55241
1600023N17Rik	-2.71038	-3.45472	-1.54271	0.143926	0.743998	-4.52154
Cdh5	-3.04725	-2.45983	-1.54253	0.143968	0.743998	-4.55088
Ube2d2b	2.38756	-3.02733	1.54215	0.144059	0.743998	-4.53657
Sgk1	0.659366	8.28018	1.54159	0.144196	0.743998	-4.37619
Ube2e1	1.81789	2.34269	1.54129	0.14427	0.743998	-4.56616
Aggf1	-0.907923	4.8399	-1.54126	0.144276	0.743998	-4.529
Foxn2	-1.40285	4.93828	-1.54083	0.14438	0.743998	-4.52631
Atp5h	2.05678	3.64804	1.54081	0.144385	0.743998	-4.55341
Stk3	-2.01583	3.56939	-1.53997	0.144588	0.743998	-4.55459
Pcdhga8	3.20219	0.831554	1.53967	0.14466	0.743998	-4.57156
Dhx36	-2.02974	4.91476	-1.5396	0.144678	0.743998	-4.52716
Fsd2	-2.03349	-3.26802	-1.53956	0.144688	0.743998	-4.52906
Nol7	-1.87337	4.50817	-1.53918	0.144781	0.743998	-4.53766
Atpaf2	-3.48818	0.58017	-1.53854	0.144935	0.743998	-4.57189
Gpx3	-1.42905	-3.57487	-1.53843	0.144962	0.743998	-4.51724
Gale	-1.45712	-3.7691	-1.53828	0.144998	0.743998	-4.50829
Fzd5	2.30729	0.912268	1.53813	0.145034	0.743998	-4.57151
Prc1	1.96563	-3.18767	1.53675	0.145371	0.743998	-4.53221
Sgce	1.8005	5.47029	1.53639	0.145458	0.743998	-4.51006
Gadd45a	-1.68626	-3.7225	-1.53605	0.14554	0.743998	-4.51097
Rmnd1	-2.67418	4.2747	-1.53594	0.145568	0.743998	-4.54311
Fam110a	-2.49572	4.46234	-1.53501	0.145795	0.743998	-4.53922
Gm10677	-3.24404	-1.52506	-1.535	0.145798	0.743998	-4.5658
Cd79b	-3.622	0.606296	-1.53468	0.145876	0.743998	-4.57206
Nupr1	-2.74968	1.45621	-1.53451	0.145917	0.743998	-4.57047
Fam20a	-1.17742	-3.80077	-1.53442	0.145938	0.743998	-4.50747
1810026J23Rik	-3.53151	2.22788	-1.53437	0.145953	0.743998	-4.56725
Pigo	-2.22132	3.0386	-1.53388	0.146071	0.743998	-4.56122
Zc3hav1	1.94631	3.58707	1.53339	0.146192	0.743998	-4.55492
Sfi1	0.807936	5.52601	1.53311	0.146259	0.743998	-4.50872
Ttc39a	0.938109	-4.11853	1.53288	0.146316	0.743998	-4.49589
Cdc26	0.917328	4.21267	1.53281	0.146334	0.743998	-4.5447
Scamp1	-0.594554	6.7892	-1.53265	0.146372	0.743998	-4.45357
Ndufs6	2.45039	1.36205	1.53251	0.146406	0.743998	-4.57084
Katnb1	-2.37894	-1.56905	-1.53224	0.146474	0.743998	-4.56553
Ppp2r1b	1.99867	4.59252	1.53109	0.146756	0.743998	-4.53671
Pbxip1	-0.941511	7.45877	-1.53088	0.146807	0.743998	-4.41941
Gpr157	-2.12512	2.79989	-1.53073	0.146845	0.743998	-4.56358
Ube2i	0.635699	7.3349	1.52992	0.147043	0.743998	-4.42629
Clstn3	-0.926377	-3.81342	-1.52913	0.147236	0.743998	-4.50789
AW011738	2.36713	-1.46607	1.52858	0.147373	0.743998	-4.56677
Tmem127	1.24641	6.76698	1.52836	0.147426	0.743998	-4.45617
Zfp938	2.33364	0.21484	1.52809	0.147494	0.743998	-4.57253
Rapgef6	0.828171	7.37256	1.52809	0.147495	0.743998	-4.42514
Fndc4	-2.68944	-2.2764	-1.52771	0.147587	0.743998	-4.55579
Pik3r6	-1.54162	3.71754	-1.52739	0.147666	0.743998	-4.55362
Zfp945	-1.79817	2.5366	-1.52711	0.147736	0.743998	-4.56579
Rnf149	1.92528	4.49425	1.52696	0.147772	0.743998	-4.53949
Sco2	3.162	-1.748	1.52685	0.1478	0.743998	-4.56387
Tufm	-2.71653	1.13667	-1.52621	0.147958	0.743998	-4.5717
Fam134b	0.619889	7.7103	1.52541	0.148156	0.743998	-4.40949
Ppp1r1a	-2.53988	-3.34907	-1.5246	0.148357	0.743998	-4.52839
Tmem53	2.90867	-2.40614	1.52367	0.148587	0.743998	-4.55372
Sec23ip	1.98482	3.81639	1.5234	0.148653	0.743998	-4.55251
Gpr180	-3.21462	1.75522	-1.5233	0.148679	0.743998	-4.57006
Epb4.1l1	3.37631	-0.813269	1.52294	0.148767	0.743998	-4.57146
Emb	2.02986	-3.7506	1.52229	0.148929	0.743998	-4.51226
Nfam1	0.756825	7.78488	1.52194	0.149018	0.743998	-4.40781
Pln	2.66152	1.18359	1.52125	0.149188	0.743998	-4.57185
Rgl3	-2.52546	2.6616	-1.52117	0.149209	0.743998	-4.56529
Arg1	-2.53356	-2.777	-1.52095	0.149263	0.743998	-4.54589
Arv1	2.68674	0.0762905	1.52088	0.149281	0.743998	-4.57285
Zdhhc6	-2.89435	2.9922	-1.5205	0.149376	0.743998	-4.56262
Sar1a	1.30909	6.23562	1.52039	0.149403	0.743998	-4.48345
Rps26	0.899244	6.52909	1.5185	0.149875	0.743998	-4.47081
Trank1	2.37084	-2.3066	1.51828	0.14993	0.743998	-4.55606
Ankrd34b	2.62091	-2.40479	1.51819	0.149953	0.743998	-4.55424
1700021K19Rik	1.95697	4.07625	1.51779	0.150052	0.743998	-4.54882
Lpcat3	-1.15665	7.17724	-1.51747	0.150133	0.743998	-4.43961
4930479D17Rik	-2.57601	-2.75983	-1.51606	0.150486	0.743998	-4.54684
Ms4a4d	-1.09383	-3.57808	-1.51567	0.150583	0.743998	-4.52102
Zfp871	0.417638	9.44049	1.51564	0.15059	0.743998	-4.42325
Foxm1	3.19872	-1.54709	1.51551	0.150624	0.743998	-4.5668
Ahdc1	-2.54727	3.40896	-1.51537	0.150657	0.743998	-4.55868
Rab32	1.53341	4.42541	1.51507	0.150734	0.743998	-4.54243
1700012D01Rik	-1.00063	-3.82978	-1.51503	0.150744	0.743998	-4.50996
Adcy6	3.36511	-0.62929	1.51493	0.150768	0.743998	-4.57235
Zfp940	-2.50627	-1.34815	-1.51443	0.150894	0.743998	-4.56867
Rgp1	-2.38037	4.20948	-1.51374	0.151069	0.743998	-4.54685
Baz1a	0.854343	6.02953	1.51369	0.151081	0.743998	-4.49378
2810025M15Rik	1.81155	4.07835	1.51359	0.151106	0.743998	-4.54922
Zdhhc14	1.53392	4.3188	1.51309	0.151231	0.743998	-4.54483
Ncoa3	-0.449025	8.00265	-1.51306	0.15124	0.743998	-4.40357
Wdr62	-2.98348	-2.11801	-1.5127	0.151331	0.743998	-4.5597
Lrrc8c	-1.2025	-3.97806	-1.51258	0.15136	0.743998	-4.50468
Tiprl	-1.75924	4.97239	-1.51252	0.151375	0.743998	-4.52963
Kptn	3.15237	-1.02119	1.51217	0.151464	0.743998	-4.5711
Satb2	-2.89541	-2.13493	-1.51176	0.151566	0.743998	-4.55951
BC035044	1.12055	5.64234	1.51145	0.151645	0.743998	-4.50891
Nckap5l	-1.20934	5.68711	-1.51074	0.151825	0.743998	-4.50747
Eif2s2	0.960701	5.72306	1.51067	0.151841	0.743998	-4.50619
Ctsa	0.466179	9.5865	1.51039	0.151913	0.743998	-4.44557
Lima1	-1.99448	3.67243	-1.51022	0.151956	0.743998	-4.55579
Tmem88b	1.73944	-3.74377	1.50961	0.152109	0.743998	-4.51499
Klhl6	-1.2407	5.20924	-1.50922	0.152208	0.743998	-4.52342
Arhgef25	-2.77721	-2.12902	-1.50906	0.152248	0.743998	-4.55982
Hnmt	-2.13373	4.10994	-1.50826	0.152453	0.743998	-4.54923
Snora81	-0.71545	-4.019	-1.50766	0.152606	0.743998	-4.50448
Ctdsp2	1.20643	6.51669	1.50669	0.15285	0.743998	-4.47497
Nhs	2.38248	-1.25282	1.50646	0.152909	0.743998	-4.5699
Fkbpl	-2.21481	-3.52765	-1.5049	0.153307	0.743998	-4.52485
B9d2	-3.6128	0.987508	-1.50483	0.153325	0.743998	-4.57305
Dip2b	-0.297463	9.75213	-1.5046	0.153384	0.743998	-4.47636
Prpsap2	-0.668444	5.99844	-1.50449	0.15341	0.743998	-4.49723
Hars2	2.31979	3.43734	1.50417	0.153493	0.743998	-4.55927
Sox30	-1.39974	-3.69782	-1.50398	0.15354	0.743998	-4.51806
Neil1	-2.35822	-2.69859	-1.50389	0.153563	0.743998	-4.54956
1810022K09Rik	3.12357	0.774368	1.50341	0.153686	0.743998	-4.57342
Grtp1	-1.60429	-3.76525	-1.50308	0.15377	0.743998	-4.51526
Ubr2	-0.802491	6.97195	-1.50302	0.153787	0.743998	-4.45521
Rhou	2.07221	-3.41134	1.50195	0.154059	0.743998	-4.52962
Prdm2	-0.825225	6.92222	-1.50169	0.154126	0.743998	-4.45803
Prkd1	0.870886	-4.13192	1.50157	0.154156	0.743998	-4.5026
AI837181	-1.79399	4.69036	-1.50119	0.154254	0.743998	-4.53833
Teddm1	1.6768	-3.7623	1.50073	0.154372	0.743998	-4.51585
Icmt	2.48704	3.9568	1.50071	0.154377	0.743998	-4.55253
Ccdc53	2.20015	3.07258	1.50063	0.154396	0.743998	-4.56332
Bcat2	-2.94133	1.53414	-1.50034	0.154472	0.743998	-4.57203
Orai3	2.17797	4.35486	1.49949	0.15469	0.743998	-4.54568
Ska2	2.1525	-3.51238	1.49943	0.154704	0.743998	-4.52633
Fam117a	-3.67188	0.76456	-1.49931	0.154736	0.743998	-4.57363
Tram2	-3.43582	1.61715	-1.49928	0.154744	0.743998	-4.57183
Rad9a	-1.33237	4.32056	-1.49928	0.154744	0.743998	-4.54637
Eif3h	1.61275	5.11702	1.49857	0.154925	0.743998	-4.52783
Vps29	-1.78825	3.52612	-1.49857	0.154926	0.743998	-4.55868
Rnf14	2.56278	4.76036	1.49836	0.154981	0.743998	-4.53707
Arrdc1	0.891497	5.89866	1.49807	0.155055	0.743998	-4.50253
Gstp1	1.94502	3.73903	1.49797	0.155081	0.743998	-4.55599
Pcnx	1.93666	5.09988	1.49787	0.155106	0.743998	-4.52842
Uvssa	1.02543	5.67612	1.49776	0.155133	0.743998	-4.51055
Hivep2	-2.53286	3.02708	-1.49776	0.155133	0.743998	-4.56394
Athl1	2.70494	0.365931	1.49766	0.155159	0.743998	-4.57398
Mtss1	-0.682776	6.58013	-1.49764	0.155165	0.743998	-4.47494
Zdhhc24	1.83832	5.30357	1.49743	0.15522	0.743998	-4.52262
Gsr	-2.71977	0.476008	-1.49735	0.155239	0.743998	-4.57395
Il2rg	3.56014	-0.713941	1.4969	0.155356	0.743998	-4.57307
Car15	-1.65643	-3.35236	-1.49662	0.155429	0.743998	-4.53247
Slc22a21	-2.81193	-2.04182	-1.4966	0.155433	0.743998	-4.5621
Spata5l1	-1.79385	-3.08289	-1.49659	0.155435	0.743998	-4.54076
Fcer1g	-0.370038	9.96326	-1.49652	0.155452	0.743998	-4.52582
Slu7	1.49602	4.7791	1.49637	0.155492	0.743998	-4.5369
Tmem151a	-0.800048	-3.8221	-1.49585	0.155626	0.743998	-4.51412
Tmem18	3.35928	3.68226	1.49531	0.155764	0.743998	-4.55699
Trappc12	-1.63832	5.16989	-1.49524	0.155784	0.743998	-4.52688
Cnrip1	2.63762	2.47389	1.49521	0.155793	0.743998	-4.56819
Zfp398	-2.43628	3.54123	-1.49493	0.155864	0.743998	-4.5588
Eri3	-2.13736	4.22701	-1.4947	0.155923	0.743998	-4.54861
Zfp429	2.41619	2.53008	1.49462	0.155945	0.743998	-4.56788
Mapkapk5	-1.69939	2.77906	-1.49422	0.156049	0.743998	-4.5662
Cdc73	2.01934	4.16733	1.49416	0.156062	0.743998	-4.54972
Ccrl2	3.35741	-1.05979	1.4935	0.156234	0.743998	-4.57189
Dab1	1.37737	-3.90148	1.49336	0.15627	0.743998	-4.51122
1700102H20Rik	-1.39421	-3.93095	-1.49298	0.156369	0.743998	-4.5103
Rap1gap2	-2.41553	3.05074	-1.49278	0.15642	0.743998	-4.56409
Med20	-2.36959	4.11634	-1.49243	0.156511	0.743998	-4.55078
Adcy9	2.35696	4.25775	1.49231	0.156541	0.743998	-4.54832
Rab6a	1.06511	5.09136	1.49215	0.156584	0.743998	-4.52956
Sharpin	1.22789	4.81223	1.49187	0.156657	0.743998	-4.53673
Npm3	-1.60886	-3.52846	-1.49158	0.15673	0.743998	-4.52702
Gna14	-2.73697	-2.62919	-1.49155	0.15674	0.743998	-4.55232
Gtf2h1	1.96606	3.59453	1.49088	0.156912	0.743998	-4.5585
Thap11	3.1769	0.853528	1.49079	0.156937	0.743998	-4.57394
B4galnt4	1.54236	-3.6285	1.49036	0.157048	0.743998	-4.52338
Taf13	2.28006	2.9646	1.48977	0.157202	0.743998	-4.56504
Tsc1	-1.7993	4.99754	-1.48945	0.157284	0.743998	-4.53246
Smdt1	2.25606	3.16945	1.4891	0.157376	0.743998	-4.56327
Mzf1	-1.95934	-3.02927	-1.48818	0.157615	0.743998	-4.54329
Gsn	-2.14139	-3.47278	-1.48817	0.157617	0.743998	-4.5296
Ift80	3.2535	-0.890528	1.48766	0.157752	0.743998	-4.57298
Csnk1d	0.935283	6.60511	1.48754	0.157783	0.743998	-4.47701
Rab11fip1	-1.01613	-3.83717	-1.4874	0.157819	0.743998	-4.51516
Gpsm1	2.18404	1.49096	1.48718	0.157878	0.743998	-4.57284
Gm14295	2.48928	0.116886	1.48716	0.157881	0.743998	-4.57449
B3gnt7	1.3522	-3.90657	1.48678	0.157981	0.743998	-4.51237
Enoph1	3.34362	0.505138	1.48675	0.157988	0.743998	-4.57445
Hist1h2bp	2.03576	-2.96156	1.48648	0.15806	0.743998	-4.54526
Spryd7	-2.76261	-1.33758	-1.48641	0.158079	0.743998	-4.57039
Srek1ip1	0.98825	3.91177	1.48502	0.158442	0.743998	-4.55474
Anxa11	-2.86085	0.310258	-1.4849	0.158473	0.743998	-4.5746
Ppm1a	2.32972	3.81877	1.48476	0.158509	0.743998	-4.55609
Ccpg1	0.692754	7.02902	1.48416	0.158667	0.743998	-4.45965
Arl11	-2.50389	3.54435	-1.48202	0.159228	0.743998	-4.55986
Fbxo41	1.98293	-3.46554	1.48185	0.159272	0.743998	-4.53087
Ormdl1	-2.98719	1.94284	-1.48177	0.159294	0.743998	-4.57161
Slitrk1	1.59249	-3.80436	1.4817	0.159314	0.743998	-4.51767
Cx3cl1	1.4617	-3.81073	1.48121	0.159442	0.743998	-4.51749
2010109I03Rik	3.36058	-1.36691	1.48036	0.159665	0.743998	-4.57051
Zranb3	3.38328	-1.27584	1.47955	0.159879	0.743998	-4.57126
Thoc6	-2.39885	-1.18013	-1.47821	0.160233	0.743998	-4.57197
Atg2a	3.20071	3.28628	1.4777	0.160367	0.743998	-4.563
Eid3	3.40939	-1.98777	1.47743	0.16044	0.743998	-4.56428
Itgb1	-0.673071	7.79115	-1.4767	0.160633	0.743998	-4.43127
Tpt1	0.630903	8.10362	1.4765	0.160686	0.743998	-4.42169
Pvrl4	-1.14633	6.22355	-1.47623	0.160756	0.743998	-4.49567
Tusc3	2.80692	0.40108	1.47612	0.160786	0.743998	-4.57501
Rnpc3	1.47862	4.84061	1.47539	0.160981	0.743998	-4.53838
Pdcd6ip	0.810718	7.28418	1.47497	0.161092	0.743998	-4.45224
Slc7a6	2.81724	2.47228	1.47487	0.161118	0.743998	-4.56946
Fbxw17	-2.11215	-3.13326	-1.4748	0.161136	0.743998	-4.54219
Chrdl1	1.50466	-3.72759	1.47435	0.161257	0.743998	-4.52229
Clstn1	-0.917079	6.21749	-1.47412	0.161318	0.743998	-4.49646
[truncated: 20,431 more rows]

## Sheet: 16p11dup-Veh vs WT-Veh
Supplementary Data 2: Differential expression gene list
16p11dup-Veh vs WT-Veh
Gene name	logFC	AveExpr	t	two-tailed uncorrected P.Value	adj.P.Val	B
Mansc4	5.25387	-3.12227	5.26832	9.75456e-05	0.982031	-4.44909
2310061J03Rik	5.60874	-2.11876	5.09684	0.0001352	0.982031	-4.51185
Arhgap26	6.00055	0.573509	4.96203	0.000175204	0.982031	-4.54524
3110009E18Rik	6.84428	-1.53803	4.81297	0.000233947	0.982031	-4.5331
Pard6a	6.32759	-1.81707	4.73418	0.000272862	0.982031	-4.52688
Spock1	4.40512	-2.64597	4.70553	0.000288613	0.982031	-4.49357
Tusc2	4.77264	-1.06046	4.2576	0.000701778	0.982031	-4.54733
Doc2g	5.32169	-2.26395	4.22001	0.00075675	0.982031	-4.52006
Rassf8	5.29478	-2.01601	4.21338	0.000766894	0.982031	-4.52851
Prkar2b	4.61355	-3.02101	4.18438	0.000812911	0.982031	-4.48356
Ppp4r2	1.83622	6.01468	4.15015	0.000870885	0.982031	-4.35695
Cox7c	-1.96385	6.22418	-4.03121	0.00110709	0.982031	-4.33762
Rps11	-1.07659	6.81158	-3.97106	0.00125043	0.982031	-4.24846
Rarb	3.64977	-3.46765	3.92633	0.00136911	0.982031	-4.45856
Ccr1l1	4.70264	-3.05367	3.82973	0.00166592	0.982031	-4.49202
Trmt12	-5.68103	2.13075	-3.82284	0.0016894	0.982031	-4.54879
Mgst3	6.72253	-2.08079	3.7757	0.00185952	0.982031	-4.53433
Sult1a1	-1.44641	6.88643	-3.76643	0.00189495	0.982031	-4.25578
Saysd1	5.67897	0.889529	3.71796	0.00209164	0.982031	-4.55724
Hist2h3c2	3.57875	-2.37165	3.70479	0.00214853	0.982031	-4.52665
Tsr2	-6.07939	-0.882992	-3.69341	0.00219898	0.982031	-4.55582
Mkl1	-3.4703	4.89288	-3.67073	0.0023031	0.982031	-4.47744
Bcas2	2.56453	2.65304	3.63135	0.00249578	0.982031	-4.54592
Spc25	2.92034	-3.53264	3.61099	0.00260171	0.982031	-4.46621
Ppp2r2d	-4.98219	3.32425	-3.57185	0.00281816	0.982031	-4.53608
1810032O08Rik	6.46876	-0.541985	3.57134	0.00282108	0.982031	-4.55891
2023-09-07	-1.67833	5.36976	-3.55947	0.0028903	0.982031	-4.45196
Asnsd1	-4.95027	3.59922	-3.50211	0.00324961	0.982031	-4.53161
Ap3s1	5.12773	1.15001	3.48731	0.00334942	0.982031	-4.55935
Ralgapa1	-1.61034	5.89082	-3.4858	0.00335978	0.982031	-4.41344
1700037H04Rik	4.11423	-2.34185	3.47448	0.00343841	0.982031	-4.53286
Adam3	5.25808	-0.193327	3.42692	0.00378932	0.982031	-4.56147
Dph3	5.13427	2.85651	3.39831	0.00401744	0.982031	-4.54732
Slco1c1	3.5079	-2.44725	3.32786	0.00463941	0.982031	-4.53307
Kdsr	-4.53392	2.94706	-3.30151	0.00489598	0.982031	-4.54789
Zfp382	5.59338	-1.23112	3.28933	0.00501928	0.982031	-4.55832
Dera	-5.80798	0.52705	-3.27837	0.00513286	0.982031	-4.56349
Lysmd3	3.76883	2.79393	3.27704	0.0051468	0.982031	-4.55039
Msantd1	5.01674	-2.49839	3.2695	0.00522666	0.982031	-4.53293
Slmap	1.2933	6.96005	3.26622	0.00526175	0.982031	-4.30196
Kiss1r	2.74638	-3.24343	3.24044	0.00554611	0.982031	-4.5019
Mob1b	5.27075	1.16326	3.22695	0.00570079	0.982031	-4.56284
Cntnap1	-5.2556	-1.69611	-3.21859	0.00579889	0.982031	-4.55327
Prickle2	2.31731	-3.67964	3.19515	0.00608288	0.982031	-4.47444
Cnbd2	2.75833	-3.48601	3.18285	0.00623738	0.982031	-4.4894
Gsdmcl-ps	4.4984	-1.85349	3.18254	0.00624137	0.982031	-4.55113
Ears2	-4.34665	-2.45704	-3.14957	0.0066751	0.982031	-4.53736
Cpsf1	-3.73052	5.00116	-3.14569	0.00672816	0.982031	-4.49413
Piezo1	-2.07215	5.56939	-3.13997	0.00680695	0.982031	-4.46157
Wdr8	5.50081	0.130295	3.13726	0.00684468	0.982031	-4.56553
Lamtor1	-3.88778	4.07085	-3.1294	0.00695517	0.982031	-4.52947
Drg2	-4.00252	2.43545	-3.12886	0.00696282	0.982031	-4.55692
Nhlrc1	5.63635	-2.02865	3.12542	0.00701177	0.982031	-4.54877
B4galt7	4.12674	-2.61032	3.12452	0.00702458	0.982031	-4.53326
0610031J06Rik	1.92503	6.49816	3.11665	0.00713803	0.982031	-4.38131
Seh1l	-3.02977	5.00428	-3.09905	0.00739837	0.982031	-4.49614
D330045A20Rik	-4.9257	-1.92968	-3.09515	0.00745737	0.982031	-4.55142
Cyth1	-4.86186	2.30894	-3.07693	0.00773888	0.982031	-4.5589
Myo1e	4.24956	1.89069	3.07196	0.00781759	0.982031	-4.56187
Ttc32	4.72901	0.529921	3.07193	0.00781804	0.982031	-4.56627
Ap1s2	2.68541	5.42733	3.06548	0.00792119	0.982031	-4.47509
Pstpip1	3.835	-2.80175	3.05414	0.00810594	0.982031	-4.52877
S100a11	3.44997	-1.45967	3.04746	0.00821673	0.982031	-4.55964
Opn3	5.12454	-1.03299	3.04534	0.00825231	0.982031	-4.56383
Sp3os	-6.466	-0.320825	-3.03837	0.00836986	0.982031	-4.56649
Atp8a1	0.759981	8.71664	3.03828	0.00837137	0.982031	-3.88016
Med19	5.04165	2.08431	3.03686	0.00839568	0.982031	-4.56123
Kctd21	4.72421	2.69293	3.03281	0.00846501	0.982031	-4.55616
Rusc2	-5.19672	2.84885	-3.03027	0.00850876	0.982031	-4.55451
Pou5f2	6.02008	0.615324	3.02986	0.00851594	0.982031	-4.56675
Vax1	4.43638	-3.5003	3.02777	0.00855211	0.982031	-4.49592
Fth1	-0.559295	9.38247	-3.01727	0.00873642	0.982031	-3.56089
2900097C17Rik	1.3194	6.81645	3.01486	0.00877913	0.982031	-4.35395
Cox6c	4.74464	2.94886	3.00985	0.00886894	0.982031	-4.55372
Mylip	1.8597	7.069	3.00978	0.00887016	0.982031	-4.31927
Arsg	-3.72706	3.88246	-3.00496	0.00895748	0.982031	-4.53786
Morc3	0.690878	6.89139	2.99159	0.00920371	0.982031	-4.34697
Xkr8	-4.63913	0.228784	-2.98957	0.0092414	0.982031	-4.56755
Rab26os	-4.91718	0.12454	-2.98952	0.00924236	0.982031	-4.56755
Rpl11	-0.824579	7.45507	-2.98923	0.0092479	0.982031	-4.25732
Igdcc4	5.52529	-3.10532	2.97669	0.00948597	0.982031	-4.51925
Fam189b	3.84335	-3.36947	2.97663	0.00948726	0.982031	-4.50612
1110046J04Rik	3.92399	-3.51699	2.96343	0.00974437	0.982031	-4.49806
Pabpn1	-3.44523	4.56143	-2.96291	0.00975462	0.982031	-4.52003
Exosc5	-3.83372	3.48583	-2.95951	0.0098222	0.982031	-4.54698
Smad4	-2.36103	4.71009	-2.93886	0.0102415	0.982031	-4.51568
Fchsd1	5.15871	-0.747169	2.91982	0.0106437	0.982031	-4.56722
Ivns1abp	0.682295	12.4375	2.91099	0.0108357	0.982031	-3.13425
Tsen54	4.67994	-0.999377	2.90517	0.0109638	0.982031	-4.56621
Stard13	1.33363	-3.95581	2.90178	0.0110391	0.982031	-4.47126
Top2a	5.6898	-0.998596	2.89925	0.0110959	0.982031	-4.56631
2610002M06Rik	4.49306	2.854	2.89779	0.0111285	0.982031	-4.55712
D3Bwg0562e	3.77055	-2.62491	2.89551	0.01118	0.982031	-4.53951
Rxfp4	-3.87591	-3.05698	-2.89052	0.0112932	0.982031	-4.52463
Mrps12	-5.49761	-0.847993	-2.88935	0.0113199	0.982031	-4.56726
Dennd4a	-0.735055	9.36465	-2.88872	0.0113344	0.982031	-3.64435
Zfp362	4.10388	3.42147	2.88074	0.0115186	0.982031	-4.54999
Polr1c	4.68953	1.64105	2.87577	0.0116346	0.982031	-4.56623
Ict1	4.83974	1.27591	2.87376	0.0116819	0.982031	-4.56759
Cdr1	2.93686	3.00747	2.87366	0.0116843	0.982031	-4.55587
Fbxo24	2.76136	-3.16598	2.86405	0.0119131	0.982031	-4.52104
Slc25a5	-1.50581	6.75572	-2.85808	0.0120576	0.982031	-4.38042
Gfer	-4.01437	3.03036	-2.85194	0.0122079	0.982031	-4.55607
Tmx2	3.35788	4.01123	2.84974	0.0122619	0.982031	-4.53952
Scube3	1.42574	-3.93095	2.84923	0.0122745	0.982031	-4.47626
Cd22	5.50143	0.157383	2.84719	0.0123252	0.982031	-4.56955
Ldb1	-1.17717	7.24667	-2.84552	0.0123669	0.982031	-4.31684
Man2a1	-2.60399	5.14496	-2.83534	0.012623	0.982031	-4.50259
Zfp367	4.37741	-2.46366	2.83376	0.0126633	0.982031	-4.54571
Rnf4	-1.77295	5.77015	-2.82838	0.0128012	0.982031	-4.46902
Ccndbp1	1.73774	5.66301	2.82716	0.0128327	0.982031	-4.4758
Rpusd3	4.66826	-0.711772	2.82639	0.0128527	0.982031	-4.56872
Gm10012	-2.65573	0.15668	-2.825	0.0128889	0.982031	-4.56987
Limd2	-1.57278	6.45399	-2.81661	0.0131082	0.982031	-4.41651
Zfp939	5.38783	-0.631691	2.81592	0.0131265	0.982031	-4.56908
Celsr1	3.54974	-3.70514	2.81115	0.0132531	0.982031	-4.494
Tnrc18	1.2527	6.48915	2.80427	0.0134379	0.982031	-4.41446
Pim1	4.90916	-2.22554	2.80234	0.0134901	0.982031	-4.55204
Atp5g1	-2.90508	4.90873	-2.80123	0.0135204	0.982031	-4.51419
Ascl2	5.84071	-2.30486	2.80112	0.0135232	0.982031	-4.55036
Tada1	4.9011	1.96185	2.79877	0.0135872	0.982031	-4.56593
Zfp940	-4.71188	-1.34815	-2.79658	0.0136472	0.982031	-4.56515
Nprl2	-4.69386	1.56683	-2.79262	0.0137565	0.982031	-4.56784
Fndc8	0.672231	-4.148	2.78484	0.0139731	0.982031	-4.46906
Nup153	1.19592	6.10062	2.78157	0.0140654	0.982031	-4.44964
Mfap3l	5.7111	-0.614019	2.78021	0.0141037	0.982031	-4.56965
Elmo1	-0.610724	9.4537	-2.77324	0.0143026	0.982031	-3.6672
E130317F20Rik	4.88921	-1.64857	2.77058	0.0143791	0.982031	-4.56235
Amy1	2.56709	-3.72188	2.769	0.0144247	0.982031	-4.49533
Dock3	3.56949	-2.60966	2.7566	0.0147884	0.982031	-4.54412
Mrpl17	-4.42935	4.06674	-2.75646	0.0147924	0.982031	-4.5412
Arl14ep	-3.0236	4.70157	-2.75119	0.0149494	0.982031	-4.52388
Nphp1	-4.87225	-1.74116	-2.74761	0.0150571	0.982031	-4.56161
Zfp668	4.07874	1.21896	2.74022	0.0152819	0.982031	-4.56977
Gm11974	5.03251	-1.90711	2.73715	0.0153764	0.982031	-4.55935
Dsel	-5.04956	1.05025	-2.73587	0.0154157	0.982031	-4.57024
Tbkbp1	1.87728	4.93644	2.73549	0.0154273	0.982031	-4.51623
Klhl3	2.67423	-2.98381	2.72993	0.0156002	0.982031	-4.53347
Zbtbd6	1.68494	-3.93712	2.72395	0.0157882	0.982031	-4.48432
Pak2	-1.0088	7.21544	-2.71849	0.0159618	0.982031	-4.34157
Tbc1d20	-3.99903	3.45171	-2.71687	0.0160136	0.982031	-4.55361
Top1	1.00109	6.42613	2.71463	0.0160856	0.982031	-4.42952
Map3k14	3.72402	3.32448	2.71287	0.0161422	0.982031	-4.5555
Tor1b	1.27474	6.2068	2.70922	0.0162606	0.982031	-4.44797
Enpp2	4.51216	-2.54062	2.70874	0.0162761	0.982031	-4.54734
Slc17a5	3.24416	3.28517	2.69532	0.0167187	0.982031	-4.55644
Rnf135	2.62737	4.98288	2.69261	0.0168095	0.982031	-4.51655
Pigp	4.17774	1.63586	2.69188	0.0168338	0.982031	-4.56918
Med4	3.69594	1.51291	2.69026	0.0168886	0.982031	-4.56965
Nfatc2ip	5.34507	1.376	2.6886	0.0169446	0.982031	-4.57012
Sumo2	1.74904	5.18025	2.68825	0.0169566	0.982031	-4.50885
Jak2	2.28333	5.89567	2.68372	0.0171107	0.982031	-4.47182
Sclt1	4.61873	1.86682	2.67953	0.0172544	0.982031	-4.5684
Zfp953	3.72098	3.74059	2.67353	0.0174623	0.982031	-4.55015
Fam57a	3.42821	-3.03504	2.67309	0.0174775	0.982031	-4.53382
Pak3	2.23265	-3.68654	2.67248	0.0174989	0.982031	-4.50327
Plin3	-5.20731	-1.65691	-2.67217	0.0175096	0.982031	-4.56415
Thbs3	3.86132	-3.62389	2.67091	0.0175536	0.982031	-4.5071
Pygl	-5.18325	0.666606	-2.66929	0.0176107	0.982031	-4.57185
Bloc1s5	4.67543	-0.765861	2.66393	0.0177996	0.982031	-4.571
Polr2h	5.55842	0.43052	2.6611	0.0179006	0.982031	-4.57217
Zfp781	1.34953	5.01301	2.6577	0.0180224	0.982031	-4.51714
Sash1	-4.06204	-2.69255	-2.65753	0.0180283	0.982031	-4.54497
Trappc1	-3.84034	3.69428	-2.64918	0.0183307	0.982031	-4.55163
Gtf2h4	5.19601	-0.0361254	2.64725	0.0184016	0.982031	-4.57236
Zc3h12a	-5.15054	-0.166861	-2.64698	0.0184111	0.982031	-4.57228
Tmem29	5.84267	-1.73631	2.64274	0.0185673	0.982031	-4.56378
Cyb5r2	3.76133	-3.48634	2.63741	0.0187656	0.982031	-4.51633
A230072C01Rik	5.16893	-0.853942	2.63664	0.0187941	0.982031	-4.57109
Uqcr11	4.60789	2.24813	2.63388	0.0188979	0.982031	-4.56718
Nudt21	5.05664	-0.485777	2.63351	0.0189118	0.982031	-4.57208
Rnf19b	2.10169	4.47153	2.63318	0.0189242	0.982031	-4.53557
Hdac6	-5.03548	0.0603387	-2.63166	0.0189815	0.982031	-4.57263
Pcdhgb8	4.51091	1.48512	2.62843	0.0191038	0.982031	-4.57072
Sdc4	4.84259	1.6605	2.62166	0.0193627	0.982031	-4.57022
Stk38l	5.11463	0.194455	2.61976	0.019436	0.982031	-4.57283
Ccdc150	2.15535	-3.70283	2.61822	0.0194956	0.982031	-4.50546
Ankrd13a	-1.65878	6.08106	-2.61742	0.0195264	0.982031	-4.46516
Gm17066	-0.935984	6.80503	-2.61687	0.0195478	0.982031	-4.405
1500017E21Rik	3.80074	-2.89774	2.61657	0.0195595	0.982031	-4.54046
Ache	5.2629	1.36168	2.61045	0.0197988	0.982031	-4.57138
Med8	-3.35949	2.54324	-2.60749	0.0199154	0.982031	-4.5657
4933417D19Rik	3.70518	-2.90627	2.60735	0.0199212	0.982031	-4.54053
Rpl15	-0.817886	7.37509	-2.60389	0.0200584	0.982031	-4.33828
Ntsr2	2.96335	-3.44589	2.60074	0.0201842	0.982031	-4.52016
Fam149a	-4.34433	0.402706	-2.59961	0.0202296	0.982031	-4.57308
Macf1	0.290666	12.0074	2.59844	0.0202767	0.982031	-3.32429
Gm10731	2.46822	-3.62782	2.59378	0.020465	0.982031	-4.51121
A930041C12Rik	1.26762	-3.87451	2.58657	0.0207597	0.982031	-4.49688
Ccdc166	-3.84512	-3.04389	-2.58571	0.0207952	0.982031	-4.53693
Rnf114	-2.16364	6.96272	-2.58417	0.0208586	0.982031	-4.39274
Mageh1	3.41874	-3.54482	2.5832	0.0208989	0.982031	-4.5162
Mrgpre	5.04053	-1.4236	2.57937	0.0210579	0.982031	-4.5683
Ttbk2	-3.11487	5.1712	-2.57852	0.0210935	0.982031	-4.51517
Zfp644	0.998496	6.57848	2.57836	0.0211	0.982031	-4.43094
Nadsyn1	5.49019	0.421435	2.57404	0.0212816	0.982031	-4.57344
Stambpl1	-2.19113	4.74515	-2.57373	0.0212946	0.982031	-4.53019
Parp11	3.60623	2.05389	2.57224	0.0213577	0.982031	-4.56934
Hist2h3b	4.65535	-3.14106	2.56834	0.0215229	0.982031	-4.53425
C87436	3.78178	2.76235	2.56759	0.0215551	0.982031	-4.56478
Gnb5	5.12804	-2.07685	2.56535	0.0216508	0.982031	-4.56052
Gapdh	-0.869052	9.50078	-2.56229	0.0217826	0.982031	-3.7767
Aprt	4.22951	0.718483	2.56124	0.0218277	0.982031	-4.57339
Apoa2	1.56108	-3.92412	2.56054	0.021858	0.982031	-4.49614
Pdcd6ip	1.41425	7.28418	2.55635	0.02204	0.982031	-4.35873
Rad52	5.17533	1.17749	2.55396	0.0221444	0.982031	-4.57273
Fastkd1	3.95685	2.91293	2.55062	0.0222912	0.982031	-4.56382
Mtss1l	3.20307	-3.17424	2.54128	0.0227063	0.982031	-4.53419
Ilkap	-2.83888	4.70244	-2.5394	0.0227906	0.982031	-4.53297
Prdm10	4.18121	0.0743869	2.53787	0.0228594	0.982031	-4.57401
Fam132b	-3.48096	-2.54798	-2.53767	0.0228687	0.982031	-4.55224
Ccdc23	4.43627	-1.23743	2.53349	0.0230581	0.982031	-4.5706
Gm5595	3.10438	1.08149	2.53314	0.0230739	0.982031	-4.57325
Iqcd	1.7248	-3.85301	2.53067	0.0231868	0.982031	-4.50164
Wdr18	-4.48246	0.975529	-2.52999	0.0232179	0.982031	-4.57349
Casp4	3.83384	2.82136	2.5279	0.0233141	0.982031	-4.56512
Fam46c	-2.60913	4.35438	-2.5265	0.0233787	0.982031	-4.54254
Zmym1	2.609	4.64112	2.52447	0.0234722	0.982031	-4.53535
Diras2	4.90434	-2.80551	2.52352	0.0235162	0.982031	-4.54638
Col4a3bp	1.67433	4.98258	2.51866	0.0237429	0.982031	-4.52516
Pvt1	4.47857	2.52456	2.51674	0.0238328	0.982031	-4.5676
Iqch	3.78945	-2.77857	2.51413	0.0239556	0.982031	-4.54742
5830416I19Rik	1.82407	-3.96803	2.51346	0.0239872	0.982031	-4.49728
H1f0	-1.91237	4.87359	-2.50821	0.0242367	0.982031	-4.52921
Rcn2	-3.51535	4.41228	-2.50612	0.0243368	0.982031	-4.54195
Otud3	4.44897	-2.47417	2.50417	0.0244301	0.982031	-4.55482
Degs1	-2.66657	4.69255	-2.50406	0.0244354	0.982031	-4.53478
Tub	-1.97735	-2.00672	-2.50119	0.024574	0.982031	-4.56309
Clip2	2.4885	4.80438	2.50117	0.0245749	0.982031	-4.53166
BC051537	3.57738	-3.48493	2.49944	0.024659	0.982031	-4.5235
Zbed5	-3.15475	-0.82247	-2.49889	0.0246853	0.982031	-4.57336
Pibf1	-3.01508	4.21273	-2.49171	0.0250365	0.982031	-4.5469
Fdx1	4.39117	-0.164205	2.48916	0.0251627	0.982031	-4.57461
Asxl2	-1.28159	7.02413	-2.48764	0.0252379	0.982031	-4.39987
Myo18a	-2.18166	5.39411	-2.48703	0.0252682	0.982031	-4.51143
Zfp746	4.45454	1.96128	2.4858	0.0253294	0.982031	-4.57128
Naf1	4.81791	-0.718674	2.48524	0.025357	0.982031	-4.57388
Map3k1	-1.17559	6.67729	-2.48335	0.0254515	0.982031	-4.43347
Phyh	4.4313	2.51644	2.48233	0.0255027	0.982031	-4.56832
Paics	1.73709	5.329	2.48225	0.0255068	0.982031	-4.51437
AI987944	3.48905	2.41132	2.47881	0.0256797	0.982031	-4.56907
Tlr1	-1.92405	6.36992	-2.47596	0.0258238	0.982031	-4.45838
Amz2	-3.89527	3.43809	-2.47587	0.0258284	0.982031	-4.55996
Dido1	0.972093	7.851	2.47561	0.0258414	0.982031	-4.28991
Ets1	2.32873	5.58179	2.47472	0.0258868	0.982031	-4.504
Uevld	4.89508	2.01419	2.4704	0.0261072	0.982031	-4.57131
Naga	-3.83593	5.63813	-2.46598	0.0263344	0.982031	-4.50198
Gpkow	3.55073	4.01528	2.46503	0.0263837	0.982031	-4.55161
Lpcat1	3.3719	3.83067	2.46496	0.0263872	0.982031	-4.55473
4833418N02Rik	3.20399	-2.28071	2.46478	0.0263966	0.982031	-4.5596
Med29	-4.66124	1.78737	-2.46436	0.0264182	0.982031	-4.57235
Kcnc2	3.41383	-3.20904	2.46156	0.0265637	0.982031	-4.53638
Nxpe3	3.97465	-2.42649	2.4586	0.0267184	0.982031	-4.55708
Lrp11	3.9643	-2.3835	2.45812	0.0267435	0.982031	-4.55792
Tango6	-4.9679	-0.38012	-2.45746	0.0267782	0.982031	-4.57487
4933408B17Rik	-2.15517	-3.39229	-2.45683	0.0268114	0.982031	-4.52965
Smarcd3	2.96268	-2.88758	2.45305	0.0270108	0.982031	-4.54666
Trappc5	5.49104	1.52895	2.45201	0.0270658	0.982031	-4.57341
Mrpl52	-1.31372	5.29972	-2.45164	0.0270857	0.982031	-4.51733
1810030O07Rik	2.901	4.85227	2.45154	0.0270907	0.982031	-4.53253
Lamp2	-0.504402	9.47683	-2.45071	0.027135	0.982031	-3.8564
1700008J07Rik	3.83337	0.501632	2.44827	0.0272651	0.982031	-4.57526
Pik3ca	1.27562	6.18602	2.44756	0.027303	0.982031	-4.47348
Cisd1	5.07562	0.392526	2.44359	0.027516	0.982031	-4.57538
Cdo1	-3.8365	-3.07556	-2.44334	0.0275296	0.982031	-4.54157
Apopt1	3.5848	2.61311	2.44197	0.0276034	0.982031	-4.56847
Suco	-1.5522	6.82805	-2.44029	0.0276945	0.982031	-4.42556
D2Wsu81e	4.13777	0.991876	2.43998	0.0277111	0.982031	-4.57484
Uvrag	-2.15929	5.47779	-2.43986	0.0277178	0.982031	-4.51087
Tmem141	4.34258	1.45005	2.43845	0.027794	0.982031	-4.57386
Cradd	-3.59843	0.335993	-2.43652	0.0278994	0.982031	-4.57551
Daglb	1.21767	7.6384	2.43632	0.0279105	0.982031	-4.3322
Pnldc1	2.30618	-3.51488	2.43603	0.0279264	0.982031	-4.52547
Zdhhc8	-2.14818	4.39758	-2.43499	0.0279828	0.982031	-4.545
Rilpl2	3.92886	-2.10984	2.43261	0.0281134	0.982031	-4.56318
4930525G20Rik	-4.43394	-0.552852	-2.43256	0.0281161	0.982031	-4.575
Lect1	2.94771	-3.47562	2.43221	0.0281354	0.982031	-4.52739
Zfp606	-3.39984	4.20704	-2.42975	0.028271	0.982031	-4.54919
C3ar1	-0.714725	9.04128	-2.42587	0.0284866	0.982031	-4.02173
Card11	3.71625	-1.19072	2.42446	0.0285652	0.982031	-4.57277
Timp2	0.762878	8.69815	2.4227	0.0286637	0.982031	-4.12268
Pnpt1	-3.3737	3.3567	-2.42064	0.028779	0.982031	-4.56232
Csf2rb	-1.31499	7.39356	-2.41958	0.0288386	0.982031	-4.36847
Cbr1	4.48828	2.59804	2.4175	0.0289558	0.982031	-4.56907
Terf2ip	4.69056	3.29615	2.41436	0.0291339	0.982031	-4.56315
Ifi27	-2.70806	5.76089	-2.41426	0.02914	0.982031	-4.49981
Hdgf	3.30793	3.80595	2.41304	0.0292091	0.982031	-4.55666
Ercc6	3.16702	4.02459	2.41264	0.0292321	0.982031	-4.55314
Grn	-0.591225	10.3374	-2.41205	0.029266	0.982031	-3.55192
Actg1	-1.05709	7.59128	-2.40968	0.0294018	0.982031	-4.34433
Mok	1.09023	-4.04386	2.40938	0.0294188	0.982031	-4.50133
Thoc6	-3.97077	-1.18013	-2.40703	0.0295541	0.982031	-4.57313
Eef2	-0.67252	8.51653	-2.40677	0.0295686	0.982031	-4.17421
F730043M19Rik	3.21134	-3.43373	2.40605	0.0296106	0.982031	-4.53048
Haus6	3.94346	1.41179	2.4	0.0299618	0.982031	-4.57458
Cops3	-2.27877	4.44499	-2.39827	0.0300632	0.982031	-4.54536
Dhrs11	4.27889	-2.10796	2.39814	0.0300705	0.982031	-4.56405
Syde1	1.98684	-3.78645	2.39613	0.0301885	0.982031	-4.51427
Ift81	4.02482	-1.11412	2.39399	0.0303147	0.982031	-4.57374
Pacsin3	1.46102	-3.89365	2.39339	0.0303504	0.982031	-4.50899
Ppp1r12c	1.41671	5.54544	2.39149	0.0304627	0.982031	-4.51116
Fhit	-4.41141	-1.20536	-2.39098	0.0304931	0.982031	-4.57326
Brca2	3.51138	2.59975	2.3902	0.0305395	0.982031	-4.5696
Tmem88	2.82519	-1.92658	2.38752	0.0306989	0.982031	-4.56675
LOC100861615	2.16577	-2.72707	2.38678	0.0307432	0.982031	-4.55296
Btf3	-2.41892	5.32915	-2.38462	0.0308729	0.982031	-4.52017
Chchd1	5.34161	0.140883	2.38292	0.0309755	0.982031	-4.57632
Pafah2	-3.10428	-2.8664	-2.38242	0.0310053	0.982031	-4.54976
Ntsr1	4.23713	-3.36726	2.38208	0.0310259	0.982031	-4.53427
Vcpkmt	2.76672	-2.51806	2.38074	0.0311068	0.982031	-4.55756
Hdhd2	-4.56833	1.34091	-2.37929	0.0311947	0.982031	-4.57508
Jam3	4.48195	1.38194	2.37617	0.0313846	0.982031	-4.57503
Gba	-1.47197	6.94717	-2.37526	0.0314401	0.982031	-4.42345
Capn7	1.40032	6.21225	2.37231	0.0316211	0.982031	-4.47888
Sorbs2	3.32492	-2.99405	2.37171	0.0316578	0.982031	-4.54679
Mdga1	-4.21549	-2.42049	-2.37128	0.0316844	0.982031	-4.55966
Hist1h4h	-4.14336	-2.74341	-2.36737	0.0319261	0.982031	-4.55323
Mafg	2.05227	4.67706	2.36422	0.0321219	0.982031	-4.54126
Lyar	4.2939	2.0801	2.36291	0.0322037	0.982031	-4.57292
Chd1	1.514	6.54084	2.3621	0.0322547	0.982031	-4.45826
Gnpda1	1.90392	5.24975	2.36182	0.0322718	0.982031	-4.52436
Clcf1	3.70905	-0.616571	2.3618	0.032273	0.982031	-4.57598
Ctsh	-0.865663	8.47235	-2.35743	0.0325483	0.982031	-4.20126
Mroh1	-1.52545	5.4768	-2.35444	0.0327372	0.982031	-4.51639
Dusp3	1.96427	4.97151	2.3532	0.0328165	0.982031	-4.53376
Fads3	-4.56664	-0.167629	-2.35311	0.0328219	0.982031	-4.57663
Lrrc75a	4.4495	0.249177	2.35282	0.0328406	0.982031	-4.57676
Gm2027	0.944245	-4.10706	2.35268	0.0328496	0.982031	-4.50293
Stim2	3.7982	2.60637	2.34877	0.0330992	0.982031	-4.57039
Echdc1	-5.28154	0.328129	-2.34729	0.0331942	0.982031	-4.57683
Setd2	0.840457	8.20203	2.34709	0.0332072	0.982031	-4.25991
Rnps1	2.20063	4.54725	2.34409	0.033401	0.982031	-4.54521
Polr3k	4.21785	2.70739	2.3438	0.03342	0.982031	-4.56983
Gprasp1	1.2651	6.82068	2.343	0.0334716	0.982031	-4.43888
Notch1	-1.44178	6.90414	-2.34166	0.0335588	0.982031	-4.43195
Tmem229a	-3.57493	-2.78306	-2.34087	0.0336101	0.982031	-4.55323
Stx17	-3.80287	3.39608	-2.33967	0.0336882	0.982031	-4.56394
Rbmx2	-4.3425	0.989809	-2.33903	0.0337302	0.982031	-4.57638
Usf1	2.46463	3.32769	2.33797	0.033799	0.982031	-4.56471
Wac	1.16972	7.38396	2.33626	0.0339114	0.982031	-4.38451
Cep85	3.46957	0.817251	2.33532	0.0339731	0.982031	-4.57667
Cntn2	-2.82008	-2.7286	-2.33119	0.0342458	0.982031	-4.55477
Depdc7	-3.80234	0.86537	-2.3303	0.0343048	0.982031	-4.57669
Mtg1	-4.31629	-0.523453	-2.32819	0.034445	0.982031	-4.57664
Ushbp1	2.19134	-3.61477	2.32552	0.0346233	0.982031	-4.52707
Rasgrf2	4.34386	0.401421	2.32435	0.0347018	0.982031	-4.57715
Ctc1	-1.18758	6.63918	-2.32231	0.0348391	0.982031	-4.45567
Slc4a4	2.79072	-3.37586	2.32188	0.0348682	0.982031	-4.53687
Gripap1	3.72417	2.721	2.32146	0.0348961	0.982031	-4.5702
Rab6a	1.66807	5.09136	2.32012	0.0349865	0.982031	-4.53185
Gli3	2.64763	-3.65071	2.31942	0.0350337	0.982031	-4.52579
Bub3	3.78755	4.01792	2.3178	0.0351436	0.982031	-4.55632
Mpzl1	2.51912	-3.60462	2.31445	0.0353718	0.982031	-4.52814
Pex7	-2.89881	3.43833	-2.31408	0.0353975	0.982031	-4.56414
Cdc25b	3.02645	-3.31687	2.31272	0.0354902	0.982031	-4.53938
Gm12185	4.43145	0.774194	2.31116	0.0355971	0.982031	-4.57708
Rnft1	2.09069	3.78964	2.30887	0.0357553	0.982031	-4.55998
Mapre3	-5.43244	-0.631727	-2.30882	0.0357587	0.982031	-4.57677
Exosc6	4.21165	0.674721	2.30502	0.0360214	0.982031	-4.57727
Zxda	-3.03639	2.47771	-2.30284	0.0361733	0.982031	-4.57206
Phf11b	-3.80223	0.220909	-2.29973	0.0363912	0.982031	-4.57755
Zfp36	0.973111	8.0402	2.29821	0.0364977	0.982031	-4.30182
Slc2a8	-4.72325	2.62168	-2.29603	0.0366514	0.982031	-4.57136
Prpsap2	-1.02672	5.99844	-2.29483	0.0367362	0.982031	-4.49753
Ly6a	-5.22309	0.899941	-2.29331	0.0368442	0.982031	-4.57721
Bbc3	3.81973	-2.19135	2.29226	0.0369186	0.982031	-4.56547
Polr3g	4.71886	-1.32768	2.29009	0.037073	0.982031	-4.57424
Ube2ql1	1.9327	-3.8056	2.28913	0.0371415	0.982031	-4.52012
Ptpn1	-0.992715	7.50703	-2.28892	0.0371572	0.982031	-4.37883
Gsto2	3.0238	-3.19724	2.28644	0.0373343	0.982031	-4.54442
Arpc4	-0.520064	7.7093	-2.28633	0.0373424	0.982031	-4.35382
Pcgf6	3.21489	2.87241	2.2836	0.0375396	0.982031	-4.56994
Fcgr1	-0.81685	7.13172	-2.28283	0.0375946	0.982031	-4.41979
Cox16	-2.179	4.08698	-2.28269	0.037605	0.982031	-4.55637
Slc38a2	1.68541	6.39858	2.28199	0.0376556	0.982031	-4.4764
Hnrnpab	-1.59285	6.43286	-2.2819	0.0376623	0.982031	-4.47427
Gpr56	-0.794037	9.30058	-2.28154	0.0376884	0.982031	-4.01614
B3glct	-3.23417	3.59211	-2.2747	0.0381871	0.982031	-4.56345
Ppp1cb	1.4366	6.29625	2.27407	0.0382335	0.982031	-4.48335
Zfp932	3.32401	1.68672	2.27366	0.0382634	0.982031	-4.57588
Ecsit	-3.45659	1.66042	-2.27075	0.0384785	0.982031	-4.576
Tsc22d3	-2.1481	6.27802	-2.26556	0.0388638	0.982031	-4.48523
Phax	-3.34329	3.52509	-2.26549	0.038869	0.982031	-4.56447
A730020M07Rik	-3.29826	-3.2477	-2.26212	0.0391213	0.982031	-4.54396
Vwa9	-2.44925	5.16577	-2.26191	0.0391368	0.982031	-4.53271
Gnaq	1.33322	7.35669	2.26025	0.0392618	0.982031	-4.40097
Nicn1	4.5586	-0.594188	2.25991	0.0392876	0.982031	-4.57758
Rbm33	-1.26717	7.28041	-2.25861	0.0393857	0.982031	-4.40915
Dcdc2c	-1.93	-1.29731	-2.25842	0.0393996	0.982031	-4.575
S100a10	3.35501	-3.06846	2.25664	0.0395345	0.982031	-4.54933
Slc46a3	2.22959	5.4902	2.25615	0.0395716	0.982031	-4.52221
Cpsf7	2.46662	5.54119	2.25521	0.0396432	0.982031	-4.52039
Sec24b	-1.10198	7.32402	-2.25437	0.0397074	0.982031	-4.40541
Mecr	4.33148	-0.96674	2.25294	0.0398158	0.982031	-4.57676
Pvrl2	-4.46885	1.87	-2.2521	0.0398802	0.982031	-4.57566
Ssfa2	-1.52038	6.74039	-2.25164	0.0399151	0.982031	-4.45681
Smpd3	2.37861	-3.10074	2.24889	0.040126	0.982031	-4.54878
Camta2	-1.1366	7.46177	-2.24745	0.040237	0.982031	-4.39187
Ost4	2.03387	5.32235	2.24602	0.0403479	0.982031	-4.52866
Ptgr2	-3.18674	4.82516	-2.2456	0.0403801	0.982031	-4.54292
Pigm	-1.15836	6.40916	-2.24529	0.0404037	0.982031	-4.47958
Il6ra	0.581961	9.03671	2.24371	0.0405268	0.982031	-4.10988
Iqgap3	4.71545	0.909666	2.24208	0.0406532	0.982031	-4.57798
Gm7102	1.24573	-3.93095	2.24035	0.0407882	0.982031	-4.51797
R3hdm4	2.52685	5.16555	2.23973	0.0408367	0.982031	-4.53394
Amer1	4.29789	2.89572	2.23965	0.0408428	0.982031	-4.57073
Mllt4	3.72255	0.442358	2.23897	0.0408961	0.982031	-4.57841
Ksr1	-3.05266	-0.164905	-2.23631	0.0411042	0.982031	-4.57838
Zfp784	5.28604	2.27165	2.23426	0.0412662	0.982031	-4.57441
Igfbp4	3.77931	1.29323	2.2339	0.0412943	0.982031	-4.57748
Ftx	2.60798	3.58614	2.23324	0.0413468	0.982031	-4.56466
Aacs	3.2558	-2.49259	2.23273	0.0413871	0.982031	-4.56241
Vps33a	-2.13882	5.29695	-2.23162	0.0414744	0.982031	-4.53033
Gcc1	-4.16144	3.42264	-2.23067	0.0415501	0.982031	-4.56646
Mamld1	3.31033	2.02281	2.22901	0.0416825	0.982031	-4.57553
Ptprj	-0.836834	8.78543	-2.22819	0.0417473	0.982031	-4.1784
Ighmbp2	3.41014	-0.45495	2.22758	0.041796	0.982031	-4.57826
Olfr99	3.36425	-2.5577	2.22721	0.0418257	0.982031	-4.56145
Atp5l	-1.46592	4.95549	-2.22593	0.0419279	0.982031	-4.54055
Chchd7	-4.66921	0.963091	-2.22517	0.0419891	0.982031	-4.57817
Pcdhga3	4.74855	0.984981	2.22356	0.0421184	0.982031	-4.57816
Mrpl42	3.76776	2.41653	2.22295	0.0421673	0.982031	-4.57393
Smagp	-3.61448	1.80062	-2.22272	0.0421862	0.982031	-4.57639
Sf3b3	-2.04023	4.82133	-2.22148	0.0422858	0.982031	-4.54413
Dnajc6	3.07723	-3.32796	2.22136	0.0422955	0.982031	-4.54332
S1pr5	0.608784	-4.019	2.22124	0.0423056	0.982031	-4.516
Rnf180	-1.80994	5.51351	-2.22096	0.0423283	0.982031	-4.52366
Acvr1b	-4.36679	3.0013	-2.21855	0.0425229	0.982031	-4.57043
Kitl	-2.59676	3.80617	-2.21821	0.0425505	0.982031	-4.56246
Patl1	-1.43011	5.93586	-2.21668	0.0426752	0.982031	-4.50697
Ctse	3.45085	-3.63623	2.21655	0.042686	0.982031	-4.53238
Catsper2	-3.22334	-2.61158	-2.21567	0.0427573	0.982031	-4.56084
Ypel5	-1.97225	5.82751	-2.21524	0.0427923	0.982031	-4.51182
Lipo1	2.9157	3.19697	2.21517	0.042798	0.982031	-4.56894
Tmem60	-2.2522	3.69825	-2.21369	0.0429192	0.982031	-4.56392
Zcchc9	1.84233	4.5621	2.20906	0.0433002	0.982031	-4.55043
Psmc2	1.47054	5.64446	2.20826	0.0433656	0.982031	-4.51969
Bcl2l13	-2.73512	3.58633	-2.20738	0.0434389	0.982031	-4.56537
Tfdp2	3.72276	2.64467	2.20478	0.0436544	0.982031	-4.57307
Camkv	-1.85401	-3.65503	-2.20434	0.0436914	0.982031	-4.53231
Fap	1.14994	-3.80195	2.20368	0.0437458	0.982031	-4.52582
Prcc	3.67301	1.49849	2.20338	0.0437712	0.982031	-4.57753
Capn10	-4.10047	-1.16831	-2.20193	0.0438919	0.982031	-4.57669
4931406H21Rik	4.77382	0.634946	2.20084	0.0439835	0.982031	-4.57887
A830052D11Rik	4.37171	-1.724	2.20068	0.0439964	0.982031	-4.57294
Cnot2	1.33316	6.99791	2.19926	0.0441157	0.982031	-4.44397
Med1	1.28494	7.46986	2.19728	0.0442822	0.982031	-4.40034
Prkra	3.14016	2.18981	2.19465	0.0445044	0.982031	-4.57549
Arfgef2	2.52673	4.83001	2.19424	0.0445395	0.982031	-4.5452
Dus2	-4.34368	0.559615	-2.19355	0.044598	0.982031	-4.57903
Zfp326	1.47246	4.6602	2.19251	0.0446862	0.982031	-4.54909
Gas2	3.06475	-3.24498	2.19224	0.0447089	0.982031	-4.54718
Epha4	-3.85511	-3.01939	-2.19093	0.0448206	0.982031	-4.55319
Tm6sf1	-0.810633	6.81338	-2.19045	0.0448619	0.982031	-4.45928
Plaa	-1.87064	5.62036	-2.18966	0.0449289	0.982031	-4.52189
Sar1a	1.89608	6.23562	2.18699	0.0451577	0.982031	-4.4951
Tcf25	-0.732389	7.23732	-2.18648	0.0452018	0.982031	-4.42527
Btbd18	2.49079	-3.21374	2.18606	0.0452375	0.982031	-4.54835
1110012L19Rik	4.24448	-0.597854	2.18593	0.0452483	0.982031	-4.57871
Thoc1	1.90571	4.69838	2.18441	0.04538	0.982031	-4.54862
Vcan	2.94601	-2.08716	2.18427	0.0453913	0.982031	-4.5695
Pef1	3.01784	3.22249	2.18295	0.0455054	0.982031	-4.5695
Als2	4.56312	0.284558	2.18228	0.0455636	0.982031	-4.57929
Ece2	4.10369	-1.91207	2.18122	0.0456555	0.982031	-4.57152
Fem1c	-2.61726	3.86118	-2.18073	0.0456981	0.982031	-4.56288
Usp16	-1.50885	5.51292	-2.18005	0.0457567	0.982031	-4.52636
Ampd2	-4.514	1.24475	-2.17937	0.0458161	0.982031	-4.57844
Abca6	1.27099	-3.79984	2.17933	0.0458192	0.982031	-4.52749
Gm14431	2.14984	2.98062	2.17806	0.0459304	0.982031	-4.57149
Gm8898	2.14984	2.98062	2.17806	0.0459304	0.982031	-4.57149
Aldoa	1.09613	7.53588	2.17668	0.0460507	0.982031	-4.39716
Sat1	0.521241	8.48174	2.17626	0.0460876	0.982031	-4.26062
St3gal2	2.00448	5.27629	2.17489	0.0462077	0.982031	-4.53429
Mier3	1.73275	4.20302	2.17473	0.0462209	0.982031	-4.55821
Poldip3	1.80196	5.96052	2.17455	0.0462375	0.982031	-4.50932
Asrgl1	-3.03857	-2.25852	-2.17376	0.0463065	0.982031	-4.56758
Aggf1	-1.28962	4.8399	-2.17333	0.0463441	0.982031	-4.54594
Zfp292	0.629199	8.85841	2.17249	0.0464183	0.982031	-4.18501
Ubqln2	-1.98043	3.84518	-2.17126	0.0465267	0.982031	-4.56337
Cox20	3.3276	0.869478	2.17086	0.0465615	0.982031	-4.57911
Cd99l2	4.41834	1.58475	2.17057	0.0465872	0.982031	-4.57786
Gm5547	2.99928	-3.40931	2.16931	0.046699	0.982031	-4.54324
Acn9	2.94798	-2.95334	2.16521	0.0470633	0.982031	-4.55571
Gbp5	3.62624	1.12429	2.16398	0.0471734	0.982031	-4.57888
Wdfy1	-1.5117	5.487	-2.16174	0.0473734	0.982031	-4.52843
Cct4	2.08468	5.99622	2.16149	0.0473964	0.982031	-4.50883
Chn2	-1.18022	6.89197	-2.16138	0.0474061	0.982031	-4.45742
Macrod2	3.69633	-3.51482	2.1598	0.0475478	0.982031	-4.54016
Kif1a	5.14674	0.3412	2.15602	0.0478895	0.982031	-4.57968
Vtn	1.45153	-3.91783	2.15374	0.0480966	0.982031	-4.52446
2410021H03Rik	2.90174	-3.241	2.15331	0.0481354	0.982031	-4.54904
Bcl2l11	2.02393	6.00814	2.15299	0.0481653	0.982031	-4.50902
Pak1ip1	2.60219	2.45581	2.15171	0.0482819	0.982031	-4.57512
Zfp109	4.06217	-0.338185	2.15057	0.0483861	0.982031	-4.57954
Pycrl	4.81821	0.209045	2.14989	0.0484481	0.982031	-4.57978
Zfp759	-3.45028	1.65295	-2.14924	0.0485079	0.982031	-4.57804
Glod4	-2.55982	4.74607	-2.14873	0.0485542	0.982031	-4.54917
S100a8	4.06568	-2.75922	2.14617	0.0487904	0.982031	-4.56038
Tnfsf13	-4.65494	-0.0730247	-2.14552	0.0488503	0.982031	-4.57979
Nfkbiz	2.60669	3.54531	2.14539	0.0488619	0.982031	-4.56748
Impa1	3.75291	2.5628	2.14399	0.0489915	0.982031	-4.57474
Arfip1	-1.88895	4.86668	-2.14196	0.0491798	0.982031	-4.5468
Etfa	-2.60093	3.4968	-2.14103	0.0492657	0.982031	-4.56808
Hist1h2bn	2.82662	-3.46673	2.14095	0.0492736	0.982031	-4.54279
Pkia	2.16928	-3.34136	2.13774	0.0495733	0.982031	-4.54688
Pcolce	-3.04604	-2.52681	-2.13645	0.0496942	0.982031	-4.56471
Zkscan7	4.26237	-1.57591	2.13532	0.0498004	0.982031	-4.57543
Plekhj1	-3.26673	2.41983	-2.13356	0.0499654	0.982031	-4.57564
Hmgn2	-2.89819	3.67955	-2.13212	0.0501012	0.982031	-4.56645
3110056K07Rik	3.20932	3.02969	2.12974	0.0503272	0.982031	-4.57223
Psme1	-1.45754	7.3511	-2.12858	0.0504374	0.982031	-4.42455
Podnl1	1.85822	-3.7139	2.12799	0.0504929	0.982031	-4.53443
Tnks	-1.55043	5.39144	-2.12762	0.0505288	0.982031	-4.53363
Rab34	4.12243	0.597985	2.1276	0.0505304	0.982031	-4.57999
Psmb4	-1.4108	5.11538	-2.12664	0.0506222	0.982031	-4.54148
Gm4841	3.23601	-2.87323	2.12647	0.0506383	0.982031	-4.55884
Nr1d2	-1.64463	4.86574	-2.12579	0.0507027	0.982031	-4.54759
Kif24	-2.19308	-2.38051	-2.12562	0.0507195	0.982031	-4.5672
Skp2	-4.43924	1.69391	-2.12459	0.0508177	0.982031	-4.57834
Commd5	-3.49934	2.8333	-2.12457	0.0508194	0.982031	-4.57363
Mblac1	4.0374	0.0746327	2.12247	0.0510216	0.982031	-4.58018
Prr5l	-4.15741	0.456795	-2.12188	0.0510778	0.982031	-4.58015
Tas2r135	1.57843	-3.98474	2.12046	0.0512151	0.982031	-4.52448
Fam193a	1.51138	7.04039	2.11647	0.051601	0.982031	-4.45264
Ptgfrn	-2.72842	3.18767	-2.11559	0.0516863	0.982031	-4.57139
I730030J21Rik	-2.71698	-3.33071	-2.11438	0.0518037	0.982031	-4.5483
Tdrd3	-3.1534	3.31815	-2.11393	0.051848	0.982031	-4.57038
Slc22a5	-4.37617	2.10513	-2.11342	0.0518978	0.982031	-4.57728
Vegfa	4.01794	-1.80011	2.11335	0.0519051	0.982031	-4.57407
Stk4	-1.04912	6.54178	-2.11284	0.0519549	0.982031	-4.48609
Oxct1	0.505582	6.92529	2.11242	0.0519955	0.982031	-4.46168
Spp1	-2.8602	-3.26541	-2.10972	0.0522604	0.982031	-4.55034
Ccdc124	4.3317	1.81607	2.10828	0.0524022	0.982031	-4.57829
Cd101	4.0608	-0.159464	2.10798	0.0524317	0.982031	-4.58031
Map3k4	-2.97406	5.21714	-2.1074	0.0524885	0.982031	-4.53984
Cyp4f13	-1.8747	5.05944	-2.10631	0.0525959	0.982031	-4.54398
Gm10390	2.9286	-3.21125	2.10512	0.0527139	0.982031	-4.55197
Defb42	1.87019	-3.82978	2.10393	0.0528315	0.982031	-4.53106
Fam20b	3.1737	3.54211	2.103	0.0529239	0.982031	-4.56866
Rnf219	-4.3698	2.36177	-2.10211	0.0530125	0.982031	-4.57649
2810025M15Rik	2.53493	4.07835	2.10151	0.0530728	0.982031	-4.56254
Tmem143	4.70324	-0.662789	2.09933	0.0532901	0.982031	-4.57996
Usp46	3.42707	0.293459	2.09829	0.0533942	0.982031	-4.58054
Asna1	2.50951	4.62187	2.09778	0.0534454	0.982031	-4.5539
Zfp593	4.49887	-2.02478	2.09555	0.0536692	0.982031	-4.57229
Zfr2	3.32805	-2.29166	2.09515	0.0537094	0.982031	-4.56922
Tlr5	2.09305	4.66288	2.09392	0.0538343	0.982031	-4.55328
Gna11	2.32039	3.51136	2.09198	0.0540298	0.982031	-4.56924
Hadh	-3.92691	1.79108	-2.09146	0.0540829	0.982031	-4.57864
Mrm1	-4.20208	-0.818031	-2.09094	0.0541355	0.982031	-4.57979
Rbm25	0.931457	7.70945	2.09068	0.0541618	0.982031	-4.39571
Pnp2	-4.27538	-1.5734	-2.0905	0.0541798	0.982031	-4.57631
Scfd1	-3.69533	3.40912	-2.08994	0.0542375	0.982031	-4.57021
Tmf1	1.57763	5.97051	2.08924	0.0543085	0.982031	-4.51593
Acsl3	4.72263	-0.465061	2.08822	0.0544119	0.982031	-4.58037
Bivm	2.71466	3.1222	2.08636	0.0546018	0.982031	-4.57257
Appl1	-1.77338	5.73146	-2.08547	0.0546935	0.982031	-4.52527
Sgms1	2.16948	4.25097	2.085	0.0547418	0.982031	-4.56065
Zfml	0.735497	7.7852	2.08391	0.0548538	0.982031	-4.38873
Pdcd2l	4.35334	1.99348	2.08387	0.0548578	0.982031	-4.57818
Syvn1	-2.07067	5.30734	-2.08243	0.0550052	0.982031	-4.53879
Hist1h2ad	-3.19033	-2.95408	-2.08042	0.0552125	0.982031	-4.5589
Dnase1l3	2.90862	-3.09958	2.08034	0.0552217	0.982031	-4.55574
Rab4a	3.8162	-2.04035	2.07937	0.0553215	0.982031	-4.57251
Lsm8	-3.69349	2.04077	-2.07774	0.0554903	0.982031	-4.57814
Eif3j2	-4.79031	3.32831	-2.07773	0.0554912	0.982031	-4.5712
Serpinb6a	5.12589	0.0576433	2.0715	0.0561417	0.982031	-4.58093
Gm16523	4.67794	0.459381	2.06992	0.056308	0.982031	-4.58092
Tada3	-2.83054	4.08767	-2.06973	0.0563282	0.982031	-4.56347
Ncapg	-2.38532	-3.14551	-2.06946	0.0563564	0.982031	-4.55513
Fignl1	-3.05879	-3.23347	-2.06808	0.0565023	0.982031	-4.55304
Lbh	-3.79368	2.07855	-2.06562	0.0567618	0.982031	-4.57822
Tmem184c	-2.71684	3.27373	-2.06376	0.0569598	0.982031	-4.57198
Satb1	2.25174	1.07889	2.06204	0.057143	0.982031	-4.58052
Tanc1	-4.22171	-1.29902	-2.06174	0.0571747	0.982031	-4.57846
Syngr1	1.30031	5.91346	2.06101	0.0572526	0.982031	-4.52046
Bcl9l	1.53512	6.94534	2.05814	0.0575596	0.982031	-4.46778
Shcbp1l	3.23731	-2.66756	2.058	0.0575747	0.982031	-4.56489
Strap	1.96595	4.5176	2.05791	0.0575853	0.982031	-4.55742
Hif1an	3.25579	1.61339	2.05746	0.057633	0.982031	-4.57965
Lsr	2.69373	-2.43531	2.05716	0.057665	0.982031	-4.56837
Ndrg2	-4.52869	0.540083	-2.05715	0.0576666	0.982031	-4.58108
Klf13	-1.5519	6.08709	-2.05516	0.0578811	0.982031	-4.51404
Rfc2	3.89987	1.68694	2.05497	0.0579012	0.982031	-4.57952
Ccdc64	3.18895	-3.83463	2.05465	0.0579355	0.982031	-4.53409
Shd	3.0178	-2.96954	2.05406	0.0579993	0.982031	-4.55958
Pias1	-1.52791	6.88965	-2.05384	0.0580239	0.982031	-4.47207
Pcdhga2	4.82234	0.35922	2.05331	0.0580807	0.982031	-4.5812
Fbxo38	2.1479	4.63516	2.05327	0.0580858	0.982031	-4.55554
5830432E09Rik	3.29495	-0.447924	2.05267	0.0581497	0.982031	-4.58092
4931403E22Rik	3.09405	-2.34523	2.05185	0.0582393	0.982031	-4.5697
1700084E18Rik	-2.94484	-3.1078	-2.05097	0.0583352	0.982031	-4.55676
Ltbp3	3.90769	-1.91546	2.05075	0.0583581	0.982031	-4.57438
Chst14	3.33721	2.38542	2.05024	0.0584144	0.982031	-4.57737
Abracl	1.91175	2.2762	2.04993	0.0584479	0.982031	-4.57781
Fndc7	3.05218	-3.85621	2.04888	0.0585622	0.982031	-4.53362
Slc22a17	-2.44212	3.88275	-2.0487	0.0585823	0.982031	-4.56665
Fam213b	3.28175	-0.434024	2.04804	0.0586543	0.982031	-4.58101
Rab33a	2.3541	-3.43048	2.04755	0.0587072	0.982031	-4.54866
Setd5	1.49753	7.64412	2.04727	0.0587378	0.982031	-4.41163
Ebpl	-4.61026	0.720676	-2.04588	0.0588898	0.982031	-4.58113
Kmt2c	-0.567239	9.29585	-2.04562	0.0589186	0.982031	-4.14751
Tlr7	-0.564799	10.0396	-2.04459	0.0590316	0.982031	-3.97555
Scn8a	3.81627	-1.78205	2.04412	0.0590835	0.982031	-4.57569
Slc35f6	2.0995	3.60183	2.044	0.0590966	0.982031	-4.56969
Ufc1	3.44582	3.17757	2.04363	0.0591371	0.982031	-4.57317
Frmpd4	-2.3246	-3.24729	-2.04221	0.0592939	0.982031	-4.55385
9430016H08Rik	3.56626	-1.45192	2.04178	0.0593416	0.982031	-4.57799
Tmem186	-3.1496	2.41232	-2.04169	0.0593515	0.982031	-4.57743
Spryd7	-3.86269	-1.33758	-2.04156	0.059366	0.982031	-4.57862
Mansc1	2.99089	-3.86406	2.04123	0.0594019	0.982031	-4.53389
Malat1	-0.128285	14.6633	-2.04079	0.0594506	0.982031	-9.66715
Dnali1	2.98686	-3.86458	2.04073	0.0594579	0.982031	-4.53391
Ccl25	-2.61514	-3.29067	-2.03944	0.0596002	0.982031	-4.55288
Arrdc4	-4.26881	1.84491	-2.03849	0.0597052	0.982031	-4.57939
Noa1	3.92502	1.07768	2.03604	0.0599778	0.982031	-4.58092
Lsm12	4.39559	0.755688	2.03593	0.0599909	0.982031	-4.58126
1810043H04Rik	4.0117	-0.992934	2.03539	0.0600508	0.982031	-4.5802
Xpo5	-2.40379	3.57742	-2.03459	0.0601403	0.982031	-4.57017
Fbxw10	4.67132	-0.13245	2.03423	0.0601806	0.982031	-4.58142
Cx3cr1	2.76127	10.2329	2.03326	0.060289	0.982031	-3.94515
Trpv4	-3.86541	-1.44265	-2.03315	0.0603014	0.982031	-4.5782
D030028A08Rik	-3.4626	2.58458	-2.03264	0.0603582	0.982031	-4.57684
Xlr4c	2.64912	-2.46868	2.02905	0.0607624	0.982031	-4.56872
5031434O11Rik	3.51828	-2.05381	2.02871	0.0608006	0.982031	-4.57357
Hmbs	-3.24005	-0.318682	-2.02848	0.0608265	0.982031	-4.5814
Tomm22	1.24032	5.70208	2.02794	0.0608874	0.982031	-4.53042
Glrx5	3.73699	-0.960614	2.02652	0.0610486	0.982031	-4.58044
9530077C05Rik	-2.38193	-3.44843	-2.0262	0.0610846	0.982031	-4.54922
Rab10os	4.24756	0.0949836	2.02554	0.0611595	0.982031	-4.58162
Vwa7	4.18646	-1.84989	2.02552	0.0611623	0.982031	-4.57551
Smg9	-3.79878	3.88237	-2.02532	0.0611843	0.982031	-4.56737
Vamp4	-1.11617	5.09325	-2.02402	0.0613318	0.982031	-4.54748
Ccdc137	3.10078	2.9402	2.02309	0.0614381	0.982031	-4.57518
Ids	0.952324	7.97819	2.02208	0.0615533	0.982031	-4.38088
Mettl18	-3.51754	-1.47861	-2.02201	0.0615608	0.982031	-4.57821
Atp5h	2.71969	3.64804	2.02061	0.061721	0.982031	-4.5699
Tsnax	2.01725	4.97789	2.01953	0.0618452	0.982031	-4.55028
Pla2g4a	-2.73721	4.99689	-2.01923	0.0618793	0.982031	-4.54989
B3gnt2	-2.51855	4.261	-2.01919	0.0618844	0.982031	-4.56286
Gdf11	1.96122	-3.40865	2.01726	0.0621057	0.982031	-4.55079
Efcab6	1.99164	-3.64879	2.01694	0.0621428	0.982031	-4.54343
Zfp317	2.44144	3.91112	2.01651	0.0621927	0.982031	-4.56732
Slc16a1	-3.4103	0.576421	-2.01594	0.0622584	0.982031	-4.58167
Slc7a3	2.79086	-3.89001	2.01532	0.06233	0.982031	-4.53483
Arntl	3.81835	-1.24594	2.01406	0.0624747	0.982031	-4.57955
Rnf169	-1.12688	7.9024	-2.01239	0.0626683	0.982031	-4.39193
Cdk1	3.14744	-2.8313	2.01223	0.0626867	0.982031	-4.56369
Ncaph2	2.6541	4.27333	2.01201	0.0627125	0.982031	-4.56294
Ggcx	1.87049	4.00227	2.01191	0.0627242	0.982031	-4.56642
Pln	3.56038	1.18359	2.01116	0.0628117	0.982031	-4.58117
Cdc26	1.21277	4.21267	2.011	0.0628297	0.982031	-4.56381
Mars2	3.32238	-1.69967	2.01073	0.062862	0.982031	-4.577
Ubn2	0.724622	8.76469	2.01025	0.062917	0.982031	-4.27006
Adnp2	2.96144	3.07444	2.01022	0.062921	0.982031	-4.57465
Rpl28	-0.912792	7.15872	-2.01016	0.0629283	0.982031	-4.45985
Clip1	0.904164	7.23744	2.009	0.0630632	0.982031	-4.4542
Nthl1	2.72508	-2.8472	2.00764	0.0632225	0.982031	-4.56358
Gm16973	2.79388	3.14668	2.00652	0.0633531	0.982031	-4.57426
Car2	2.72209	-3.89905	2.00603	0.0634105	0.982031	-4.53518
Fut11	3.48544	3.6377	2.00486	0.0635487	0.982031	-4.57044
Tmem106b	0.843065	6.66812	2.00339	0.0637206	0.982031	-4.49165
Atrip	4.25913	0.210954	2.00186	0.0639019	0.982031	-4.58197
Spata2l	-3.75048	-0.638849	-1.99954	0.0641759	0.982031	-4.58152
Olfr1029	3.10843	-2.54806	1.9992	0.064216	0.982031	-4.56851
Arf2	-1.73105	4.47514	-1.99912	0.0642255	0.982031	-4.56045
Tmem201	4.35961	2.24728	1.99908	0.0642311	0.982031	-4.57885
Pofut1	3.18045	3.79138	1.99903	0.0642366	0.982031	-4.56912
Vimp	1.36158	5.35195	1.99828	0.0643259	0.982031	-4.54258
Cobll1	2.12322	-3.74551	1.99796	0.0643633	0.982031	-4.54114
Cyp2d22	-2.5803	-2.69	-1.99739	0.0644317	0.982031	-4.5665
Fkbp7	3.43022	-0.523592	1.99737	0.0644344	0.982031	-4.58169
Abhd14a	4.36592	-1.06034	1.99592	0.0646069	0.982031	-4.5806
Prim2	4.06458	1.17116	1.99494	0.0647237	0.982031	-4.58144
Fv1	3.34585	-2.22524	1.9949	0.0647283	0.982031	-4.57261
Eif4enif1	-2.51419	5.1538	-1.99487	0.0647321	0.982031	-4.54764
Pf4	-2.6361	-3.01963	-1.99435	0.0647943	0.982031	-4.56088
Suds3	3.30639	2.93176	1.994	0.064836	0.982031	-4.57586
Fancf	4.03326	-0.77854	1.99385	0.0648544	0.982031	-4.58139
1110004E09Rik	-4.24143	-1.30394	-1.99337	0.0649119	0.982031	-4.57964
Pitpnm1	-3.19365	2.60352	-1.99301	0.0649545	0.982031	-4.57755
Slc12a5	3.53002	-1.74815	1.99266	0.0649972	0.982031	-4.57702
Slc22a13b-ps	-1.62208	-3.78587	-1.99109	0.0651857	0.982031	-4.54008
H2-D1	-0.839786	8.06707	-1.98741	0.0656291	0.982031	-4.37916
Golga3	-2.04896	4.21389	-1.98716	0.0656598	0.982031	-4.56462
Adrbk2	2.53445	4.1808	1.98607	0.0657922	0.982031	-4.56509
Ptger1	1.65794	5.50634	1.98602	0.0657981	0.982031	-4.53918
Kdelc1	3.54039	1.88863	1.98597	0.065804	0.982031	-4.58017
Rapgef1	-1.19612	7.81234	-1.98386	0.0660606	0.982031	-4.40814
Tmem164	2.25186	4.95689	1.98262	0.0662108	0.982031	-4.55255
2410004N09Rik	-3.40086	1.36479	-1.98133	0.0663696	0.982031	-4.58136
Dock6	3.44762	-0.849485	1.97991	0.0665428	0.982031	-4.58146
Abcf2	2.84754	3.11155	1.97974	0.0665634	0.982031	-4.57511
Pdcd4	1.41949	5.76064	1.97844	0.0667231	0.982031	-4.53212
Nipsnap1	2.02163	-3.4455	1.97718	0.0668776	0.982031	-4.55177
Rfxank	-3.33712	-0.413622	-1.97566	0.0670661	0.982031	-4.58211
Itga5	3.49966	2.05024	1.97488	0.0671616	0.982031	-4.57992
Bhlhe41	-0.725548	7.78372	-1.97438	0.0672238	0.982031	-4.41314
Mphosph10	3.01293	2.91509	1.97352	0.0673303	0.982031	-4.5764
Irgq	2.62096	4.0938	1.97304	0.0673893	0.982031	-4.5666
Dennd3	3.1389	-3.69782	1.97132	0.0676032	0.982031	-4.54443
Hnrnpdl	0.841005	6.38611	1.97109	0.0676317	0.982031	-4.50909
Bend5	3.74736	-1.46314	1.97106	0.067636	0.982031	-4.57924
4930550C14Rik	-3.07682	-2.90614	-1.97057	0.067697	0.982031	-4.56388
Fastkd3	4.19622	1.2711	1.97012	0.0677529	0.982031	-4.58168
Txnl4a	2.02162	5.43486	1.96979	0.067793	0.982031	-4.54215
Atad5	4.00093	0.819685	1.96925	0.0678609	0.982031	-4.58221
Hpca	-2.55449	-3.12423	-1.9692	0.0678674	0.982031	-4.55978
Map1b	-2.10086	1.09278	-1.96802	0.0680151	0.982031	-4.58195
9330133O14Rik	-3.85203	1.42072	-1.96791	0.0680286	0.982031	-4.58147
Anks1	2.35389	5.08416	1.96617	0.0682462	0.982031	-4.55072
Leprotl1	-1.60237	5.4279	-1.96614	0.0682502	0.982031	-4.54256
Eid2	4.27536	-0.456955	1.9651	0.068381	0.982031	-4.58224
Tmem19	3.74524	3.1403	1.96483	0.0684147	0.982031	-4.57527
Kif9	3.46933	1.07192	1.96415	0.0684996	0.982031	-4.58203
Wdr13	-3.09458	5.34868	-1.96402	0.0685167	0.982031	-4.54471
Stx7	1.06881	7.47624	1.9631	0.0686324	0.982031	-4.44328
Zdhhc21	-1.67114	4.53117	-1.9624	0.0687205	0.982031	-4.56103
Ccdc117	-1.87981	5.21767	-1.96163	0.0688181	0.982031	-4.54799
Psmd8	2.2301	4.56402	1.96055	0.0689547	0.982031	-4.5606
Zfp433	-2.17147	4.2427	-1.96023	0.0689953	0.982031	-4.56519
Coq9	-4.16447	0.101266	-1.95975	0.0690555	0.982031	-4.58259
Lpp	1.5935	6.94632	1.95907	0.0691415	0.982031	-4.48138
Lsp1	1.36816	3.96807	1.95683	0.0694259	0.982031	-4.56855
H2-T23	-1.53756	6.00866	-1.95606	0.069525	0.982031	-4.52552
Cttnbp2	-0.986514	-3.912	-1.95555	0.0695896	0.982031	-4.53822
Scnm1	2.59634	2.94566	1.95501	0.0696587	0.982031	-4.57664
Atg14	2.99786	2.3256	1.9545	0.069724	0.982031	-4.5794
Ssr3	1.05612	7.70954	1.9537	0.0698262	0.982031	-4.42473
Zfp865	-1.47172	5.24342	-1.95269	0.0699557	0.982031	-4.54789
Fkbp1b	2.93304	-2.5299	1.9517	0.0700821	0.982031	-4.57017
Agbl5	-4.10854	1.24053	-1.95096	0.0701772	0.982031	-4.58202
Hyal1	-2.39613	-2.99891	-1.95091	0.0701847	0.982031	-4.56295
Crat	2.15658	5.77648	1.95046	0.0702423	0.982031	-4.53368
Nod2	3.09218	-2.22237	1.94897	0.070434	0.982031	-4.57381
Nkapl	3.38407	-2.45917	1.94889	0.0704447	0.982031	-4.57115
Akt1	-1.28733	6.84833	-1.94861	0.0704802	0.982031	-4.48848
Efhd2	-1.01805	7.79871	-1.94845	0.0705008	0.982031	-4.41739
Rpgrip1l	3.09154	2.87129	1.94845	0.070501	0.982031	-4.57718
Tprn	4.30814	-0.343043	1.94775	0.0705922	0.982031	-4.58259
Zfp369	2.91512	2.56466	1.94771	0.0705968	0.982031	-4.57861
Rad9a	-1.74381	4.32056	-1.94746	0.070629	0.982031	-4.56463
Mina	-3.80915	0.0836827	-1.94715	0.0706699	0.982031	-4.58277
Zfp395	4.22191	3.20239	1.94712	0.0706726	0.982031	-4.57529
Elmo2	1.83189	5.23647	1.94636	0.0707722	0.982031	-4.54841
Ppm1k	-1.60522	4.10056	-1.94595	0.0708242	0.982031	-4.56742
Zfp607	3.24096	2.31379	1.9458	0.0708449	0.982031	-4.5796
Pin1	-3.94688	-0.0103591	-1.9443	0.0710385	0.982031	-4.58279
Mex3a	4.23871	1.15622	1.94198	0.0713408	0.982031	-4.58227
Usp47	-1.13449	5.90765	-1.94157	0.071395	0.982031	-4.53016
Cdc42bpa	1.18434	5.37691	1.94128	0.0714325	0.982031	-4.54537
4930503L19Rik	3.30697	1.7002	1.93963	0.0716483	0.982031	-4.5814
Cdk12	-0.835549	7.36486	-1.93887	0.0717483	0.982031	-4.45634
Cdk10	-1.88257	4.42942	-1.93867	0.0717745	0.982031	-4.56347
Scfd2	2.96815	1.00842	1.93834	0.0718176	0.982031	-4.5825
Vps72	-2.42214	3.57256	-1.93811	0.0718475	0.982031	-4.57282
Trip13	-3.50368	-2.57688	-1.93805	0.0718566	0.982031	-4.56997
Mlxipl	0.491449	9.00344	1.938	0.0718632	0.982031	-4.25885
Snhg11	3.95447	2.74791	1.93798	0.0718657	0.982031	-4.578
Khk	-2.30302	4.53437	-1.93734	0.0719491	0.982031	-4.56199
Tspan32	-4.14536	-1.51867	-1.93714	0.0719759	0.982031	-4.57957
Sdk1	3.14832	1.86862	1.93631	0.0720845	0.982031	-4.58107
Ctss	-0.397271	11.8769	-1.93549	0.0721936	0.982031	-4.33823
Fsd1l	2.252	-3.96256	1.93463	0.0723066	0.982031	-4.53824
Zfp119b	3.69305	-0.895861	1.93288	0.0725387	0.982031	-4.5821
Aldh18a1	3.87429	-0.183164	1.93222	0.0726251	0.982031	-4.58291
Naa40	3.87234	1.41442	1.93194	0.0726631	0.982031	-4.58206
Mipol1	-1.43934	-3.30265	-1.92988	0.0729365	0.982031	-4.55761
Mrpl46	4.84438	-0.25449	1.9297	0.0729609	0.982031	-4.58291
Nfx1	-1.32321	6.2268	-1.92945	0.0729935	0.982031	-4.51977
Gm14446	2.81414	-3.71582	1.92939	0.0730026	0.982031	-4.54633
Slc1a5	3.47723	-2.29087	1.9292	0.0730274	0.982031	-4.57361
Sec16b	4.45458	0.368359	1.92791	0.0731999	0.982031	-4.58305
Ercc6l2	-3.86128	2.50251	-1.9273	0.0732812	0.982031	-4.57926
Galc	-2.72034	3.8138	-1.92688	0.0733369	0.982031	-4.57102
Brd1	-1.35864	6.4664	-1.92413	0.0737055	0.982031	-4.5104
Nom1	3.20646	2.80271	1.92405	0.0737171	0.982031	-4.57803
Zfp830	3.53455	3.72668	1.92384	0.0737446	0.982031	-4.5719
Bdp1	1.11881	6.32013	1.92377	0.0737543	0.982031	-4.51661
Clpp	2.77071	0.6485	1.92321	0.0738298	0.982031	-4.58301
Prr14	2.39625	5.27704	1.92219	0.0739672	0.982031	-4.54885
Cd274	4.13192	1.00388	1.92213	0.0739758	0.982031	-4.58275
Lrp5	-1.23452	6.31254	-1.92105	0.0741214	0.982031	-4.51718
Nlrc5	-4.39856	-0.571693	-1.91957	0.0743212	0.982031	-4.58281
Cog2	-2.08703	3.23897	-1.91862	0.0744503	0.982031	-4.57573
Eprs	-1.06492	6.52847	-1.91856	0.074458	0.982031	-4.50823
Pax6	1.43305	-3.64857	1.91845	0.0744736	0.982031	-4.54908
P2rx4	-2.52354	5.48532	-1.91732	0.0746267	0.982031	-4.54414
Pex3	3.68491	2.73283	1.91697	0.074674	0.982031	-4.5785
Amigo3	4.65588	-0.188667	1.91654	0.0747323	0.982031	-4.58314
Ftsj3	-3.00406	2.99313	-1.91517	0.0749198	0.982031	-4.57726
Sfpq	0.980596	7.73245	1.91348	0.0751507	0.982031	-4.43114
Tank	2.18159	4.10351	1.91294	0.0752238	0.982031	-4.56848
Grik3	2.67689	-3.30687	1.91228	0.075315	0.982031	-4.55832
Gtf3a	-1.65767	4.42033	-1.91013	0.0756094	0.982031	-4.56468
Tsen15	4.14507	0.432433	1.90959	0.0756837	0.982031	-4.5833
Gm166	3.1603	0.0381355	1.9095	0.075696	0.982031	-4.58332
Phf14	-0.562762	7.45632	-1.90848	0.0758378	0.982031	-4.45484
Fbxo30	-3.09106	2.97226	-1.90842	0.075845	0.982031	-4.57751
Inpp5k	-1.89783	4.55192	-1.90832	0.0758595	0.982031	-4.5629
Dusp28	-2.67037	-2.7322	-1.90763	0.0759545	0.982031	-4.5688
2610203C22Rik	1.73633	4.10178	1.90678	0.0760717	0.982031	-4.5687
LOC101243624	2.32153	-2.78465	1.9067	0.0760834	0.982031	-4.56808
Gm16796	2.09335	-3.98474	1.90663	0.0760934	0.982031	-4.5396
D230025D16Rik	-2.94993	3.681	-1.90553	0.0762452	0.982031	-4.57282
B3galt5	3.48169	3.49857	1.90527	0.0762809	0.982031	-4.57427
Dzank1	-3.50168	-2.81152	-1.90507	0.076309	0.982031	-4.56773
4933411K16Rik	-3.29969	-2.90084	-1.90471	0.0763593	0.982031	-4.56635
Zfp318	0.981416	6.94683	1.90421	0.0764285	0.982031	-4.48885
Zbtb8os	-3.42785	-0.698283	-1.90154	0.0767992	0.982031	-4.58295
Cpsf4l	2.0595	-3.98953	1.90037	0.0769629	0.982031	-4.53991
Ntn1	4.10524	-1.83241	1.89865	0.077204	0.982031	-4.57835
Npat	1.8438	5.21842	1.89816	0.0772724	0.982031	-4.5515
Hmg20b	1.9748	3.67822	1.8974	0.077379	0.982031	-4.57307
Akna	-0.837602	7.98169	-1.89719	0.0774088	0.982031	-4.41125
Osbpl7	2.90789	0.430896	1.89665	0.0774848	0.982031	-4.58349
Galm	3.97356	2.07377	1.89471	0.0777582	0.982031	-4.58126
Uba3	-2.08927	4.04377	-1.89443	0.0777974	0.982031	-4.56973
Hnrnpm	1.23011	6.60658	1.89438	0.0778051	0.982031	-4.50736
Cbll1	1.15706	5.38928	1.89428	0.0778188	0.982031	-4.5479
Mcfd2	1.00104	5.77346	1.8942	0.0778296	0.982031	-4.5379
Tvp23a	2.26149	-2.26213	1.89344	0.0779376	0.982031	-4.57483
Mtch2	2.68835	4.19039	1.8926	0.0780567	0.982031	-4.56818
Acad10	3.21881	-1.39337	1.89246	0.0780752	0.982031	-4.581
Clk1	0.688059	9.48937	1.89185	0.0781624	0.982031	-4.1959
Hcfc2	3.46033	1.71715	1.89176	0.0781745	0.982031	-4.58215
H2-T24	-1.42223	5.03028	-1.89154	0.0782062	0.982031	-4.55564
0610009L18Rik	-2.16341	-2.43329	-1.89118	0.078257	0.982031	-4.57308
Twf2	0.816308	6.61275	1.89108	0.0782718	0.982031	-4.50745
Mat2b	3.19176	3.74964	1.89086	0.0783025	0.982031	-4.57264
Tssc1	-4.2296	0.454593	-1.89078	0.0783142	0.982031	-4.58357
Lrrc47	-1.93259	5.84305	-1.89068	0.0783284	0.982031	-4.53613
Emx2	2.00488	-3.99729	1.89005	0.0784175	0.982031	-4.54043
Letm2	3.93553	0.717172	1.88937	0.0785149	0.982031	-4.58347
Zfp324	2.00697	3.19411	1.88853	0.0786338	0.982031	-4.57672
Gm14327	1.95209	-3.21803	1.88841	0.0786518	0.982031	-4.56128
Prss53	3.27164	-1.53361	1.88826	0.0786726	0.982031	-4.58041
Lrrc51	-4.4225	-1.51597	-1.88798	0.0787131	0.982031	-4.58051
Plcl2	0.978245	7.57427	1.88747	0.0787848	0.982031	-4.44966
Ifi203	-1.11545	-3.89592	-1.88676	0.0788873	0.982031	-4.5433
Mknk2	3.36642	3.51908	1.88675	0.0788887	0.982031	-4.5746
Lsm10	3.11496	2.10723	1.88642	0.0789353	0.982031	-4.58131
Hirip3	-3.20657	2.10451	-1.88585	0.0790166	0.982031	-4.58133
Pdk3	3.29438	1.00311	1.8855	0.0790675	0.982031	-4.5833
Exog	2.6708	2.33355	1.8842	0.0792526	0.982031	-4.58067
Pgam2	-2.38031	-2.53003	-1.88408	0.0792699	0.982031	-4.57217
A930005H10Rik	-4.4732	-0.065816	-1.88383	0.0793063	0.982031	-4.58367
Wdr1	1.06428	6.24766	1.88295	0.0794333	0.982031	-4.52332
Tpst1	-3.5683	0.530973	-1.88218	0.0795441	0.982031	-4.58367
Ppp1r12b	4.29711	1.55508	1.88162	0.0796241	0.982031	-4.58262
Rpl10	-0.445185	8.65847	-1.88158	0.0796293	0.982031	-4.33542
Pcdh10	3.27141	-3.00821	1.8811	0.0796989	0.982031	-4.56546
H2afx	3.87969	-0.619545	1.88098	0.079716	0.982031	-4.58335
Cops8	-4.05423	0.875916	-1.8806	0.0797711	0.982031	-4.58349
Rpe	2.20843	4.16812	1.88019	0.07983	0.982031	-4.56885
Rps24	-0.53986	7.49389	-1.87947	0.0799339	0.982031	-4.45732
Pced1a	2.95005	3.28907	1.87947	0.0799344	0.982031	-4.57635
Gucy2f	3.5833	-1.92459	1.87809	0.0801336	0.982031	-4.57812
Hipk2	1.49834	5.64389	1.87774	0.0801852	0.982031	-4.54265
Tigd5	2.35718	-3.16525	1.87768	0.0801945	0.982031	-4.56277
Rpusd4	-3.85877	-0.420426	-1.87736	0.0802407	0.982031	-4.58358
Tdo2	-1.86372	-3.53779	-1.87649	0.0803658	0.982031	-4.5545
Cog4	3.65911	1.93628	1.8764	0.0803793	0.982031	-4.58192
Rheb	-3.38271	2.76437	-1.87575	0.0804745	0.982031	-4.57921
Tmem67	3.88946	-0.537654	1.87539	0.0805265	0.982031	-4.58351
Zfp106	0.457373	7.66458	1.87524	0.0805477	0.982031	-4.44486
Fzr1	-4.25798	1.1961	-1.87486	0.0806043	0.982031	-4.58325
Tmod1	3.77261	2.12801	1.87424	0.0806933	0.982031	-4.58147
Mylk	-2.45327	-2.88512	-1.87413	0.0807101	0.982031	-4.5677
Scamp1	-0.731886	6.7892	-1.87411	0.080713	0.982031	-4.50109
Fcer1g	-0.46624	9.96326	-1.87362	0.0807844	0.982031	-4.12662
Uspl1	1.47445	4.85185	1.87359	0.0807895	0.982031	-4.55969
Dbr1	2.70709	0.382307	1.87291	0.0808875	0.982031	-4.58385
Brwd1	0.923813	7.81357	1.87253	0.0809439	0.982031	-4.4328
Ccdc77	4.26741	0.945158	1.87238	0.0809652	0.982031	-4.58355
Ppm1g	1.96468	5.02447	1.87184	0.0810446	0.982031	-4.55674
Tmem41b	-2.18574	4.44287	-1.87181	0.0810484	0.982031	-4.56584
Fam118a	3.361	-1.71831	1.87122	0.0811353	0.982031	-4.57968
4930538K18Rik	2.67273	-3.51861	1.87077	0.0812018	0.982031	-4.55529
Hint1	-2.81816	2.25427	-1.87059	0.0812276	0.982031	-4.58117
Smg6	-1.18815	5.9678	-1.86889	0.0814773	0.982031	-4.53402
Wdr92	3.15057	0.461439	1.86735	0.0817047	0.982031	-4.58391
A230046K03Rik	-0.756093	7.70916	-1.86731	0.0817104	0.982031	-4.44284
Dock7	0.84739	6.62278	1.86729	0.081713	0.982031	-4.50971
Tdp1	-4.15207	-0.109303	-1.86712	0.0817379	0.982031	-4.5839
Zik1	-3.93978	-0.889331	-1.86674	0.081795	0.982031	-4.58315
Ufm1	1.67299	4.41022	1.86552	0.0819741	0.982031	-4.5665
Cept1	1.30677	4.67635	1.86552	0.0819744	0.982031	-4.56282
Cacna1s	-1.30362	-3.8051	-1.86491	0.0820647	0.982031	-4.54738
Mrpl48	4.20718	1.77808	1.86488	0.0820697	0.982031	-4.58247
Slc23a1	-3.51988	-2.13891	-1.86319	0.0823201	0.982031	-4.57673
Mfsd10	-2.47935	2.53298	-1.86218	0.0824706	0.982031	-4.5804
Sub1	2.23468	5.64076	1.86209	0.0824831	0.982031	-4.5438
Tmem14c	-2.06435	4.6424	-1.86089	0.082662	0.982031	-4.56352
Ube2e1	2.2166	2.34269	1.86072	0.0826874	0.982031	-4.58108
Lrfn1	-2.63406	-2.15016	-1.86063	0.0827002	0.982031	-4.5767
Retsat	3.8446	-0.493132	1.86003	0.0827902	0.982031	-4.58378
Msh3	-3.7588	0.297303	-1.85932	0.0828957	0.982031	-4.58406
Cdk20	-3.46536	1.57049	-1.85914	0.0829237	0.982031	-4.58295
Xlr4a	3.01144	-2.38459	1.85909	0.0829307	0.982031	-4.57449
Wdr90	-2.21757	-3.36183	-1.85907	0.0829335	0.982031	-4.55958
Dcun1d4	3.02729	2.92839	1.85859	0.083006	0.982031	-4.57882
Stmn4	-3.18795	-2.6119	-1.85817	0.083068	0.982031	-4.57196
Gzf1	-2.32105	3.63521	-1.85748	0.0831722	0.982031	-4.57451
Tgm4	3.61062	-1.65543	1.85706	0.0832347	0.982031	-4.58033
Filip1l	0.783703	7.9564	1.85657	0.0833081	0.982031	-4.42353
Tbc1d2b	1.30782	6.20564	1.85546	0.083475	0.982031	-4.52736
Skap1	3.93868	-2.70245	1.85517	0.0835178	0.982031	-4.57091
Gtf2i	1.3009	6.84851	1.85372	0.0837362	0.982031	-4.50073
Pigx	3.82781	1.52584	1.85348	0.0837726	0.982031	-4.58312
Gm13807	2.0634	-3.30403	1.85333	0.0837951	0.982031	-4.56107
Rhobtb2	4.07499	1.23242	1.85215	0.0839739	0.982031	-4.58356
Sav1	-2.55632	3.95633	-1.85205	0.0839879	0.982031	-4.57193
Rpl14	-0.704417	7.13115	-1.85156	0.0840627	0.982031	-4.48585
Syt4	1.76997	-3.7045	1.85133	0.0840971	0.982031	-4.55131
Anapc10	-2.57712	3.49523	-1.85128	0.0841051	0.982031	-4.57569
Hyal3	-2.75756	-3.33406	-1.85039	0.0842403	0.982031	-4.56058
Ube2q1	-1.79954	6.49313	-1.85037	0.0842424	0.982031	-4.51707
Flna	-1.88211	5.37988	-1.85033	0.0842488	0.982031	-4.55075
Plekha5	-3.51736	0.626285	-1.8503	0.0842532	0.982031	-4.58409
Pfdn4	3.3189	-0.556268	1.85019	0.0842696	0.982031	-4.58387
Adamtsl2	-3.23922	-2.18727	-1.84995	0.0843065	0.982031	-4.57663
Adra2a	-3.02846	-3.10666	-1.84963	0.0843558	0.982031	-4.565
Gtf2h1	2.45856	3.59453	1.84898	0.0844542	0.982031	-4.57504
Slc27a1	-4.11967	0.521563	-1.84793	0.0846129	0.982031	-4.58417
Mfsd11	-1.94174	5.06505	-1.84785	0.0846249	0.982031	-4.5572
Nr3c2	1.57375	3.83854	1.84606	0.0848981	0.982031	-4.57317
Tsen2	-4.08617	-0.786567	-1.84552	0.084981	0.982031	-4.58367
Omg	-4.21794	1.62871	-1.84437	0.0851566	0.982031	-4.58309
Rab8b	0.829623	7.98543	1.84436	0.0851573	0.982031	-4.42376
Zmat1	2.37602	4.32292	1.84371	0.0852581	0.982031	-4.56836
Tyk2	2.02341	5.66089	1.84357	0.0852795	0.982031	-4.54455
2700038G22Rik	3.03862	-1.49841	1.84322	0.0853325	0.982031	-4.58142
Gm13157	2.36152	3.62265	1.8432	0.0853356	0.982031	-4.57499
Lrrc20	3.83651	-1.8461	1.84314	0.0853451	0.982031	-4.57943
Dyrk3	1.7756	-4.03047	1.84257	0.0854328	0.982031	-4.54296
Raver1	-2.01854	5.98992	-1.84226	0.0854799	0.982031	-4.5355
Map3k13	-3.26596	-2.78614	-1.84224	0.0854836	0.982031	-4.57023
Stk17b	-1.81959	5.64242	-1.84222	0.0854868	0.982031	-4.54511
Dock1	-1.77237	4.86871	-1.84142	0.0856097	0.982031	-4.5609
Hdac7	-1.63633	-3.7511	-1.84127	0.0856327	0.982031	-4.55053
Mthfsd	-3.85008	-1.11105	-1.84075	0.0857118	0.982031	-4.58297
Zc3h8	3.77662	1.63815	1.83873	0.0860236	0.982031	-4.58316
D8Ertd82e	-2.46067	5.68285	-1.8382	0.0861051	0.982031	-4.54436
Cox4i1	-1.43474	6.1568	-1.83789	0.0861529	0.982031	-4.53059
Rbfox2	4.64327	-0.457446	1.83693	0.086301	0.982031	-4.58415
Stip1	3.06829	3.99259	1.83592	0.0864585	0.982031	-4.57209
Relb	4.13983	-0.564171	1.83566	0.0864993	0.982031	-4.58408
Ruvbl1	-1.86811	3.38939	-1.83524	0.0865636	0.982031	-4.5768
Smc2	3.50772	2.42612	1.83513	0.0865805	0.982031	-4.58129
Edrf1	-1.97938	4.19598	-1.83498	0.0866037	0.982031	-4.57009
Cul1	0.811535	7.37282	1.83493	0.0866115	0.982031	-4.47365
2410127L17Rik	3.5196	0.451305	1.83479	0.086634	0.982031	-4.58439
Impad1	-2.04076	3.80568	-1.83421	0.0867234	0.982031	-4.5738
Ntm	2.35019	-3.00584	1.83358	0.0868212	0.982031	-4.56731
Zzz3	-0.572597	6.21918	-1.83305	0.0869044	0.982031	-4.52894
AA474331	-3.44875	-2.47554	-1.83266	0.086965	0.982031	-4.57427
Eno3	2.92795	2.94639	1.83178	0.0871018	0.982031	-4.57931
Fam175b	2.13801	5.04505	1.83087	0.0872447	0.982031	-4.55842
Rab3a	4.27098	-1.20094	1.8308	0.0872553	0.982031	-4.58284
Mroh6	3.61567	-3.2292	1.83075	0.0872633	0.982031	-4.56356
Peo1	4.28857	-0.614868	1.83074	0.0872647	0.982031	-4.58411
Fastk	2.6649	3.01462	1.83063	0.0872816	0.982031	-4.57901
Farsb	-1.80196	4.27547	-1.83063	0.0872825	0.982031	-4.56937
Psmd13	-3.32847	0.350189	-1.8305	0.0873032	0.982031	-4.58447
Samd9l	-4.6159	-0.75919	-1.82956	0.0874503	0.982031	-4.58396
Arhgap44	1.85487	-3.41033	1.82934	0.0874838	0.982031	-4.55993
Olfr649	1.71677	-4.03915	1.82908	0.0875248	0.982031	-4.54372
Ap5z1	3.35113	1.94557	1.82856	0.0876062	0.982031	-4.58271
Letm1	2.75302	4.57756	1.82754	0.0877663	0.982031	-4.56579
Polr2k	-3.67635	-0.671439	-1.82707	0.0878398	0.982031	-4.5841
Rnf19a	2.67875	3.54704	1.82533	0.0881149	0.982031	-4.57601
Ak1	-2.28709	4.06435	-1.82504	0.0881597	0.982031	-4.57175
5730405O15Rik	3.86433	-1.08259	1.82418	0.0882961	0.982031	-4.58333
Wdr19	-2.62994	-2.52952	-1.82374	0.0883659	0.982031	-4.57394
Tbc1d4	-3.2366	1.69387	-1.82368	0.0883752	0.982031	-4.5833
Alox5ap	-0.702617	7.45375	-1.82239	0.0885789	0.982031	-4.47051
AI467606	3.01524	3.18591	1.82201	0.0886391	0.982031	-4.57832
Prpf39	-1.06189	6.76161	-1.82196	0.0886475	0.982031	-4.50882
Il2rg	4.39787	-0.713941	1.8218	0.0886729	0.982031	-4.58414
Vopp1	-4.18473	-1.4729	-1.82177	0.0886783	0.982031	-4.58192
S1pr2	-3.17789	-1.38526	-1.82134	0.0887468	0.982031	-4.5823
Strn4	2.23329	3.82327	1.82096	0.0888058	0.982031	-4.57404
Xkr9	2.51246	-3.76692	1.8203	0.088911	0.982031	-4.55133
Tjap1	-4.45402	0.826145	-1.82008	0.0889465	0.982031	-4.58442
Snx11	3.95545	1.68212	1.81973	0.0890018	0.982031	-4.58339
Esyt2	1.76335	4.20426	1.8192	0.0890869	0.982031	-4.57054
Erap1	-1.46527	5.7485	-1.81855	0.0891903	0.982031	-4.54406
Abcb8	3.57066	2.29455	1.81853	0.0891938	0.982031	-4.582
Rap1gap	-4.13023	-1.88787	-1.81767	0.0893299	0.982031	-4.57968
Rab40c	3.6801	0.877728	1.81758	0.0893452	0.982031	-4.58442
Myl6b	-2.80905	-3.23818	-1.81736	0.0893797	0.982031	-4.56397
Sall3	-0.919345	7.09593	-1.81612	0.0895779	0.982031	-4.49307
LOC100503676	3.16487	-1.60558	1.81578	0.0896328	0.982031	-4.5814
1700001G17Rik	1.71462	-3.54926	1.81514	0.0897343	0.982031	-4.55745
Cry2	4.51242	0.31334	1.81444	0.0898478	0.982031	-4.58471
Ttc38	4.04316	0.722174	1.81435	0.0898616	0.982031	-4.58457
Abhd15	1.10036	6.37181	1.81355	0.0899907	0.982031	-4.52547
Ick	-1.99338	4.51522	-1.8135	0.0899975	0.982031	-4.56716
Ralgapa2	-2.15654	4.58831	-1.81309	0.0900642	0.982031	-4.56623
Gm13212	3.24283	-1.74579	1.81304	0.0900717	0.982031	-4.58069
Pak4	3.84453	3.05546	1.81174	0.0902815	0.982031	-4.57923
Nlgn2	-3.03301	-0.26404	-1.81018	0.0905328	0.982031	-4.58466
1700034J05Rik	2.0008	-3.44219	1.80989	0.09058	0.982031	-4.56019
Ing2	-3.69497	2.29207	-1.80974	0.0906044	0.982031	-4.58216
Pdzrn3	-1.71444	-3.27416	-1.80941	0.0906582	0.982031	-4.56364
Lrrd1	2.16686	-3.36142	1.80819	0.0908553	0.982031	-4.56197
Stk3	-2.38546	3.56939	-1.80732	0.0909972	0.982031	-4.57633
Wdr61	-2.85991	2.85966	-1.80652	0.0911265	0.982031	-4.58023
Npnt	-2.27663	5.27957	-1.80637	0.0911514	0.982031	-4.55537
Tfe3	1.27581	7.01952	1.80634	0.0911562	0.982031	-4.49848
Ncdn	3.3072	1.45613	1.80627	0.0911671	0.982031	-4.58397
Nhs	2.90552	-1.25282	1.80618	0.0911816	0.982031	-4.58308
Rsl1	3.60581	2.10584	1.80565	0.0912672	0.982031	-4.58273
Lekr1	-3.21468	-2.19035	-1.80562	0.0912736	0.982031	-4.57769
Zfp91Cntf	-3.53131	-2.78321	-1.80558	0.0912799	0.982031	-4.57149
Rangrf	-1.83082	-3.43905	-1.80538	0.0913113	0.982031	-4.56048
Sox13	2.30924	-2.79496	1.80532	0.0913209	0.982031	-4.57135
Lrrc55	1.61554	-4.05422	1.80455	0.0914472	0.982031	-4.54513
Ric3	-2.78947	4.01291	-1.804	0.0915364	0.982031	-4.57291
Map7	3.16597	1.17961	1.80357	0.0916063	0.982031	-4.58436
Pdpk1	-1.01732	6.72376	-1.80299	0.0917009	0.982031	-4.51277
Anapc2	-2.21218	5.02742	-1.8028	0.0917335	0.982031	-4.56013
Krtcap3	-2.35395	-2.72229	-1.80236	0.0918039	0.982031	-4.57236
BC020402	-2.77836	-1.0004	-1.80209	0.0918496	0.982031	-4.58391
BC051226	-1.8409	-2.85607	-1.802	0.0918636	0.982031	-4.57065
Zscan25	-2.83513	-2.19117	-1.80199	0.0918648	0.982031	-4.57777
Scamp2	0.997428	8.02503	1.80146	0.0919515	0.982031	-4.43067
Gins2	-3.6044	-0.778563	-1.8008	0.0920601	0.982031	-4.58436
Amfr	-1.02377	6.73655	-1.80025	0.0921506	0.982031	-4.51255
Olfr1030	3.05903	-2.70278	1.80001	0.0921905	0.982031	-4.57267
Cd81	-0.417617	10.9297	-1.79977	0.0922289	0.982031	-4.15608
Abcf1	-1.41479	5.16766	-1.79915	0.0923315	0.982031	-4.55787
Cyba	-0.788247	6.1386	-1.79894	0.0923651	0.982031	-4.5346
Arhgef4	3.9525	-0.277819	1.7984	0.0924551	0.982031	-4.58483
Rab3ip	1.58671	5.13173	1.79835	0.0924633	0.982031	-4.55855
Dennd1c	-0.816719	6.80224	-1.79831	0.0924689	0.982031	-4.50991
Slc35a2	2.67986	1.7011	1.7974	0.0926195	0.982031	-4.58372
Aptx	2.93148	3.3548	1.79697	0.0926897	0.982031	-4.57796
Ptger3	3.61597	-1.50357	1.79681	0.092717	0.982031	-4.58224
Brms1l	-3.53235	1.96327	-1.79676	0.0927252	0.982031	-4.58321
Pnma1	2.53053	-2.96207	1.79624	0.0928114	0.982031	-4.56937
1110038B12Rik	3.39269	1.16999	1.79565	0.0929076	0.982031	-4.58449
Acy1	2.82342	1.51911	1.79467	0.0930701	0.982031	-4.58406
Gnb2l1	-0.753456	7.43805	-1.79447	0.093103	0.982031	-4.47648
Ppp1r7	-1.46235	5.41941	-1.79432	0.0931281	0.982031	-4.55326
Matr3	1.16619	6.51951	1.7943	0.093131	0.982031	-4.522
Amn1	3.48134	1.91871	1.79418	0.0931515	0.982031	-4.58335
Ccdc55	2.64953	3.88162	1.79367	0.0932367	0.982031	-4.57436
Slc39a12	2.10548	2.38076	1.79212	0.0934933	0.982031	-4.58223
Gm6568	-0.77857	-3.94242	-1.79186	0.0935358	0.982031	-4.54851
Stard6	1.9421	-3.14887	1.79124	0.0936403	0.982031	-4.56665
2010111I01Rik	-3.15267	3.27008	-1.78996	0.0938537	0.982031	-4.57861
Ccdc86	-3.33069	2.74365	-1.78993	0.0938577	0.982031	-4.58104
Gpatch11	3.63721	0.775165	1.78927	0.0939685	0.982031	-4.58491
Pdgfrl	2.54934	-2.47693	1.78915	0.0939885	0.982031	-4.57549
Klc4	3.11336	2.18224	1.78744	0.094274	0.982031	-4.58286
Rbm41	1.59601	4.21719	1.78666	0.0944051	0.982031	-4.57151
Swsap1	-3.55712	-2.05386	-1.78644	0.0944422	0.982031	-4.57921
Rtkn	2.63683	-3.1861	1.78554	0.0945928	0.982031	-4.56625
Cep128	3.76744	0.554531	1.78531	0.0946308	0.982031	-4.58507
Ccr5	0.683524	9.14736	1.78505	0.0946755	0.982031	-4.30728
Scg2	1.47093	-3.88384	1.78477	0.0947231	0.982031	-4.55033
4921524J17Rik	-2.90011	-2.58431	-1.78432	0.0947988	0.982031	-4.57451
Arih1	1.02125	6.70603	1.78327	0.0949744	0.982031	-4.51585
Tmem11	-3.33179	2.55809	-1.78305	0.0950119	0.982031	-4.58184
Gyk	3.65812	-0.7491	1.78277	0.0950596	0.982031	-4.58468
Zfp866	-1.90098	5.86332	-1.78245	0.0951126	0.982031	-4.54375
2023-09-06	3.71864	-0.541314	1.78242	0.095118	0.982031	-4.58489
Tubgcp2	-2.14267	3.69867	-1.78213	0.0951669	0.982031	-4.5761
Phf23	-2.45146	4.07016	-1.77963	0.0955899	0.982031	-4.57316
Lgi1	-2.0939	-3.51488	-1.77904	0.0956906	0.982031	-4.56013
Sgpp2	2.55995	-2.05922	1.77843	0.0957932	0.982031	-4.57935
H2-T10	-2.16347	-3.36831	-1.77819	0.0958342	0.982031	-4.56324
Slc12a6	0.572588	8.17362	1.77569	0.0962595	0.982031	-4.42386
Noc4l	3.0123	0.00970642	1.77561	0.0962733	0.982031	-4.58525
Pi4k2a	1.07474	5.27976	1.77472	0.0964265	0.982031	-4.55715
Mex3c	2.29222	4.18605	1.77441	0.0964793	0.982031	-4.57224
2410004B18Rik	-2.78926	1.30181	-1.77428	0.0965014	0.982031	-4.58466
Zfp119a	3.2264	-0.0881125	1.77225	0.0968491	0.982031	-4.58528
Scrt1	0.978109	-4.08811	1.77171	0.0969418	0.982031	-4.54673
Tcf3	2.78758	2.93856	1.77163	0.0969545	0.982031	-4.58063
Lsm14a	0.952625	6.99783	1.7716	0.0969594	0.982031	-4.50436
B230217C12Rik	-2.4812	-3.51885	-1.76998	0.097238	0.982031	-4.5605
Stap2	0.861467	-4.11853	1.76968	0.0972896	0.982031	-4.5463
Rab43	1.36673	6.30417	1.76894	0.0974179	0.982031	-4.53209
Cd200r4	1.08638	-4.05995	1.76893	0.0974188	0.982031	-4.54754
Rlbp1	1.08638	-4.05995	1.76893	0.0974188	0.982031	-4.54754
Ehd3	1.10825	-4.05422	1.7679	0.0975965	0.982031	-4.54773
Myo9b	-0.924913	6.88254	-1.76781	0.0976127	0.982031	-4.51019
Aes	-2.0434	3.28759	-1.76781	0.0976136	0.982031	-4.57904
B430010I23Rik	-1.85761	3.48207	-1.76759	0.0976503	0.982031	-4.57793
Psmc3ip	-2.56211	-2.56331	-1.76757	0.0976539	0.982031	-4.57522
Skida1	1.66556	-3.83182	1.76748	0.0976698	0.982031	-4.55273
Clec4a2	-1.85151	4.20245	-1.76729	0.0977027	0.982031	-4.57232
Zfp280b	-3.87821	2.69496	-1.76699	0.0977546	0.982031	-4.58168
Sf3a3	3.37298	3.13731	1.76695	0.0977617	0.982031	-4.57983
Gm4598	1.12863	-4.04887	1.76684	0.0977809	0.982031	-4.54792
Lrfn5	1.12863	-4.04887	1.76684	0.0977809	0.982031	-4.54792
Pisd	0.712695	5.73191	1.76633	0.0978691	0.982031	-4.54817
Gm6793	3.20554	5.94339	1.76597	0.0979312	0.982031	-4.54291
Anxa2	1.14769	-4.04386	1.76576	0.0979681	0.982031	-4.5481
Ccdc114	1.14769	-4.04386	1.76576	0.0979681	0.982031	-4.5481
Rbp1	1.14769	-4.04386	1.76576	0.0979681	0.982031	-4.5481
Anxa13	0.810197	-4.13192	1.76562	0.0979923	0.982031	-4.54637
Htr4	0.810197	-4.13192	1.76562	0.0979923	0.982031	-4.54637
Igsf9b	0.810197	-4.13192	1.76562	0.0979923	0.982031	-4.54637
Hsd3b7	2.287	3.23558	1.76481	0.098132	0.982031	-4.57938
Ropn1l	1.16558	-4.03915	1.76466	0.0981583	0.982031	-4.54827
Bbip1	-2.02429	4.51005	-1.76424	0.0982303	0.982031	-4.56914
Ulk1	1.46619	5.31763	1.76364	0.0983355	0.982031	-4.55706
Kif20b	3.26652	-0.170471	1.76357	0.0983471	0.982031	-4.58538
Olfr461	1.18245	-4.03469	1.76356	0.0983486	0.982031	-4.54844
Pms1	2.78597	-1.24453	1.76303	0.098442	0.982031	-4.58383
Samd11	3.06032	-2.40827	1.76294	0.0984575	0.982031	-4.57687
Leng1	-3.3238	0.987115	-1.76273	0.0984933	0.982031	-4.58515
Gp1ba	-2.73148	-2.77215	-1.76085	0.0988207	0.982031	-4.57311
1700034F02Rik	-2.12837	-3.26819	-1.76081	0.098829	0.982031	-4.56589
5830417I10Rik	-1.34396	6.20134	-1.76039	0.0989009	0.982031	-4.53609
Vstm4	-0.981987	-3.91487	-1.76029	0.098919	0.982031	-4.55125
Ak2	1.90903	5.55763	1.7596	0.09904	0.982031	-4.55252
D17Wsu104e	3.56404	3.28106	1.75956	0.0990463	0.982031	-4.57927
Otc	1.2417	-4.019	1.75945	0.0990664	0.982031	-4.54905
Rasip1	1.2417	-4.019	1.75945	0.0990664	0.982031	-4.54905
Bbx	-1.57165	5.22064	-1.75896	0.0991523	0.982031	-4.55908
Ulk2	-1.08665	7.70253	-1.75883	0.0991749	0.982031	-4.46564
Cyb561a3	-1.3387	6.75491	-1.7582	0.099285	0.982031	-4.51682
Rpl37a	-0.609825	7.31159	-1.75786	0.0993451	0.982031	-4.49021
Fgd6	-4.06308	0.684127	-1.75728	0.0994468	0.982031	-4.58542
Ppap2b	3.54746	-0.869136	1.75659	0.0995671	0.982031	-4.58489
Sfxn2	3.072	3.11266	1.75546	0.099767	0.982031	-4.5802
Cd55	0.747998	-4.148	1.7553	0.0997938	0.982031	-4.54688
Lrrc27	0.747998	-4.148	1.7553	0.0997938	0.982031	-4.54688
Prss39	0.747998	-4.148	1.7553	0.0997938	0.982031	-4.54688
Rad51c	0.747998	-4.148	1.7553	0.0997938	0.982031	-4.54688
Pmm1	3.70941	-1.53954	1.75508	0.0998324	0.982031	-4.58285
Zfp704	-2.12969	4.98264	-1.75486	0.0998712	0.982031	-4.5632
Dpcd	-2.76801	0.36099	-1.75381	0.100057	0.982031	-4.58557
Efna5	0.84206	-3.90148	1.75317	0.10017	0.982031	-4.55201
U2af2	1.98312	6.4692	1.75284	0.100228	0.982031	-4.52816
Ralgapb	-1.04721	6.45599	-1.75173	0.100426	0.982031	-4.52873
Bcorl1	2.98644	0.593507	1.75121	0.100517	0.982031	-4.58555
Mxra7	-2.70093	-3.3193	-1.74996	0.100739	0.982031	-4.56546
Cnksr2	-2.64929	-3.33836	-1.74911	0.100889	0.982031	-4.56515
Espn	-1.52942	-3.78301	-1.74902	0.100906	0.982031	-4.55522
Arhgap27	-0.931227	8.04746	-1.74901	0.100907	0.982031	-4.44171
4930447C04Rik	1.37906	-3.98245	1.74785	0.101113	0.982031	-4.55063
Dusp14	1.37906	-3.98245	1.74785	0.101113	0.982031	-4.55063
Nenf	3.45123	0.551975	1.74718	0.101233	0.982031	-4.58562
Serpinf2	1.38737	-3.98023	1.7471	0.101248	0.982031	-4.55073
Tapbp	-1.1183	6.96519	-1.74655	0.101345	0.982031	-4.50928
Dact3	2.8303	-2.14422	1.74559	0.101518	0.982031	-4.5795
Gm6432	1.43979	-3.77298	1.74522	0.101582	0.982031	-4.55572
A730008H23Rik	-4.28026	0.0918277	-1.74519	0.101589	0.982031	-4.5857
Kifap3	2.35735	3.20269	1.745	0.101623	0.982031	-4.58001
N4bp1	-1.21827	8.10911	-1.74325	0.101937	0.982031	-4.43803
Manbal	2.82023	0.765813	1.7432	0.101945	0.982031	-4.58559
Padi2	-1.2496	6.38866	-1.74315	0.101955	0.982031	-4.53184
Zfp652os	-3.00033	-2.72003	-1.74197	0.102166	0.982031	-4.57432
Rspo1	-3.26788	-1.97274	-1.74193	0.102172	0.982031	-4.58077
Zfp287	3.96862	0.879127	1.74148	0.102254	0.982031	-4.58554
Socs6	1.67912	4.32829	1.74138	0.102272	0.982031	-4.57196
Ica1l	-2.50407	3.51467	-1.74102	0.102337	0.982031	-4.5784
Fancl	2.8061	1.94517	1.74003	0.102516	0.982031	-4.5842
Taf13	2.68616	2.9646	1.7393	0.102648	0.982031	-4.58121
Ntrk2	3.38776	-1.48748	1.73848	0.102794	0.982031	-4.58337
Prr15	-2.40351	-2.76987	-1.73751	0.102971	0.982031	-4.5739
Lphn2	-1.4556	5.24494	-1.73735	0.102999	0.982031	-4.55984
Zfp408	-3.74239	3.14115	-1.73719	0.103029	0.982031	-4.58048
Ppdpf	3.80652	1.66721	1.7361	0.103225	0.982031	-4.58476
Fance	-2.50746	3.27645	-1.73596	0.103252	0.982031	-4.57985
Fkbp15	0.971169	7.04638	1.73573	0.103293	0.982031	-4.50706
Ndufa4	2.0231	4.08874	1.73493	0.103438	0.982031	-4.57442
Usp1	2.53086	2.27161	1.73434	0.103546	0.982031	-4.58357
Rps8	-0.761263	6.85134	-1.73431	0.103551	0.982031	-4.5158
Sirt3	-2.18821	1.0581	-1.73418	0.103576	0.982031	-4.58551
Grid1	1.52728	-3.94242	1.7339	0.103625	0.982031	-4.5524
Il15	2.05056	2.75454	1.7336	0.103681	0.982031	-4.58213
Prdm4	-3.57969	3.86028	-1.73292	0.103803	0.982031	-4.57631
Lrrc25	-3.24087	2.67448	-1.73263	0.103858	0.982031	-4.58243
Cacna2d1	1.54195	-3.93841	1.73232	0.103914	0.982031	-4.55259
Epha5	1.54668	-3.93712	1.73181	0.104007	0.982031	-4.55266
Nkain4	0.669187	-4.16814	1.73048	0.10425	0.982031	-4.54844
Ppp1r14d	0.669187	-4.16814	1.73048	0.10425	0.982031	-4.54844
Spats1	0.669187	-4.16814	1.73048	0.10425	0.982031	-4.54844
Traf1	0.669187	-4.16814	1.73048	0.10425	0.982031	-4.54844
Vil1	0.669187	-4.16814	1.73048	0.10425	0.982031	-4.54844
Trp53tg5	1.56483	-3.93215	1.72984	0.104367	0.982031	-4.55289
Gm14057	3.93845	-2.05094	1.72929	0.104468	0.982031	-4.58053
Dtd2	-3.79075	-0.478031	-1.72881	0.104556	0.982031	-4.58573
Pias3	-3.08032	3.948	-1.72739	0.104816	0.982031	-4.57581
Lypd6	2.4818	-1.50622	1.72712	0.104866	0.982031	-4.5835
Prdm1	1.45826	5.06278	1.72645	0.10499	0.982031	-4.56337
Golm1	0.304942	9.83103	1.72634	0.105011	0.982031	-4.25182
A630007B06Rik	-1.32961	4.83084	-1.72618	0.105039	0.982031	-4.5667
Ccdc173	-2.56428	-2.64667	-1.7259	0.105091	0.982031	-4.57561
Myom1	-2.74859	-1.20415	-1.72469	0.105315	0.982031	-4.58459
Esd	-1.98652	4.20254	-1.72371	0.105494	0.982031	-4.57378
Rit1	3.27968	1.30078	1.72339	0.105555	0.982031	-4.58544
Drosha	2.28134	4.09632	1.72308	0.105612	0.982031	-4.57474
Nr2c2ap	3.40389	-0.495999	1.72307	0.105613	0.982031	-4.5858
Rnf141	-3.35346	-0.646925	-1.72256	0.105709	0.982031	-4.58569
Sh3d19	2.24159	-3.22493	1.72198	0.105815	0.982031	-4.56829
Scn11a	1.64466	-3.91015	1.72112	0.105975	0.982031	-4.55392
Hspa2	-1.59767	-3.68693	-1.72111	0.105978	0.982031	-4.5593
Tor3a	-1.51815	5.99556	-1.72103	0.105992	0.982031	-4.54512
Pogz	-1.5431	7.22796	-1.72072	0.106048	0.982031	-4.50052
Rras2	-2.97826	1.75934	-1.72033	0.106121	0.982031	-4.58486
Itpr2	0.608026	8.29207	1.71965	0.106247	0.982031	-4.42861
Ptn	1.73707	-3.37987	1.71952	0.106272	0.982031	-4.56575
Slc30a7	-1.02556	6.75016	-1.7195	0.106276	0.982031	-4.52163
Cgrrf1	-2.92624	3.38921	-1.71818	0.106522	0.982031	-4.57968
Dusp2	-2.88886	-2.94719	-1.71757	0.106636	0.982031	-4.57243
Pex16	3.03671	-0.857545	1.71711	0.106721	0.982031	-4.58551
Calr4	3.17579	-3.07353	1.71633	0.106867	0.982031	-4.57078
Gap43	1.69047	-3.89747	1.71616	0.106899	0.982031	-4.55451
2610307P16Rik	-1.60216	-3.78471	-1.71582	0.106962	0.982031	-4.5572
B3gat2	-2.59452	0.536058	-1.71572	0.106981	0.982031	-4.58608
Ddx55	3.8188	2.03003	1.7154	0.107041	0.982031	-4.58445
Mkrn2	-2.83952	2.51864	-1.71521	0.107077	0.982031	-4.58325
Ggt5	-2.42448	3.88678	-1.71503	0.10711	0.982031	-4.57664
Gskip	-3.91547	1.18373	-1.71444	0.107222	0.982031	-4.58569
Cideb	1.71224	-3.89142	1.71381	0.107339	0.982031	-4.55479
Ugt1a1	-3.01368	-2.4285	-1.71326	0.107443	0.982031	-4.57804
Trim39	2.30756	3.9618	1.71252	0.107582	0.982031	-4.57615
St18	1.73228	-3.88584	1.71165	0.107745	0.982031	-4.55504
Avpr2	3.29803	-1.68401	1.71142	0.107789	0.982031	-4.58301
Ccl27a	-3.25664	0.414141	-1.71088	0.10789	0.982031	-4.58618
Zfp719	-1.8021	5.49687	-1.71086	0.107894	0.982031	-4.55681
Arglu1	0.424595	8.02657	1.71061	0.107942	0.982031	-4.45276
Slc10a3-ubl4	1.28475	-4.10495	1.70928	0.108193	0.982031	-4.55087
Tlr3	-0.697475	8.2298	-1.70904	0.108238	0.982031	-4.43692
Lig3	-2.53213	3.22534	-1.70872	0.108298	0.982031	-4.58073
Znrf2	-1.34944	4.80351	-1.70862	0.108317	0.982031	-4.56783
Tas2r137	2.31479	-3.73404	1.70807	0.108422	0.982031	-4.55892
Gale	-1.65898	-3.7691	-1.70713	0.1086	0.982031	-4.55811
Cd163	2.66755	-3.49146	1.70681	0.10866	0.982031	-4.56427
Zc3h7a	0.830082	7.66141	1.70651	0.108717	0.982031	-4.4788
Nhp2	-4.15948	-0.519227	-1.70635	0.108747	0.982031	-4.58602
Ppp1r37	-3.2314	1.11216	-1.70596	0.108822	0.982031	-4.58588
Arf6	1.42967	5.46058	1.70416	0.109164	0.982031	-4.5579
Gadl1	-1.44099	-3.65401	-1.70402	0.109191	0.982031	-4.56102
Tinf2	3.07974	1.66142	1.70261	0.10946	0.982031	-4.5853
Nt5c3b	3.24326	-0.83601	1.70228	0.109522	0.982031	-4.58577
2010106C02Rik	2.80094	-2.99287	1.70133	0.109704	0.982031	-4.57244
B230219D22Rik	-1.33736	6.8892	-1.70044	0.109875	0.982031	-4.51855
Zfp455	2.60893	2.599	1.70025	0.10991	0.982031	-4.58329
Nfkbie	-2.81343	2.90781	-1.70012	0.109936	0.982031	-4.58226
Rnf121	3.10508	-0.7451	1.69966	0.110024	0.982031	-4.58593
Pdzd11	3.46017	1.0319	1.69948	0.110058	0.982031	-4.58604
Usp54	2.98334	3.09975	1.6994	0.110075	0.982031	-4.5815
Pptc7	-1.75443	5.93963	-1.69912	0.110128	0.982031	-4.5482
2310001H17Rik	1.86666	-3.84864	1.69861	0.110225	0.982031	-4.55663
Pcnp	1.21106	6.23651	1.69819	0.110305	0.982031	-4.54065
Nim1k	1.51334	-3.99203	1.6981	0.110323	0.982031	-4.55382
Noc3l	-2.75023	2.23413	-1.69789	0.110365	0.982031	-4.58431
Kctd1	-2.94159	-2.17412	-1.69778	0.110385	0.982031	-4.58043
Idh3a	-3.02032	2.09002	-1.69728	0.110481	0.982031	-4.58463
Ubap2	2.6269	3.49053	1.69703	0.11053	0.982031	-4.57966
Rab2a	1.27817	6.86364	1.69645	0.110642	0.982031	-4.52006
Usp36	3.61722	2.99356	1.69565	0.110795	0.982031	-4.58202
Dnttip2	-1.81141	5.68238	-1.69485	0.11095	0.982031	-4.55419
Gdpd5	-1.57521	-3.68248	-1.69438	0.111042	0.982031	-4.56091
Pdcd11	1.88465	4.18403	1.69386	0.111141	0.982031	-4.57494
Ywhae	-0.614524	8.92867	-1.69372	0.111168	0.982031	-4.37457
Gimap1	-2.8307	2.87968	-1.69329	0.111251	0.982031	-4.5825
Ube2d2a	-1.19261	6.43365	-1.69324	0.111261	0.982031	-4.53536
Larp4	0.731663	6.87001	1.69289	0.111329	0.982031	-4.52026
Fyn	-3.57697	-0.115584	-1.6927	0.111367	0.982031	-4.58641
B930059L03Rik	-3.08743	-2.27128	-1.69228	0.111447	0.982031	-4.57985
N6amt2	-3.41622	-1.18837	-1.69119	0.111658	0.982031	-4.58518
Cd4	1.75975	-3.98245	1.69086	0.111724	0.982031	-4.5545
Ap3s2	-2.44274	3.64179	-1.69035	0.111823	0.982031	-4.57896
Gria3	2.49057	-2.41198	1.68994	0.111902	0.982031	-4.57881
Nlrp1b	0.926296	6.32736	1.68942	0.112003	0.982031	-4.53889
Grik2	1.28934	-3.74308	1.6892	0.112045	0.982031	-4.55981
Gatm	0.900635	6.14496	1.68867	0.112149	0.982031	-4.54395
Pitpna	0.829228	6.9226	1.68843	0.112197	0.982031	-4.51876
C030034L19Rik	-3.99979	0.890358	-1.6884	0.112201	0.982031	-4.5863
Gm12338	-1.6517	2.55267	-1.68782	0.112316	0.982031	-4.58367
Cd177	2.1229	-3.89985	1.68718	0.11244	0.982031	-4.55634
Kcnk6	-0.603538	8.06213	-1.68717	0.112443	0.982031	-4.45582
3110002H16Rik	3.61586	1.21569	1.68707	0.112462	0.982031	-4.58607
Tslp	3.58701	-1.15304	1.68691	0.112493	0.982031	-4.58535
Clasrp	1.97582	2.87431	1.6868	0.112515	0.982031	-4.58266
Glb1	2.06296	3.39481	1.68668	0.112538	0.982031	-4.58042
4932438H23Rik	1.60858	-4.01552	1.68636	0.112601	0.982031	-4.55416
Pigb	3.41142	1.35324	1.686	0.112672	0.982031	-4.58595
Snx2	1.50791	6.7	1.68556	0.112758	0.982031	-4.52744
Isg20l2	-3.5206	2.02671	-1.68554	0.112761	0.982031	-4.58496
Sgk2	2.18528	-3.88517	1.68475	0.112917	0.982031	-4.55678
Cacnb3	1.57566	-4.02265	1.6846	0.112945	0.982031	-4.55415
Glrx3	-3.08947	1.26513	-1.68442	0.11298	0.982031	-4.58606
1110065P20Rik	3.85477	-1.10298	1.68409	0.113045	0.982031	-4.58552
Pelp1	-3.02647	2.3559	-1.68371	0.11312	0.982031	-4.58427
Ddah1	-1.89803	-3.41271	-1.68363	0.113136	0.982031	-4.56685
Camp	1.55796	-4.02646	1.68356	0.113149	0.982031	-4.55415
Gpam	2.91446	1.02392	1.68353	0.113156	0.982031	-4.58628
Zdhhc14	1.71949	4.3188	1.68335	0.113191	0.982031	-4.5741
Ikbkb	1.59837	5.41869	1.68325	0.113211	0.982031	-4.5599
Hist1h4i	1.95907	-3.64784	1.68275	0.11331	0.982031	-4.56232
Tmem161b	-2.88179	2.14779	-1.68247	0.113363	0.982031	-4.58476
Fhdc1	1.53931	-4.03047	1.68237	0.113383	0.982031	-4.55416
Chil3	2.48096	-3.81881	1.68229	0.1134	0.982031	-4.55839
Bag1	-1.26863	4.95271	-1.68222	0.113413	0.982031	-4.56708
Srek1	0.922064	6.62849	1.68216	0.113426	0.982031	-4.53027
Slc35d1	3.55151	0.312629	1.68204	0.113449	0.982031	-4.5866
Aste1	-1.98601	2.24295	-1.68037	0.113779	0.982031	-4.58459
Cdc7	-2.42891	-1.61418	-1.6802	0.113812	0.982031	-4.58391
Sec14l1	-0.70805	7.6855	-1.67999	0.113854	0.982031	-4.48255
Cenpl	-3.84835	-0.567148	-1.67961	0.113929	0.982031	-4.58638
Gpsm1	2.49407	1.49096	1.67934	0.113982	0.982031	-4.58589
Tmem254c	2.33617	-3.84959	1.67899	0.114052	0.982031	-4.55785
Mogs	-2.20399	4.24343	-1.67896	0.114057	0.982031	-4.57492
Rnf166	1.1072	6.40934	1.67871	0.114107	0.982031	-4.53753
Smg8	-2.61641	3.48384	-1.67834	0.114179	0.982031	-4.58016
Bclaf1	1.08848	7.55448	1.67814	0.114219	0.982031	-4.49046
Dhfr	2.02927	-2.98406	1.67813	0.114222	0.982031	-4.5734
Orc3	0.464503	8.17846	1.67802	0.114243	0.982031	-4.44936
Magi2	2.36743	-2.85499	1.67795	0.114257	0.982031	-4.57491
F830045P16Rik	1.47662	-4.04386	1.67774	0.114298	0.982031	-4.55424
Slc5a5	1.47662	-4.04386	1.67774	0.114298	0.982031	-4.55424
Rsad1	3.61058	1.56356	1.67671	0.114504	0.982031	-4.58584
Sergef	-3.62064	-0.680437	-1.67652	0.11454	0.982031	-4.58634
Dync1h1	-0.479865	8.97063	-1.67625	0.114595	0.982031	-4.37734
Pcmtd1	0.683502	7.55783	1.67597	0.11465	0.982031	-4.49067
Dbndd1	2.50536	-3.43808	1.67586	0.114671	0.982031	-4.56677
Zfx	-1.39246	6.79393	-1.6757	0.114703	0.982031	-4.52524
Pten	-0.402138	8.90192	-1.6757	0.114703	0.982031	-4.3847
Vps13a	-0.952203	5.61441	-1.6755	0.114745	0.982031	-4.55681
Ctnnd1	-0.9846	7.99964	-1.67478	0.114888	0.982031	-4.46331
Camkk2	1.68264	4.74561	1.67462	0.11492	0.982031	-4.57001
Gareml	3.97918	-2.27684	1.67432	0.114979	0.982031	-4.58026
Ccdc3	1.4277	-4.05422	1.67337	0.115168	0.982031	-4.55436
Prickle1	-3.02439	-1.2874	-1.6733	0.115181	0.982031	-4.5852
Micu1	3.25926	2.15294	1.67314	0.115214	0.982031	-4.58491
Suz12	-1.65412	5.23961	-1.67261	0.11532	0.982031	-4.56344
Vwa5a	-0.733869	6.75637	-1.67189	0.115464	0.982031	-4.52704
Fam168a	-0.619614	7.13661	-1.67128	0.115587	0.982031	-4.51219
Mvk	2.79221	-1.03279	1.6709	0.115661	0.982031	-4.58589
Sult2b1	1.40049	-4.05995	1.67064	0.115713	0.982031	-4.55445
Trpv2	1.83181	4.72121	1.67059	0.115724	0.982031	-4.57046
Tbl1x	-1.61143	5.34812	-1.66951	0.115941	0.982031	-4.56188
Isoc2b	-3.60049	-1.22436	-1.66819	0.116205	0.982031	-4.58546
Kdelr3	-2.60458	-2.77966	-1.66751	0.116342	0.982031	-4.57607
Glis2	1.37107	-4.06611	1.66743	0.116358	0.982031	-4.55456
D2hgdh	2.48743	3.62009	1.66659	0.116528	0.982031	-4.57971
Tex2	2.5562	3.8914	1.66604	0.116639	0.982031	-4.57804
Nt5dc2	-3.54747	-0.696647	-1.66596	0.116656	0.982031	-4.58648
Proz	-1.474	-3.43083	-1.66569	0.116709	0.982031	-4.56738
Gspt1	-0.838277	7.31637	-1.66459	0.116931	0.982031	-4.50503
C130030K03Rik	0.561688	-4.19511	1.66452	0.116945	0.982031	-4.55293
Rasl10a	0.561688	-4.19511	1.66452	0.116945	0.982031	-4.55293
Srrm3	0.561688	-4.19511	1.66452	0.116945	0.982031	-4.55293
Tbx2	0.561688	-4.19511	1.66452	0.116945	0.982031	-4.55293
Eno1b	-1.2761	6.11619	-1.66401	0.11705	0.982031	-4.54677
Cct8l1	2.70828	-3.50913	1.66399	0.117052	0.982031	-4.56607
Ctdspl	-3.75132	0.788727	-1.66311	0.117231	0.982031	-4.58673
Rsu1	-0.84009	6.52652	-1.66287	0.117279	0.982031	-4.53561
Mrpl22	3.36191	0.652969	1.66244	0.117366	0.982031	-4.58679
Dock2	-0.671653	8.26991	-1.66217	0.117422	0.982031	-4.44653
1110007C09Rik	-2.31796	2.93429	-1.66216	0.117425	0.982031	-4.58295
Apba1	-2.68212	4.0094	-1.66201	0.117454	0.982031	-4.57733
Inpp5a	3.27721	0.19815	1.66083	0.117694	0.982031	-4.5869
Btbd6	-1.90927	2.4035	-1.66064	0.117733	0.982031	-4.58456
Ophn1	-0.502512	8.07762	-1.65986	0.117891	0.982031	-4.46142
Lca5l	-2.99267	-1.40555	-1.65943	0.11798	0.982031	-4.58505
Pik3c3	-2.85963	3.9418	-1.65936	0.117994	0.982031	-4.57789
Smo	-1.64898	6.21824	-1.65933	0.118	0.982031	-4.54461
Nup107	-2.96837	0.207059	-1.65919	0.118029	0.982031	-4.58693
Ptpre	-1.07141	8.03232	-1.65918	0.118029	0.982031	-4.46475
Snrpb2	1.97972	3.93779	1.65869	0.118131	0.982031	-4.57794
Nup35	-3.66872	-0.305316	-1.65809	0.118252	0.982031	-4.58684
Cldn12	3.24668	0.0573841	1.65776	0.118319	0.982031	-4.58694
Hectd1	0.888228	7.54991	1.65741	0.118391	0.982031	-4.4945
Galk2	1.91783	3.56107	1.65619	0.118642	0.982031	-4.58031
Zfp945	-1.96856	2.5366	-1.65574	0.118734	0.982031	-4.58431
Bid	1.66777	5.02548	1.6553	0.118824	0.982031	-4.56739
Gabra1	2.00592	-3.78471	1.65468	0.11895	0.982031	-4.56088
Nod1	3.04865	1.96913	1.65458	0.118971	0.982031	-4.58558
Enpp4	-2.93355	3.17771	-1.65411	0.119067	0.982031	-4.58218
Spns3	2.89288	-1.59037	1.65387	0.119117	0.982031	-4.5845
1700052N19Rik	-3.36234	1.94194	-1.65362	0.119168	0.982031	-4.58564
Sp4	-1.16933	6.10253	-1.65351	0.119191	0.982031	-4.54798
Nrxn3	-2.77821	-2.1427	-1.65327	0.119241	0.982031	-4.58168
Plscr3	1.79405	4.91196	1.65309	0.119278	0.982031	-4.56895
Sh3gl1	-2.68971	5.10338	-1.653	0.119296	0.982031	-4.56645
Krtcap2	1.41312	4.43396	1.65271	0.119356	0.982031	-4.57413
6430550D23Rik	1.69956	-3.59205	1.65253	0.119393	0.982031	-4.56508
Tmem163	2.39715	-2.91451	1.65167	0.119569	0.982031	-4.57515
Fem1b	-1.08943	5.48572	-1.65149	0.119607	0.982031	-4.56064
Aim1	-2.91656	-1.97598	-1.65053	0.119805	0.982031	-4.58273
Rpsa	-1.03535	6.4431	-1.65045	0.119822	0.982031	-4.53934
Hspa9	0.651175	5.56158	1.65018	0.119876	0.982031	-4.5594
Supt5	1.05524	6.07884	1.64985	0.119946	0.982031	-4.54884
Ints7	3.31162	-0.549793	1.64985	0.119946	0.982031	-4.58682
Adcy2	-1.21089	-3.83427	-1.64972	0.119973	0.982031	-4.56003
Myh9	0.710263	7.47266	1.64969	0.119978	0.982031	-4.49987
Cnot4	-0.685854	7.10365	-1.64946	0.120025	0.982031	-4.51671
Ndufa12	3.19069	1.20532	1.6492	0.12008	0.982031	-4.58664
Tmem37	2.9226	4.22376	1.64887	0.120147	0.982031	-4.5761
Zfp157	1.75412	4.40902	1.64806	0.120315	0.982031	-4.57453
Lcn2	2.48531	-3.69433	1.6478	0.120371	0.982031	-4.56327
3830408C21Rik	2.59236	-1.55966	1.64722	0.12049	0.982031	-4.58474
Cabin1	-1.20118	5.88521	-1.64671	0.120596	0.982031	-4.55339
Atg7	-2.43608	3.55219	-1.64666	0.120607	0.982031	-4.5806
Itsn2	-0.653513	7.50259	-1.6464	0.12066	0.982031	-4.49894
Col1a2	1.22176	-4.09702	1.64634	0.120673	0.982031	-4.55548
Hmga2	1.22176	-4.09702	1.64634	0.120673	0.982031	-4.55548
Acaca	3.66091	1.2169	1.64559	0.120828	0.982031	-4.58668
F630028O10Rik	2.28144	-2.77477	1.6453	0.12089	0.982031	-4.57684
Cinp	3.33199	1.91687	1.64372	0.121219	0.982031	-4.58584
Gpatch8	1.41908	7.28809	1.64371	0.12122	0.982031	-4.50964
Dnlz	3.70489	1.33484	1.64331	0.121304	0.982031	-4.58661
Nop16	2.59316	2.77866	1.64174	0.121631	0.982031	-4.58388
Tjp2	-4.11097	1.3619	-1.64132	0.12172	0.982031	-4.58661
Nptn	-0.796	6.43381	-1.6407	0.12185	0.982031	-4.54057
Ptprm	-0.964312	6.46469	-1.64008	0.121979	0.982031	-4.53976
AU022793	-3.28587	0.955077	-1.6392	0.122164	0.982031	-4.58697
Tfrc	3.28274	0.587542	1.63914	0.122176	0.982031	-4.58715
Med26	-3.72704	1.19646	-1.63905	0.122195	0.982031	-4.5868
Catsperg1	2.82708	-1.43444	1.63829	0.122355	0.982031	-4.58533
Herc3	-3.49652	1.30409	-1.63828	0.122357	0.982031	-4.58671
Cd2bp2	-2.44213	4.18163	-1.6378	0.122459	0.982031	-4.5768
Psmb10	-1.64503	4.31695	-1.63751	0.12252	0.982031	-4.57571
Gcsh	3.54235	1.88147	1.63716	0.122594	0.982031	-4.586
Kctd20	2.36095	1.5911	1.63693	0.122642	0.982031	-4.58642
Acvrl1	2.9182	1.97924	1.63629	0.122777	0.982031	-4.58586
Rnf17	2.80043	-2.10622	1.6361	0.122816	0.982031	-4.5823
Zfp330	-2.68495	3.55648	-1.63555	0.122933	0.982031	-4.58086
Notch2	-0.702764	8.87075	-1.63539	0.122966	0.982031	-4.40369
Igf2r	2.39259	-3.74838	1.63514	0.12302	0.982031	-4.56284
Tmem219	2.03676	4.70796	1.63442	0.123171	0.982031	-4.57211
Acox1	1.81342	4.69484	1.63415	0.123228	0.982031	-4.57226
Lilrb4	-2.52893	0.748489	-1.63382	0.123298	0.982031	-4.58716
Lrrc14b	2.42093	-2.86366	1.63347	0.123373	0.982031	-4.57632
Mthfs	-3.02119	2.03386	-1.63281	0.123512	0.982031	-4.58582
Hic2	2.85368	1.23125	1.63263	0.12355	0.982031	-4.58686
Impdh1	2.04752	-3.15689	1.63233	0.123614	0.982031	-4.57295
4930528A17Rik	-1.05065	-3.90398	-1.63226	0.12363	0.982031	-4.55979
Myo18b	1.81401	5.90007	1.63201	0.123682	0.982031	-4.55417
Bola1	3.4361	-0.0268412	1.63201	0.123683	0.982031	-4.58729
Dgcr8	2.44094	1.81695	1.63169	0.123751	0.982031	-4.58619
Gpr19	-3.60636	-1.97915	-1.63114	0.123866	0.982031	-4.58313
Gm4285	-2.12528	-2.63266	-1.63083	0.123933	0.982031	-4.5786
Eif5a	-1.49905	5.54402	-1.63007	0.124094	0.982031	-4.56096
Smarcal1	2.81858	3.27397	1.62936	0.124247	0.982031	-4.58234
Sp110	-0.924521	6.50613	-1.62878	0.12437	0.982031	-4.53973
Bbs7	-2.99062	0.801259	-1.6275	0.124643	0.982031	-4.58723
U2af1	2.30001	2.92667	1.62713	0.124721	0.982031	-4.5837
Palb2	-3.55749	1.01356	-1.62703	0.124743	0.982031	-4.58711
Tnfrsf13b	-2.9046	-1.08159	-1.62681	0.124789	0.982031	-4.58647
Snx14	1.65662	5.30464	1.62662	0.12483	0.982031	-4.56495
Slc38a9	-1.46713	6.39137	-1.6257	0.125027	0.982031	-4.54318
Zcchc2	0.642034	6.80375	1.62455	0.125273	0.982031	-4.53104
Zfyve28	-2.07873	-2.93647	-1.62454	0.125277	0.982031	-4.57586
Abi3bp	-1.72388	-3.51718	-1.62428	0.125332	0.982031	-4.5679
Sema6b	-2.96748	-2.22896	-1.62374	0.125448	0.982031	-4.58183
Wbp1	2.71486	3.30539	1.62343	0.125514	0.982031	-4.58234
Gtf2e2	2.61879	1.23354	1.62322	0.125561	0.982031	-4.587
Mthfd1l	-3.98828	-1.23902	-1.62291	0.125627	0.982031	-4.58616
Trim14	2.13262	5.60391	1.62209	0.125804	0.982031	-4.56044
Phb	-1.44789	5.24598	-1.62201	0.125821	0.982031	-4.56605
Dda1	2.20707	3.96078	1.62154	0.125921	0.982031	-4.57888
Spef2	-1.55906	-3.46777	-1.62141	0.12595	0.982031	-4.56887
Malsu1	4.01725	0.813604	1.62128	0.125978	0.982031	-4.58731
Zkscan14	-3.61515	-0.5505	-1.6211	0.126017	0.982031	-4.58723
Pnkp	3.45335	1.6977	1.62099	0.12604	0.982031	-4.58653
Nat1	-1.94713	-2.67512	-1.62095	0.126048	0.982031	-4.57853
Dopey1	-1.50915	5.74948	-1.62072	0.126099	0.982031	-4.55793
Ppp2r5d	2.3463	2.51349	1.61926	0.126415	0.982031	-4.58505
Mllt6	-2.49535	4.31211	-1.61846	0.126587	0.982031	-4.5764
Nup37	1.94857	-1.87946	1.61808	0.126669	0.982031	-4.58391
Cdan1	1.75232	5.74532	1.61747	0.126802	0.982031	-4.55823
C330013E15Rik	3.08791	-2.39766	1.61745	0.126806	0.982031	-4.58084
Zfp219	3.61939	1.76361	1.61647	0.127019	0.982031	-4.58651
Gabbr1	1.04693	6.42995	1.61645	0.127022	0.982031	-4.54305
Grpel1	2.77882	1.99182	1.61435	0.127479	0.982031	-4.5862
Vapa	0.959628	6.16151	1.61416	0.12752	0.982031	-4.5499
Fgd3	-3.59862	1.92317	-1.61313	0.127745	0.982031	-4.58633
Tmem109	1.36532	4.11572	1.61193	0.128008	0.982031	-4.57811
Gabra4	1.02283	-4.148	1.61187	0.128021	0.982031	-4.55724
Mphosph6	-2.34338	0.868638	-1.61122	0.128163	0.982031	-4.58742
Ints8	2.24332	4.74536	1.61104	0.128203	0.982031	-4.57268
Ssrp1	-1.74808	4.30259	-1.61076	0.128265	0.982031	-4.57675
Impa2	1.37678	-3.8051	1.61064	0.128291	0.982031	-4.56306
Tspan1	1.59771	-3.49435	1.60994	0.128444	0.982031	-4.56899
Coro7	-1.08341	5.30308	-1.60992	0.128449	0.982031	-4.56589
A330040F15Rik	-2.41848	-2.10423	-1.60882	0.12869	0.982031	-4.58293
Usp29	1.31969	-3.82911	1.60881	0.128691	0.982031	-4.56266
Churc1	-3.48254	-0.50663	-1.60835	0.128792	0.982031	-4.58744
Dpp8	0.746236	6.70197	1.60801	0.128868	0.982031	-4.5362
Zfpl1	-2.52412	2.71966	-1.60777	0.12892	0.982031	-4.58472
Gm5420	-1.39682	-3.73876	-1.60709	0.12907	0.982031	-4.56466
Mbnl1	-0.331347	9.7103	-1.60618	0.12927	0.982031	-4.34207
Arvcf	-1.55109	5.4973	-1.60615	0.129276	0.982031	-4.56319
Trafd1	1.01599	7.36304	1.60571	0.129373	0.982031	-4.51238
Cd5l	3.31853	-1.29005	1.60563	0.129392	0.982031	-4.58631
Acsf3	3.46861	-0.847704	1.60508	0.129512	0.982031	-4.5872
4933421O10Rik	2.43342	2.99229	1.60462	0.129615	0.982031	-4.58395
Mrps28	3.87764	1.05341	1.60407	0.129736	0.982031	-4.58741
Gab1	-0.769633	6.33817	-1.60211	0.13017	0.982031	-4.54677
Adcy9	2.54942	4.25775	1.60186	0.130225	0.982031	-4.57739
Aak1	-0.825146	7.57585	-1.60123	0.130365	0.982031	-4.50341
Acly	1.45403	5.8676	1.60071	0.130482	0.982031	-4.55712
Zfp40	-1.83247	3.5299	-1.60028	0.130576	0.982031	-4.58188
2610528A11Rik	-3.89722	0.388841	-1.59937	0.130778	0.982031	-4.58775
Slc35b3	2.26284	1.29144	1.59895	0.130872	0.982031	-4.5873
Pfn1	-0.785753	8.29021	-1.59881	0.130903	0.982031	-4.46248
Ccnt2	-1.17108	5.11306	-1.59881	0.130904	0.982031	-4.56902
Ggn	-3.1472	-1.07961	-1.59835	0.131006	0.982031	-4.58691
Zc3h14	-1.51406	4.61197	-1.59812	0.131058	0.982031	-4.57452
Dlgap3	-2.80863	-2.58461	-1.59779	0.131131	0.982031	-4.57997
Ppm1a	2.52723	3.81877	1.59771	0.131149	0.982031	-4.58043
Rpa2	3.24625	-0.437305	1.59771	0.131149	0.982031	-4.58763
Fbxo44	1.77109	-3.16498	1.59762	0.131168	0.982031	-4.57423
Slc37a2	1.18551	5.62119	1.59759	0.131177	0.982031	-4.56172
Shmt1	2.36283	-2.86576	1.59739	0.131219	0.982031	-4.57751
Apbb1	-3.2627	-2.20702	-1.59734	0.131233	0.982031	-4.5826
Atpaf2	-3.66717	0.58017	-1.5972	0.131262	0.982031	-4.58774
Zfp622	-2.84616	1.9981	-1.59708	0.131291	0.982031	-4.58647
Dclre1b	2.31546	4.16059	1.59669	0.131377	0.982031	-4.57828
Nt5e	-2.36204	-2.59545	-1.59658	0.131401	0.982031	-4.57992
Snrpe	3.03818	2.3405	1.59642	0.131437	0.982031	-4.58585
Wdr6	-1.52038	2.49099	-1.59598	0.131536	0.982031	-4.58552
Kmt2d	-0.538812	9.4248	-1.59593	0.131548	0.982031	-4.37124
Rrp1	-1.74092	6.23025	-1.59515	0.13172	0.982031	-4.54996
Rps6	-0.947922	7.629	-1.59498	0.131759	0.982031	-4.50198
Fbxl3	-0.770939	7.55103	-1.59471	0.13182	0.982031	-4.50577
4933412E12Rik	3.42285	-0.16451	1.59397	0.131986	0.982031	-4.58778
Slc25a16	-2.54793	0.678745	-1.59346	0.1321	0.982031	-4.58776
Pa2g4	-2.17359	4.98158	-1.59284	0.13224	0.982031	-4.57089
Zfp677	-2.9697	2.38893	-1.59255	0.132306	0.982031	-4.58581
Ppp1r21	1.11923	7.34911	1.59229	0.132363	0.982031	-4.51513
Vcpip1	1.23355	6.75405	1.59139	0.132567	0.982031	-4.53652
2700029M09Rik	2.44655	3.11482	1.59128	0.132592	0.982031	-4.5838
Ttc27	3.77332	0.757994	1.5906	0.132744	0.982031	-4.58777
Crlf1	1.03252	-4.13192	1.5905	0.132766	0.982031	-4.55894
Gpr141	1.03252	-4.13192	1.5905	0.132766	0.982031	-4.55894
Gpr151	1.03252	-4.13192	1.5905	0.132766	0.982031	-4.55894
Ncoa7	-2.98394	0.0215103	-1.59023	0.132828	0.982031	-4.58787
2310045N01Rik	-3.05319	0.283066	-1.59016	0.132844	0.982031	-4.58788
Surf4	-1.30897	5.87131	-1.58988	0.132906	0.982031	-4.55783
Cep350	0.654454	7.89057	1.5896	0.13297	0.982031	-4.48944
4930470H14Rik	1.00982	-3.18492	1.58943	0.133007	0.982031	-4.57431
Acsl5	-1.06312	6.01424	-1.589	0.133106	0.982031	-4.55512
Ptpmt1	-2.41336	2.98298	-1.58828	0.133268	0.982031	-4.58432
Zfp691	1.91034	5.67283	1.58727	0.133496	0.982031	-4.56152
Ndufs8	1.40998	4.62108	1.58679	0.133605	0.982031	-4.57488
Supv3l1	3.08351	1.44554	1.58646	0.133681	0.982031	-4.58735
Pla2g4b	3.39928	-0.991603	1.5864	0.133695	0.982031	-4.58727
Acbd6	-3.00847	1.69432	-1.58626	0.133726	0.982031	-4.58707
9330182L06Rik	1.48998	-3.50014	1.58588	0.133812	0.982031	-4.57007
Tmem119	-0.385675	10.7397	-1.5858	0.133829	0.982031	-4.36308
Acox3	-0.90268	7.0626	-1.58562	0.133872	0.982031	-4.52715
Zc3h10	3.85937	0.870951	1.58519	0.133969	0.982031	-4.58779
Rad17	-2.53418	1.54102	-1.58507	0.133997	0.982031	-4.58727
Gtf2ird1	2.94735	2.16804	1.58496	0.134021	0.982031	-4.58638
Tnfrsf21	-0.67908	8.24107	-1.58491	0.134033	0.982031	-4.46951
Fbxo33	2.74774	3.64223	1.58436	0.134158	0.982031	-4.58174
Pkd2l2	2.60114	-1.71087	1.58371	0.134306	0.982031	-4.58533
Col6a3	2.71176	3.30682	1.58356	0.13434	0.982031	-4.58325
Slc24a1	2.28001	2.37817	1.58349	0.134355	0.982031	-4.586
Mrpl19	-2.93473	2.17104	-1.58339	0.134378	0.982031	-4.5864
A730017L22Rik	3.38061	-2.55789	1.5831	0.134444	0.982031	-4.58059
Ltc4s	-0.715623	7.27348	-1.58306	0.134453	0.982031	-4.51965
Dleu2	-2.6152	2.60931	-1.58303	0.13446	0.982031	-4.58548
Get4	2.91511	2.18024	1.58278	0.134517	0.982031	-4.5864
D730005E14Rik	3.15953	1.1521	1.5827	0.134535	0.982031	-4.58765
Acbd4	2.1183	-3.15395	1.58206	0.134683	0.982031	-4.57498
Tuba1c	-1.84889	2.91622	-1.5818	0.134741	0.982031	-4.58466
Hectd3	-1.88161	4.74515	-1.58132	0.134851	0.982031	-4.57392
Dimt1	-1.56908	3.57824	-1.5805	0.135039	0.982031	-4.58214
Adam1b	-1.37184	-3.92092	-1.58034	0.135075	0.982031	-4.56282
Sh3bp2	1.45182	5.53648	1.58009	0.135132	0.982031	-4.56416
Prkcsh	2.51283	4.11539	1.57979	0.135201	0.982031	-4.57912
Lypla2	-2.32252	1.66789	-1.57889	0.135408	0.982031	-4.58722
Tef	2.31565	3.76474	1.57844	0.13551	0.982031	-4.58126
Supt20	-1.06975	6.61008	-1.57839	0.135523	0.982031	-4.54209
Mrpl12	3.72208	-0.685014	1.57829	0.135546	0.982031	-4.58776
Prps2	-1.78859	4.93876	-1.57802	0.135607	0.982031	-4.57205
Hapln1	1.96745	-3.7139	1.57769	0.135683	0.982031	-4.56681
Fkbp3	1.37997	4.3017	1.5774	0.13575	0.982031	-4.57788
Trove2	1.95606	3.95979	1.57716	0.135804	0.982031	-4.58019
Rcor1	-2.60459	2.61589	-1.5767	0.13591	0.982031	-4.58558
4930563E22Rik	3.77063	-0.873536	1.57656	0.135944	0.982031	-4.58759
Cxx1b	-2.60104	-1.12838	-1.57624	0.136015	0.982031	-4.58716
Trpc2	2.6582	-3.06239	1.57577	0.136126	0.982031	-4.57625
Jade1	-1.81806	4.95037	-1.57542	0.136205	0.982031	-4.57204
Hormad1	2.37643	-3.612	1.57503	0.136295	0.982031	-4.56878
Galnt7	1.89451	3.97784	1.57495	0.136314	0.982031	-4.58015
Sec11c	-0.93447	5.99585	-1.5746	0.136394	0.982031	-4.5566
Wbp2	-1.17831	5.45003	-1.57387	0.136563	0.982031	-4.56582
Plekha3	-3.08841	1.87556	-1.57374	0.136593	0.982031	-4.58703
Trim7	-2.52421	-3.05891	-1.57255	0.136869	0.982031	-4.57641
Kif15	3.34153	-1.93968	1.57247	0.136887	0.982031	-4.58457
Fam185a	2.38228	2.90346	1.57234	0.136916	0.982031	-4.58489
Ednra	-1.82803	-3.71019	-1.57186	0.137028	0.982031	-4.56721
Alas1	1.63459	4.76116	1.57161	0.137087	0.982031	-4.57417
Slc29a1	-2.28461	4.8707	-1.57143	0.137128	0.982031	-4.57307
Atg101	3.76795	0.245965	1.57106	0.137213	0.982031	-4.58815
Irak2	1.51907	6.79093	1.57072	0.137292	0.982031	-4.53782
Chl1	-2.77067	-3.42418	-1.57042	0.137361	0.982031	-4.57195
6330549D23Rik	-1.48605	-2.47954	-1.57036	0.137375	0.982031	-4.58151
Exosc4	-2.67892	2.7501	-1.57	0.137459	0.982031	-4.58536
Apobr	2.93772	3.5722	1.5684	0.137831	0.982031	-4.58248
Cdk18	1.75128	-3.76863	1.5677	0.137996	0.982031	-4.56634
Aoc2	1.74755	-3.76957	1.56749	0.138043	0.982031	-4.56633
Daxx	2.42478	2.38889	1.56746	0.13805	0.982031	-4.58626
Cpn1	1.74379	-3.77053	1.56729	0.13809	0.982031	-4.56632
Caprin2	-3.37695	-1.39977	-1.56724	0.138102	0.982031	-4.58664
Orc5	-2.41123	1.93556	-1.56713	0.138127	0.982031	-4.58705
Prorsd1	2.95017	2.23718	1.56711	0.138133	0.982031	-4.58656
Tmem260	1.74764	5.09685	1.56652	0.13827	0.982031	-4.57081
Tmem176a	-1.55637	6.01689	-1.56585	0.138425	0.982031	-4.55687
Vill	-2.13476	-3.43931	-1.56504	0.138616	0.982031	-4.57198
Mcm7	2.87495	0.906433	1.56496	0.138636	0.982031	-4.58806
Arsk	1.86101	5.00703	1.56354	0.138967	0.982031	-4.57197
Rgs12	-3.70998	-1.52268	-1.56288	0.139123	0.982031	-4.58637
Usp21	-1.6295	5.05229	-1.56269	0.139167	0.982031	-4.5715
Mta2	2.56311	5.53064	1.56253	0.139204	0.982031	-4.56531
Yif1a	-2.60538	2.51688	-1.56181	0.139373	0.982031	-4.58608
Igf2bp3	3.30146	0.867144	1.56128	0.139499	0.982031	-4.58813
Rbm34	-2.84951	3.51695	-1.5611	0.139541	0.982031	-4.58291
Morf4l1	0.904242	6.48061	1.56077	0.139617	0.982031	-4.54724
Dap	-2.01184	3.51286	-1.56077	0.139617	0.982031	-4.58293
Ahcy	-1.42268	-3.65817	-1.56063	0.139652	0.982031	-4.56875
Tspan3	1.60904	5.41709	1.56004	0.139791	0.982031	-4.56708
Pura	1.42775	5.3017	1.55985	0.139836	0.982031	-4.56863
Nup98	1.38106	6.74231	1.55954	0.139907	0.982031	-4.54051
Ang	0.656024	6.95654	1.55937	0.139949	0.982031	-4.53415
Usp6nl	-2.17476	3.98297	-1.55929	0.139968	0.982031	-4.58058
Psmc4	-1.49132	4.83313	-1.55898	0.14004	0.982031	-4.57399
Ccdc22	2.03736	4.47012	1.55888	0.140063	0.982031	-4.57723
Pdf	-2.41113	2.61517	-1.55834	0.140192	0.982031	-4.58592
Luzp2	-0.688182	-4.03047	-1.55747	0.140397	0.982031	-4.56263
Ap3d1	0.63043	6.30507	1.55731	0.140436	0.982031	-4.55164
Gaa	0.938469	5.47646	1.55713	0.140478	0.982031	-4.56642
Echs1	-2.69986	1.95262	-1.55658	0.140608	0.982031	-4.58719
Wwox	-2.81455	-0.960076	-1.55597	0.140752	0.982031	-4.58777
Hes6	2.5149	1.9121	1.55562	0.140836	0.982031	-4.58726
Dnal4	3.36251	-0.281422	1.55545	0.140875	0.982031	-4.58828
Itgb2l	0.943878	-4.148	1.55515	0.140946	0.982031	-4.56124
Ifnar1	-1.23642	6.43804	-1.55489	0.141008	0.982031	-4.54883
Prkacb	0.711976	6.15853	1.55431	0.141146	0.982031	-4.555
Amd1	3.32497	-0.576408	1.55291	0.14148	0.982031	-4.58819
Pdcl3	-2.25376	3.25716	-1.5528	0.141505	0.982031	-4.58414
Xkr4	1.52318	-3.82681	1.55266	0.14154	0.982031	-4.5661
Anp32a	0.715809	5.96367	1.55263	0.141545	0.982031	-4.55888
Naaa	-2.75965	2.62846	-1.55262	0.141547	0.982031	-4.586
Rbm14	-1.9273	4.55166	-1.55257	0.141559	0.982031	-4.5768
Bptf	0.517864	8.19386	1.55251	0.141574	0.982031	-4.48087
Gm1720	0.902531	-4.16814	1.55203	0.14169	0.982031	-4.56127
Pigh	3.02469	2.80606	1.55193	0.141713	0.982031	-4.58557
Rasgrp4	2.79834	1.6558	1.55165	0.141779	0.982031	-4.58765
Tpk1	3.17912	-0.939481	1.55133	0.141855	0.982031	-4.58787
Chst15	-2.64403	2.93844	-1.55122	0.141882	0.982031	-4.58521
Rnf41	-1.97155	4.25995	-1.55056	0.14204	0.982031	-4.57908
Mobp	2.14217	-3.17018	1.55032	0.142096	0.982031	-4.57604
Kctd17	1.61402	-3.7415	1.54986	0.142207	0.982031	-4.56787
Gm4984	1.56419	-3.56882	1.54966	0.142254	0.982031	-4.57078
Rpp30	3.08873	1.17649	1.54946	0.142303	0.982031	-4.58811
Psmb2	2.07941	4.01736	1.5474	0.142796	0.982031	-4.58072
Megf8	2.58582	4.29151	1.54732	0.142815	0.982031	-4.57897
Rpl27	-0.832239	6.49015	-1.54709	0.142869	0.982031	-4.54836
Trappc11	-1.55114	5.73771	-1.54703	0.142885	0.982031	-4.56313
Dscc1	-2.51358	-1.83262	-1.54695	0.142903	0.982031	-4.58555
Sh2d7	-2.0343	-3.06766	-1.54635	0.143047	0.982031	-4.57729
Capn1	-1.70602	-3.12858	-1.54526	0.143311	0.982031	-4.57669
Mad2l1bp	2.98084	-1.76165	1.54519	0.143328	0.982031	-4.58587
Zc3h7b	2.55179	1.11323	1.54511	0.143346	0.982031	-4.58822
Zfp697	-1.13786	5.41955	-1.54484	0.143411	0.982031	-4.56791
Gm5512	2.71539	2.40656	1.54465	0.143458	0.982031	-4.58662
Wrn	-1.67207	5.54401	-1.54362	0.143705	0.982031	-4.56626
Cipc	2.33575	3.34078	1.54356	0.143719	0.982031	-4.58404
Fam69a	2.7308	1.72918	1.54354	0.143725	0.982031	-4.58769
Rab39	-1.16636	5.2788	-1.54328	0.143788	0.982031	-4.5698
Phf7	-3.56027	0.817979	-1.54315	0.143819	0.982031	-4.5884
Zadh2	3.55728	2.23991	1.5428	0.143904	0.982031	-4.58696
Tagap1	2.40413	3.53497	1.54272	0.143923	0.982031	-4.58328
Hist1h4n	1.11851	-3.99886	1.54197	0.144105	0.982031	-4.56411
4430402I18Rik	3.53277	-2.30881	1.54094	0.144354	0.982031	-4.58335
Mss51	1.64707	-3.45659	1.54091	0.144362	0.982031	-4.57286
Ppm1h	-1.1306	6.83737	-1.54064	0.144425	0.982031	-4.54002
Zfhx2os	-3.88023	-1.94625	-1.54059	0.144437	0.982031	-4.5852
Ift22	-3.22613	-0.700114	-1.54047	0.144468	0.982031	-4.58828
Zfp689	3.08095	-1.48735	1.54045	0.144471	0.982031	-4.58686
Pold1	2.86007	0.140623	1.54007	0.144564	0.982031	-4.58857
1700012D14Rik	1.74355	-2.52678	1.53969	0.144655	0.982031	-4.58202
Tex29	1.35603	-3.87106	1.5394	0.144728	0.982031	-4.56614
Pde7a	1.94363	3.80702	1.53936	0.144737	0.982031	-4.5821
Magee1	-2.74557	-1.80879	-1.539	0.144823	0.982031	-4.5858
Miat	2.02319	-3.29604	1.53897	0.144832	0.982031	-4.57503
Map3k10	3.19446	-0.776947	1.53849	0.144948	0.982031	-4.58825
Sult6b1	3.37143	-0.222246	1.53795	0.14508	0.982031	-4.58854
Procr	-2.92532	-2.01786	-1.53793	0.145083	0.982031	-4.58493
Gpt2	-3.13859	1.38763	-1.53767	0.145146	0.982031	-4.58812
0610010B08Rik	1.80352	5.24346	1.53756	0.145173	0.982031	-4.57053
Map3k8	2.64063	1.42096	1.53694	0.145325	0.982031	-4.5881
2810021J22Rik	2.63134	0.621421	1.53676	0.145369	0.982031	-4.58856
Lrrc16a	-2.98767	1.24275	-1.53672	0.145378	0.982031	-4.58825
Gpr82	-3.25032	-0.0703933	-1.5364	0.145457	0.982031	-4.5886
Gm10409	3.77288	2.10567	1.53638	0.145461	0.982031	-4.58729
Dnah2	-1.97446	-3.60414	-1.5362	0.145506	0.982031	-4.57092
Gm20199	-2.04729	4.61055	-1.53599	0.145555	0.982031	-4.57694
Slc40a1	0.761817	7.10119	1.53559	0.145655	0.982031	-4.53269
Rbbp4	-1.51731	5.12798	-1.53519	0.145752	0.982031	-4.57198
Snhg1	-3.58629	1.21498	-1.53485	0.145835	0.982031	-4.58829
Adar	-2.33263	3.21405	-1.5347	0.14587	0.982031	-4.58469
Cryba1	1.83385	-3.59039	1.53462	0.145891	0.982031	-4.57121
Bend4	-1.65595	-3.45955	-1.53443	0.145938	0.982031	-4.57312
Tmem86b	2.53225	1.00923	1.53439	0.145946	0.982031	-4.58843
Dnajc11	3.09374	2.77375	1.534	0.146042	0.982031	-4.586
Ccdc73	2.72279	-0.361169	1.53362	0.146135	0.982031	-4.58856
Asah1	0.366617	8.75249	1.53335	0.146202	0.982031	-4.45101
Hmox1	-2.61436	3.12539	-1.53277	0.146344	0.982031	-4.58502
Tbc1d31	-1.43184	5.6834	-1.53263	0.146378	0.982031	-4.56492
Agap1	-2.95196	2.22334	-1.53164	0.146621	0.982031	-4.58718
Tasp1	2.82667	0.186036	1.53141	0.146677	0.982031	-4.58869
Pex5	3.45693	1.5283	1.53114	0.146743	0.982031	-4.58809
Zfp580	-3.34632	-0.161062	-1.53062	0.146871	0.982031	-4.58866
Cdc73	2.08438	4.16733	1.53047	0.146907	0.982031	-4.58033
Icam2	0.960416	-3.96082	1.52946	0.147156	0.982031	-4.56547
2610008E11Rik	2.06937	4.4909	1.52925	0.147208	0.982031	-4.57814
Cnot11	2.74287	3.20949	1.5291	0.147245	0.982031	-4.58483
Fdxacb1	2.83509	-0.503728	1.529	0.14727	0.982031	-4.58856
Rsad2	-2.12311	-3.17843	-1.52736	0.147673	0.982031	-4.57685
Zfp715	0.537085	6.79445	1.52684	0.147803	0.982031	-4.54283
Ctbp2	1.32387	5.56324	1.52676	0.147821	0.982031	-4.56702
Spg20	1.40744	4.97872	1.52662	0.147857	0.982031	-4.57397
Pus10	1.66287	3.87948	1.52643	0.147903	0.982031	-4.58209
Kat6b	2.37002	4.27217	1.52634	0.147927	0.982031	-4.57979
Actr2	0.416631	8.57664	1.52566	0.148094	0.982031	-4.46512
Pum2	0.345549	8.28832	1.52547	0.148141	0.982031	-4.48249
Rpl13a	-0.652594	7.14134	-1.52491	0.14828	0.982031	-4.53287
Tgfb1i1	2.50463	-3.02227	1.52459	0.148358	0.982031	-4.57852
Zdhhc13	2.46916	4.0155	1.52442	0.148401	0.982031	-4.58141
Mtag2	-2.5338	-3.16849	-1.52413	0.148472	0.982031	-4.57708
Pcdh7	2.84007	-2.6981	1.52389	0.148532	0.982031	-4.58126
Yipf2	-3.88642	1.54418	-1.52378	0.14856	0.982031	-4.58818
1700066M21Rik	2.44136	0.707357	1.52364	0.148594	0.982031	-4.58871
Wdr83	2.87298	1.0287	1.52353	0.148621	0.982031	-4.58857
Abcd4	-3.50112	0.869247	-1.5235	0.14863	0.982031	-4.58865
Anks1b	-2.74767	-2.46547	-1.52326	0.148688	0.982031	-4.58286
Zxdb	2.25111	1.78502	1.52228	0.148932	0.982031	-4.58795
Gm13139	-2.04072	3.93199	-1.52214	0.148966	0.982031	-4.58193
Car7	-2.22199	-3.48456	-1.52211	0.148973	0.982031	-4.57336
Sharpin	1.26194	4.81223	1.52209	0.14898	0.982031	-4.57576
Fam20a	-1.1982	-3.80077	-1.52188	0.149031	0.982031	-4.5684
Tsg101	1.08515	4.54478	1.52149	0.149128	0.982031	-4.57802
Ctu1	-3.61705	-1.12748	-1.52144	0.149141	0.982031	-4.588
Abcc9	1.77187	-3.52672	1.52128	0.14918	0.982031	-4.57281
Ttll12	3.25488	0.310709	1.5209	0.149275	0.982031	-4.58883
Marveld1	-2.40024	-2.05332	-1.52089	0.149279	0.982031	-4.58513
3632454L22Rik	-2.05722	-2.97048	-1.52041	0.149397	0.982031	-4.57915
Olfr1033	-2.9246	-1.26357	-1.5199	0.149525	0.982031	-4.58775
Fam102b	-0.422408	9.20458	-1.51978	0.149554	0.982031	-4.42549
Plk3	-2.20013	3.89501	-1.51968	0.149579	0.982031	-4.5822
Grm3	2.733	-2.87725	1.51911	0.149721	0.982031	-4.58
Mrvi1	-2.40082	-2.92651	-1.51889	0.149778	0.982031	-4.57959
Nus1	2.03829	4.71618	1.51885	0.149787	0.982031	-4.57673
Hnrnpk	-0.485721	8.14744	-1.51855	0.149861	0.982031	-4.49197
Slc18b1	3.21338	2.42557	1.51853	0.149867	0.982031	-4.58704
Ssr2	1.88368	3.65525	1.51847	0.149881	0.982031	-4.58337
Dnajc16	-3.61064	2.20949	-1.51803	0.149992	0.982031	-4.58743
Gm2506	-1.8944	-2.78282	-1.51759	0.150103	0.982031	-4.58081
Prr13	-1.63977	5.16201	-1.51744	0.15014	0.982031	-4.57249
Crb2	-2.80011	-2.85497	-1.51736	0.150161	0.982031	-4.58024
Fkbp5	-1.77095	7.03413	-1.51726	0.150185	0.982031	-4.53723
Pan3	-0.428945	8.17522	-1.51694	0.150265	0.982031	-4.4909
Cstf2	2.44468	3.33813	1.51682	0.150294	0.982031	-4.58466
Slc35e1	-1.32899	5.50736	-1.5162	0.150451	0.982031	-4.56841
Casp8ap2	-0.995825	6.17314	-1.5161	0.150475	0.982031	-4.55789
BC029722	2.89857	0.305143	1.51525	0.150689	0.982031	-4.5889
Ghdc	-2.57795	-1.46157	-1.5151	0.150725	0.982031	-4.58736
Xlr3a	-1.79722	-3.34162	-1.51481	0.150799	0.982031	-4.57551
Aloxe3	2.93133	-2.45952	1.5148	0.150801	0.982031	-4.58312
Prkar2a	2.77208	1.85784	1.51436	0.150911	0.982031	-4.58798
Dtx1	1.47667	-3.68865	1.51379	0.151056	0.982031	-4.57076
Fkbpl	-2.28338	-3.52765	-1.51338	0.151159	0.982031	-4.57318
Yipf4	-2.4385	2.37483	-1.51337	0.151161	0.982031	-4.58723
Kdm4d	-0.797941	-3.97189	-1.51284	0.151296	0.982031	-4.56638
Zfp54	1.96837	-3.1577	1.51269	0.151333	0.982031	-4.57763
Rassf1	-3.85559	0.998991	-1.51248	0.151385	0.982031	-4.58874
Smyd3	2.42478	2.14969	1.51238	0.151411	0.982031	-4.58762
Hlcs	2.59956	0.684913	1.51221	0.151454	0.982031	-4.58888
Kif5a	3.35556	-0.915301	1.51199	0.151508	0.982031	-4.58848
Stim1	3.09811	2.09624	1.51181	0.151554	0.982031	-4.58771
Angptl3	-2.74395	0.0234439	-1.51178	0.151563	0.982031	-4.58894
Ctage5	1.02622	6.97587	1.51176	0.151566	0.982031	-4.53964
Rpl18a	-0.384595	9.00617	-1.51174	0.151572	0.982031	-4.44215
Ccdc90b	-2.93066	2.31302	-1.51164	0.151598	0.982031	-4.58736
Ddx5	0.356074	10.4749	1.51051	0.151884	0.982031	-4.40557
Neu3	2.23246	-2.73397	1.50996	0.152021	0.982031	-4.58141
Rad18	-3.09612	-1.92103	-1.50973	0.152081	0.982031	-4.58593
Slc9a6	2.64269	2.09525	1.50966	0.152097	0.982031	-4.58774
Atf1	-0.870723	7.3225	-1.50955	0.152126	0.982031	-4.52912
Gpx2-ps1	1.10829	-3.93841	1.5092	0.152215	0.982031	-4.56706
Sri	-2.17354	4.42379	-1.50888	0.152295	0.982031	-4.57936
Hk1	-3.3122	1.79055	-1.50863	0.15236	0.982031	-4.58815
Gm614	1.28589	-3.86615	1.50862	0.152361	0.982031	-4.56809
Zfp612	1.65127	-3.46259	1.50857	0.152375	0.982031	-4.57429
Rrp15	2.63582	-0.853009	1.50856	0.152376	0.982031	-4.5886
Dolpp1	-2.66703	2.18501	-1.50852	0.152386	0.982031	-4.58763
Gm15787	-2.02389	-2.64001	-1.50818	0.152473	0.982031	-4.58213
Orm2	1.16026	-3.39877	1.50816	0.152477	0.982031	-4.57511
Rnase6	-3.08821	-1.55813	-1.50808	0.152498	0.982031	-4.58722
Kif22	1.25567	-3.35123	1.50773	0.152587	0.982031	-4.57571
1110006O24Rik	2.43365	-0.952762	1.50749	0.152647	0.982031	-4.5885
Zfand5	-0.768927	6.47906	-1.50748	0.15265	0.982031	-4.5525
Zfp941	-1.74031	-3.67085	-1.5069	0.152799	0.982031	-4.57141
Abhd13	1.19304	5.53628	1.50578	0.153081	0.982031	-4.56864
Wdr3	2.1389	3.33067	1.50578	0.153083	0.982031	-4.58493
Selplg	-0.249382	11.3933	-1.50564	0.153117	0.982031	-4.64446
Tep1	-1.02019	5.90781	-1.50544	0.153169	0.982031	-4.56331
Gabbr2	-2.54036	-3.11013	-1.50531	0.153201	0.982031	-4.57839
Chst9	-2.57216	-2.51855	-1.5053	0.153205	0.982031	-4.58301
Slc7a4	0.861038	-3.90398	1.5051	0.153255	0.982031	-4.56779
Orai3	2.20259	4.35486	1.50505	0.153268	0.982031	-4.57996
Pisd-ps1	0.472486	8.28126	1.50421	0.153483	0.982031	-4.48854
A330076H08Rik	0.751283	-4.09702	1.50285	0.15383	0.982031	-4.56539
Sox15	0.751283	-4.09702	1.50285	0.15383	0.982031	-4.56539
Tmem136	0.751283	-4.09702	1.50285	0.15383	0.982031	-4.56539
4933402D24Rik	0.778647	-4.08811	1.50272	0.153863	0.982031	-4.56551
Adam30	0.778647	-4.08811	1.50272	0.153863	0.982031	-4.56551
Bcar3	0.778647	-4.08811	1.50272	0.153863	0.982031	-4.56551
Dmrtb1	0.778647	-4.08811	1.50272	0.153863	0.982031	-4.56551
Dner	0.778647	-4.08811	1.50272	0.153863	0.982031	-4.56551
Kcnh7	0.778647	-4.08811	1.50272	0.153863	0.982031	-4.56551
Mkln1os	0.778647	-4.08811	1.50272	0.153863	0.982031	-4.56551
Opn4	0.778647	-4.08811	1.50272	0.153863	0.982031	-4.56551
Cldn15	0.720671	-4.10706	1.50258	0.153899	0.982031	-4.56528
Csrp2	0.720671	-4.10706	1.50258	0.153899	0.982031	-4.56528
Gm14124	0.720671	-4.10706	1.50258	0.153899	0.982031	-4.56528
Pmel	0.720671	-4.10706	1.50258	0.153899	0.982031	-4.56528
Tex38	0.720671	-4.10706	1.50258	0.153899	0.982031	-4.56528
Gm3893	0.701365	-4.11351	1.50247	0.153928	0.982031	-4.56523
Cage1	1.37735	-3.54604	1.50245	0.153932	0.982031	-4.57346
Flt3	1.94983	-3.69978	1.50215	0.154008	0.982031	-4.57121
4931406B18Rik	0.803198	-4.08009	1.50214	0.154011	0.982031	-4.56566
Cd97	0.803198	-4.08009	1.50214	0.154011	0.982031	-4.56566
H2afy2	0.803198	-4.08009	1.50214	0.154011	0.982031	-4.56566
Map2k3os	0.803198	-4.08009	1.50214	0.154011	0.982031	-4.56566
Ppp1r14c	0.803198	-4.08009	1.50214	0.154011	0.982031	-4.56566
Tspo2	0.803198	-4.08009	1.50214	0.154011	0.982031	-4.56566
5031425E22Rik	-2.48403	2.89239	-1.50207	0.154028	0.982031	-4.58632
Cd28	0.686275	-4.11853	1.50199	0.154049	0.982031	-4.56521
Dmpk	0.686275	-4.11853	1.50199	0.154049	0.982031	-4.56521
Ehd2	0.686275	-4.11853	1.50199	0.154049	0.982031	-4.56521
Hipk4	0.686275	-4.11853	1.50199	0.154049	0.982031	-4.56521
1700084C01Rik	0.83383	-4.16814	1.50173	0.154116	0.982031	-4.56478
3300005D01Rik	0.83383	-4.16814	1.50173	0.154116	0.982031	-4.56478
Caskin2	0.83383	-4.16814	1.50173	0.154116	0.982031	-4.56478
Lonrf2	0.83383	-4.16814	1.50173	0.154116	0.982031	-4.56478
Mnda	0.680632	-4.1204	1.50172	0.154119	0.982031	-4.56521
1700020L24Rik	1.15758	-3.90148	1.5015	0.154174	0.982031	-4.56805
Ascl1	0.825454	-4.0728	1.5013	0.154225	0.982031	-4.56581
Efs	0.825454	-4.0728	1.5013	0.154225	0.982031	-4.56581
Gm9047	0.825454	-4.0728	1.5013	0.154225	0.982031	-4.56581
Mrpl44	2.61295	1.50024	1.50116	0.154262	0.982031	-4.58856
Gadd45a	-1.69026	-3.7225	-1.50101	0.1543	0.982031	-4.57091
Ppat	2.88326	1.40782	1.50091	0.154325	0.982031	-4.58864
Pdk2	3.15161	0.733808	1.5007	0.154378	0.982031	-4.58902
Klf7	-1.92723	3.45603	-1.50056	0.154415	0.982031	-4.58461
Rpia	2.96978	1.82923	1.50054	0.154421	0.982031	-4.58823
Cckbr	0.845803	-4.06611	1.50031	0.154479	0.982031	-4.56596
Morn4	0.845803	-4.06611	1.50031	0.154479	0.982031	-4.56596
A630033H20Rik	-1.66509	3.60015	-1.50029	0.154483	0.982031	-4.58406
Qars	1.2169	4.42914	1.4996	0.154661	0.982031	-4.57964
Cxcr3	0.864541	-4.05995	1.49924	0.154755	0.982031	-4.56611
Pir	0.864541	-4.05995	1.49924	0.154755	0.982031	-4.56611
Pcdhga9	-2.66699	1.6818	-1.49917	0.154771	0.982031	-4.58841
Apof	0.645706	-4.13192	1.49873	0.154884	0.982031	-4.5653
C630031E19Rik	0.645706	-4.13192	1.49873	0.154884	0.982031	-4.5653
Cacna1h	0.645706	-4.13192	1.49873	0.154884	0.982031	-4.5653
Car4	0.645706	-4.13192	1.49873	0.154884	0.982031	-4.5653
Cd5	0.645706	-4.13192	1.49873	0.154884	0.982031	-4.5653
Crybb3	0.645706	-4.13192	1.49873	0.154884	0.982031	-4.5653
D6Ertd527e	0.645706	-4.13192	1.49873	0.154884	0.982031	-4.5653
Map7d2	0.645706	-4.13192	1.49873	0.154884	0.982031	-4.5653
Myh11	0.645706	-4.13192	1.49873	0.154884	0.982031	-4.5653
Osmr	0.645706	-4.13192	1.49873	0.154884	0.982031	-4.5653
Sphkap	0.645706	-4.13192	1.49873	0.154884	0.982031	-4.5653
Gmppa	1.84072	3.99138	1.49859	0.15492	0.982031	-4.5823
Kcnc1	0.881904	-4.05422	1.49812	0.155042	0.982031	-4.56626
Mbd3l2	0.881904	-4.05422	1.49812	0.155042	0.982031	-4.56626
Pate2	0.881904	-4.05422	1.49812	0.155042	0.982031	-4.56626
Prph2	0.881904	-4.05422	1.49812	0.155042	0.982031	-4.56626
Tmem198	0.881904	-4.05422	1.49812	0.155042	0.982031	-4.56626
Phf1	1.83622	4.44177	1.49801	0.15507	0.982031	-4.57961
Fam102a	2.25539	1.8773	1.49795	0.155085	0.982031	-4.58822
Fam107b	1.49398	4.61943	1.49776	0.155135	0.982031	-4.57833
Fermt3	-0.804091	7.53364	-1.49751	0.155198	0.982031	-4.52358
Cenpn	-2.24994	-3.50113	-1.49737	0.155235	0.982031	-4.57431
Ciao1	-1.39532	5.03757	-1.4972	0.15528	0.982031	-4.57474
Slc39a6	2.49361	3.01767	1.49708	0.155311	0.982031	-4.58609
Tmem120b	-2.09126	-1.81899	-1.49706	0.155315	0.982031	-4.58658
Phf19	0.913207	-4.04386	1.49585	0.155626	0.982031	-4.56654
Zfp592	-0.951184	7.05738	-1.49572	0.155661	0.982031	-4.53939
Tm7sf3	1.15768	4.76874	1.49553	0.155708	0.982031	-4.57723
Gm15706	-2.03592	-3.00745	-1.49523	0.155786	0.982031	-4.5797
BC027231	-1.92919	3.35391	-1.49517	0.155801	0.982031	-4.5851
B630019K06Rik	0.927442	-4.03915	1.49475	0.155911	0.982031	-4.56667
Txlnb	0.927442	-4.03915	1.49475	0.155911	0.982031	-4.56667
Rac2	1.68463	5.72895	1.49456	0.155959	0.982031	-4.56673
Lmbr1l	-2.54295	0.77612	-1.49451	0.155972	0.982031	-4.58909
Prss8	-2.66049	-2.92343	-1.49429	0.15603	0.982031	-4.58044
Ndufaf1	-2.76732	-0.452936	-1.49422	0.156048	0.982031	-4.58906
Dab2ip	2.31301	-2.77607	1.4938	0.156155	0.982031	-4.5816
Cabp1	0.940878	-4.03469	1.49367	0.156189	0.982031	-4.56679
Eno4	0.940878	-4.03469	1.49367	0.156189	0.982031	-4.56679
Lcat	0.940878	-4.03469	1.49367	0.156189	0.982031	-4.56679
Masp1	0.940878	-4.03469	1.49367	0.156189	0.982031	-4.56679
Peg12	0.940878	-4.03469	1.49367	0.156189	0.982031	-4.56679
Zfp870	-2.7082	2.37609	-1.49318	0.156316	0.982031	-4.58757
Tecta	-1.59472	-3.82302	-1.49312	0.156331	0.982031	-4.5697
Zfp874b	2.0712	3.01245	1.49301	0.156361	0.982031	-4.58618
Akap5	-3.11646	0.945622	-1.49298	0.156368	0.982031	-4.58904
Adam33	0.953586	-4.03047	1.49262	0.156461	0.982031	-4.56691
Col6a1	0.953586	-4.03047	1.49262	0.156461	0.982031	-4.56691
Coq2	1.70736	4.43404	1.49243	0.156511	0.982031	-4.57986
Zfp526	3.04186	-0.206812	1.49226	0.156556	0.982031	-4.58917
Pgam5	3.92474	1.07771	1.4921	0.156597	0.982031	-4.58898
Taf1d	-1.12917	4.74571	-1.49192	0.156644	0.982031	-4.57757
Xpr1	-1.05454	7.37168	-1.49191	0.156645	0.982031	-4.53019
Fhl1	2.42492	-3.33935	1.49162	0.15672	0.982031	-4.57654
6430411K18Rik	0.965639	-4.02646	1.49159	0.156729	0.982031	-4.56703
Ak5	0.965639	-4.02646	1.49159	0.156729	0.982031	-4.56703
Ddx25	0.965639	-4.02646	1.49159	0.156729	0.982031	-4.56703
Esco2	0.965639	-4.02646	1.49159	0.156729	0.982031	-4.56703
Ldhc	0.965639	-4.02646	1.49159	0.156729	0.982031	-4.56703
Sgcz	0.965639	-4.02646	1.49159	0.156729	0.982031	-4.56703
Cndp2	1.31411	5.03638	1.49155	0.156739	0.982031	-4.57501
Mbnl2	0.640732	6.98539	1.49153	0.156745	0.982031	-4.54194
Spag1	-3.2995	-1.35932	-1.49137	0.156786	0.982031	-4.588
C330021F23Rik	-0.845635	-0.647651	-1.49119	0.156832	0.982031	-4.58901
Clcn4-2	0.885551	6.5096	1.49115	0.156843	0.982031	-4.55344
4930473A02Rik	-2.43236	-1.84697	-1.49114	0.156844	0.982031	-4.58659
Hars2	2.31913	3.43734	1.49097	0.15689	0.982031	-4.5849
Hist1h4j	-0.877874	-3.66034	-1.49083	0.156927	0.982031	-4.57242
Pdpn	0.977091	-4.02265	1.49057	0.156995	0.982031	-4.56714
1700034H15Rik	0.978317	-4.02224	1.49045	0.157023	0.982031	-4.56716
Trim72	1.11932	-3.87106	1.49002	0.157135	0.982031	-4.56915
Mrps11	-3.15339	0.254059	-1.48991	0.157166	0.982031	-4.58925
Gm5105	0.596464	-4.148	1.48978	0.157199	0.982031	-4.56576
Lrp8	0.596464	-4.148	1.48978	0.157199	0.982031	-4.56576
Mageb16	0.596464	-4.148	1.48978	0.157199	0.982031	-4.56576
Mfsd6l	0.596464	-4.148	1.48978	0.157199	0.982031	-4.56576
Nipal2	0.596464	-4.148	1.48978	0.157199	0.982031	-4.56576
Olig1	0.596464	-4.148	1.48978	0.157199	0.982031	-4.56576
Slc22a8	0.596464	-4.148	1.48978	0.157199	0.982031	-4.56576
Tekt3	0.596464	-4.148	1.48978	0.157199	0.982031	-4.56576
Tgfb2	0.596464	-4.148	1.48978	0.157199	0.982031	-4.56576
Fbxo48	2.58382	-2.83664	1.48964	0.157236	0.982031	-4.58128
E030011O05Rik	0.988009	-4.019	1.48957	0.157253	0.982031	-4.56725
Gm17745	0.988009	-4.019	1.48957	0.157253	0.982031	-4.56725
Gpatch4	3.19656	0.12354	1.48933	0.157317	0.982031	-4.58926
Wdr78	-3.07552	-2.21755	-1.48916	0.157361	0.982031	-4.58507
Sphk2	-1.6166	5.40554	-1.48901	0.1574	0.982031	-4.57123
Tmprss13	0.998439	-4.01552	1.48861	0.157504	0.982031	-4.56736
Adck3	-3.14626	-0.860468	-1.48813	0.157628	0.982031	-4.58888
Usp18	-2.79273	-1.66614	-1.48807	0.157643	0.982031	-4.58725
Gm8989	1.00621	-4.01293	1.48785	0.157701	0.982031	-4.56744
2610020C07Rik	2.57394	1.77943	1.48775	0.157728	0.982031	-4.58848
1500015O10Rik	1.00848	-4.01218	1.48763	0.157759	0.982031	-4.56746
Atp7b	1.00848	-4.01218	1.48763	0.157759	0.982031	-4.56746
Fgd5	1.00848	-4.01218	1.48763	0.157759	0.982031	-4.56746
Pla1a	1.00848	-4.01218	1.48763	0.157759	0.982031	-4.56746
Ank3	1.59939	-3.36004	1.48735	0.157831	0.982031	-4.57649
Pramef8	3.14598	2.33455	1.48717	0.157879	0.982031	-4.58774
B230216G23Rik	1.42359	-3.68492	1.48677	0.157983	0.982031	-4.57226
Pdgfrb	1.01811	-4.00897	1.48667	0.158009	0.982031	-4.56757
Zfp882	-1.76934	4.66167	-1.48576	0.158247	0.982031	-4.57847
Gm15910	1.02735	-4.00589	1.48574	0.158252	0.982031	-4.56767
Kcng2	1.02735	-4.00589	1.48574	0.158252	0.982031	-4.56767
Mcmdc2	1.02735	-4.00589	1.48574	0.158252	0.982031	-4.56767
Ahdc1	-2.51843	3.40896	-1.48548	0.15832	0.982031	-4.58513
Trim66	-2.68359	-3.25847	-1.48539	0.158346	0.982031	-4.57767
Snx7	2.2286	-1.7392	1.48531	0.158367	0.982031	-4.58708
Strn	-1.75917	4.59922	-1.48529	0.15837	0.982031	-4.57896
2310015A10Rik	1.32351	5.18894	1.48505	0.158434	0.982031	-4.57381
Pigf	3.42218	-1.83891	1.48443	0.158596	0.982031	-4.58675
Agtpbp1	2.1823	2.93325	1.48409	0.158684	0.982031	-4.58657
Btbd17	1.04481	-4.00006	1.48396	0.158719	0.982031	-4.56786
Cep55	1.04481	-4.00006	1.48396	0.158719	0.982031	-4.56786
Rdh9	1.04481	-4.00006	1.48396	0.158719	0.982031	-4.56786
Pdia5	2.71142	-0.149702	1.48394	0.158724	0.982031	-4.58929
G530011O06Rik	-1.02535	7.63968	-1.48364	0.158804	0.982031	-4.52208
Minpp1	-2.26756	3.85231	-1.48337	0.158874	0.982031	-4.58341
Gm12216	1.05308	-3.99729	1.48311	0.158943	0.982031	-4.56795
Itgax	-2.39566	-2.34326	-1.4831	0.158944	0.982031	-4.58458
Fam126a	2.06062	4.56576	1.48308	0.15895	0.982031	-4.57928
Tmem70	-2.53389	2.97213	-1.48296	0.158981	0.982031	-4.58649
Nemf	1.11886	5.89414	1.4829	0.158998	0.982031	-4.56513
Nfkbil1	2.6389	-1.55756	1.4829	0.158998	0.982031	-4.58766
Tmppe	3.12776	3.6287	1.48264	0.159065	0.982031	-4.58438
Nacad	1.39019	-3.92746	1.4816	0.159338	0.982031	-4.56893
[truncated: 20,431 more rows]

## Sheet: 16p11dup-THC vs WT-Veh
Supplementary Data 2: Differential expression gene list
16p11dup-THC vs WT-Veh
Gene name	logFC	AveExpr	t	two-tailed uncorrected P.Value	adj.P.Val	B
Mrpl20	-8.76402	1.67257	-7.17029	3.40486e-06	0.0763643	-3.98235
Agmo	2.71197	5.32496	5.72383	4.17568e-05	0.468261	-3.02835
Pdhx	-6.7444	1.98056	-5.39737	7.64907e-05	0.571844	-4.06112
Zfp644	2.03484	6.57848	5.04132	0.00015039	0.794521	-2.30913
D17Wsu92e	-4.30173	4.33846	-4.69545	0.000294374	0.794521	-3.69893
Gm14391	-5.84617	2.88521	-4.59205	0.000360784	0.794521	-4.03888
Med8	-5.85562	2.54324	-4.48632	0.000444722	0.794521	-4.09235
Pigs	-4.29146	3.205	-4.43212	0.000495272	0.794521	-4.01098
Fbxl5	-2.85736	4.32495	-4.41003	0.000517526	0.794521	-3.75778
Zbed5	-5.43308	-0.82247	-4.37359	0.000556502	0.794521	-4.17615
Fgfr1	5.64049	-2.37713	4.36812	0.000562605	0.794521	-3.86171
Klhl36	-6.27457	2.99808	-4.33521	0.000600817	0.794521	-4.05488
Aggf1	-2.65435	4.8399	-4.3238	0.000614674	0.794521	-3.59788
Rev3l	1.56622	5.83535	4.27519	0.000677476	0.794521	-3.14241
Nhsl2	-2.83443	5.6849	-4.2584	0.000700648	0.794521	-3.23027
Tnfsf13b	-5.37516	3.80894	-4.24067	0.000726012	0.794521	-3.92458
Daxx	6.61826	2.38889	4.23005	0.000741655	0.794521	-4.13648
Foxo4	-7.58174	0.541011	-4.20929	0.000773222	0.794521	-4.21959
Mphosph6	-6.09137	0.868638	-4.19951	0.000788569	0.794521	-4.21637
Fam102a	6.35655	1.8773	4.19596	0.000794208	0.794521	-4.17803
Tep1	-2.94511	5.90781	-4.18255	0.000815913	0.794521	-3.13918
Irf5	-1.37968	7.09995	-4.17387	0.000830277	0.794521	-2.37791
Zfp787	-6.91988	0.275469	-4.15605	0.000860598	0.794521	-4.22499
Zfp324	4.49095	3.19411	4.14348	0.000882649	0.794521	-4.05273
Tctn1	-6.53389	1.02355	-4.14181	0.000885635	0.794521	-4.21872
Cblb	-4.49389	4.72914	-4.06662	0.00103064	0.802959	-3.70312
Rbm43	-5.50042	3.57304	-4.05744	0.00104993	0.802959	-4.00298
Chd1	2.6885	6.54084	4.02517	0.0011207	0.802959	-2.84331
Pik3r6	-4.13024	3.71754	-3.95837	0.00128299	0.802959	-3.99275
Gnb2l1	-1.7194	7.43805	-3.90471	0.00143052	0.802959	-2.33859
Fzd5	-5.91269	0.912268	-3.90302	0.00143543	0.802959	-4.24525
Mrpl52	-2.15743	5.29972	-3.88354	0.00149334	0.802959	-3.54187
4933406I18Rik	-3.66184	2.42532	-3.8742	0.00152194	0.802959	-4.17658
2023-09-07	-1.89312	5.36976	-3.8718	0.00152939	0.802959	-3.51689
Tet3	-1.73382	7.48274	-3.8595	0.00156808	0.802959	-2.34536
Ly9	6.49526	1.0003	3.84689	0.00160878	0.802959	-4.24945
Ecsit	-5.86675	1.66042	-3.83848	0.00163654	0.802959	-4.22862
Arf2	-3.40949	4.47514	-3.81469	0.00171767	0.802959	-3.84447
Eif2ak4	3.77436	4.59026	3.78357	0.00182997	0.802959	-3.81938
Zbtb8os	-6.698	-0.698283	-3.77281	0.0018705	0.802959	-4.24567
Sart3	-4.68341	4.09555	-3.73138	0.00203519	0.802959	-3.95843
Map1b	-3.96512	1.09278	-3.71753	0.00209347	0.802959	-4.26132
Them6	3.96818	-2.92867	3.71361	0.00211025	0.802959	-3.80866
Srp14	-3.04187	4.94313	-3.69575	0.00218851	0.802959	-3.73366
Bscl2	-2.65255	5.53915	-3.68086	0.002256	0.802959	-3.51679
Fam161b	5.01324	-2.73941	3.64701	0.00241727	0.802959	-3.89285
Dolk	-5.79322	1.64397	-3.64275	0.00243836	0.802959	-4.25201
H2-Ob	-2.87213	5.2301	-3.63639	0.00247024	0.802959	-3.65302
Pak1ip1	4.44894	2.45581	3.63444	0.00248009	0.802959	-4.20563
Orc3	1.06078	8.17846	3.62566	0.00252491	0.802959	-2.12733
Svip	4.54608	-1.36214	3.61243	0.00259403	0.802959	-4.20812
Smox	-2.8197	6.21637	-3.60983	0.00260785	0.802959	-3.2446
Rnf123	-2.82833	5.0314	-3.59463	0.00269003	0.802959	-3.73584
Bub1b	6.21458	-1.05479	3.5785	0.00278011	0.802959	-4.24605
Ascc1	-4.65558	1.20931	-3.56773	0.00284194	0.802959	-4.27532
Slc17a5	4.37819	3.28517	3.563	0.00286957	0.802959	-4.13093
Aimp2	-5.80624	1.50316	-3.55526	0.00291525	0.802959	-4.26777
Slc35b3	5.03331	1.29144	3.5538	0.00292397	0.802959	-4.27466
Zcchc2	1.46503	6.80375	3.55183	0.00293575	0.802959	-2.98033
Neu1	-3.07719	4.57892	-3.55036	0.00294458	0.802959	-3.8837
Tada3	-4.96934	4.08767	-3.531	0.00306337	0.802959	-4.00388
Atp1a1	-3.64373	5.52966	-3.53032	0.00306764	0.802959	-3.5799
Dusp3	3.04932	4.97151	3.52866	0.00307807	0.802959	-3.77612
Mrps27	6.33226	-0.287695	3.52496	0.00310143	0.802959	-4.28485
Ranbp1	-4.28782	2.90183	-3.52254	0.00311676	0.802959	-4.18183
Vcan	4.53615	-2.08716	3.50869	0.00320624	0.802959	-4.09704
Ears2	-4.62761	-2.45704	-3.50642	0.00322111	0.802959	-4.00966
Sptbn2	6.20745	-1.09716	3.50155	0.00325338	0.802959	-4.25208
Ndufab1	-3.38041	2.79923	-3.50026	0.00326194	0.802959	-4.19522
Nck1	-5.68398	1.85204	-3.49384	0.00330498	0.802959	-4.261
Pcdhga12	-5.81884	1.35173	-3.48731	0.00334938	0.802959	-4.28075
Jarid2	-3.41234	4.69768	-3.47798	0.00341386	0.802959	-3.87169
Ppfia1	-2.72829	5.29814	-3.47622	0.0034262	0.802959	-3.68564
Lig3	-5.23149	3.22534	-3.46037	0.00353894	0.802959	-4.15588
Gpr137b	2.92125	4.84484	3.44397	0.00365955	0.802959	-3.84048
Hspa9	-1.40746	5.56158	-3.43716	0.00371086	0.802959	-3.60546
Tmem86b	-5.65466	1.00923	-3.43151	0.00375393	0.802959	-4.29557
Nrbp1	2.12912	6.19682	3.42636	0.00379363	0.802959	-3.35065
4930481A15Rik	5.23374	2.26876	3.42239	0.00382453	0.802959	-4.2476
Upf1	-2.86386	5.39848	-3.41452	0.0038866	0.802959	-3.67368
Tmem223	-4.55048	3.00153	-3.411	0.0039146	0.802959	-4.1892
Nup107	-6.05009	0.207059	-3.40933	0.00392801	0.802959	-4.30366
Ndufb4	-2.70615	3.92456	-3.40149	0.00399147	0.802959	-4.06349
Gm5431	5.22854	1.2691	3.39426	0.00405086	0.802959	-4.29413
Astn1	4.73813	-2.31539	3.35598	0.00438043	0.802959	-4.07763
Baz1a	1.98077	6.02953	3.35252	0.00441145	0.802959	-3.46032
Serpinf1	-2.29742	5.42571	-3.34556	0.00447466	0.802959	-3.69112
Pak2	-1.2985	7.21544	-3.3428	0.00449998	0.802959	-2.92085
2700097O09Rik	-5.79688	-0.314663	-3.33845	0.00454011	0.802959	-4.30611
Mrpl4	-4.8873	3.34696	-3.33417	0.00458004	0.802959	-4.16312
Sec24c	-1.93047	6.41699	-3.33413	0.00458034	0.802959	-3.30507
Cct3	-3.91468	3.70631	-3.33197	0.00460064	0.802959	-4.11403
Rrp15	5.72477	-0.853009	3.33116	0.00460821	0.802959	-4.29092
Oxct1	0.830825	6.92529	3.32331	0.00468272	0.802959	-3.07761
Rpusd3	5.40447	-0.711772	3.32314	0.00468437	0.802959	-4.29813
Strap	3.26917	4.5176	3.31426	0.00477014	0.802959	-3.96299
Neurl3	-2.72702	5.38098	-3.312	0.00479213	0.802959	-3.71936
2410089E03Rik	-2.91581	4.40444	-3.30077	0.00490337	0.802959	-3.9922
Usp16	-2.36866	5.51292	-3.29854	0.00492572	0.802959	-3.68005
Sufu	-5.63915	2.31564	-3.29714	0.0049398	0.802959	-4.26209
Ubap2l	1.36326	8.13728	3.29218	0.00499013	0.802959	-2.51298
Psenen	2.68766	6.38995	3.28813	0.00503158	0.802959	-3.344
Pln	5.79628	1.18359	3.27449	0.00517368	0.802959	-4.31073
Anp32a	-1.56652	5.96367	-3.26944	0.00522726	0.802959	-3.52817
Cox6c	5.23926	2.94886	3.26714	0.00525193	0.802959	-4.21784
Ap3s1	4.79906	1.15001	3.26516	0.00527314	0.802959	-4.31256
Fam134a	5.03596	3.01656	3.26243	0.00530266	0.802959	-4.21213
Abhd2	-4.58581	2.60264	-3.24818	0.00545909	0.802959	-4.24982
Nfam1	1.7072	7.78488	3.24223	0.0055258	0.802959	-2.73177
Zfp664	4.81703	4.4476	3.24188	0.00552981	0.802959	-3.99842
Dpcd	-5.07368	0.36099	-3.23667	0.00558889	0.802959	-4.32423
Nfkb2	5.45708	1.15521	3.23031	0.00566185	0.802959	-4.31672
Helz2	5.39392	-1.38935	3.224	0.00573528	0.802959	-4.26002
Zzz3	-1.04749	6.21918	-3.22316	0.00574505	0.802959	-3.45201
Uhmk1	-4.23942	3.48512	-3.22177	0.00576144	0.802959	-4.16676
Mgat5	-2.16628	5.31175	-3.22127	0.00576731	0.802959	-3.77671
Scamp5	-1.77929	7.02242	-3.21484	0.00584347	0.802959	-3.11239
Fam49b	0.795321	7.93517	3.21084	0.00589135	0.802959	-2.69365
Sys1	-5.09318	2.16309	-3.20639	0.0059451	0.802959	-4.28355
Abcf3	-3.80373	4.24496	-3.20507	0.00596112	0.802959	-4.04964
B3gat2	-4.81587	0.536058	-3.20186	0.00600016	0.802959	-4.32802
Rxfp4	-4.07429	-3.05698	-3.18997	0.00614752	0.802959	-3.91791
Atp8a1	0.84919	8.71664	3.18871	0.00616329	0.802959	-2.394
Psmd12	-3.21166	4.86764	-3.18808	0.00617118	0.802959	-3.91441
Dido1	1.31788	7.851	3.18735	0.00618044	0.802959	-2.75595
Galk2	3.77779	3.56107	3.18667	0.00618905	0.802959	-4.16375
Gna11	3.60847	3.51136	3.17928	0.00628291	0.802959	-4.17166
Zfp867	-5.54245	-0.676868	-3.17868	0.0062906	0.802959	-4.31735
Cnnm1	3.34578	-3.5454	3.17195	0.00637749	0.802959	-3.74197
Dera	-5.58344	0.52705	-3.16891	0.00641716	0.802959	-4.33201
9330151L19Rik	3.72475	3.83719	3.16747	0.0064361	0.802959	-4.12867
Hexb	0.621689	12.7952	3.16557	0.00646106	0.802959	-3.80489
Tango6	-6.30633	-0.38012	-3.15985	0.00653672	0.802959	-4.32661
Rbm48	4.30413	2.25372	3.15615	0.00658619	0.802959	-4.28582
Anxa7	3.45928	2.91957	3.15478	0.00660472	0.802959	-4.23906
Atg14	4.88832	2.3256	3.15308	0.00662762	0.802959	-4.28217
Nfib	3.12217	-2.94665	3.14723	0.00670701	0.802959	-3.96561
Ggn	-6.07617	-1.07961	-3.14579	0.00672675	0.802959	-4.3009
Acsf2	5.69711	1.98087	3.14175	0.00678241	0.802959	-4.30139
Zfyve20	6.03435	3.3725	3.14028	0.00680264	0.802959	-4.19592
Zmym1	3.35126	4.64112	3.13798	0.00683465	0.802959	-3.98469
Dph3	4.79366	2.85651	3.12189	0.00706232	0.802959	-4.2499
Hsp90ab1	-0.695732	8.92604	-3.11792	0.00711955	0.802959	-2.42049
Pcf11	1.31544	7.32688	3.11774	0.00712223	0.802959	-3.0547
Arpc4	-0.745583	7.7093	-3.11742	0.00712682	0.802959	-2.88807
Mef2c	0.827677	9.46538	3.11622	0.00714423	0.802959	-2.29963
Hs2st1	-3.61139	5.2327	-3.1162	0.00714464	0.802959	-3.84025
Ccndbp1	1.98112	5.66301	3.10487	0.00731132	0.802959	-3.71317
Pld1	1.1153	7.91261	3.10328	0.00733505	0.802959	-2.8151
Setdb1	1.79936	5.67301	3.10237	0.00734864	0.802959	-3.71104
Slc4a2	-4.83409	3.48975	-3.10135	0.00736378	0.802959	-4.18965
Wdr59	-5.96388	1.35905	-3.09788	0.00741607	0.802959	-4.3286
Cdan1	3.48434	5.74532	3.09725	0.00742561	0.802959	-3.68956
Taf5	-5.16886	1.91781	-3.09292	0.00749124	0.802959	-4.3108
Ece1	3.97221	4.02578	3.09198	0.00750567	0.802959	-4.11611
4930525G20Rik	-5.55161	-0.552852	-3.08918	0.00754842	0.802959	-4.33187
Uso1	2.61573	6.00631	3.08899	0.00755145	0.802959	-3.60417
Chpt1	4.97553	2.59215	3.08685	0.00758435	0.802959	-4.27532
Raver2	-6.61041	0.449723	-3.08365	0.00763383	0.802959	-4.34256
Exog	4.41608	2.33355	3.08205	0.00765883	0.802959	-4.29212
Zfp639	-4.12509	4.03228	-3.08191	0.00766103	0.802959	-4.11743
Pms2	-5.99167	1.6891	-3.07775	0.007726	0.802959	-4.32147
Cav2	3.55839	-2.90864	3.07631	0.00774871	0.802959	-3.99805
B4galt6	1.14487	6.835	3.07547	0.00776189	0.802959	-3.29558
Anks1	3.80272	5.08416	3.0666	0.00790327	0.802959	-3.89919
Zfyve16	2.36278	5.19033	3.06172	0.00798202	0.802959	-3.87251
G6pc3	3.08266	5.47058	3.05875	0.00803033	0.802959	-3.7934
Eml3	-3.48045	4.32736	-3.05538	0.00808555	0.802959	-4.07263
Scnm1	4.12288	2.94566	3.05181	0.00814446	0.802959	-4.25412
Deb1	4.77302	-0.261577	3.04862	0.00819741	0.802959	-4.34243
Cct7	-2.76024	5.51034	-3.04248	0.00830028	0.802959	-3.78834
Nr2c1	-4.55267	3.55021	-3.04201	0.00830823	0.802959	-4.19415
Slc35a4	-3.0828	5.49927	-3.03164	0.0084852	0.802959	-3.79627
Gm17644	-2.22095	-3.07792	-3.02543	0.00859283	0.802959	-3.96481
Galnt1	1.44846	7.71986	3.02467	0.00860616	0.802959	-2.97399
Zfp781	1.5842	5.01301	3.013	0.00881243	0.802959	-3.93634
Csf1r	0.502624	12.7849	2.99951	0.00905695	0.802959	-4.12322
Zfp937	-4.16844	1.56186	-2.99525	0.00913566	0.802959	-4.33646
Slc4a7	1.42522	6.49208	2.99123	0.00921046	0.802959	-3.48501
Cand1	-1.67367	6.02971	-2.99094	0.00921589	0.802959	-3.64752
Bloc1s4	-5.63271	1.15551	-2.98665	0.00929643	0.802959	-4.34727
Hbs1l	-2.99354	4.30672	-2.98634	0.00930227	0.802959	-4.09472
H2-DMb2	4.70869	-1.77642	2.98349	0.00935612	0.802959	-4.24838
Exosc7	4.47667	0.934622	2.98242	0.0093764	0.802959	-4.35135
Arglu1	0.780147	8.02657	2.97909	0.00943996	0.802959	-2.90114
Zfp330	-5.00555	3.55648	-2.9785	0.00945133	0.802959	-4.20634
Kmt2d	-1.08269	9.4248	-2.97434	0.00953128	0.802959	-2.52452
Rpl10	-0.747634	8.65847	-2.9705	0.00960576	0.802959	-2.69654
Pyroxd2	-2.50456	5.43308	-2.9641	0.00973121	0.802959	-3.84385
Agap2	-5.77131	-0.126502	-2.96346	0.00974388	0.802959	-4.35479
Tlr5	3.06016	4.66288	2.96218	0.00976912	0.802959	-4.03283
Gpr137b-ps	1.7619	5.18462	2.9618	0.00977673	0.802959	-3.91152
Hmbs	-4.67014	-0.318682	-2.96048	0.00980275	0.802959	-4.35268
Gadd45g	4.28768	-1.91233	2.95896	0.00983305	0.802959	-4.23342
Rab32	3.10742	4.42541	2.95328	0.00994681	0.802959	-4.08214
Daglb	1.55076	7.6384	2.95305	0.00995154	0.802959	-3.07535
Bivm	3.91075	3.1222	2.94914	0.0100307	0.802959	-4.25677
Scfd2	4.50337	1.00842	2.94533	0.0101083	0.802959	-4.35504
4930503L19Rik	5.04366	1.7002	2.94525	0.0101099	0.802959	-4.33895
2900008C10Rik	5.1613	-2.07845	2.94438	0.0101277	0.802959	-4.21069
Slc39a12	3.49321	2.38076	2.94004	0.0102172	0.802959	-4.31079
Sec11a	-3.13788	4.9145	-2.93921	0.0102343	0.802959	-3.98522
Faim2	3.04431	-3.71821	2.93847	0.0102497	0.802959	-3.77273
Erich1	-6.88489	0.523128	-2.93705	0.0102791	0.802959	-4.36051
BC005624	-3.00334	4.18849	-2.93342	0.010355	0.802959	-4.12862
Catsper2	-4.07513	-2.61158	-2.93198	0.0103851	0.802959	-4.11277
Gm10012	-2.7227	0.15668	-2.92106	0.0106171	0.802959	-4.36232
Rps23	-0.761681	8.26237	-2.91899	0.0106617	0.802959	-2.88493
Zfp119a	5.2546	-0.0881125	2.91714	0.0107017	0.802959	-4.36105
Acadm	-4.32801	4.67493	-2.91623	0.0107214	0.802959	-4.04447
Hsdl2	4.18996	2.11445	2.91512	0.0107454	0.802959	-4.32749
Wdr24	4.38878	1.63979	2.91457	0.0107575	0.802959	-4.34501
Usp46	4.71633	0.293459	2.90925	0.0108737	0.802959	-4.36417
Wdr3	4.21753	3.33067	2.90699	0.0109235	0.802959	-4.245
Acox1	3.32457	4.69484	2.89821	0.0111192	0.802959	-4.04601
Nhp2l1	2.92441	3.99113	2.89523	0.0111864	0.802959	-4.16821
C130050O18Rik	5.85085	1.40353	2.89078	0.0112873	0.802959	-4.35454
BC031181	2.45911	5.12935	2.89064	0.0112906	0.802959	-3.95193
Tnfaip1	-2.79247	5.06121	-2.89057	0.0112922	0.802959	-3.96821
Arsg	-3.67831	3.88246	-2.8874	0.0113646	0.802959	-4.18516
Mllt4	4.7675	0.442358	2.88515	0.0114164	0.802959	-4.36721
Gm8369	2.37	-3.03314	2.88465	0.011428	0.802959	-4.024
N4bp1	-2.12494	8.10911	-2.87926	0.0115529	0.802959	-2.98116
Ccdc71	-4.33796	3.36645	-2.87883	0.0115631	0.802959	-4.24691
Gtdc1	2.91001	4.86633	2.87192	0.0117255	0.802959	-4.0186
Ubb	-0.842428	8.42102	-2.87131	0.0117398	0.802959	-2.89136
Otub2	-4.17743	-2.014	-2.86972	0.0117777	0.802959	-4.236
Wwtr1	2.44303	-3.79006	2.85963	0.0120199	0.802959	-3.78141
Elf2	1.20222	6.82368	2.85827	0.0120529	0.802959	-3.45625
9930111J21Rik1	1.16541	7.82725	2.85697	0.0120844	0.802959	-3.10108
Plxnb2	-0.99018	9.06569	-2.85119	0.0122263	0.802959	-2.76155
Cpsf3	-2.28347	6.14577	-2.8509	0.0122333	0.802959	-3.68625
Elavl3	3.05858	-3.22769	2.83875	0.0125367	0.802959	-3.98509
Nr3c2	-2.48416	3.83854	-2.83844	0.0125445	0.802959	-4.20211
Gm13710	4.43859	-0.750127	2.83033	0.0127511	0.802959	-4.36068
Fam126a	4.05967	4.56576	2.82887	0.0127886	0.802959	-4.09216
Tatdn2	-2.73353	2.50176	-2.8279	0.0128136	0.802959	-4.32156
Tmem8c	-4.44324	0.758243	-2.82776	0.0128173	0.802959	-4.3729
Fbxw7	3.83044	3.52922	2.82764	0.0128204	0.802959	-4.24049
2023-03-08	-3.47235	3.97764	-2.82441	0.012904	0.802959	-4.18709
Zgrf1	6.22037	0.232541	2.82431	0.0129068	0.802959	-4.37476
0610031J06Rik	1.81696	6.49816	2.82362	0.0129247	0.802959	-3.58993
Gm14431	2.82839	2.98062	2.81595	0.0131258	0.802959	-4.2923
Gm8898	2.82839	2.98062	2.81595	0.0131258	0.802959	-4.2923
Ophn1	-0.899879	8.07762	-2.81571	0.013132	0.802959	-3.06158
Psen2	4.74601	-0.900469	2.81468	0.0131593	0.802959	-4.35711
A630007B06Rik	-2.23969	4.83084	-2.81069	0.0132654	0.802959	-4.04647
Kcnq1ot1	0.923359	8.29083	2.81046	0.0132715	0.802959	-3.00235
Clu	4.55541	-1.34512	2.80691	0.0133666	0.802959	-4.3287
Dnaja3	-4.15992	1.36928	-2.80629	0.0133834	0.802959	-4.36654
Mms19	-2.80995	5.16445	-2.80576	0.0133977	0.802959	-3.97554
Fcgr3	0.786989	9.35196	2.80348	0.0134592	0.802959	-2.79236
Gm16897	4.79747	1.01945	2.80346	0.0134597	0.802959	-4.37312
Gm4980	-2.31693	5.28567	-2.80204	0.0134982	0.802959	-3.94839
A730020M07Rik	-3.88281	-3.2477	-2.79985	0.0135578	0.802959	-3.99354
Gmip	1.47643	7.26286	2.79853	0.0135939	0.802959	-3.351
Fcf1	-1.97486	4.83244	-2.7878	0.0138904	0.802959	-4.05377
Ccdc166	-3.94883	-3.04389	-2.7876	0.0138959	0.802959	-4.0533
Clasrp	3.31431	2.87431	2.78349	0.0140111	0.802959	-4.30572
Cnep1r1	2.10051	5.87286	2.7823	0.0140445	0.802959	-3.80378
Paqr8	4.8721	-1.6392	2.77687	0.0141987	0.802959	-4.30278
Itga5	4.95398	2.05024	2.7738	0.0142864	0.802959	-4.3508
Tpt1	1.25898	8.10362	2.77311	0.0143061	0.802959	-3.10056
Cacng7	4.05353	-3.24543	2.77011	0.0143928	0.802959	-4.0052
Tmed4	-4.37074	3.85073	-2.76625	0.0145045	0.802959	-4.21721
Tspyl2	-4.21333	3.77869	-2.76441	0.0145583	0.802959	-4.22627
Tcaim	-5.09694	1.18355	-2.7613	0.0146494	0.802959	-4.37611
Hibch	5.68718	-0.590798	2.75944	0.0147043	0.802959	-4.37406
Usp1	4.06696	2.27161	2.75888	0.0147207	0.802959	-4.3438
Zdhhc21	-2.42383	4.53117	-2.75635	0.0147958	0.802959	-4.11993
Gm10509	5.26961	-0.337037	2.75555	0.0148193	0.802959	-4.37888
Afm	-5.59827	0.630182	-2.7467	0.0150846	0.802959	-4.38416
Ufm1	2.53721	4.41022	2.74221	0.0152213	0.802959	-4.14422
Ids	1.35959	7.97819	2.73773	0.0153583	0.802959	-3.17665
Abhd3	5.19165	-1.31124	2.73527	0.0154341	0.802959	-4.34298
Sf3a3	5.31917	3.13731	2.73367	0.0154839	0.802959	-4.2951
Ppt2	4.17845	2.31991	2.73359	0.0154864	0.802959	-4.34547
5430416N02Rik	-4.62104	-0.614044	-2.72807	0.0156585	0.802959	-4.37779
Wdr81	-2.17215	6.77283	-2.72497	0.0157558	0.802959	-3.56898
Card11	-4.08761	-1.19072	-2.72457	0.0157686	0.802959	-4.35328
Sfxn3	-4.53515	4.60851	-2.72349	0.0158027	0.802959	-4.1164
Sike1	1.61869	6.10931	2.72314	0.0158139	0.802959	-3.76857
Ppip5k2	1.50245	5.39433	2.72254	0.0158329	0.802959	-3.95502
Nrp2	-2.98891	5.86298	-2.72116	0.0158768	0.802959	-3.83745
Zxdb	4.04349	1.78502	2.72015	0.0159089	0.802959	-4.36761
Ift22	-5.60475	-0.700114	-2.71752	0.0159926	0.802959	-4.37734
Ube2e1	3.27033	2.34269	2.71556	0.0160554	0.802959	-4.34721
Znhit6	-5.04261	1.92403	-2.71358	0.0161193	0.802959	-4.36409
Ak1	-3.49431	4.06435	-2.71025	0.0162271	0.802959	-4.20347
Pkd2l2	4.28537	-1.71087	2.70887	0.0162717	0.802959	-4.3067
Ppp6c	2.9922	4.16609	2.70829	0.0162906	0.802959	-4.19013
Brpf3	-3.42969	4.69863	-2.70699	0.0163331	0.802959	-4.10557
Psmd6	-2.82138	4.22288	-2.70249	0.0164808	0.802959	-4.18362
M1ap	-2.40614	-2.30744	-2.69897	0.0165972	0.802959	-4.22829
Extl3	-1.33992	8.56137	-2.69846	0.0166141	0.802959	-3.06801
2610203C22Rik	2.52651	4.10178	2.69576	0.0167039	0.802959	-4.20217
Thra	-5.41061	-1.35997	-2.69165	0.0168417	0.802959	-4.34549
Ctsz	-0.831414	8.3423	-2.69095	0.0168653	0.802959	-3.1289
1700029I15Rik	2.81958	-3.46964	2.69064	0.0168757	0.802959	-3.97083
Commd6	-2.84863	4.34136	-2.68971	0.0169072	0.802959	-4.16971
Tlcd1	3.85194	-3.4038	2.6875	0.0169819	0.802959	-3.99172
Apobec3	-2.30552	7.14307	-2.68668	0.0170096	0.802959	-3.48293
Bola2	-4.96263	1.51538	-2.68615	0.0170278	0.802959	-4.37951
Zbtb6	-2.61561	4.59345	-2.68568	0.0170438	0.802959	-4.13058
Fam53a	-3.12846	3.08446	-2.67919	0.0172659	0.802959	-4.3093
Usp38	2.71841	5.04946	2.67702	0.0173411	0.802959	-4.04859
Eif4h	-1.60064	6.72585	-2.67687	0.0173463	0.802959	-3.61747
Cbll1	1.69491	5.38928	2.67565	0.0173885	0.802959	-3.97589
Mroh1	-1.79716	5.4768	-2.67382	0.0174521	0.802959	-3.9565
Mfsd12	-4.10971	-1.5089	-2.67147	0.0175343	0.802959	-4.33496
Cpsf4	-1.98179	4.22521	-2.6697	0.0175961	0.802959	-4.19201
Tmem164	3.13887	4.95689	2.66964	0.0175981	0.802959	-4.06965
Mrps21	-4.18261	2.68144	-2.66944	0.0176053	0.802959	-4.33727
Gtf2i	1.95373	6.84851	2.66666	0.0177031	0.802959	-3.58812
Malat1	0.208079	14.6633	2.66533	0.0177503	0.802959	-9.42742
Arvcf	-2.66596	5.4973	-2.66089	0.0179079	0.802959	-3.95737
C87436	3.9791	2.76235	2.66079	0.0179117	0.802959	-4.334
Snhg4	-6.08011	0.9862	-2.65973	0.0179495	0.802959	-4.39237
Ubqln2	-2.48916	3.84518	-2.65808	0.0180086	0.802959	-4.24301
Cass4	-3.89245	3.27096	-2.65487	0.0181242	0.802959	-4.2994
Nphp1	-4.51971	-1.74116	-2.64861	0.0183515	0.802959	-4.31435
Tefm	-5.54007	1.60828	-2.64657	0.0184262	0.802959	-4.38278
Fads6	3.69294	-3.35626	2.64597	0.0184484	0.802959	-4.0218
Fam3a	-3.52465	4.74076	-2.64239	0.0185802	0.802959	-4.11887
Anapc4	-3.16396	4.18163	-2.63957	0.018685	0.802959	-4.20597
Zfp467	1.54834	6.45609	2.63727	0.0187708	0.802959	-3.72207
Tnfsf13	-5.65905	-0.0730247	-2.63576	0.0188272	0.802959	-4.39742
Ssr3	1.49767	7.70954	2.63498	0.0188565	0.802959	-3.3602
Rnpc3	2.75199	4.84061	2.63498	0.0188566	0.802959	-4.10353
Rapgef5	1.44512	6.56627	2.63485	0.0188611	0.802959	-3.69263
Pdzk1	4.0865	-1.16205	2.62888	0.0190866	0.802959	-4.36954
Caprin1	1.10917	7.76331	2.6283	0.0191088	0.802959	-3.35172
Nupl1	-2.11889	5.39179	-2.62644	0.0191797	0.802959	-3.99605
Lrp5	-1.75509	6.31254	-2.62393	0.0192753	0.802959	-3.76988
Emr4	4.45583	-1.68597	2.62303	0.01931	0.802959	-4.32509
Sox4	-2.65765	4.19985	-2.62254	0.0193288	0.802959	-4.20802
Acot7	5.00401	-0.661343	2.62097	0.0193894	0.802959	-4.39132
Rab3ip	-2.39555	5.13173	-2.62068	0.0194003	0.802959	-4.053
Nme6	-4.48851	-1.42337	-2.62021	0.0194187	0.802959	-4.35136
1700009P17Rik	4.02821	-2.36395	2.61935	0.0194517	0.802959	-4.23852
Wdr18	-4.6321	0.975529	-2.61911	0.0194609	0.802959	-4.39786
Zfp661	5.41283	2.12464	2.61765	0.0195177	0.802959	-4.37116
Prkra	3.77799	2.18981	2.61628	0.0195708	0.802959	-4.36893
Sestd1	3.17795	-3.08134	2.61507	0.019618	0.802959	-4.10268
Son	0.653456	10.0783	2.61169	0.01975	0.802959	-3.11927
Sclt1	4.52648	1.86682	2.61019	0.0198092	0.802959	-4.38088
Isca1	-3.59542	4.28489	-2.60746	0.0199166	0.802959	-4.20053
Fhit	-4.70507	-1.20536	-2.60604	0.0199731	0.802959	-4.37027
Xpo5	-3.14474	3.57742	-2.59953	0.0202328	0.802959	-4.2838
Pear1	-6.36831	1.36513	-2.59785	0.0203002	0.802959	-4.39477
Trim39	3.59789	3.9618	2.5977	0.0203064	0.802959	-4.24403
Gpsm3	-3.02463	4.79742	-2.59518	0.020408	0.802959	-4.12455
Pcnxl4	4.81271	1.47816	2.59066	0.0205921	0.802959	-4.39349
Lypla2	-3.82561	1.66789	-2.59002	0.020618	0.802959	-4.38921
Cdkal1	3.56195	3.12033	2.58859	0.0206768	0.802959	-4.32356
Atp6v1g2	-5.44487	1.22627	-2.58854	0.0206787	0.802959	-4.39844
Ube2v1	-3.66839	5.04083	-2.58484	0.0208308	0.802959	-4.0841
Zfp708	4.49698	-1.05441	2.58355	0.0208843	0.802959	-4.38256
Tspan7	-2.71628	4.54931	-2.58303	0.020906	0.802959	-4.16896
Dcdc2c	-2.15666	-1.29731	-2.58233	0.020935	0.802959	-4.36793
Pbxip1	-1.67376	7.45877	-2.57795	0.0211174	0.802959	-3.48402
Clk4	1.60655	7.13487	2.57771	0.0211274	0.802959	-3.57407
Zfp953	3.67459	3.74059	2.57417	0.021276	0.802959	-4.27352
4933426M11Rik	2.28346	5.03785	2.57212	0.0213626	0.802959	-4.08933
Rpl3	-1.35919	8.33054	-2.57026	0.0214416	0.802959	-3.27372
LOC106740	4.87125	1.42963	2.567	0.0215802	0.802959	-4.39776
Asrgl1	-3.43519	-2.25852	-2.56679	0.0215891	0.802959	-4.26663
9330133O14Rik	-5.02814	1.42072	-2.56374	0.0217202	0.802959	-4.39838
Zyg11b	1.21096	7.57222	2.56343	0.0217331	0.802959	-3.46666
Actr1b	-1.99493	5.47361	-2.56336	0.0217362	0.802959	-4.0054
Cog2	-2.84447	3.23897	-2.56275	0.0217627	0.802959	-4.31983
Donson	3.92946	2.92635	2.55912	0.0219194	0.802959	-4.34182
Atg4c	3.63715	2.31549	2.55822	0.0219585	0.802959	-4.37292
Plau	-3.65887	3.78893	-2.55784	0.0219752	0.802959	-4.27233
Mkl1	-2.50084	4.89288	-2.55619	0.0220468	0.802959	-4.1212
Arhgap33	-3.57207	-2.5388	-2.55531	0.0220853	0.802959	-4.22687
Pank4	-4.11791	3.28495	-2.55387	0.0221483	0.802959	-4.3181
Pak4	5.51479	3.05546	2.55182	0.0222383	0.802959	-4.33491
Psmd2	-3.81772	3.63722	-2.55049	0.0222969	0.802959	-4.28885
Rnf141	-4.88655	-0.646925	-2.54753	0.0224277	0.802959	-4.40163
Ankmy2	-4.66375	2.52183	-2.54687	0.0224568	0.802959	-4.36573
Rfk	4.32884	2.2862	2.54595	0.0224977	0.802959	-4.37601
Xylb	4.23791	3.37063	2.54285	0.022636	0.802959	-4.31355
Tor1b	1.24459	6.2068	2.54261	0.0226465	0.802959	-3.84553
2023-03-02	-2.1067	3.11496	-2.53978	0.0227735	0.802959	-4.33311
Pcmt1	-4.43454	2.1935	-2.53943	0.0227894	0.802959	-4.38053
Cep250	-3.50765	4.91717	-2.53932	0.0227941	0.802959	-4.12284
Poldip3	2.18649	5.96052	2.53888	0.0228142	0.802959	-3.90728
Lmbrd1	1.27131	6.09671	2.53434	0.0230193	0.802959	-3.87722
Ankra2	-4.53729	1.8176	-2.53062	0.0231893	0.802959	-4.39382
Bbs4	-4.67223	-0.191822	-2.52726	0.0233434	0.802959	-4.41064
Sdcbp	0.931535	8.30963	2.52406	0.0234912	0.802959	-3.33195
Dffa	-5.0248	1.61351	-2.52309	0.0235363	0.802959	-4.39996
Impact	-1.92102	5.73247	-2.5221	0.0235821	0.802959	-3.96797
Sft2d3	-4.77974	1.97709	-2.52208	0.0235833	0.802959	-4.39041
Otulin	-4.05368	3.13538	-2.52184	0.0235941	0.802959	-4.3351
Bub3	4.23484	4.01792	2.51997	0.0236813	0.802959	-4.25679
Zfp597	-1.99908	4.23893	-2.51677	0.0238315	0.802959	-4.23126
AU022252	5.03899	-1.42474	2.51673	0.0238334	0.802959	-4.36828
Timm22	-5.57861	1.70565	-2.51672	0.0238339	0.802959	-4.39866
Gga1	-2.24912	4.04448	-2.51647	0.0238455	0.802959	-4.25466
Prss12	2.39627	-3.52258	2.51538	0.0238966	0.802959	-4.03042
Dusp7	-1.38862	7.27474	-2.51367	0.0239776	0.802959	-3.58967
Rhbdd1	3.40759	3.99616	2.513	0.0240092	0.802959	-4.26096
Smim13	3.81194	2.26243	2.51212	0.0240509	0.802959	-4.3822
Iffo1	-1.41718	7.32023	-2.51019	0.0241425	0.802959	-3.58088
Farsb	-2.54439	4.27547	-2.50798	0.0242475	0.802959	-4.22903
Klhl24	1.37068	6.99317	2.50585	0.0243498	0.802959	-3.66912
Ankrd53	3.07235	-3.33907	2.50578	0.0243527	0.802959	-4.08167
Vwa8	1.76015	4.6383	2.50508	0.0243866	0.802959	-4.17946
Apopt1	3.72693	2.61311	2.50429	0.0244243	0.802959	-4.36843
L1cam	1.71112	-3.91015	2.50207	0.0245317	0.802959	-3.92536
Pars2	-4.84984	0.236884	-2.50192	0.0245387	0.802959	-4.4164
Mapkapk2	1.84621	5.43839	2.50086	0.0245901	0.802959	-4.03985
Cpd	2.65759	4.80263	2.49944	0.0246587	0.802959	-4.15569
Pelp1	-4.53875	2.3559	-2.49738	0.0247589	0.802959	-4.38086
Fam168b	-1.25978	7.56467	-2.49443	0.024903	0.802959	-3.53319
Phf20	2.24815	4.85927	2.49264	0.024991	0.802959	-4.1488
Ptgfrn	-3.27682	3.18767	-2.49141	0.0250515	0.802959	-4.33731
Prdx1	-2.24913	5.55654	-2.49114	0.0250647	0.802959	-4.02005
Zfp59	-5.1459	2.37773	-2.4906	0.0250912	0.802959	-4.38106
Ndufa7	3.7285	2.50909	2.48762	0.0252389	0.802959	-4.37599
Rnf144b	-4.3245	3.70018	-2.48713	0.025263	0.802959	-4.29709
Ccdc51	4.5757	-1.73969	2.48493	0.0253726	0.802959	-4.34507
Parp3	-3.93364	2.13324	-2.48426	0.0254062	0.802959	-4.39105
Gm20199	-3.42006	4.61055	-2.48356	0.025441	0.802959	-4.19031
Cep128	5.21017	0.554531	2.48183	0.0255276	0.802959	-4.41893
Rnf166	1.7044	6.40934	2.48164	0.0255371	0.802959	-3.83275
Prkab1	-1.65076	6.07866	-2.48011	0.0256139	0.802959	-3.91164
Aldh1l2	-4.85771	-1.52886	-2.47523	0.0258608	0.802959	-4.36661
Map7	4.34394	1.17961	2.47499	0.0258728	0.802959	-4.41448
Hjurp	-3.18328	3.66959	-2.47109	0.0260717	0.802959	-4.30346
Psmb4	-1.69764	5.11538	-2.47023	0.0261158	0.802959	-4.11327
B3galt5	4.61537	3.49857	2.46853	0.026203	0.802959	-4.31862
Exoc6b	-1.55098	5.77738	-2.468	0.0262305	0.802959	-3.98466
Pih1d2	2.06385	-3.80635	2.46703	0.0262803	0.802959	-3.972
B3gntl1	4.35322	2.36424	2.46653	0.0263065	0.802959	-4.38542
Gucd1	-3.4921	2.11338	-2.4664	0.0263129	0.802959	-4.39442
Pnkd	5.21625	1.31269	2.46485	0.0263928	0.802959	-4.41383
Fam57a	3.01073	-3.03504	2.46424	0.0264246	0.802959	-4.16417
Slc25a46	3.1358	4.62436	2.4634	0.0264685	0.802959	-4.1946
St5	3.3094	4.63199	2.46296	0.0264911	0.802959	-4.19363
Fam49a	2.4809	4.65478	2.46096	0.026595	0.802959	-4.19093
Copa	0.919859	7.21788	2.4603	0.0266296	0.802959	-3.64896
Evl	-1.11185	6.76055	-2.45791	0.0267548	0.802959	-3.76322
Tubb5	0.982287	7.29246	2.45739	0.0267819	0.802959	-3.63319
Rbm14	-3.14894	4.55166	-2.4562	0.0268448	0.802959	-4.20715
Tmem50a	-1.45506	6.99892	-2.45448	0.0269355	0.802959	-3.70742
Arhgap26	2.95068	0.573509	2.45227	0.0270523	0.802959	-4.42274
Mmadhc	-4.20156	3.72396	-2.45121	0.0271086	0.802959	-4.30302
Dnajc9	4.50044	3.59026	2.44915	0.0272181	0.802959	-4.31516
Pvt1	4.41277	2.52456	2.44824	0.0272663	0.802959	-4.38175
2310039H08Rik	-5.66319	0.160196	-2.44769	0.0272961	0.802959	-4.42334
Uap1l1	-4.23257	4.2318	-2.44698	0.0273337	0.802959	-4.25101
Ddhd1	3.03823	4.08276	2.44691	0.0273376	0.802959	-4.26808
Myo6	2.91187	1.88568	2.44639	0.0273654	0.802959	-4.4042
Lgals8	-1.49361	6.65815	-2.44592	0.0273908	0.802959	-3.79635
Dbf4	-4.4863	-0.65633	-2.44369	0.0275106	0.802959	-4.41572
3110001I22Rik	-5.40833	0.458028	-2.44053	0.0276814	0.802959	-4.42452
Stom	-4.59596	-1.49953	-2.43983	0.0277194	0.802959	-4.37511
Mrps18a	-4.23029	1.23505	-2.43763	0.0278386	0.802959	-4.41874
AB124611	3.46977	-2.01464	2.43735	0.0278539	0.802959	-4.32579
0610009L18Rik	2.66631	-2.43329	2.43703	0.0278715	0.802959	-4.2736
Pfkl	-3.17096	4.57212	-2.43578	0.0279399	0.802959	-4.21056
Golph3	-2.93441	4.73295	-2.43373	0.0280522	0.802959	-4.1882
Ptprm	-1.48978	6.46469	-2.43254	0.0281173	0.802959	-3.85079
Bag6	-1.58491	5.92738	-2.43062	0.0282232	0.802959	-3.97172
6330403A02Rik	1.93688	-3.85123	2.43047	0.0282317	0.802959	-3.97838
Ctnna1	2.37001	4.96802	2.42933	0.0282942	0.802959	-4.1533
Abcc4	3.80108	1.05983	2.4268	0.0284347	0.802959	-4.42248
Psmd7	-2.79414	4.01157	-2.42634	0.0284602	0.802959	-4.28089
Arhgap35	3.60842	4.44393	2.42544	0.0285102	0.802959	-4.23078
Emp3	-4.73017	1.27322	-2.42452	0.0285619	0.802959	-4.41996
Rfxank	-4.04124	-0.413622	-2.42397	0.0285925	0.802959	-4.42205
Slc24a2	3.64644	-1.50149	2.4229	0.0286523	0.802959	-4.37784
St3gal5	-1.61149	6.76842	-2.41745	0.0289588	0.802959	-3.79018
Zfp518b	4.35595	2.07299	2.417	0.0289843	0.802959	-4.40318
Kctd21	3.81981	2.69293	2.41677	0.0289973	0.802959	-4.37938
D330023K18Rik	-4.06468	-1.49707	-2.41591	0.0290463	0.802959	-4.37938
Phyh	4.3667	2.51644	2.41524	0.0290844	0.802959	-4.38751
Gm2518	-4.8665	-0.465706	-2.40988	0.0293899	0.802959	-4.4233
0610007P14Rik	-4.75473	1.57536	-2.40883	0.0294504	0.802959	-4.41686
Ddx10	-3.97247	3.20657	-2.40718	0.0295451	0.802959	-4.35233
Kdm7a	1.17219	7.24579	2.40587	0.0296206	0.802959	-3.68785
Ttll4	-3.45015	2.62244	-2.40584	0.0296228	0.802959	-4.38448
Reep4	4.14637	0.853423	2.40465	0.0296916	0.802959	-4.42741
Myh14	3.05978	-3.31043	2.40055	0.0299298	0.802959	-4.12955
Rapgef6	1.37196	7.37256	2.39965	0.0299822	0.802959	-3.66427
Dusp6	0.843039	8.28991	2.39658	0.0301624	0.802959	-3.48259
Ccr1	-5.32769	-0.369863	-2.39619	0.0301853	0.802959	-4.42631
Rnf219	-5.03578	2.36177	-2.39582	0.030207	0.802959	-4.39675
Hadhb	-2.8896	4.1856	-2.3953	0.0302372	0.802959	-4.27018
2010015L04Rik	1.74787	5.42201	2.39312	0.0303663	0.802959	-4.08936
Inpp4a	2.75645	5.40036	2.3918	0.0304445	0.802959	-4.09384
Ybx1	-1.46295	6.33871	-2.39131	0.0304737	0.802959	-3.90496
Phf1	3.02419	4.44177	2.39077	0.0305053	0.802959	-4.2412
Fancf	4.75427	-0.77854	2.38743	0.0307045	0.802959	-4.42101
Spp1	-3.07678	-3.26541	-2.38637	0.030768	0.802959	-4.1447
Aptx	3.97484	3.3548	2.385	0.0308499	0.802959	-4.34672
Slc35a2	3.57036	1.7011	2.38412	0.0309032	0.802959	-4.41771
Ranbp10	-1.78706	5.61869	-2.38387	0.0309177	0.802959	-4.0569
Csnk1d	1.57285	6.60511	2.38357	0.0309358	0.802959	-3.85096
Snx30	1.60895	6.14276	2.3824	0.0310063	0.802959	-3.95232
Zfp106	-0.610475	7.66458	-2.38159	0.0310554	0.802959	-3.61704
U2af1	3.4237	2.92667	2.38144	0.0310646	0.802959	-4.37375
Serinc5	4.39051	-0.433338	2.38099	0.031092	0.802959	-4.42762
BC028528	2.59827	1.16872	2.38046	0.0311238	0.802959	-4.42742
Ugt1a6a	4.93781	-0.628197	2.37994	0.0311552	0.802959	-4.42497
Etfa	-2.95755	3.4968	-2.37958	0.0311771	0.802959	-4.33756
Golga7	1.91337	5.22077	2.37956	0.0311782	0.802959	-4.13025
Zfp414	3.68294	3.72899	2.37518	0.0314453	0.802959	-4.31984
Zbtb49	-4.20059	0.199413	-2.37137	0.0316785	0.802959	-4.43346
Thoc6	-3.82953	-1.18013	-2.37125	0.0316862	0.802959	-4.40766
Tspan33	-4.43931	1.33276	-2.3709	0.031708	0.802959	-4.42641
Esyt3	-3.22948	-2.64197	-2.37087	0.0317094	0.802959	-4.26103
Ntmt1	-4.32964	-0.693183	-2.37031	0.0317439	0.802959	-4.42522
Efcab4b	3.39771	-2.48846	2.37022	0.0317498	0.802959	-4.28313
Syvn1	-2.44315	5.30734	-2.36993	0.0317674	0.802959	-4.11937
4930453N24Rik	-4.36203	3.27369	-2.36729	0.0319308	0.802959	-4.3558
Mdga1	-4.02326	-2.42049	-2.36612	0.0320033	0.802959	-4.2933
Mlxip	-0.913271	7.98465	-2.36429	0.0321177	0.802959	-3.57121
Usp8	1.05806	8.0974	2.36229	0.0322428	0.802959	-3.55323
Fam21	-1.19996	6.24604	-2.361	0.0323234	0.802959	-3.94298
Glod4	-2.90721	4.74607	-2.36	0.0323863	0.802959	-4.21049
Tnrc6b	0.62527	8.50171	2.35926	0.0324326	0.802959	-3.49566
Synj1	-0.803809	7.4799	-2.35919	0.0324368	0.802959	-3.67673
Csf2rb	-1.3436	7.39356	-2.35822	0.0324981	0.802959	-3.69593
Naa16	2.62841	4.7993	2.35714	0.0325665	0.802959	-4.20395
Gm3604	3.68671	2.07761	2.35682	0.0325868	0.802959	-4.41214
Pin1	-4.73666	-0.0103591	-2.35663	0.0325985	0.802959	-4.43457
Slu7	2.45247	4.7791	2.35459	0.0327282	0.802959	-4.20765
Hist1h4h	-3.93165	-2.74341	-2.35321	0.0328159	0.802959	-4.25071
Abca9	0.43382	9.72169	2.35258	0.0328557	0.802959	-3.48521
Btbd6	2.73359	2.4035	2.35043	0.0329933	0.802959	-4.40248
Zc3h12a	-4.5148	-0.166861	-2.34648	0.0332469	0.802959	-4.43488
Gpatch3	-4.21361	-0.457063	-2.34596	0.0332798	0.802959	-4.43208
Adra2a	-3.65624	-3.10666	-2.3452	0.0333292	0.802959	-4.19135
Tnip1	-4.73809	-0.216252	-2.34439	0.0333816	0.802959	-4.43477
Sf3b2	2.11349	5.73557	2.34355	0.0334362	0.802959	-4.05395
Ang	1.02902	6.95654	2.34115	0.0335919	0.802959	-3.80405
Thap1	4.46098	-0.155797	2.34096	0.0336038	0.802959	-4.4357
Pex26	-4.62092	-0.37029	-2.33915	0.0337219	0.802959	-4.43399
Eef2	-0.693812	8.51653	-2.33891	0.0337378	0.802959	-3.51835
Pcolce	-3.18768	-2.52681	-2.33891	0.0337379	0.802959	-4.28614
Stx12	-2.42776	4.4294	-2.33511	0.033987	0.802959	-4.25896
Ptbp3	0.748284	8.48598	2.33368	0.0340809	0.802959	-3.52826
Efcab4a	3.30655	2.94256	2.33167	0.0342136	0.802959	-4.38191
Ctsd	0.559706	12.6454	2.33165	0.034215	0.802959	-5.21878
Xpot	1.30975	6.12619	2.33127	0.0342404	0.802959	-3.98462
Bai1	5.70827	-0.940626	2.33091	0.0342642	0.802959	-4.42412
Lyve1	3.49099	-3.25513	2.33085	0.0342681	0.802959	-4.16787
Prkci	3.21275	3.51565	2.32916	0.0343804	0.802959	-4.34685
Fam98b	2.16918	3.85386	2.32844	0.0344283	0.802959	-4.31987
Slc35e3	-3.56604	3.78521	-2.32762	0.0344832	0.802959	-4.32597
Irf2bpl	3.48434	3.85206	2.32492	0.0346638	0.802959	-4.32086
AA465934	-2.73841	-1.18522	-2.32462	0.0346833	0.802959	-4.41455
Skil	0.746533	8.81168	2.32381	0.0347377	0.802959	-3.50949
Myo9a	1.45352	7.69631	2.32281	0.0348052	0.802959	-3.66704
Pik3ca	1.25904	6.18602	2.32232	0.0348382	0.802959	-3.97775
Tmem186	-3.62351	2.41232	-2.3218	0.0348729	0.802959	-4.40677
Picalm	0.616868	9.83515	2.32016	0.0349838	0.802959	-3.55034
Gbp5	3.88534	1.12429	2.32003	0.0349925	0.802959	-4.43613
Snrnp48	-2.7243	3.79273	-2.31989	0.0350022	0.802959	-4.32713
Ubap2	3.67356	3.49053	2.31971	0.0350144	0.802959	-4.35067
Pafah2	-2.88271	-2.8664	-2.31953	0.0350268	0.802959	-4.24151
Clta	-0.835166	7.48128	-2.31927	0.0350439	0.802959	-3.7124
Asnsd1	-3.35575	3.59922	-2.31809	0.0351244	0.802959	-4.34301
Kptn	4.81518	-1.02119	2.31774	0.0351482	0.802959	-4.42312
Fignl1	-3.25807	-3.23347	-2.31574	0.0352837	0.802959	-4.17783
Ddi2	-3.68233	2.44285	-2.31566	0.0352893	0.802959	-4.40666
Pycard	1.31814	6.60033	2.3139	0.0354096	0.802959	-3.89872
Zbtb2	-3.11838	5.28219	-2.31259	0.0354989	0.802959	-4.14695
P2rx1	-4.2461	-2.07946	-2.31134	0.0355848	0.802959	-4.34587
Lipo1	3.10283	3.19697	2.3113	0.0355881	0.802959	-4.37154
Nudc	-4.10576	2.04964	-2.30955	0.0357081	0.802959	-4.42009
Nt5c3	-4.03187	-0.984759	-2.30939	0.0357191	0.802959	-4.4257
Nanos1	-5.27692	0.862824	-2.3072	0.0358707	0.802959	-4.4403
Dcun1d5	3.58145	3.90232	2.30686	0.0358941	0.802959	-4.32078
Rpl37a	-0.838274	7.31159	-2.30657	0.0359141	0.802959	-3.75759
Csde1	1.39716	7.38786	2.30594	0.035958	0.802959	-3.74285
Rpgrip1l	3.71517	2.87129	2.30351	0.036127	0.802959	-4.39056
Parg	1.80198	6.07411	2.30338	0.0361355	0.802959	-4.01034
Rp9	4.21748	0.765566	2.30255	0.0361939	0.802959	-4.44158
Zc2hc1a	2.89377	-3.37729	2.30232	0.0362098	0.802959	-4.15419
Vamp4	-1.31499	5.09325	-2.30207	0.0362271	0.802959	-4.1805
Gm1943	2.37768	-3.14307	2.3005	0.0363372	0.802959	-4.20046
Polr2e	-3.72492	3.87847	-2.29989	0.0363798	0.802959	-4.32454
Fam69a	4.08688	1.72918	2.29929	0.0364222	0.802959	-4.42929
Mthfd2	4.34703	-0.68017	2.29716	0.0365719	0.802959	-4.43558
Rassf2	-0.90604	8.10354	-2.29636	0.0366282	0.802959	-3.62342
Tgoln1	1.5919	7.04756	2.29518	0.0367116	0.802959	-3.82036
Tmed8	2.68794	3.52073	2.29418	0.036782	0.802959	-4.35393
2810025M15Rik	2.84016	4.07835	2.28825	0.0372045	0.802959	-4.3092
Gab3	4.02426	-0.612518	2.28718	0.0372819	0.802959	-4.43799
Casp4	3.52211	2.82136	2.286	0.0373665	0.802959	-4.39601
Ppdpf	5.02967	1.66721	2.28455	0.0374705	0.802959	-4.43266
Ttc17	-2.36635	5.23075	-2.28429	0.0374891	0.802959	-4.16642
Chd7	-0.924049	8.12677	-2.28299	0.0375836	0.802959	-3.63438
Epha1	2.62459	-3.2168	2.28252	0.0376171	0.802959	-4.19338
Trim12a	2.03105	4.96614	2.28153	0.0376892	0.802959	-4.20653
Myb	4.28858	-2.11559	2.28064	0.037754	0.802959	-4.34891
Fastk	3.3793	3.01462	2.28048	0.0377655	0.802959	-4.38753
Tlr2	1.34086	5.76047	2.27908	0.0378674	0.802959	-4.08077
Cep104	-4.12041	0.495203	-2.27837	0.0379188	0.802959	-4.44579
Fbxo11	-1.58434	6.39661	-2.27793	0.0379508	0.802959	-3.96274
4931406P16Rik	2.85119	4.5783	2.27761	0.0379743	0.802959	-4.25842
5430405H02Rik	-4.67797	-0.735167	-2.27632	0.0380683	0.802959	-4.43745
Ugt1a2	-4.96147	-1.48314	-2.27489	0.0381732	0.802959	-4.40443
Nlrp1b	1.29789	6.32736	2.27409	0.0382324	0.802959	-3.97853
Cipc	3.51416	3.34078	2.27349	0.0382763	0.802959	-4.37023
Top2b	1.57189	5.98438	2.27227	0.0383658	0.802959	-4.04399
BC020402	-3.4381	-1.0004	-2.27213	0.038376	0.802959	-4.43057
Mta3	3.61508	3.12045	2.27161	0.0384145	0.802959	-4.38355
Pi4k2a	1.42594	5.27976	2.27142	0.0384289	0.802959	-4.16401
Raver1-fdx1l	4.17906	2.32662	2.27014	0.0385233	0.802959	-4.41792
Dock10	0.520578	10.0087	2.26875	0.038626	0.802959	-3.66158
Wibg	-4.29982	-0.523787	-2.26769	0.0387052	0.802959	-4.44188
Got2	3.50089	2.84335	2.26571	0.0388525	0.802959	-4.39859
Gcnt2	-2.73574	4.58685	-2.26565	0.0388569	0.802959	-4.26108
Edem2	-2.02318	5.69084	-2.26545	0.0388718	0.802959	-4.09947
Usp31	3.41772	4.77771	2.26419	0.0389659	0.802959	-4.23791
Leng1	-4.26167	0.987115	-2.26393	0.0389859	0.802959	-4.4451
Mcat	3.82558	2.04963	2.26262	0.0390833	0.802959	-4.42716
Zfp131	-3.54574	3.57648	-2.26131	0.0391818	0.802959	-4.35703
Prickle1	-3.99444	-1.2874	-2.26105	0.0392016	0.802959	-4.4193
Kcnj3	1.62707	-3.99203	2.26065	0.039232	0.802959	-4.03981
Pigu	-2.85757	5.12593	-2.25725	0.0394885	0.802959	-4.19263
Arl6ip1	-1.08667	7.14691	-2.25664	0.0395343	0.802959	-3.83127
Zfp955b	2.41299	4.64091	2.25469	0.0396829	0.802959	-4.25803
Eif3g	1.57243	6.03888	2.25444	0.039702	0.802959	-4.04367
Myadml2	-5.04688	-0.110822	-2.25396	0.0397382	0.802959	-4.44759
Cep170b	1.02564	-3.97189	2.25385	0.0397469	0.802959	-4.04666
Ndufs6	3.64676	1.36205	2.25141	0.0399329	0.802959	-4.44246
Ergic3	1.32022	6.49343	2.25009	0.0400344	0.802959	-3.96171
Luc7l2	0.962513	7.50767	2.24796	0.0401978	0.802959	-3.77158
E2f4	-1.37827	5.12213	-2.24668	0.0402967	0.802959	-4.1972
Pde7a	-2.9113	3.80702	-2.24664	0.0402997	0.802959	-4.34303
Nek6	1.92154	6.67003	2.246	0.0403487	0.802959	-3.93077
Tfap4	-4.45501	1.40315	-2.24537	0.040398	0.802959	-4.44272
Pop1	3.6983	0.0773839	2.24401	0.0405028	0.802959	-4.44987
Nprl2	-3.78241	1.56683	-2.2433	0.040558	0.802959	-4.44037
Gsdmd	-1.29105	7.32783	-2.24281	0.0405961	0.802959	-3.80872
Nae1	-3.3053	3.06914	-2.24219	0.0406443	0.802959	-4.39185
R3hdm1	-1.35887	6.15611	-2.2393	0.0408703	0.802959	-4.03084
Ddx60	-2.83391	3.35975	-2.23871	0.0409162	0.802959	-4.37608
Rnf115	2.54621	2.97586	2.23868	0.0409186	0.802959	-4.39716
Dync1i2	1.50655	6.28728	2.23808	0.0409656	0.802959	-4.00765
Coq9	-4.71259	0.101266	-2.23789	0.0409803	0.802959	-4.45077
Slmo1	-4.32977	-1.3584	-2.23541	0.0411755	0.802959	-4.41921
I730030J21Rik	-2.73011	-3.33071	-2.23514	0.0411964	0.802959	-4.19006
1700084E18Rik	-3.05495	-3.1078	-2.23453	0.0412448	0.802959	-4.22997
Gpsm1	-3.3268	1.49096	-2.23437	0.0412569	0.802959	-4.44288
Setx	1.60819	6.07907	2.23352	0.0413242	0.802959	-4.04789
Rab3b	3.08361	-3.74587	2.23177	0.0414632	0.802959	-4.10475
Nup153	0.997132	6.10062	2.23028	0.041581	0.802959	-4.04585
Sfswap	2.76007	5.22252	2.22883	0.0416964	0.802959	-4.18962
Psmb2	3.07495	4.01736	2.22507	0.0419972	0.802959	-4.33075
Apba1	-3.68809	4.0094	-2.22244	0.0422084	0.802959	-4.3321
9530077C05Rik	-2.48057	-3.44843	-2.22212	0.0422347	0.802959	-4.1726
L3mbtl2	4.08476	2.74567	2.22099	0.0423258	0.802959	-4.41063
Papss1	-1.47681	5.25579	-2.22068	0.0423505	0.802959	-4.18802
Zfp472	-4.75431	0.405392	-2.22045	0.0423695	0.802959	-4.45352
Prg4	-2.61996	-2.59399	-2.22007	0.0423997	0.802959	-4.30936
Fyco1	1.12381	7.69702	2.21856	0.0425224	0.802959	-3.76655
Cx3cr1	3.31641	10.2329	2.21784	0.0425806	0.802959	-3.79602
6030468B19Rik	-3.32093	-0.829587	-2.21781	0.042583	0.802959	-4.4436
Nupr1	-4.02816	1.45621	-2.21779	0.0425854	0.802959	-4.44574
Zfp763	5.39212	1.00223	2.21713	0.0426389	0.802959	-4.45124
Mag	4.08042	0.870488	2.21569	0.042756	0.802959	-4.45243
Gm15706	-2.87372	-3.00745	-2.21498	0.0428142	0.802959	-4.25288
Nudcd3	-3.194	5.42952	-2.21408	0.0428874	0.802959	-4.16488
Kcnip2	3.72357	-2.78541	2.21391	0.0429012	0.802959	-4.28586
4932416H05Rik	-3.66828	-1.84253	-2.21355	0.0429309	0.802959	-4.38787
Gas7	2.92431	-1.59651	2.21201	0.0430569	0.802959	-4.40722
Tmem230	3.00565	5.32607	2.21186	0.0430697	0.802959	-4.18129
Zfp260	-2.25355	5.75861	-2.21136	0.0431104	0.802959	-4.11409
Msr1	3.7926	-2.50555	2.21061	0.0431719	0.802959	-4.3227
Nlgn2	-3.65981	-0.26404	-2.21061	0.0431723	0.802959	-4.45229
Eif4g3	-0.752213	8.05998	-2.21035	0.0431937	0.802959	-3.72122
Fam132b	-2.89677	-2.54798	-2.20946	0.0432669	0.802959	-4.31792
Gimap1	-3.75346	2.87968	-2.20864	0.0433349	0.802959	-4.40707
Cdo1	-3.3018	-3.07556	-2.20793	0.0433934	0.802959	-4.24449
Flt1	-3.07231	-2.92936	-2.20571	0.0435769	0.802959	-4.26778
Camk1d	-1.25333	7.58915	-2.20563	0.0435839	0.802959	-3.79614
Cdk8	-2.34168	4.61752	-2.2042	0.0437029	0.802959	-4.27658
Dennd6a	-1.8983	6.52664	-2.20321	0.0437852	0.802959	-3.98575
Ppil1	-3.75722	-0.249476	-2.20245	0.0438486	0.802959	-4.45349
4933406C10Rik	-2.77723	-3.50149	-2.20106	0.0439649	0.802959	-4.17098
Sel1l	0.851782	7.59521	2.2004	0.04402	0.802959	-3.79996
Mterfd2	3.69632	1.75429	2.20033	0.0440265	0.802959	-4.44305
Yipf1	3.21513	3.2893	2.19963	0.0440851	0.802959	-4.38811
Acbd3	-2.16723	5.82303	-2.19941	0.0441037	0.802959	-4.10945
Psmc4	-2.17619	4.83313	-2.199	0.0441382	0.802959	-4.25279
Dcaf6	-3.77134	2.72746	-2.19842	0.0441867	0.802959	-4.41527
Kdm6b	-3.22831	5.58591	-2.1981	0.0442134	0.802959	-4.14788
Eva1b	-5.02378	0.302737	-2.19451	0.0445162	0.802959	-4.4569
Map2k1	-0.994715	5.8994	-2.19415	0.0445467	0.802959	-4.09957
Ndufc2	-1.50241	4.89097	-2.19391	0.0445677	0.802959	-4.24736
BC051142	4.14348	-2.4126	2.19253	0.0446845	0.802959	-4.33801
Arap2	-4.40626	3.03137	-2.19165	0.0447594	0.802959	-4.40313
Arl2bp	4.27601	-1.42395	2.19067	0.0448427	0.802959	-4.42246
H2-Eb1	4.20821	-1.78201	2.18908	0.044979	0.802959	-4.39746
Mapk1	-1.55847	6.53724	-2.18805	0.0450671	0.802959	-3.99368
Fkbp1a	2.44002	4.88647	2.18745	0.0451185	0.802959	-4.25015
8430427H17Rik	-3.37662	5.55288	-2.18698	0.0451581	0.802959	-4.15796
Cacna1c	1.77992	-3.41891	2.18682	0.0451721	0.802959	-4.19284
Psmg1	-3.93563	-0.995819	-2.18596	0.0452459	0.802959	-4.44333
Ets2	-3.8403	2.37676	-2.18443	0.045378	0.802959	-4.42995
Vps54	-1.26729	7.16169	-2.18394	0.04542	0.802959	-3.88691
E430025E21Rik	-1.41997	6.04189	-2.18386	0.0454272	0.802959	-4.08136
Jmy	-2.35896	5.16103	-2.18365	0.0454449	0.802959	-4.21586
Nup35	-4.76954	-0.305316	-2.18242	0.0455512	0.802959	-4.45571
Clk1	0.856417	9.48937	2.18107	0.0456688	0.802959	-3.71414
Tomm22	1.3836	5.70208	2.17889	0.0458579	0.802959	-4.13874
BC024978	-3.61315	4.03004	-2.17874	0.0458713	0.802959	-4.34129
Ube2d2a	-1.59788	6.43365	-2.17834	0.0459056	0.802959	-4.01792
Ylpm1	-1.09207	7.41712	-2.17818	0.0459193	0.802959	-3.84877
Mospd2	2.9776	3.8964	2.17792	0.0459425	0.802959	-4.35229
Urb1	-4.22754	1.95857	-2.17734	0.0459926	0.802959	-4.44212
Tsr1	3.63532	1.35869	2.17656	0.0460609	0.802959	-4.45283
Gabpb1	2.30594	4.9972	2.17543	0.0461601	0.802959	-4.24048
Mzt1	3.33957	4.22772	2.1749	0.0462065	0.802959	-4.32497
Ccdc15	4.24258	0.347563	2.17431	0.0462579	0.802959	-4.4596
Nat10	-3.28068	2.76466	-2.17368	0.0463137	0.802959	-4.41805
Smad1	1.58832	6.17389	2.17332	0.0463454	0.802959	-4.06513
Dhx29	3.47921	2.62724	2.17237	0.0464291	0.802959	-4.42352
Ccnb2	2.23958	-3.29322	2.17223	0.0464408	0.802959	-4.2212
Apob	3.4096	-2.54694	2.17112	0.0465394	0.802959	-4.32828
4933417D19Rik	2.94102	-2.90627	2.17042	0.0466008	0.802959	-4.28235
Btf3l4	1.61834	5.67752	2.1698	0.0466557	0.802959	-4.14683
Hmgn2	-3.0215	3.67955	-2.16861	0.0467611	0.802959	-4.37027
Fyn	-4.53313	-0.115584	-2.16858	0.0467637	0.802959	-4.45891
Nsmce2	2.56592	4.18749	2.16749	0.0468605	0.802959	-4.3306
Arid4a	-0.742007	7.74678	-2.16664	0.0469362	0.802959	-3.80852
Ube3a	1.43407	5.66824	2.16635	0.0469621	0.802959	-4.14987
Utp6	2.89744	4.22761	2.1625	0.0473057	0.802959	-4.32832
Wdr77	3.45269	4.5525	2.16203	0.047348	0.802959	-4.29666
Hltf	0.999216	6.80056	2.16185	0.0473637	0.802959	-3.96567
Rfwd2	1.96638	5.40513	2.15659	0.0478383	0.802959	-4.1929
Nrf1	-3.75976	4.34037	-2.15608	0.0478843	0.802959	-4.31963
Pik3cg	0.720657	8.87851	2.15497	0.0479846	0.802959	-3.72317
Hars2	3.42465	3.43734	2.1534	0.048128	0.802959	-4.38891
Akr1b3	-4.76342	0.135968	-2.15325	0.0481409	0.802959	-4.46205
Cttnbp2	-1.02552	-3.912	-2.15311	0.0481539	0.802959	-4.10965
Drosha	2.93323	4.09632	2.15267	0.0481943	0.802959	-4.34238
Cep78	3.51394	-2.30122	2.15017	0.0484221	0.802959	-4.36008
Tbc1d4	-3.83176	1.69387	-2.14966	0.0484692	0.802959	-4.45144
Atp5f1	-2.01509	4.40774	-2.14965	0.0484703	0.802959	-4.31497
Nono	1.07518	7.02523	2.14865	0.0485614	0.802959	-3.93755
Ube2j2	-2.60819	2.28738	-2.14856	0.0485698	0.802959	-4.43824
Ggcx	2.05335	4.00227	2.14792	0.0486292	0.802959	-4.35125
Hist1h3e	4.68161	-1.55188	2.14763	0.0486559	0.802959	-4.42165
Hnrnph2	2.34563	4.9465	2.14723	0.0486927	0.802959	-4.25683
Spata13	0.907921	8.15011	2.14712	0.0487025	0.802959	-3.77759
Zfp273	3.79213	-1.03068	2.14635	0.0487734	0.802959	-4.44798
Aurkaip1	-3.20038	3.36232	-2.14554	0.0488484	0.802959	-4.39482
Rnf10	-3.11079	3.87913	-2.14529	0.0488714	0.802959	-4.36139
Irak1bp1	2.91789	-3.40175	2.14466	0.0489297	0.802959	-4.21311
Psmd8	2.51863	4.56402	2.14377	0.0490117	0.802959	-4.301
Epha4	-3.59337	-3.01939	-2.14344	0.0490425	0.802959	-4.27493
Ttpal	-1.6484	6.32439	-2.14336	0.0490502	0.802959	-4.05767
Pdzd2	4.13907	-0.389336	2.14312	0.049072	0.802959	-4.46025
Wipi2	3.90807	0.67937	2.14237	0.049142	0.802959	-4.46317
Bbs7	-3.9237	0.801259	-2.14214	0.0491632	0.802959	-4.46263
Ust	4.02544	-0.799804	2.14128	0.0492424	0.802959	-4.45506
Tmem9b	-2.32341	5.02814	-2.13947	0.0494113	0.802959	-4.24962
Ccl27a	-4.04597	0.414141	-2.13914	0.0494419	0.802959	-4.46419
Ebpl	-4.80097	0.720676	-2.13891	0.0494635	0.802959	-4.46345
Zcchc7	1.1025	6.98854	2.13545	0.0497875	0.802959	-3.95357
Smpdl3a	3.42068	1.9749	2.13471	0.0498572	0.802959	-4.44808
1700029J07Rik	-4.11045	-0.586222	-2.13442	0.0498851	0.802959	-4.45932
Zc3h13	-2.07908	5.56205	-2.13369	0.0499534	0.802959	-4.1805
Pard3b	-2.75534	3.93979	-2.13253	0.050063	0.802959	-4.3599
Ptpru	2.58314	-3.15374	2.13245	0.0500707	0.802959	-4.25865
Zfp692	-4.22932	2.14516	-2.13154	0.0501561	0.802959	-4.4446
Fam83g	3.86276	-1.93427	2.13143	0.0501672	0.802959	-4.39685
Klhl9	1.21875	6.97979	2.13041	0.0502638	0.802959	-3.95879
Lactb2	-1.70771	5.06804	-2.13022	0.0502818	0.802959	-4.24807
Ank	2.16356	4.2982	2.13018	0.0502851	0.802959	-4.33074
Lenep	-4.72843	-0.50853	-2.13005	0.0502975	0.802959	-4.46082
Pfkfb4	-2.93303	4.37531	-2.12981	0.0503207	0.802959	-4.32373
Zfp652os	-3.50214	-2.72003	-2.12968	0.0503326	0.802959	-4.31912
Hnrnpul2	-1.84619	5.74283	-2.12878	0.0504181	0.802959	-4.15647
Pxk	-1.47512	5.13094	-2.12838	0.0504565	0.802959	-4.24088
Atp6v1f	-2.49832	3.55673	-2.1268	0.050607	0.802959	-4.38735
1110038F14Rik	3.96718	2.88613	2.12659	0.0506268	0.802959	-4.42141
Slc38a2	1.63512	6.39858	2.12618	0.0506654	0.802959	-4.056
Klc2	-4.4507	1.01581	-2.12601	0.050682	0.802959	-4.46333
Sall3	-1.12535	7.09593	-2.12566	0.0507151	0.802959	-3.94382
Lyplal1	4.62513	-1.70504	2.12563	0.0507188	0.802959	-4.41509
Fcrls	0.451708	10.8052	2.12546	0.0507349	0.802959	-4.1507
Cdc40	-1.11925	5.6614	-2.12399	0.0508757	0.802959	-4.17065
Sar1b	3.3014	4.41465	2.12383	0.0508911	0.802959	-4.32172
Lmbr1l	-3.60119	0.77612	-2.12372	0.0509011	0.802959	-4.46521
Ict1	3.57849	1.27591	2.12344	0.0509281	0.802959	-4.46112
Clec4a4	3.45657	-3.17262	2.12312	0.0509589	0.802959	-4.25909
Ube2m	-3.70306	0.73381	-2.12175	0.0510904	0.802959	-4.46566
Ttc14	0.553135	8.10848	2.12081	0.0511814	0.802959	-3.80981
Ppap2c	-4.51712	-1.41323	-2.11824	0.0514288	0.802959	-4.43507
Selt	0.822614	7.16847	2.11664	0.0515839	0.802959	-3.93956
Espn	-1.75224	-3.78301	-2.11639	0.0516085	0.802959	-4.15311
Fdx1	3.6918	-0.164205	2.11631	0.0516159	0.802959	-4.46555
Mkks	-3.52739	2.21538	-2.11558	0.0516876	0.802959	-4.44531
Rbm19	-3.41074	1.97788	-2.11542	0.0517033	0.802959	-4.45088
Ubxn8	-2.82076	3.05911	-2.11475	0.0517678	0.802959	-4.41611
Ran	-1.47522	5.95994	-2.11341	0.0518984	0.802959	-4.13172
Ripk1	-2.87363	3.72974	-2.11234	0.0520033	0.802959	-4.37952
Ccdc82	2.91517	4.72071	2.11216	0.0520209	0.802959	-4.2944
Mta2	3.59398	5.53064	2.11159	0.0520768	0.802959	-4.19476
Gstm1	4.59259	-1.28646	2.11119	0.052116	0.802959	-4.44301
Spi1	-1.28577	7.64132	-2.11031	0.052202	0.802959	-3.87608
Klf7	-2.77135	3.45603	-2.11003	0.0522301	0.802959	-4.39683
Nfe2l1	-1.59717	5.75776	-2.10839	0.0523914	0.802959	-4.16409
Adam15	-1.10928	7.90105	-2.10775	0.052454	0.802959	-3.84587
4833439L19Rik	-1.49185	6.43013	-2.10766	0.0524634	0.802959	-4.0624
Padi2	-1.57126	6.38866	-2.1051	0.052716	0.802959	-4.07045
Dazap1	1.50476	4.33504	2.10339	0.052885	0.802959	-4.33485
Wrn	-2.36398	5.54401	-2.1032	0.0529042	0.802959	-4.19662
Apip	4.57167	1.70136	2.10276	0.0529482	0.802959	-4.45801
Stx7	1.2008	7.47624	2.10231	0.0529928	0.802959	-3.90597
Zcchc9	-1.81008	4.5621	-2.10137	0.0530863	0.802959	-4.31407
Ppp1r15a	-4.35993	-0.804691	-2.10075	0.0531479	0.802959	-4.46064
Dhx33	-2.23493	4.94269	-2.10071	0.053152	0.802959	-4.27364
B230217C12Rik	-2.79469	-3.51885	-2.10062	0.0531608	0.802959	-4.21065
Cpne8	-1.71979	-2.93455	-2.10048	0.0531752	0.802959	-4.30071
Carkd	-3.76272	2.10724	-2.10002	0.0532216	0.802959	-4.4503
Taf1a	-4.01547	1.27353	-2.09999	0.0532247	0.802959	-4.46435
Arhgef9	3.41428	-2.61134	2.09904	0.053319	0.802959	-4.3404
Mrpl34	5.18	1.17159	2.09829	0.0533939	0.802959	-4.46565
Ednra	-2.31037	-3.71019	-2.09683	0.0535411	0.802959	-4.17695
Slfn10-ps	4.44169	-1.21633	2.09549	0.0536753	0.802959	-4.44843
Gpm6a	4.41725	-1.402	2.09375	0.0538514	0.802959	-4.43973
Stbd1	2.67571	-3.03871	2.09261	0.0539663	0.802959	-4.28919
Fam219b	-3.95058	4.20588	-2.09188	0.0540404	0.802959	-4.34909
Yrdc	4.18029	-0.718463	2.09148	0.0540803	0.802959	-4.46345
Mapk8ip3	-1.64694	5.41881	-2.09147	0.0540821	0.802959	-4.21853
Zfp874a	3.5706	2.89998	2.09075	0.054155	0.802959	-4.42722
Slc25a12	-2.87024	3.46698	-2.09071	0.0541593	0.802959	-4.40024
B930059L03Rik	-3.64973	-2.27128	-2.08962	0.0542698	0.802959	-4.37725
Tram2	-4.85587	1.61715	-2.08791	0.0544435	0.802959	-4.46149
Irf1	-3.69813	3.6503	-2.08772	0.0544636	0.802959	-4.39009
Xlr3b	4.14657	1.33356	2.08734	0.0545022	0.802959	-4.46539
Fam65a	-3.20691	3.96592	-2.08692	0.0545449	0.802959	-4.36905
Prdm15	3.87218	0.988725	2.0866	0.0545782	0.802959	-4.46881
0610030E20Rik	-1.53749	6.20892	-2.0865	0.0545882	0.802959	-4.10893
Kctd12b	3.67999	2.46216	2.08607	0.0546321	0.802959	-4.44317
Slc9a6	-3.67959	2.09525	-2.08474	0.0547686	0.802959	-4.45288
D11Wsu47e	4.72423	0.0518877	2.08452	0.0547907	0.802959	-4.4708
Ppfia3	-3.41801	-2.85041	-2.08413	0.0548311	0.802959	-4.3166
Itgam	0.657986	10.9033	2.08374	0.0548713	0.802959	-4.26405
Chchd3	-2.48316	2.46458	-2.08254	0.0549947	0.802959	-4.44366
Ccnc	1.92788	3.45074	2.08236	0.0550123	0.802959	-4.40286
Med4	2.86856	1.51291	2.08235	0.0550134	0.802959	-4.46379
Ppih	3.34467	-1.14624	2.08234	0.0550154	0.802959	-4.45324
Crlf2	-3.25438	0.834761	-2.08111	0.055142	0.802959	-4.47052
Zc3h8	4.28926	1.63815	2.08029	0.0552262	0.802959	-4.46223
Ppp2r3a	1.70486	6.03835	2.07974	0.0552833	0.802959	-4.13787
Phyhip	-3.64252	-2.92162	-2.07931	0.0553283	0.802959	-4.30912
Adam8	-3.53599	-2.39199	-2.07895	0.0553655	0.802959	-4.36845
Kdm2a	-1.62592	7.17108	-2.07744	0.0555215	0.802959	-3.97031
Kpna2	-2.53653	4.05006	-2.07741	0.0555251	0.802959	-4.36516
Dnah2	-2.53186	-3.60414	-2.07713	0.0555545	0.802959	-4.20572
Wdr41	-2.11517	5.08421	-2.07606	0.0556653	0.802959	-4.26614
Rpl39	0.588412	7.21516	2.07556	0.0557174	0.802959	-3.96547
Sin3b	2.07223	5.19757	2.07482	0.0557947	0.802959	-4.25315
Ppm1g	2.25471	5.02447	2.0745	0.0558275	0.802959	-4.27362
Ngly1	-3.02336	2.86197	-2.07436	0.0558423	0.802959	-4.43162
Neurl1a	-3.11524	4.16102	-2.07359	0.0559227	0.802959	-4.35756
Fzd7	2.95673	1.13931	2.07351	0.0559312	0.802959	-4.46929
Gnpda1	1.73202	5.24975	2.07289	0.0559961	0.802959	-4.24756
Coq4	4.3059	0.579146	2.07279	0.0560065	0.802959	-4.47266
Tgfbr2	0.902456	8.82389	2.07277	0.0560084	0.802959	-3.82655
Isoc2b	-4.37253	-1.22436	-2.07089	0.0562064	0.802959	-4.4519
Cks2	-2.46437	-3.36661	-2.0682	0.0564888	0.802959	-4.2495
Hook3	0.619155	9.08648	2.06818	0.0564916	0.802959	-3.83896
Arfgef2	2.46321	4.83001	2.06772	0.0565394	0.802959	-4.29737
Tmem179b	-2.26312	3.96931	-2.06748	0.0565653	0.802959	-4.37356
Selk	2.85361	4.62305	2.0673	0.0565839	0.802959	-4.31853
Syt15	3.85079	-2.3833	2.06708	0.0566074	0.802959	-4.37221
Fbxl8	4.2819	-2.13515	2.06693	0.056623	0.802959	-4.39427
Ufsp1	3.74371	-0.631445	2.06686	0.056631	0.802959	-4.46802
Sptan1	2.46212	4.94204	2.0665	0.0566685	0.802959	-4.2857
Gsap	-1.26081	5.85251	-2.06586	0.0567365	0.802959	-4.17149
Mitf	-2.46482	3.66642	-2.06348	0.0569897	0.802959	-4.39446
Plxna4os1	2.90864	3.13889	2.06194	0.0571529	0.802959	-4.4224
Gstt3	-3.69523	-2.64497	-2.06071	0.0572845	0.802959	-4.34727
Ddx5	0.539265	10.4749	2.06002	0.0573591	0.802959	-4.12319
Eef2k	-1.01311	7.59907	-2.05972	0.0573905	0.802959	-3.92763
Adamts1	2.64895	-3.36635	2.05902	0.0574657	0.802959	-4.25316
Hsf2bp	-4.8167	-0.948349	-2.05892	0.0574765	0.802959	-4.46312
Stxbp5	-1.06411	7.56069	-2.05855	0.0575158	0.802959	-3.93344
Mki67	-4.16121	0.849601	-2.05834	0.0575391	0.802959	-4.47344
Etv6	-1.52536	6.73918	-2.05737	0.0576424	0.802959	-4.04819
Wdr4	-3.28611	1.03311	-2.05711	0.0576712	0.802959	-4.47239
Naa38	3.27834	1.51562	2.05666	0.0577194	0.802959	-4.46733
Zfp667	3.69905	-0.486551	2.05614	0.0577757	0.802959	-4.47108
Dzank1	-3.60484	-2.81152	-2.05545	0.0578501	0.802959	-4.32998
D630023F18Rik	2.12755	-3.81099	2.0553	0.0578657	0.802959	-4.17774
Cflar	0.868574	8.17878	2.0552	0.0578762	0.802959	-3.87279
Coq2	2.42573	4.43404	2.05482	0.0579174	0.802959	-4.3398
Rad51b	3.60675	-1.41834	2.05439	0.0579636	0.802959	-4.4453
Stxbp3b	-1.90067	-2.99927	-2.05296	0.058119	0.802959	-4.30763
Ncapg	-2.25229	-3.14551	-2.05276	0.05814	0.802959	-4.28809
Hspa2	-1.80553	-3.68693	-2.05251	0.0581679	0.802959	-4.20203
Apc	0.822477	8.42601	2.0523	0.0581902	0.802959	-3.86036
Zik1	-4.25739	-0.889331	-2.05199	0.0582238	0.802959	-4.46564
Mapkbp1	-4.42557	3.77356	-2.0512	0.0583092	0.802959	-4.39057
Syp	3.60057	-0.195511	2.05106	0.0583255	0.802959	-4.47402
Zzef1	2.01838	5.99949	2.0506	0.058375	0.802959	-4.15883
Scfd1	-3.70413	3.40912	-2.04952	0.0584921	0.802959	-4.41181
Sephs1	-3.38366	3.48884	-2.04836	0.0586186	0.802959	-4.40786
Nhej1	3.1877	-2.66629	2.04832	0.0586235	0.802959	-4.34841
Phldb1	-4.11685	-0.504639	-2.04813	0.0586445	0.802959	-4.47197
Myo18a	-1.86284	5.39411	-2.04766	0.0586952	0.802959	-4.24003
Hus1	-4.35704	1.9664	-2.04689	0.0587803	0.802959	-4.46126
Oxld1	4.10617	-1.62377	2.04671	0.0587994	0.802959	-4.43478
Map3k4	-2.99331	5.21714	-2.04659	0.0588123	0.802959	-4.26176
Polr2h	4.24197	0.43052	2.04356	0.0591453	0.802959	-4.47669
Pced1a	3.27289	3.28907	2.04236	0.0592771	0.802959	-4.41924
Gm166	3.34798	0.0381355	2.04229	0.0592855	0.802959	-4.47629
Slc2a12	2.5238	-2.67294	2.04184	0.0593343	0.802959	-4.3495
Aagab	1.61326	5.6938	2.04137	0.0593866	0.802959	-4.2047
Noa1	3.92787	1.07768	2.03948	0.0595963	0.802959	-4.47439
Pou2f2	1.02512	8.06327	2.03904	0.0596449	0.802959	-3.89892
Rnf135	2.05981	4.98288	2.03895	0.0596548	0.802959	-4.29096
Xpo7	1.27339	6.60076	2.03814	0.059745	0.802959	-4.08097
5730480H06Rik	3.8012	-1.48602	2.03794	0.0597666	0.802959	-4.4444
Trappc9	-2.4614	4.01435	-2.03754	0.0598108	0.802959	-4.3777
Adar	-3.1569	3.21405	-2.0361	0.0599717	0.802959	-4.42394
Usp5	3.75393	0.836238	2.03586	0.0599981	0.802959	-4.47648
Manba	-2.43796	3.57087	-2.03388	0.06022	0.802959	-4.40642
Nsmce4a	3.10351	2.35215	2.03362	0.0602485	0.802959	-4.45455
Mlph	-1.45063	7.0116	-2.03203	0.0604273	0.802959	-4.0277
Nlrc5	-4.59013	-0.571693	-2.03199	0.060431	0.802959	-4.47345
Zfp580	-4.39174	-0.161062	-2.0314	0.0604976	0.802959	-4.47681
Myh9	-0.917504	7.47266	-2.03137	0.0605014	0.802959	-3.96816
Recql5	3.51365	2.56281	2.03115	0.060526	0.802959	-4.44908
Igf1r	-1.40492	6.43319	-2.03113	0.0605276	0.802959	-4.10907
S100a11	-2.23318	-1.45967	-2.03074	0.0605717	0.802959	-4.44701
Hist1h2ai	-2.94812	-2.01286	-2.03009	0.0606446	0.802959	-4.41168
Trim28	-1.48919	5.9848	-2.02998	0.060657	0.802959	-4.17161
Tmem161b	-3.50544	2.14779	-2.02874	0.060797	0.802959	-4.46018
Prrc2a	-1.06242	8.35062	-2.02735	0.0609547	0.802959	-3.89188
Prdm10	3.30873	0.0743869	2.027	0.0609935	0.802959	-4.47841
1700066B19Rik	4.5355	-1.87728	2.0265	0.0610503	0.802959	-4.42205
Gm10548	3.938	-1.04392	2.02576	0.061134	0.802959	-4.46523
Uqcc1	-3.45198	-0.0385111	-2.02464	0.0612617	0.802959	-4.47832
Snap25	3.3728	1.0359	2.02436	0.0612939	0.802959	-4.47674
2310045N01Rik	-3.85593	0.283066	-2.02343	0.0613997	0.802959	-4.47929
Man1a2	0.685365	8.62689	2.02339	0.0614034	0.802959	-3.88729
Ahsa2	2.76943	4.42419	2.02286	0.061464	0.802959	-4.34982
Syap1	-2.00224	3.44796	-2.02285	0.061465	0.802959	-4.41529
Fgr	-2.51907	-3.19048	-2.02231	0.061527	0.802959	-4.29273
Cep72	4.11006	-0.339831	2.02178	0.0615878	0.802959	-4.47692
Cask	-1.01837	6.4775	-2.02163	0.0616052	0.802959	-4.10878
Snrpd3	3.25377	-1.14809	2.01977	0.0618173	0.802959	-4.46259
Ptges3	-1.03999	5.76249	-2.01955	0.0618427	0.802959	-4.20609
4930512B01Rik	3.23834	-1.93041	2.01935	0.0618653	0.802959	-4.4198
Spata2l	-3.73196	-0.638849	-2.01925	0.0618769	0.802959	-4.47444
Serf2	-0.885489	6.73729	-2.01784	0.0620393	0.802959	-4.07543
Mpp5	2.26308	5.3299	2.01781	0.062042	0.802959	-4.25998
Pnck	-2.17278	-2.99397	-2.01702	0.062134	0.802959	-4.32004
Loxl4	-4.68577	-0.388145	-2.01631	0.0622151	0.802959	-4.47728
Lipa	1.3293	6.43708	2.01567	0.062289	0.802959	-4.11801
Ankrd28	3.45614	2.58255	2.01476	0.0623937	0.802959	-4.45119
Nphp3	4.56473	1.46116	2.01466	0.0624056	0.802959	-4.47385
Gm12992	3.2256	-1.3187	2.01406	0.0624751	0.802959	-4.4569
Tbck	1.92428	4.89236	2.01389	0.0624945	0.802959	-4.30912
Terf2ip	3.99465	3.29615	2.01382	0.0625033	0.802959	-4.42452
Tm9sf3	0.71857	7.72557	2.01378	0.0625072	0.802959	-3.95537
Tbrg1	3.8009	0.283047	2.01374	0.0625126	0.802959	-4.48055
Tapbpl	3.80438	2.13918	2.01373	0.062513	0.802959	-4.46264
Trim32	-4.42347	1.74524	-2.01261	0.0626428	0.802959	-4.47015
Pfn1	-1.04643	8.29021	-2.01175	0.0627424	0.802959	-3.91202
Smim1	4.35002	1.6945	2.01098	0.0628324	0.802959	-4.47116
Bcat2	-3.99843	1.53414	-2.01097	0.0628339	0.802959	-4.47343
Plxnd1	2.78793	-3.03664	2.00967	0.0629855	0.802959	-4.31717
Ccr5	0.825204	9.14736	2.00966	0.0629861	0.802959	-3.9189
Cntd1	-1.87995	2.73809	-2.00963	0.0629892	0.802959	-4.4472
Fam210a	0.975648	8.08454	2.00948	0.0630076	0.802959	-3.92754
Rhno1	4.38704	0.758941	2.00884	0.063082	0.802959	-4.48041
Bloc1s2	-4.00316	2.71454	-2.00752	0.0632357	0.802959	-4.44833
Gm960	-1.75776	-3.61902	-2.00728	0.0632646	0.802959	-4.23429
4930427A07Rik	-2.784	-3.3627	-2.00556	0.0634664	0.802959	-4.27468
Ifrd2	-4.52493	-1.29296	-2.00532	0.0634944	0.802959	-4.45936
Gm16702	3.59462	-1.61717	2.00493	0.0635403	0.802959	-4.44258
4933421O10Rik	3.09358	2.99229	2.00442	0.0635999	0.802959	-4.43911
Gmds	3.1182	-0.716218	2.00183	0.0639053	0.802959	-4.47586
Ttc32	3.06492	0.529921	2.00182	0.0639067	0.802959	-4.48202
Ifitm10	-3.25297	2.57916	-2.00097	0.0640064	0.802959	-4.45356
Hmox2	-1.18439	5.01877	-2.00007	0.0641134	0.802959	-4.30101
Dgcr8	3.00796	1.81695	1.99954	0.0641767	0.802959	-4.47089
Wwox	-3.55083	-0.960076	-1.9993	0.0642043	0.802959	-4.47136
Gm2011	1.66464	-3.66857	1.99734	0.0644374	0.802959	-4.23059
Pcmtd1	0.854544	7.55783	1.99578	0.0646234	0.802959	-3.98942
Irgq	2.72832	4.0938	1.99571	0.0646314	0.802959	-4.38261
Cep152	-1.49617	5.41943	-1.99443	0.0647847	0.802959	-4.25921
Tsc22d2	1.54828	6.84169	1.9944	0.0647885	0.802959	-4.07767
Hspa5	0.618656	9.40726	1.99337	0.0649117	0.802959	-3.96656
Arhgap27	-1.11912	8.04746	-1.99179	0.065101	0.802959	-3.94823
Rbm17	2.0921	4.85655	1.99129	0.0651607	0.802959	-4.32031
Man2a1	-1.89454	5.14496	-1.99104	0.0651911	0.802959	-4.29104
Ypel5	-1.84089	5.82751	-1.99062	0.0652419	0.802959	-4.21185
Aldh3a2	1.79815	5.33235	1.9894	0.0653885	0.802959	-4.27118
Repin1	3.27159	2.21022	1.98817	0.0655375	0.802959	-4.46499
Gm16386	-3.4013	-0.721676	-1.98812	0.0655434	0.802959	-4.47766
Srebf1	-1.94787	2.69031	-1.98809	0.0655466	0.802959	-4.45238
Sptbn4	2.25959	-3.21307	1.98735	0.0656362	0.802959	-4.30228
Hpgds	0.541058	9.09147	1.98703	0.0656759	0.802959	-3.94414
Ccdc53	2.99385	3.07258	1.9868	0.0657033	0.802959	-4.43924
Fth1	-0.396621	9.38247	-1.98628	0.0657658	0.802959	-3.97303
Tpst1	-3.74168	0.530973	-1.98438	0.0659967	0.802959	-4.48428
Tmem203	4.0429	-0.965476	1.98341	0.0661152	0.802959	-4.4735
Sash1	-2.89458	-2.69255	-1.98314	0.0661483	0.802959	-4.36394
Mrpl2	4.07503	1.2245	1.98278	0.0661921	0.802959	-4.48072
Dctpp1	3.57206	3.55164	1.98221	0.066262	0.802959	-4.41844
Rwdd1	2.94975	2.59205	1.97893	0.0666626	0.802959	-4.45681
Nhlrc3	-2.90271	2.34315	-1.97845	0.0667224	0.802959	-4.46343
Hnrnpd	0.930581	7.35707	1.97782	0.0668	0.802959	-4.027
Vps33a	-1.9651	5.29695	-1.97776	0.066807	0.802959	-4.27977
Pdss1	-2.56238	-1.65675	-1.97771	0.0668131	0.802959	-4.44511
Emc7	2.21788	4.88163	1.97757	0.0668301	0.802959	-4.32252
Mfge8	4.04551	-0.206406	1.97653	0.0669581	0.802959	-4.4838
Pnpt1	-2.81423	3.3567	-1.97647	0.0669656	0.802959	-4.4291
Trp53bp1	1.58565	5.78454	1.97591	0.0670349	0.802959	-4.22423
Wbscr16	-4.23433	-1.16311	-1.97375	0.0673018	0.802959	-4.46897
Tspyl4	4.40895	-1.42217	1.97273	0.0674278	0.802959	-4.45849
Tmem191c	2.99777	-2.75151	1.97272	0.0674289	0.802959	-4.36091
6820408C15Rik	-2.93786	-3.40715	-1.97175	0.0675497	0.802959	-4.28163
Gadl1	-1.58045	-3.65401	-1.97167	0.0675593	0.802959	-4.2446
Orai1	-2.71501	5.34038	-1.97147	0.0675849	0.802959	-4.27752
Ccng1	-2.37531	5.57217	-1.97145	0.067587	0.802959	-4.25141
Rpf2	-3.10715	0.324838	-1.97098	0.0676455	0.802959	-4.48614
Fam117b	-0.875273	7.70381	-1.97086	0.0676599	0.802959	-3.99707
Maged1	1.29488	6.69704	1.97014	0.0677505	0.802959	-4.11283
Eif1	-0.734177	7.21351	-1.96938	0.0678448	0.802959	-4.05026
Mbd4	-3.71022	0.0959546	-1.96906	0.0678844	0.802959	-4.48603
Hck	-1.05701	7.17281	-1.96848	0.0679569	0.802959	-4.05571
Stat5a	-3.60135	1.99452	-1.9677	0.0680544	0.802959	-4.47239
Ms4a6c	-3.34779	-0.131531	-1.96709	0.0681311	0.802959	-4.48543
Coro1b	0.840354	7.03569	1.96591	0.0682788	0.802959	-4.07394
Me2	-3.97875	2.26307	-1.96583	0.0682892	0.802959	-4.46724
Zfp276	-2.12842	5.36701	-1.96571	0.0683043	0.802959	-4.27695
Rras2	-3.41958	1.75934	-1.96551	0.0683295	0.802959	-4.47664
Ash2l	1.41777	4.88302	1.96549	0.068331	0.802959	-4.32647
Cul9	3.307	3.13279	1.96513	0.0683772	0.802959	-4.44087
Wasf1	-2.6829	-3.27637	-1.96473	0.0684268	0.802959	-4.30221
Spata7	2.97813	-1.84435	1.96449	0.0684567	0.802959	-4.43629
Fgf12	-0.763664	-4.148	-1.96391	0.0685303	0.802959	-4.18346
Tsta3	-4.19371	1.45437	-1.96379	0.0685455	0.802959	-4.48093
4931431C16Rik	-3.43887	-2.11066	-1.96342	0.0685918	0.802959	-4.41872
Kri1	4.02951	2.04079	1.963	0.0686452	0.802959	-4.47223
Cdkn1a	-4.86785	-0.271864	-1.96196	0.0687754	0.802959	-4.48534
Mtcp1	3.12474	1.92203	1.96175	0.0688025	0.802959	-4.47455
Csrnp2	4.49443	1.06944	1.96163	0.0688173	0.802959	-4.48482
Cnot8	1.13866	5.53471	1.96087	0.0689134	0.802959	-4.26033
Gtf2f2	-3.87655	1.69264	-1.96055	0.0689544	0.802959	-4.47831
Fam20b	3.02831	3.54211	1.96044	0.0689683	0.802959	-4.42351
Cd2ap	0.990367	8.05768	1.96012	0.0690091	0.802959	-3.9795
Bmi1	2.1506	3.98174	1.95722	0.0693765	0.802959	-4.39955
Eif1a	2.34348	4.82803	1.95711	0.0693909	0.802959	-4.33439
BC002163	-3.23507	1.07004	-1.95709	0.0693938	0.802959	-4.48542
Ankrd37	3.5301	-2.35392	1.95458	0.0697143	0.802959	-4.40213
Fam102b	0.583097	9.20458	1.9543	0.0697489	0.802959	-3.99572
Telo2	3.81451	-0.237421	1.95402	0.0697848	0.802959	-4.48659
Tex264	-3.91829	1.08877	-1.95402	0.0697858	0.802959	-4.48568
Gad1	-2.54017	-3.2672	-1.95296	0.0699214	0.802959	-4.30778
Wdr74	3.84306	2.1894	1.95235	0.0699995	0.802959	-4.47088
Glb1	2.4355	3.39481	1.94839	0.0705086	0.802959	-4.43298
Gatad1	-3.39624	2.87832	-1.94803	0.0705556	0.802959	-4.45322
2410016O06Rik	3.3919	1.7865	1.94756	0.0706164	0.802959	-4.47879
Slc24a1	2.83453	2.37817	1.94662	0.0707376	0.802959	-4.46757
Abca3	-2.02355	4.49148	-1.94657	0.0707448	0.802959	-4.36632
Dlg5	3.9811	-2.46186	1.94561	0.0708687	0.802959	-4.39533
Clec11a	2.76835	-3.08053	1.94547	0.0708872	0.802959	-4.33336
Ccdc107	2.53083	3.45479	1.94472	0.0709847	0.802959	-4.43099
2310010J17Rik	2.45174	-3.09106	1.94443	0.0710226	0.802959	-4.33248
Pik3r2	3.28302	2.3866	1.94432	0.0710363	0.802959	-4.46774
Scd2	1.48706	5.26933	1.94365	0.0711232	0.802959	-4.29615
Ddx3y	1.16775	6.01446	1.9434	0.0711561	0.802959	-4.21289
Mlx	-3.3804	2.64336	-1.94324	0.0711769	0.802959	-4.46126
Kat8	3.33782	1.75271	1.94149	0.0714048	0.802959	-4.48014
Exoc5	-0.954496	5.76288	-1.94107	0.07146	0.802959	-4.24336
Tsr2	-3.13897	-0.882992	-1.93969	0.0716402	0.802959	-4.4816
Tef	2.91895	3.76474	1.93946	0.0716712	0.802959	-4.41644
Uprt	3.90824	-0.470068	1.9386	0.0717839	0.802959	-4.487
Ncoa5	3.96657	2.31161	1.93854	0.0717915	0.802959	-4.47036
Mxra7	-2.84276	-3.3193	-1.93752	0.0719263	0.802959	-4.30682
Ubox5	3.49553	0.412418	1.9371	0.0719808	0.802959	-4.49052
Lnx1	2.47047	-1.91337	1.93701	0.0719932	0.802959	-4.43736
2210408I21Rik	3.60285	0.634487	1.93626	0.0720914	0.802959	-4.49029
Arhgef25	-3.48823	-2.12902	-1.93549	0.0721932	0.802959	-4.42347
Znf512b	-2.96299	3.9683	-1.93532	0.0722158	0.802959	-4.40568
Snx14	2.04314	5.30464	1.93504	0.0722518	0.802959	-4.2959
Mdm4	0.528514	7.4496	1.93493	0.0722666	0.802959	-4.05302
Kctd2	-3.48952	2.55225	-1.93488	0.0722734	0.802959	-4.46509
Atg4a	3.68523	-1.0071	1.93373	0.0724252	0.802959	-4.47959
D330045A20Rik	-2.95301	-1.92968	-1.93307	0.0725131	0.802959	-4.43712
Msantd2	1.9382	4.06462	1.93304	0.0725172	0.802959	-4.40026
Cep135	1.99088	4.67419	1.93162	0.0727048	0.802959	-4.35599
Asf1a	2.06987	3.1786	1.93125	0.0727546	0.802959	-4.44542
Entpd4	2.28642	4.3677	1.93093	0.0727966	0.802959	-4.38015
Slc25a17	3.38779	3.27824	1.93063	0.072837	0.802959	-4.44156
Alkbh7	-3.88101	-1.10391	-1.93062	0.0728386	0.802959	-4.47736
Fam53c	4.05371	3.38854	1.9301	0.0729073	0.802959	-4.43693
Timm10b	2.08904	4.12701	1.92997	0.0729242	0.802959	-4.39703
Lrp4	-3.90461	2.2884	-1.92952	0.0729847	0.802959	-4.47226
Grwd1	4.03281	-1.47899	1.92936	0.0730061	0.802959	-4.46292
Nfkbil1	-3.322	-1.55756	-1.92878	0.0730838	0.802959	-4.45913
Ago1	-1.12606	7.02368	-1.92866	0.0730995	0.802959	-4.10292
Ufc1	3.31583	3.17757	1.9285	0.0731209	0.802959	-4.44598
Prdm1	1.68544	5.06278	1.92664	0.0733689	0.802959	-4.323
Ppp1r8	3.80911	2.84738	1.92447	0.0736599	0.802959	-4.45833
Rad9b	3.89123	-1.57954	1.92439	0.0736713	0.802959	-4.45874
Srpk2	-2.05542	4.59809	-1.92417	0.073701	0.802959	-4.36449
Zfp51	-3.1346	1.34053	-1.92344	0.0737988	0.802959	-4.48761
Myeov2	3.06192	1.9479	1.92342	0.0738014	0.802959	-4.47968
Dlg3	-3.44327	2.61745	-1.92335	0.0738107	0.802959	-4.46524
Igip	2.24208	2.8805	1.91981	0.0742883	0.802959	-4.45808
Sowahc	0.708321	7.5621	1.91838	0.0744828	0.802959	-4.05672
Coro1a	-0.935342	8.45529	-1.91805	0.0745271	0.802959	-4.00911
Trim30b	3.98448	2.00321	1.91802	0.0745312	0.802959	-4.47953
Txndc9	-1.85159	4.78741	-1.91633	0.0747619	0.802959	-4.35131
Senp7	2.00893	5.72891	1.91539	0.0748898	0.802959	-4.2592
Fau	0.862209	7.68687	1.91456	0.0750025	0.802959	-4.04963
Stip1	3.28946	3.99259	1.91435	0.075032	0.802959	-4.40927
Ogg1	-3.0274	-1.55672	-1.9143	0.0750379	0.802959	-4.46164
Stim2	3.1379	2.60637	1.91422	0.0750487	0.802959	-4.46703
Abcg1	1.20226	7.1468	1.91326	0.0751802	0.802959	-4.10119
2410006H16Rik	-2.72736	3.33276	-1.91295	0.0752231	0.802959	-4.44273
Elmo3	-3.05131	-0.702386	-1.91265	0.0752645	0.802959	-4.48824
Faf2	1.49754	4.82133	1.91253	0.0752807	0.802959	-4.34965
1110057K04Rik	-2.14972	4.89645	-1.91223	0.0753221	0.802959	-4.34323
Gdpgp1	-3.81529	0.756184	-1.91213	0.0753359	0.802959	-4.49303
Irf8	-0.764483	7.76194	-1.90943	0.0757062	0.802959	-4.04856
Frat2	3.68539	-1.28334	1.90932	0.075721	0.802959	-4.47465
Slc44a2	-0.995019	7.94187	-1.90802	0.0759	0.802959	-4.03792
Cldn12	3.69999	0.0573841	1.90705	0.0760346	0.802959	-4.49396
Cdc37	-1.98927	4.85576	-1.90592	0.0761909	0.802959	-4.34887
Phlpp2	-1.42788	4.78317	-1.90581	0.0762066	0.802959	-4.35507
Zfp27	-3.19205	1.72808	-1.90552	0.0762465	0.802959	-4.48556
Ciz1	-1.00365	6.16093	-1.90383	0.0764807	0.802959	-4.21703
Map9	-4.17917	-1.74519	-1.90311	0.0765817	0.802959	-4.45366
Zfp882	-2.34154	4.66167	-1.90254	0.0766605	0.802959	-4.366
Pdcd6ip	1.10218	7.28418	1.90217	0.076712	0.802959	-4.096
Cdc42ep3	3.64805	1.61705	1.90194	0.0767434	0.802959	-4.48752
Heg1	2.31021	-2.75389	1.90169	0.0767783	0.802959	-4.3811
Nras	-0.945764	7.54978	-1.90165	0.0767845	0.802959	-4.07226
Gimap6	-2.30992	3.88433	-1.90135	0.0768261	0.802959	-4.4186
Slc16a6	1.13484	7.04407	1.90107	0.076866	0.802959	-4.12106
Plscr3	2.1353	4.91196	1.90106	0.0768666	0.802959	-4.34564
Kank3	-3.68972	-0.1355	-1.90026	0.076979	0.802959	-4.49413
Dclk2	-4.09031	-0.651981	-1.89988	0.0770311	0.802959	-4.49051
Smug1	3.77206	1.58786	1.8996	0.0770714	0.802959	-4.4882
Akap3	-3.45853	-1.42065	-1.8984	0.0772386	0.802959	-4.47065
Plekhm2	2.54751	3.22128	1.89806	0.0772868	0.802959	-4.45006
Prrg4	-3.20383	-2.86821	-1.898	0.0772946	0.802959	-4.37125
Gm2506	-2.26046	-2.78282	-1.89745	0.0773725	0.802959	-4.37962
Saysd1	2.89048	0.889529	1.89718	0.0774103	0.802959	-4.49438
Eif4enif1	-2.4774	5.1538	-1.89718	0.0774105	0.802959	-4.32521
Zfp940	-3.11883	-1.34815	-1.89717	0.0774111	0.802959	-4.474
Ccdc94	-2.36148	-2.99701	-1.89572	0.0776153	0.802959	-4.35895
Smc3	1.3573	6.05281	1.89513	0.0776986	0.802959	-4.23368
Maged2	3.32005	2.68318	1.89493	0.0777267	0.802959	-4.46815
Cox16	-1.86135	4.08698	-1.89486	0.0777371	0.802959	-4.40839
Trio	-0.623807	8.94706	-1.89429	0.0778172	0.802959	-4.05015
Hps5	1.65695	4.12128	1.89411	0.0778422	0.802959	-4.40648
Sars2	-4.22459	-0.796438	-1.89393	0.0778684	0.802959	-4.48951
Ccdc73	3.31823	-0.361169	1.89291	0.0780121	0.802959	-4.49385
Bloc1s5	3.2701	-0.765861	1.89267	0.0780468	0.802959	-4.49014
Xpnpep1	-3.14828	2.97984	-1.89194	0.0781493	0.802959	-4.45975
Unc13a	-3.73973	-1.35894	-1.89081	0.07831	0.802959	-4.47454
Psmc3ip	-2.61929	-2.56331	-1.89078	0.0783139	0.802959	-4.40086
D8Ertd738e	1.62668	4.39988	1.89074	0.0783194	0.802959	-4.38902
Irgm2	0.985761	7.18443	1.89043	0.0783635	0.802959	-4.11489
Tcp11l1	-2.84465	2.09382	-1.89042	0.0783656	0.802959	-4.48199
Rtn4rl1	0.585328	8.10513	1.88928	0.0785272	0.802959	-4.04824
Banf1	3.02171	0.650416	1.8892	0.078538	0.802959	-4.49632
Grb2	-1.56579	6.43662	-1.88914	0.0785466	0.802959	-4.19476
Gm10052	4.00039	-2.30596	1.88839	0.0786545	0.802959	-4.42144
Mthfsd	-3.87155	-1.11105	-1.88809	0.0786972	0.802959	-4.48338
Erc1	-4.97233	-0.186306	-1.88804	0.078704	0.802959	-4.49549
Prr14	2.4396	5.27704	1.88782	0.0787349	0.802959	-4.31717
Vps37d	2.4521	-3.29646	1.88743	0.0787904	0.802959	-4.32844
Abca8a	-1.94842	-3.70707	-1.88717	0.0788278	0.802959	-4.27507
Pde4d	-3.20531	1.86624	-1.88686	0.0788718	0.802959	-4.48624
Rictor	-1.05574	5.64437	-1.8868	0.0788809	0.802959	-4.2812
Scaf1	-3.48932	2.36688	-1.88659	0.0789116	0.802959	-4.4772
Zfp775	3.9202	-1.8848	1.88454	0.0792042	0.802959	-4.44935
Sdhc	-2.34901	5.35298	-1.88445	0.0792167	0.802959	-4.31122
Ncoa7	-3.50147	0.0215103	-1.88417	0.0792581	0.802959	-4.49681
Sirt3	-2.3744	1.0581	-1.88381	0.0793087	0.802959	-4.49517
Gtf3c2	1.65773	6.80364	1.88373	0.0793214	0.802959	-4.15859
Ebp	2.44088	3.35174	1.88334	0.079377	0.802959	-4.44777
Rbks	3.67225	0.0355193	1.88324	0.0793912	0.802959	-4.49697
Itgax	-2.91076	-2.34326	-1.8831	0.0794106	0.802959	-4.41997
Snx12	2.15015	5.42767	1.88299	0.0794265	0.802959	-4.30457
Abi3	0.691848	8.31654	1.88218	0.079543	0.802959	-4.04956
Ppp1r18	-1.43358	6.76129	-1.88183	0.0795944	0.802959	-4.16434
Paqr4	-4.63079	0.660275	-1.87961	0.0799143	0.802959	-4.49753
C030039L03Rik	-3.76677	-2.36577	-1.87845	0.0800818	0.802959	-4.41942
Cenpo	3.28948	2.61401	1.87783	0.0801718	0.802959	-4.47278
B3gnt8	3.6332	-2.25294	1.87782	0.0801729	0.802959	-4.42762
Mpg	-4.52133	1.52941	-1.87638	0.0803831	0.802959	-4.49205
Brk1	0.987755	6.99375	1.87619	0.0804103	0.802959	-4.14435
Kat6b	3.00207	4.27217	1.87594	0.0804471	0.802959	-4.40163
Ppp1r21	1.38167	7.34911	1.87573	0.0804765	0.802959	-4.11119
Rps11	-0.530752	6.81158	-1.87567	0.0804862	0.802959	-4.16323
Cyth3	1.99509	4.94143	1.87432	0.0806821	0.802959	-4.35221
Morf4l1	1.13112	6.48061	1.87419	0.0807007	0.802959	-4.19903
Slc25a27	-3.17654	-1.38956	-1.87382	0.0807556	0.802959	-4.47594
Klhl18	-2.34481	4.78915	-1.87377	0.0807627	0.802959	-4.3649
Trnau1ap	-3.59452	-1.50741	-1.87268	0.0809214	0.802959	-4.47103
Cad	-2.86366	1.98814	-1.8724	0.080963	0.802959	-4.48643
Cyp20a1	-4.80269	-0.318073	-1.8714	0.0811085	0.802959	-4.49694
Bin2	-0.868189	9.08867	-1.87125	0.0811316	0.802959	-4.08999
Zrsr2	-1.44945	5.22616	-1.8708	0.081197	0.802959	-4.32846
Trappc12	2.13864	5.16989	1.87026	0.0812763	0.802959	-4.33375
Hnrnpc	1.04562	6.19557	1.86954	0.0813827	0.802959	-4.23199
2610002M06Rik	2.94561	2.854	1.86929	0.0814184	0.802959	-4.46765
Rps2	-1.06009	6.8326	-1.86886	0.0814823	0.802959	-4.16572
Atxn7l1	2.40581	5.00488	1.86872	0.081502	0.802959	-4.34876
Dusp28	-2.49621	-2.7322	-1.86787	0.0816282	0.802959	-4.39266
Uvssa	1.33665	5.67612	1.86743	0.0816931	0.802959	-4.2867
Supv3l1	-3.63708	1.44554	-1.86722	0.081723	0.802959	-4.49418
C330021F23Rik	-1.04327	-0.647651	-1.86717	0.0817303	0.802959	-4.49495
Itgae	-4.43547	1.78704	-1.86686	0.0817769	0.802959	-4.49022
Mto1	-2.52134	3.26428	-1.8665	0.08183	0.802959	-4.45447
Spef2	-1.70395	-3.46777	-1.86643	0.0818396	0.802959	-4.31576
Thop1	-3.80447	-1.32187	-1.86638	0.0818468	0.802959	-4.47991
Tmem134	-2.10207	3.4936	-1.86634	0.0818533	0.802959	-4.4453
Dtx3l	0.885064	6.15081	1.86598	0.0819073	0.802959	-4.23864
Phf10	-1.94804	3.87811	-1.86539	0.0819934	0.802959	-4.42727
Abhd8	-3.93344	-0.822306	-1.86469	0.082097	0.802959	-4.49311
Psmf1	3.21712	2.9415	1.86427	0.0821592	0.802959	-4.46587
4930479D17Rik	-3.09356	-2.75983	-1.86397	0.0822046	0.802959	-4.39134
Dnajc24	2.99508	2.59329	1.86352	0.0822705	0.802959	-4.47561
Brms1l	-3.68826	1.96327	-1.86318	0.0823208	0.802959	-4.48815
Cers4	3.03653	-2.66023	1.86266	0.0823984	0.802959	-4.40026
Dtnb	-3.34561	-1.60938	-1.86213	0.0824774	0.802959	-4.468
Rrbp1	-0.503689	9.48105	-1.86185	0.0825188	0.802959	-4.1538
Zc3h12c	1.17319	5.76069	1.86162	0.082553	0.802959	-4.28088
Csad	-1.28683	5.2198	-1.86053	0.0827151	0.802959	-4.33293
Zfp382	3.09416	-1.23112	1.86019	0.0827658	0.802959	-4.48386
Cntn5	2.77211	-3.82302	1.86013	0.0827747	0.802959	-4.27151
Htr2b	4.0691	-0.821124	1.85975	0.0828314	0.802959	-4.49381
Ubtf	-1.63562	5.46672	-1.85939	0.0828857	0.802959	-4.31059
Armcx5	-3.39365	-0.184751	-1.85834	0.0830434	0.802959	-4.49935
Nup50	-2.90368	4.62485	-1.85823	0.0830586	0.802959	-4.38231
Cnksr2	-2.67514	-3.33836	-1.85818	0.0830666	0.802959	-4.33449
Set	-1.13438	6.23772	-1.85758	0.0831562	0.802959	-4.23418
Gm19710	2.83807	-2.77453	1.85725	0.0832061	0.802959	-4.39197
Ppif	-3.47517	-1.3325	-1.85717	0.083218	0.802959	-4.48092
Pigb	-3.7622	1.35324	-1.85695	0.0832514	0.802959	-4.49644
Meis3	2.69992	4.56098	1.85694	0.0832521	0.802959	-4.38731
Rgp1	-3.0301	4.20948	-1.85631	0.0833463	0.802959	-4.41071
Golga3	1.97123	4.21389	1.85582	0.08342	0.802959	-4.41057
Spata5l1	-2.16771	-3.08289	-1.85447	0.0836238	0.802959	-4.36356
Relb	4.1227	-0.564171	1.85427	0.0836544	0.802959	-4.49743
Cml1	-3.63477	-2.45044	-1.85301	0.083844	0.802959	-4.41932
Bcl2l13	2.34921	3.58633	1.85147	0.0840763	0.802959	-4.44435
Xdh	2.62949	-3.84864	1.85018	0.0842714	0.802959	-4.27312
D030028A08Rik	-3.1942	2.58458	-1.85016	0.084274	0.802959	-4.47798
Cnst	2.99705	3.42048	1.84894	0.0844599	0.802959	-4.45182
Tlk2	1.31355	5.65174	1.8487	0.0844958	0.802959	-4.29749
Ogfod1	-2.3351	5.14425	-1.84849	0.0845279	0.802959	-4.34405
Hspbp1	3.47345	-0.584196	1.84849	0.0845281	0.802959	-4.49802
Naa40	3.71146	1.41442	1.84816	0.0845785	0.802959	-4.49706
Pcdhb19	3.10532	-3.67071	1.8469	0.0847701	0.802959	-4.29821
Dolpp1	-3.29497	2.18501	-1.84675	0.0847927	0.802959	-4.48685
Slc22a13b-ps	-1.42431	-3.78587	-1.84657	0.0848208	0.802959	-4.28304
Rab7	1.08045	7.92577	1.84652	0.084828	0.802959	-4.09752
Lrrc29	-3.79111	-0.654057	-1.84549	0.0849845	0.802959	-4.4978
Nicn1	3.66887	-0.594188	1.84529	0.0850166	0.802959	-4.49836
Map3k13	-3.12124	-2.78614	-1.84488	0.0850793	0.802959	-4.3945
Srpk1	3.67405	3.39479	1.84483	0.0850854	0.802959	-4.45365
Sigmar1	-4.52147	0.815327	-1.84459	0.0851223	0.802959	-4.50152
Lrrc16a	-3.58647	1.24275	-1.84397	0.0852179	0.802959	-4.49909
Hexa	-0.550887	8.46281	-1.84388	0.0852316	0.802959	-4.09007
Emc4	-1.41417	4.95438	-1.84287	0.0853869	0.802959	-4.36186
Rgag4	-3.66379	-1.71763	-1.84286	0.0853881	0.802959	-4.46608
Gm11127	0.757052	-3.92936	1.84243	0.0854531	0.802959	-4.26776
Ccl27b	-2.26443	-2.74995	-1.84235	0.0854665	0.802959	-4.39833
Gm13306	-2.26443	-2.74995	-1.84235	0.0854665	0.802959	-4.39833
LOC100861978	-2.26443	-2.74995	-1.84235	0.0854665	0.802959	-4.39833
Mier2	-2.29833	3.60604	-1.84226	0.0854807	0.802959	-4.44542
Dync2h1	-3.20567	3.30973	-1.84215	0.0854964	0.802959	-4.45744
Zfp770	1.77803	5.34464	1.84203	0.0855146	0.802959	-4.32889
Crbn	0.989727	5.88391	1.84186	0.085542	0.802959	-4.27808
Cbr1	3.46473	2.59804	1.84114	0.0856517	0.802959	-4.47912
Traf3ip3	-2.95457	3.91297	-1.84003	0.0858236	0.802959	-4.43134
Gm4788	0.820429	-4.01794	1.83992	0.0858403	0.802959	-4.26126
Imp4	-1.8876	4.45289	-1.83964	0.0858829	0.802959	-4.39972
Ccbl2	-2.66569	-0.268602	-1.83933	0.0859315	0.802959	-4.50141
Tnpo1	-1.04	7.05244	-1.83909	0.0859682	0.802959	-4.16571
Zdhhc8	-1.6733	4.39758	-1.83855	0.0860513	0.802959	-4.40365
Fzr1	-4.17298	1.1961	-1.8374	0.0862288	0.802959	-4.50032
Yars	-3.07657	3.93122	-1.83554	0.0865173	0.802959	-4.43145
Bet1	3.234	0.818104	1.83429	0.0867111	0.802959	-4.50283
Pilra	-1.84301	4.27669	-1.83418	0.0867289	0.802959	-4.4124
Pbld2	2.90196	-3.70974	1.83377	0.0867917	0.802959	-4.29905
Fam53b	-1.44218	6.21149	-1.83344	0.0868437	0.802959	-4.25013
9030624J02Rik	-0.985505	5.71628	-1.83241	0.0870047	0.802959	-4.29868
Gtf2h1	2.49382	3.59453	1.83136	0.0871684	0.802959	-4.44821
Gm3020	-3.45107	-2.06464	-1.83047	0.0873079	0.802959	-4.44985
Ube2i	0.801911	7.3349	1.83	0.0873812	0.802959	-4.149
Icam1	1.18099	5.82885	1.82946	0.0874652	0.802959	-4.28936
Ap4b1	-1.87865	2.8346	-1.82914	0.0875149	0.802959	-4.47506
Rad9a	-1.68828	4.32056	-1.82866	0.0875913	0.802959	-4.4112
Purb	0.665732	7.79994	1.82836	0.0876377	0.802959	-4.12033
Abhd11	-3.81595	1.49436	-1.82751	0.0877709	0.802959	-4.49906
Msra	3.66743	-1.13217	1.82719	0.0878215	0.802959	-4.49167
Lifr	1.18067	8.2749	1.82679	0.0878851	0.802959	-4.10778
Pak7	2.39312	-3.80054	1.82645	0.0879386	0.802959	-4.29062
Cyp27a1	-2.33989	4.69809	-1.82584	0.0880341	0.802959	-4.38687
Ahdc1	-3.16342	3.40896	-1.8255	0.0880884	0.802959	-4.45694
Manea	1.50261	5.01262	1.82531	0.0881185	0.802959	-4.36324
Srsf2	0.520909	8.71163	1.82528	0.0881224	0.802959	-4.11793
Eml4	1.39808	6.5158	1.8239	0.0883403	0.802959	-4.22602
Mmp14	-2.60315	3.04969	-1.82331	0.0884342	0.802959	-4.46981
Fam170b	2.32733	-3.90148	1.82217	0.0886148	0.802959	-4.28057
Arih1	1.08839	6.70603	1.82206	0.0886313	0.802959	-4.2092
Hes1	-2.76524	-1.94513	-1.82202	0.0886381	0.802959	-4.45824
Pcnp	1.35159	6.23651	1.82154	0.0887141	0.802959	-4.25422
A630066F11Rik	2.82697	-2.54656	1.821	0.0888005	0.802959	-4.42025
Uchl4	-4.01195	-1.19026	-1.8197	0.0890068	0.802959	-4.49113
0610038B21Rik	-2.00697	-3.77183	-1.81946	0.0890443	0.802959	-4.29764
E130311K13Rik	3.7223	0.439948	1.81939	0.0890556	0.802959	-4.50559
Toe1	-2.94087	0.0605584	-1.81845	0.0892064	0.802959	-4.50535
2410004B18Rik	2.86117	1.30181	1.81844	0.0892073	0.802959	-4.502
Eea1	1.96244	5.87486	1.81788	0.0892968	0.802959	-4.29056
Rpl5	-0.845963	8.18776	-1.81772	0.0893227	0.802959	-4.11789
Zfp772	3.12797	3.60032	1.81751	0.0893558	0.802959	-4.45087
Tmem70	-3.15854	2.97213	-1.8167	0.0894847	0.802959	-4.4733
Mcf2l	2.7335	-3.33658	1.81666	0.0894915	0.802959	-4.35029
Fate1	2.29172	-3.90657	1.81558	0.0896647	0.802959	-4.28338
Ugcg	-1.34607	6.39382	-1.81523	0.0897209	0.802959	-4.24277
Mtch2	-2.65382	4.19039	-1.81395	0.0899263	0.802959	-4.42271
Snupn	4.05905	0.343032	1.81383	0.0899456	0.802959	-4.50632
Eif1ax	3.48401	0.720843	1.81365	0.0899741	0.802959	-4.50581
Bcl7c	3.0581	-1.18209	1.81338	0.090017	0.802959	-4.4923
Gtf2b	-2.42607	3.30986	-1.81302	0.0900754	0.802959	-4.46305
Zfp948	-3.06037	-2.35719	-1.81283	0.0901062	0.802959	-4.43557
Bcl6	2.50321	3.68258	1.81251	0.0901569	0.802959	-4.44842
Hipk2	1.50111	5.64389	1.81232	0.0901889	0.802959	-4.31437
Phf3	-0.639891	7.62683	-1.81194	0.0902493	0.802959	-4.14419
Dap3	3.23193	2.46699	1.81125	0.0903607	0.802959	-4.48682
Flrt1	2.21682	-3.1414	1.81099	0.0904031	0.802959	-4.37234
D630041G03Rik	2.55639	-2.58144	1.81073	0.0904444	0.802959	-4.42031
Lrrc57	-3.49579	2.1608	-1.81056	0.0904719	0.802959	-4.49264
Azi2	1.26975	6.06846	1.81022	0.0905273	0.802959	-4.27623
Sdf2l1	2.31778	3.8237	1.81016	0.0905371	0.802959	-4.44255
Rnf126	-2.69732	3.3045	-1.80973	0.0906061	0.802959	-4.46387
Klhl25	-3.59605	0.683985	-1.80898	0.0907281	0.802959	-4.50651
Stk38l	3.50012	0.194455	1.80761	0.09095	0.802959	-4.50699
Rad50	1.26595	6.57619	1.80748	0.0909701	0.802959	-4.23042
Hdac10	-3.61379	2.81861	-1.80713	0.0910272	0.802959	-4.47921
Id2	3.78296	0.66477	1.80701	0.091046	0.802959	-4.50681
Snhg7	-3.21488	1.28472	-1.80632	0.0911591	0.802959	-4.50373
9430091E24Rik	3.31409	-0.185256	1.80629	0.091164	0.802959	-4.50607
Slc2a5	-0.661666	8.19695	-1.80603	0.0912061	0.802959	-4.12953
Il22ra2	2.24069	-3.9139	1.80596	0.0912175	0.802959	-4.2875
Gm20300	2.90006	3.85323	1.80555	0.0912842	0.802959	-4.4422
Hdac9	3.00838	1.99122	1.80544	0.0913023	0.802959	-4.49605
Sema6b	-3.15839	-2.22896	-1.80475	0.0914141	0.802959	-4.44558
Brwd1	0.937147	7.81357	1.80468	0.0914259	0.802959	-4.14122
Vdac1	-1.64808	5.18653	-1.80434	0.0914807	0.802959	-4.35679
AI467606	3.04454	3.18591	1.80397	0.0915409	0.802959	-4.46898
2010109I03Rik	4.06539	-1.36691	1.80384	0.0915633	0.802959	-4.4879
Nabp2	3.64834	3.22875	1.8025	0.091782	0.802959	-4.46784
Hcn3	2.05253	-3.12399	1.80145	0.0919529	0.802959	-4.37723
Mgea5	-1.33668	7.67874	-1.80086	0.092051	0.802959	-4.15099
Gm14306	-1.90197	-2.39669	-1.80076	0.0920667	0.802959	-4.43579
Cdt1	-4.08691	-0.924852	-1.80071	0.0920742	0.802959	-4.50013
Lrp12	-3.16909	2.84703	-1.80052	0.0921057	0.802959	-4.4796
Tex10	3.10432	2.60803	1.80029	0.0921434	0.802959	-4.48548
Klhl35	1.61545	-3.50091	1.79981	0.092223	0.802959	-4.33879
Leprel1	1.29659	7.03524	1.7998	0.092225	0.802959	-4.19562
Pitrm1	2.3793	3.88897	1.79955	0.0922649	0.802959	-4.44189
Nit1	4.03557	1.31434	1.79811	0.0925026	0.802959	-4.50459
Soga1	0.420295	11.0882	1.79645	0.0927755	0.802959	-4.81236
Frmd7	-1.7008	-3.12507	-1.79641	0.0927821	0.802959	-4.37882
Hmgn5	-2.97232	-2.38881	-1.7949	0.0930324	0.802959	-4.43771
Eef1b2	1.40378	5.99549	1.79485	0.0930407	0.802959	-4.29076
Tmem5	-4.02718	1.23466	-1.79401	0.0931792	0.802959	-4.50573
Mrps33	3.14192	4.21201	1.79385	0.093206	0.802959	-4.42664
Tmod1	3.64079	2.12801	1.79334	0.0932911	0.802959	-4.49571
Eif2b2	4.05949	0.753146	1.79288	0.0933678	0.802959	-4.50837
Dffb	-3.92414	-1.11614	-1.79235	0.0934543	0.802959	-4.49717
Ube2d1	-3.63366	3.70204	-1.79167	0.0935688	0.802959	-4.45207
Grpel1	3.10444	1.99182	1.79066	0.0937356	0.802959	-4.49817
Ttf1	-3.03999	3.75501	-1.78965	0.0939051	0.802959	-4.45021
Galt	-3.69437	1.83802	-1.78799	0.0941815	0.802959	-4.50063
Ccr3	-3.39024	-2.03006	-1.78767	0.0942361	0.802959	-4.46056
Mvk	-2.93139	-1.03279	-1.78764	0.0942408	0.802959	-4.49982
Heatr5b	-2.53203	4.8407	-1.78722	0.0943112	0.802959	-4.38891
Ctc1	-0.952234	6.63918	-1.78595	0.0945242	0.802959	-4.23824
Chka	3.09549	4.23966	1.78574	0.09456	0.802959	-4.4272
Zfp341	3.26745	-2.04579	1.78467	0.0947395	0.802959	-4.46033
Rap1gap2	-2.9675	3.05074	-1.78464	0.0947435	0.802959	-4.47669
Fut11	3.17865	3.6377	1.78462	0.0947477	0.802959	-4.45624
Tapbp	-1.19389	6.96519	-1.78459	0.094753	0.802959	-4.21203
Slc16a7	2.25559	4.12882	1.78343	0.0949479	0.802959	-4.43375
Slc7a6	3.48254	2.47228	1.78342	0.0949492	0.802959	-4.49105
Ubxn6	-1.66861	4.49968	-1.78339	0.0949552	0.802959	-4.41263
Fxn	-3.50032	-2.84465	-1.78216	0.0951616	0.802959	-4.40779
H2-T10	-2.06	-3.36831	-1.78176	0.0952297	0.802959	-4.36008
Hist1h2ad	-2.60395	-2.95408	-1.78134	0.0953014	0.802959	-4.39899
Foxm1	3.71095	-1.54709	1.7805	0.0954428	0.802959	-4.48467
2810468N07Rik	2.48341	-2.64799	1.78021	0.095492	0.802959	-4.42344
Abhd12	0.514373	9.02952	1.77984	0.0955554	0.802959	-4.1954
Sec24a	-1.2862	5.21992	-1.77975	0.0955699	0.802959	-4.36328
Nfatc2ip	3.54336	1.376	1.77963	0.0955901	0.802959	-4.50655
Epb4.1l1	3.93877	-0.813269	1.77951	0.095611	0.802959	-4.50485
E230029C05Rik	0.975048	6.62575	1.77935	0.0956375	0.802959	-4.24352
Dcxr	-2.98726	1.55565	-1.77924	0.0956557	0.802959	-4.50497
Raf1	1.66575	4.37781	1.77899	0.0956988	0.802959	-4.42115
Apbb3	-2.90294	1.44807	-1.77896	0.0957032	0.802959	-4.50602
Pik3ip1	3.61062	0.136184	1.77879	0.0957331	0.802959	-4.51056
Bag2	-2.5412	-3.31191	-1.77851	0.09578	0.802959	-4.36698
Camkv	-1.41681	-3.65503	-1.77713	0.0960145	0.802959	-4.33089
Ccnt2	1.34813	5.11306	1.77668	0.0960919	0.802959	-4.37259
Mzt2	-3.38906	2.9588	-1.77642	0.0961354	0.802959	-4.48072
Rplp2	-0.686979	7.61485	-1.77589	0.0962269	0.802959	-4.17574
Zfand1	3.71832	1.53461	1.77522	0.0963401	0.802959	-4.50572
Tbc1d22b	-3.68391	-0.420386	-1.77518	0.0963475	0.802959	-4.50886
Gm8979	1.82909	-3.59173	1.7748	0.0964117	0.802959	-4.33901
Uqcrh	3.17637	3.79965	1.77469	0.0964315	0.802959	-4.45155
Copg2	2.33473	4.26009	1.77162	0.0969569	0.802959	-4.42973
Plcb4	2.71794	-2.14365	1.77156	0.0969665	0.802959	-4.45777
Sh3bp2	1.68896	5.53648	1.77154	0.0969698	0.802959	-4.34116
Trim68	-3.35858	0.0684811	-1.77148	0.0969813	0.802959	-4.51133
Trim30a	0.709952	6.83464	1.7714	0.0969942	0.802959	-4.23143
Egfl8	-2.41676	-2.20468	-1.77105	0.0970555	0.802959	-4.45443
Trp53i13	3.56391	-0.512705	1.77061	0.0971306	0.802959	-4.50885
Sec16b	4.06337	0.368359	1.7705	0.0971484	0.802959	-4.5118
Dek	-0.995422	6.20267	-1.77033	0.0971776	0.802959	-4.28516
Sp3	1.03921	6.65922	1.76974	0.0972803	0.802959	-4.24675
Fgfrl1	-2.66604	-2.87097	-1.76951	0.0973204	0.802959	-4.4094
Rest	-2.27829	4.52745	-1.76944	0.097332	0.802959	-4.41491
Gm19395	-2.48538	-2.61419	-1.7692	0.0973738	0.802959	-4.42877
Ptpmt1	2.73448	2.98298	1.76844	0.0975038	0.802959	-4.48145
Rsu1	0.930875	6.52652	1.76833	0.0975227	0.802959	-4.25867
Rpl4	0.614461	8.08702	1.76816	0.0975532	0.802959	-4.16797
Mink1	3.11239	3.71935	1.76804	0.0975726	0.802959	-4.45643
Fam117a	-4.36768	0.76456	-1.76766	0.0976392	0.802959	-4.51154
Lrrc1	3.06874	-2.4028	1.76764	0.0976413	0.802959	-4.44328
Cd86	0.9199	7.7999	1.76725	0.0977101	0.802959	-4.17548
Ccr10	2.96023	-2.43822	1.76677	0.0977924	0.802959	-4.44123
Hist2h3c2	-1.63245	-2.37165	-1.76635	0.0978656	0.802959	-4.44555
4933433G15Rik	-1.60595	-3.79088	-1.76468	0.0981539	0.802959	-4.32088
Nmrk1	-3.57708	-0.537737	-1.76429	0.098223	0.802959	-4.50949
Phf23	-2.49964	4.07016	-1.76366	0.0983318	0.802959	-4.44156
Gm20597	2.02631	-3.94521	1.76293	0.0984587	0.802959	-4.30624
Abcb8	3.49729	2.29455	1.76276	0.0984875	0.802959	-4.4975
Pbx2	-2.94955	4.87878	-1.76221	0.0985848	0.802959	-4.39437
Slc46a3	1.80648	5.4902	1.76202	0.0986166	0.802959	-4.34887
Nup54	-3.55989	2.41583	-1.76159	0.0986928	0.802959	-4.49553
Mbnl1	0.394212	9.7103	1.76107	0.0987821	0.802959	-4.33356
Scube1	4.34774	-0.884002	1.76053	0.0988776	0.802959	-4.50637
Olfr101	-1.68672	-3.7424	-1.76048	0.0988857	0.802959	-4.32837
Camta2	-0.933803	7.46177	-1.76027	0.0989221	0.802959	-4.19665
Crip1	2.51712	-3.67043	1.76005	0.0989606	0.802959	-4.33663
A730008H23Rik	-4.27643	0.0918277	-1.75964	0.0990336	0.802959	-4.51288
Kcnd2	2.51251	-3.67127	1.75963	0.0990343	0.802959	-4.33672
Med22	1.68059	4.84088	1.75877	0.0991855	0.802959	-4.39805
Zbed3	2.59157	3.23886	1.75868	0.0992	0.802959	-4.47571
Hist1h1a	2.00682	-3.9481	1.75863	0.0992103	0.802959	-4.30817
Snx2	1.64081	6.7	1.75846	0.0992391	0.802959	-4.2506
Dyrk2	-2.1574	3.71954	-1.75807	0.0993076	0.802959	-4.45857
Zfp952	-2.94565	2.55548	-1.75799	0.0993224	0.802959	-4.49334
Lrrc14	-4.21377	0.484354	-1.7577	0.0993717	0.802959	-4.51335
BC052040	-3.74158	-1.11389	-1.75729	0.0994437	0.802959	-4.50228
Gm19557	3.46573	-1.32775	1.75678	0.0995336	0.802959	-4.49658
Amigo3	4.21881	-0.188667	1.75653	0.0995781	0.802959	-4.51242
Mrps12	-3.28711	-0.847993	-1.75631	0.0996159	0.802959	-4.50748
Lyn	0.72447	9.44185	1.75571	0.0997222	0.802959	-4.28465
Trhde	-1.77553	-3.74229	-1.75501	0.0998451	0.802959	-4.33087
Limk1	-2.96761	2.53405	-1.75423	0.099983	0.802959	-4.49437
Faim	3.48328	2.35493	1.75421	0.0999866	0.802959	-4.49774
Tnks2	0.755166	7.94026	1.75411	0.100004	0.802959	-4.18356
Mettl23	-2.49164	2.21174	-1.75341	0.100128	0.802959	-4.50027
Ubtd1	3.54233	2.21865	1.75337	0.100135	0.802959	-4.50017
Trove2	2.23434	3.95979	1.7527	0.100252	0.802959	-4.44939
Abhd17b	-2.03491	3.30516	-1.75205	0.100368	0.802959	-4.47485
Psmd5	-2.93511	3.17223	-1.75127	0.100507	0.802959	-4.47911
Prkce	2.34119	3.32762	1.75022	0.100692	0.802959	-4.47447
Adcy5	2.24359	-2.88782	1.75017	0.1007	0.802959	-4.41379
Dhrs7	3.33834	2.61081	1.74993	0.100745	0.802959	-4.49348
Galnt7	2.16357	3.97784	1.74959	0.100804	0.802959	-4.44929
Osbpl1a	2.66112	5.42915	1.74947	0.100826	0.802959	-4.35876
Svop	2.02034	-3.86615	1.74917	0.10088	0.802959	-4.32014
Ppm1a	2.8398	3.81877	1.7491	0.100892	0.802959	-4.45641
3110002H16Rik	3.74922	1.21569	1.74896	0.100917	0.802959	-4.51175
Med13	0.996469	8.59461	1.74666	0.101325	0.802959	-4.1994
Slc6a8	-4.47687	-0.191357	-1.74666	0.101325	0.802959	-4.51366
Ppp4r2	0.802709	6.01468	1.74533	0.101563	0.802959	-4.31389
Plcg2	-0.608133	7.2246	-1.74506	0.101612	0.802959	-4.22234
H1f0	1.37598	4.87359	1.74409	0.101785	0.802959	-4.4006
Arpp19	-1.42699	6.1143	-1.74392	0.101817	0.802959	-4.30651
Prkag3	-0.963005	-3.90398	-1.74387	0.101825	0.802959	-4.31899
Ppp2r2d	-2.48419	3.32425	-1.74382	0.101834	0.802959	-4.4758
Chd2	-0.736345	7.59021	-1.74374	0.101849	0.802959	-4.20403
AK010878	3.41111	1.83818	1.74271	0.102034	0.802959	-4.50694
Slc30a9	2.24846	5.03196	1.74225	0.102116	0.802959	-4.39052
Rab35	-2.64643	4.60217	-1.74203	0.102156	0.802959	-4.41832
2810403A07Rik	-1.55584	6.30794	-1.7415	0.10225	0.802959	-4.29214
Zfp715	0.639281	6.79445	1.74138	0.102272	0.802959	-4.25437
Slc31a2	-1.63354	5.9001	-1.7412	0.102304	0.802959	-4.32518
2610528A11Rik	-4.2146	0.388841	-1.74103	0.102334	0.802959	-4.51549
Rab3c	2.66719	-2.83851	1.7409	0.102359	0.802959	-4.42027
Dlgap3	-2.92305	-2.58461	-1.74022	0.102481	0.802959	-4.43831
Cib2	-3.26591	-1.51545	-1.73965	0.102584	0.802959	-4.49265
Chl1	-2.91505	-3.42418	-1.7396	0.102593	0.802959	-4.37056
Tsacc	2.70084	-2.20099	1.73955	0.102602	0.802959	-4.46147
Cdc123	1.79597	5.20679	1.7387	0.102755	0.802959	-4.37946
Ubr7	3.50618	2.73521	1.73839	0.102811	0.802959	-4.49266
Plekhg2	-3.4128	1.02358	-1.73829	0.10283	0.802959	-4.51423
Usp28	-2.96333	0.937043	-1.73816	0.102852	0.802959	-4.51464
Hectd1	0.977841	7.54991	1.73804	0.102875	0.802959	-4.21053
Trappc13	-2.79366	2.87146	-1.73787	0.102905	0.802959	-4.48958
Rimbp2	2.33396	-3.67887	1.73777	0.102924	0.802959	-4.34546
Tm7sf3	-1.39107	4.76874	-1.73765	0.102945	0.802959	-4.40941
Steap3	-2.65054	-2.52594	-1.73755	0.102963	0.802959	-4.44279
Lin54	2.54646	3.02999	1.73723	0.103022	0.802959	-4.48565
Paox	-3.93598	0.23868	-1.73699	0.103065	0.802959	-4.51593
Olfr111	3.43158	1.09526	1.73698	0.103067	0.802959	-4.51401
Tuba1c	-2.06378	2.91622	-1.7362	0.103208	0.802959	-4.48876
Sf3b6	3.0886	1.87521	1.73589	0.103264	0.802959	-4.50744
Dnajc13	-1.07723	6.8549	-1.73588	0.103266	0.802959	-4.25362
Gm1141	2.82254	-3.43588	1.73579	0.103282	0.802959	-4.3709
5830432E09Rik	-2.74804	-0.447924	-1.73489	0.103446	0.802959	-4.51391
Sh2d7	-2.17315	-3.06766	-1.73439	0.103537	0.802959	-4.40428
Prrg1	1.7318	-3.91487	1.73429	0.103556	0.802959	-4.32283
Hist1h2ag	-1.11641	-3.92521	-1.7336	0.10368	0.802959	-4.32236
Ifnar1	-1.4356	6.43804	-1.73349	0.103701	0.802959	-4.28639
Mrpl1	3.10308	1.0783	1.73319	0.103756	0.802959	-4.51459
Gnal	4.18997	1.29267	1.73285	0.103817	0.802959	-4.51331
Ddx1	-2.05346	4.45818	-1.73115	0.104128	0.802959	-4.42968
Ppa2	-3.3255	2.29508	-1.73008	0.104323	0.802959	-4.50238
Ica1l	-2.54625	3.51467	-1.73003	0.104332	0.802959	-4.47213
Alkbh3	4.23699	2.21358	1.73002	0.104334	0.802959	-4.50368
Drg2	-2.23931	2.43545	-1.72981	0.104372	0.802959	-4.50004
Tymp	2.11385	-2.9557	1.72961	0.104409	0.802959	-4.41471
Fut8	-1.85414	3.25595	-1.72785	0.104732	0.802959	-4.48094
Cfp	2.98456	-3.25967	1.72657	0.104967	0.802959	-4.39057
Nudcd2	2.62452	-1.17656	1.72655	0.10497	0.802959	-4.50516
Ctrl	-1.9282	-3.72835	-1.72593	0.105086	0.802959	-4.34548
Cep170	0.556886	8.04334	1.72571	0.105126	0.802959	-4.20882
Dnajc7	-0.602833	7.27342	-1.72554	0.105157	0.802959	-4.23423
Ei24	-3.19242	2.37132	-1.72545	0.105173	0.802959	-4.50181
Rnf146	3.69408	2.44184	1.72541	0.105181	0.802959	-4.5006
Anapc5	1.04572	5.92349	1.7249	0.105275	0.802959	-4.33114
Asah2	2.81403	1.96459	1.7239	0.10546	0.802959	-4.50802
Ficd	3.95213	0.935729	1.72387	0.105466	0.802959	-4.51646
Dennd5b	2.51823	-2.19576	1.72382	0.105475	0.802959	-4.46515
Alkbh6	2.5268	4.11676	1.72333	0.105566	0.802959	-4.44914
Polr3gl	2.36458	1.57176	1.72256	0.105709	0.802959	-4.51244
Wdr82	-1.57916	5.84975	-1.72218	0.105779	0.802959	-4.33811
Treml1	3.43453	0.408724	1.7221	0.105794	0.802959	-4.51785
Clint1	1.06941	7.0597	1.72151	0.105902	0.802959	-4.24977
Ska1	-2.56267	-3.50133	-1.72132	0.105937	0.802959	-4.37026
Rgs16	-1.15635	-3.7797	-1.72063	0.106065	0.802959	-4.34249
Gpr82	-3.60086	-0.0703933	-1.71994	0.106193	0.802959	-4.51748
Gpr137	-2.34185	3.48188	-1.71975	0.106229	0.802959	-4.4753
Slc39a6	-2.9145	3.01767	-1.71888	0.106392	0.802959	-4.48918
Lrpprc	0.929048	5.6698	1.71851	0.106459	0.802959	-4.35341
Chst7	2.57865	3.22085	1.71821	0.106517	0.802959	-4.48375
Cep350	0.745118	7.89057	1.71802	0.106551	0.802959	-4.21747
Tjp1	0.43522	9.40658	1.71796	0.106563	0.802959	-4.32575
Gm21119	-0.932501	-3.89531	-1.71789	0.106576	0.802959	-4.33234
Lyrm9	4.28367	1.97103	1.71716	0.106712	0.802959	-4.50889
Ccdc167	1.39543	5.04352	1.71515	0.107088	0.802959	-4.39905
Tlr7	0.518523	10.0396	1.71487	0.10714	0.802959	-4.48475
Spty2d1	-2.59799	4.99394	-1.71476	0.107161	0.802959	-4.40242
Bop1	3.59938	0.967376	1.71459	0.107192	0.802959	-4.51751
Tia1	-0.993054	6.14008	-1.71451	0.107207	0.802959	-4.31971
Rrp12	3.6432	-1.38865	1.71395	0.107312	0.802959	-4.50112
Tor1a	2.27585	2.60521	1.71387	0.107328	0.802959	-4.49932
Arl1	2.38993	0.148793	1.71384	0.107333	0.802959	-4.51873
Panx2	1.67493	-3.68345	1.7136	0.107379	0.802959	-4.35554
Zfp493	3.48051	0.322339	1.71337	0.107423	0.802959	-4.51894
Kcns2	2.06305	-3.7139	1.71309	0.107474	0.802959	-4.35268
2610207O16Rik	-1.21856	-3.89001	-1.71302	0.107488	0.802959	-4.3352
Tmem237	3.24725	-0.916513	1.71246	0.107593	0.802959	-4.51239
Hps4	0.432845	7.90794	1.7122	0.107642	0.802959	-4.2225
D2Wsu81e	2.89831	0.991876	1.7119	0.107699	0.802959	-4.51774
Slc39a14	-3.38775	1.56568	-1.71126	0.107819	0.802959	-4.514
Ly6e	0.617917	10.3628	1.71056	0.107951	0.802959	-4.60183
Fbxl21	-1.88602	-3.25427	-1.71035	0.10799	0.802959	-4.39674
Acyp1	-4.03461	0.0634024	-1.71021	0.108017	0.802959	-4.51902
Pdxdc1	-1.23386	5.60653	-1.71014	0.10803	0.802959	-4.36169
Cacfd1	3.73385	0.345615	1.70977	0.108099	0.802959	-4.5194
Ralgapb	1.06449	6.45599	1.70956	0.10814	0.802959	-4.29889
Sptssa	1.91789	4.28615	1.70951	0.108149	0.802959	-4.44445
Igsf10	3.02967	1.84817	1.70877	0.108288	0.802959	-4.51152
Rrm2	2.63021	-3.47539	1.70843	0.108352	0.802959	-4.3778
Rhob	0.371546	10.1203	1.70808	0.10842	0.802959	-4.51968
Gm9833	-2.09767	-2.66867	-1.70776	0.10848	0.802959	-4.44127
4931403G20Rik	2.22132	-3.6928	1.70689	0.108646	0.802959	-4.35754
Ncstn	-0.83471	6.22701	-1.70672	0.108677	0.802959	-4.31729
Arhgef40	-1.41278	6.34159	-1.70642	0.108733	0.802959	-4.30902
Sema4a	-3.39797	-0.98076	-1.70558	0.108895	0.802959	-4.51226
Orc4	1.51614	5.54809	1.70407	0.109181	0.802959	-4.36845
Fgfr1op	-2.91518	4.43847	-1.70391	0.109211	0.802959	-4.43821
Rab7l1	-3.94445	-0.662354	-1.70377	0.109238	0.802959	-4.51648
Uba2	1.72579	4.59563	1.70373	0.109247	0.802959	-4.42982
Erap1	-1.42449	5.7485	-1.70252	0.109476	0.802959	-4.35466
Meis1	-3.77291	0.485675	-1.70241	0.109497	0.802959	-4.52026
Ocln	-3.99893	-1.61186	-1.70232	0.109516	0.802959	-4.49518
Cntnap2	2.27603	-2.98413	1.70219	0.109539	0.802959	-4.42095
Ap5s1	-3.87298	0.918317	-1.70184	0.109606	0.802959	-4.51931
Acads	-2.52944	1.50554	-1.7017	0.109634	0.802959	-4.51578
Cenpj	-2.84566	1.96334	-1.70145	0.109681	0.802959	-4.51119
Cdk5rap1	3.05574	-0.33753	1.70129	0.109712	0.802959	-4.51879
Gabrg2	-1.12615	-3.88384	-1.70079	0.109808	0.802959	-4.34167
Chchd6	-3.49696	-2.52978	-1.69948	0.110059	0.802959	-4.45204
Fbxo17	-3.30022	-2.42921	-1.69907	0.110138	0.802959	-4.45798
Ints12	2.55908	4.43805	1.69902	0.110147	0.802959	-4.43957
1810026J23Rik	-3.98853	2.22788	-1.69884	0.110181	0.802959	-4.50804
Gm6793	3.20417	5.94339	1.69861	0.110226	0.802959	-4.34227
Taf8	-3.521	2.53589	-1.69737	0.110464	0.802959	-4.50321
Gls	-1.20704	6.9535	-1.6973	0.110478	0.802959	-4.27312
Traf3ip1	-3.83531	0.530092	-1.697	0.110535	0.802959	-4.52089
Prr14l	0.870818	7.75287	1.69607	0.110714	0.802959	-4.2394
Sema7a	-1.13315	-3.87811	-1.69484	0.110952	0.802959	-4.34504
Nolc1	-3.57459	1.95766	-1.69481	0.110958	0.802959	-4.51219
Ppp2cb	1.33944	5.31703	1.69422	0.111073	0.802959	-4.3884
Hist1h2ac	2.70072	-2.54742	1.69367	0.111178	0.802959	-4.45243
Ercc3	-1.51516	4.21984	-1.69356	0.1112	0.802959	-4.45169
Plekhb1	2.62275	-2.39898	1.69351	0.11121	0.802959	-4.46099
Usp22	2.38734	5.932	1.69338	0.111235	0.802959	-4.3456
Asb5	1.73256	-3.98953	1.69306	0.111296	0.802959	-4.33803
C77080	-1.32669	-3.8368	-1.69222	0.111459	0.802959	-4.35001
9630028B13Rik	1.74513	-3.912	1.69168	0.111564	0.802959	-4.34379
Stab1	0.535319	8.93961	1.69117	0.111664	0.802959	-4.28913
Mocs1	-3.2504	2.2156	-1.69073	0.111749	0.802959	-4.5094
Pdss2	-3.07462	-0.516039	-1.68995	0.1119	0.802959	-4.51927
Wiz	2.40372	3.91956	1.68968	0.111953	0.802959	-4.46559
Zfp759	-2.72231	1.65295	-1.68903	0.112079	0.802959	-4.51619
Cmklr1	-0.873107	7.81744	-1.6887	0.112144	0.802959	-4.24469
1700020N01Rik	3.06484	-2.39228	1.68779	0.112321	0.802959	-4.46269
Zfp143	-2.4201	2.55552	-1.68757	0.112364	0.802959	-4.50437
Nbeal1	1.7451	6.10198	1.68709	0.112459	0.802959	-4.33656
Sbsn	1.97994	-2.69049	1.68609	0.112654	0.802959	-4.44564
Mbip	1.85397	3.48928	1.68608	0.112655	0.802959	-4.48172
Zfp687	2.84579	4.00827	1.68469	0.112928	0.802959	-4.46312
Stxbp3a	-1.48444	4.76076	-1.68458	0.112949	0.802959	-4.42625
Adam18	-1.87965	-2.90043	-1.6839	0.113083	0.802959	-4.43243
Abhd1	-3.21555	-0.922625	-1.68383	0.113097	0.802959	-4.51617
Luc7l3	0.695833	8.2342	1.68287	0.113285	0.802959	-4.25177
Tssk6	1.99259	-3.75279	1.68253	0.113353	0.802959	-4.36246
Zfyve28	-2.05134	-2.93647	-1.68157	0.113542	0.802959	-4.43062
Cpne9	-0.56483	-4.148	-1.68125	0.113605	0.802959	-4.33503
Usp11	-2.22405	4.33669	-1.68056	0.113742	0.802959	-4.44953
Gm5595	2.05757	1.08149	1.68052	0.113749	0.802959	-4.52128
Cyp2j6	-0.708016	-4.10706	-1.68025	0.113801	0.802959	-4.33779
Slc5a11	-0.708016	-4.10706	-1.68025	0.113801	0.802959	-4.33779
Fbxo46	-3.65309	-1.28733	-1.68015	0.113821	0.802959	-4.50928
Zfp280b	-3.74088	2.69496	-1.67976	0.113898	0.802959	-4.50298
Vps13d	0.752532	7.77871	1.6789	0.114069	0.802959	-4.2538
Arhgef12	1.66809	6.39078	1.67813	0.114222	0.802959	-4.32135
Ugdh	2.05934	3.58701	1.67777	0.114292	0.802959	-4.48022
1700048O20Rik	-1.89583	-3.55783	-1.67769	0.114309	0.802959	-4.38255
Zbtb20	1.72883	6.11486	1.67759	0.114329	0.802959	-4.34049
Rpa2	3.36178	-0.437305	1.6766	0.114524	0.802959	-4.52143
Chst8	3.63446	0.659402	1.67614	0.114616	0.802959	-4.52327
Fam83h	-2.66508	-2.47982	-1.67571	0.114701	0.802959	-4.46073
Kcnq2	1.91812	-3.86458	1.67518	0.114806	0.802959	-4.35557
Psme3	-1.42887	5.04928	-1.67513	0.114817	0.802959	-4.41237
Hist1h4m	1.9155	-3.86517	1.675	0.114844	0.802959	-4.35561
Sipa1l3	3.19225	3.7608	1.67493	0.114858	0.802959	-4.47484
Ppp1r7	-1.41547	5.41941	-1.67455	0.114934	0.802959	-4.38919
5031426D15Rik	2.58904	-3.52915	1.67399	0.115044	0.802959	-4.38657
Anxa4	-3.34516	1.67589	-1.67372	0.115099	0.802959	-4.51803
Kcnk13	-2.34914	3.03507	-1.67355	0.115133	0.802959	-4.49663
Pde6g	-1.39836	-3.83286	-1.67338	0.115166	0.802959	-4.35915
Pou5f2	3.30876	0.615324	1.6731	0.115221	0.802959	-4.52373
Hhex	-0.991554	6.70276	-1.6728	0.115283	0.802959	-4.30437
Asun	3.21741	1.54825	1.67244	0.115354	0.802959	-4.51929
Twf1	1.14626	5.61754	1.67239	0.115364	0.802959	-4.37692
Tmem170	2.52164	-2.53417	1.67227	0.115387	0.802959	-4.45852
1700017B05Rik	0.613731	9.18455	1.6722	0.115402	0.802959	-4.34383
Eif4g1	-0.758833	7.03154	-1.67213	0.115415	0.802959	-4.286
Mmp23	-3.05144	-0.875826	-1.67097	0.115647	0.802959	-4.51857
Dynlrb1	-1.44062	4.55248	-1.67096	0.115651	0.802959	-4.44147
Fam92a	2.41054	-2.3703	1.67074	0.115694	0.802959	-4.4678
Abhd13	1.37342	5.53628	1.67061	0.11572	0.802959	-4.38307
Olfr110	3.41603	-1.89046	1.67052	0.115738	0.802959	-4.48992
Scn1b	-2.23563	3.82087	-1.67052	0.115738	0.802959	-4.47361
Ints2	2.20848	3.02675	1.66965	0.115912	0.802959	-4.4975
1810037I17Rik	2.74607	2.84102	1.66938	0.115967	0.802959	-4.5017
Neto2	1.79066	-3.81593	1.66885	0.116074	0.802959	-4.36269
Mfsd10	-2.25018	2.53298	-1.66843	0.116157	0.802959	-4.50773
Atcay	1.88539	-3.77465	1.66798	0.116249	0.802959	-4.36694
Ap3b2	-1.48154	-3.74875	-1.66722	0.116401	0.802959	-4.36967
Kcnj16	-3.10333	-2.52301	-1.66711	0.116424	0.802959	-4.46042
Plaa	1.47805	5.62036	1.66691	0.116463	0.802959	-4.37905
Xk	3.52892	1.78045	1.66626	0.116595	0.802959	-4.51805
Adamts13	-1.08387	-3.26977	-1.66615	0.116617	0.802959	-4.41097
Fam3c	2.68538	4.71379	1.66534	0.11678	0.802959	-4.43466
Atp6v0c	3.28657	3.24023	1.66462	0.116926	0.802959	-4.49304
Naprt1	-3.13719	-1.51008	-1.66457	0.116936	0.802959	-4.50498
Setd4	-3.16604	-1.60828	-1.66452	0.116947	0.802959	-4.50163
Tmem178b	1.75257	-3.9023	1.66398	0.117056	0.802959	-4.35778
Samd14	1.74921	-3.90314	1.66394	0.117064	0.802959	-4.35775
Nek9	1.76218	5.859	1.66356	0.117141	0.802959	-4.36467
Slc25a31	1.70947	-3.91295	1.66333	0.117186	0.802959	-4.3574
Dnm3	2.31597	-2.49952	1.66235	0.117386	0.802959	-4.46287
Eif6	2.85631	2.86396	1.66231	0.117393	0.802959	-4.50239
Gch1	-3.36656	-1.65325	-1.66196	0.117466	0.802959	-4.50047
Smim24	-2.73363	-2.53155	-1.66171	0.117516	0.802959	-4.46127
Athl1	-3.01987	0.365931	-1.66162	0.117534	0.802959	-4.52535
Cd79a	1.63106	-3.93215	1.66149	0.117559	0.802959	-4.35703
Smc5	-1.3749	5.54524	-1.66086	0.117689	0.802959	-4.38647
Kif3c	-3.05567	2.67676	-1.66015	0.117833	0.802959	-4.50646
Spaca6	-2.91146	-2.29383	-1.66014	0.117835	0.802959	-4.47405
Aqr	1.23555	5.80134	1.65974	0.117915	0.802959	-4.37022
Sema5b	1.60712	-4.00897	1.65923	0.11802	0.802959	-4.35364
Prr11	-2.37268	-2.06041	-1.65851	0.118167	0.802959	-4.48514
Hpx	1.65811	-3.82878	1.65778	0.118315	0.802959	-4.36672
Gm10791	1.01533	-3.86304	1.65751	0.11837	0.802959	-4.36402
Arhgef18	-2.10455	4.63202	-1.657	0.118476	0.802959	-4.44139
Ermp1	2.70656	5.27788	1.65697	0.118482	0.802959	-4.40487
Irf9	2.09346	4.85806	1.65683	0.118509	0.802959	-4.42943
Kcnn4	2.20101	-3.66453	1.65673	0.118531	0.802959	-4.3818
Pfn2	-3.71825	1.9175	-1.65626	0.118627	0.802959	-4.51799
Gins2	-3.26255	-0.778563	-1.65577	0.118727	0.802959	-4.52174
2610008E11Rik	2.31185	4.4909	1.65495	0.118895	0.802959	-4.44898
Slc12a9	1.90279	5.94901	1.65434	0.119021	0.802959	-4.36305
She	3.84469	-0.254091	1.65425	0.119039	0.802959	-4.52508
Abhd16a	-3.13534	2.23666	-1.65394	0.119103	0.802959	-4.51446
Clec4a1	3.71903	-1.32973	1.65387	0.119117	0.802959	-4.51208
Spef1	-1.48895	-3.80761	-1.65374	0.119143	0.802959	-4.37039
Mlc1	1.88226	-3.74039	1.6534	0.119213	0.802959	-4.37655
Tuba1a	-1.12902	6.83319	-1.65279	0.119339	0.802959	-4.30952
Gtf3a	-1.47983	4.42033	-1.65265	0.119367	0.802959	-4.45295
Ppard	1.68538	5.18979	1.65243	0.119413	0.802959	-4.41184
Npepl1	1.78941	5.28223	1.65243	0.119413	0.802959	-4.40628
Pim3	3.06245	-1.64107	1.65216	0.11947	0.802959	-4.50255
Aurka	1.47348	-3.96994	1.65209	0.119483	0.802959	-4.35937
Nanos3	1.47348	-3.96994	1.65209	0.119483	0.802959	-4.35937
Jade2	2.02983	7.0311	1.65193	0.119515	0.802959	-4.29998
Abcc10	2.97269	1.41704	1.65167	0.119571	0.802959	-4.523
Mylip	1.06708	7.069	1.65166	0.119572	0.802959	-4.29838
Snrpb2	2.0235	3.93779	1.64975	0.119966	0.802959	-4.4739
C030037D09Rik	-2.69881	-3.31095	-1.64878	0.120166	0.802959	-4.41391
Mctp1	1.32296	4.4408	1.64877	0.120169	0.802959	-4.45303
2810029C07Rik	2.10997	-3.78152	1.64875	0.120172	0.802959	-4.37498
Timm17a	2.66761	3.76883	1.64868	0.120187	0.802959	-4.48017
Fndc4	-2.84068	-2.2764	-1.64866	0.120191	0.802959	-4.47741
Cd300lh	3.25148	-2.68592	1.64857	0.12021	0.802959	-4.45585
1600023N17Rik	-2.81798	-3.45472	-1.64794	0.120341	0.802959	-4.40297
Sdccag8	0.873759	5.48209	1.6476	0.120412	0.802959	-4.39585
Rab4a	2.89896	-2.04035	1.64727	0.120481	0.802959	-4.48822
Nkx6-2	1.41784	-3.98309	1.64718	0.120499	0.802959	-4.36104
Zfp518a	1.07843	6.65916	1.64679	0.120579	0.802959	-4.32296
Matr3	1.11512	6.51951	1.64666	0.120606	0.802959	-4.33116
5830454E08Rik	-2.55378	-2.18986	-1.64643	0.120653	0.802959	-4.48191
Tsg101	1.2126	4.54478	1.64632	0.120677	0.802959	-4.44877
Armcx2	-3.3272	1.40551	-1.64613	0.120717	0.802959	-4.5238
Alkbh1	1.45497	5.64701	1.64575	0.120795	0.802959	-4.38629
Vac14	1.75703	4.82483	1.64546	0.120857	0.802959	-4.43479
4930539J05Rik	-1.70925	-3.72537	-1.64461	0.121033	0.802959	-4.38173
Bcat1	2.82775	-2.45053	1.64448	0.121059	0.802959	-4.46975
Slc22a21	-3.02612	-2.04182	-1.64408	0.121143	0.802959	-4.48879
Prr5l	-3.20131	0.456795	-1.64379	0.121203	0.802959	-4.52751
Ddx20	3.72966	0.0394296	1.64265	0.121442	0.802959	-4.52735
1110059E24Rik	-3.1424	1.06734	-1.64265	0.121442	0.802959	-4.52612
Apool	-3.00527	0.46732	-1.64251	0.12147	0.802959	-4.52766
Prkacb	0.78251	6.15853	1.64238	0.121497	0.802959	-4.35557
Ttll3	-1.66222	4.91701	-1.64233	0.121509	0.802959	-4.43081
8030423F21Rik	2.48836	-3.17004	1.64228	0.121518	0.802959	-4.42651
Kcnh2	1.36884	-3.99462	1.64228	0.12152	0.802959	-4.3628
Mtg1	-3.00186	-0.523453	-1.64196	0.121585	0.802959	-4.52535
Pcyt2	-3.43872	1.22893	-1.64177	0.121625	0.802959	-4.52543
Zfp780b	3.40687	3.09676	1.6414	0.121704	0.802959	-4.50077
Gm13247	1.5433	-4.019	1.64074	0.121841	0.802959	-4.36224
Med9os	1.5433	-4.019	1.64074	0.121841	0.802959	-4.36224
Msi2	2.20256	5.10638	1.64072	0.121845	0.802959	-4.42081
Ncor2	0.937097	7.60817	1.64065	0.121861	0.802959	-4.28874
Rbm39	0.491767	8.59986	1.64038	0.121916	0.802959	-4.31285
Mier1	1.14782	5.03044	1.63999	0.121998	0.802959	-4.42534
Tsen2	-3.57395	-0.786567	-1.63983	0.122032	0.802959	-4.52374
Eif1ad	3.63117	0.866038	1.63983	0.122033	0.802959	-4.52724
Brap	2.0947	4.91906	1.63871	0.122267	0.802959	-4.43186
Smc4	-2.69917	3.80869	-1.63777	0.122465	0.802959	-4.48114
Cep70	3.31976	1.66448	1.63747	0.122529	0.802959	-4.52296
Ctsa	0.550139	9.5865	1.63746	0.12253	0.802959	-4.46354
Nat9	3.06697	3.25682	1.63731	0.122561	0.802959	-4.4976
Pcid2	2.42972	0.99581	1.6373	0.122564	0.802959	-4.5271
Tcf7l2	2.37583	5.17911	1.63704	0.12262	0.802959	-4.41794
Snph	-3.35395	0.503926	-1.63693	0.122643	0.802959	-4.52832
Akt3	-2.85874	2.90597	-1.63588	0.122863	0.802959	-4.50589
Amtn	1.46329	-3.87997	1.63568	0.122905	0.802959	-4.37292
Mrpl32	2.96608	2.42928	1.6354	0.122965	0.802959	-4.51443
Rnf215	-2.10759	4.27717	-1.63515	0.123017	0.802959	-4.46386
Rpl37	-0.816943	7.05238	-1.63447	0.123162	0.802959	-4.31104
Inppl1	-3.00693	2.00584	-1.63422	0.123215	0.802959	-4.52008
Cebpe	1.95224	-3.8191	1.63403	0.123254	0.802959	-4.37841
Lta	1.5203	-4.02265	1.63378	0.123307	0.802959	-4.3655
Pldi	1.29394	-4.01218	1.63365	0.123334	0.802959	-4.36608
Slc35d2	3.03245	-0.748401	1.63364	0.123336	0.802959	-4.52489
Pknox1	1.21244	6.33879	1.63331	0.123407	0.802959	-4.34939
2023-03-01	0.551929	7.59285	1.63288	0.123497	0.802959	-4.29531
E330033B04Rik	-1.61134	5.34952	-1.63278	0.123518	0.802959	-4.4096
5830417I10Rik	-1.29674	6.20134	-1.63273	0.123529	0.802959	-4.3579
Ppp4r1l-ps	-2.896	0.309223	-1.63269	0.123539	0.802959	-4.52888
Tbx6	-3.47811	1.37928	-1.63252	0.123575	0.802959	-4.52572
Amica1	1.92882	-3.82489	1.632	0.123685	0.802959	-4.37889
Cacna1b	1.80862	-3.72093	1.63168	0.123752	0.802959	-4.38774
1810013L24Rik	0.986667	6.08803	1.63155	0.123779	0.802959	-4.36537
Kctd1	-2.70771	-2.17412	-1.63148	0.123795	0.802959	-4.48574
Klf12	-1.29223	5.25907	-1.63115	0.123864	0.802959	-4.41547
Proser1	-2.73158	4.98796	-1.63095	0.123908	0.802959	-4.43067
Trim7	-2.49293	-3.05891	-1.63051	0.124001	0.802959	-4.4379
Scn1a	2.0559	-3.74516	1.63006	0.124096	0.802959	-4.38642
Upf3a	-3.07943	-0.00516006	-1.62985	0.124142	0.802959	-4.52884
Pomc	1.26472	-4.019	1.6297	0.124174	0.802959	-4.36769
Tead2	3.05602	-2.00068	1.6295	0.124216	0.802959	-4.49331
Hyal3	-2.30756	-3.33406	-1.62904	0.124315	0.802959	-4.41921
Ndufs7	-1.2757	4.46811	-1.62873	0.124379	0.802959	-4.45718
Snx4	1.17585	5.21589	1.62869	0.124389	0.802959	-4.41882
Zfp637	2.83403	1.76603	1.62844	0.124442	0.802959	-4.52327
Dym	2.37294	4.24376	1.62828	0.124477	0.802959	-4.46698
2610306M01Rik	3.66895	-1.61423	1.62794	0.124548	0.802959	-4.5075
Nmt2	4.45645	1.06454	1.62778	0.124583	0.802959	-4.528
Meg3	2.45353	3.75236	1.62769	0.124601	0.802959	-4.48517
Rfx7	0.810846	7.30452	1.62685	0.124782	0.802959	-4.30702
Rab31	1.12973	6.38399	1.62679	0.124795	0.802959	-4.35031
Smarcd1	-2.32478	2.9305	-1.62679	0.124795	0.802959	-4.5069
Rad18	-3.20258	-1.92103	-1.62668	0.124818	0.802959	-4.49692
Ablim2	2.48164	-3.73075	1.62643	0.124871	0.802959	-4.38921
Dmap1	3.27374	2.25644	1.62553	0.125065	0.802959	-4.5183
Olfr115	2.0551	-3.59888	1.62546	0.125079	0.802959	-4.40031
B3galt1	1.85442	-3.84329	1.62518	0.12514	0.802959	-4.38063
4930563E22Rik	3.82181	-0.873536	1.6251	0.125156	0.802959	-4.52469
Wdr78	-3.21305	-2.21755	-1.62455	0.125274	0.802959	-4.4853
Nek8	-3.04714	-2.74937	-1.62374	0.125449	0.802959	-4.45882
Rpl7	-0.844329	6.78646	-1.62341	0.12552	0.802959	-4.33069
Rpl35	-1.23112	5.28762	-1.62327	0.125549	0.802959	-4.41672
Tns1	-1.15046	7.6413	-1.6232	0.125565	0.802959	-4.30252
Pcbp3	-2.00537	-3.63046	-1.62307	0.125592	0.802959	-4.39877
Akap14	1.80978	-3.62074	1.62258	0.125697	0.802959	-4.39975
Kif3b	1.69947	5.2772	1.62256	0.125702	0.802959	-4.41757
Rexo1	1.63524	5.07531	1.62185	0.125856	0.802959	-4.42899
Tcf3	2.59566	2.93856	1.62179	0.125868	0.802959	-4.50757
Ltc4s	-0.767478	7.27348	-1.62114	0.126008	0.802959	-4.3122
Tnfsf10	-3.2305	1.26647	-1.62022	0.126206	0.802959	-4.52795
Gm15319	-0.760067	-3.96377	-1.62019	0.126214	0.802959	-4.37519
Cyp4f16	-3.50658	-0.0725289	-1.62006	0.126241	0.802959	-4.52989
Chmp1b	1.6548	4.96461	1.61979	0.126299	0.802959	-4.43555
Zfp963	3.48551	1.90413	1.61923	0.12642	0.802959	-4.52321
Tprn	3.53648	-0.343043	1.61916	0.126436	0.802959	-4.52909
Tsen34	-3.18738	2.43646	-1.61846	0.126586	0.802959	-4.51686
D630029K05Rik	1.47109	-4.03047	1.61846	0.126587	0.802959	-4.37269
Kpnb1	-0.612968	7.85215	-1.61816	0.126653	0.802959	-4.30603
1700001K23Rik	-0.738311	-4.019	-1.61765	0.126763	0.802959	-4.37361
D630032N06Rik	-0.738311	-4.019	-1.61765	0.126763	0.802959	-4.37361
Cmya5	-2.61787	3.7592	-1.61732	0.126835	0.802959	-4.48714
Churc1	-3.45366	-0.50663	-1.6172	0.12686	0.802959	-4.52858
9130024F11Rik	1.77039	-3.86406	1.6168	0.126947	0.802959	-4.38295
Usp39	3.19528	1.7227	1.6168	0.126948	0.802959	-4.5252
Phax	-2.44174	3.52509	-1.61673	0.126961	0.802959	-4.49428
Gm5148	-0.740399	2.40965	-1.61673	0.126963	0.802959	-4.51749
Gpr124	-2.0188	-3.43927	-1.61616	0.127086	0.802959	-4.41618
Srp54c	2.76306	4.17946	1.61597	0.127126	0.802959	-4.47258
Spon1	3.63442	-0.719994	1.61585	0.127154	0.802959	-4.52742
Cetn4	1.75979	-3.86668	1.61569	0.127188	0.802959	-4.38327
Gm9776	3.22635	0.78205	1.61569	0.127188	0.802959	-4.53045
C1ra	-1.94187	-2.92398	-1.61518	0.127299	0.802959	-4.45103
Nlgn1	-1.77886	-3.86153	-1.61509	0.127318	0.802959	-4.38393
Pi4k2b	1.44487	-2.9222	1.61501	0.127337	0.802959	-4.45118
Ccdc117	-1.60373	5.21767	-1.61479	0.127385	0.802959	-4.4237
Ppp6r1	-1.03482	6.18213	-1.61431	0.127489	0.802959	-4.3685
Zfml	0.599445	7.7852	1.61407	0.12754	0.802959	-4.30934
Fcho2	0.638421	7.29924	1.61237	0.127912	0.802959	-4.31789
2023-09-03	-0.945812	-4.04386	-1.61236	0.127913	0.802959	-4.37509
Rpp40	-3.29084	-1.57296	-1.6121	0.12797	0.802959	-4.51141
D830013O20Rik	1.15758	-4.04386	1.61202	0.127987	0.802959	-4.37526
Iba57	3.46025	-1.54311	1.61201	0.127991	0.802959	-4.51235
Apobec1	1.0928	7.13968	1.61112	0.128185	0.802959	-4.32386
Kif5c	2.15578	-2.99609	1.61096	0.128221	0.802959	-4.4479
Smo	1.66538	6.21824	1.61079	0.128257	0.802959	-4.36827
Nelfe	-3.57105	0.841578	-1.61073	0.128271	0.802959	-4.5309
Nudt7	-3.46881	1.01758	-1.61071	0.128276	0.802959	-4.53032
Gatm	0.893446	6.14496	1.61065	0.128288	0.802959	-4.37248
Lrfn1	-2.18424	-2.15016	-1.61046	0.128329	0.802959	-4.49111
1810044D09Rik	1.44471	-4.03469	1.61001	0.128429	0.802959	-4.37666
Paqr9	1.44471	-4.03469	1.61001	0.128429	0.802959	-4.37666
Il17ra	-0.52386	8.45769	-1.6099	0.128453	0.802959	-4.33397
Tas2r108	1.99722	-3.26065	1.60921	0.128603	0.802959	-4.43133
Dtx4	0.701843	7.83959	1.60915	0.128616	0.802959	-4.31372
Cd47	1.05739	6.69839	1.60913	0.128621	0.802959	-4.34384
Vps8	-2.13655	3.91822	-1.60905	0.128639	0.802959	-4.4837
Ppp1r3fos	-3.08025	-0.475659	-1.60885	0.128682	0.802959	-4.52979
Ryr2	1.78126	-3.62991	1.60849	0.128762	0.802959	-4.40483
Cmip	-1.03891	7.24978	-1.60842	0.128777	0.802959	-4.32222
Zdhhc9	0.898705	6.98465	1.6077	0.128935	0.802959	-4.33203
Neurl1b	-2.66992	-2.84532	-1.60755	0.128968	0.802959	-4.45781
Edil3	1.82758	-3.79712	1.60713	0.129061	0.802959	-4.39237
Micu2	-2.35503	3.59837	-1.60708	0.129072	0.802959	-4.4941
Gbp8	2.98338	-1.8094	1.60662	0.129173	0.802959	-4.5046
Ruvbl2	-3.21006	3.75365	-1.60656	0.129187	0.802959	-4.48957
Ifi204	-3.18802	0.831221	-1.60642	0.129217	0.802959	-4.53146
Siglech	0.305273	10.1049	1.60575	0.129366	0.802959	-4.65129
Mesdc2	1.20038	6.65786	1.60544	0.129434	0.802959	-4.34804
Fto	-2.93085	1.98464	-1.60519	0.129489	0.802959	-4.52431
Lrrn1	2.3359	-3.08427	1.60493	0.129546	0.802959	-4.44428
Fdxr	-2.33577	-1.75529	-1.6049	0.129553	0.802959	-4.50673
A330035P11Rik	-2.89116	-2.41194	-1.60469	0.129599	0.802959	-4.4809
Zfp874b	-2.26601	3.01245	-1.60468	0.129601	0.802959	-4.50893
Hcfc1r1	-3.07433	1.38519	-1.60438	0.129667	0.802959	-4.52928
Lgalsl	-3.30763	-1.50063	-1.60381	0.129793	0.802959	-4.5149
Hectd2	-2.94435	-1.58832	-1.60355	0.129851	0.802959	-4.51232
Nup98	1.48143	6.74231	1.60345	0.129874	0.802959	-4.34525
Camk1g	1.1126	-4.05422	1.60318	0.129933	0.802959	-4.37916
Dcx	1.64757	-3.8944	1.60304	0.129963	0.802959	-4.38716
BC022687	2.17942	-3.30315	1.60251	0.130082	0.802959	-4.43076
Aph1a	3.04564	1.58348	1.60199	0.130198	0.802959	-4.52826
Smim8	3.49161	-1.28441	1.60162	0.130279	0.802959	-4.52088
Cacna1g	1.41697	-4.03915	1.60093	0.130431	0.802959	-4.38092
Rgag1	1.70876	-3.73684	1.60087	0.130445	0.802959	-4.39984
Lta4h	-2.84312	2.3551	-1.60087	0.130446	0.802959	-4.52058
4930526I15Rik	-2.70915	-1.67842	-1.60078	0.130465	0.802959	-4.50995
Rsc1a1	4.16129	0.811294	1.60078	0.130466	0.802959	-4.5322
Rnf121	2.87863	-0.7451	1.60069	0.130485	0.802959	-4.52917
Nop10	-2.91268	2.26562	-1.60052	0.130522	0.802959	-4.52178
Slc16a4	2.09976	-2.97259	1.59943	0.130767	0.802959	-4.45277
Ascl4	1.6016	-3.90657	1.59938	0.130776	0.802959	-4.38818
Hook1	2.53772	-3.34604	1.59936	0.130782	0.802959	-4.42895
Setd5	1.22915	7.64412	1.59921	0.130814	0.802959	-4.32204
Ubash3b	-0.853634	7.843	-1.59895	0.130871	0.802959	-4.3225
Akr1c21	1.58829	-3.91015	1.59852	0.130968	0.802959	-4.38839
Pdgfra	1.58829	-3.91015	1.59852	0.130968	0.802959	-4.38839
5031425E22Rik	-2.68693	2.89239	-1.59805	0.131074	0.802959	-4.51241
Lrrtm1	2.11802	-3.66535	1.59799	0.131087	0.802959	-4.4065
BC107364	1.08764	-4.05995	1.59785	0.131117	0.802959	-4.38154
Herpud1	-1.25022	6.31336	-1.597	0.131307	0.802959	-4.37034
Qsox1	-3.14688	-0.719971	-1.59682	0.131348	0.802959	-4.52986
Ldhb	-0.863265	8.08604	-1.59655	0.131409	0.802959	-4.32924
Mllt1	2.30307	3.99018	1.59641	0.131439	0.802959	-4.48407
Zfp647	-2.60638	-1.86328	-1.59599	0.131534	0.802959	-4.50465
Lrrc51	-3.62353	-1.51597	-1.59592	0.13155	0.802959	-4.51571
Ankhd1	0.792233	7.61945	1.59564	0.131612	0.802959	-4.32508
Tspan4	3.76315	2.34133	1.59518	0.131716	0.802959	-4.52159
Frs3	-3.35723	-1.45408	-1.59517	0.131718	0.802959	-4.51752
Tfpi	1.79658	5.60943	1.59486	0.131786	0.802959	-4.40977
Ugt1a1	-2.683	-2.4285	-1.59474	0.131813	0.802959	-4.48243
Stat3	-1.15952	6.53341	-1.5945	0.131868	0.802959	-4.36053
Il3ra	-1.37864	-3.9057	-1.5938	0.132025	0.802959	-4.39085
Scamp2	0.930938	8.02503	1.59369	0.132049	0.802959	-4.33015
Luzp2	-0.665799	-4.03047	-1.59312	0.132176	0.802959	-4.38511
Gdap2	-2.25325	4.53105	-1.59276	0.132257	0.802959	-4.4642
4930528A17Rik	-0.967871	-3.90398	-1.59265	0.132283	0.802959	-4.39148
Myo19	-2.83081	0.341019	-1.5926	0.132294	0.802959	-4.53377
Mrpl54	2.80548	-1.86484	1.59249	0.132318	0.802959	-4.50523
Tfrc	3.17333	0.587542	1.59229	0.132363	0.802959	-4.53367
Camsap3	1.50602	-3.93215	1.59223	0.132376	0.802959	-4.39018
Zfp191	-1.8923	4.75811	-1.59202	0.132424	0.802959	-4.45434
Nefh	1.11821	-3.94664	1.59165	0.132508	0.802959	-4.3897
Sppl3	1.72455	6.00463	1.59154	0.132532	0.802959	-4.38962
Gpd1	2.22288	3.03384	1.59143	0.132557	0.802959	-4.51074
Cox7a1	1.38772	-4.04386	1.59115	0.13262	0.802959	-4.38552
Kcnk1	1.38772	-4.04386	1.59115	0.13262	0.802959	-4.38552
Wdr12	2.56873	2.45465	1.59082	0.132695	0.802959	-4.52071
Capg	-3.02512	-0.744956	-1.59058	0.13275	0.802959	-4.53047
Phyhipl	1.48727	-3.93712	1.59056	0.132754	0.802959	-4.39071
Secisbp2	-1.88076	3.92526	-1.59051	0.132764	0.802959	-4.48756
Elk4	1.16095	5.71052	1.59044	0.132781	0.802959	-4.40611
Farp1	-2.92941	-0.492118	-1.59006	0.132867	0.802959	-4.53206
Chst1	3.07574	1.83187	1.59003	0.132874	0.802959	-4.52783
Gm3264	1.79052	-0.175947	1.58953	0.132987	0.802959	-4.53334
Rnps1	1.54107	4.54725	1.58949	0.132995	0.802959	-4.46441
Ppp3cc	-3.42638	-2.07712	-1.58911	0.13308	0.802959	-4.49826
Birc3	3.46427	3.34007	1.58889	0.13313	0.802959	-4.5044
Parp8	-1.32619	7.15191	-1.58875	0.133161	0.802959	-4.33915
Fbxo25	3.09489	2.17973	1.58684	0.133594	0.802959	-4.52475
Tcap	1.44599	-3.9481	1.5866	0.133649	0.802959	-4.39203
Celf1	0.55912	7.71612	1.58614	0.133754	0.802959	-4.3326
Npm3	-1.66353	-3.52846	-1.58525	0.133956	0.802959	-4.42156
Pcyox1l	-2.31811	-1.85338	-1.58522	0.133962	0.802959	-4.50693
Gm3086	2.1956	-3.58975	1.58511	0.133987	0.802959	-4.4173
Rap2a	1.02431	7.49678	1.58498	0.134017	0.802959	-4.33463
Plxnc1	3.63626	-1.43573	1.58495	0.134022	0.802959	-4.51958
E030024N20Rik	1.27609	5.79572	1.58482	0.134053	0.802959	-4.40395
Lrrc8c	-1.22371	-3.97806	-1.5848	0.134057	0.802959	-4.39151
4930478L05Rik	1.03143	-4.0728	1.58464	0.134094	0.802959	-4.38751
Ccdc74a	1.03143	-4.0728	1.58464	0.134094	0.802959	-4.38751
Ackr2	1.31052	-3.87392	1.5844	0.134148	0.802959	-4.39725
Dpm3	-3.55839	2.62661	-1.58431	0.134169	0.802959	-4.51915
Usp18	-2.86681	-1.66614	-1.58373	0.134301	0.802959	-4.51319
Thoc7	2.98975	2.3483	1.58326	0.134408	0.802959	-4.52323
Zfp799	1.28659	5.04857	1.58293	0.134483	0.802959	-4.44341
Ache	3.19555	1.36168	1.58285	0.134503	0.802959	-4.53215
Rhpn2	1.45111	-3.86203	1.5819	0.134719	0.802959	-4.39919
4632427E13Rik	-2.47861	2.43202	-1.58187	0.134724	0.802959	-4.52235
[truncated: 20,431 more rows]

## Sheet: 16p11dup-THC vs WT-THC
Supplementary Data 2: Differential expression gene list
16p11dup-THC vs WT-THC
Gene name	logFC	AveExpr	t	two-tailed uncorrected P.Value	adj.P.Val	B
Tub	-6.34517	-2.00672	-7.46393	2.11891e-06	0.0475229	-3.91535
Usp53	-6.11318	-2.965	-6.60587	8.75148e-06	0.0981391	-3.58187
Irf5	-2.05467	7.09995	-5.74209	4.03841e-05	0.301912	-1.96792
Gpr137b-ps	3.39474	5.18462	5.25067	0.000100861	0.480553	-3.49509
Tet3	-2.53319	7.48274	-5.21622	0.000107674	0.480553	-1.80606
Mier1	3.8982	5.03044	5.12317	0.000128559	0.480553	-3.58599
Fzd5	-8.21998	0.912268	-4.91447	0.000192082	0.615431	-4.26403
Agmo	2.44292	5.32496	4.74511	0.000267088	0.74878	-3.52975
F8	-4.79834	-3.10715	-4.6263	0.00033723	0.767004	-3.76775
Tnfsf13b	-6.38947	3.80894	-4.61919	0.000341985	0.767004	-4.02667
Zfp644	1.98426	6.57848	4.53452	0.000404215	0.824158	-2.88857
Hspa9	-1.93298	5.56158	-4.34596	0.00058805	0.955588	-3.51946
Cep85	-7.06128	0.817251	-4.31662	0.000623567	0.955588	-4.30382
Srp14	-3.8615	4.94313	-4.31466	0.000626004	0.955588	-3.7709
Ndufab1	-4.55623	2.79923	-4.30431	0.000639104	0.955588	-4.20481
Socs1	-5.71951	-3.19947	-4.21885	0.000758513	0.964854	-3.80572
Prss36	-7.00928	-1.4421	-4.18886	0.00080562	0.964854	-4.24402
Bscl2	-3.25548	5.53915	-4.15891	0.000855661	0.964854	-3.58031
Them6	4.95117	-2.92867	4.12474	0.000916611	0.964854	-3.92604
Cd63	1.99287	6.85915	4.06814	0.00102749	0.964854	-2.91774
Mrpl20	-5.41978	1.67257	-4.0266	0.00111746	0.964854	-4.30235
Fgfr1	5.82452	-2.37713	4.02046	0.00113145	0.964854	-4.09832
Crlf2	-6.8834	0.834761	-3.98568	0.00121394	0.964854	-4.3275
Chchd3	-5.13834	2.46458	-3.92616	0.00136959	0.964854	-4.26866
Mdm4	1.14321	7.4496	3.87114	0.00153143	0.964854	-2.64688
Sart3	-5.26005	4.09555	-3.8447	0.00161596	0.964854	-4.07794
Rpf2	-6.66901	0.324838	-3.82422	0.00168467	0.964854	-4.34348
Mapkapk2	3.053	5.43839	3.80671	0.00174576	0.964854	-3.71955
Gm14391	-5.2821	2.88521	-3.78673	0.00181822	0.964854	-4.24944
Frat1	-5.40087	-1.65392	-3.77811	0.00185043	0.964854	-4.2573
Rpusd3	6.78085	-0.711772	3.75683	0.00193235	0.964854	-4.33607
Klhl23	3.58906	2.79153	3.74393	0.00198383	0.964854	-4.26214
1700123M08Rik	-3.84906	-3.06942	-3.72725	0.0020524	0.964854	-3.95751
Nfib	4.14805	-2.94665	3.72205	0.00207428	0.964854	-3.9973
Bag6	-2.62217	5.92738	-3.70449	0.00214987	0.964854	-3.56207
Svip	5.18884	-1.36214	3.70301	0.00215637	0.964854	-4.29877
2410089E03Rik	-3.5491	4.40444	-3.68964	0.00221596	0.964854	-4.04227
Mgat5	-2.69118	5.31175	-3.68281	0.00224702	0.964854	-3.79846
Elmo3	-6.51166	-0.702386	-3.67791	0.0022696	0.964854	-4.34298
Bcl6	5.53215	3.68258	3.6687	0.00231263	0.964854	-4.17315
Nup37	-4.74964	-1.87946	-3.66388	0.00233549	0.964854	-4.23853
H2-Ob	-3.12575	5.2301	-3.64157	0.00244427	0.964854	-3.83604
Ly9	6.78112	1.0003	3.63854	0.00245944	0.964854	-4.35251
Unc45a	-5.79712	-1.44397	-3.63015	0.00250187	0.964854	-4.29758
Myo1e	-5.54513	1.89069	-3.62034	0.00255251	0.964854	-4.32876
Cdc7	-5.6528	-1.61418	-3.62027	0.00255284	0.964854	-4.27948
Rapgef5	2.14619	6.56627	3.60934	0.00261047	0.964854	-3.31268
Vps8	-5.22584	3.91822	-3.60805	0.00261734	0.964854	-4.14691
Polr1c	-6.44782	1.64105	-3.57625	0.00279293	0.964854	-4.34203
Agl	4.29308	3.78755	3.56668	0.00284803	0.964854	-4.17323
5430416N02Rik	-6.68119	-0.614044	-3.55499	0.00291687	0.964854	-4.35561
Hook3	1.1335	9.08648	3.53438	0.00304231	0.964854	-1.92265
Adam18	-4.41921	-2.90043	-3.52449	0.0031044	0.964854	-4.05074
Rala	2.74809	5.02821	3.52187	0.00312104	0.964854	-3.92674
Rnf180	3.22306	5.51351	3.50916	0.00320313	0.964854	-3.78339
Ddx3y	2.28772	6.01446	3.50782	0.00321194	0.964854	-3.60141
Nme6	-6.69453	-1.42337	-3.50641	0.00322121	0.964854	-4.31256
Sirt3	-4.87231	1.0581	-3.50271	0.00324565	0.964854	-4.363
Ccdc167	3.09527	5.04352	3.49952	0.0032669	0.964854	-3.9283
Usp31	5.72154	4.77771	3.48464	0.00336774	0.964854	-4.00007
Clcf1	-5.96461	-0.616571	-3.4735	0.00344524	0.964854	-4.36264
Prpf38b	1.29297	7.88188	3.4671	0.00349065	0.964854	-2.68547
Klhl36	-5.47976	2.99808	-3.45723	0.00356174	0.964854	-4.27765
Armcx6	-3.80923	-3.22815	-3.45115	0.00360626	0.964854	-3.96929
Rps27l	5.84069	3.38222	3.44642	0.00364125	0.964854	-4.24181
Med8	-4.91458	2.54324	-3.4316	0.00375323	0.964854	-4.3141
4933426M11Rik	3.30519	5.03785	3.42457	0.0038076	0.964854	-3.94928
H1f0	2.93686	4.87359	3.42298	0.00381998	0.964854	-3.99143
Seh1l	3.76408	5.00428	3.42016	0.00384199	0.964854	-3.9592
Ndufb4	-2.96676	3.92456	-3.41877	0.00385299	0.964854	-4.17673
Fam107a	-6.59011	-1.82126	-3.41516	0.00388146	0.964854	-4.2774
Pdhx	-4.68943	1.98056	-3.41198	0.00390682	0.964854	-4.3449
Anp32a	-1.76795	5.96367	-3.39928	0.00400953	0.964854	-3.6637
Vcan	4.91423	-2.08716	3.39001	0.00408621	0.964854	-4.24288
Sec11a	-3.93202	4.9145	-3.38697	0.00411161	0.964854	-3.99027
Repin1	6.11111	2.21022	3.37982	0.00417215	0.964854	-4.33794
Sys1	-5.88675	2.16309	-3.37196	0.0042397	0.964854	-4.34094
Ndufb8	4.99971	2.88821	3.36449	0.00430492	0.964854	-4.29787
Plaa	3.23573	5.62036	3.35995	0.00434503	0.964854	-3.79736
Gpsm1	-5.51084	1.49096	-3.35869	0.00435627	0.964854	-4.36636
Syap1	-3.62351	3.44796	-3.34943	0.00443942	0.964854	-4.24824
Exog	5.25743	2.33355	3.34097	0.00451686	0.964854	-4.33584
Vprbp	3.33887	4.64312	3.33147	0.00460538	0.964854	-4.06526
9330151L19Rik	4.27341	3.83719	3.33046	0.00461487	0.964854	-4.20369
Pstpip2	-5.91804	-1.52812	-3.32809	0.00463724	0.964854	-4.32163
Mmp24	-4.94002	-2.05678	-3.31278	0.00478452	0.964854	-4.25836
Pank4	-5.82449	3.28495	-3.30269	0.0048842	0.964854	-4.27151
Psd	-5.13636	-2.47384	-3.30038	0.0049073	0.964854	-4.19052
6030468B19Rik	-5.48181	-0.829587	-3.29677	0.00494353	0.964854	-4.37285
Smox	-2.77959	6.21637	-3.27978	0.00511814	0.964854	-3.6191
Top2a	-7.01284	-0.998596	-3.2762	0.0051556	0.964854	-4.36748
Pcmt1	-6.28307	2.1935	-3.27419	0.00517688	0.964854	-4.34969
Prr11	-5.24393	-2.06041	-3.26924	0.00522946	0.964854	-4.26404
Kif21a	-3.70735	-2.65607	-3.26253	0.00530154	0.964854	-4.16106
Cdkal1	4.89207	3.12033	3.24816	0.00545941	0.964854	-4.29373
Cope	-4.45192	4.63817	-3.23263	0.00563516	0.964854	-4.08865
Cav2	4.1977	-2.90864	3.23067	0.00565776	0.964854	-4.11081
D17Wsu92e	-3.22259	4.33846	-3.2297	0.00566897	0.964854	-4.14507
Ttll4	-5.06864	2.62244	-3.22235	0.00575466	0.964854	-4.33283
Tep1	-2.45886	5.90781	-3.21673	0.00582096	0.964854	-3.75549
Ubap1l	-3.78784	-3.73716	-3.20995	0.00590203	0.964854	-3.85337
Cdk4	5.09941	4.32219	3.2096	0.0059062	0.964854	-4.15189
Ubxn6	-3.26013	4.49968	-3.20087	0.0060124	0.964854	-4.12237
Cep104	-6.39743	0.495203	-3.1996	0.00602795	0.964854	-4.39525
Fahd2a	-5.44557	-2.17662	-3.19662	0.00606468	0.964854	-4.25775
BC020402	-5.37077	-1.0004	-3.19383	0.00609925	0.964854	-4.37545
Pigs	-3.37692	3.205	-3.1876	0.00617733	0.964854	-4.29455
Arpc4	-0.822106	7.7093	-3.18271	0.00623919	0.964854	-3.01929
St6galnac4	3.14135	5.97743	3.18249	0.00624193	0.964854	-3.74598
Gins2	-6.9599	-0.778563	-3.18156	0.00625381	0.964854	-4.38539
Egr2	-4.11075	-2.78315	-3.18128	0.00625739	0.964854	-4.15005
Ndufc2	-2.36809	4.89097	-3.17986	0.00627553	0.964854	-4.04812
Slc24a2	5.32234	-1.50149	3.16949	0.00640954	0.964854	-4.34233
Rictor	-1.92303	5.64437	-3.16454	0.00647456	0.964854	-3.85801
Ranbp1	-4.21519	2.90183	-3.16074	0.00652493	0.964854	-4.32198
Psmd2	-5.16669	3.63722	-3.16064	0.0065262	0.964854	-4.25567
Slc2a12	4.38126	-2.67294	3.15731	0.00657068	0.964854	-4.17791
E230029C05Rik	1.87297	6.62575	3.15312	0.00662699	0.964854	-3.52275
Hsdl2	4.97657	2.11445	3.14959	0.00667492	0.964854	-4.36621
Neu1	-2.96737	4.57892	-3.14579	0.00672679	0.964854	-4.11984
Impact	-2.59915	5.73247	-3.14249	0.00677215	0.964854	-3.83963
Gadd45g	5.10327	-1.91233	3.14199	0.00677899	0.964854	-4.30167
Rab3d	-4.02679	-3.4515	-3.1416	0.00678438	0.964854	-3.98024
Sdccag8	1.80985	5.48209	3.14155	0.00678508	0.964854	-3.91243
Ubqln2	-3.20314	3.84518	-3.13487	0.00687807	0.964854	-4.23531
Chd2	-1.42983	7.59021	-3.13351	0.0068971	0.964854	-3.11615
Pilra	-3.42316	4.27669	-3.12735	0.00698415	0.964854	-4.17584
Ugt1a6a	7.19741	-0.628197	3.12651	0.00699612	0.964854	-4.39399
Zfp597	-2.70546	4.23893	-3.1263	0.00699914	0.964854	-4.18196
Cpd	3.61026	4.80263	3.12166	0.00706555	0.964854	-4.08165
Marveld1	-5.29498	-2.05332	-3.12096	0.00707562	0.964854	-4.2865
Nacc2	3.50088	4.73634	3.11656	0.0071393	0.964854	-4.09631
Dtx3	-2.23334	5.09212	-3.11309	0.00718994	0.964854	-4.02042
Eef1b2	2.64256	5.99549	3.11287	0.00719321	0.964854	-3.76883
BC029722	-6.53684	0.305143	-3.11165	0.00721105	0.964854	-4.40349
Gna11	3.85655	3.51136	3.10964	0.00724066	0.964854	-4.27699
Ddx10	-5.61065	3.20657	-3.10743	0.00727324	0.964854	-4.30544
Rtn4ip1	6.19839	0.357834	3.10165	0.00735937	0.964854	-4.4044
Gabarap	2.40615	6.28936	3.09698	0.00742964	0.964854	-3.67674
Rnft1	-3.13974	3.78964	-3.09611	0.00744284	0.964854	-4.24863
Mapk8ip3	-2.64651	5.41881	-3.0935	0.00748243	0.964854	-3.94531
Zdhhc9	1.87199	6.98465	3.09241	0.00749911	0.964854	-3.41286
Ndfip1	2.51113	4.25414	3.09204	0.00750463	0.964854	-4.18641
Myl12a	2.63851	5.28223	3.08476	0.00761671	0.964854	-3.98301
Zyg11b	1.57379	7.57222	3.08288	0.0076458	0.964854	-3.16485
Dync1h1	1.00857	8.97063	3.07372	0.00778958	0.964854	-2.5692
Hs2st1	-3.87083	5.2327	-3.07344	0.00779412	0.964854	-3.99859
Btbd6	3.92179	2.4035	3.07146	0.00782552	0.964854	-4.36199
Batf2	-2.49817	-3.14607	-3.07055	0.00784006	0.964854	-4.08905
Epn1	2.99027	5.2596	3.06918	0.00786181	0.964854	-3.99335
Cask	-1.67594	6.4775	-3.06815	0.00787832	0.964854	-3.62386
Etfa	-4.16697	3.4968	-3.06809	0.0078793	0.964854	-4.28478
Gm14137	-4.43841	-3.14048	-3.05933	0.00802098	0.964854	-4.09333
Nupl1	-2.67653	5.39179	-3.05362	0.00811458	0.964854	-3.96525
Scamp5	-1.82761	7.02242	-3.04968	0.00817978	0.964854	-3.42466
9030624J02Rik	-1.77984	5.71628	-3.04751	0.00821598	0.964854	-3.87972
Cck	-4.8283	-3.21824	-3.04654	0.00823216	0.964854	-4.07622
4933427D14Rik	-3.7224	1.56634	-3.04527	0.00825346	0.964854	-4.39447
Trappc12	3.77696	5.16989	3.03898	0.00835948	0.964854	-4.02371
Ccdc71	-5.00239	3.36645	-3.03626	0.00840594	0.964854	-4.30175
Hsp90ab1	-0.726396	8.92604	-3.03508	0.00842597	0.964854	-2.63443
Tsr1	5.58541	1.35869	3.03339	0.00845503	0.964854	-4.40027
2900008C10Rik	5.95804	-2.07845	3.03133	0.00849047	0.964854	-4.2965
Cblb	-3.64105	4.72914	-3.02871	0.00853584	0.964854	-4.1191
Tspyl2	-5.03303	3.77869	-3.02555	0.00859064	0.964854	-4.26179
Ttf2	-5.63224	0.934279	-3.0244	0.00861079	0.964854	-4.40783
Ophn1	-1.03989	8.07762	-3.01799	0.00872353	0.964854	-2.99725
BC031181	2.79034	5.12935	3.01758	0.00873081	0.964854	-4.03922
Ube3a	2.16815	5.66824	3.0159	0.00876067	0.964854	-3.90489
Thap1	6.35866	-0.155797	3.01156	0.00883821	0.964854	-4.41083
Aif1	-1.16952	7.86949	-3.00866	0.00889044	0.964854	-3.0962
Gpr137b	2.77528	4.84484	3.00838	0.00889552	0.964854	-4.10183
Prpf4	4.56448	4.39053	3.00375	0.0089794	0.964854	-4.18346
Ddx1	-3.87872	4.45818	-3.00345	0.00898485	0.964854	-4.17266
Abcc4	5.18527	1.05983	2.99975	0.00905264	0.964854	-4.40856
Fam175a	5.18369	2.94253	2.99124	0.00921025	0.964854	-4.34093
Ncor2	1.84343	7.60817	2.98701	0.00928956	0.964854	-3.2265
Cct7	-2.9298	5.51034	-2.97289	0.00955929	0.964854	-3.96203
Ctsz	-0.988853	8.3423	-2.97279	0.00956121	0.964854	-2.93171
Narfl	-4.66915	3.33236	-2.96881	0.00963866	0.964854	-4.31464
Uqcc1	-5.60202	-0.0385111	-2.96659	0.00968217	0.964854	-4.41583
1700008J07Rik	-5.10212	0.501632	-2.96425	0.00972828	0.964854	-4.41666
Tcerg1	2.5597	5.97003	2.9598	0.0098163	0.964854	-3.84081
Upf1	-2.69686	5.39848	-2.95954	0.00982149	0.964854	-3.99429
2023-09-07	-1.57216	5.36976	-2.95937	0.00982492	0.964854	-4.00125
Sdr42e1	-4.95849	-2.3623	-2.95498	0.00991269	0.964854	-4.26928
Gde1	-4.88502	3.72001	-2.95267	0.00995907	0.964854	-4.28049
Rbm43	-4.36559	3.57304	-2.9479	0.0100558	0.964854	-4.29609
Zbtb6	-3.12431	4.59345	-2.94776	0.0100586	0.964854	-4.16279
Hif1an	-5.14632	1.61339	-2.94195	0.0101776	0.964854	-4.40369
Jarid2	-3.1398	4.69768	-2.94144	0.0101882	0.964854	-4.14621
Ppp2r5e	-4.74906	4.14524	-2.94094	0.0101985	0.964854	-4.23195
Sec24c	-1.84533	6.41699	-2.93867	0.0102454	0.964854	-3.71105
Neurl3	-2.62427	5.38098	-2.93351	0.0103531	0.964854	-4.00701
Cnnm1	3.46749	-3.5454	2.92139	0.01061	0.964854	-4.01865
Abcf3	-3.77506	4.24496	-2.91969	0.0106466	0.964854	-4.22259
Cspp1	3.52181	4.12392	2.91531	0.0107413	0.964854	-4.23978
Lipa	2.08389	6.43708	2.91373	0.0107758	0.964854	-3.71723
Gnao1	6.50043	1.15045	2.91287	0.0107946	0.964854	-4.41556
Ranbp10	-2.36935	5.61869	-2.91013	0.0108545	0.964854	-3.95665
Tlr2	1.85773	5.76047	2.90796	0.0109021	0.964854	-3.92049
Dph2	-4.84787	-1.96151	-2.90624	0.0109401	0.964854	-4.32915
Cand1	-1.76281	6.02971	-2.90252	0.0110227	0.964854	-3.84788
Jrk	-4.24177	-1.46748	-2.90228	0.011028	0.964854	-4.37657
Cdk1	-4.85427	-2.8313	-2.89653	0.0111569	0.964854	-4.20085
Prickle1	-5.68696	-1.2874	-2.89327	0.0112306	0.964854	-4.39064
Gaa	1.96512	5.47646	2.89326	0.0112308	0.964854	-3.99776
Sestd1	3.93915	-3.08134	2.88436	0.0114347	0.964854	-4.1517
Helz2	5.36583	-1.38935	2.87916	0.0115555	0.964854	-4.38514
Prpf18	-3.22331	3.52321	-2.87272	0.0117066	0.964854	-4.31268
Sel1l	1.19968	7.59521	2.86812	0.0118157	0.964854	-3.32869
Dcaf6	-5.39306	2.72746	-2.86733	0.0118347	0.964854	-4.36981
Ggact	-4.3324	-1.26792	-2.86533	0.0118826	0.964854	-4.39496
Rsph3b	-6.56118	-0.165504	-2.86378	0.0119196	0.964854	-4.42465
Psd4	2.42907	5.57356	2.86359	0.0119241	0.964854	-3.98467
Crtc2	1.55513	5.65419	2.86301	0.0119382	0.964854	-3.965
Astn1	4.53296	-2.31539	2.8621	0.0119601	0.964854	-4.29201
Frrs1	2.16591	7.08756	2.86122	0.0119814	0.964854	-3.52384
Hexim1	4.72269	3.9975	2.85256	0.0121925	0.964854	-4.26735
Sptbn2	5.61627	-1.09716	2.84937	0.0122712	0.964854	-4.40611
Mphosph8	-4.05192	3.7785	-2.84921	0.012275	0.964854	-4.292
Zfp764	-5.46964	2.15963	-2.84865	0.012289	0.964854	-4.39724
Athl1	-5.72481	0.365931	-2.84789	0.0123078	0.964854	-4.42786
Csf1	-6.1221	0.169877	-2.84259	0.0124401	0.964854	-4.42826
Trim65	2.53256	6.08912	2.83928	0.0125232	0.964854	-3.85876
Bcl2	4.80143	2.78625	2.83704	0.0125799	0.964854	-4.37043
B3gnt1	-6.08418	1.35803	-2.83235	0.0126994	0.964854	-4.42006
Mrps21	-4.86495	2.68144	-2.8314	0.0127237	0.964854	-4.37676
Isca1	-4.23943	4.28489	-2.82243	0.0129555	0.964854	-4.23727
Tmem223	-4.12325	3.00153	-2.82236	0.0129575	0.964854	-4.35963
Gm6525	-5.81032	-1.4995	-2.81936	0.0130359	0.964854	-4.38413
Tubb5	1.21857	7.29246	2.81798	0.0130722	0.964854	-3.48023
Ankmy2	-5.66049	2.52183	-2.81695	0.0130993	0.964854	-4.38625
Ttc14	0.791646	8.10848	2.81576	0.0131308	0.964854	-3.18201
Mrps10	5.6234	0.883921	2.81194	0.013232	0.964854	-4.42854
1700001C19Rik	-4.47959	-2.2353	-2.80865	0.01332	0.964854	-4.31162
Manba	-3.67516	3.57087	-2.80662	0.0133745	0.964854	-4.31901
Trim28	-2.22776	5.9848	-2.79775	0.0136153	0.964854	-3.90557
Hspa1a	-3.26774	-3.432	-2.79537	0.0136806	0.964854	-4.09083
Ppp1r13b	4.24139	3.86819	2.79214	0.0137697	0.964854	-4.29277
Plxdc1	2.84065	5.24945	2.79081	0.0138064	0.964854	-4.0819
Usp38	3.07958	5.04946	2.78965	0.0138387	0.964854	-4.12181
Scap	2.70829	4.76171	2.78892	0.0138592	0.964854	-4.1733
Scd2	2.3167	5.26933	2.78647	0.0139274	0.964854	-4.07916
Zcchc2	1.24439	6.80375	2.78443	0.0139846	0.964854	-3.6699
Mrps30	4.42308	1.58063	2.77876	0.0141448	0.964854	-4.42111
Slc31a2	-2.82952	5.9001	-2.77824	0.0141597	0.964854	-3.93597
Dyrk2	-3.72042	3.71954	-2.7771	0.0141922	0.964854	-4.31027
Nae1	-4.47794	3.06914	-2.77473	0.0142597	0.964854	-4.36192
Rad50	2.10644	6.57619	2.77411	0.0142776	0.964854	-3.74755
Tctn1	-4.8287	1.02355	-2.77324	0.0143024	0.964854	-4.43083
5430402O13Rik	-4.21524	-2.86331	-2.7723	0.0143297	0.964854	-4.22263
Psmd6	-3.15293	4.22288	-2.77185	0.0143426	0.964854	-4.25585
2023-03-01	1.01234	7.59285	2.77174	0.0143457	0.964854	-3.40834
Mtch2	-4.41851	4.19039	-2.7716	0.0143496	0.964854	-4.25996
Paqr8	5.43919	-1.6392	2.77157	0.0143504	0.964854	-4.37909
Zmym1	3.21893	4.64112	2.76993	0.0143979	0.964854	-4.1975
Mppe1	-4.3442	-1.11812	-2.7695	0.0144102	0.964854	-4.41362
Tmed8	3.54223	3.52073	2.76698	0.0144833	0.964854	-4.32975
Wdr24	4.58667	1.63979	2.76566	0.0145218	0.964854	-4.42116
Igsf10	5.39393	1.84817	2.76449	0.0145559	0.964854	-4.41617
Prkab2	4.52837	0.992128	2.76426	0.0145627	0.964854	-4.43207
Frat2	5.93299	-1.28334	2.76269	0.0146085	0.964854	-4.40563
Bmi1	3.30974	3.98174	2.76209	0.0146264	0.964854	-4.28614
Gnb2l1	-1.3143	7.43805	-2.7605	0.0146729	0.964854	-3.47179
Tbc1d17	3.79573	5.18168	2.75662	0.0147875	0.964854	-4.10611
A630007B06Rik	-2.389	4.83084	-2.75653	0.0147904	0.964854	-4.17011
Evl	-1.35119	6.76055	-2.75651	0.0147908	0.964854	-3.70041
Psmd7	-3.46046	4.01157	-2.75584	0.0148109	0.964854	-4.28402
Ccnc	2.78525	3.45074	2.75258	0.0149078	0.964854	-4.33776
1700025G04Rik	-4.82812	0.156514	-2.75246	0.0149117	0.964854	-4.43679
Fam3a	-3.99225	4.74076	-2.75125	0.0149478	0.964854	-4.18634
Commd6	-3.17322	4.34136	-2.75103	0.0149544	0.964854	-4.24496
Fbxw7	4.07162	3.52922	2.75092	0.0149576	0.964854	-4.33161
Prss12	2.94861	-3.52258	2.7508	0.0149612	0.964854	-4.08055
Mto1	-4.06446	3.26428	-2.75079	0.0149616	0.964854	-4.35215
Dync2h1	-5.23239	3.30973	-2.7494	0.0150033	0.964854	-4.34906
Agap2	-5.92978	-0.126502	-2.74836	0.0150347	0.964854	-4.43595
Tmem164	3.5112	4.95689	2.74649	0.0150912	0.964854	-4.15102
Pms2	-5.88242	1.6891	-2.74405	0.0151651	0.964854	-4.42228
Rab35	-4.53103	4.60217	-2.74069	0.0152677	0.964854	-4.21053
Ythdf3	1.41604	7.1265	2.73803	0.0153491	0.964854	-3.59407
Mmp28	-5.29573	-1.20291	-2.73767	0.0153603	0.964854	-4.41278
Rsph4a	-4.03038	-1.95158	-2.73727	0.0153726	0.964854	-4.355
Utp6	3.98842	4.22761	2.73213	0.0155316	0.964854	-4.26346
Mccc1os	-3.06663	-3.41683	-2.73207	0.0155336	0.964854	-4.11418
Faim2	3.18522	-3.71821	2.73073	0.0155751	0.964854	-4.03103
Sike1	1.75952	6.10931	2.72768	0.0156708	0.964854	-3.90364
Ppp6c	3.28288	4.16609	2.72664	0.0157034	0.964854	-4.27203
Sypl	1.4851	5.67592	2.7262	0.0157171	0.964854	-4.01109
Gla	-5.8909	-1.67462	-2.72539	0.0157429	0.964854	-4.38218
Gm5431	4.62372	1.2691	2.7218	0.0158564	0.964854	-4.43259
Zbtb21	-6.38112	1.80492	-2.70836	0.0162884	0.964854	-4.42331
Gm8369	2.49983	-3.03314	2.70786	0.0163048	0.964854	-4.20597
Lypd6	-4.20743	-1.50622	-2.70617	0.0163599	0.964854	-4.39754
Man1a2	0.984581	8.62689	2.70457	0.0164125	0.964854	-3.13148
Alpk1	5.42804	0.962751	2.70261	0.0164768	0.964854	-4.4384
AI462493	-6.48371	1.80186	-2.70076	0.0165378	0.964854	-4.4242
Wwtr1	2.59811	-3.79006	2.70054	0.0165452	0.964854	-4.02014
Fads6	4.23535	-3.35626	2.69831	0.0166191	0.964854	-4.13916
Dnajc24	4.75711	2.59329	2.69814	0.0166248	0.964854	-4.39759
Neurl1a	-4.41619	4.16102	-2.69736	0.0166507	0.964854	-4.27856
Rpl10	-0.728989	8.65847	-2.69548	0.0167133	0.964854	-3.13325
Kras	-1.61723	5.95204	-2.69465	0.0167411	0.964854	-3.95813
Kcnip2	5.08791	-2.78541	2.69391	0.0167659	0.964854	-4.25367
Atox1	3.67701	3.61259	2.69135	0.016852	0.964854	-4.33433
Cd86	1.51166	7.7999	2.69001	0.0168969	0.964854	-3.40668
Pyroxd2	-2.46872	5.43308	-2.68934	0.0169197	0.964854	-4.07732
Apbb2	2.43805	6.09566	2.68539	0.0170538	0.964854	-3.92638
Tsc22d4	3.37715	6.03911	2.68465	0.017079	0.964854	-3.94093
Col4a3bp	-2.00836	4.98258	-2.68387	0.0171053	0.964854	-4.16411
Uros	-6.34887	0.805764	-2.68307	0.017133	0.964854	-4.44169
Rnf219	-6.19268	2.36177	-2.68302	0.0171344	0.964854	-4.40891
Agfg2	-5.93453	-0.793969	-2.68238	0.0171564	0.964854	-4.43427
Lphn2	2.53114	5.24494	2.68209	0.0171663	0.964854	-4.11707
Rab3ip	-2.66343	5.13173	-2.68065	0.0172159	0.964854	-4.13863
Dhx33	-3.09732	4.94269	-2.67743	0.0173269	0.964854	-4.1727
Dusp3	2.515	4.97151	2.6767	0.0173519	0.964854	-4.16803
Clk4	1.80471	7.13487	2.67524	0.0174027	0.964854	-3.6346
Zfp324	3.17184	3.19411	2.67457	0.0174261	0.964854	-4.36812
Ganc	2.66115	4.92164	2.67411	0.017442	0.964854	-4.17713
Snx25	-5.78198	1.32988	-2.67293	0.0174832	0.964854	-4.43656
Klhdc9	-4.98133	-1.71749	-2.67247	0.017499	0.964854	-4.38568
2023-03-08	-3.5794	3.97764	-2.66975	0.0175942	0.964854	-4.30402
Rev3l	1.06186	5.83535	2.66969	0.0175966	0.964854	-3.9964
Rad51b	5.22307	-1.41834	2.66955	0.0176015	0.964854	-4.40796
Hk3	2.10469	6.04815	2.66665	0.0177036	0.964854	-3.94669
Chd1	1.92982	6.54084	2.66485	0.017767	0.964854	-3.81779
Alg1	-4.78036	4.18544	-2.6626	0.0178469	0.964854	-4.28282
Sptssa	3.25164	4.28615	2.66073	0.0179137	0.964854	-4.27133
Pqlc1	-2.95317	-3.08901	-2.65967	0.0179515	0.964854	-4.20733
Fam134a	4.49431	3.01656	2.65889	0.0179796	0.964854	-4.38124
Mki67	-5.93465	0.849601	-2.65818	0.018005	0.964854	-4.44376
Tspan33	-5.48747	1.33276	-2.6581	0.0180078	0.964854	-4.43802
Slc22a17	3.54839	3.88275	2.65664	0.0180605	0.964854	-4.31595
Phf10	-3.02615	3.87811	-2.65618	0.018077	0.964854	-4.31648
Fam161b	4.09454	-2.73941	2.65283	0.0181978	0.964854	-4.27001
Ciz1	-1.51745	6.16093	-2.65272	0.0182018	0.964854	-3.9249
Capn10	5.37742	-1.16831	2.65157	0.0182438	0.964854	-4.42409
Btg2	1.26371	6.68763	2.65149	0.0182467	0.964854	-3.78385
Rpl8	-1.7885	6.38133	-2.64747	0.0183933	0.964854	-3.87041
Rrp15	5.05252	-0.853009	2.64734	0.018398	0.964854	-4.43634
Reep4	5.03544	0.853423	2.64434	0.0185083	0.964854	-4.44509
Bcl2l13	3.66371	3.58633	2.64335	0.018545	0.964854	-4.34448
1700029J07Rik	-5.6465	-0.586222	-2.64284	0.0185638	0.964854	-4.44179
Id2	6.11254	0.66477	2.64228	0.0185845	0.964854	-4.44655
Crbn	1.53607	5.88391	2.63315	0.0189251	0.964854	-4.00023
Myl6	-1.7111	5.53898	-2.62816	0.0191141	0.964854	-4.07703
R3hdm1	-1.72967	6.15611	-2.6268	0.0191657	0.964854	-3.9382
H2-L	-3.16189	-3.25567	-2.62645	0.0191792	0.964854	-4.18248
Abhd13	2.34388	5.53628	2.62472	0.0192454	0.964854	-4.07883
Hemk1	-5.25228	1.68902	-2.62444	0.019256	0.964854	-4.43492
Glrp1	4.18232	0.882938	2.62279	0.0193192	0.964854	-4.44695
Erich1	-6.78542	0.523128	-2.61843	0.0194872	0.964854	-4.44945
Slc39a4	5.81424	-0.812542	2.61832	0.0194918	0.964854	-4.44039
Fyn	-6.06225	-0.115584	-2.61781	0.0195113	0.964854	-4.44866
Mbnl2	-1.27244	6.98539	-2.6175	0.0195234	0.964854	-3.71865
Fbxo9	-2.90005	4.42752	-2.61714	0.0195372	0.964854	-4.26343
Gimap6	-3.46674	3.88433	-2.61573	0.0195922	0.964854	-4.32332
Aggf1	-1.74642	4.8399	-2.61569	0.0195937	0.964854	-4.2061
Klhl15	5.87698	-0.393447	2.61569	0.0195939	0.964854	-4.44674
Alyref2	-4.75193	-0.623799	-2.61564	0.0195956	0.964854	-4.44401
Apobec3	-2.42789	7.14307	-2.61398	0.0196604	0.964854	-3.67446
Emc8	-4.52007	4.01467	-2.61295	0.0197009	0.964854	-4.31111
Luc7l2	1.20839	7.50767	2.61091	0.0197807	0.964854	-3.56627
Bloc1s5	5.00303	-0.765861	2.6084	0.0198797	0.964854	-4.44242
Ppil1	-4.92395	-0.249476	-2.60427	0.0200434	0.964854	-4.44912
Sarm1	-5.35745	-1.35491	-2.604	0.020054	0.964854	-4.41976
Ilk	1.28106	6.14245	2.60274	0.0201042	0.964854	-3.95274
Sez6l2	-3.32443	-3.02043	-2.60081	0.0201815	0.964854	-4.23507
Elavl3	3.14973	-3.22769	2.60032	0.020201	0.964854	-4.19562
Slc37a2	-2.17478	5.62119	-2.59984	0.0202203	0.964854	-4.07054
4930512B01Rik	4.67267	-1.93041	2.59944	0.0202366	0.964854	-4.37745
Cd68	0.883841	9.72311	2.59441	0.0204392	0.964854	-3.10246
Mlph	-2.0045	7.0116	-2.59311	0.0204921	0.964854	-3.72703
Tm7sf3	-2.25687	4.76874	-2.59167	0.0205506	0.964854	-4.22312
Eva1b	-6.56009	0.302737	-2.59026	0.0206084	0.964854	-4.45251
Uso1	2.38059	6.00631	2.59014	0.0206133	0.964854	-3.99048
Ehf	-4.56935	-3.2216	-2.5899	0.0206231	0.964854	-4.19975
Mxd1	-4.72873	2.40158	-2.5879	0.0207049	0.964854	-4.41882
Pitpnc1	2.53647	5.86408	2.58783	0.0207078	0.964854	-4.0235
Sp4	2.06471	6.10253	2.58722	0.0207328	0.964854	-3.96941
Cutc	-3.77202	-2.44796	-2.58689	0.0207464	0.964854	-4.32405
Rexo2	3.3	4.29656	2.58595	0.0207853	0.964854	-4.28614
Thumpd1	-5.86237	1.30119	-2.58339	0.0208909	0.964854	-4.4461
Lmbr1l	-4.83557	0.77612	-2.58163	0.0209638	0.964854	-4.45181
Abca9	0.506606	9.72169	2.57949	0.021053	0.964854	-3.12498
Polr2e	-4.55501	3.87847	-2.57795	0.0211172	0.964854	-4.33081
Trim68	-5.41025	0.0684811	-2.5774	0.0211406	0.964854	-4.4534
Dna2	-3.21368	-2.63959	-2.57733	0.0211433	0.964854	-4.30064
Fam168b	-1.40638	7.56467	-2.57681	0.0211652	0.964854	-3.57646
Mrps34	-5.58539	0.220455	-2.57568	0.0212123	0.964854	-4.45389
Fbxl18	-3.88802	-0.761227	-2.57346	0.0213062	0.964854	-4.44609
2410016O06Rik	4.92092	1.7865	2.56699	0.0215806	0.964854	-4.43896
Unc5d	-3.40642	-3.81764	-2.56641	0.0216054	0.964854	-4.06352
Duoxa1	-4.5577	-2.70183	-2.5646	0.021683	0.964854	-4.29453
Acsf2	5.1129	1.98087	2.56349	0.0217309	0.964854	-4.43464
Mrps24	-5.83679	1.6543	-2.5614	0.0218207	0.964854	-4.44234
Trp53i13	5.70556	-0.512705	2.55568	0.0220691	0.964854	-4.45144
Nptxr	-3.12249	-3.86004	-2.5525	0.0222085	0.964854	-4.0579
Cep97	5.11801	2.63267	2.55165	0.0222456	0.964854	-4.41436
Rps23	-0.717053	8.26237	-2.55129	0.0222615	0.964854	-3.39986
Lta4h	-4.97468	2.3551	-2.55076	0.0222846	0.964854	-4.42491
Syp	4.96138	-0.195511	2.55042	0.0223	0.964854	-4.45478
Nckap5l	2.3178	5.68711	2.5502	0.0223095	0.964854	-4.0759
Foxn3	2.4081	6.61926	2.54927	0.0223503	0.964854	-3.86088
Msr1	4.90771	-2.50555	2.54901	0.0223621	0.964854	-4.32406
Rplp2	-1.06451	7.61485	-2.54691	0.0224552	0.964854	-3.58624
Foxo1	2.24408	5.91731	2.54415	0.0225776	0.964854	-4.03018
Uhmk1	-3.65804	3.48512	-2.54389	0.0225897	0.964854	-4.36844
BC037032	-4.6235	-2.52959	-2.54295	0.0226315	0.964854	-4.3222
Dynlrb1	-2.38593	4.55248	-2.54263	0.0226459	0.964854	-4.26491
Atp5f1	-2.59327	4.40774	-2.54058	0.0227375	0.964854	-4.28315
Zmynd10	-2.91146	-3.89144	-2.53972	0.0227764	0.964854	-4.05474
Pld1	0.984471	7.91261	2.53866	0.0228242	0.964854	-3.50843
Zkscan4	-6.01511	-0.575011	-2.53671	0.0229122	0.964854	-4.45261
Myo6	3.32007	1.88568	2.53501	0.0229893	0.964854	-4.44017
Rsu1	1.44608	6.52652	2.53358	0.0230541	0.964854	-3.89314
Zfp867	-4.89746	-0.676868	-2.5311	0.0231672	0.964854	-4.45184
Nlgn2	-4.64431	-0.26404	-2.531	0.0231718	0.964854	-4.45623
Rbm44	-4.62458	-2.83763	-2.52825	0.0232977	0.964854	-4.28253
Sacs	-3.83839	-3.21467	-2.52706	0.0233525	0.964854	-4.21859
4933400F21Rik	-4.44681	-0.75965	-2.52693	0.0233586	0.964854	-4.4509
Scrn2	-3.00982	-3.41223	-2.52422	0.0234837	0.964854	-4.17931
Haao	-4.44487	-3.00553	-2.52306	0.0235375	0.964854	-4.25705
Mbtd1	1.89274	6.18618	2.52281	0.0235492	0.964854	-3.97996
Prpf8	-1.03478	7.85718	-2.52216	0.0235794	0.964854	-3.53888
4933406I18Rik	-2.61396	2.42532	-2.51927	0.0237142	0.964854	-4.42631
Ybx1	-1.6705	6.33871	-2.51731	0.023806	0.964854	-3.94727
Ppip5k2	1.50845	5.39433	2.51588	0.023873	0.964854	-4.144
Rbm17	2.87446	4.85655	2.51568	0.0238826	0.964854	-4.23058
Kcnq1ot1	0.889725	8.29083	2.51467	0.0239301	0.964854	-3.43032
Dclk2	-6.00367	-0.651981	-2.51311	0.0240039	0.964854	-4.45402
Gm17066	1.0162	6.80503	2.51245	0.024035	0.964854	-3.83446
Papd5	-1.28986	6.61841	-2.51221	0.0240463	0.964854	-3.88203
Ptges3	-1.40371	5.76249	-2.51035	0.0241347	0.964854	-4.07627
Rapgef1	-1.71943	7.81234	-2.50982	0.0241599	0.964854	-3.56228
Cacng7	4.1266	-3.24543	2.5083	0.0242323	0.964854	-4.21796
AU022252	5.59139	-1.42474	2.5056	0.0243614	0.964854	-4.42745
Cdh10	-2.62338	-3.93095	-2.50327	0.0244734	0.964854	-4.06115
Pim1	-4.7058	-2.22554	-2.50107	0.0245797	0.964854	-4.36458
Slc35b3	3.90373	1.29144	2.49949	0.0246563	0.964854	-4.4548
Emc7	3.04824	4.88163	2.49926	0.0246674	0.964854	-4.23146
Ccdc8	-2.5862	-3.93585	-2.49723	0.0247661	0.964854	-4.06268
Nck1	-4.46818	1.85204	-2.49579	0.0248364	0.964854	-4.44526
Snrpg	2.73126	3.51065	2.49361	0.0249433	0.964854	-4.37481
Gm13710	4.33955	-0.750127	2.49286	0.0249799	0.964854	-4.45457
1700037C18Rik	-3.34277	-2.95051	-2.49014	0.0251141	0.964854	-4.27408
Pten	0.684266	8.90192	2.48923	0.025159	0.964854	-3.32783
Tlcd1	4.01195	-3.4038	2.48863	0.0251889	0.964854	-4.19211
Cd34	-1.44043	6.95538	-2.48793	0.0252235	0.964854	-3.81096
Rbm14	-3.47057	4.55166	-2.48718	0.0252606	0.964854	-4.27829
AI597479	-5.27329	1.88544	-2.48702	0.0252688	0.964854	-4.44547
Ccdc96	-5.44073	-1.39961	-2.48498	0.0253704	0.964854	-4.43141
Slc8a3	-3.07907	-3.52508	-2.48449	0.0253946	0.964854	-4.16721
Slc5a10	-3.41703	-2.40914	-2.48409	0.0254144	0.964854	-4.34786
Nhlrc3	-4.00045	2.34315	-2.48283	0.0254777	0.964854	-4.43345
Hspa1l	-2.81576	-3.24627	-2.48208	0.0255149	0.964854	-4.22522
Smpdl3a	4.3698	1.9749	2.47927	0.0256563	0.964854	-4.4442
Nagpa	-3.58119	4.99951	-2.4787	0.0256851	0.964854	-4.22005
Raph1	5.72958	3.00788	2.47527	0.0258589	0.964854	-4.4074
Eif4h	-1.60064	6.72585	-2.47009	0.026123	0.964854	-3.87978
Tmem230	3.64392	5.32607	2.46787	0.0262371	0.964854	-4.17189
Ergic1	2.0945	5.87997	2.46739	0.0262621	0.964854	-4.07025
Pja1	-4.32469	2.66694	-2.46629	0.0263186	0.964854	-4.42391
Taf1a	-5.19902	1.27353	-2.46551	0.0263589	0.964854	-4.45852
Cisd1	-5.62279	0.392526	-2.46371	0.026452	0.964854	-4.46479
Ei24	-5.00423	2.37132	-2.4632	0.0264788	0.964854	-4.4349
Stmn1-rs1	6.40514	-0.984825	2.46296	0.026491	0.964854	-4.45197
Cntn3	-2.46272	-3.72206	-2.46019	0.0266353	0.964854	-4.12927
Gm1943	2.85636	-3.14307	2.45881	0.0267076	0.964854	-4.25026
Trmt6	4.23558	2.74124	2.45821	0.0267389	0.964854	-4.42193
Mms19	-2.67547	5.16445	-2.45793	0.0267538	0.964854	-4.20116
D5Ertd605e	-5.0651	-2.29817	-2.45744	0.0267794	0.964854	-4.36468
Trove2	3.41624	3.95979	2.45718	0.0267931	0.964854	-4.34621
Igbp1	5.30288	3.45631	2.45571	0.0268703	0.964854	-4.38459
Reps1	-3.38705	4.14354	-2.45544	0.0268846	0.964854	-4.32971
Prdx5	4.47453	3.06304	2.45414	0.0269532	0.964854	-4.40763
Herc2	0.589893	8.66535	2.45347	0.0269888	0.964854	-3.41348
Ftsj2	-2.25637	-3.72537	-2.45307	0.0270097	0.964854	-4.13108
Grb2	-2.20332	6.43662	-2.45126	0.0271057	0.964854	-3.95858
Ssr2	-3.40026	3.65525	-2.44956	0.0271962	0.964854	-4.3719
Eml6	-4.11405	2.70628	-2.44933	0.0272085	0.964854	-4.42452
Rttn	4.7979	3.84714	2.44881	0.0272362	0.964854	-4.35726
Hbs1l	-2.67276	4.30672	-2.44791	0.0272844	0.964854	-4.31493
Fbxl4	2.66806	4.53483	2.44756	0.0273031	0.964854	-4.28977
Esco1	1.52894	5.85022	2.44645	0.0273622	0.964854	-4.08482
Ppp4r2	1.22103	6.01468	2.44606	0.027383	0.964854	-4.05217
Mrc2	-5.80058	2.49861	-2.44318	0.027538	0.964854	-4.43309
Ascc1	-3.51633	1.20931	-2.443	0.0275476	0.964854	-4.46162
Atpaf1	-5.2833	1.77198	-2.44263	0.0275678	0.964854	-4.45276
Cipc	4.1259	3.34078	2.44104	0.0276535	0.964854	-4.39414
Csnk1g1	1.97353	5.96974	2.43815	0.0278103	0.964854	-4.06471
Gpam	-4.6453	1.02392	-2.43454	0.0280077	0.964854	-4.46443
Ctdsp1	1.99525	5.87297	2.43433	0.0280192	0.964854	-4.08543
Klhl35	2.45681	-3.50091	2.43279	0.0281038	0.964854	-4.18943
Tcp11l1	-4.02378	2.09382	-2.43223	0.0281347	0.964854	-4.44656
Tnfaip1	-2.55372	5.06121	-2.43164	0.0281667	0.964854	-4.22472
Numa1	-1.39686	7.45899	-2.43095	0.0282048	0.964854	-3.72149
Srpk2	-2.82502	4.59809	-2.43011	0.0282514	0.964854	-4.28651
Gpld1	-5.19848	2.93019	-2.43004	0.028255	0.964854	-4.41745
Gmds	4.1996	-0.716218	2.4292	0.0283019	0.964854	-4.46169
Abhd16a	-5.05573	2.23666	-2.42741	0.0284007	0.964854	-4.44327
Rabac1	1.40607	5.8464	2.42713	0.0284163	0.964854	-4.09353
Aqr	1.96129	5.80134	2.42654	0.028449	0.964854	-4.10232
L1cam	1.86765	-3.91015	2.4259	0.0284846	0.964854	-4.09689
BC002163	-4.42485	1.07004	-2.42563	0.0285	0.964854	-4.46488
Lrrtm3	-2.87603	-3.52832	-2.42531	0.0285176	0.964854	-4.18607
BC051142	5.1338	-2.4126	2.42115	0.0287502	0.964854	-4.35918
Pdcd5	-2.64952	4.12678	-2.42068	0.0287765	0.964854	-4.33839
Pi4k2a	1.65132	5.27976	2.42064	0.0287792	0.964854	-4.19491
Polr1a	1.79609	5.51012	2.41885	0.0288799	0.964854	-4.15764
Pclo	5.23628	0.592099	2.41831	0.0289104	0.964854	-4.46878
Fgfr1op	-4.50458	4.43847	-2.41821	0.028916	0.964854	-4.30751
1700047A11Rik	-2.16692	-3.99203	-2.41778	0.02894	0.964854	-4.0862
Bub1b	4.66568	-1.05479	2.41696	0.0289866	0.964854	-4.45474
Skil	0.832852	8.81168	2.41513	0.0290907	0.964854	-3.43295
Arf2	-2.34924	4.47514	-2.41438	0.0291333	0.964854	-4.30437
Xpot	1.47157	6.12619	2.41377	0.029168	0.964854	-4.04404
Col6a3	-4.61538	3.30682	-2.41343	0.0291872	0.964854	-4.40041
Zfc3h1	-0.910782	8.2594	-2.41226	0.029254	0.964854	-3.54317
Tfdp2	-4.52953	2.64467	-2.41178	0.0292811	0.964854	-4.43179
Abcg1	1.63926	7.1468	2.41021	0.0293711	0.964854	-3.81473
B3gat2	-4.00654	0.536058	-2.40973	0.0293987	0.964854	-4.4698
Gm9776	5.31468	0.78205	2.4095	0.029412	0.964854	-4.46874
Tmc6	-5.19657	2.96079	-2.40824	0.0294844	0.964854	-4.41905
Hoxb4	-5.84495	-1.40053	-2.40774	0.0295131	0.964854	-4.44074
Kif3a	3.74037	4.48975	2.40646	0.0295869	0.964854	-4.3046
Eno2	-2.527	-3.49109	-2.40587	0.0296209	0.964854	-4.20023
Stra8	-2.05855	-3.63489	-2.40566	0.0296328	0.964854	-4.16946
Tmem167b	3.86968	3.98303	2.40546	0.0296448	0.964854	-4.35414
Bcr	-5.80849	1.03345	-2.40527	0.0296556	0.964854	-4.46728
Gm5475	-2.10813	-4.00006	-2.40501	0.0296707	0.964854	-4.09027
Calm2	-0.735622	9.41132	-2.40345	0.0297612	0.964854	-3.38709
Vps29	3.23258	3.52612	2.40247	0.0298179	0.964854	-4.38872
Nudc	-4.69594	2.04964	-2.40226	0.0298302	0.964854	-4.4511
Cela1	-2.99677	-3.54139	-2.402	0.029845	0.964854	-4.19104
Psenen	2.12806	6.38995	2.40042	0.0299371	0.964854	-3.99532
Pecr	-4.6895	1.05449	-2.39978	0.0299745	0.964854	-4.46763
Ctnna1	2.54363	4.96802	2.39797	0.0300805	0.964854	-4.24768
Ddhd1	3.24501	4.08276	2.39748	0.0301091	0.964854	-4.34706
Fam173a	3.0287	4.94819	2.39493	0.0302592	0.964854	-4.25124
9930111J21Rik2	3.26144	5.23346	2.39464	0.0302767	0.964854	-4.21043
Xlr3b	5.24471	1.33356	2.39458	0.0302799	0.964854	-4.46504
Pih1d2	2.255	-3.80635	2.39351	0.0303431	0.964854	-4.13372
Vcpip1	-2.09597	6.75405	-2.39156	0.0304588	0.964854	-3.91964
Zcchc9	-2.24175	4.5621	-2.39119	0.0304806	0.964854	-4.30014
Rbm48	3.58084	2.25372	2.39006	0.0305476	0.964854	-4.44719
Ubr3	1.12511	7.25065	2.38985	0.0305601	0.964854	-3.80388
Nono	1.29472	7.02523	2.38959	0.0305759	0.964854	-3.85788
Myadml2	-5.9259	-0.110822	-2.38898	0.0306118	0.964854	-4.47116
Tmem42	-5.28725	-0.0250074	-2.38885	0.0306199	0.964854	-4.47156
Vps45	-4.18197	1.54009	-2.38344	0.0309439	0.964854	-4.46325
Tmem86b	-4.33253	1.00923	-2.38201	0.0310303	0.964854	-4.46984
Pdzk1	4.11636	-1.16205	2.38113	0.0310836	0.964854	-4.45473
Hmha1	-0.971791	8.83881	-2.3809	0.0310969	0.964854	-3.47001
Gm16287	-1.85982	-3.69698	-2.3798	0.0311637	0.964854	-4.16471
Fth1	-0.507512	9.38247	-2.37845	0.0312458	0.964854	-3.42266
Phldb1	-5.30076	-0.504639	-2.37769	0.0312922	0.964854	-4.46947
Yipf6	-2.31878	6.00765	-2.37635	0.0313734	0.964854	-4.08432
Ankrd53	3.27419	-3.33907	2.37457	0.0314822	0.964854	-4.23933
Aamp	3.43474	4.36934	2.37378	0.031531	0.964854	-4.32485
Ntpcr	-1.34651	6.5335	-2.37157	0.0316665	0.964854	-3.97984
Rpl23a	1.13757	7.29074	2.37152	0.0316696	0.964854	-3.80758
Usp5	4.82681	0.836238	2.37027	0.0317468	0.964854	-4.47229
B4galnt2	-4.11517	-2.3465	-2.3688	0.0318377	0.964854	-4.37563
Tbc1d15	2.75577	5.26494	2.3676	0.0319116	0.964854	-4.21436
Orc3	0.746433	8.17846	2.36759	0.0319126	0.964854	-3.60573
Tef	3.88723	3.76474	2.3663	0.0319927	0.964854	-4.37854
1700009P17Rik	4.07627	-2.36395	2.36262	0.0322217	0.964854	-4.37502
Chst7	3.87846	3.22085	2.36217	0.0322497	0.964854	-4.4129
Pitrm1	3.40501	3.88897	2.36075	0.0323392	0.964854	-4.37026
B630005N14Rik	1.87607	5.33902	2.35998	0.0323872	0.964854	-4.20564
Prkci	3.55544	3.51565	2.359	0.0324493	0.964854	-4.39655
Crnkl1	-3.78151	4.14487	-2.35877	0.0324633	0.964854	-4.34939
Wdr4	-4.15451	1.03311	-2.35639	0.0326137	0.964854	-4.4722
Zbtb34	1.876	7.11738	2.35162	0.0329172	0.964854	-3.86199
Cubn	-3.00574	-2.69925	-2.34814	0.0331398	0.964854	-4.34114
Ang	1.11748	6.95654	2.34756	0.0331773	0.964854	-3.90108
Eef2	-0.748923	8.51653	-2.34747	0.033183	0.964854	-3.56039
5730480H06Rik	4.88413	-1.48602	2.34731	0.033193	0.964854	-4.44367
Gamt	-5.08984	-1.81123	-2.34717	0.0332021	0.964854	-4.42371
Pigk	-2.32733	5.46349	-2.34626	0.0332608	0.964854	-4.19104
Cd5l	-5.26695	-1.29005	-2.34339	0.0334466	0.964854	-4.45391
Tshz1	-4.24543	2.79579	-2.34302	0.0334702	0.964854	-4.43497
Bmyc	2.54017	7.08758	2.34279	0.0334855	0.964854	-3.87475
Prkar2a	-4.74585	1.85784	-2.34199	0.0335369	0.964854	-4.46209
2010009K17Rik	-1.86735	-3.82681	-2.34129	0.0335828	0.964854	-4.14939
Alms1-ps2	-2.35952	-3.8841	-2.34065	0.0336243	0.964854	-4.13715
Kif24	-2.59184	-2.38051	-2.34045	0.0336376	0.964854	-4.37743
Mtx3	2.23463	6.39299	2.33889	0.0337393	0.964854	-4.02639
Fbxl5	-1.65045	4.32495	-2.33874	0.0337486	0.964854	-4.33699
Napa	2.42941	4.1746	2.33676	0.0338786	0.964854	-4.35128
Fau	1.13663	7.68687	2.33669	0.033883	0.964854	-3.74289
B230118H07Rik	-4.23544	2.24483	-2.33522	0.0339795	0.964854	-4.45392
Gstp2	3.46631	0.011561	2.33488	0.0340022	0.964854	-4.477
Aplp2	-2.81198	4.82052	-2.33442	0.0340321	0.964854	-4.28427
Hbegf	-4.11081	-2.65532	-2.33427	0.0340421	0.964854	-4.34926
Cpeb3	-4.54679	-0.500315	-2.33203	0.03419	0.964854	-4.47414
Optn	-3.09719	-3.41286	-2.33202	0.0341906	0.964854	-4.23884
Sufu	-4.37618	2.31564	-2.3296	0.0343511	0.964854	-4.45266
6330403A02Rik	2.09061	-3.85123	2.32943	0.0343622	0.964854	-4.14881
Acbd3	-2.49135	5.82303	-2.3287	0.0344108	0.964854	-4.13815
Fam49a	2.55359	4.65478	2.32797	0.0344597	0.964854	-4.30525
Prkdc	1.65088	6.18846	2.32785	0.0344677	0.964854	-4.07198
Armcx5	-4.70995	-0.184751	-2.3275	0.0344911	0.964854	-4.47689
Gtf2e2	4.14285	1.23354	2.32746	0.034494	0.964854	-4.47315
Wdsub1	-5.24828	0.681914	-2.32673	0.0345422	0.964854	-4.47744
Smim24	-4.29098	-2.53155	-2.32416	0.0347146	0.964854	-4.36505
Atp1a1	-2.60547	5.52966	-2.32395	0.0347285	0.964854	-4.18854
Inppl1	-4.7005	2.00584	-2.32287	0.0348015	0.964854	-4.46113
Pak2	-0.975914	7.21544	-2.32172	0.0348784	0.964854	-3.86063
Ube2v1	-3.58206	5.04083	-2.3217	0.0348802	0.964854	-4.25999
Pde4d	-4.33929	1.86624	-2.32133	0.0349048	0.964854	-4.46421
4930426L09Rik	-3.77732	-2.01369	-2.32105	0.0349241	0.964854	-4.41277
BC024978	-4.19569	4.03004	-2.32044	0.0349651	0.964854	-4.3668
Trim32	-5.61439	1.74524	-2.32035	0.0349709	0.964854	-4.46657
Parp8	-2.09537	7.15191	-2.31926	0.035045	0.964854	-3.87646
Mrpl44	-4.45831	1.50024	-2.31829	0.0351103	0.964854	-4.47073
Pigh	-5.02766	2.80606	-2.31716	0.0351875	0.964854	-4.43803
Apba3	-5.14131	0.422123	-2.31514	0.0353249	0.964854	-4.47932
Mtbp	-4.54231	2.00072	-2.31488	0.0353429	0.964854	-4.46214
Tuba1a	-1.71248	6.83319	-2.31396	0.0354054	0.964854	-3.94904
Sfxn3	-4.19309	4.60851	-2.3139	0.0354098	0.964854	-4.31384
Vipas39	-3.92978	3.47303	-2.31376	0.0354189	0.964854	-4.40651
Uap1l1	-4.35728	4.2318	-2.31211	0.0355325	0.964854	-4.35136
Mrpl28	-4.71739	1.0646	-2.3121	0.0355325	0.964854	-4.47639
Sec24b	1.28024	7.32402	2.31101	0.035608	0.964854	-3.84431
Ric8	-2.60226	4.42539	-2.30998	0.0356788	0.964854	-4.33367
Mau2	2.39067	5.8103	2.30989	0.0356844	0.964854	-4.14798
Slc27a1	5.65736	0.521563	2.30825	0.0357977	0.964854	-4.47981
Gemin6	-5.15255	-0.466537	-2.30754	0.0358471	0.964854	-4.47693
Rbm39	0.74299	8.59986	2.30559	0.0359818	0.964854	-3.59306
Xpo7	1.56095	6.60076	2.30465	0.0360477	0.964854	-4.00273
Wdr3	3.65554	3.33067	2.30412	0.0360842	0.964854	-4.41597
BC147527	-4.47971	-1.58707	-2.30297	0.0361647	0.964854	-4.44379
Exosc7	3.81456	0.934622	2.30189	0.0362399	0.964854	-4.47845
Scfd2	3.8845	1.00842	2.30172	0.0362513	0.964854	-4.47792
Cdh11	-3.47631	-1.0312	-2.30103	0.0362997	0.964854	-4.46817
Ccdc69	-2.33256	-3.69782	-2.30042	0.0363427	0.964854	-4.19345
Tmem81	-4.96134	-1.89073	-2.30009	0.0363659	0.964854	-4.42502
2210016L21Rik	-4.61123	2.02059	-2.29853	0.0364755	0.964854	-4.46357
B2m	0.58666	11.3943	2.29764	0.0365381	0.964854	-4.0933
Psmd3	-3.42662	3.44261	-2.29435	0.0367705	0.964854	-4.41137
[truncated: 21,784 more rows]

## Sheet: 16p11dup-THC vs 16p11dup-Veh
Supplementary Data 2: Differential expression gene list
[truncated: 22,430 more rows]
