# Supplementary material for: Microglial cannabinoid receptor type 1 mediates social memory deficits in mice produced by adolescent THC exposure and 16p11.2 duplication
Source: Nat Commun. 2023 Oct 25;14:6559. doi: 10.1038/s41467-023-42276-5 (PMC10600150; doi:10.1038/s41467-023-42276-5)
Supplement: Supplementary file 5 — Supplementary Data 3 [file 41467_2023_42276_MOESM5_ESM.xlsx]

## Sheet: Pathway-compared to WT-Veh
Supplementary Data 3a: 16p11dup with THC enriched pathway and upstream regulator compared to WT-Veh
Reactome pathways name	The number of genes in Reference list	The number of genes in analysed list	two-tailed raw P value	FDR
Cdc20:Phospho-APC/C mediated degradation of Cyclin A	71	13	8.48e-06	0.0035
APC:Cdc20 mediated degradation of cell cycle proteins prior to satisfation of the cell cycle checkpoint	72	13	9.69e-06	0.0032
APC/C:Cdc20 mediated degradation of mitotic proteins	74	13	1.26e-05	0.00345
Activation of APC/C and APC/C:Cdc20 mediated degradation of mitotic proteins	75	13	1.43e-05	0.00336
TCR signaling	105	15	2.52e-05	0.00461
APC/C-mediated degradation of cell cycle proteins	82	13	3.3e-05	0.00453
Regulation of mitotic cell cycle	82	13	3.3e-05	0.00494
Regulation of mRNA stability by proteins that bind AU-rich elements	85	13	4.6e-05	0.00584
Asymmetric localization of PCP proteins	61	11	4.7e-05	0.00517
Transcriptional regulation by RUNX2	61	11	4.7e-05	0.00554
Downstream TCR signaling	86	13	5.13e-05	0.00529
Autodegradation of Cdh1 by Cdh1:APC/C	62	11	5.36e-05	0.0052
Stabilization of p53	54	10	8.51e-05	0.00779
APC/C:Cdc20 mediated degradation of Securin	66	11	8.84e-05	0.00768
Degradation of GLI1 by the proteasome	55	10	9.73e-05	0.00803
C-type lectin receptors (CLRs)	107	14	0.000109	0.00857
GLI3 is processed to GLI3R by the proteasome	56	10	0.000111	0.00833
NIK-->noncanonical NF-kB signaling	57	10	0.000126	0.00907
Dectin-1 mediated noncanonical NF-kB signaling	57	10	0.000126	0.00869
CDT1 association with the CDC6:ORC:origin complex	58	10	0.000144	0.00947
Post-translational protein modification	1233	73	0.000145	0.0092
CDK-mediated phosphorylation and removal of Cdc6	71	11	0.000158	0.00963
APC/C:Cdh1 mediated degradation of Cdc20 and other APC/C:Cdh1 targeted proteins in late mitosis/early G1	71	11	0.000158	0.00929
MAPK6/MAPK4 signaling	73	11	0.000196	0.0112
FCERI mediated NF-kB activation	73	11	0.000196	0.0108
The role of GTSE1 in G2/M progression after G2 checkpoint	73	11	0.000196	0.0104
PCP/CE pathway	87	12	0.000214	0.0107
CLEC7A (Dectin-1) signaling	87	12	0.000214	0.0104
Ubiquitin-dependent degradation of Cyclin D	50	9	0.000231	0.0109
Autodegradation of the E3 ubiquitin ligase COP1	50	9	0.000231	0.0106
Regulation of RUNX2 expression and activity	50	9	0.000231	0.0103
Hedgehog ligand biogenesis	62	10	0.000233	0.0101
Axon guidance	258	23	0.000241	0.0102
Switching of origins to a post-replicative state	89	12	0.000259	0.0104
p53-Dependent G1 DNA Damage Response	63	10	0.000261	0.01
p53-Dependent G1/S DNA damage checkpoint	63	10	0.000261	0.0103
Ubiquitin Mediated Degradation of Phosphorylated Cdc25A	51	9	0.000263	0.00943
p53-Independent DNA Damage Response	51	9	0.000263	0.00964
p53-Independent G1/S DNA damage checkpoint	51	9	0.000263	0.00986
Fc epsilon receptor (FCERI) signaling	118	14	0.000275	0.00966
Oxygen-dependent proline hydroxylation of Hypoxia-inducible Factor Alpha	64	10	0.000293	0.0101
Activation of NF-kappaB in B cells	64	10	0.000293	0.00985
G1/S DNA Damage Checkpoints	65	10	0.000327	0.0108
Regulation of RUNX3 expression and activity	53	9	0.000339	0.011
Degradation of AXIN	54	9	0.000383	0.0121
FBXL7 down-regulates AURKA during mitotic entry and in early mitosis	54	9	0.000383	0.0119
Assembly of the pre-replicative complex	67	10	0.000406	0.0124
Degradation of DVL	55	9	0.000432	0.0129
AUF1 (hnRNP D0) binds and destabilizes mRNA	55	9	0.000432	0.0127
TNFR2 non-canonical NF-kB pathway	96	12	0.000483	0.0135
ABC-family proteins mediated transport	96	12	0.000483	0.0137
Cellular response to hypoxia	69	10	0.0005	0.0137
DNA Replication Pre-Initiation	83	11	0.000528	0.0143
Orc1 removal from chromatin	70	10	0.000554	0.0147
Antigen processing: Ubiquitination & Proteasome degradation	291	24	0.000561	0.0147
Innate Immune System	929	56	0.000571	0.0147
Cellular responses to stress	404	30	0.000578	0.0147
Metabolism of polyamines	58	9	0.00061	0.0152
M Phase	353	27	0.000694	0.0168
SCF(Skp2)-mediated degradation of p27/p21	60	9	0.000758	0.0181
Cross-presentation of soluble exogenous antigens (endosomes)	48	8	0.000802	0.0189
G2/M Transition	182	17	0.000834	0.0194
Mitotic G2-G2/M phases	184	17	0.000933	0.0214
Downstream signaling events of B Cell Receptor (BCR)	76	10	0.000983	0.0222
Regulation of ornithine decarboxylase (ODC)	50	8	0.00102	0.0227
L1CAM interactions	64	9	0.00114	0.0252
Neddylation	220	19	0.00117	0.0254
RUNX1 regulates transcription of genes involved in differentiation of HSCs	65	9	0.00126	0.027
Hedgehog 'on' state	79	10	0.00128	0.0271
Transport of Mature Transcript to Cytoplasm	81	10	0.00152	0.0314
Regulation of RAS by GAPs	67	9	0.00153	0.0311
Regulation of PTEN stability and activity	68	9	0.00168	0.0337
EPH-Ephrin signaling	69	9	0.00184	0.0365
Signaling by NTRKs	70	9	0.00201	0.039
Cyclin E associated events during G1/S transition	70	9	0.00201	0.0394
Signal transduction by L1	21	5	0.00203	0.039
Signaling by the B Cell Receptor (BCR)	100	11	0.0021	0.0398
Signaling by NTRK1 (TRKA)	57	8	0.00215	0.0403
Synthesis of DNA	117	12	0.0023	0.0426
Cyclin A:Cdk2-associated events at S phase entry	72	9	0.00239	0.0438
Nuclear Events (kinase and transcription factor activation)	22	5	0.00242	0.0439
ERKs are inactivated	13	4	0.00266	0.0472
Hedgehog 'off' state	104	11	0.00278	0.0487
Class I MHC mediated antigen processing & presentation	349	25	0.00278	0.0482
Separation of Sister Chromatids	182	16	0.00279	0.048
Metabolism of carbohydrates	257	20	0.00285	0.0485
BBSome-mediated cargo-targeting to cilium	23	5	0.00286	0.0482

## Sheet: Pathway-compared to WT-THC
Supplementary Data 3b: 16p11dup with THC enriched pathway compared to WT-THC
Reactome pathways name	The number of genes in Reference list	The number of genes in analysed list	two-tailed raw P value	FDR
Neutrophil degranulation	492	39	0.000149	0.0507
Membrane Trafficking	544	42	0.000188	0.0457
Adaptive Immune System	671	49	0.000166	0.0469
Unclassified	10320	355	6.93e-06	0.0118

## Sheet: Pathway-compared to 16p-Veh
Supplementary Data 3c: 16p11dup with THC enriched pathway compared to 16p11dup-Veh
Reactome pathways name	The number of genes in Reference list	The number of genes in analysed list	two-tailed raw P value	FDR
COPII-mediated vesicle transport	67	11	6.86e-05	0.0194
Neutrophil degranulation	493	43	3.47e-07	0.000295
Innate Immune System	894	57	4.84e-05	0.0206
Class I MHC mediated antigen processing & presentation	348	29	7.19e-05	0.0175
Adaptive Immune System	671	46	5.57e-05	0.0189
Unclassified	10320	295	5.53e-08	9.4e-05

## Sheet: Upstream regulator
Supplementary Data 3d: 16p11dup with THC upstream regulator compared to WT-Veh
Upstream Regulator Name	two-tailed raw p-value	B-H corrected p-value	Target gene name in analysed list
camptothecin	1.37e-07	0.000449	ARAP2,ASNSD1,CASP4,CCR1,CLU,CSNK1D,DUSP6,FLT1,GADD45G,GSDMD,HJURP,HSP90AB1,HSPA9,INPP4A,MEF2C,MYB,MYO6,NFKB2,NLRP1,NRF1,P2RX1,PAK2,PDZD2,PIK3CA,PIK3CG,PLD1,PPFIA1,PRKAB1,PRKCI,PSMD2,PYCARD,RAPGEF5,RBM48,RPL3,SKIL,SPP1,TLR2,TNFAIP1,TSPYL2,TUBB,ZNF324
TP53	3.41e-07	0.000559	ACADM,ACSF2,AK1,AKR1B1,ANAPC4,ARAP2,ARL6IP1,ARVCF,ATG4C,ATP1A1,BUB1B,CAND1,CARD11,CASP4,CAV2,CCNB2,CEP170B,CLTA,CLU,CSF1R,CSNK1D,CTSD,DBF4,DNAJA3,DUSP6,Dync1i2,E2F4,EIF4G3,ETFA,FBXW7,FGFR1,FIGNL1,FKBP1A,FYN,GADD45G,GAS7,HADHB,HJURP,Hmgn2 (includes others),HSP90AB1,IFFO1,INPP4A,IRF5,KMT2D,MAP2K1,MAPK1,MCAT,MTHFD2,MYO6,NDUFS6,NFAM1,NFKB2,NR2C1,NRF1,NUP153,NUPR1,Pcmt1,PDHX,PIK3CG,PLAU,Pln,PLXNB2,PMS…
1,2-dithiol-3-thione	2.26e-06	0.00247	ANG,ATP1A1,CCT3,CCT7,CTSD,EIF3G,GNA11,HMBS,HSP90AB1,LGALS8,PRDX1,PSMB2,PSMB4,PSMD12,PSMD7,PSMD8,UBQLN2,UGT1A6,USO1
RXRB	4.98e-06	0.00408	ACADM,ACOX1,CAMK1D,CLU,CNNM1,DDX60,EEF2,FGFR1,GADD45G,MAP1B,NR2C1,NUPR1,SPP1,THAP1,URB1,VCAN,ZC3H12A
HNF4A	1.38e-05	0.00902	ABCF3,ACOX1,AKR1B1,ANG,ANKRA2,APOB,ARHGAP35,ATG4C,BAG6,BAZ1A,C2orf42,CBLL1,CDK8,CDKAL1,CLTA,CTSZ,DDX10,DNAJA3,DUSP3,DUSP6,E2F4,FAIM2,FANCF,FARSB,FHIT,FYCO1,G6PC3,GADD45G,GGCX,GPATCH3,GTF2I,HADHB,HBS1L,ITGA5,KPTN,LRP5,LUC7L2,LYPLA2,MAP7,MRPL4,MRPS21,MRPS27,N4BP1,NAT10,NCK1,NDUFA7,NONO,NUDCD3,ORC3,PAFAH2,PDZK1,PIGS,PPIL1,PPIP5K2,PPP6C,PRKAB1,PSMC4,PSMD7,PSMD8,R3HDM1,RBM48,RPL10,SART3,SEC11A,SEL1L,S…
MYC	2.65e-05	0.0118	ABCC4,ABCF3,ACADM,AIMP2,Arf2,ARL6IP1,BUB1B,CCNB2,CCT3,CLU,CPD,CSDE1,CSF1R,CTNNA1,CTSD,DDX60,DROSHA,DUSP6,DUSP7,ECSIT,EEF2,EIF3G,EXOSC7,FCGR2A,FGFR1,GADD45G,GOT2,HADHB,Hmgn2 (includes others),HSPA9,IMPACT,JARID2,KCNQ1OT1,LIG3,MAG,MPHOSPH6,MSR1,NAT10,NUDC,PAK2,PFKL,PHF20,PLAU,POLDIP3,RANBP1,RPL10,RPL3,RPL37A,RPS23,SCAMP5,SDCBP,SMAD1,SMOX,SPP1,TFAP4,THAP1,TNFSF13B,TSPAN7,UGT1A3,UGT1A6,YBX1,ZXDB
CSF1	2.84e-05	0.0118	ABCA9,CCR1,CSF1R,CTSD,CX3CR1,ETS2,FCGR2A,GAB3,GAS7,GOT2,IRF5,ITGA5,LYVE1,MSR1,NFKB2,PFKL,PLAU,SPP1,STX12,TLR2,TLR5,TPT1
resiquimod	2.89e-05	0.0118	APOBEC3B,ARPC4,CASP4,CCR1,CSF1R,DDX60,DOCK10,ETS2,FCGR2A,HSP90AB1,NFAM1,NFKB2,PIK3CG,PLAU,PRDX1,PSMB2,PSMB4,PSMC4,PSMD2,PSMD8,PYCARD,SPP1,STX12,TLR2,TNFSF13B,TNIP1,ZC3H12A
MAPT	5.32e-05	0.0194	Anp32a,Arf2,CCT7,CLTA,Cox6c,CTSD,CTSZ,DDX60,EEF2,FKBP1A,FYN,GAS7,GBP5,GOT2,HLA-DRB5,INPP4A,ITGA5,LY9,MAP1B,MAPK1,NDUFS6,NFKB2,PBXIP1,PLAU,PLXNB2,PSMD2,SLC4A2,SYNJ1,TLR2,TOP2B,TPT1,TUBB
ESR2	0.00013	0.0398	ABCC4,ABHD2,ARID4A,CCT3,CCT7,CLU,CNNM1,CTSD,DDX10,DOCK10,EMP3,EXOSC7,FGFR1,KCNJ3,MAP7,MAPK1,MTHFD2,NFKB2,NRF1,NRP2,OTUB2,PCOLCE,PDZK1,PLAU,PSMC4,PSMD7,PTPRM,RAPGEF6,RASSF2,SFXN3,SOX4,SPP1,TBC1D4,TMEM50A,TNFSF13B,UBE2E1,USP1,USP8,XPOT
5-fluorouracil	0.000134	0.0398	ANKRA2,APOBEC3B,CCT3,CLU,CSF1R,CTSD,EEF2,EIF3G,FBXW7,FKBP1A,GOT2,GTF2I,HSP90AB1,PIK3CG,PSMB2,PSMD2,RPL10,RPS23,SPP1,STOM,TSPYL2,XPOT,YBX1
APP	0.000195	0.0504	AK1,Anp32a,ASCC1,CCNB2,CLTA,CLU,Cox6c,CSF1R,CSF2RB,CTSD,DAXX,ETS2,EVL,FBXW7,FCGR2A,FGFR1,FKBP1A,FLT1,FYN,GOT2,HSP90AB1,IRF5,L1CAM,LRP5,MAP1B,MAPK1,MAPKAPK2,MEF2C,MSR1,NDUFS6,NRP2,PIN1,PLAU,PSEN2,PSENEN,PYCARD,RASSF2,RNF144B,SERPINF1,ST3GAL5,TBC1D4,TLR2,TLR5,TOP2B,TPT1,TUBB,VCAN
IND S1	0.0002	0.0504	ETFA,GLOD4,HIBCH,PRDX1,TUBB
RICTOR	0.000246	0.0574	ATP6V1G2,Cox6c,DAXX,NDUFA7,NDUFAB1,NDUFB4,NDUFC2,NDUFS6,PFKL,PSMB2,PSMB4,PSMC4,PSMD12,PSMD2,PSMD6,PSMD7,PSMD8,RPL10,RPS23
copper gluconate	0.000658	0.142	BIVM,FANCF,LIG3,RBM14,USP1
ATN1	0.000692	0.142	ATP1A1,CCNDBP1,CSNK1D,EVL,FBXW7,GAS7,SOX4,SPP1,SPTBN2,THRA,TUBB
PLX5622	0.000746	0.144	ABCA9,ATP6V1G2,CCR1,CSF2RB,CTSD,CX3CR1,FCGR2A,HEXB,HSP90AB1,L1CAM,MALAT1,SERPINF1,SPP1,SPTBN2,TLR2,TNFSF13,TNFSF13B
ALKBH5	0.000875	0.145	CLU,CTSD,EIF4G3,FBXL5,FGFR1,FYN,MYO6,NONO,SLC4A2
CST5	0.000876	0.145	DNAJA3,EMP3,HS2ST1,MAP1B,MEF2C,NDUFC2,NUP107,PRDX1,PRKRA,RNPC3,RRP15,SNX30,SOX4,TOMM22,VCAN,WDR3,WDR77
HTT	0.000907	0.145	ACADM,Anp32a,ATP1A1,ATP8A1,CSF1R,CTSD,DUSP6,EEF2,EMP3,EVL,FBXW7,FGFR1,GADD45G,GAS7,HSP90AB1,HSPA9,KCNIP2,NDUFA7,NDUFB4,NFIB,NRF1,PIK3CA,PSMB4,SCAMP5,SERPINF1,SETDB1,SPP1,SPTBN2,STX12,SYVN1,THRA,TNFSF13,TUBB,UBE3A,YBX1
HIC1	0.000929	0.145	ABHD3,CDO1,LGALS8,MATCAP2,SFXN3,SMPDL3A,SPP1
ciprofloxacin	0.000999	0.149	ABCC4,CCR1,CPD,CSF2RB,CTSD,HSPA9,MAPK1,MSR1,PLXNB2,SPP1
KLF3	0.00119	0.167	AGGF1,ARPC4,CCT3,CEP170B,CTNNA1,DFFA,GALNT1,GPSM1,HEXB,MCAT,NEURL3,PARP3,PDE7A,PSMB2,PSMD7,RBM48,RNF166,SMPDL3A,TATDN2,ZC2HC1A
HERC2	0.00126	0.167	FBXL5,PYCARD,USP16
gentamicin	0.00131	0.167	ACADM,AGMO,AK1,ASNSD1,CAND1,CDO1,CIPC,CLU,CTSD,EXTL3,JMY,NEURL3,NUDC,NUP58,PTPRM,SART3,SOX4,SPP1,SYNJ1,TUBB
FAS	0.00133	0.167	ARAP2,CCR1,FAIM2,FLT1,GADD45G,INPP4A,MEF2C,NLRP1,P2RX1,PAK2,PIK3CA,PIK3CG,PLAU,PLD1,PPFIA1,PRKAB1,PRKCI,RAPGEF5,SKIL,SPP1,TLR2
Immunoglobulin	0.00148	0.179	BSCL2,C17orf99,CASP4,CLU,CSF1R,CSF2RB,CTSD,CTSZ,CX3CR1,DUSP6,ETS2,FAIM2,FCGR2A,FYN,G6PC3,GAS7,GBP5,GPSM1,HELZ2,HEXB,HLA-DRB5,IRF5,MEF2C,MTHFD2,MYB,NDUFA7,NDUFB4,NDUFS6,NFKB2,NLRP1,PCOLCE,PFKL,PICALM,PIK3R6,PLAU,PRDX1,PYCARD,SMOX,SPP1,TLR2,TNFSF13,TNFSF13B,USP38,VCAN
poly rI:rC-RNA	0.00173	0.196	Anp32a,CCNB2,CCR1,CCT7,CHD7,COQ9,DAXX,DDX60,GBP5,HELZ2,HLA-DMB,HSPA9,IRF5,ITGA5,MSR1,MYB,N4BP1,NFKB2,NUP153,PARG,PLAU,PSEN2,RNPC3,RPL3,SLC25A46,TLR2,TLR5,TNFSF13,TNFSF13B,TNIP1,Trim12a,UBE3A,VPS54,YIPF1,ZC3H12A
TRAPPC1	0.00205	0.196	EDEM2,HSP90AB1,SEL1L,SSR3,SVIP,SYVN1,UBE2J2,UBQLN2
prostaglandin J2	0.00213	0.196	PSMB2,PSMB4,PSMD12,PSMD6,PSMD8
NCSTN	0.00213	0.196	CSF1R,CSF2RB,FCGR2A,PSEN2,PSENEN
BDNF	0.00216	0.196	ACOT7,ARVCF,CAV2,DUSP6,EEF2,KCNIP2,MAG,MALAT1,MAP1B,MAPK1,MYO6,PLXNB2,PRSS12,RPL37A,RPS23,SPP1,THRA,Ubb,USO1
IL3	0.00223	0.196	ACOX1,CSF1R,EIF3G,ELAVL3,EMP3,FCGR2A,FGFR1,GADD45G,HSPA9,LY9,PFKL,PSMC4,RANBP1,RPL10,RPL3,SOX4,TLR2,Ubb,YBX1
topotecan	0.0023	0.196	ANKMY2,ARL6IP1,CACNA1C,CAMK1D,CHD1,EXOC6B,FHIT,MAPK1,MYB,NFKB2,NUP153,PSEN2,PTPRM,SON,SOX4,TUBB,UBE3A,USP1,YBX1
garcinol	0.00236	0.196	ARHGAP35,BAZ1A,BUB1B,CASP4,FAIM2,GTF2I,MEF2C,TPT1
Z-LLL-CHO	0.00237	0.196	AKR1B1,ATP1A1,BUB1B,CHD1,CLU,DROSHA,HSPA9,MYB,NFKB2,PAK2,PIN1,PMS2,PSMC4,PSMD12,PSMD2,PSMD6,RANBP1,UBE3A,WDR24,WWTR1
GABA	0.00238	0.196	ACADM,ATP1A1,B4GALT6,Ccl27a,CHPT1,DOLK,EIF2AK4,HIBCH,IDS,MAPK1,MTHFD2,NDUFB4,NT5C3A,PRDX1,PRICKLE1,PTPRM,RPL37A,SF3A3,ST3GAL5,UBQLN2,UPF1,WDR3
IL4	0.00238	0.196	ACOX1,C17orf99,CAMK1D,CAND1,Ccl27a,CCR1,CCT3,CSF1R,CSF2RB,CTNNA1,DDHD1,DOCK10,EIF3G,FCGR2A,FLT1,FYCO1,GADD45G,GALK2,GBP5,HLA-DMB,HLA-DRB5,IRF5,KDM6B,LIG3,MAP2K1,MAPK1,MAPKAPK2,MSR1,NFKB2,NT5C3A,PFKL,PIK3R6,PIN1,PLAU,PLD1,PPP6C,PSMG1,RPUSD3,SLC4A7,SON,SPP1,TFAP4,TLR2,TMED8,TNIP1,USO1,XPOT,ZC3H12A,Zfp119a,ZZZ3
disulfiram	0.00242	0.196	BIVM,FANCF,LIG3,RBM14,USP1
MKNK1	0.00245	0.196	4933406I18Rik,ACOT7,ARVCF,CLU,Gm16897,MALAT1,MAP1B,MAPK1,MYO6,PLXNB2,THRA,USO1
EIF2AK3	0.00249	0.196	ANG,Arf2,ETS2,HSPA9,NFKB2,NUPR1,SEL1L,Slc35a2,SYS1,SYVN1,USO1
lipopolysaccharide	0.00251	0.196	9930111J21Rik1/Gm12185,ABCC4,ACADM,ADRA2A,ANKMY2,ANXA7,APOB,APOBEC3B,Arf2,ARVCF,ATP1A1,CARD11,CASP4,CBLB,Ccl27a,CCNB2,CCR1,CHD7,COG2,CSF1R,CSF2RB,CX3CR1,DAXX,DDX60,DIDO1,DOCK10,EDEM2,EEF2,ETS2,FLT1,FYN,GADD45G,GBP5,GCNT2,GPSM1,GSDMD,HADHB,HLA-DMB,HLA-DOB,HLA-DRB5,Hmgn2 (includes others),IRF5,ITGA5,LYVE1,MAPK1,MEF2C,MSR1,MTHFD2,MYB,MYH14,MYO9A,NCK1,NEK6,NFKB2,NRP2,NT5C3A,NUPR1,OXCT1,PARP3,PCOLCE,P…
HIVEP1	0.00278	0.211	CARD11,NFKB2,PIK3R6,TLR5,TNFSF13B,TNIP1
CLOCK	0.003	0.211	ACOX1,CPD,LGALS8,LIG3,NR2C1,PICALM,SEL1L,SERINC5,SLC39A12,ST3GAL5,STX12,TNFAIP1,TOR1B,UHMK1,ZZZ3
HSF2	0.00306	0.211	CCT3,CCT7,CLU,PSMB2,PSMC4
Z-DEVD-FMK	0.00311	0.211	MEF2C,PDZD2,PLD1
ETS2	0.00311	0.211	CSF1R,DUSP6,FLT1,MGAT5,MSR1,PLAU,SPP1
CCND1	0.00312	0.211	ABCC4,DONSON,E2F4,FGFR1,HJURP,KDM6B,KLHL24,NRF1,PTBP3,RAB3B,RPL10,SOX4,SPP1,STOM,SVIP,TUBB,VPS54,YLPM1
PSEN1	0.0032	0.211	2700097O09Rik,Anp32a,CLTA,Cox6c,CTSD,CTSZ,FBXW7,FKBP1A,GOT2,IMPACT,IRF5,L1CAM,MAPK1,MSR1,NDUFS6,NUPR1,PSEN2,PSENEN,TOP2B,TPT1,TUBB
TGFB1	0.00323	0.211	ADRA2A,AFM,AK1,AP3S1,APOB,ARHGAP35,ATG14,BUB1B,CAPRIN1,CASP4,CAV2,CCNB2,CCR1,CLU,CSF1R,CTSD,CX3CR1,DAXX,ECE1,EIF4H,FGFR1,FLT1,FYN,FZD5,GAS7,HEXB,HLA-DRB5,HLTF,ITGA5,KCNJ3,KDM6B,L1CAM,LYVE1,MALAT1,MAP1B,MAP2K1,MAPK1,MAPKAPK2,MEF2C,MGAT5,MLXIP,MSR1,MTHFD2,MYB,NFIB,NFKB2,NRBP1,NUP153,NUPR1,PARP3,PDE7A,PFKL,PLAU,PRICKLE1,PSMG1,PYCARD,RHBDD1,SERPINF1,SKIL,SLC4A2,SOX4,SPP1,ST3GAL5,STRAP,TFAP4,TLR2,TNFS…
LMO2	0.00334	0.211	CASP4,FZD5,GALNT1,GBP5,JARID2,MEF2C,NLRP1,OXCT1,P2RX1,PDZD2,RAB32,RAPGEF5,SERPINF1,SMOX,TLR2,ZNF518B
mibolerone	0.00335	0.211	CHPT1,CLTA,CLU,FKBP1A,GADD45G,GOT2,HEXB,SMPDL3A,UFM1,USO1
cisplatin	0.00359	0.222	ABCC4,ACADM,ACOX1,APOBEC3B,ASCC1,ASRGL1,ATG14,CCR1,CDO1,CLU,DUSP6,ECE1,EMP3,FANCF,FBXW7,FCGR2A,FLT1,FYN,GOT2,HJURP,HSPA9,L1CAM,NAT10,NONO,PFKL,PIK3CA,PIN1,PLXNB2,PRKAB1,REV3L,RNF144B,SMOX,SPP1,TUBB,UGT1A3,UGT1A6,VPS54,YBX1
NUP133	0.00381	0.223	NUP107,NUP153
UFD1	0.00381	0.223	NFKB2,TNFSF13B
NPLOC4	0.00381	0.223	NFKB2,TNFSF13B
miR-291a-3p (and other miRNAs w/seed AAGUGCU)	0.00397	0.228	BAZ1A,C9orf78,FYCO1,LUC7L2,NUP58,TFAP4,TMEM9B,TNFAIP1
LDB1	0.00435	0.245	CASP4,FZD5,GALNT1,GBP5,JARID2,MEF2C,NLRP1,OXCT1,P2RX1,PDZD2,RAB32,RAPGEF5,SERPINF1,SMOX,TLR2,ZNF518B
vancomycin	0.00449	0.249	AGMO,AK1,CLU,EMP3,EXTL3,FCGR2A,HJURP,JMY,PTPRM,SOX4,SPP1,SYNJ1,TUBB
DTX1	0.00471	0.252	DUSP6,NAE1,SPP1,UHMK1
interferon beta-1a	0.00473	0.252	BUB3,CSF1R,FKBP1A,GBP5,HLA-DRB5,MRPL20,PIN1,RPL3,TNFSF13B
PTPRR	0.00476	0.252	FYCO1,ITGA5,LENG1,PBXIP1,PFKL,PLXNB2,TNFAIP1,TNIP1
miR-150-5p (and other miRNAs w/seed CUCCCAA)	0.00495	0.257	CSF1R,MALAT1,MYB
IFNG	0.00502	0.257	ADRA2A,ANKS1A,ARAP2,ATP1A1,BUB1B,CASP4,Ccl27a,CCR1,CSF1R,CSF2RB,CTSD,CTSZ,CX3CR1,DAXX,DDX60,E2F4,ECE1,ETS2,FANCF,FCGR2A,FKBP1A,FLT1,GBP5,GGA1,GSDMD,HLA-DMB,HLA-DOB,HLA-DRB5,Hmgn2 (includes others),HSP90AB1,IRF5,ITGA5,KCNQ1OT1,MAP2K1,MSR1,MTHFD2,MYB,MYO6,NEURL3,NFKB2,NUPR1,PELP1,PFKL,PLAU,PLD1,PSEN2,PSMB2,RFXANK,SEC11A,SLC4A2,SMAD1,SPP1,TLR2,TLR5,TNFSF13,TNFSF13B,TSPAN33,UBE2E1,YLPM1
KLF6	0.00538	0.268	ACADM,CASP4,CCR1,COG2,CSF2RB,ETS2,HIBCH,ITGA5,KDM6B,NFKB2,PFKL,PLAU,TNIP1,VCAN,ZC3H12A
filgrastim	0.0054	0.268	ATP1A1,CATSPER2,CLU,CPD,CSF1R,DDHD1,ETS2,GBP5,HLA-DMB,HLA-DRB5,HLTF,HSPA9,JARID2,LGALS8,MEF2C,MLXIP,MYB,SMPDL3A,SPP1,THRA,TLR5
SETD2	0.00572	0.272	ANG,CSNK1D,FLT1,MEF2C,SERPINF1
PTEN	0.00581	0.272	ABCA9,ABCC4,ACOX1,CCNB2,CHD1,CLTA,CTNNA1,CTSZ,CX3CR1,ETS2,FGFR1,FLT1,GTF2I,HADHB,HEXB,KLHL24,L1CAM,MYO6,NDUFB4,NEU1,OTUB2,PFKL,PLAU,PLXNB2,SMAD1,SMOX,SOX4,SPP1,STOM,SYNJ1,TEP1,TNFAIP1,WIPI2
TCF4	0.00595	0.272	CASP4,CCNB2,EXOSC7,FARSB,Hmgn2 (includes others),MEF2C,NANOS1,NDUFB4,PDZK1,PIK3CA,PIK3CG,SERINC5,SERPINF1,SMAD1,TNFSF13B,TSR1,UBE3A,ZNF467
ARID1A	0.00603	0.272	ARVCF,CCNB2,FZD5,HIBCH,ITGA5,L1CAM,LRP5,MEF2C,MMS19,MYO6,NUP35,PTGFRN,THOC6,TIMM22
SERTAD2	0.00607	0.272	ACOX1,NRF1,PHYH
AF-2364	0.00607	0.272	MAPK1,PAK2,PIK3CA
dexamethasone	0.00612	0.272	ABHD2,ACADM,ACOT7,ACOX1,ADRA2A,AP3S1,ATP1A1,BSCL2,CATSPER2,CAV2,CBLB,CCR1,CLU,COG2,COPA,CPD,CPSF3,CSF1R,CSF2RB,CTSD,CX3CR1,DDHD1,E2F4,EIF4G3,EPHA1,ETFA,ETS2,EVL,GBP5,GTF2I,HADHB,HELZ2,HLA-DMB,HLA-DOB,HLA-DRB5,HLTF,HSPA9,IDS,IRF5,ITGA5,JARID2,KLHL24,LGALS8,LYVE1,MAP2K1,MAPK1,MEF2C,MLXIP,MSR1,MTA3,MYB,NEU1,NFKB2,PELP1,PLAU,PLD1,PTGFRN,RPS23,SERPINF1,SFSWAP,SLC4A7,SMPDL3A,SPP1,ST3GAL5,STOM,TFAP4,THR…
BLOC1S6	0.00624	0.272	PI4K2A,STX12
TMPRSS4	0.00624	0.272	ITGA5,PLAU
miR-182-5p (and other miRNAs w/seed UUGGCAA)	0.00638	0.273	CARD11,DDX60,GADD45G,MALAT1,NLGN2,PIK3CA
GnRH analog	0.00642	0.273	ACOT7,BUB3,CLTA,DAXX,FKBP1A,FLT1,HADHB,HSP90AB1,MAPK1,N4BP1,NME6,POLR2E,PSEN2,PSMB4,RASSF2,THRA,UBE2V1
ESR1	0.00652	0.274	ABHD2,ACOX1,AGGF1,AK1,ARID4A,ARSG,BUB1B,BUB3,CAV2,CEP250,COG2,COPA,CTSD,FAM102A,FBXW7,FGFR1,FOXO4,GADD45G,GAS7,IRF5,JMY,KLHL24,MAP1B,MAP7,MAPK1,MRPL52,MTA3,MYB,MYO6,NFKB2,NRF1,NUP153,NUP35,OPHN1,OTUB2,PAK2,PDE7A,PDZK1,PLAU,PRKAB1,PRKCI,PSEN2,RAPGEF6,SFXN3,SON,SOX4,SPP1,SSR3,SUFU,TNIP1,TSPYL2,UHMK1,USP8
TLE3	0.00704	0.289	ECSIT,ETFA,NDUFA7,NDUFAB1,NDUFB4,NDUFC2,NDUFS6
colistin	0.00707	0.289	AGMO,AK1,EXTL3,JMY,PTPRM,SOX4,SPP1,SYNJ1
MEL T1	0.00733	0.295	GLOD4,HIBCH,PRDX1
SOX7	0.00739	0.295	FGFR1,FLT1,LRP5,PLAU,SOX4,VCAN
kanamycin A	0.00786	0.309	AGMO,AK1,EXTL3,JMY,PTPRM,SOX4,SPP1,SYNJ1
tretinoin	0.00792	0.309	ABHD2,ACOX1,B3GALT5,CACNA1C,CCR1,CSF1R,CTSD,CX3CR1,DDX10,DDX60,E2F4,ECE1,ELAVL3,EMP3,EPHA1,FARSB,FASTK,FGFR1,FLT1,GAS7,HLA-DMB,LRP5,MAG,MAP1B,MAP2K1,MAP7,MAPKAPK2,MEF2C,MTHFD2,MYB,MYO9A,NAE1,NFKB2,NR2C1,NRF1,ORC3,PIK3CG,PIN1,PLAU,PLD1,PSMC4,RBM14,RNF10,RPL10,RPL3,SDCBP,SMAD1,SMOX,SOX4,SPP1,THRA,TLR2,TLR5,TNIP1,TOP2B,TOR1B,TPT1,TSPAN33,Ubb,UBE3A,WDR3,YBX1
geldanamycin	0.00808	0.311	AKR1B1,ANXA7,CLU,FGFR1,FYN,HEXB,HLTF,HSP90AB1,IRF5,NAE1,NUDC,NUP58,PELP1,SDCBP,TNRC6B
2-bromoethylamine	0.00822	0.313	CLU,EMP3,FCGR2A,SPP1,TUBB
CpG ODN 2006	0.00835	0.314	ARPC4,DOCK10,GBP5,HSP90AB1,NFAM1,NFKB2,PSMB2,PSMC4,PSMD2,PSMD8,TLR5,TNFSF13B,TNIP1,ZC3H12A
IL10	0.00866	0.314	ANKS1A,ARAP2,BUB1B,CCR1,CSF1R,CSF2RB,CTSD,CTSZ,CX3CR1,ETS2,FCGR2A,HEXB,HLA-DRB5,MSR1,NUP153,PDZK1,PIK3CG,SPP1,TLR2,TLR5,TNFSF13B,VCAN
STK3	0.00873	0.314	SOX4,SPP1,WWTR1
USP1	0.00873	0.314	FYN,ITGA5,USP1
Go6983	0.00873	0.314	ACADM,FLT1,PRDX1
metribolone	0.00885	0.315	ABCC4,ABHD2,ARL6IP1,CAV2,CLU,ETFA,FZD5,GADD45G,GOT2,HIBCH,MAP7,NDUFA7,NDUFAB1,NDUFC2,PDHX,PFKL,PHYH,PNKD,TBC1D4,TMEM50A,TOMM22,VCAN
nilotinib	0.00894	0.315	ABCC4,ANAPC4,BUB3,DBF4,PIK3CA
6-hydroxydopamine	0.00917	0.317	ASCC1,GADD45G,HSP90AB1,HSPA9,MAPK1,PSMB2,PSMC4,PYCARD
antrodia camphorata polysaccharide	0.0092	0.317	ASCC1,PYCARD
fluoromethyl 2,2-difluoro-1-(trifluoromethyl)vinyl ether	0.00972	0.328	ANXA7,CDO1,CLU,SPP1
SLC22A5	0.00972	0.328	ACADM,HADHB,PLAU,SMAD1
NFE2L2	0.00992	0.331	ABCC4,ANG,ATP1A1,CCT3,CCT7,CTSD,EIF3G,GADD45G,GNA11,HMBS,HSP90AB1,HSPA9,L1CAM,LGALS8,MEF2C,PRDX1,PSMB2,PSMB4,PSMD12,PSMD7,Slc35a2,UBQLN2,UGT1A6,USO1
mir-322	0.0103	0.34	FGFR1,LYPLA2,MAP2K1
HYAL1	0.0105	0.34	C1orf54,MAP1B,NLRP1,SPP1,TUBB
UBQLN2	0.0105	0.34	PSMB2,PSMB4,PSMD12,PSMD2,PSMD8
BMP10	0.0106	0.34	CCR1,CX3CR1,FCGR2A,MEF2C,MSR1,SKIL,VCAN
dithiothreitol	0.0108	0.343	SEL1L,SYVN1,TLR2,UBE3A
Akt	0.0111	0.346	AIMP2,CPD,CTSD,E2F4,FHIT,GCNT2,L1CAM,LMBRD1,MGAT5,MYB,NRF1,NRP2,PTPRM,SLC4A7,SOX4,SPP1,TLR2,TMEM9B,VCAN
diphtheria toxin	0.0112	0.346	AGMO,CTSD,DONSON,DUSP6,MRPL20,OPHN1,PLAU,RPL3,TLR2
desmopressin	0.0112	0.346	AKR1B1,Anp32a,ATP1A1,CTSD,RBM14,SPTBN2,TUBB
ouabain	0.0114	0.348	ATP1A1,EIF2AK4,FLT1,HSPA9,MAPK1
L-methionine	0.0118	0.358	CCNB2,CLU,ETS2,GNA11,PIN1,SPP1
ERBB2	0.0123	0.367	AIMP2,ANG,BUB1B,CCNB2,CHD7,CLU,CPD,CSF1R,CX3CR1,DDX10,DUSP6,ELF2,EMP3,FHIT,FLT1,GCNT2,GOLPH3,HADHB,ITGA5,L1CAM,LIG3,MAP1B,MGAT5,MLXIP,NDUFAB1,NFIB,NFKB2,NRBP1,PCDHGA12,PHYH,PIN1,PLAU,POLR2E,PSMD8,RXFP4,SLC4A7,SOX4,TMEM9B,UGT1A6,VCAN
E2F2	0.0126	0.367	CCNB2,ECE1,JMY,MYB,PIN1,TOP2B
CDC25A	0.0127	0.367	MPHOSPH6,NAT10
PSENEN	0.0127	0.367	PSEN2,PSENEN
juglone	0.0127	0.367	E2F4,PIN1
RXRA	0.0137	0.378	ACADM,ACOX1,CAMK1D,CDO1,CLU,CNNM1,DDX60,EEF2,GADD45G,HADHB,MAP1B,NDUFC2,NUPR1,PLD1,SPP1,THAP1,URB1,VCAN,ZC3H12A
SYVN1	0.0138	0.378	ABCC4,ATP1A1,GGCX,L1CAM,NFKB2,RPL10,SETX,SLC4A7,STOM
ASPSCR1-TFE3	0.0138	0.378	ABHD2,CTSD,RAB32,SFXN3,STOM,THEM6,UAP1L1
metronidazole	0.0141	0.378	AGMO,AK1,EXTL3,JMY,PTPRM,SOX4,SPP1,SYNJ1
NGLY1	0.0145	0.378	ATG14,GABPB1,NRF1,WIPI2
Irgm1	0.0145	0.378	APOBEC3B,CCNB2,DDX60,GBP5,GSDMD,NUPR1,TLR2
SETBP1	0.015	0.378	BUB1B,CARD11,FBXW7,GNA11,MYB,WWTR1
UCHL1	0.015	0.378	CPD,DOCK10,GABPB1,JMY,PHF20,PIK3CG
carboplatin	0.0153	0.378	CLU,FCGR2A,PNKD,SPP1,TUBB
GRN	0.0154	0.378	CLU,CTSD,CTSZ,CX3CR1,HEXB,MEF2C,PICALM,SPP1
SMARCA4	0.0155	0.378	ABHD2,ASCC1,C1orf54,CCR1,CLK1,DUSP6,EMP3,EPHA1,EPHA4,ETS2,FCGR2A,GADD45G,HEXB,ITGA5,KDM6B,MAP1B,MAPK1,MEF2C,MYB,NFKB2,NRP2,OXCT1,PFKL,SPP1,TLR2,TNFSF13,TUBB
PAX3-FOXO1	0.0155	0.378	ADRA2A,AKR1B1,ATP1A1,CEP170B,CHD7,EEF2,FOXO4,ITGA5,JARID2,NFIB,NONO,SMPDL3A,SPP1,ST3GAL5
miR-293-5p (and other miRNAs w/seed CUCAAAC)	0.0158	0.378	GOLPH3,MAPK1,SSR3
NUP98-NSD1	0.0158	0.378	MSR1,MYB,SOX4
GPR174	0.0161	0.378	ARAP2,CARD11,CBLB,ETS2,FYN,KDM6B,SPATA13
Tcf7	0.0164	0.378	CX3CR1,FGFR1,FYN,GCNT2,KCNJ3,MAPKAPK2,MGAT5,NHSL2,NUPR1,PI4K2A,PIK3R6,PLXNB2,PPT2,Prg4,TBC1D4,ZNF467
methyl methanesulfonate	0.0164	0.378	CTSD,GADD45G,NUPR1,PLXNB2,SYVN1
ETV3	0.0166	0.378	MYB,SPP1
NUP155	0.0166	0.378	CACNA1C,Pln
EGR2	0.0173	0.378	CBLB,CPD,CSF1R,EPHA4,MAG,MAP7,MYB,NFKB2,NRP2,PDE7A,PPT2,SMAD1,Tgoln1,TOP2B
HDL-cholesterol	0.0173	0.378	ALDH1L2,APOB,KLHL24,NUPR1
butyric acid	0.0177	0.378	ARID4A,CCNB2,CCR1,CLU,E2F4,EMP3,FYN,HADHB,ITGA5,MYB,MYH14,NEU1,NFKB2,PFKL,PLAU,PRDX1,PTPRM,RNF141,SPP1,THRA,TLR2
RBL2	0.0177	0.378	BUB1B,CASP4,CCNB2,E2F4,FGFR1,PSMB2,RANBP1
TNF	0.0181	0.378	ACADM,ACOX1,AKR1B1,APOBEC3B,ATP1A1,BUB1B,CASP4,CCDC15,Ccl27a,CCR1,CDO1,CLU,CSF1R,CSF2RB,CTSD,CTSZ,CX3CR1,DAXX,DUSP6,E2F4,ETS2,EXOSC7,FGFR1,FLT1,FOXO4,FYN,FZD5,GADD45G,GSDMD,GTDC1,HEXB,HLA-DRB5,Hmgn2 (includes others),HSP90AB1,IRF5,ITGA5,JARID2,KCNQ1OT1,LGALS8,LYVE1,MAPK1,MEF2C,MSR1,NCK1,NFKB2,PAFAH2,PAK2,PDZD2,PELP1,PIK3CG,PLAU,PLXNB2,PYCARD,RAB32,RAPGEF5,SERPINF1,SMAD1,SMPDL3A,SOX4,SPP1,ST3GAL5,…
ERG	0.0182	0.378	ABCC4,CAMK1D,CTNNA1,DOCK10,FLT1,FYN,NPHP1,PLAU,PRKCI,RAPGEF5,SOX4,SPP1
ETS1	0.0182	0.378	CSF1R,DNAJA3,ETS2,FCGR2A,FLT1,HS2ST1,MGAT5,MSR1,MYB,PLAU,SPP1,SYVN1
mir-182	0.0188	0.378	CARD11,CSF1R,GADD45G,MALAT1,NLGN2,PIK3CA
LONP1	0.0188	0.378	ALDH1L2,EARS2,ECSIT,HSPA9,MTHFD2,OXCT1
MMP3	0.0195	0.378	CAPRIN1,PPIL1,RBM14,SF3A3,SNRNP48,THOC6,YBX1
TNFSF11	0.0198	0.378	CCR1,CSF1R,DUSP6,FAM102A,ITGA5,MAP2K1,NFKB2,NME6,PLD1,SEL1L,SPP1,TLR2,TNIP1,ZNF260
IFN alpha/beta	0.0199	0.378	DAXX,GAS7,TLR2,TLR5,TNFSF13,TNFSF13B
levodopa	0.02	0.378	AGGF1,ASTN1,B3GALT5,CTSZ,DUSP6,ECE1,ETS2,FAM3A,GAS7,HEXB,LGALS8,MEF2C,MRPS21,OTULIN,PDZD2,PIK3CG,PRICKLE1,SFXN3,SLC24A2,ST3GAL5,TET3,Tgoln1,TNFAIP1,TTC17,UAP1L1,WWTR1,YLPM1
CLEC4A	0.02	0.378	ABCA9,LYVE1,MSR1,TLR2,VCAN
PGF	0.0205	0.378	ETS2,FLT1,NANOS1,NRP2
LARP1	0.021	0.378	EEF2,RPL10,RPL3,RPL37A,RPS23,TPT1
APH1A	0.021	0.378	PSEN2,PSENEN
SNHG7	0.021	0.378	FAIM2,GALNT1
CNBP	0.021	0.378	AK1,DUSP3
PTGES3	0.021	0.378	CTSD,NUPR1
MNX1	0.021	0.378	CBLB,NONO
PPP1CA	0.021	0.378	SPP1,WWTR1
D-thioctic acid	0.021	0.378	GABPB1,NRF1
sivelestat	0.021	0.378	TNFSF13,TNFSF13B
tunicamycin	0.0219	0.378	ACOX1,Arf2,CASP4,EDEM2,HSPA9,SEC11A,SEL1L,Slc35a2,SSR3,SYS1,SYVN1,TLR2,UFM1,USO1
CIITA	0.0222	0.378	GCNT2,HLA-DMB,HLA-DOB,HLA-DRB5
IL2	0.0223	0.378	CASP4,CBLB,CCR1,CPD,CSF1R,CSF2RB,CX3CR1,DUSP6,DUSP7,E2F4,EPHA4,EVL,FGFR1,FYN,GADD45G,GPSM1,HLA-DRB5,L1CAM,MAP2K1,MAPKAPK2,MTHFD2,MYB,Pcmt1,PPP6C,Prg4,PSMG1,RPL10,SPP1,TLR2,WDR3
TEAD1	0.0226	0.378	ACADM,Cox6c,ETFA,HADHB,NDUFA7,NDUFAB1,NDUFB4,NDUFC2,NDUFS6
RET	0.0234	0.378	CLU,DUSP6,EIF4G3,HSPA9,L3MBTL2,MAPKAPK2,PLAU,Pln,UBQLN2
CCL20	0.024	0.378	CX3CR1,GBP5,PIK3CG,ZC3H12A
RBM20	0.0243	0.378	CSDE1,EEF2,FASTK,IMPACT,RPL3,SOX4,TNRC6B
PRDM5	0.0244	0.378	APOBEC3B,CACNA1C,ETS2,EVL,MYB,SNRNP48
ZC3H12A	0.0245	0.378	ABCC4,Anp32a,ARAP2,GBP5,IRF5,NFKB2,PDE7A,PIK3CG,RAPGEF6,TNIP1
ST1926	0.0251	0.378	AKR1B1,CCT3,EEF2,EIF3G,PIN1,RPL10,SOX4,TPT1,YBX1
FLCN	0.0252	0.378	CTSZ,HEXB,L1CAM,NDUFB4,SDCBP,SLC17A5,UAP1L1,ZC3H12A
NPC1	0.0252	0.378	APOB,CAV2,CCR1,CSF1R,CTSD,CTSZ,CX3CR1,HLA-DRB5,PI4K2A,PRDX1
PRL	0.0253	0.378	CLU,CPD,CTSD,GPSM1,HELZ2,HNRNPH2,LYVE1,N4BP1,NUPR1,PAQR8,PCOLCE,PDE7A,SPP1,TNFSF13B,ZCCHC2
clofibrate	0.0254	0.378	ABCC4,ACOX1,ANXA7,HADHB,Hmgn2 (includes others),MYB,NR2C1
TP73	0.0255	0.378	AGGF1,ARVCF,ATG4C,CASP4,CASS4,CTSD,DCAF6,FLT1,GPR137B,INPP4A,IRF5,ITGA5,KLHL24,NUPR1,PLAU,RNF144B,SERPINF1,SPP1,UBE2V1,VAMP4,YBX1
CD247	0.0256	0.378	ANG,ETFA,FCGR2A,MTHFD2,SRP14
lomustine	0.0256	0.378	CLU,EMP3,FCGR2A,SPP1,TUBB
STF-1019	0.0256	0.378	PI4K2A
miR-373 inhibitor	0.0256	0.378	PIK3CA
PIK3R6	0.0256	0.378	PIK3CG
FB23-2	0.0256	0.378	APOBEC3B
capsular polysaccharide	0.0256	0.378	MSR1
ORG 34517	0.0256	0.378	NR3C2
coactivator-Dtx-Notch-Rbpsuh	0.0256	0.378	MAG
1H,1H,2H,2H-perfluorodecanol	0.0256	0.378	ACOX1
SNHG17	0.0256	0.378	SOX4
CWH43	0.0256	0.378	L1CAM
OVGP1	0.0256	0.378	MAPKAPK2
REEP5	0.0256	0.378	TOP2B
KIF21A	0.0256	0.378	MAP1B
DNAJC24	0.0256	0.378	EEF2
HDLBP	0.0256	0.378	CSF1R
B3GALT1	0.0256	0.378	B3GALT5
SAMD4B	0.0256	0.378	NANOS1
HOOK3	0.0256	0.378	MSR1
ASTN2	0.0256	0.378	ASTN1
CPB1	0.0256	0.378	CASP4
DPH2	0.0256	0.378	EEF2
IL34	0.0256	0.378	CSF1R
roxadustat	0.0256	0.378	SERPINF1
afuresertib	0.0256	0.378	CBLB
CACNB2	0.0256	0.378	CACNA1C
mir-3202	0.0256	0.378	FAIM2
miR-125a-3p (miRNAs w/seed CAGGUGA)	0.0256	0.378	FYN
miR-105-5p (and other miRNAs w/seed CAAAUGC)	0.0256	0.378	TLR2
miR-1225-3p (miRNAs w/seed GAGCCCC)	0.0256	0.378	GAB3
mir-1225	0.0256	0.378	GAB3
PIK3R5	0.0256	0.378	PIK3CG
KCNJ9	0.0256	0.378	KCNJ3
BARX1	0.0256	0.378	L1CAM
phenanthroline-(2H,7H)-diacetate	0.0256	0.378	PIN1
cyclo(D-Arg-D-Arg-DThr(P)-Pip-Nal-Arg-Gln)	0.0256	0.378	PIN1
clomoxir	0.0256	0.378	ACADM
BC-DXI01	0.0256	0.378	AIMP2
dexamethasone/tobramycin	0.0256	0.378	TLR2
dihydroxyphenylethylene glycol	0.0256	0.378	MAP1B
CIC-DUX4	0.0256	0.378	DUSP6
miR-216b inhibitor	0.0256	0.378	GALNT1
CA-074	0.0256	0.378	CTSZ
oxfenicine	0.0256	0.378	ACADM
D-mannoheptulose	0.0256	0.378	APOB
CAY10585	0.0258	0.378	FLT1,NR3C2
MCL1	0.0258	0.378	TPT1,UAP1L1
MLH1	0.0258	0.378	CLU,PMS2
STX3	0.0258	0.378	SART3,VCAN
butylhydroxybutylnitrosamine	0.0258	0.378	FHIT,UGT1A6
poloxamer	0.0258	0.378	ACADM,ACOX1
CSF1R	0.0259	0.378	CSF1R,GAB3,MSR1,MYB
miR-155-5p (miRNAs w/seed UAAUGCU)	0.0278	0.404	BRPF3,CSF1R,JARID2,MOSPD2,MYB,PICALM,PRKCI,SDCBP,SMAD1
torin1	0.0286	0.409	EEF2,NDUFA7,NDUFAB1,NDUFC2,PFKL,RPL10,RPL3,RPL37A,RPS23,TPT1
LEF1	0.0287	0.409	CARD11,CX3CR1,FGFR1,GCNT2,KCNJ3,MGAT5,NHSL2,PIK3R6,PLXNB2,Prg4,SPP1,TBC1D4,TLR2,ZNF467
CYLD-AS1	0.0287	0.409	AKR1B1,IRF2BPL,MYB,NFKB2,PRDX1
mitomycin C	0.0287	0.409	APOBEC3B,CCNB2,IRF2BPL,MALAT1,PYCARD
PRKAG3	0.0287	0.409	ACTR1B,CCNDBP1,CTNNA1,FGFR1,GADD45G,LUC7L2,OXCT1,PDE7A,REV3L
triamterene	0.0303	0.428	CLU,EMP3,FCGR2A,SPP1,TUBB
tamoxifen	0.0303	0.428	ACOX1,ANG,CAV2,CLU,CTSD,E2F4,EPHA4,GPATCH3,HSP90AB1,KLHL24,PDZK1,PSMB4,PSMD2,SPP1,USP1,XPO5
OGA	0.0305	0.428	ACADM,ARPC4,CAMK1D,CCR1,CDKAL1,CSF1R,CSF2RB,CX3CR1,DAGLB,EPHA4,FGFR1,GADD45G,GALK2,HSP90AB1,NDUFC2,PLAU,THRA,WWTR1
uridine	0.031	0.428	ACOX1,HADHB
(2-(2-(4-methylthiazol-5-yl)ethoxy)-2-oxoethyl)triphenylphosphonium bromide	0.031	0.428	NRF1,RBM14
MYD88	0.031	0.428	APOBEC3B,CASP4,DAXX,EDEM2,ELF2,ETS2,FANCF,HSP90AB1,KDM6B,MSR1,NFKB2,SPP1,TLR2,TNFSF13B,ZC3H12A
mir-144	0.0311	0.428	ETS2,PPP6C,VCAN
nilvadipine	0.0311	0.428	LGALS8,SDCBP,TEP1
ESRRA	0.0315	0.431	ACADM,ACOX1,B4GALT6,CX3CR1,FAM102A,FZD5,NRP2,PIK3R6,Pln,PTPRM,SPP1,THRA,TIMM22,ZC3H12A
fenamic acid	0.032	0.436	CLU,EMP3,FCGR2A,SPP1,TUBB
ZFTA-RELA	0.0321	0.436	CASP4,L1CAM,NFKB2,TNIP1
MAP4K4	0.0325	0.438	CBLB,CHPT1,HADHB,ITGA5,NDUFAB1,PDHX,PHYH
Esrra	0.0325	0.438	ACADM,ACOX1,ATP1A1,OXCT1,PFKL,SPP1,THRA
lenalidomide	0.0334	0.448	APTX,CAV2,CTTNBP2,DFFA,FZD5,LRP5,MYB,NEK6,NFIB,PTPRM,SEL1L,TNFSF13B
NRIP1	0.0338	0.449	ACADM,CCNB2,HADHB,NR2C1,OTUB2
PTP4A1	0.0338	0.449	EEF2,FKBP1A,HNRNPH2,NCK1,PIK3CA,PRDX1,VCAN
RASSF1	0.034	0.449	CASP4,CAV2,CLU,MAP1B,SPP1,TUBB
IND S7	0.0342	0.449	ETFA,GLOD4,TUBB
ammonium	0.0342	0.449	ACSF2,ARHGAP33,ATP1A1,BRPF3,CLU,CTSD,FAM98B,PSMB4,UPF1,USO1
CPT1B	0.0343	0.449	ACADM,CBLB,Cox6c,MAP2K1,MAPK1,NDUFA7,NDUFAB1,NDUFS6,PIK3CA,PIK3CG,PRKAB1,PRKCI
AR	0.0354	0.46	ABCC4,ATP8A1,B4GALT6,BUB1B,CACNA1C,CAV2,CCT3,CDO1,CHPT1,ESYT3,ETS2,FAM3A,GADD45G,KCNJ3,MEF2C,MTHFD2,MYB,NUPR1,OXCT1,P2RX1,PFKL,PLAU,Pln,SMOX,SPP1,VCAN,WWTR1,XPOT
ATP5IF1	0.0356	0.46	ACADM,ETFA,HADHB,HIBCH,OXCT1
(-)-epicatechin gallate	0.0366	0.46	SPP1,WWTR1
quizartinib	0.0366	0.46	GADD45G,SPP1
BRMS1	0.0366	0.46	PLAU,SPP1
KPT-9274	0.0366	0.46	FANCF,PAK4
azetidyl-2-carboxylic acid	0.0366	0.46	CLU,HSPA9
4-aminophenol	0.0366	0.46	CLU,SPP1
DLL4	0.0366	0.46	FLT1,ITGA5,LYVE1,NFKB2
guanidinopropionic acid	0.0366	0.46	ATP8A1,NDUFA7,NDUFB4,NRF1
IRF7	0.0371	0.46	CASP4,DAXX,GBP5,HELZ2,IRF5,NT5C3A,TNFSF13B,TOR1B,USP8
BRD4	0.0371	0.46	ABCC4,ANKRA2,CCR1,ITGA5,JARID2,MYB,PLAU,SPP1,TUBB
DNMT3A	0.0372	0.46	CACNA1C,CASP4,CSF1R,IRF5,KDM6B,PIK3CG,PRKCI,SKIL,SPP1,TLR5
xanthine derivative CB002 analog 4	0.0374	0.46	APOB,PNKD,RANBP10
MST1	0.0374	0.46	MSR1,SOX4,SPP1
MEL S3	0.0374	0.46	ETFA,GLOD4,TUBB
TCF7L2	0.0375	0.46	ARAP2,CPD,CTNNA1,DOCK10,FKBP1A,KCNJ3,MAG,MAP7,MOSPD2,MYB,MYO6,PAPSS1,PICALM,PLAU,PRICKLE1,SNX30,SPP1,VCAN
SORL1	0.0383	0.466	EPHA1,EPHA4,FLT1,FZD5,HSP90AB1,ITGA5,LYVE1,NRP2,PLAU
Notch	0.0386	0.466	CSF2RB,FCGR2A,NFAM1,NHSL2,PIK3R6,PLAU,SMAD1,SVIP
TNFSF13B	0.0386	0.466	CCR1,FIGNL1,GCNT2,HLA-DMB,NFKB2,P2RX1,PTPRM,SPP1
NFKB2	0.0386	0.466	AKR1B1,FZD5,GBP5,HLA-DMB,MYB,NFKB2,RAB3B,UGT1A6
TRAP1	0.0388	0.466	ALDH1L2,EARS2,ECSIT,L1CAM,MTHFD2,NDUFB4
MYBL2	0.039	0.466	CCNB2,CLTA,CLU,COPA
SOX10	0.039	0.466	GAS7,L1CAM,MAG,SUFU
gentamicin C	0.0394	0.466	CLU,EMP3,FCGR2A,SPP1,TUBB
SENP1	0.0408	0.466	CTSD,GABPB1,NRF1
KCNJ2	0.0408	0.466	APBA1,CEP250,FYCO1,GAS7,MAP1B,MYH14,SPTBN2
APOE	0.0412	0.466	ACADM,ACOX1,APOB,CLU,CSF2RB,CTSD,GAS7,HSP90AB1,ITGA5,MSR1,PLAU,PSMC4,SMAD1,SPP1,TLR2,TNIP1,VCAN
RNASEH2A	0.0415	0.466	IRF5,NFKB2,PSMD6,TLR2
thioacetamide	0.0417	0.466	ABCC4,Anp32a,B4GALT6,CLU,CSNK1D,EMP3,FCGR2A,LYVE1,PCOLCE,PTGFRN,SPP1,UGT1A6
KRAS	0.042	0.466	ABCC4,AIMP2,CLU,CSF2RB,DUSP6,E2F4,EIF3G,FCGR2A,FGFR1,GALNT1,GTF2I,HADHB,HLA-DMB,L1CAM,LIG3,MAP2K1,MGAT5,MSR1,NFKB2,NUDC,PARG,PCOLCE,PFKL,PIK3CA,PLD1,PRKCI,PTPRM,PYCARD,RANBP1,SPP1,STOM,TLR2,VCAN,WWTR1
CREB3L2	0.0425	0.466	SEC24C,USO1
HES5	0.0425	0.466	FBXW7,MYB
CX3CR1	0.0431	0.466	BBS7,CEP250,DPCD,DUSP7,FYCO1,MAP1B,MAP7,MSR1,ZXDB
STIM1	0.0435	0.466	CAMK1D,FLT1,ITGA5,PRDX1,RPS23
NFATC2	0.0439	0.466	CASP4,CX3CR1,DAXX,HELZ2,JARID2,KDM6B,PDZD2,PLD1,TLR2,TNFSF13B
VCP	0.0444	0.466	NFKB2,SEL1L,TNFSF13B
KDM3B	0.0456	0.466	ADRA2A,ARL6IP1,FKBP1A,HJURP,TSPAN7
HOXA9	0.0457	0.466	ETS2,FZD5,MYB,NRF1,RPL37A,SDCBP,SOX4,SPP1,USP1
Ppar	0.048	0.466	ACADM,ACOX1,HADHB
NOSTRIN	0.048	0.466	FLT1,ITGA5,PLAU
FOXF1	0.048	0.466	CACNA1C,FLT1,ITGA5
dicarbethoxydihydrocollidine	0.048	0.466	ABCC4,CCNB2,SPP1
PML	0.0483	0.466	ACADM,ACOX1,DDX60,DNAJC9,HADHB,HLA-DMB,MAP2K1,MAPK1,PRDX1
GON4L	0.0487	0.466	CCNB2,MYB
mGluR	0.0487	0.466	MAP1B,OPHN1
miR-378a-3p (and other miRNAs w/seed CUGGACU)	0.0487	0.466	MAPKAPK2,SUFU
SPINT2	0.0487	0.466	ELF2,PLAU
THZ1	0.0488	0.466	CLU,NUPR1,PCOLCE,PDZD2,Prg4,SERPINF1,VCAN
beta-estradiol	0.0491	0.466	ACADM,ACOX1,ANAPC4,Anp32a,APBA1,ARHGAP35,ARID4A,ARPC4,ARSG,BAZ1A,BUB1B,BUB3,CASP4,CAV2,CCNB2,CCR1,CLU,CSF1R,CSF2RB,CTNNA1,CTSD,DCAF6,DUSP3,DUSP6,EIF3G,EPHA1,ETS2,FARSB,FCGR2A,FGFR1,FYN,FZD5,GADD45G,GALNT1,GNA11,GPR137B,GTF2I,HLA-DRB5,HSP90AB1,HSPA9,IRF5,L1CAM,LRP5,MAP2K1,MAPK1,MEF2C,MGAT5,MMADHC,MOSPD2,MRPL52,MYB,NFKB2,NR2C1,NR3C2,NRF1,NRP2,NUPR1,OTUB2,OXCT1,PBXIP1,PDZK1,PEAR1,PFKL,PLAU,PRICKLE1,…
CpG oligonucleotide	0.0497	0.466	CASP4,CCNB2,CCR1,DDX60,ETS2,MSR1,TLR2,TNFSF13,TNFSF13B
ZBTB10	0.053	0.479	9930111J21Rik1/Gm12185,CASP4,FLT1,GBP5,Gm5431,LY9,NT5C3A,SERINC5
SP2509	0.059	0.501	ABCC4,BUB1B,FGFR1,HSPA9,L1CAM,NEK6,NFIB,PAK2,SETDB1,SMAD1,SPP1,VCAN,WDR77
SLC15A4	0.0594	0.501	CBLB,CCNB2,DOCK10,GBP5,MSR1,MTHFD2,TUBB
IRF6	0.0712	0.507	APOBEC3B,PELP1,PLAU,TFAP4
3,5-dihydroxyphenylglycine	0.0802	0.528	KCNQ1OT1,L1CAM,RPL10,RPL3,RPL37A,RPS23,TPT1
ETV6-RUNX1	0.117	0.562	CARD11,EMP3,FGFR1,GPSM3,IRF5,MAP2K1,NCK1,NEK6,P2RX1,PLXNB2,SPP1,TNFSF13
SERPINE1	0.118	0.562	DUSP6,FLT1,NFKB2,PLAU,TLR2
tazemetostat	0.123	0.567	ABCC4,FGFR1,HSPA9,L1CAM,NEK6,NFIB,PAK2,SETDB1,SMAD1,SPP1,VCAN,WDR77
mir-34	0.129	0.579	CPD,CSF1R,MYB,SCLT1,SLC4A7
CLPP	0.131	0.579	ACADM,ETFA,HADHB,HSPA9
ID3	0.141	0.579	CCR1,CSF2RB,ETS2,G6PC3,GADD45G,IRF5,MYB,SOX4
MYCN	0.157	0.605	ABCC4,ABCF3,CLU,DUSP7,EEF2,HSP90AB1,JARID2,RPL10,RPL3,RPL37A,RPS23,TUBB
bortezomib	0.161	0.605	CSF2RB,E2F4,FANCF,MAPK1,NRF1,PSMB4,PSMC4,PSMD12,PSMD2,PSMD6
FBXW7	0.174	0.605	CARD11,MCAT,MTHFD2,NFKB2
indomethacin	0.199	0.615	ACOX1,CLU,CSF2RB,CTSD,EMP3,FCGR2A,FLT1,SPP1,TUBB,VCAN
QKI	0.211	0.62	CLTA,CSF1R,FYN,MAP1B
MAPK14	0.222	0.627	DUSP6,FLT1,MEF2C,PIN1,PLAU,PRDX1,SPP1,TLR2
HRAS	0.223	0.627	ACADM,ADRA2A,ARHGAP26,CLU,CTSZ,DUSP6,EIF4G3,GADD45G,GIMAP1,HADHB,ITGA5,MAPK1,OXCT1,Pcmt1,PIN1,PLAU,PTGFRN,SOX4,SPP1,SSR3,THRA,VCAN
ID2	0.229	0.627	CCR1,CSF2RB,ETS2,G6PC3,GADD45G,IRF5,MYB,SOX4
aldosterone	0.247	0.634	ATP1A1,DAXX,FKBP1A,FLT1,NR3C2,SPP1,TBC1D4
valproic acid	0.249	0.634	AKR1B1,CCR1,CHPT1,IDS,PSMB2,PSMB4,PSMC4,PSMD12,PSMD2,PSMD6,PSMD7,PSMD8,SEL1L,SPP1,ST3GAL5,TMEM164
FOXM1	0.271	0.653	BUB1B,CCNB2,FLT1,ITGA5,NFKB2,VCAN
dihydrotestosterone	0.275	0.653	ABCC4,BUB1B,CCT3,CDO1,CLU,FGFR1,GTF2I,MYB,PLAU,POLDIP3,RAB3B,RPL3,RPL37A,RPS23,SEL1L,SLC4A7,SPP1,SVIP,VCAN,VPS54
estrogen	0.349	0.691	APOB,CCNB2,CLU,CTSD,FLT1,ITGA5,MTA3,MYB,SPP1
memantine	0.376	0.704	CACNA1C,EPHA4,HSP90AB1,SYNJ1
DUSP1	0.386	0.709	DDX60,DUSP6,HELZ2,NT5C3A,TLR2
PTGER4	0.402	0.711	DAXX,RASSF2,RNF144B,SPP1,TBC1D4
KAT5	0.402	0.711	ALDH1L2,MRPL20,OTUB2,PSMC4,PSMD12,PSMD6
PDX1	0.402	0.711	AKR1B1,CDO1,DUSP6,FGFR1,MALAT1,SPP1
NFKB1	0.415	0.719	AKR1B1,CASP4,DROSHA,HLA-DMB,MSR1,MYB,NFKB2,PLAU,TLR2
lithium chloride	0.479	0.749	IDS,MYB,PLD1,VCAN
Growth hormone	0.51	0.762	AKR1B1,CLU,FZD5,HADHB,SPP1,TBC1D4,Ubb
INSR	0.515	0.764	ACADM,Anp32a,ATP1A1,ETFA,GOT2,HADHB,ITGA5,MRPS21,NDUFB4,NFKB2,NRF1,THRA,TIMM22,TLR2,YBX1
ANGPT2	0.54	0.772	CCT7,KDM6B,MAP2K1,NR3C2,PLAU,RBM14
GNAS	0.549	0.773	ATP1A1,ETS2,FYN,GADD45G,SPP1
MLXIPL	0.554	0.774	RPL10,RPL3,RPL37A,RPS23
IgG	1	1	ACOX1,AFM,ETS2,FCGR2A,FLT1,LY9,SERPINF1,TNIP1
FSH	1	1	ARHGAP35,ARPC4,CASP4,DUSP3,FGFR1,ITGA5,MAP2K1,PI4K2A,RASSF2,SMAD1
MRTFA	1	1	ARPC4,CACNA1C,ITGA5,NFIB,P2RX1
FOXA2	1	1	APOB,ASTN1,MAP1B,NFKB2,PDHX,UST
SIRT1	1	1	ACADM,CCNB2,DDX60,FGFR1,HELZ2,HJURP,HLA-DRB5,MEF2C,NLGN2,NRF1,PRKCI,SDCBP
CALCA	1	1	CSF2RB,FLT1,IRF5,RBM14

## Sheet: Master regulator
Supplementary Data 3e: 16p11dup with THC master regulator compared to WT-Veh
Master Regulator	Molecule Type	Participating regulators	Depth	two-tailed p-value of overlap	B-H corrected p-value	Network bias-corrected p-value	Target gene name in analysed list	Causal network	Target-connected regulators
NOP53	other	26s Proteasome,ABL1,AKT1,APOB,AR,BHLHE40,BRCA1,CCND1,CEBPA,CREB1,DDX5,E2F1,EGFR,EIF2AK3,EIF4E,ERBB2,estrogen receptor,FAS,GLI1,HNF4A,HRAS,IGF1R,IGFBP3,IKK (complex),IL6,JUN,KAT2B,KAT5,MAPK1,MAPK8,MDM2,mir-145,mir-23,MYC,MYCN,NANOG,NFKBIA,NOP53,NOTCH1,NPM1,PGR,PI3K (family),PPARG,PPIF,PRKAA1,PTEN,PTPN6,RUNX3,SMAD3,SP1,STAT1,STAT5a/b,STAT6,STING1,TP53,TP63,USP7	3	2.6e-13	8.53e-10	0.0001	ABCA9,ABCC4,ABCF3,ACADM,ACOT7,ACOX1,ACSF2,AK1,AKR1B1,ALDH1L2,ANAPC4,ANG,APOB,APOBEC3B,Arf2,ARHGAP33,ARHGAP35,ARL6IP1,ARVCF,ASTN1,ATG4C,ATP1A1,ATP8A1,B3GALT5,B4GALT6,BIVM,BSCL2,BUB1B,BUB3,CAND1,CAPRIN1,CARD11,CASP4,CAV2,CDO1,CEP250,CHD1,CHD7,CHPT1,CLK1,CLU,CNNM1,COG2,CSF1R,CSNK1D,CTNNA1,CTSD,DBF4,DDX60,DFFA,DNAJA3,DOCK10,DUSP3,DUSP6,DUSP7,ECSIT,EIF3G,EIF4G3,ELF2,EPHA1,EPHA4,ESYT3,ETFA,ETS2,EXOSC7,…	212 (57)	56
Ep300/Pcaf	complex	26s Proteasome,ABL1,Akt,AKT1,AR,BHLHE40,CASP8,CCND1,CDKN1A,CDKN2A,CEBPA,CRTC2,CTNNB1,DDX5,DNMT3A,E2F1,EIF2AK3,EIF4E,EP300,Ep300/Pcaf,ERBB2,ERK1/2,ESR1,estrogen receptor,FAS,FOXA2,FOXO3,GATA4,GLI1,HCFC1,IGF1R,IGFBP3,IL6,IRF4,IRF7,KAT2B,KLF13,MAPK9,MEF2C,mir-145,MTOR,MYC,MYOD1,NANOG,NFE2L2,NFKBIA,NOTCH1,NPM1,p70 S6k,PDX1,PGR,PI3K (complex),PPIF,PRKAA1,RB1,SMAD3,SP1,SP3,STING1,T3-TR-RXR,TP53,TP73,TS…	3	3.33e-13	8.53e-10	0.0001	ABCF3,ACADM,ACOT7,ACSF2,AIMP2,AK1,AKR1B1,ANAPC4,APBA1,APOBEC3B,Arf2,ARL6IP1,ARSG,ARVCF,ASRGL1,ATG14,ATG4C,ATP1A1,ATP8A1,B3GALT5,B4GALT6,BSCL2,BUB1B,BUB3,CACNA1C,CAMK1D,CAND1,CAPRIN1,CARD11,CASP4,CASS4,CAV2,Ccl27a,CCNB2,CCT7,CDO1,CEP250,CHD7,CHPT1,CLTA,CLU,CNNM1,COPA,CSF1R,CSNK1D,CTSD,DBF4,DCAF6,DDX60,DFFA,DNAJA3,DONSON,DUSP6,DUSP7,E2F4,ECSIT,EDEM2,EEF2,EIF4G3,ELF2,EPHA1,ESYT3,ETFA,ETS2,EXOSC7,FAI…	219 (66)	64
SGI 1776	chemical drug	Akt,AKT1,AR,ATF4,BAD,BRCA1,CASP8,CCND1,CDK4/6,CDKN1A,CDKN2A,CREB1,CSF2,CTNNB1,EIF2AK3,EIF4E,EIF4EBP1,F2,FOS,FOXO3,FOXP3,GLI1,GSK3B,HSF1,MAPK9,MDM2,mir-22,MYC,NFATC2,NFE2L2,NFKBIA,NPM1,PIM1,PIM2,PIM3,PTEN,RAF1,RB1,RUNX1,RUNX3,SGI 1776,SP1,STAT6,Tgf beta,TP53,TP73,TSC2	3	3.51e-13	8.53e-10	0.0001	ABCA9,ABCC4,ABCF3,ABHD2,ACADM,ACOT7,ACSF2,AGGF1,AIMP2,AK1,AKR1B1,ANAPC4,APOB,APOBEC3B,Arf2,ARHGAP33,ARHGAP35,ARID4A,ARL6IP1,ASRGL1,ATP8A1,B3GALT5,B4GALT6,BSCL2,BUB1B,CAMK1D,CAND1,CASS4,CAV2,Ccl27a,CCNB2,CCT3,CDO1,CHPT1,CLK1,CLU,CPD,CSDE1,CSF1R,CSF2RB,CSNK1D,CTNNA1,CTSD,CTSZ,DBF4,DCAF6,DDX60,DNAJA3,DONSON,DROSHA,DUSP3,DUSP6,DUSP7,E2F4,ECSIT,EEF2,EIF3G,EIF4G3,EMP3,ESYT3,ETFA,ETS2,EXOSC7,EXTL3,FAM3A…	199 (47)	42
ARVib-7	chemical reagent	AHR,AR,ARVib-7,ATXN3,CFTR,EIF4E,ERBB2,ESR1,EZH2,FOXO1,FOXP3,HIF1A,HTT,IRF3,IRF7,MAPT,MYC,MYOCD,NFKB2,NOS2,NPM1-ALK,NR3C1,PRKCZ,PTEN,RIGI,RIPK3,RUNX1,RUNX1-RUNX1T1,SMAD3,SRC,STAT1,STK4,STUB1,TBK1,TGM2,TP53	3	5.49e-13	8.53e-10	0.0001	ABCA9,ABCC4,ABCF3,ACOX1,ACSF2,AGGF1,AIMP2,AKR1B1,ANAPC4,ARL6IP1,ARSG,ARVCF,ATG14,ATG4C,ATP1A1,ATP8A1,B4GALT6,BSCL2,BUB1B,BUB3,CACNA1C,CAND1,CCR1,CCT3,CDO1,CEP250,CHD1,CHD7,CHPT1,COG2,COPA,CPD,CSDE1,CSF2RB,CSNK1D,CTNNA1,CTSZ,DBF4,DNAJA3,DROSHA,DUSP7,ECE1,ECSIT,EEF2,EIF3G,EIF4G3,ELF2,EMP3,ESYT3,ETFA,ETS2,EXOSC7,FAM3A,FARSB,FASTK,FBXW7,FKBP1A,FOXO4,FZD5,GADD45G,GAS7,GCNT2,GOT2,GTF2I,HELZ2,HEXB,HLA-D…	184 (36)	36
STUB1	enzyme	AHR,AR,ATXN3,CFTR,EIF4E,ERBB2,ESR1,EZH2,FOXO1,FOXP3,HIF1A,HTT,IRF3,IRF7,MAPT,MYC,MYOCD,NFKB2,NOS2,NPM1-ALK,NR3C1,PRKCZ,PTEN,RIGI,RIPK3,RUNX1,RUNX1-RUNX1T1,SMAD3,SRC,STAT1,STK4,STUB1,TBK1,TGM2,TP53	2	1e-12	8.53e-10	0.0001	ABCA9,ABCC4,ABCF3,ACOX1,ACSF2,AGGF1,AIMP2,AKR1B1,ANAPC4,ARL6IP1,ARSG,ARVCF,ATG14,ATG4C,ATP1A1,ATP8A1,B4GALT6,BSCL2,BUB3,CACNA1C,CAND1,CCR1,CCT3,CDO1,CEP250,CHD1,CHD7,CHPT1,COG2,COPA,CPD,CSDE1,CSF2RB,CSNK1D,CTNNA1,CTSZ,DBF4,DNAJA3,DROSHA,DUSP7,ECE1,ECSIT,EEF2,EIF3G,EIF4G3,ELF2,EMP3,ESYT3,ETFA,ETS2,EXOSC7,FAM3A,FARSB,FASTK,FBXW7,FKBP1A,FOXO4,FZD5,GADD45G,GAS7,GCNT2,GOT2,GTF2I,HELZ2,HEXB,HLA-DMB,HLA…	182 (35)	35
TT-00420	chemical drug	AKT1,AURKA,AURKB,BRCA1,ERK1/2,FADD,FOXO3,MYC,NFKBIA,NPM1,PAX8,PKM,PPP1CA,RACGAP1,RALA,RASSF1,SDCBP,SRC (family),TP53,TT-00420	3	1.01e-12	8.53e-10	0.0001	ABCC4,ABCF3,ACOX1,ACSF2,AIMP2,AK1,AKR1B1,ANAPC4,ANG,ARVCF,ATG4C,ATP1A1,B3GALT5,CACNA1C,CAMK1D,CAND1,CARD11,CAV2,CCR1,CCT3,CPD,CSDE1,CSF1R,CSNK1D,CTNNA1,CTSZ,DBF4,DDX60,DNAJA3,DROSHA,DUSP3,DUSP7,ECE1,EEF2,EIF3G,EIF4G3,ETFA,EXOSC7,FBXW7,FGFR1,FKBP1A,FLT1,FOXO4,FYN,GADD45G,GAS7,GOT2,GTF2I,Hmgn2 (includes others),HSP90AB1,HSPA9,IMPACT,INPP4A,KCNQ1OT1,KMT2D,L1CAM,LIG3,MAG,MAP1B,MCAT,MEF2C,MPHOSPH6,MSR…	128 (20)	17
XMD16-144	chemical drug	AKT1,AURKA,AURKB,BRCA1,ERK1/2,FADD,FOXO3,MYC,NFKBIA,NPM1,PAX8,PKM,PPP1CA,RACGAP1,RALA,RASSF1,SDCBP,SRC (family),TP53,XMD16-144	3	1.01e-12	8.53e-10	0.0001	ABCC4,ABCF3,ACOX1,ACSF2,AIMP2,AK1,AKR1B1,ANAPC4,ANG,ARVCF,ATG4C,ATP1A1,B3GALT5,CACNA1C,CAMK1D,CAND1,CARD11,CAV2,CCR1,CCT3,CPD,CSDE1,CSF1R,CSNK1D,CTNNA1,CTSZ,DBF4,DDX60,DNAJA3,DROSHA,DUSP3,DUSP7,ECE1,EEF2,EIF3G,EIF4G3,ETFA,EXOSC7,FBXW7,FGFR1,FKBP1A,FLT1,FOXO4,FYN,GADD45G,GAS7,GOT2,GTF2I,Hmgn2 (includes others),HSP90AB1,HSPA9,IMPACT,INPP4A,KCNQ1OT1,KMT2D,L1CAM,LIG3,MAG,MAP1B,MCAT,MEF2C,MPHOSPH6,MSR…	128 (20)	17
SNS 314	chemical drug	AKT1,AURKA,AURKB,BRCA1,ERK1/2,FADD,FOXO3,MYC,NFKBIA,NPM1,PAX8,PKM,PPP1CA,RACGAP1,RALA,RASSF1,SDCBP,SNS 314,SRC (family),TP53	3	1.01e-12	8.53e-10	0.0001	ABCC4,ABCF3,ACOX1,ACSF2,AIMP2,AK1,AKR1B1,ANAPC4,ANG,ARVCF,ATG4C,ATP1A1,B3GALT5,CACNA1C,CAMK1D,CAND1,CARD11,CAV2,CCR1,CCT3,CPD,CSDE1,CSF1R,CSNK1D,CTNNA1,CTSZ,DBF4,DDX60,DNAJA3,DROSHA,DUSP3,DUSP7,ECE1,EEF2,EIF3G,EIF4G3,ETFA,EXOSC7,FBXW7,FGFR1,FKBP1A,FLT1,FOXO4,FYN,GADD45G,GAS7,GOT2,GTF2I,Hmgn2 (includes others),HSP90AB1,HSPA9,IMPACT,INPP4A,KCNQ1OT1,KMT2D,L1CAM,LIG3,MAG,MAP1B,MCAT,MEF2C,MPHOSPH6,MSR…	128 (20)	17
AMG 900	chemical drug	AKT1,AMG 900,AURKA,AURKB,BRCA1,ERK1/2,FADD,FOXO3,MYC,NFKBIA,NPM1,PAX8,PKM,PPP1CA,RACGAP1,RALA,RASSF1,SDCBP,SRC (family),TP53	3	1.06e-12	8.53e-10	0.0001	ABCC4,ABCF3,ACOX1,ACSF2,AIMP2,AK1,AKR1B1,ANAPC4,ANG,ARVCF,ATG4C,ATP1A1,B3GALT5,CACNA1C,CAMK1D,CAND1,CARD11,CAV2,CCR1,CCT3,CPD,CSDE1,CSF1R,CSNK1D,CTNNA1,CTSZ,DBF4,DDX60,DNAJA3,DROSHA,DUSP3,DUSP7,ECE1,EEF2,EIF3G,EIF4G3,ETFA,EXOSC7,FBXW7,FGFR1,FKBP1A,FLT1,FOXO4,FYN,GADD45G,GAS7,GOT2,GTF2I,Hmgn2 (includes others),HSP90AB1,HSPA9,IMPACT,INPP4A,KCNQ1OT1,KMT2D,L1CAM,LIG3,MAG,MAP1B,MCAT,MEF2C,MPHOSPH6,MSR…	128 (20)	17
TTP607	chemical drug	AKT1,AURKA,AURKB,BRCA1,ERK1/2,FADD,FOXO3,MYC,NFKBIA,NPM1,PAX8,PKM,PPP1CA,RACGAP1,RALA,RASSF1,SDCBP,SRC (family),TP53,TTP607	3	1.06e-12	8.53e-10	0.0001	ABCC4,ABCF3,ACOX1,ACSF2,AIMP2,AK1,AKR1B1,ANAPC4,ANG,ARVCF,ATG4C,ATP1A1,B3GALT5,CACNA1C,CAMK1D,CAND1,CARD11,CAV2,CCR1,CCT3,CPD,CSDE1,CSF1R,CSNK1D,CTNNA1,CTSZ,DBF4,DDX60,DNAJA3,DROSHA,DUSP3,DUSP7,ECE1,EEF2,EIF3G,EIF4G3,ETFA,EXOSC7,FBXW7,FGFR1,FKBP1A,FLT1,FOXO4,FYN,GADD45G,GAS7,GOT2,GTF2I,Hmgn2 (includes others),HSP90AB1,HSPA9,IMPACT,INPP4A,KCNQ1OT1,KMT2D,L1CAM,LIG3,MAG,MAP1B,MCAT,MEF2C,MPHOSPH6,MSR…	128 (20)	17
rocuronium	chemical drug	Akt,AKT1,CHRM2,CHRNA3,CHRNA4,CHRNA7,CHRNB2,EGFR,ERK1/2,MAPK1,MAPK14,MAPK8,MAPT,MMP14,MYC,nicotine,P38 MAPK,RAS,RGS4,rocuronium,TP53,TP53RK	3	1.79e-12	1.31e-09	0.0001	ABCC4,ABCF3,ACADM,ACOT7,ACSF2,AK1,AKR1B1,ANAPC4,ANXA7,ARVCF,ATG4C,ATP1A1,BUB1B,CAND1,CARD11,CAV2,CCNB2,CCT3,CLK1,CPD,CSDE1,CSNK1D,CTNNA1,CTSD,DBF4,DDX60,DNAJA3,DOCK10,DROSHA,DUSP7,E2F4,ECE1,ECSIT,EEF2,EIF3G,EIF4G3,ETFA,EXOSC7,FBXW7,FGFR1,FHIT,FKBP1A,FLT1,FOXO4,FYN,GADD45G,GAS7,GCNT2,HADHB,HJURP,HSP90AB1,HSPA9,IMPACT,INPP4A,IRF5,ITGA5,KCNQ1OT1,KMT2D,LIG3,LMBRD1,MAG,MAP1B,MAPK1,MCAT,MEF2C,MGAT5,MPH…	135 (22)	16
MAPKAPK5	kinase	ABL1,AKT1,AR,BHLHE40,CCND1,CDKN2A,CEBPA,Cpla2,Creb,CREB1,CTNNB1,DNAJB1,E2F1,EIF2AK3,EIF4E,ERBB2,FAS,FMR1,Focal adhesion kinase,FOXO3,GATA1,GLI1,GSK3B,HNF4A,HSF1,Hsp27,HSPB1,IGFBP3,IKBKB,IKK (complex),IL6,JUN,KAT2B,MAPK1,MAPK9,MAPKAPK5,mir-145,MYC,NFKBIA,NOTCH1,NPM1,p70 S6k,PGR,PLA2G10,PPIF,PRKAA1,PRKCD,RB1,RET,RICTOR,RPS6KB1,SMAD3,SP1,SRC,STAT3,STING1,TFRC,TP53,TP73,TSC2,Ubiquitin	3	2.02e-12	1.36e-09	0.0002	ABCA9,ABCF3,ACADM,ACOT7,ACSF2,AGGF1,AK1,AKR1B1,ANAPC4,ANG,APOBEC3B,Arf2,ARHGAP33,ARHGAP35,ARL6IP1,ARVCF,ASRGL1,ASTN1,ATG14,ATG4C,ATP1A1,ATP6V1G2,ATP8A1,B3GALT5,B4GALT6,BSCL2,BUB1B,BUB3,CAMK1D,CAND1,CAPRIN1,CARD11,CASP4,CASS4,CAV2,CBLB,CCT7,CDO1,CHD1,CHD7,CHPT1,CLU,COG2,Cox6c,CSNK1D,CTSD,DBF4,DDX60,DFFA,DNAJA3,DOCK10,DONSON,DUSP6,DUSP7,E2F4,ECSIT,EEF2,EIF3G,EIF4G3,ELF2,EPHA1,ESYT3,ETFA,EXOSC7,FAIM…	211 (61)	56
TFDP1	transcription regulator	26s Proteasome,AKT1,AR,BHLHE40,CASP8,CCND1,CCNE1,CCR2,CDKN2A,CEBPA,CEBPB,Creb,CREB1,DDX5,DUSP1,E2F1,E2F2,E2F3,EGFR,EIF2AK3,EIF4E,ERBB2,ERK1/2,ESR1,ETS1,FAS,FOS,FOXO3,GATA1,GLI1,GSK3B,HIF1A,HNF4A,IGF1R,IKK (complex),IL10,IL6,IRF1,JUN,KAT2B,MAPK8,MAPK9,MED1,mir-145,MITF,MTOR,MYC,MYOD1,MYRF,NANOG,NFE2L2,NFKBIA,NOTCH1,NPM1,NR1I3,p70 S6k,PPIF,PRKAA1,PTGS2,PTPRR,RAF1,RB1,RPTOR,RRAS2,SIRT1,SP3,STAT3,STK…	3	3.38e-12	1.97e-09	0.0001	ABCF3,ACADM,ACSF2,AGGF1,AK1,AKR1B1,ANAPC4,ANG,ANKS1A,APBA1,APOBEC3B,ARAP2,Arf2,ARHGAP33,ARL6IP1,ARSG,ARVCF,ASTN1,ATG14,ATG4C,ATP1A1,ATP8A1,B3GALT5,B3GAT2,B4GALT6,BUB1B,BUB3,CACNA1C,CAND1,CAPRIN1,CARD11,CASP4,CASS4,Ccl27a,CCNB2,CCT3,CCT7,CEP250,CHD1,CHD7,CHPT1,CLK1,CLU,COG2,COPA,CSDE1,CSF1R,CSNK1D,CTSD,DBF4,DCAF6,DFFA,DNAJA3,DONSON,DUSP6,DUSP7,E2F4,ECSIT,EEF2,EIF3G,EIF4G3,ELF2,ESYT3,ETFA,EXOSC7,FA…	229 (73)	72
SOX2	transcription regulator	26s Proteasome,ABL1,Akt,AKT1,BHLHE40,CCND1,CDKN1A,CDKN2A,CEBPA,CEBPB,CTNNB1,DDX5,DNMT3A,E2F1,EGR2,EIF2AK3,EIF4E,ERBB2,ERK1/2,FAS,FOXO3,GLI1,HIF1A,HNF4A,IGF1R,IGFBP3,IL6,IRF3,JUN,KAT2B,MAPK9,mir-145,MTOR,MYC,NANOG,NFkB (complex),NFKBIA,NOTCH1,NPM1,p70 S6k,PGR,PI3K (complex),PPARG,PPIF,PRKAA1,SMAD3,SOX2,SP1,TERT,TP53,TP73,TSC2	3	3.42e-12	1.97e-09	0.0002	ABCF3,ACADM,ACOT7,ACSF2,ADRA2A,AGGF1,AIMP2,AK1,AKR1B1,ANAPC4,ANG,Arf2,ARHGAP35,ARL6IP1,ARVCF,ASRGL1,ASTN1,ATG14,ATG4C,ATP1A1,B3GALT5,BSCL2,BUB1B,BUB3,CACNA1C,CAMK1D,CAND1,CAPRIN1,CARD11,CASP4,CASS4,CAV2,CBLB,CCNB2,CCT3,CDO1,CHD7,CLU,COG2,CPD,CSF1R,CSNK1D,CTSD,DBF4,DCAF6,DFFA,DNAJA3,DOCK10,DONSON,DUSP6,DUSP7,E2F4,ECE1,ECSIT,EEF2,EIF3G,EIF4G3,ELF2,EPHA1,EPHA4,ETFA,ETS2,EXOSC7,FAIM2,FASTK,FBXW7,FCGR…	221 (52)	51
harmine	chemical - endogenous non-mammalian	2-amino-1-methyl-6-phenylimidazo-4-5-b-pyridine,26s Proteasome,ABL1,AHR,Akt,AKT1,Alp,aristolochic acid I,benzo(a)pyrene,BHLHE40,CASP8,CBL,CCND1,CDKN1A,CDKN2A,CEBPA,Creb,CTNNB1,CYP1A1,DDX5,E2F1,EGFR,EIF2AK3,EIF4E,ERBB2,ERK1/2,ESR1,FAS,FOXO3,GLI1,harmine,HIF1A,HNF4A,IGF1R,IL6,JUN,KAT2B,MAPK9,mir-145,mir-23,MITF,MTOR,MYC,NANOG,NFkB (complex),NFKBIA,NOTCH1,NPM1,p70 S6k,PGR,PI3K (complex),PPARG,PPIF,P…	3	4.93e-12	2.64e-09	0.0001	ABCF3,ACADM,ACOX1,ACSF2,ADRA2A,AIMP2,AK1,AKR1B1,ANAPC4,ANG,APOBEC3B,Arf2,ARHGAP35,ARL6IP1,ARSG,ARVCF,ASRGL1,ASTN1,ATG14,ATG4C,ATP1A1,B3GALT5,BSCL2,BUB1B,BUB3,CAMK1D,CAND1,CAPRIN1,CARD11,CASP4,CASS4,CAV2,Ccl27a,CCNB2,CCT3,CCT7,CDO1,CEP250,CHD7,CLK1,CLU,COPA,CSF1R,CSF2RB,CSNK1D,CX3CR1,DBF4,DCAF6,DDX60,DFFA,DNAJA3,DONSON,DUSP6,DUSP7,E2F4,ECE1,ECSIT,EEF2,EIF3G,EIF4G3,ELF2,EPHA1,EPHA4,ETFA,EXOSC7,FAIM…	227 (64)	62
CYBB	enzyme	Akt,AKT1,CHUK,CYBB,EGFR,ERK,ERK1/2,ERN1,IKBKB,IRF3,JINK1/2,JUN,MAPK1,MAPK3,MMP9,NFKBIA,RELA,SYK,TP53,XBP1	2	5.51e-12	2.77e-09	0.0001	ACADM,ACOT7,ACSF2,AIMP2,AK1,AKR1B1,ANAPC4,ANG,APOB,APOBEC3B,ARVCF,ATG4C,ATP1A1,ATP8A1,B3GALT5,BUB1B,CACNA1C,CAND1,CARD11,CAV2,CBLB,Ccl27a,CLK1,CPD,CSF1R,CSNK1D,CTNNA1,DAXX,DBF4,DDX60,DNAJA3,DOCK10,DROSHA,E2F4,ECE1,EDEM2,EIF4G3,ETFA,FBXW7,FHIT,FKBP1A,FLT1,FOXO4,GADD45G,GALK2,GALNT1,GAS7,GBP5,GCNT2,GGCX,GOLPH3,GOT2,HADHB,HELZ2,Hmgn2 (includes others),HSP90AB1,INPP4A,IRF5,JMY,KMT2D,L1CAM,LMBRD1,LY9,…	129 (20)	19
triflusal	chemical drug	ATF1,BTRC,CDX1,Creb,EGFR,ERK1/2,FOS,FOXO1,FOXO3,GSK3B,IKBKB,IKK (complex),MAP2K4,MAPK1,MAPK3,MAPK8,MAPT,MTOR,MYC,NFkB (complex),NFKB1,NFKBIA,NOS2,p70 S6k,PDE10A,PTGS1,PTGS2,STAT3,STAT4,STAT5a/b,TLR3,TP53,triflusal,TYK2	3	6.2e-12	2.82e-09	0.0001	ABCC4,ABCF3,ACADM,ACOT7,ACSF2,ADRA2A,AIMP2,AK1,ANAPC4,ANG,APOB,ARVCF,ATG14,ATG4C,ATP1A1,B3GALT5,BUB1B,CACNA1C,CAND1,CARD11,CASP4,CAV2,CBLB,Ccl27a,CCT3,CHD1,CLK1,CPD,CSDE1,CSNK1D,DAXX,DBF4,DDX60,DNAJA3,DOCK10,DROSHA,DUSP7,E2F4,ECE1,ECSIT,EIF3G,EIF4G3,EPHA4,EXOSC7,FAM102A,FANCF,FBXW7,FKBP1A,FLT1,FOXO4,GAS7,GBP5,GCNT2,GOT2,GTF2I,HADHB,HEXB,HLA-DMB,HSPA9,IMPACT,INPP4A,ITGA5,KCNQ1OT1,KDM6B,KMT2D,LIG3,…	155 (34)	31
RPL23A	other	26s Proteasome,ABL1,Akt,AKT1,AR,BHLHE40,CDKN1A,CDKN2A,CEBPA,CEBPB,CTNNB1,DDX5,EIF2AK3,EIF4E,ERBB2,FAS,FOS,GLI1,HIF1A,HNF4A,IGF1R,IGFBP3,IL6,KAT2B,mir-145,mir-23,MTOR,MYC,MYOD1,NANOG,NFE2L2,NFKBIA,NOTCH1,NR4A1,p70 S6k,PGR,PPIF,PRKAA1,PTEN,RAF1,RB1,RPL23A,SMAD3,SP1,STAT3,STING1,TP53,TP73,TSC2	3	6.31e-12	2.82e-09	0.0001	ABCA9,ABCF3,ACADM,ACSF2,AGGF1,AIMP2,AK1,AKR1B1,ANAPC4,APOBEC3B,Arf2,ARHGAP35,ARL6IP1,ARVCF,ASRGL1,ASTN1,ATG4C,ATP8A1,B3GALT5,B4GALT6,BSCL2,BUB1B,CAND1,CAPRIN1,CARD11,CASP4,CASS4,CAV2,CCNB2,CCT7,CHD1,CHD7,CHPT1,CLK1,CLU,COG2,CSF1R,CSNK1D,CTSD,DBF4,DCAF6,DDX60,DFFA,DNAJA3,DONSON,DUSP6,DUSP7,E2F4,ECSIT,EEF2,EIF4G3,ELF2,EPHA1,ESYT3,ETFA,ETS2,EXOSC7,FAIM2,FAM102A,FAM3A,FASTK,FBXW7,FCGR2A,FKBP1A,FLT1,F…	206 (49)	48
CEBPA	transcription regulator	aflatoxin B1,APP,AR,Calcineurin protein(s),calcitriol,CASP1,Casp12,CASP8,CCND1,CD3,CDK2,CDK4,CDK4/6,CDKN1A,CEBPA,CEBPB,clopidogrel,Creb,CREB1,CREBBP,CTNNB1,CYP2B6,EGFR,ERBB2,ERBB3,ERK1/2,ESR2,FOXO1,FOXO3,GADD45A,GATA1,GLI1,glucocorticoid,HIF1A,HNF4A,HRAS,ID2,ID3,IGF1R,IL2,IL6,IL6ST,IRF1,IRF3,KAT2B,KLF13,MAPK1,MCL1,mir-21,MITF,MMP3,MTOR,MYC,NFE2L2,NOTCH1,NR1I2,NRAS,OTX2,PLCG2,PPARA,PPARG,PPARGC1A,…	3	7.71e-12	3.26e-09	0.0001	2810025M15Rik,ABCC4,ABCF3,ACOT7,ACOX1,AIMP2,AKR1B1,ALDH1L2,APBA1,APOB,ARHGAP33,ARHGAP35,ARID4A,ARL6IP1,ASCC1,ASRGL1,ASTN1,ATP8A1,AURKAIP1,B4GALT6,BUB1B,C1orf54,CAMK1D,CAPRIN1,CASP4,CAV2,CBLB,Ccl27a,CCNB2,CCR1,CCT3,CEP170B,CEP250,CHD7,CHPT1,CLU,COQ9,CPD,CSDE1,CSF1R,CTNNA1,CTSD,DAGLB,DAXX,DDX10,DDX60,DROSHA,DUSP6,DUSP7,ECSIT,EEF2,EIF3G,ELAVL3,ELF2,EMP3,ESYT3,EXOSC7,FAM102A,FAM3A,FASTK,FBXO11,FCGR2A…	230 (87)	81
mechlorethamine	chemical drug	26s Proteasome,ABL1,Akt,BHLHE40,CASP8,CCND1,CDKN1A,CDKN2A,CEBPA,CEBPB,Creb,CREB1,CTNNB1,DDX5,DUSP1,E2F1,EIF2AK3,EIF4E,ERBB2,ERK1/2,FAS,FGFR1,FOXO3,GLI1,GSK3B,HIF1A,HNF4A,IGFBP3,IKBKB,IL6,JINK1/2,KAT2B,KCND3,MAPK1,mechlorethamine,mir-145,mir-23,MITF,MTOR,MYC,NANOG,NFE2L2,NFkB (complex),NFKBIA,NOTCH1,NR4A1,p70 S6k,PGR,PI3K (complex),PPIF,PRKAA1,RB1,Rsk,RXRA,SMAD3,SP1,SRF,STAT1,STAT3,STAT4,TP53,TP73…	3	8.34e-12	3.35e-09	0.0002	ABCF3,ACADM,ACOT7,ACSF2,ADRA2A,AGGF1,AIMP2,AK1,AKR1B1,ANAPC4,APOBEC3B,Arf2,ARHGAP33,ARHGAP35,ARL6IP1,ARVCF,ASRGL1,ASTN1,ATG14,ATG4C,ATP1A1,B3GALT5,BSCL2,BUB1B,BUB3,CAND1,CAPRIN1,CARD11,CASP4,CASS4,CAV2,CBLB,Ccl27a,CCNB2,CCT7,CDO1,CHD1,CHD7,CLU,CNNM1,COG2,CSF1R,CSNK1D,CTSD,DBF4,DCAF6,DDX60,DFFA,DNAJA3,DOCK10,DONSON,DUSP6,DUSP7,E2F4,ECE1,ECSIT,EIF4G3,ELF2,EPHA1,ETFA,EXOSC7,FAIM2,FAM102A,FASTK,FBXW7…	217 (65)	62
CTDSP1	phosphatase	ATF4,BMI1,BRCA1,CASP8,CCND1,CDK4/6,CDKN1A,CDKN1B,CDKN2A,CREB1,CTDSP1,CTNNB1,F2,GLI1,GSK3B,KAT2B,MAPK14,MDM2,mir-22,MMP9,MYC,MYOD1,NFKBIA,NOTCH1,PTEN,RB1,RBL2,RELA,SP1,STAT3,Tgf beta,TP53,TP73,TWIST1	3	9.05e-12	3.47e-09	0.0002	ABCA9,ABCC4,ABCF3,ABHD2,ACADM,ACOX1,ACSF2,AGGF1,AIMP2,ANAPC4,ANG,APOB,APOBEC3B,ARHGAP33,ARHGAP35,ARID4A,ARL6IP1,ARVCF,ASRGL1,ATG4C,B3GALT5,BSCL2,BUB1B,CACNA1C,CAMK1D,CAND1,CARD11,CASS4,CAV2,Ccl27a,CCNB2,CCT3,CDO1,CPD,CSDE1,CSF1R,CSF2RB,CSNK1D,CTNNA1,CTSD,CTSZ,CX3CR1,DBF4,DCAF6,DDX60,DNAJA3,DOCK10,DONSON,DROSHA,DUSP3,DUSP6,DUSP7,ECE1,ECSIT,EEF2,EIF3G,EIF4G3,EMP3,ETFA,ETS2,EXOSC7,FAM102A,FBXW7,FCGR…	184 (34)	33
ZEB	group	Akt,AKT1,BBC3,CCND1,CHEK1,ERK1/2,MMP14,MYC,Nfat (family),Notch,PLCG2,RB1,SERPINE1,STAT3,TP53,USP7,ZEB,ZEB1,ZEB2	3	1.01e-11	3.58e-09	0.0001	ABCF3,ACADM,ACSF2,AIMP2,AK1,AKR1B1,ANAPC4,ANXA7,ARVCF,ATG4C,BUB1B,CACNA1C,CAND1,CARD11,CAV2,CCNB2,CCR1,CCT3,CSDE1,CSF2RB,CSNK1D,CTNNA1,CX3CR1,DAGLB,DAXX,DBF4,DDX60,DNAJA3,DOCK10,DROSHA,DUSP6,DUSP7,E2F4,ECE1,ECSIT,EEF2,EIF3G,EIF4G3,ETFA,EXOSC7,FAM102A,FBXW7,FCGR2A,FGFR1,FHIT,FKBP1A,FYN,GAS7,GBP5,GCNT2,GOT2,HADHB,HLA-DRB5,HLTF,HSP90AB1,HSPA9,IMPACT,INPP4A,IRF5,ITGA5,KCNQ1OT1,KMT2D,L1CAM,L3MBTL2,LIG…	139 (19)	18
Jmy-p300	complex	26s Proteasome,ABL1,Akt,AKT1,AR,BHLHE40,CASP8,CCND1,CDKN1A,CDKN2A,CEBPA,CRTC2,CTNNB1,DDX5,DNMT3A,E2F1,EIF2AK3,EIF4E,EP300,ERBB2,ERK1/2,ESR1,estrogen receptor,FAS,FOXA2,FOXO3,GATA4,GLI1,HCFC1,IGF1R,IGFBP3,IL6,Jmy-p300,KAT2B,KLF13,MAPK9,MEF2C,mir-145,MTOR,MYC,MYOD1,NANOG,NFE2L2,NFKBIA,NOTCH1,NPM1,p70 S6k,PDX1,PGR,PI3K (complex),PPIF,PRKAA1,RB1,SMAD3,SP1,SP3,STING1,T3-TR-RXR,TP53,TP73,TSC2,VitaminD3…	3	1.13e-11	3.58e-09	0.0001	ABCF3,ACADM,ACOT7,ACSF2,AIMP2,AK1,AKR1B1,ANAPC4,APBA1,APOBEC3B,Arf2,ARL6IP1,ARSG,ARVCF,ASRGL1,ATG14,ATG4C,ATP1A1,ATP8A1,B3GALT5,B4GALT6,BSCL2,BUB1B,BUB3,CACNA1C,CAMK1D,CAND1,CAPRIN1,CARD11,CASP4,CASS4,CAV2,Ccl27a,CCNB2,CCT7,CDO1,CEP250,CHD7,CHPT1,CLU,CNNM1,COPA,CSF1R,CSNK1D,CTSD,DBF4,DCAF6,DDX60,DFFA,DNAJA3,DONSON,DUSP6,DUSP7,E2F4,ECSIT,EDEM2,EEF2,EIF4G3,ELF2,EPHA1,ESYT3,ETFA,ETS2,EXOSC7,FAIM2,FA…	214 (64)	62
PLK1	kinase	26s Proteasome,Akt,CDC20,CTNNB1,DNMT3A,EIF4B,ESR1,FADD,FOXM1,HSF1,IRF3,MAVS,MDM2,MYC,NFkB (complex),NFKBIA,NPM1,PLK1,PTEN,PTK2,SNCA,STAT3,STK3,TP53,TP63	2	1.17e-11	3.58e-09	0.0001	ABCA9,ABCC4,ABCF3,ABHD2,ACOX1,ACSF2,ADRA2A,AGGF1,AIMP2,AKR1B1,ANAPC4,ANG,APOB,ARL6IP1,ARSG,ARVCF,ASRGL1,ATG4C,ATP1A1,B3GALT5,BUB3,CACNA1C,CAMK1D,CAND1,CARD11,CCT7,CEP250,CHD1,COG2,COPA,CSDE1,CSF1R,CSNK1D,CTNNA1,CTSZ,CX3CR1,DBF4,DNAJA3,DUSP7,E2F4,ECSIT,EEF2,EIF3G,EIF4G3,ETFA,ETS2,EXOSC7,FAM102A,FHIT,FKBP1A,FOXO4,FYN,GADD45G,GAS7,GBP5,GCNT2,GOT2,GPR137B,GTF2I,HELZ2,HEXB,HLA-DRB5,Hmgn2 (includes oth…	167 (25)	25
ACTL6A	other	ACTL6A,AR,ATF4,BRCA1,CASP8,CCND1,CDK4/6,CDKN1A,CDKN1B,CDKN2A,CREB1,CTNNB1,E2F1,ESR1,F2,GLI1,GSK3B,MAPK14,MDM2,mir-22,MMP9,MYC,NFKBIA,PTEN,RBL2,RELA,SMARCA4,SP1,STAT3,Tgf beta,TP53,TP73	3	1.2e-11	3.58e-09	0.0002	ABCA9,ABCC4,ABCF3,ABHD2,ACADM,ACSF2,AIMP2,AKR1B1,ANAPC4,ANG,APOB,APOBEC3B,ARHGAP33,ARHGAP35,ARID4A,ARL6IP1,ARSG,ASCC1,ASRGL1,ATG14,ATP8A1,B3GALT5,B4GALT6,BSCL2,BUB1B,BUB3,C1orf54,CACNA1C,CAMK1D,CAND1,CARD11,CASS4,Ccl27a,CCNB2,CCT3,CDO1,CEP250,CHPT1,CLU,COG2,COPA,CPD,CSDE1,CSF1R,CSNK1D,CTNNA1,CTSD,CTSZ,CX3CR1,DBF4,DCAF6,DDX60,DNAJA3,DOCK10,DONSON,DROSHA,DUSP3,DUSP7,ECE1,ECSIT,EEF2,EIF3G,EIF4G3,EPH…	202 (32)	32
DNMT3A	enzyme	26s Proteasome,Akt,Alp,BHLHE40,CASP8,CBL,CCND1,CDKN1A,CDKN2A,CEBPA,Creb,CREB1,DDX5,DNA-methyltransferase,DNMT3A,E2F1,EIF2AK3,EIF4E,ERBB2,ERK1/2,FAS,FOXO3,GLI1,GSK3B,HIF1A,HNF4A,IGFBP3,IKK (complex),IL6,JUN,KAT2B,MAPK8,MAPK9,mir-145,mir-23,MTOR,MYC,MYD88,NANOG,NFkB (complex),NFKBIA,NOTCH1,NPM1,p70 S6k,PGR,PI3K (complex),PPIF,PRKAA1,PRL,PTEN,PTK2,RB1,SMAD3,SP1,SRC,STAT1,STAT3,STAT5a/b,STING1,TP53,T…	3	1.22e-11	3.58e-09	0.0002	ABCA9,ABCF3,ACADM,ACOT7,ACSF2,ADRA2A,AGGF1,AIMP2,AK1,AKR1B1,ANAPC4,ANG,APOBEC3B,Arf2,ARHGAP33,ARL6IP1,ARVCF,ASTN1,ATG14,ATG4C,ATP1A1,B3GALT5,BSCL2,BUB1B,BUB3,CACNA1C,CAND1,CAPRIN1,CARD11,CASP4,CASS4,CAV2,Ccl27a,CCNB2,CCT3,CHD1,CHD7,CLU,COG2,CSF1R,CSNK1D,CTSD,DBF4,DCAF6,DDX60,DFFA,DNAJA3,DONSON,DUSP6,DUSP7,E2F4,ECE1,ECSIT,EEF2,EIF3G,EIF4G3,ELF2,EPHA1,EPHA4,ETFA,ETS2,EXOSC7,FAIM2,FAM102A,FANCF,FAST…	218 (62)	60
CHCHD4	enzyme	AHR,Akt,AKT1,APLN,ATF4,BHLHE40,CCND1,CDKN1A,CDKN2A,CEBPA,CHCHD4,Creb,CREB1,CTNNB1,DNMT3A,E2F1,EIF2A,EIF2AK3,EIF4E,ERBB2,ERK1/2,FAS,FMR1,FOXO3,FOXO4,FOXP3,GLI1,GSK3B,HIF1A,HNF4A,IGFBP3,IL1B,IL6,JUN,KAT2B,MAPK8,MAPK9,mir-145,mir-23,MYC,NANOG,NFkB (complex),NFKBIA,NOTCH1,NPM1,p70 S6k,PGR,PI3K (complex),PPIF,PRKAA1,PTEN,RACK1,RB1,RICTOR,RPS6KB1,SMAD3,SP1,STAT3,STING1,TNF,TP53,TP73,TSC2,VEGFA	3	1.22e-11	3.58e-09	0.0001	ABCA9,ABCF3,ACADM,ACOT7,ACSF2,ADRA2A,AGGF1,AIMP2,AK1,AKR1B1,ANAPC4,ANG,APOBEC3B,Arf2,ARHGAP33,ARHGAP35,ARL6IP1,ARVCF,ASRGL1,ASTN1,ATG14,ATG4C,ATP1A1,ATP6V1G2,B3GALT5,BSCL2,BUB1B,BUB3,CACNA1C,CAMK1D,CAND1,CAPRIN1,CARD11,CASP4,CASS4,CAV2,CCDC15,CCNB2,CCT3,CDO1,CHD1,CHD7,CLU,COG2,Cox6c,CSF1R,CSNK1D,CTSD,DBF4,DDX60,DFFA,DNAJA3,DONSON,DUSP6,DUSP7,E2F4,ECE1,ECSIT,EEF2,EIF3G,EIF4G3,ELF2,EPHA1,ETFA,ETS2,…	228 (64)	62
mustard gas	chemical toxicant	26s Proteasome,ABL1,Akt,AKT1,BHLHE40,CASP3,CASP8,CCND1,CDKN1A,CDKN2A,CEBPA,CEBPB,Creb,CREB1,CTNNB1,DDX5,DICER1,E2F1,EIF2AK3,EIF4E,ERBB2,ERK1/2,FAS,FGFR1,FOXO3,GLI1,GSK3B,HIF1A,HNF4A,IGFBP3,IKBKB,IL6,JUN,KAT2B,KCND3,MAPK8,MAPK9,mir-145,mir-23,MITF,MTOR,mustard gas,MYC,NANOG,NFkB (complex),NFKBIA,NOTCH1,NPM1,NR4A1,p70 S6k,PGR,PI3K (complex),PPARG,PPIF,PRKAA1,PRKCD,PTEN,RB1,Rsk,SMAD3,SP1,SRF,STAT3,S…	3	1.27e-11	3.58e-09	0.0002	ABCA9,ABCF3,ACADM,ACOT7,ACSF2,ADRA2A,AGGF1,AIMP2,AK1,AKR1B1,ANAPC4,ANG,APOBEC3B,Arf2,ARHGAP33,ARHGAP35,ARL6IP1,ARVCF,ASRGL1,ASTN1,ATG14,ATG4C,ATP1A1,B3GALT5,BSCL2,BUB1B,BUB3,CAMK1D,CAND1,CAPRIN1,CARD11,CASP4,CASS4,CAV2,Ccl27a,CCNB2,CCT3,CDO1,CHD1,CLU,COG2,CSF1R,CSNK1D,CTSD,DBF4,DCAF6,DDX60,DFFA,DNAJA3,DONSON,DUSP6,DUSP7,E2F4,ECE1,ECSIT,EEF2,EIF3G,EIF4G3,ELF2,EPHA1,ETFA,EXOSC7,FAIM2,FAM102A,FASTK,…	221 (67)	65
ACP-319	chemical drug	ACP-319,Akt,AKT1,Creb,ELAVL1,ERK1/2,FOXO1,FOXO3,Gsk3,GSK3B,HMGA1,IRF3,MYC,NFKBIA,Notch,p70 S6k,PI3K (complex),PI3K (family),PIK3C3,PIK3CA,PIK3CD,PIK3CG,PLCG2,PPARGC1A,PRKCD,PTEN,RAS,RELA,SLC12A2,SP1,SREBF1,SREBF2,STAT1,STAT3,SYK,TP53	3	1.29e-11	3.58e-09	0.0001	9930111J21Rik1/Gm12185,ABCA9,ABCF3,ABHD2,ACADM,ACOX1,ACSF2,AIMP2,AKR1B1,ANAPC4,ANG,APOBEC3B,ARL2BP,ARVCF,ATG14,ATG4C,ATP8A1,B3GALT5,BUB1B,CAMK1D,CAND1,CARD11,CCT3,CHD1,CSDE1,CSF2RB,CSNK1D,CTSD,CTSZ,CX3CR1,DAGLB,DBF4,DDX60,DNAJA3,DUSP7,E2F4,ECE1,ECSIT,EEF2,EIF3G,EIF4G3,ETFA,EXOSC7,FAM102A,FBXW7,FCGR2A,FGFR1,FHIT,FKBP1A,FOXO4,GAS7,GCNT2,GOT2,HADHB,HELZ2,HEXB,HJURP,HLA-DRB5,HSP90AB1,HSPA9,IMPACT,INP…	158 (36)	34
PFDN5	transcription regulator	Akt,ATF4,BRCA1,CASP8,CCND1,CDK4/6,CDKN1A,CDKN1B,CDKN2A,CREB1,CTNNB1,E2f,F2,GLI1,HIF1A,JUN,MAP2K1/2,mir-22,MYC,MYOD1,NFkB (complex),NFKBIA,PFDN5,PTEN,RBL2,SP1,Tgf beta,TP53,TP73	3	1.53e-11	4.1e-09	0.0002	ABCA9,ABCC4,ABCF3,ABHD2,ACADM,ACSF2,ADRA2A,AGGF1,AIMP2,AK1,AKR1B1,ANAPC4,ANG,APOBEC3B,ARHGAP33,ARHGAP35,ARID4A,ARL6IP1,ARVCF,ASRGL1,ATG4C,B3GALT5,BSCL2,BUB1B,CACNA1C,CAMK1D,CAND1,CARD11,CASP4,CASS4,Ccl27a,CCNB2,CCT3,CDO1,CLU,CPD,CSDE1,CSF1R,CSNK1D,CTNNA1,CTSD,CTSZ,CX3CR1,DAXX,DBF4,DCAF6,DDX60,DNAJA3,DOCK10,DONSON,DROSHA,DUSP3,DUSP6,DUSP7,ECSIT,EEF2,EIF3G,EIF4G3,ETFA,ETS2,EXOSC7,FGFR1,FHIT,FKBP1A,…	180 (29)	28
TRIM29	transcription regulator	26s Proteasome,ABL1,Akt,AKT1,BHLHE40,BRCA1,CASP8,CCND1,CDKN1A,CDKN2A,CEBPA,CTNNB1,DDX5,DNMT3A,E2F1,EIF2AK3,EIF4E,ERBB2,ERK1/2,FAS,FOXO3,GLI1,H2AX,HIF1A,HNF4A,IGF1R,IGFBP3,IKBKB,IKK (complex),IL6,KAT2B,LEF1,MAPK1,MAPK9,mir-145,mir-23,MTOR,MYC,NANOG,NFKBIA,NOTCH1,NPM1,p70 S6k,PGR,PI3K (complex),PPARG,PPIF,PRKAA1,RB1,SMAD3,SP1,STAT3,STING1,TAB2,TP53,TP53BP1,TP73,TRIM29,TSC2	3	1.59e-11	4.11e-09	0.0001	ABCF3,ACADM,ACOT7,ACSF2,AGGF1,AIMP2,AK1,AKR1B1,ANAPC4,ANG,APOBEC3B,Arf2,ARHGAP35,ARL6IP1,ARVCF,ASRGL1,ASTN1,ATG14,ATG4C,ATP1A1,B3GALT5,BSCL2,BUB1B,BUB3,CACNA1C,CAMK1D,CAND1,CAPRIN1,CARD11,CASP4,CASS4,CAV2,CBLB,Ccl27a,CCNB2,CCT3,CHD7,COG2,CSF1R,CSNK1D,CTSD,DBF4,DCAF6,DDX60,DFFA,DNAJA3,DOCK10,DONSON,DUSP3,DUSP6,DUSP7,E2F4,ECE1,ECSIT,EEF2,EIF3G,EIF4G3,ELF2,EPHA1,ETFA,EXOSC7,FAIM2,FAM102A,FANCF,FASTK…	208 (59)	55
CUL7	enzyme	26s Proteasome,ABL1,AKT1,BHLHE40,BIRC5,CCND1,CDKN1A,CDKN2A,CEBPA,CREB1,CTNNB1,CUL7,DDX5,E2F1,EIF2AK3,EIF4E,ERBB2,FAS,FOXO1,FOXP3,GLI1,Gsk3,HIF1A,HMGA1,HNF4A,IGFBP3,IKBKB,IL6,Insulin,IRS1,KAT2B,MAPK8,MAPK9,mir-145,mir-23,MST1,MTOR,MYC,NANOG,NFKBIA,NOS2,NOTCH1,NPM1,p70 S6k,PGR,PIK3CG,PPARG,PPIF,PRKAA1,PTPN11,RB1,SIRT1,SMAD3,SRC,STAT1,STAT3,TP53,TP73,TSC2,VEGFA,YAP1	3	1.7e-11	4.28e-09	0.0001	ABCA9,ABCF3,ACADM,ACOT7,ACSF2,AGGF1,AK1,AKR1B1,ANAPC4,ANG,APOBEC3B,Arf2,ARHGAP33,ARHGAP35,ARL2BP,ARL6IP1,ARVCF,ASRGL1,ASTN1,ATG14,ATG4C,ATP1A1,B3GALT5,BSCL2,BUB1B,BUB3,CAMK1D,CAND1,CAPRIN1,CARD11,CASP4,CASS4,CAV2,CBLB,CCNB2,CCT3,CCT7,CEP250,CHD7,CLU,COG2,CSF1R,CSNK1D,CTSD,DBF4,DCAF6,DFFA,DNAJA3,DONSON,DUSP6,DUSP7,ECSIT,EEF2,EIF3G,EIF4G3,ELF2,EPHA1,ETFA,ETS2,EXOSC7,FAIM2,FAM102A,FASTK,FBXW7,FCGR2A…	208 (61)	58
NPM1	transcription regulator	26s Proteasome,ABL1,AHR,Akt,AKT1,AR,Arf,ATF3,BHLHE40,CCND1,CDC25A,CDKN1A,CDKN2A,CEBPA,Creb,CSF2,DDX5,E2F1,EIF2AK2,EIF2AK3,EIF4E,ERBB2,estrogen receptor,FADD,FAS,FOXO3,GLI1,GRM1,HIF1A,IGF1R,IGFBP3,IL1B,IL6,ILF3,IRF1,IRF3,IRF4,KAT2B,mir-145,mir-21,MMP3,MTOR,MYC,NANOG,NFE2L2,NFkB (complex),NFKB2,NOTCH1,NPM1,NR1I2,p70 S6k,PGR,PI3K (complex),PKD1,PPIF,PRKAA1,PRKCD,RB1,SIAH1,STAT3,STAT4,TERT,TP53,TP63,…	3	1.92e-11	4.69e-09	0.0003	ABCF3,ACADM,ACOT7,ACSF2,ADRA2A,AGGF1,AIMP2,AK1,AKR1B1,ANAPC4,ANG,Arf2,ARL6IP1,ARVCF,ASTN1,ATG14,ATG4C,ATP1A1,ATP8A1,B4GALT6,BUB1B,BUB3,CAMK1D,CAND1,CARD11,CASS4,CAV2,CCNB2,CCR1,CCT7,CHD7,CHPT1,CLTA,CLU,CNNM1,COG2,CSF1R,CSNK1D,CTSD,CTSZ,CX3CR1,DBF4,DCAF6,DFFA,DNAJA3,DONSON,DROSHA,DUSP6,DUSP7,E2F4,ECSIT,EEF2,EIF4G3,ELF2,ESYT3,ETFA,ETS2,EXOSC7,FAIM2,FAM102A,FAM3A,FAM98B,FASTK,FBXO11,FBXW7,FIGNL1,FKB…	226 (66)	63
ZEB1	transcription regulator	BAX,BBC3,CCND1,CHEK1,MMP14,MYC,Notch,SERPINE1,STAT3,TP53,USP7,ZEB1	2	2.08e-11	4.86e-09	0.0001	ABCF3,ACADM,ACSF2,AIMP2,AK1,AKR1B1,ANAPC4,ANXA7,ARVCF,ATG4C,ATP1A1,BUB1B,CAND1,CARD11,CAV2,CCNB2,CCR1,CCT3,CLU,CPD,CSDE1,CSF2RB,CSNK1D,CTNNA1,CTSD,DAXX,DBF4,DDX60,DNAJA3,DROSHA,DUSP6,DUSP7,E2F4,ECSIT,EEF2,EIF3G,EIF4G3,ETFA,EXOSC7,FAM102A,FBXW7,FCGR2A,FGFR1,FKBP1A,FYN,GAS7,GBP5,GOT2,HADHB,HLA-DRB5,HLTF,HSP90AB1,HSPA9,IMPACT,INPP4A,IRF5,ITGA5,KCNQ1OT1,KMT2D,L3MBTL2,LIG3,MAG,MAP1B,MAPK1,MCAT,MGAT5,M…	128 (12)	12
TRIM31	enzyme	26s Proteasome,ABL1,Akt,AKT1,BHLHE40,CASP8,CCND1,CDKN1A,CDKN2A,CEBPA,CTNNB1,DDX5,E2F1,EIF2AK3,EIF4E,ERBB2,ERK1/2,FAS,FOXO3,GLI1,GSK3B,HIF1A,HNF4A,IGF1R,IGFBP3,IL6,JUN,KAT2B,MAPK8,MAPK9,mir-145,mir-23,MTOR,MYC,NANOG,NFKBIA,NLRP3,NOTCH1,NPM1,p70 S6k,PGR,PI3K (complex),PPARG,PPIF,PRKAA1,RB1,SMAD3,SP1,STING1,TP53,TP73,TRIM31,TSC2	3	2.19e-11	4.86e-09	0.0001	ABCF3,ACADM,ACOT7,ACOX1,ACSF2,AGGF1,AIMP2,AK1,AKR1B1,ANAPC4,ANG,APOBEC3B,Arf2,ARHGAP35,ARL6IP1,ARVCF,ASRGL1,ASTN1,ATG14,ATG4C,ATP1A1,B3GALT5,BSCL2,BUB1B,BUB3,CAMK1D,CAND1,CAPRIN1,CARD11,CASP4,CASS4,CAV2,Ccl27a,CCNB2,CCT3,CHD1,CHD7,CLU,COG2,CSF1R,CSNK1D,CTSD,DBF4,DCAF6,DDX60,DFFA,DNAJA3,DONSON,DUSP6,DUSP7,E2F4,ECE1,ECSIT,EEF2,EIF3G,EIF4G3,ELF2,EPHA1,ETFA,EXOSC7,FAIM2,FASTK,FBXW7,FCGR2A,FKBP1A,FOXO…	202 (53)	53
PI3K (family)	group	Akt,AKT1,Creb,ELAVL1,ERK1/2,FOXO1,Gsk3,GSK3B,HMGA1,IRF3,MYC,NFKBIA,Notch,PI3K (family),PIK3C3,PIK3CA,PIK3CG,PLCG2,PPARGC1A,PRKCD,PTK2,RAS,REL,RELA,SLC12A2,SP1,SREBF1,SREBF2,STAT1,STAT3,SYK,TP53	2	2.27e-11	4.86e-09	0.0001	9930111J21Rik1/Gm12185,ABCC4,ABCF3,ABHD2,ACADM,ACOX1,ACSF2,AIMP2,AKR1B1,ANAPC4,ANG,APOBEC3B,ARL2BP,ARVCF,ATG14,ATG4C,ATP8A1,B3GALT5,BUB1B,CAMK1D,CAND1,CARD11,CCT3,CHD1,CSDE1,CSF2RB,CSNK1D,CTSD,CTSZ,CX3CR1,DAGLB,DBF4,DDX60,DNAJA3,DUSP7,E2F4,ECE1,ECSIT,EEF2,EIF3G,EIF4G3,ETFA,ETS2,EXOSC7,FAM102A,FBXW7,FCGR2A,FGFR1,FHIT,FKBP1A,FOXO4,GAS7,GCNT2,GOT2,GTF2I,HADHB,HELZ2,HJURP,HLA-DRB5,HSP90AB1,HSPA9,IMPA…	156 (32)	32
FOXD1	transcription regulator	26s Proteasome,AHR,Akt,AKT1,CCND1,CEBPA,CEBPB,CNTF,CREB1,CSF2,EGFR,EIF2AK3,ERN1,estrogen receptor,FOS,FOXD1,FOXO3,GATA1,Gsk3,HIF1A,HNF4A,HSPD1,IFNG,IFNGR1,Ige,IL10,IL17A,IL2,IL2RG,IL4,IL4R,IL5,IRF1,IRF4,IRF9,MAP2K1/2,MAPK1,MAPK14,MMP3,MTOR,MTORC1,MYC,NFAT (complex),NFAT5,NFATC2,NFkB (complex),NFKBIA,NOS2,NOTCH1,NR1I2,OSM,PI3K (complex),PPARD,PRKAA1,PRKAA2,PRKCA,PTPN11,PTPN6,RAF1,SFPQ,SRC,STAT3,ST…	3	2.27e-11	4.86e-09	0.0001	ABCA9,ABCF3,ACOX1,ACSF2,AGGF1,AK1,ANAPC4,ANKS1A,ARAP2,Arf2,ARHGAP33,ARHGAP35,ARID4A,ARVCF,ATG4C,ATP1A1,ATP8A1,B3GALT5,B3GAT2,BUB1B,C17orf99,CAMK1D,CAND1,CASP4,CASS4,CBLB,CCDC15,Ccl27a,CCNB2,CCR1,CCT3,CEP250,CHD1,CLK1,CLTA,CNNM1,CPD,CSDE1,CSF2RB,CSNK1D,CTNNA1,CTSD,CTSZ,CTTNBP2,CX3CR1,DAXX,DBF4,DCAF6,DDHD1,DDX60,DNAJA3,DOCK10,DUSP3,DUSP6,DUSP7,E2F4,ECE1,ECSIT,EIF3G,EIF4G3,EPHA1,EPHA4,ETFA,ETS2,EVL,…	242 (69)	67
OXSR1	kinase	26s Proteasome,ABL1,AR,BHLHE40,BRCA1,CASP8,CCN2,CCND1,CDC25A,CDKN1A,CDKN2A,CEBPA,CTNNB1,DDX5,E2F1,EGFR,EIF2AK3,EIF4E,ERBB2,ERN1,ESR1,FAS,FOXO1,FOXO3,GLI1,HIF1A,IGFBP3,IRF7,JUN,KAT2B,MAPK9,mir-145,MYC,NANOG,NFKBIA,NOTCH1,NPM1,OXSR1,p70 S6k,PGR,PKN1,PPARG,PPARGC1A,PPIF,PRKAA1,SLC12A2,SMAD2,SMAD3,SP1,STK11,Tgf beta,TGFB1,TGM2,TP53,TP73,TSC2	3	2.3e-11	4.86e-09	0.0004	ABCF3,ACADM,ACOT7,ACSF2,AK1,AKR1B1,ANAPC4,APOBEC3B,Arf2,ARID4A,ARL6IP1,ARSG,ARVCF,ASRGL1,ASTN1,ATG4C,ATP1A1,ATP8A1,B3GALT5,B4GALT6,BSCL2,BUB1B,BUB3,CACNA1C,CAMK1D,CAND1,CARD11,CASP4,CASS4,CAV2,Ccl27a,CCNB2,CDO1,CEP250,CHD7,CHPT1,CLK1,CLU,COPA,CSF1R,CSNK1D,CTSD,DBF4,DCAF6,DFFA,DNAJA3,DONSON,DUSP3,DUSP6,DUSP7,ECSIT,EEF2,EIF3G,EIF4G3,EIF4H,ELF2,EPHA1,ESYT3,ETFA,ETS2,EXOSC7,FAIM2,FAM3A,FARSB,FASTK,FB…	219 (56)	55
MTORC2	complex	Akt,AKT1,AKT2,EIF4B,Gsk3,GSK3B,MAPKAP1,MTOR,MTORC2,NFkB (family),Pkc(s),RHOA,RICTOR,TP53	2	2.36e-11	4.86e-09	0.0001	ACSF2,AIMP2,AK1,AKR1B1,ANAPC4,ARVCF,ATG4C,ATP1A1,ATP6V1G2,BUB1B,CACNA1C,CAND1,CARD11,CASP4,CAV2,CCNB2,CCR1,CHD1,CLU,Cox6c,CPD,CSF1R,CSNK1D,CTSD,DAXX,DBF4,DNAJA3,DUSP6,E2F4,EIF4G3,ETFA,FBXW7,FHIT,FKBP1A,FYN,GADD45G,GAS7,GCNT2,GOT2,GSDMD,HADHB,Hmgn2 (includes others),HSP90AB1,INPP4A,IRF5,ITGA5,KMT2D,L1CAM,LMBRD1,MAG,MAPK1,MCAT,MGAT5,MSR1,MTHFD2,MYB,MYO6,NDUFA7,NDUFAB1,NDUFB4,NDUFC2,NDUFS6,NFAM1,NFK…	110 (14)	13
NCOA4	transcription regulator	AHR,Akt,AKT1,ALDH1A1,APP,AR,Calcineurin protein(s),CASP8,CCNE1,Creb,CREB1,CYP19A1,EGF,EGFR,EP300,ERBB2,ERK,ERK1/2,ESR1,ESR2,G protein alpha i,GATA1,GSK3B,HIF1A,IFN alpha/beta,IGF1R,L-triiodothyronine,MITF,NCOA4,NFKBIA,Nr1h,NR3C1,NR4A1,PI3K (complex),PRKCD,RAF1,RB1,RUNX2,Rxr,RXRA,RXRB,SMAD3,SP1,SRC,SREBF2,STAT5B,STING1,T3-TR-RXR,tamoxifen,THRB,TP53,UBA3,ZFP36	3	2.46e-11	4.93e-09	0.0003	ABCA9,ABCC4,ABHD2,ACADM,ACOT7,ACOX1,ACSF2,AGGF1,AIMP2,AK1,AKR1B1,ANAPC4,ANG,ANKS1A,ARHGAP26,ARHGAP33,ARHGAP35,ARL6IP1,ARSG,ARVCF,ATG4C,ATP8A1,B3GALT5,B4GALT6,BSCL2,BUB1B,BUB3,CACNA1C,CAND1,CARD11,CBLB,Ccl27a,CCT3,CCT7,CDO1,CEP250,CHD7,CHPT1,CLK1,COG2,COPA,Cox6c,CSF2RB,CSNK1D,CTNNA1,CTSD,CTSZ,CX3CR1,DBF4,DDX10,DDX60,DNAJA3,EEF2,EIF4G3,ELF2,EPHA4,ESYT3,ETFA,ETS2,EVL,EXOSC7,FAM3A,FBXW7,FCGR2A,FGFR1,…	206 (53)	53
APEX1	enzyme	26s Proteasome,ABL1,AHR,AKT1,Ap1,APEX1,APLN,ATG5,BHLHE40,c-Src,CDKN2A,CDX1,CEBPA,CRTC2,CSF2,DDX5,E2F1,EGFR,EIF2AK3,EIF4E,ESRRA,FAS,FOXO1,FOXP3,GABARAPL2,GLI1,Hif1,HIF1A,HNF4A,HSF1,HSPD1,IGF1,IGF1R,IKK (complex),IL1B,IL2,IL6,IRF4,KAT2B,MAPK1,mir-145,MTOR,MYC,NAMPT,Nfat (family),NFE2L2,NFKB1,NFKBIA,NOTCH1,NPM1,PGR,POLB,PPARG,PPARGC1A,PPIF,PRKAA1,PTEN,RARB,SIRT1,SMAD3,SP1,SREBF1,STK11,temozolomide,T…	3	2.75e-11	5.38e-09	0.0004	ABCA9,ABCF3,ACOT7,ACSF2,ACTR1B,AGAP2,AGGF1,AK1,AKR1B1,ANAPC4,Arf2,ARL6IP1,ARSG,ARVCF,ATG4C,ATP1A1,B3GALT5,B4GALT6,BSCL2,BUB1B,BUB3,CAMK1D,CAND1,CAPRIN1,CARD11,CASP4,CASS4,CATSPER2,CAV2,CCNB2,CCT7,CDO1,CLK1,CLTA,CLU,COG2,Cox6c,CSF1R,CSNK1D,CTSD,DBF4,DCAF6,DDX60,DFFA,DNAJA3,DOCK10,DONSON,DROSHA,DUSP6,DUSP7,ECE1,ECSIT,EDEM2,EIF4G3,EPHA1,ETFA,ETS2,EVA1B,EVL,EXOSC7,FAIM2,FANCF,FASTK,FBXW7,FCGR2A,FGFR1…	226 (72)	68
TSC22D1	transcription regulator	26s Proteasome,ABL1,AKT1,AR,BHLHE40,BRCA1,CASP8,CCN2,CCND1,CDC25A,CDKN1A,CDKN2A,CEBPA,Creb,CTNNB1,DDX5,E2F1,EGFR,EIF2AK3,EIF4E,ERBB2,ERN1,FAS,FOXO1,FOXO3,GLI1,HIF1A,IGFBP3,IRF7,JUN,KAT2B,MAPK8,MAPK9,mir-145,MYC,NANOG,NFKBIA,NOTCH1,NPM1,PGR,PPARG,PPARGC1A,PPIF,PRKAA1,SMAD2,SMAD3,SP1,STK11,Tgf beta,TGFB1,TGFBR1,TGM2,TP53,TP73,TSC2,TSC22D1,YAP1	3	2.97e-11	5.68e-09	0.0001	ABCF3,ACADM,ACOT7,ACSF2,AGGF1,AK1,AKR1B1,ANAPC4,APOBEC3B,Arf2,ARID4A,ARL6IP1,ARVCF,ASRGL1,ASTN1,ATG4C,ATP1A1,ATP8A1,B3GALT5,B4GALT6,BSCL2,BUB1B,BUB3,CACNA1C,CAMK1D,CAND1,CARD11,CASP4,CASS4,CAV2,Ccl27a,CCNB2,CCR1,CDO1,CHD7,CHPT1,CLK1,CLU,COG2,CSF1R,CSNK1D,CTSD,DBF4,DCAF6,DFFA,DNAJA3,DONSON,DUSP3,DUSP6,DUSP7,ECSIT,EIF3G,EIF4G3,EIF4H,ELF2,EPHA1,ESYT3,ETFA,ETS2,EXOSC7,FAIM2,FAM3A,FARSB,FASTK,FBXW7,FC…	216 (57)	56
FOXJ1	transcription regulator	26s Proteasome,AHR,AKT1,CCND1,CEBPA,CEBPB,CFTR,CNTF,CREB1,CSF2,EGFR,EIF2AK3,ERBB2,ERN1,estrogen receptor,EZR,FOS,FOXJ1,FOXO3,GATA1,Gsk3,HIF1A,HNF4A,HSPD1,IFNG,IFNGR1,Ige,IL10,IL17A,IL2,IL2RG,IL4,IL4R,IL5,IRF1,IRF4,IRF9,MAP2K1/2,MAPK1,MMP3,MTOR,MTORC1,MYC,NFAT (complex),NFAT5,NFATC2,NFkB (complex),NFKBIA,NOS2,NR1I2,OSM,PLCG2,PPARD,PRKAA1,PRKAA2,PRKCA,PTPN11,PTPN6,RAF1,SFPQ,SRC,STAT3,STAT5B,STK11,S…	3	3.34e-11	6.13e-09	0.0001	ABCA9,ABCF3,ACOX1,ACSF2,AGGF1,AK1,ANAPC4,ANKS1A,ARAP2,Arf2,ARHGAP33,ARHGAP35,ARID4A,ARVCF,ATG4C,ATP1A1,ATP8A1,B3GALT5,B3GAT2,BUB1B,C17orf99,CAMK1D,CAND1,CASP4,CASS4,CBLB,CCDC15,Ccl27a,CCNB2,CCR1,CCT3,CEP250,CHD1,CHD7,CLK1,CLTA,CNNM1,CPD,CSDE1,CSF2RB,CSNK1D,CTNNA1,CTSD,CTSZ,CTTNBP2,CX3CR1,DAGLB,DAXX,DBF4,DCAF6,DDHD1,DDX60,DNAJA3,DOCK10,DUSP3,DUSP6,DUSP7,E2F4,ECE1,ECSIT,EIF3G,EIF4G3,ELF2,EPHA1,EPHA…	240 (69)	66
FRAX120	chemical drug	ABL1,Akt,CASP1,CASP8,Creb,CTNNB1,ERK,ESR1,estrogen receptor,FRAX120,Insulin,Jnk,JUN,MAP2K1,MAP3K1,MAPK1,MAPK10,MAPK11,MAPK12,MAPK13,MAPK14,MAPK3,MAPK8,MAPK9,MYC,MYO6,Nfat (family),NFkB (complex),PAK1,PAK2,PAK3,PAK4,Pka,PREX1,RAF1,RELA,TNNI3,TP53	3	3.47e-11	6.13e-09	0.0002	ABCC4,ABCF3,ABHD2,ACOT7,ACSF2,ADRA2A,AGGF1,AIMP2,AKR1B1,ANAPC4,APOB,ARL6IP1,ARSG,ARVCF,ASRGL1,ATG4C,ATP1A1,BSCL2,BUB3,CACNA1C,CAND1,CARD11,Ccl27a,CCR1,CCT3,CCT7,CEP250,CLK1,CNNM1,COG2,COPA,CSDE1,CSNK1D,CTNNA1,DAXX,DBF4,DDX60,DNAJA3,DOCK10,DROSHA,DUSP7,E2F4,ECSIT,EEF2,EIF3G,EIF4G3,EMP3,ETFA,EXOSC7,FAM53A,FBXW7,FHIT,FKBP1A,FLT1,FOXO4,FYN,FZD5,GADD45G,GALNT1,GAS7,GCNT2,GOT2,GSDMD,Hmgn2 (includes oth…	162 (38)	34
FRAX355	chemical drug	ABL1,Akt,CASP1,CASP8,Creb,CTNNB1,ERK,ESR1,estrogen receptor,FRAX355,Insulin,Jnk,JUN,MAP2K1,MAP3K1,MAPK1,MAPK10,MAPK11,MAPK12,MAPK13,MAPK14,MAPK3,MAPK8,MAPK9,MYC,MYO6,Nfat (family),NFkB (complex),PAK1,PAK2,PAK3,PAK4,Pka,PREX1,RAF1,RELA,TNNI3,TP53	3	3.47e-11	6.13e-09	0.0002	ABCC4,ABCF3,ABHD2,ACOT7,ACSF2,ADRA2A,AGGF1,AIMP2,AKR1B1,ANAPC4,APOB,ARL6IP1,ARSG,ARVCF,ASRGL1,ATG4C,ATP1A1,BSCL2,BUB3,CACNA1C,CAND1,CARD11,Ccl27a,CCR1,CCT3,CCT7,CEP250,CLK1,CNNM1,COG2,COPA,CSDE1,CSNK1D,CTNNA1,DAXX,DBF4,DDX60,DNAJA3,DOCK10,DROSHA,DUSP7,E2F4,ECSIT,EEF2,EIF3G,EIF4G3,EMP3,ETFA,EXOSC7,FAM53A,FBXW7,FHIT,FKBP1A,FLT1,FOXO4,FYN,FZD5,GADD45G,GALNT1,GAS7,GCNT2,GOT2,GSDMD,Hmgn2 (includes oth…	162 (38)	34
RPL11	other	MDM2,MYC,RPL11,TP53	2	3.63e-11	6.13e-09	0.0001	ABCC4,ABCF3,ACADM,ACSF2,AIMP2,AK1,AKR1B1,ANAPC4,APOB,ARVCF,ATG4C,ATP1A1,BUB1B,CAND1,CARD11,CASP4,CAV2,CCNB2,CCT3,CLU,CPD,CSDE1,CSNK1D,CTNNA1,CTSD,DBF4,DDX60,DNAJA3,DROSHA,DUSP6,DUSP7,ECSIT,EEF2,EIF3G,EIF4G3,ETFA,EXOSC7,FBXW7,FGFR1,FKBP1A,FYN,GADD45G,GAS7,GOT2,HADHB,HSP90AB1,HSPA9,IMPACT,INPP4A,IRF5,KCNQ1OT1,KMT2D,LIG3,MAG,MAPK1,MCAT,MPHOSPH6,MSR1,MTHFD2,MYO6,NAT10,NDUFS6,NFAM1,NFKB2,NRF1,NUP153,N…	111 (4)	3
miR-30c-5p (and other miRNAs w/seed GUAAACA)	mature microRNA	26s Proteasome,ABL1,Akt,AKT1,Alp,BHLHE40,CASP8,CBL,CCND1,CDKN1A,CDKN2A,CEBPA,Creb,CTNNB1,DDX5,E2F1,EIF2AK3,EIF4E,ERBB2,ERK1/2,FAS,FOXO3,GLI1,HIF1A,HNF4A,IGF1R,IL6,JUN,KAT2B,MAPK8,MAPK9,mir-145,mir-23,miR-30c-5p (and other miRNAs w/seed GUAAACA),MTOR,MYC,NANOG,NFKBIA,NOTCH1,NPM1,p70 S6k,PGR,PI3K (complex),PPARG,PPIF,PRKAA1,PRL,RB1,SMAD3,SP1,STAT3,STING1,TP53,TP73,TSC2	3	3.66e-11	6.13e-09	0.0003	ABCF3,ACADM,ACOT7,ACSF2,ADRA2A,AGGF1,AIMP2,AK1,AKR1B1,ANAPC4,ANG,APOBEC3B,Arf2,ARHGAP35,ARL6IP1,ARVCF,ASRGL1,ASTN1,ATG14,ATG4C,ATP1A1,B3GALT5,BSCL2,BUB1B,BUB3,CAMK1D,CAND1,CAPRIN1,CARD11,CASP4,CASS4,CAV2,Ccl27a,CCNB2,CCT3,CHD1,CHD7,CLU,COG2,CSF1R,CSNK1D,CTSD,DBF4,DCAF6,DDX60,DFFA,DNAJA3,DONSON,DUSP6,DUSP7,E2F4,ECE1,ECSIT,EEF2,EIF3G,EIF4G3,ELF2,EPHA1,EPHA4,ETFA,EXOSC7,FAIM2,FAM102A,FASTK,FBXW7,FCG…	214 (55)	54
stigmatellin	chemical reagent	26s Proteasome,Akt,AKT1,AR,BHLHE40,CASP8,CCND1,CCR2,CDKN2A,CEBPA,CEBPB,Creb,CREB1,DDX5,DUSP1,E2F1,EGFR,EIF2AK3,EIF4E,ERBB2,ERK1/2,ESR1,ETS1,ETS2,FAS,FOS,FOXO3,GATA1,GLI1,GSK3B,HIF1A,HNF4A,IGF1R,IKK (complex),IL10,IL6,IRF1,JUN,KAT2B,MAPK1,MAPK8,MAPK9,MED1,mir-145,MITF,MTOR,MYC,MYRF,NANOG,Nfat (family),NFE2L2,NFKBIA,NOTCH1,NPM1,NR1I3,p70 S6k,PPIF,PRKAA1,PTGS2,PTPRR,RAF1,RB1,RPTOR,RRAS2,SP3,SRF,STAT…	3	3.71e-11	6.13e-09	0.0001	ABCF3,ACADM,ACSF2,AGGF1,AIMP2,AK1,AKR1B1,ANAPC4,ANG,ANKS1A,APBA1,APOBEC3B,ARAP2,Arf2,ARHGAP33,ARL6IP1,ARSG,ARVCF,ASTN1,ATG14,ATG4C,ATP1A1,ATP8A1,B3GALT5,B3GAT2,B4GALT6,BUB1B,CACNA1C,CAND1,CAPRIN1,CARD11,CASP4,CASS4,CAV2,Ccl27a,CCNB2,CCT3,CCT7,CEP250,CHD1,CHD7,CHPT1,CLK1,CLU,COG2,COPA,CSF1R,CSNK1D,CTSD,DBF4,DCAF6,DFFA,DNAJA3,DOCK10,DONSON,DUSP6,DUSP7,ECE1,ECSIT,EEF2,EIF3G,EIF4G3,ELF2,ESYT3,ETFA,EX…	229 (74)	73
butyric acid	chemical - endogenous mammalian	AR,bezafibrate,bortezomib,butyric acid,calcitriol,CASP1,CASP8,CCNE1,Creb,E2F1,ERK,ERK1/2,FFAR3,Gsk3,HIF1A,HTT,LY294002,MAPK8,MAPK9,MYC,Nfat (family),NFkB (complex),Pka,PRKAA,PTGS2,RAS,RELA,SP1,SP3,STAT1,STAT5a/b,TP53,Z-LLL-CHO	2	3.8e-11	6.13e-09	0.0001	ABCC4,ABCF3,ABHD2,ACOX1,ACSF2,ADRA2A,AIMP2,AK1,ANAPC4,ANG,APBA1,APOBEC3B,ARVCF,ATG14,ATG4C,ATP1A1,ATP8A1,AURKAIP1,B3GALT5,B4GALT6,BUB3,CAND1,CARD11,Ccl27a,CCR1,CCT3,CDO1,CHD1,CHPT1,CLU,CNNM1,COQ9,CPD,CSF2RB,CSNK1D,CTNNA1,CX3CR1,DAXX,DBF4,DDX60,DNAJA3,DOCK10,DUSP7,E2F4,ECE1,ECSIT,EEF2,EIF3G,EIF4G3,EMP3,EPHA4,ESYT3,ETFA,ETS2,EXOSC7,FAM3A,FANCF,FASTK,FBXW7,FGFR1,FHIT,FIGNL1,FKBP1A,FOXO4,GAS7,GBP5,GP…	167 (33)	33
Arf	group	26s Proteasome,ABL1,AKT1,APOB,AR,Arf,ARF1,ARF5,ARF6,BHLHE40,BRCA1,CASP8,CCND1,CEBPA,Creb,CTNNB1,DDX5,E2F1,EGF,EGFR,EIF2AK3,EIF4E,ERBB2,FAS,FOXO1,FOXO3,GLI1,GLI3,GSK3B,HNF4A,IGF1R,IGFBP3,IL6,IRF3,KAT2B,KAT5,MAPK1,MAPK8,MAPK9,MDM2,mir-145,mir-23,MTOR,MYC,MYCN,NANOG,NFE2L2,NFKBIA,NOTCH1,NPM1,p70 S6k,PGR,PLD,PPARG,PPIF,PRKAA1,RB1,RUNX3,SMAD3,SP1,STAT3,TP53,TP63,USP7	3	3.82e-11	6.13e-09	0.0005	ABCC4,ABCF3,ACADM,ACSF2,AK1,AKR1B1,ALDH1L2,ANAPC4,ANG,APOB,Arf2,ARHGAP35,ARL6IP1,ARVCF,ASRGL1,ASTN1,ATG4C,ATP8A1,B3GALT5,B4GALT6,BIVM,BSCL2,BUB1B,BUB3,CAMK1D,CAND1,CAPRIN1,CARD11,CASP4,CAV2,Ccl27a,CCNB2,CCT3,CCT7,CDO1,CHD1,CHD7,CHPT1,CLK1,CLU,COG2,CSF1R,CSNK1D,DBF4,DFFA,DNAJA3,DOCK10,DROSHA,DUSP3,DUSP6,DUSP7,ECSIT,EEF2,EIF3G,EIF4G3,ELF2,EPHA1,ESYT3,ETFA,ETS2,EXOSC7,EXTL3,FAIM2,FAM102A,FAM3A,FASTK…	215 (64)	60
SP100	transcription regulator	26s Proteasome,Akt,AKT1,ARID3A,BHLHE40,CASP8,CCND1,CDKN1A,CDKN2A,CEBPA,CEBPB,CTNNB1,DNMT3A,E2F1,EIF2AK3,EIF4E,ERBB2,ERK1/2,ESR1,ESR2,FAS,FOXA1,FOXA2,FOXO3,GLI1,HIF1A,HNF4A,IGFBP3,IL6,JUN,KAT2B,MAPK8,MAPK9,mir-145,MTOR,MYC,NANOG,NFkB (complex),NFKBIA,NOTCH1,NPM1,p70 S6k,PGR,PI3K (complex),PPARG,PPIF,PRKAA1,RB1,SMAD3,SP1,SP100,STAT3,STING1,TCF20,TCF4,TEAD1,TP53,TP73,transcription factor,TSC2	3	3.9e-11	6.15e-09	0.0007	ABCF3,ACADM,ACOT7,ACSF2,ADRA2A,AGGF1,AIMP2,AK1,AKR1B1,ANAPC4,ANG,APOBEC3B,Arf2,ARHGAP35,ARL6IP1,ARSG,ARVCF,ASRGL1,ASTN1,ATG14,ATG4C,ATP1A1,B3GALT5,BSCL2,BUB1B,CACNA1C,CAMK1D,CAND1,CAPRIN1,CARD11,CASP4,CASS4,CAV2,Ccl27a,CCNB2,CCT3,CCT7,CDO1,CEP250,CHD7,CLU,CNNM1,COG2,COPA,Cox6c,CSF1R,CSNK1D,CTSD,DBF4,DCAF6,DDX10,DDX60,DFFA,DNAJA3,DOCK10,DONSON,DUSP6,DUSP7,E2F4,ECE1,ECSIT,EEF2,EIF3G,EIF4G3,ELF2,EPH…	225 (60)	59
MUS81	enzyme	26s Proteasome,ABL1,AKT1,BHLHE40,BRCA1,CASP8,CCND1,CDKN1A,CDKN2A,CEBPA,CHEK2,CTNNB1,DDX3X,DDX5,DNMT3A,E2F3,EIF2AK3,EIF4E,ERBB2,ERK1/2,FAS,FOXO3,GABARAPL2,GLI1,HIF1A,HNF4A,IGF1R,IGFBP3,IKBKB,IKK (complex),IL6,IRF3,IRF5,IRF7,KAT2B,MAPK8,MAPK9,mir-145,mir-23,MUS81,MYC,NANOG,NOTCH1,NPM1,p70 S6k,PEBP1,PGR,PPARG,PPIF,PRKAA1,SMAD3,SP1,STAT1,STAT3,TBK1,TP53,TP73,TRIM28,TSC2	3	4.2e-11	6.49e-09	0.0001	ABCF3,ACADM,ACOT7,ACSF2,AGGF1,AK1,AKR1B1,ANAPC4,ANG,APOBEC3B,Arf2,ARHGAP35,ARL6IP1,ARSG,ARVCF,ASRGL1,ASTN1,ATG4C,ATP1A1,BSCL2,BUB1B,CACNA1C,CAMK1D,CAND1,CAPRIN1,CARD11,CASP4,CASS4,CAV2,CBLB,Ccl27a,CCNB2,CCT3,CHD7,CLU,COG2,CSF1R,CSNK1D,CTSD,DBF4,DCAF6,DFFA,DNAJA3,DONSON,DUSP3,DUSP6,DUSP7,ECSIT,EEF2,EIF3G,EIF4G3,ELF2,EPHA1,ETFA,EXOSC7,FAIM2,FAM102A,FANCF,FASTK,FBXW7,FCGR2A,FKBP1A,FOXO4,FYN,FZD5,G6P…	196 (59)	57
KCTD12	ion channel	AKT1,APP,AR,AURKA,BRCA1,CDC20,CDC25A,CDK1,CDKN1B,ERK1/2,EZH2,FADD,FOS,FOXM1,FOXO1,FOXO3,HMGA1,ING1,JUN,KAT5,KCTD12,MAPK14,MASTL,MCL1,MDM2,MYC,MYOD1,NFKBIA,NPM1,PAX8,PKM,PTTG1,RB1,RPS6KB1,SOX2,SRC,SRC (family),TP53,TP73,TSC1,YAP1	3	4.55e-11	6.79e-09	0.0001	ABCA9,ABCC4,ABCF3,ACOX1,ACSF2,AGGF1,AIMP2,AK1,AKR1B1,ALDH1L2,ANAPC4,ANG,APOB,ARL2BP,ATG14,ATP8A1,B4GALT6,CAMK1D,CAND1,CARD11,CASS4,CCR1,CCT3,CDO1,CHPT1,CPD,CSDE1,CSF2RB,CSNK1D,CTNNA1,CTSZ,DAXX,DBF4,DCAF6,DDX60,DIDO1,DNAJA3,DOCK10,DROSHA,DUSP3,DUSP7,E2F4,ECE1,EEF2,EIF3G,EIF4G3,ESYT3,ETFA,EVL,EXOSC7,FAM3A,FCGR2A,FKBP1A,FYN,GADD45G,GALNT1,GAS7,GOLGA7,GOT2,GPR137B,GTF2I,HEXB,HSP90AB1,HSPA9,IMPACT,JAR…	163 (41)	38
SMARCD1	transcription regulator	26s Proteasome,ABL1,AKT1,AR,BHLHE40,CASP8,CAV1,CCND1,CDKN1A,CDKN2A,CEBPA,CTNNB1,DDX5,E2F1,EIF2AK3,EIF4E,ERBB2,FAS,FOS,FOXO3,GATA1,GLI1,GSK3B,HIF1A,HNF4A,IGF1R,IGFBP3,IL6,IRF9,JUN,KAT2B,MAPK8,MAPK9,MED1,mir-145,mir-23,MTOR,MYC,NANOG,NFkB (complex),NFKBIA,NOTCH1,NPM1,Nr1h,NR3C1,PGR,PPARG,PPIF,PRKAA1,PTGS2,RB1,SMAD3,SMARCD1,SP1,STAT1,STAT3,STING1,Tgf beta,TP53,TP73,TSC2	3	4.56e-11	6.79e-09	0.0005	ABCF3,ABHD2,ACADM,ACOT7,ACSF2,ADRA2A,AGGF1,AK1,AKR1B1,ANAPC4,ANG,APOBEC3B,Arf2,ARHGAP35,ARID4A,ARL6IP1,ARVCF,ASRGL1,ASTN1,ATG14,ATG4C,ATP1A1,ATP8A1,B3GALT5,B4GALT6,BSCL2,BUB1B,BUB3,CAMK1D,CAND1,CAPRIN1,CARD11,CASP4,CASS4,CAV2,Ccl27a,CCNB2,CCR1,CCT3,CDO1,CHD1,CHD7,CHPT1,CLU,COG2,CSF1R,CSNK1D,CTSD,CX3CR1,DBF4,DCAF6,DDX60,DFFA,DNAJA3,DONSON,DUSP6,DUSP7,ECSIT,EIF3G,EIF4G3,ELF2,EPHA1,ESYT3,ETFA,ETS2,E…	220 (61)	60
PARK7	enzyme	Akt,AKT1,ERK1/2,GSK3B,HIF1A,OTUD7B,PARK7,PRKCB,PTEN,SMAD3,TP53	2	4.83e-11	7.02e-09	0.0001	ABCA9,ABCC4,ACADM,ACOX1,ACSF2,AIMP2,AK1,AKR1B1,ANAPC4,ARVCF,ATG4C,ATP1A1,BSCL2,BUB1B,CACNA1C,CAND1,CARD11,CAV2,CHD1,CLU,CPD,CSF1R,CSNK1D,CTNNA1,CTSD,DBF4,DNAJA3,DUSP6,E2F4,ECE1,EIF4G3,ETFA,ETS2,FBXW7,FGFR1,FHIT,FKBP1A,FLT1,FYN,GADD45G,GAS7,GCNT2,GOT2,GTF2I,HEXB,Hmgn2 (includes others),HSP90AB1,INPP4A,ITGA5,KLHL24,KMT2D,LMBRD1,MAPK1,MCAT,MEF2C,MGAT5,MRPL52,MSR1,MTHFD2,MYB,NAE1,NDUFC2,NDUFS6,NEU1,N…	114 (11)	10
oltipraz	chemical drug	ABL1,aflatoxin B1,AKT1,aristolochic acid I,BHLHE40,C/EBP,CCND1,CDKN1A,CDKN1B,CDKN2A,CEBPA,CEBPB,CHUK,Creb,CREB1,CYP1A1,CYP1A2,E2F1,EGFR,EIF2AK3,EIF4E,ERBB2,FAS,FMR1,FOXA2,FOXO1,FOXO3,GLI1,GST (complex),GSTO1,HMGA1,HNF4A,HTT,IKBKB,IL6,Insulin,IRF5,IRF7,IRS1,KAT2B,MAPK8,MAPK9,mir-145,mir-23,MYC,NANOG,NFKB2,NFKBIA,NPM1,NQO1,Nr1h,oltipraz,p70 S6k,PDK1,PGR,PIK3CG,PPARG,PPIF,PRKAA1,PTPN11,RB1,RICTOR,RP…	3	4.89e-11	7.02e-09	0.0003	ABCF3,ACADM,ACSF2,AGGF1,AK1,AKR1B1,ANAPC4,ANG,APOBEC3B,Arf2,ARHGAP33,ARHGAP35,ARL2BP,ARL6IP1,ARVCF,ATG14,ATG4C,ATP1A1,ATP6V1G2,B3GALT5,BSCL2,BUB1B,BUB3,CAMK1D,CAND1,CAPRIN1,CARD11,CASS4,CAV2,CBLB,CCNB2,CEP250,CHD7,CLK1,COG2,Cox6c,CSNK1D,CTSD,CTSZ,DBF4,DDX60,DFFA,DNAJA3,DONSON,DUSP7,ECSIT,EEF2,EIF3G,EIF4G3,ELF2,EPHA1,ETFA,EXOSC7,FAIM2,FAM102A,FASTK,FBXW7,FKBP1A,FOXO4,FYN,G6PC3,GABPB1,GADD45G,GAS7,…	202 (71)	65
LEF1	transcription regulator	AR,ATF4,BRCA1,CCND1,CDK4/6,CDKN1A,CDKN1B,CDKN2A,CEBPB,CREB1,CTNNB1,E2F4,EGFR,ERK1/2,ESRRA,F2,GLI1,GSK3B,HIF1A,JAG1,JUN,LEF1,MAPK14,MDM2,mir-22,MYC,NANOG,NFkB (complex),NFKBIA,Notch,NOTCH1,PPARG,PTEN,PTGS2,RAF1,RB1,RUNX2,SMAD3,SNAI2,SP1,STAT3,TCF3,TCF7L2,Tgf beta,TP53,TP73,VitaminD3-VDR-RXR,YBX1	3	5e-11	7.05e-09	0.0002	ABCA9,ABCC4,ABCF3,ABHD2,ACADM,ACSF2,ADRA2A,AGGF1,AIMP2,AK1,AKR1B1,ANAPC4,APOB,APOBEC3B,ARAP2,ARHGAP33,ARHGAP35,ARID4A,ARL6IP1,ASRGL1,ATP8A1,B3GALT5,B4GALT6,BSCL2,BUB1B,CACNA1C,CAMK1D,CAND1,CARD11,CASS4,CCNB2,CCT3,CDO1,CHPT1,CLU,CPD,CSDE1,CSF1R,CSF2RB,CSNK1D,CTNNA1,CTSD,CTSZ,CX3CR1,DAXX,DBF4,DCAF6,DDX60,DNAJA3,DOCK10,DONSON,DROSHA,DUSP3,DUSP7,ECSIT,EEF2,EIF3G,EIF4G3,EMP3,ESYT3,ETFA,ETS2,EXOSC7,FAM…	210 (48)	47
pentachlorophenol	chemical toxicant	2-amino-1-methyl-6-phenylimidazo-4-5-b-pyridine,ACHE,aflatoxin B1,AHR,Akt,AKT1,APP,AR,benzo(a)pyrene,BRCA1,Calcineurin protein(s),CREB1,CYP19A1,CYP1A2,EGF,EGFR,ERK,ERK1/2,ESR1,ESR2,G protein alpha i,GATA1,Gsk3,IFN alpha/beta,IGF1R,MAPK1,MAPK3,MAPT,MMP2,NFkB (complex),NFKBIA,Nr1h,pentachlorophenol,PI3K (complex),Pkc(s),PRKCD,PRKCE,PTK2,RUNX2,SP1,SRC,STAT5B,tamoxifen,TP53,UBA3	3	5.32e-11	7.26e-09	0.0003	ABCA9,ABHD2,ACADM,ACOT7,ACOX1,ACSF2,ADRA2A,AGGF1,AIMP2,AK1,AKR1B1,ANAPC4,ANG,APOB,ARHGAP33,ARHGAP35,ARL6IP1,ARSG,ARVCF,ATG4C,ATP8A1,B3GALT5,B4GALT6,BUB1B,BUB3,CAMK1D,CAND1,CARD11,CAV2,CBLB,CCR1,CCT3,CCT7,CEP250,CHPT1,CLK1,CNNM1,COG2,COPA,CPD,CSF2RB,CSNK1D,CTNNA1,CTSD,CTSZ,CX3CR1,DBF4,DDX10,DNAJA3,DOCK10,DUSP3,ECE1,EIF4G3,EMP3,EPHA4,ESYT3,ETFA,EVL,EXOSC7,FAM3A,FBXW7,FCGR2A,FGFR1,FHIT,FKBP1A,FOXO4,…	186 (45)	43
APLP2	other	26s Proteasome,ABL1,Akt,AKT1,APLP2,BHLHE40,CASP8,CCND1,CDKN1A,CDKN2A,CEBPA,CTNNB1,DAB1,DDX5,DNMT3A,E2F1,EIF2AK3,EIF4E,ERBB2,ERK1/2,FAS,FOXO3,GLI1,GSK3B,HIF1A,HNF4A,IGF1R,IGFBP3,IL6,JUN,KAT2B,MAPK8,MAPK9,mir-145,mir-23,MTOR,MYC,NANOG,NFkB (complex),NFKBIA,NOTCH1,NPM1,p70 S6k,PGR,PPARG,PPIF,PRKAA1,RB1,SMAD3,SP1,SRC,STAT3,STING1,TP53,TP73,TSC2	3	5.33e-11	7.26e-09	0.0002	ABCA9,ABCF3,ACADM,ACOT7,ACSF2,ADRA2A,AGGF1,AIMP2,AK1,AKR1B1,ANAPC4,ANG,APOBEC3B,Arf2,ARHGAP35,ARL6IP1,ARVCF,ASRGL1,ASTN1,ATG14,ATG4C,ATP1A1,B3GALT5,BSCL2,BUB1B,BUB3,CACNA1C,CAMK1D,CAND1,CAPRIN1,CARD11,CASP4,CASS4,CAV2,Ccl27a,CCNB2,CCT3,CHD1,CHD7,CLU,COG2,CSF1R,CSNK1D,CTSD,DBF4,DCAF6,DDX60,DFFA,DNAJA3,DONSON,DUSP6,DUSP7,ECE1,ECSIT,EEF2,EIF3G,EIF4G3,ELF2,EPHA1,ETFA,EXOSC7,FAIM2,FAM102A,FASTK,FBXW7,…	206 (56)	54
DACH1	transcription regulator	26s Proteasome,Akt,AKT1,ALDH1A1,AMPK,Ap1,AR,BCR-ABL1,BECN1,BRCA1,CCND1,CCNE1,CCR2,CDC25A,CEBPA,CHUK,Creb,CREB1,CSF2,CTNNB1,DACH1,EGFR,ERBB2,ERK1/2,ESR1,FOS,FOXO1,HIF1A,HOXA10,HRAS,IFNGR1,IGF1,IL2,IRF8,JAK2,JUN,LEPR,MAPK1,MAPK3,mir-21,MMP2,MYC,NCOA2,Nfat (family),NFkB (complex),NFKB1,Nr1h,NR3C1,NR4A1,PI3K (complex),Pka,PRKAA1,PRKCA,PTPN11,PTPN6,RAF1,Rar,RAS,RELA,RHOA,SMAD3,SOCS3,SOD2,SP1,SRC,SRC (…	3	5.52e-11	7.39e-09	0.0001	ABCA9,ABCC4,ABCF3,ACADM,ACOT7,ACTR1B,ADRA2A,AGAP2,AGGF1,AIMP2,AK1,APOB,ARHGAP33,ARHGAP35,ARSG,ASRGL1,ASTN1,ATG14,ATG4C,ATP1A1,ATP8A1,B3GAT2,B4GALT6,BSCL2,BUB1B,BUB3,CACNA1C,CARD11,CASP4,CATSPER2,CAV2,CBLB,CCR1,CCT3,CDK8,CDO1,CEP250,CHD7,CHPT1,CLK1,COG2,COPA,CSDE1,CSF2RB,CTSZ,DOCK10,DROSHA,DUSP3,DUSP6,DUSP7,E2F4,ECE1,ECSIT,EEF2,EIF3G,ELF2,EMP3,ESYT3,ETFA,ETS2,EVL,EXOSC7,FAM102A,FAM3A,FANCF,FBXO11,…	217 (76)	75
TWIST	group	26s Proteasome,ABL1,AKT1,BHLHE40,CASP8,CCND1,CDC25A,CDH1,CDKN1A,CDKN2A,CEBPA,DDX5,DNMT3A,E2F1,EIF2AK3,EIF4E,ERK1/2,ETS1,FAS,FOXO3,GLI1,HIF1A,HNF4A,ID2,IGFBP3,IL6,JUN,KAT2B,MAPK8,MAPK9,mir-145,mir-23,MTOR,MYC,MYOD1,NANOG,NFkB (complex),NFKBIA,NOTCH1,NPM1,p70 S6k,PGR,PPARG,PPIF,PRKAA1,PTTG1,RB1,SMAD3,SMURF1,SP1,SRC,STAT5a/b,STING1,STK11,TP53,TP73,TSC2,TWIST,TWIST1,TWIST2	3	6.12e-11	8.06e-09	0.0001	ABCA9,ABCF3,ACADM,ACOT7,ACOX1,ACSF2,ADRA2A,AGGF1,AK1,AKR1B1,ANAPC4,ANG,APOBEC3B,Arf2,ARHGAP35,ARL6IP1,ARVCF,ATG14,ATG4C,ATP1A1,B3GALT5,BSCL2,BUB1B,BUB3,CACNA1C,CAMK1D,CAND1,CAPRIN1,CARD11,CASP4,CASS4,CAV2,Ccl27a,CCNB2,CCT3,CDO1,COG2,CSF1R,CSNK1D,CTSD,DBF4,DCAF6,DDX60,DFFA,DNAJA3,DONSON,DUSP7,ECE1,ECSIT,EEF2,EIF3G,EIF4G3,EMP3,EPHA1,EPHA4,ETFA,ETS2,EXOSC7,FAIM2,FASTK,FBXW7,FCGR2A,FKBP1A,FOXO4,FYN,G…	194 (60)	59
ING1	transcription regulator	26s Proteasome,ABL1,Akt,AKT1,BHLHE40,Calcineurin protein(s),CASP3,CASP8,CCND1,CDKN1A,CDKN2A,CEBPA,CTNNB1,DDX5,DICER1,E2F1,EIF2AK3,EIF4E,ERBB2,ERK1/2,FAS,FOXO3,GLI1,HIF1A,HNF4A,IGF1R,IGFBP3,IL6,ING1,JUN,KAT2B,MAPK8,MAPK9,mir-145,mir-23,MLH1,MTOR,MYC,NANOG,NFkB (complex),NFKBIA,NOTCH1,NPM1,p70 S6k,PCNA,PGR,PI3K (complex),PPARG,PPIF,PRKAA1,PRKCD,PTEN,RB1,SMAD3,SP1,STAT3,STING1,TP53,TP73,TSC2	3	6.52e-11	8.45e-09	0.0002	ABCA9,ABCF3,ACADM,ACOT7,ACSF2,ADRA2A,AGGF1,AIMP2,AK1,AKR1B1,ANAPC4,ANG,APOBEC3B,Arf2,ARHGAP35,ARL6IP1,ARVCF,ASRGL1,ASTN1,ATG14,ATG4C,ATP1A1,B3GALT5,BSCL2,BUB1B,BUB3,CAMK1D,CAND1,CAPRIN1,CARD11,CASP4,CASS4,CAV2,CBLB,Ccl27a,CCNB2,CCT3,CHD1,CLU,COG2,CSF1R,CSNK1D,CTSD,DBF4,DCAF6,DDX60,DFFA,DIDO1,DNAJA3,DONSON,DUSP6,DUSP7,E2F4,ECE1,ECSIT,EEF2,EIF3G,EIF4G3,ELF2,EPHA1,ETFA,EXOSC7,FAIM2,FAM102A,FASTK,FBX…	211 (60)	59
HEY1	transcription regulator	26s Proteasome,ABL1,Akt,AKT1,BHLHE40,CASP8,CCND1,CDKN1A,CDKN2A,CEBPA,CTNNB1,DDX5,DNMT3A,E2F1,EIF2AK3,EIF4E,ERBB2,ERK1/2,FAS,FOXO3,GATA1,GLI1,HEY1,HIF1A,HNF4A,IGF1R,IGFBP3,IL6,JUN,KAT2B,MAPK8,MAPK9,mir-145,mir-23,MTOR,MYC,NANOG,NFkB (complex),NFKBIA,NOTCH1,NPM1,p70 S6k,PGR,PI3K (complex),PPARG,PPIF,PRKAA1,RB1,SMAD3,SP1,SPI1,STAT1,STAT3,STAT5a/b,STING1,TP53,TP73,TSC2	3	7.03e-11	8.97e-09	0.0004	ABCC4,ABCF3,ACADM,ACOT7,ACSF2,ADRA2A,AGGF1,AIMP2,AK1,AKR1B1,ANAPC4,ANG,APOBEC3B,Arf2,ARHGAP35,ARL6IP1,ARVCF,ASRGL1,ASTN1,ATG14,ATG4C,ATP1A1,B3GALT5,BSCL2,BUB1B,BUB3,CACNA1C,CAMK1D,CAND1,CAPRIN1,CARD11,CASP4,CASS4,CAV2,Ccl27a,CCNB2,CCT3,CHD7,CLU,COG2,CSF1R,CSNK1D,CTSD,DBF4,DCAF6,DDX60,DFFA,DNAJA3,DONSON,DUSP6,DUSP7,E2F4,ECE1,ECSIT,EEF2,EIF3G,EIF4G3,ELF2,EPHA1,EPHA4,ETFA,ETS2,EXOSC7,FAIM2,FAM102A,F…	212 (58)	57
COL1A1	other	Akt,AKT1,Calcineurin protein(s),CASP1,CASP3,CASP8,CASP9,CDC42,Cdc42,CDK6,CEBPB,COL1A1,Creb,CREB1,CXCL12,DICER1,EGFR,ERN1,ESR1,estrogen receptor,FMR1,FOXO4,GSK3B,HNF4A,HRAS,JINK1/2,MAPK14,MAPK3,MAPK9,MDM2,MMP14,MMP2,MTOR,NFAT5,NFE2L2,NFKBIA,PI3K (complex),PLCG2,PPARG,PRKCA,PRKCD,PTEN,RAC1,RAF1,RB1,RICTOR,RPS6KB1,RPTOR,RXRA,SMAD3,SRC,STAT1,STAT3,TARBP2,TCF7L2,Tgf beta,TGFB1,TP53,XBP1	3	7.32e-11	9.09e-09	0.0001	ABCA9,ABHD2,ACOT7,ACSF2,AGGF1,AIMP2,ANAPC4,ANG,ANXA7,APOB,APOBEC3B,ARAP2,ARHGAP33,ARHGAP35,ARID4A,ARL6IP1,ARPC4,ARSG,ARVCF,ATG14,ATG4C,ATP6V1G2,B3GALT5,BSCL2,BUB1B,BUB3,CAND1,CAPRIN1,CARD11,CASP4,CBLB,Ccl27a,CCT3,CCT7,CDO1,CEP250,CHD1,CHD7,CLK1,CNNM1,COG2,COPA,Cox6c,CPD,CSF2RB,CSNK1D,CTSZ,DAGLB,DCAF6,DDX60,DNAJA3,E2F4,EDEM2,EIF3G,EIF4G3,EIF4H,EMP3,ETFA,FAM102A,FCGR2A,FHIT,FOXO4,G6PC3,GALK2,GCNT2,…	184 (59)	55
HUWE1	transcription regulator	AR,EGFR,HUWE1,KRAS,MCL1,MYC,POLB,TP53	2	7.35e-11	9.09e-09	0.0001	ABCF3,ACOT7,ACSF2,AIMP2,AK1,AKR1B1,ANAPC4,ARL6IP1,ARVCF,ATG4C,ATP1A1,ATP8A1,B4GALT6,CACNA1C,CAND1,CARD11,CDO1,CHPT1,CLK1,CPD,CSDE1,CSF1R,CSNK1D,CTNNA1,DBF4,DDX60,DNAJA3,DROSHA,DUSP7,E2F4,ECSIT,EEF2,EIF3G,EIF4G3,ESYT3,ETFA,ETS2,EXOSC7,FAM3A,FBXW7,FGFR1,FKBP1A,FYN,GAS7,GOT2,GSDMD,GTF2I,Hmgn2 (includes others),HSP90AB1,HSPA9,IMPACT,INPP4A,IRF5,KCNJ3,KCNQ1OT1,KMT2D,MAG,MAP2K1,MAPK1,MCAT,MEF2C,MPHOSPH…	125 (8)	7
IFI16	transcription regulator	26s Proteasome,ABL1,AHR,AKT1,Alp,AR,BHLHE40,CASP1,CDKN1A,CDKN2A,CEBPB,Creb,CSF2,CTNNB1,DDX5,E2F1,EIF2AK3,EIF4E,ERBB2,estrogen receptor,FAS,FOXO3,GLI1,HNF4A,ID3,IFI16,IFNA1/IFNA13,IFNA2,IGF1R,IKBKB,IKK (complex),IRF3,IRF4,IRF7,JUN,KAT2B,MAPK9,mir-145,MTOR,MYC,MYOD1,NANOG,NCOR-LXR-Oxysterol-RXR-9 cis RA,NFkB (complex),NFKB2,NOS2,NPM1,NR1I2,p70 S6k,PGR,POU2F2,PPARG,PPIF,PRKAA1,PRL,Rb,RBL2,RELA,RUNX2…	3	7.47e-11	9.1e-09	0.0003	ABCF3,ACADM,ACOT7,ACOX1,ACSF2,ADRA2A,AGGF1,AK1,AKR1B1,ANAPC4,APOBEC3B,Arf2,ARHGAP35,ARL6IP1,ARVCF,ASRGL1,ASTN1,ATG14,ATG4C,ATP1A1,ATP8A1,B4GALT6,BUB1B,BUB3,CAMK1D,CAND1,CARD11,CASP4,CASS4,CAV2,CBLB,CCR1,CCT3,CHD7,CHPT1,CLTA,CLU,CNNM1,COG2,CSF1R,CSF2RB,CSNK1D,CTSD,DAXX,DBF4,DCAF6,DDX60,DFFA,DNAJA3,DONSON,DUSP6,DUSP7,ECSIT,EEF2,EIF3G,EIF4G3,ELF2,EPHA1,ESYT3,ETFA,ETS2,EXOSC7,FAIM2,FAM102A,FAM3A,FANC…	217 (70)	68
WDR5	transcription regulator	26s Proteasome,ABL1,Akt,AKT1,Alp,BHLHE40,CASP8,CBL,CCND1,CDKN1A,CDKN2A,CEBPA,Creb,CTNNB1,DDX5,E2F1,EIF2AK3,EIF4E,ERBB2,ERK1/2,FAS,FOXO3,GLI1,HIF1A,HNF4A,IGF1R,IL6,JUN,KAT2B,MAPK8,MAPK9,mir-145,mir-23,MTOR,MYC,NANOG,NFkB (complex),NFKBIA,NOTCH1,NPM1,p70 S6k,PGR,PI3K (complex),PPARG,PPIF,PRKAA1,PRL,RB1,SMAD3,SP1,STAT3,STING1,TP53,TP73,TSC2,WDR5	3	7.68e-11	9.21e-09	0.0006	ABCF3,ACADM,ACOT7,ACSF2,ADRA2A,AGGF1,AIMP2,AK1,AKR1B1,ANAPC4,ANG,APOBEC3B,Arf2,ARHGAP35,ARL6IP1,ARVCF,ASRGL1,ASTN1,ATG14,ATG4C,ATP1A1,B3GALT5,BSCL2,BUB1B,BUB3,CAMK1D,CAND1,CAPRIN1,CARD11,CASP4,CASS4,CAV2,Ccl27a,CCNB2,CCT3,CHD7,CLU,COG2,CSF1R,CSNK1D,CTSD,DBF4,DCAF6,DDX60,DFFA,DNAJA3,DONSON,DUSP6,DUSP7,E2F4,ECE1,ECSIT,EEF2,EIF3G,EIF4G3,ELF2,EPHA1,EPHA4,ETFA,EXOSC7,FAIM2,FAM102A,FASTK,FBXW7,FCGR2A,F…	210 (56)	55
lovastatin	chemical drug	26s Proteasome,Akt,AR,CASP8,EGFR,ERK,ERK1/2,HRAS,lovastatin,MAPK1,MYC,NFkB (complex),NOS2,Nr1h,NR1I2,PTPN11,RB1,RHOA,Rxr,SREBF2,STAT4,STAT6,TP53,TYK2	2	7.8e-11	9.22e-09	0.0002	ABCC4,ABCF3,ACOT7,ACOX1,ACSF2,ADRA2A,AIMP2,AK1,AKR1B1,ANAPC4,ANG,ARL6IP1,ARVCF,ATG4C,ATP8A1,B4GALT6,CAMK1D,CAND1,CARD11,CAV2,Ccl27a,CCR1,CCT3,CDO1,CEP250,CHPT1,CLK1,CSDE1,CSF1R,CSNK1D,CTNNA1,DAXX,DBF4,DDX60,DNAJA3,DROSHA,DUSP7,E2F4,ECSIT,EEF2,EIF3G,EIF4G3,ESYT3,ETFA,ETS2,EXOSC7,FAM3A,FBXW7,FCGR2A,FGFR1,FHIT,FKBP1A,FYCO1,FYN,GALK2,GAS7,GBP5,GCNT2,GOT2,GTF2I,HEXB,HLA-DMB,HLA-DOB,Hmgn2 (includes oth…	155 (24)	24
TRRAP	transcription regulator	APP,AR,ATF4,BRCA1,CASP8,CCND1,CDC20,Cdk,CDK1,CDK4/6,CDKN1A,CDKN2A,CREB1,CTNNB1,ERK1/2,F2,FOS,FOXO1,GLI1,GSK3B,HMGA1,ING1,JUN,KAT5,MASTL,MCL1,MDM2,MMP9,MYC,MYOD1,NFKBIA,NPM1,PTEN,PTTG1,RB1,RBL2,RELA,SOX2,SP1,SRC,STAT3,Tgf beta,TP53,TP73,TRRAP,TSC1,YAP1	3	8.45e-11	9.65e-09	0.0004	ABCA9,ABCC4,ABCF3,ABHD2,ACADM,ACSF2,AGGF1,AIMP2,AK1,AKR1B1,ALDH1L2,ANAPC4,APOB,APOBEC3B,ARHGAP33,ARHGAP35,ARID4A,ARL2BP,ARL6IP1,ASRGL1,ATG14,ATP8A1,B4GALT6,BSCL2,BUB1B,CAND1,CARD11,CASS4,Ccl27a,CCNB2,CCT3,CDO1,CHPT1,CLU,CPD,CSDE1,CSF1R,CSF2RB,CSNK1D,CTNNA1,CTSD,CTSZ,CX3CR1,DAXX,DBF4,DCAF6,DDX60,DIDO1,DNAJA3,DOCK10,DONSON,DROSHA,DUSP3,DUSP6,DUSP7,ECE1,ECSIT,EEF2,EIF3G,EIF4G3,ESYT3,ETFA,EVL,EXOSC7,…	201 (47)	45
5,5'-dithiobis(2-nitrobenzoic acid)	chemical reagent	5,5'-dithiobis(2-nitrobenzoic acid),AHR,Akt,AKT1,Ap1,CASP8,CBL,CXCL12,EGFR,ERK,IGF1R,ITGA2B,ITGB3,MAP3K14,MMP1,MTOR,NFkB (complex),PI3K (complex),Pkc(s),PLCG2,PTK2,REL,SRC,STAT1,STAT6,SYK,Tgf beta,TP53	3	8.47e-11	9.65e-09	0.0001	ABCA9,ABCC4,ACOT7,ACOX1,ACSF2,ADRA2A,AIMP2,AK1,ANAPC4,APOBEC3B,ARID4A,ARL6IP1,ARPC4,ARVCF,ATG4C,ATP1A1,ATP8A1,BSCL2,BUB1B,CAMK1D,CAND1,CAV2,Ccl27a,CCR1,CDO1,CLK1,CPD,CSNK1D,CX3CR1,DAGLB,DAXX,DBF4,DDX60,DNAJA3,DOCK10,DUSP6,E2F4,EIF4G3,EPHA4,FBXW7,FCGR2A,FHIT,FKBP1A,FYCO1,GALK2,GAS7,GBP5,GCNT2,GOT2,HADHB,HLA-DMB,HLA-DRB5,Hmgn2 (includes others),HSPA9,INPP4A,IRF5,ITGA5,JARID2,JMY,KMT2D,L1CAM,LMBRD1,…	132 (28)	26
MELK-8a	chemical drug	Akt,AKT1,APP,AR,AURKA,AURKB,BRCA1,CDC20,CDC25A,CDK1,CDKN1B,EIF4B,ERK1/2,EZH2,FADD,FOS,FOXM1,FOXO1,FOXO3,HMGA1,ING1,JUN,KAT5,MAPK14,MASTL,MCL1,MDM2,MELK,MELK-8a,MTOR,MYC,MYOD1,NFKBIA,NPM1,p70 S6k,PAX8,PKM,PTTG1,RACGAP1,RB1,RPS6KB1,SOX2,SRC,SRC (family),TP53,TP73,TSC1,YAP1	3	8.53e-11	9.65e-09	0.0003	ABCA9,ABCC4,ABCF3,ACOX1,ACSF2,AGGF1,AIMP2,AK1,AKR1B1,ALDH1L2,ANAPC4,ANG,APOB,ARL2BP,ATG14,ATP8A1,B4GALT6,CAMK1D,CAND1,CARD11,CASS4,CCR1,CCT3,CDO1,CHPT1,CSDE1,CSF2RB,CSNK1D,CTNNA1,CTSZ,DAXX,DBF4,DCAF6,DDX60,DIDO1,DNAJA3,DOCK10,DROSHA,DUSP3,DUSP7,ECE1,EEF2,EIF3G,EIF4G3,ESYT3,ETFA,EVL,EXOSC7,FAM3A,FCGR2A,FHIT,FKBP1A,FYN,GADD45G,GALNT1,GAS7,GCNT2,GOLGA7,GOT2,GPR137B,GTF2I,HEXB,HSP90AB1,HSPA9,IMPACT,J…	166 (48)	43
CCDC6	other	Akt,AKT1,AR,CASP8,CCDC6,CCNE1,Cdc42,CDKN1A,CREB1,CTNNB1,EGFR,EIF4E,ELK1,ERK,ERK1/2,estrogen receptor,FOXO1,HIF1A,HRAS,IGF1R,IKK (complex),MAP2K1/2,MAPK1,MAPK14,MAPK3,MMP2,MTOR,MTORC1,NFkB (complex),NFKB1,p70 S6k,PEA15,PI3K (complex),PI3K (family),PIK3R1,PTEN,PTK2,PTPN6,RB1,RELA,RPTOR,SMAD2,SMAD3,SP1,STAT1,STAT3,STAT5a/b,STAT6,STK3,TP53,TSC2	3	8.85e-11	9.88e-09	0.0003	ABCA9,ABCC4,ABHD2,ACADM,ACOT7,ACOX1,ACSF2,ADRA2A,AIMP2,AK1,ANAPC4,APOB,APOBEC3B,ARHGAP33,ARHGAP35,ARL6IP1,ARVCF,ASRGL1,ATG14,ATG4C,ATP1A1,ATP8A1,B4GALT6,BSCL2,CACNA1C,CAMK1D,CAND1,CARD11,Ccl27a,CCNB2,CCR1,CCT3,CDO1,CEP250,CHD1,CHPT1,CLK1,CNNM1,CPD,CSF2RB,CSNK1D,CTNNA1,CTSZ,DAXX,DBF4,DDX60,DNAJA3,DOCK10,DROSHA,E2F4,ECE1,EEF2,EIF4G3,EMP3,EPHA4,ESYT3,ETS2,FAM102A,FAM3A,FANCF,FASTK,FBXW7,FCGR2A,FGFR1…	180 (51)	50
warfarin	chemical drug	Akt,AKT1,Alp,AR,AXL,CASP8,CBL,CDC25A,CEBPA,CHUK,CTNNB1,CYP2C8,EGFR,ERK,ERK1/2,FOS,FOXO1,GAS6,GSK3B,JUN,MAP2K1/2,MAPK1,MAPK8,MERTK,mir-21,MMP2,MYC,NFkB (complex),NFKBIA,Osteocalcin,paclitaxel,PI3K (complex),PIK3R1,PKM,PRL,PTPN11,RALA,RHOA,SOD2,SRC,SRC (family),STAT3,STAT5a/b,TLR3,TP63,TP73,TWIST,warfarin,YAP1	3	9.37e-11	1.03e-08	0.0001	ABCA9,ABCC4,ABCF3,ACADM,ACOT7,ACOX1,ACSF2,ADRA2A,AGGF1,AIMP2,AKR1B1,APOB,ARVCF,ASRGL1,ATG14,ATP1A1,ATP8A1,B3GALT5,B4GALT6,BUB1B,CASP4,CASS4,CAV2,Ccl27a,CCR1,CCT3,CDO1,CEP250,CHD1,CHPT1,CLK1,CSDE1,CSF2RB,CTSZ,DCAF6,DOCK10,DROSHA,DUSP7,ECE1,ECSIT,EEF2,EIF3G,EPHA4,ESYT3,ETS2,EXOSC7,FAM102A,FAM3A,FBXO11,FCGR2A,FGFR1,FHIT,FLT1,FOXO4,FYN,FZD5,GABPB1,GADD45G,GALNT1,GBP5,GCNT2,GPR137B,GPSM1,HADHB,HELZ2,H…	164 (49)	43
miR-221-3p (and other miRNAs w/seed GCUACAU)	mature microRNA	Akt,AKT1,AR,BBC3,CASP8,CCNE1,Cdc42,CDKN1A,CREB1,CTNNB1,EGFR,EIF4E,ELK1,ERK1/2,ERN1,estrogen receptor,FOXO1,HIF1A,HRAS,IGF1R,IKK (complex),MAP2K1/2,MAPK1,MAPK3,miR-221-3p (and other miRNAs w/seed GCUACAU),MMP2,MTOR,MTORC1,NFkB (complex),NFKB1,p70 S6k,PEA15,PI3K (complex),PI3K (family),PIK3R1,PTEN,PTK2,PTPN6,RB1,RELA,RPTOR,SMAD2,SMAD3,SP1,STAT1,STAT3,STAT5a/b,STAT6,STK3,TP53,TSC2,XBP1	3	9.71e-11	1.05e-08	0.0003	ABCA9,ABCC4,ABHD2,ACADM,ACOT7,ACOX1,ACSF2,ADRA2A,AIMP2,AK1,ANAPC4,ANG,APOB,APOBEC3B,ARHGAP33,ARHGAP35,ARL6IP1,ARVCF,ASRGL1,ATG14,ATG4C,ATP8A1,B4GALT6,BSCL2,CAND1,CARD11,Ccl27a,CCNB2,CCR1,CCT3,CDO1,CEP250,CHD1,CHPT1,CLK1,CNNM1,CPD,CSF2RB,CSNK1D,CTNNA1,CTSZ,DAXX,DBF4,DDX60,DNAJA3,DOCK10,DROSHA,E2F4,ECE1,EDEM2,EEF2,EIF4G3,EMP3,EPHA4,ESYT3,ETS2,FAM102A,FAM3A,FANCF,FASTK,FBXW7,FCGR2A,FGFR1,FHIT,FKBP1A…	180 (52)	52
trichosanthin	chemical drug	26s Proteasome,ABL1,AKT1,BAX,BHLHE40,CASP8,CCND1,CCR2,CCR3,CCR5,CDKN1A,CDKN2A,CEBPA,CFTR,CTNNB1,CXCR4,DDX5,E2F1,EGF,EGFR,EIF2AK3,EIF4E,ERBB2,FAS,FOXO3,G protein,G protein alpha,GLI1,GNA12,GNAI2,GNAQ,HNF4A,IGF1R,IGFBP3,INSR,IRF3,KAT2B,MAPK8,MAPK9,MCL1,mir-145,mir-23,MMP14,MTOR,MYC,NANOG,NFKBIA,NOTCH1,NPM1,OMA1,p70 S6k,PDK1,PGR,PPIF,PRKAA1,PTEN,RB1,SMAD3,SP1,SPI1,STAT5B,TGFB1,TP53,TP73,trichosanthi…	3	9.84e-11	1.05e-08	0.0002	ABCA9,ABCF3,ACADM,ACOT7,ACSF2,AGGF1,AK1,AKR1B1,ALDH1L2,ANAPC4,ANXA7,Arf2,ARHGAP35,ARL6IP1,ARVCF,ASRGL1,ASTN1,ATG4C,ATP1A1,B3GALT5,B3GAT2,BSCL2,BUB1B,BUB3,CAMK1D,CAND1,CARD11,CASP4,CASS4,CAV2,Ccl27a,CCNB2,CCR1,CCT3,CDO1,CHD1,CHD7,CLK1,CLU,COG2,CSF1R,CSNK1D,CTSD,DBF4,DCAF6,DFFA,DNAJA3,DOLK,DONSON,DUSP6,DUSP7,ECSIT,EEF2,EIF3G,EIF4G3,EIF4H,ELF2,EPHA1,ETFA,EXOSC7,FAIM2,FASTK,FBXW7,FKBP1A,FOXO4,FYN,FZD…	207 (67)	62
ZMIZ1	transcription regulator	Akt,AKT1,AR,ATF4,BRCA1,CASP8,CCL2,CCND1,CDK4/6,CDKN1A,CDKN1B,CDKN2A,Creb,CREB1,CTNNB1,EGFR,ERBB2,ERK1/2,ESR1,F2,FOXO1,GLI1,GSK3B,HIF1A,HNF4A,IRF7,MAPK1,MAPK14,MDM2,MTOR,MYC,NCOA2,NCOA4,NFkB (complex),NFKBIA,Nr1h,NR4A1,PPARGC1A,PTEN,RB1,SMAD3,SP1,SRC,SREBF2,STAT3,STK11,TGFB1,TGM2,TP73,ZMIZ1	3	1.01e-10	1.06e-08	0.0005	ABCA9,ABCC4,ABCF3,ACADM,ACOT7,AGGF1,AIMP2,AKR1B1,APOBEC3B,ARHGAP33,ARL6IP1,ARSG,ARVCF,ASRGL1,ASTN1,ATG14,ATG4C,ATP8A1,B3GALT5,B4GALT6,BSCL2,BUB1B,BUB3,CACNA1C,CAPRIN1,CASS4,CAV2,Ccl27a,CCNB2,CCT3,CDO1,CEP250,CHD7,CHPT1,CLK1,CLU,COG2,COPA,CPD,CSDE1,CSF1R,CTNNA1,CTSD,DAXX,DCAF6,DDX60,DOCK10,DONSON,DROSHA,DUSP3,DUSP6,DUSP7,ECSIT,EEF2,EIF3G,EIF4H,ELF2,EMP3,ESYT3,ETS2,EXOSC7,FAM102A,FAM3A,FARSB,FBXW7,…	218 (50)	49
pidnarulex	chemical drug	26s Proteasome,ABL1,Akt,AKT1,ATR,BHLHE40,CASP8,CCND1,CDKN2A,CEBPA,CHEK1,CHEK2,CREB1,CTNNB1,DDX5,E2F3,EGFR,EIF2AK3,EIF4E,ERBB2,FAS,FOXO3,GLI1,GSK3B,HIF1A,HNF4A,IFNA1/IFNA13,IFNA2,IFNE,IGF1R,IGFBP3,IL6,ING1,IRF3,IRF7,JUN,KAT2B,MAPK8,MAPK9,mir-145,mir-23,MTOR,MYC,NANOG,NCOR-LXR-Oxysterol-RXR-9 cis RA,NFKBIA,NOTCH1,p70 S6k,PGR,pidnarulex,PPARG,PPIF,PRKAA1,SMAD3,SP1,SRC,TP53,TP73,TRIM28,TSC2,YAP1	3	1.02e-10	1.06e-08	0.0002	ABCA9,ABCF3,ACADM,ACOT7,ACSF2,AGGF1,AIMP2,AK1,AKR1B1,ANAPC4,APOBEC3B,Arf2,ARHGAP33,ARL6IP1,ARVCF,ASRGL1,ASTN1,ATG4C,ATP1A1,B3GALT5,BSCL2,CAND1,CAPRIN1,CARD11,CASP4,CASS4,CAV2,Ccl27a,CCNB2,CCT3,CHD1,CHD7,CLK1,CLU,COG2,CSF1R,CSNK1D,CTSD,DAXX,DBF4,DCAF6,DDX60,DFFA,DIDO1,DNAJA3,DONSON,DUSP6,DUSP7,ECSIT,EEF2,EIF3G,EIF4G3,ELF2,EPHA1,ETFA,EXOSC7,FAIM2,FASTK,FBXW7,FCGR2A,FKBP1A,FOXO4,FYN,FZD5,G6PC3,GAB3,…	205 (61)	58
HOXA2	transcription regulator	26s Proteasome,ABL1,Akt,AKT1,AR,BHLHE40,CASP8,CCND1,CDKN1A,CDKN1B,CDKN2A,CEBPA,CTNNB1,DDX5,E2F1,EIF2AK3,EIF4E,ERBB2,ERK1/2,FAS,FOXO3,GLI1,HIF1A,HNF4A,HOXA2,IGF1R,IGFBP3,IL6,JUN,KAT2B,MAPK8,MAPK9,mir-145,mir-23,MTOR,MYC,NANOG,NFkB (complex),NFKBIA,NOTCH1,NPM1,p70 S6k,PGR,PI3K (complex),PPARG,PPIF,PRKAA1,RB1,RCHY1,SMAD3,SP1,STAT3,STING1,TP53,TP73,TSC2	3	1.04e-10	1.07e-08	0.0003	ABCF3,ACADM,ACOT7,ACSF2,ADRA2A,AGGF1,AIMP2,AK1,AKR1B1,ANAPC4,ANG,APOBEC3B,Arf2,ARHGAP35,ARL6IP1,ARVCF,ASRGL1,ASTN1,ATG14,ATG4C,ATP1A1,ATP8A1,B3GALT5,B4GALT6,BSCL2,BUB1B,BUB3,CAMK1D,CAND1,CAPRIN1,CARD11,CASP4,CASS4,CAV2,Ccl27a,CCNB2,CCT3,CDO1,CHD7,CHPT1,CLU,COG2,CSF1R,CSNK1D,CTSD,DBF4,DCAF6,DDX60,DFFA,DNAJA3,DONSON,DUSP6,DUSP7,E2F4,ECE1,ECSIT,EEF2,EIF3G,EIF4G3,ELF2,EPHA1,ESYT3,ETFA,ETS2,EXOSC7,FAI…	212 (56)	54
APH-1	group	Akt,AKT1,APH-1,APH1A,APH1B,CASP3,HES1,MDM2,NCSTN,Notch,NOTCH1,PSEN1,PSEN2,Secretase gamma,TP53,TREM2	3	1.11e-10	1.11e-08	0.0001	2700097O09Rik,ACADM,ACSF2,AIMP2,AK1,AKR1B1,ANAPC4,APOB,ARL6IP1,ARVCF,ATG4C,ATP1A1,BUB1B,CAND1,CARD11,CASP4,CAV2,CCNB2,CPD,CSF1R,CSF2RB,CSNK1D,CTSZ,CX3CR1,DBF4,DNAJA3,DUSP6,E2F4,EIF4G3,ETFA,FBXW7,FCGR2A,FHIT,FKBP1A,FLT1,FYN,GADD45G,GAS7,GCNT2,GOT2,HADHB,Hmgn2 (includes others),HSP90AB1,IMPACT,INPP4A,IRF5,KDM6B,KMT2D,L1CAM,LMBRD1,LYVE1,MAPK1,MCAT,MGAT5,MSR1,MTHFD2,MYB,MYO6,NDUFS6,NEU1,NHSL2,NRP2,NU…	102 (16)	14
cobalt	chemical toxicant	26s Proteasome,ABL1,AHR,AKT1,APLN,BHLHE40,CCND1,CDKN2A,CEBPA,cobalt,Creb,DDX5,E2F1,EIF2AK3,EIF4E,ERBB2,FAS,FOXO3,FOXP3,GLI1,Hif1,HIF1A,HNF4A,IGF1R,IL1B,IL6,KAT2B,MAPK1,mir-145,MTOR,MYC,NFkB (complex),NFKBIA,NOTCH1,NPM1,PDE3A,PGR,PPARG,PPIF,PRKAA1,PTEN,RAF1,RB1,SMAD3,SP1,TNF,TP53,TP73,TSC2,Vegf,VEGFA	3	1.14e-10	1.11e-08	0.0007	ABCA9,ABCF3,ACADM,ACSF2,ADRA2A,AGGF1,AK1,AKR1B1,ANAPC4,ANG,Arf2,ARHGAP35,ARL6IP1,ARVCF,ASTN1,ATG14,ATG4C,ATP1A1,B3GALT5,BSCL2,BUB1B,BUB3,CAMK1D,CAND1,CAPRIN1,CARD11,CASP4,CASS4,CAV2,CCNB2,CCT3,CDO1,CHD1,CHD7,CLK1,CLU,COG2,CSF1R,CSNK1D,CTSD,DBF4,DCAF6,DFFA,DNAJA3,DOCK10,DONSON,DUSP6,DUSP7,ECE1,ECSIT,EIF3G,EIF4G3,ELF2,EPHA1,EPHA4,ETFA,ETS2,EVA1B,EXOSC7,FAIM2,FASTK,FBXW7,FCGR2A,FKBP1A,FLT1,FYN,G6PC3…	211 (51)	48
TRIM28	transcription regulator	E2F1,E2F3,MYC,RB1,RELA,STAT3,TP53,TRIM28	2	1.15e-10	1.11e-08	0.0001	ABCC4,ABCF3,ACSF2,AIMP2,AK1,AKR1B1,ANAPC4,ARL6IP1,ARVCF,ATG14,ATG4C,ATP1A1,BUB3,CAND1,CARD11,CASP4,CAV2,CCR1,CCT3,CPD,CSDE1,CSF1R,CSNK1D,CTNNA1,DBF4,DDX60,DNAJA3,DROSHA,DUSP7,E2F4,ECE1,ECSIT,EEF2,EIF3G,EIF4G3,ETFA,EXOSC7,FAM102A,FBXW7,FHIT,FKBP1A,FLT1,FYN,GADD45G,GAS7,GBP5,GOT2,HLA-DRB5,HMBS,Hmgn2 (includes others),HSP90AB1,HSPA9,IMPACT,INPP4A,ITGA5,JMY,KCNQ1OT1,KMT2D,LIG3,MAG,MALAT1,MEF2C,MGAT5,…	123 (8)	8
ELL	transcription regulator	26s Proteasome,ABL1,AKT1,Ap1,BHLHE40,Calcineurin protein(s),CASP3,CCND1,CDKN1A,CDKN2A,CEBPA,Creb,CSF2,CTNNB1,DDX5,DICER1,DNMT3A,E2F1,EIF2AK3,EIF4E,ELL,ERBB2,ERK1/2,FAS,FOS,FOXO3,GLI1,HIF1A,HNF4A,IGF1,IGF1R,IGFBP3,IL2,IL6,JUN,KAT2B,MAPK8,MAPK9,mir-145,mir-23,MTOR,MYC,NANOG,Nfat (family),NFkB (complex),NFKBIA,NOTCH1,NPM1,NR3C2,p70 S6k,PGR,PPARG,PPIF,PRKAA1,PTEN,RB1,SMAD3,SP1,STAT3,STING1,TP53,TP73,…	3	1.16e-10	1.11e-08	0.0006	ABCA9,ABCF3,ACADM,ACOT7,ACSF2,ACTR1B,ADRA2A,AGAP2,AGGF1,AK1,AKR1B1,ANAPC4,ANG,APOBEC3B,Arf2,ARHGAP35,ARL6IP1,ARVCF,ASRGL1,ASTN1,ATG14,ATG4C,ATP1A1,B3GALT5,BSCL2,BUB1B,BUB3,CACNA1C,CAMK1D,CAND1,CAPRIN1,CARD11,CASS4,CATSPER2,CAV2,CBLB,CCNB2,CCT3,CHD1,CHD7,CLU,COG2,CSF1R,CSNK1D,CTSD,DBF4,DCAF6,DDX60,DFFA,DNAJA3,DOCK10,DONSON,DUSP7,ECE1,ECSIT,EEF2,EIF3G,EIF4G3,ELF2,EPHA1,EPHA4,ETFA,EVL,EXOSC7,FAIM2,F…	215 (63)	61
SMYD2	enzyme	26s Proteasome,ABL1,AKT1,BHLHE40,CASP8,CCND1,CDKN1A,CDKN2A,CEBPA,CTNNB1,DDX5,DNMT3A,E2F1,EIF2AK3,EIF4E,ERBB2,ERK1/2,FAS,FOXO3,GLI1,HIF1A,HNF4A,IGF1R,IGFBP3,IKBKB,IKK (complex),IL6,IRF3,IRF7,KAT2B,MAP4K4,MAVS,mir-145,mir-23,MTOR,MYC,NANOG,NFKBIA,NOTCH1,NPM1,p70 S6k,PGR,PPARG,PPIF,PRKAA1,RB1,RIPK1,SMAD3,SMYD2,SP1,STAT3,TP53,TP73,TSC2	3	1.16e-10	1.11e-08	0.0002	ABCF3,ACADM,ACOT7,ACSF2,AGGF1,AK1,AKR1B1,ANAPC4,ANG,Arf2,ARHGAP35,ARL6IP1,ARVCF,ASRGL1,ASTN1,ATG14,ATG4C,ATP1A1,B3GALT5,BSCL2,BUB1B,BUB3,CACNA1C,CAMK1D,CAND1,CAPRIN1,CARD11,CASP4,CASS4,CAV2,CBLB,Ccl27a,CCNB2,CCT3,CHD7,CHPT1,CLU,COG2,CSF1R,CSNK1D,CTSD,DBF4,DCAF6,DFFA,DNAJA3,DONSON,DUSP6,DUSP7,ECE1,ECSIT,EEF2,EIF3G,EIF4G3,ELF2,EPHA1,ETFA,EXOSC7,FAIM2,FAM102A,FANCF,FASTK,FBXW7,FCGR2A,FKBP1A,FYN,FZD5…	200 (54)	52
KAT5	transcription regulator	EOMES,KAT5,MAPK8,MAPK9,MYC,RELA,TP53,TP63	2	1.17e-10	1.11e-08	0.0001	ABCC4,ABCF3,ACSF2,AIMP2,AK1,AKR1B1,ALDH1L2,ANAPC4,APOBEC3B,ARL6IP1,ARVCF,ATG4C,ATP1A1,CAND1,CARD11,CASP4,CAV2,CCR1,CCT3,CPD,CSDE1,CSF1R,CSNK1D,CTNNA1,DBF4,DDX60,DNAJA3,DROSHA,DUSP7,ECSIT,EEF2,EIF3G,EIF4G3,ETFA,EXOSC7,FBXW7,FGFR1,FKBP1A,FOXO4,FYN,FZD5,GADD45G,GAS7,GOT2,Hmgn2 (includes others),HSP90AB1,HSPA9,IFT22,IMPACT,INPP4A,IRF5,KCNQ1OT1,KMT2D,LIG3,MAG,MAPK1,MCAT,MPHOSPH6,MRPL20,MSR1,MTHFD2,MYO…	128 (8)	8
FBXL14	enzyme	Akt,ATF4,BMI1,BRCA1,CASP8,CCND1,CDK4/6,CDKN1A,CDKN1B,CDKN2A,CREB1,CTNNB1,F2,FBXL14,GLI1,GSK3B,KAT2B,MAPK14,MDM2,mir-22,MYC,MYOD1,NFKBIA,NOTCH1,PTEN,RB1,RBL2,RELA,SNAI1,STAT3,TAFAZZIN,Tgf beta,TP53,TP73,TWIST1,YAP1	3	1.18e-10	1.11e-08	0.0002	ABCA9,ABCC4,ABCF3,ACADM,ACOX1,ACSF2,AGGF1,AIMP2,ANAPC4,ANG,APOB,APOBEC3B,ARHGAP33,ARHGAP35,ARID4A,ARL6IP1,ARVCF,ASRGL1,ATG4C,B3GALT5,BSCL2,BUB1B,CACNA1C,CAMK1D,CAND1,CARD11,CASS4,CAV2,Ccl27a,CCNB2,CCT3,CDO1,CPD,CSDE1,CSF1R,CSF2RB,CSNK1D,CTNNA1,CTSD,CTSZ,CX3CR1,DBF4,DCAF6,DDX60,DIDO1,DNAJA3,DOCK10,DONSON,DROSHA,DUSP3,DUSP6,DUSP7,ECE1,ECSIT,EEF2,EIF3G,EIF4G3,EMP3,ETFA,ETS2,EXOSC7,FAM102A,FBXW7,FCGR…	184 (36)	34
selpercatinib	chemical drug	AKT1,ATF4,Creb,EGFR,EIF4E,ELK1,ERBB2,ERBB3,ERK1/2,ESR1,estrogen receptor,FGF2,FGFR1,FGFR2,FGFR3,FLT1,FLT4,HRAS,HSF1,JUN,KIF5B-RET,MAPK8,MMP2,MTOR,MYC,NFATC2,NFE2L2,NFkB (family),NGEF,nitric oxide,PI3K (complex),PRKCD,RAS,RB1,RET,selpercatinib,SRC,SRC (family),STAT1,STAT3,STAT5B,TFRC,Vegf,YAP1	3	1.21e-10	1.12e-08	0.0003	ABCA9,ABCC4,ABCF3,ABHD2,ACADM,ACOT7,ACOX1,ACSF2,ADRA2A,AGGF1,AK1,ANG,APOBEC3B,ARSG,ATP1A1,BUB1B,BUB3,CAMK1D,CAV2,CCDC15,CCNB2,CCT7,CDO1,CEP250,CHD7,CLK1,CLU,CNNM1,COG2,COPA,CSDE1,CSF2RB,CTNNA1,CTSZ,DAXX,DBF4,DDX60,DROSHA,DUSP6,DUSP7,ECE1,ECSIT,EEF2,EIF3G,ELF2,EMP3,EPHA4,ETFA,ETS2,EXOSC7,FAIM2,FAM102A,FASTK,FBXW7,FOXO4,FYN,GAB3,GALNT1,GIMAP1,GNA11,GOT2,GSDMD,GTDC1,HADHB,HELZ2,HEXB,HJURP,HLA-DRB5,H…	173 (44)	41
RUNX1-RUNX1T1	fusion gene/product	CBFB,CEBPA,FOXO3,GATA1,JUN,MAPK14,MAPK8,MYC,PPARG,PTPN11,RUNX1,RUNX1-RUNX1T1,SPI1,SREBF1,STAT3,TP53,VitaminD3-VDR-RXR	3	1.22e-10	1.12e-08	0.0001	ABCC4,ABCF3,ACOX1,ACSF2,AGGF1,AIMP2,AK1,AKR1B1,ANAPC4,APOB,ARVCF,ATG4C,ATP1A1,BUB1B,CAMK1D,CAND1,CARD11,CAV2,CCNB2,CCR1,CCT3,CEP250,CLU,CPD,CSDE1,CSF1R,CSNK1D,CTNNA1,CTSD,DBF4,DDX60,DNAJA3,DUSP7,ECSIT,EEF2,EIF3G,EIF4G3,ETFA,ETS2,EXOSC7,FAM102A,FBXW7,FCGR2A,FGFR1,FKBP1A,FLT1,FOXO4,GABPB1,GADD45G,GALNT1,GAS7,GBP5,GOT2,GTF2I,HADHB,HELZ2,HLA-DRB5,HMBS,HSP90AB1,IMPACT,INPP4A,IRF5,ITGA5,KCNQ1OT1,KLHL24…	140 (17)	17
CSF2 receptor	complex	AKT1,ATF4,BCR-ABL1,BECN1,BRCA1,CASP8,CCND1,CCR2,CDK4/6,CDKN1A,CDKN2A,CREB1,CSF2 receptor,CSF2RA,CSF2RB,CTNNB1,EGFR,EIF4E,ERBB2,ERK1/2,F2,GLI1,GSK3B,HMGCR,HOXA10,HRAS,IFNGR1,IL10RA,IL4R,IRF8,JAK1,JAK2,LEPR,MAPK14,MDM2,mir-22,MKNK1,MYC,NFkB (complex),NFKBIA,PI3K (complex),PRKCA,PTEN,PTK2,PTPN11,PTPN6,RACK1,RAF1,RALA,RAS,RB1,RHOA,SIRT1,STAT1,STAT3,STAT4,STAT5a/b,STAT5B,STAT6,SYK,Tgf beta,TP73,TYK2,Y…	3	1.27e-10	1.15e-08	0.0002	ABCA9,ABCC4,ABCF3,ACADM,ACOT7,ACSF2,ADRA2A,AGGF1,AIMP2,AK1,AKR1B1,ANG,ARHGAP33,ARHGAP35,ARID4A,ARL6IP1,ASRGL1,ATG14,ATG4C,ATP8A1,B3GALT5,B3GAT2,BSCL2,BUB1B,CASS4,CAV2,Ccl27a,CCNB2,CCT3,CDK8,CDO1,CEP250,CHD7,CLK1,CLU,CPD,CSDE1,CSF1R,CSF2RB,CTNNA1,CTSD,CTTNBP2,DAXX,DCAF6,DDHD1,DDX60,DONSON,DROSHA,DUSP3,DUSP6,DUSP7,ECE1,ECSIT,EEF2,EIF3G,ELF2,EMP3,ETS2,EXOSC7,FAM102A,FANCF,FASTK,FBXW7,FCGR2A,FGFR1,FO…	191 (64)	59
PAXIP1	other	26s Proteasome,ABL1,Akt,AKT1,BHLHE40,CASP8,CCND1,CDKN1A,CDKN2A,CEBPA,CTNNB1,DDX5,DNMT3A,E2F1,EIF2AK3,EIF4E,ERBB2,ERK1/2,FAS,FOXO3,GLI1,HIF1A,HNF4A,IGF1R,IGFBP3,IL6,JUN,KAT2B,MAPK8,MAPK9,mir-145,mir-23,MTOR,MYC,NANOG,NFkB (complex),NFKBIA,NOTCH1,NPM1,p70 S6k,PAXIP1,PGR,PI3K (complex),PPIF,PRKAA1,PTPN11,RB1,SMAD3,SP1,STING1,TP53,TP73,TSC2,VitaminD3-VDR-RXR	3	1.27e-10	1.15e-08	0.0003	ABCF3,ACADM,ACOT7,ACSF2,ADRA2A,AGGF1,AIMP2,AK1,ANAPC4,ANG,APOB,APOBEC3B,Arf2,ARHGAP35,ARL6IP1,ARVCF,ASRGL1,ASTN1,ATG14,ATG4C,ATP1A1,B3GALT5,BSCL2,BUB1B,BUB3,CACNA1C,CAND1,CAPRIN1,CARD11,CASP4,CASS4,CAV2,Ccl27a,CCNB2,CCR1,CCT3,CEP250,CHD7,CLU,COG2,CSF1R,CSNK1D,CTNNA1,CTSD,DBF4,DCAF6,DDX60,DFFA,DNAJA3,DONSON,DUSP6,DUSP7,E2F4,ECE1,ECSIT,EEF2,EIF3G,EIF4G3,ELF2,EPHA1,ETFA,EXOSC7,FAIM2,FASTK,FBXW7,FCGR…	205 (54)	53
BAIAP2	kinase	Akt,AKT1,BAIAP2,CASP1,CDK6,CTNNB1,EGFR,ELK1,ERK1/2,ESR1,HIF1A,HRAS,JUN,MAP3K1,MAPK11,MAPK14,MAPK3,MAPK8,MMP2,MYC,NFAT5,NFKBIA,PI3K (complex),PLCG2,PRKAA,PRKCA,Rac,RAC1,RAF1,RAS,SRC,SRF,STAT1,STAT5a/b,TCF7L2,TP53,ZAP70	3	1.32e-10	1.18e-08	0.0002	ABCA9,ABCC4,ABCF3,ABHD2,ACADM,ACOT7,ACSF2,AGGF1,AIMP2,AK1,ANAPC4,ANG,APOB,APOBEC3B,ARAP2,ARSG,ARVCF,ASRGL1,ATG4C,B3GALT5,BUB1B,BUB3,CAND1,CARD11,CAV2,CCT3,CEP250,CLK1,COG2,COPA,CSDE1,CSF2RB,CSNK1D,CX3CR1,DAGLB,DBF4,DDX60,DNAJA3,DROSHA,DUSP7,E2F4,ECE1,ECSIT,EEF2,EIF3G,EIF4G3,EMP3,EPHA4,EXOSC7,FHIT,FOXO4,FZD5,GALNT1,GCNT2,GSDMD,HADHB,HLA-DMB,HS2ST1,IMPACT,INPP4A,JMY,KCNJ3,KCNQ1OT1,KLHL24,KMT2D,LIG3…	153 (37)	34
NSD2	enzyme	26s Proteasome,ABL1,Akt,AKT1,AR,BHLHE40,BRCA1,CASP8,CCND1,CDC25A,CDKN1A,CDKN2A,CEBPA,Creb,CTNNB1,DDX5,E2F1,EIF2AK3,EIF4E,ERBB2,ERK1/2,EZH2,FAS,FOS,FOXO3,GLI1,GSK3B,HIF1A,HNF4A,IGF1R,IGFBP3,IL6,JUN,KAT2B,MAPK8,MAPK9,mir-145,mir-21,MTOR,MYC,MYCN,MYOD1,NANOG,NFkB (complex),NFKBIA,NOTCH1,NPM1,NSD2,p70 S6k,PGR,PI3K (complex),PPIF,PRKAA1,RALA,RB1,SP1,SRC,STAT3,STAT5a/b,TP53,TP63,TP73,TSC2,ZBTB16	3	1.38e-10	1.21e-08	0.0011	ABCA9,ABCF3,ACADM,ACOT7,ACSF2,ADRA2A,AGGF1,AIMP2,AK1,AKR1B1,ANAPC4,ANG,Arf2,ARHGAP35,ARL6IP1,ARVCF,ASRGL1,ASTN1,ATG14,ATG4C,ATP1A1,ATP8A1,B3GALT5,B4GALT6,BUB1B,BUB3,CAMK1D,CAND1,CAPRIN1,CARD11,CASS4,CAV2,Ccl27a,CCNB2,CCR1,CCT3,CHD1,CHD7,CHPT1,CLU,COG2,CPD,CSF1R,CSNK1D,CTSD,DBF4,DCAF6,DFFA,DNAJA3,DONSON,DUSP3,DUSP6,DUSP7,E2F4,EARS2,ECE1,ECSIT,EEF2,EIF3G,EIF4G3,ELF2,EPHA1,EPHA4,ESYT3,ETFA,ETS2,EXOS…	224 (64)	63
Smad2/3/4	group	Akt,AKT1,Ap1,AR,BRCA1,BRD4,CASP8,Cbp/p300,CCN2,CCND1,CDKN1A,Creb,CSF2,EGFR,ERK1/2,ERN1,ESR1,ESR2,estrogen receptor,FOS,FOXO1,HNF4A,IGF1,IL2,IRF7,JUN,KDM5B,LEF1,MMP2,MTOR,MYC,Nfat (family),NFE2L2,NFKBIA,NOTCH1,NR3C2,PPARG,PPARGC1A,SMAD2,Smad2/3/4,SMAD3,SMAD4,SOX9,SP1,STAT1,STAT3,STK11,Tgf beta,TGFB1,TGM2,TP53,VDR,VitaminD3-VDR-RXR,YAP1	3	1.39e-10	1.21e-08	0.0005	ABCC4,ABCF3,ABHD2,ACOT7,ACTR1B,AGAP2,AGGF1,AIMP2,AKR1B1,ANAPC4,ANG,APOB,APOBEC3B,ARHGAP35,ARID4A,ARSG,ARVCF,ASTN1,ATG14,ATG4C,ATP8A1,B3GALT5,B4GALT6,BSCL2,BUB1B,CACNA1C,CAND1,CAPRIN1,CATSPER2,CBLB,Ccl27a,CCR1,CCT3,CCT7,CDO1,CEP250,CHPT1,CLK1,CNNM1,COG2,COPA,CSDE1,CSF2RB,CSNK1D,DBF4,DDX10,DNAJA3,DOCK10,DROSHA,DUSP3,DUSP6,DUSP7,ECSIT,EEF2,EIF3G,EIF4G3,EIF4H,EMP3,EPHA4,ESYT3,ETFA,ETS2,EVL,EXOSC7,FAM…	210 (54)	52
RPS6KB1	kinase	Akt,Creb,CREB1,E2f,EEF2K,EIF4B,FMR1,GSK3B,HIF1A,MAPT,MDM2,MTOR,MTORC1,NFKB1,PI3K (complex),RICTOR,RPS6KB1,TARBP2,TP53	2	1.42e-10	1.23e-08	0.0001	ABCC4,ACSF2,AIMP2,AK1,AKR1B1,ANAPC4,APOB,ARHGAP33,ARHGAP35,ARL6IP1,ARVCF,ATG4C,ATP1A1,ATP6V1G2,BUB1B,CACNA1C,CAMK1D,CAND1,CARD11,CASP4,CAV2,CCNB2,CCR1,CHD1,CLU,Cox6c,CPD,CSF1R,CSNK1D,DAXX,DCAF6,DNAJA3,DROSHA,E2F4,ECE1,EEF2,EIF4G3,ETFA,FHIT,FKBP1A,FLT1,FYN,GADD45G,GAS7,GCNT2,HADHB,Hmgn2 (includes others),HSP90AB1,IMPACT,INPP4A,ITGA5,KCNIP2,KMT2D,L1CAM,LMBRD1,MAG,MALAT1,MAP1B,MAP2K1,MAPK1,MCAT,MDGA…	125 (19)	19
YAP/TAZ	group	Akt,AKT1,AR,CASP8,CCNE1,Cdc42,CDKN1A,CREB1,EGFR,EIF4E,ELK1,ERK1/2,estrogen receptor,FOXO1,HIF1A,HRAS,IGF1R,IKK (complex),IRF3,JUN,MAP2K1/2,MAPK1,MAPK14,MAPK3,MMP2,MTOR,MTORC1,NFkB (complex),NR4A1,p70 S6k,PI3K (complex),PI3K (family),PIK3R1,PTEN,PTPN6,RAF1,RB1,RPTOR,RUNX2,SMAD2,SMAD3,SP1,STAT1,STAT3,STAT5a/b,STAT6,TAFAZZIN,TEAD,TEAD1,TEAD4,TP53,TP73,TSC2,WWTR1,YAP/TAZ,YAP1	3	1.45e-10	1.24e-08	0.0002	ABCA9,ABCC4,ABHD2,ACADM,ACOT7,ACOX1,ACSF2,ADRA2A,AGGF1,AIMP2,AK1,ANAPC4,APOB,ARHGAP33,ARHGAP35,ARL6IP1,ATG14,ATP8A1,B4GALT6,BSCL2,CAND1,CARD11,CASP4,CASS4,CAV2,Ccl27a,CCNB2,CCR1,CCT3,CDO1,CEP250,CHD1,CHPT1,CLK1,CNNM1,Cox6c,CPD,CSF2RB,CSNK1D,CTNNA1,CTSD,CTSZ,DBF4,DCAF6,DDX60,DIDO1,DNAJA3,DOCK10,E2F4,ECE1,EEF2,EIF4G3,EPHA4,ESYT3,ETS2,FAM102A,FAM3A,FANCF,FASTK,FBXW7,FCGR2A,FGFR1,FHIT,FKBP1A,FLT1,FYC…	182 (56)	55
TOPBP1	other	26s Proteasome,ABL1,Akt,AKT1,AR,ATR,BHLHE40,CASP8,CCND1,CCNE1,CDK2,CDKN1A,CDKN2A,CEBPA,CEBPB,CHEK1,CHEK2,CREB1,DDX5,E2F1,EGFR,EIF2AK3,EIF4E,ERBB2,estrogen receptor,FAS,FOXO1,FOXO3,FOXP3,GLI1,GSK3B,H2AX,HIF1A,HNF4A,IGF1R,IGFBP3,IL6,ING1,JUN,KAT2B,MAPK1,MAPK9,MCL1,MTOR,MYC,MYOD1,NANOG,NBN,NCOA1,NFKBIA,NOTCH1,NPM1,NR1I2,p70 S6k,POU5F1,PPARG,PPIF,PRKAA1,PTTG1,SIRT1,SMAD3,SMARCA4,SOX2,SRC,TOPBP1,TP53,…	3	1.49e-10	1.26e-08	0.0004	ABCA9,ABCF3,ACADM,ACSF2,AGGF1,AIMP2,AK1,AKR1B1,ANAPC4,ANG,Arf2,ARHGAP33,ARL6IP1,ARVCF,ASCC1,ASTN1,ATG14,ATG4C,ATP1A1,ATP8A1,B4GALT6,BSCL2,BUB1B,BUB3,C1orf54,CAND1,CAPRIN1,CARD11,CASP4,CASS4,CAV2,Ccl27a,CCNB2,CCT3,CHD1,CHD7,CHPT1,CLK1,CLU,CNNM1,COG2,CSDE1,CSF1R,CSNK1D,CTSD,DCAF6,DIDO1,DNAJA3,DOCK10,DONSON,DUSP6,DUSP7,E2F4,EEF2,EIF3G,EIF4G3,ELF2,EPHA4,ESYT3,ETFA,EXOSC7,FAIM2,FAM3A,FASTK,FBXW7,FCGR2…	214 (69)	65
G3BP1	enzyme	26s Proteasome,AKT1,AR,BHLHE40,CASP8,CBL,CCND1,CD247,CD3,CDKN1A,CDKN2A,CEBPA,CREB1,CTLA4,CTNNB1,CXCL12,DDX5,E2F1,EGFR,EIF2AK3,EIF4E,ERBB2,ESR2,FAS,FOXO3,G3BP1,GLI1,HIF1A,HNF4A,HRAS,IGF1R,IGFBP3,IL6,JUN,KAT2B,LCK,MAPK1,MAPK9,mir-145,mir-23,MTOR,MYC,NANOG,NFATC4,NFE2L2,NOTCH1,NPM1,NRAS,p70 S6k,PGR,PLCG2,PPARG,PPIF,PRKAA1,PRKCD,PTEN,RB1,RYR1,SMAD3,SP1,STING1,TCR,TP53,TP73,TSC2,USP10,ZAP70	3	1.51e-10	1.26e-08	0.0004	2810025M15Rik,ABCA9,ABCF3,ACADM,ACOT7,ACSF2,AK1,AKR1B1,ANAPC4,APOBEC3B,Arf2,ARHGAP33,ARHGAP35,ARL6IP1,ARPC4,ARVCF,ASRGL1,ASTN1,ATG14,ATG4C,ATP1A1,ATP8A1,B4GALT6,BSCL2,BUB1B,CAMK1D,CAND1,CAPRIN1,CARD11,CASP4,CASS4,CAV2,CBLB,Ccl27a,CCNB2,CDO1,CHD1,CHD7,CHPT1,CLU,CNNM1,CSF1R,CSNK1D,DAGLB,DBF4,DCAF6,DDX10,DDX60,DFFA,DNAJA3,DONSON,DUSP6,DUSP7,ECSIT,EEF2,EIF4G3,ELAVL3,ELF2,EPHA1,EPHA4,ESYT3,ETFA,EXOSC7…	208 (67)	64
DNMT3B	enzyme	Akt,AKT1,AR,CASP8,CCNE1,Cdc42,CDKN1A,CREB1,CTNNB1,DNA-methyltransferase,DNMT1,DNMT3A,DNMT3B,EGFR,EIF4E,ELK1,ERK1/2,estrogen receptor,FOXO1,HIF1A,HRAS,IGF1R,IKK (complex),MAPK1,MAPK14,MAPK3,MMP2,MTOR,MTORC1,NFkB (complex),NFKB1,p70 S6k,PEA15,PI3K (complex),PI3K (family),PIK3R1,PTEN,PTK2,PTPN6,RB1,RELA,RPTOR,SMAD3,SP1,STAT1,STAT3,STAT5a/b,STAT6,STK3,TP53,TSC2	3	1.52e-10	1.26e-08	0.0004	ABCA9,ABCC4,ABHD2,ACADM,ACOT7,ACOX1,ACSF2,ADRA2A,AIMP2,AK1,ANAPC4,APOB,APOBEC3B,ARHGAP33,ARHGAP35,ARL6IP1,ARVCF,ASRGL1,ATG14,ATG4C,ATP8A1,B4GALT6,BSCL2,CACNA1C,CAND1,CARD11,CASP4,Ccl27a,CCNB2,CCR1,CCT3,CDO1,CEP250,CHD1,CHPT1,CLK1,CNNM1,CPD,CSF1R,CSF2RB,CSNK1D,CTNNA1,CTSZ,DAXX,DBF4,DDX60,DNAJA3,DOCK10,DROSHA,E2F4,ECE1,EEF2,EIF4G3,EMP3,EPHA4,ESYT3,ETS2,FAM102A,FAM3A,FANCF,FASTK,FBXW7,FCGR2A,FGFR1,F…	181 (51)	50
YWHAH	transcription regulator	26s Proteasome,Akt,AKT1,CASP8,CCNE1,CDC25A,CREB1,CTNNB1,E2f,EGFR,ERK,ERK1/2,FOXO1,GATA4,GC-GCR dimer,GCK,glucocorticoid,GSK3B,HRAS,IKBKB,JUN,LPL,MAP2K1,MAP2K1/2,MAPK1,MAPK14,MAPK3,MAPK8,MAPT,MCL1,Mek,MYOD1,NFE2L2,NFKB1,NFKBIA,NOTCH1,NR3C1,NUMBL,p70 S6k,PDGFRB,Pkc(s),PRKN,RAF1,RIPK3,SNCA,SRC,STAT3,TFEB,TP53,YWHAH	3	1.57e-10	1.29e-08	0.0001	ABCA9,ABCC4,ABHD2,ACADM,ACOT7,ACOX1,ACSF2,AIMP2,AK1,AKR1B1,ANAPC4,ANG,APOB,ARHGAP33,ARHGAP35,ARVCF,ASRGL1,ATG14,ATG4C,ATP1A1,B3GALT5,BUB1B,CAMK1D,CAND1,CARD11,CAV2,CBLB,Ccl27a,CCT3,CCT7,CDO1,CEP170B,CHD1,CLK1,CPD,CSF2RB,CSNK1D,CTNNA1,CX3CR1,DNAJA3,DOCK10,DROSHA,DUSP6,E2F4,ECE1,EEF2,EIF3G,EIF4G3,EMP3,ETFA,FAM102A,FBXW7,FCGR2A,FGFR1,FHIT,FKBP1A,FOXO4,FZD5,GALNT1,GAS7,GCNT2,GNA11,GOT2,GPR137B,HADHB,…	154 (50)	47
USP35	peptidase	AHR,Akt,AKT1,APP,AR,Calcineurin protein(s),CASP8,CCNE1,Creb,CREB1,CYP19A1,EGF,EGFR,EP300,ERBB2,ERK,ERK1/2,ESR1,ESR2,G protein alpha i,GATA1,GSK3B,HIF1A,IFN alpha/beta,IGF1R,MMP2,NCOA2,Nr1h,NR3C1,NR4A1,PI3K (complex),Pkc(s),PRKCD,PTK2,RUNX2,SMAD3,SP1,SRC,SREBF2,STAT5B,STING1,tamoxifen,TP53,UBA3,USP35	3	1.6e-10	1.3e-08	0.0003	ABCA9,ABCC4,ABHD2,ACADM,ACOT7,ACOX1,ACSF2,AGGF1,AIMP2,AK1,ANAPC4,ANG,ARHGAP33,ARHGAP35,ARL6IP1,ARSG,ARVCF,ATG4C,ATP8A1,B4GALT6,BSCL2,BUB1B,BUB3,CACNA1C,CAND1,CARD11,CBLB,Ccl27a,CCR1,CCT3,CCT7,CDO1,CEP250,CHD1,CHD7,CHPT1,CLK1,CNNM1,COG2,COPA,CSF2RB,CSNK1D,CTSD,DBF4,DDX10,DDX60,DNAJA3,ECE1,EIF4G3,ELF2,EPHA4,ESYT3,ETFA,ETS2,EVL,EXOSC7,FAM3A,FBXW7,FCGR2A,FGFR1,FHIT,FKBP1A,FOXO4,G6PC3,GAB3,GADD45G,GAS…	189 (45)	44
